# Supplementary material for: Dynamic Protein Phosphorylation in Streptococcus pyogenes during Growth, Stationary Phase, and Starvation
Source: MDPI journal article supplement (doi:10.3390/microorganisms12030621), 2024-03-20
Supplement: s1 [file s1]

## Supplementary Figures S1-S16

# **Dynamic protein phosphorylation in *Streptococcus pyogenes* during growth, stationary phase, and starvation**

**Stefan Mikkat<sup>1\*</sup>, Michael Kreutzer<sup>2</sup>, Nadja Patenge<sup>3\*</sup>**

<sup>1</sup> Core Facility Proteome Analysis, Rostock University Medical Center, 18057 Rostock, Germany

<sup>2</sup> Medical Research Center, Rostock University Medical Center, 18057 Rostock, Germany

<sup>3</sup> Institute of Medical Microbiology, Virology and Hygiene, Rostock University Medical Center, 18057 Rostock, Germany

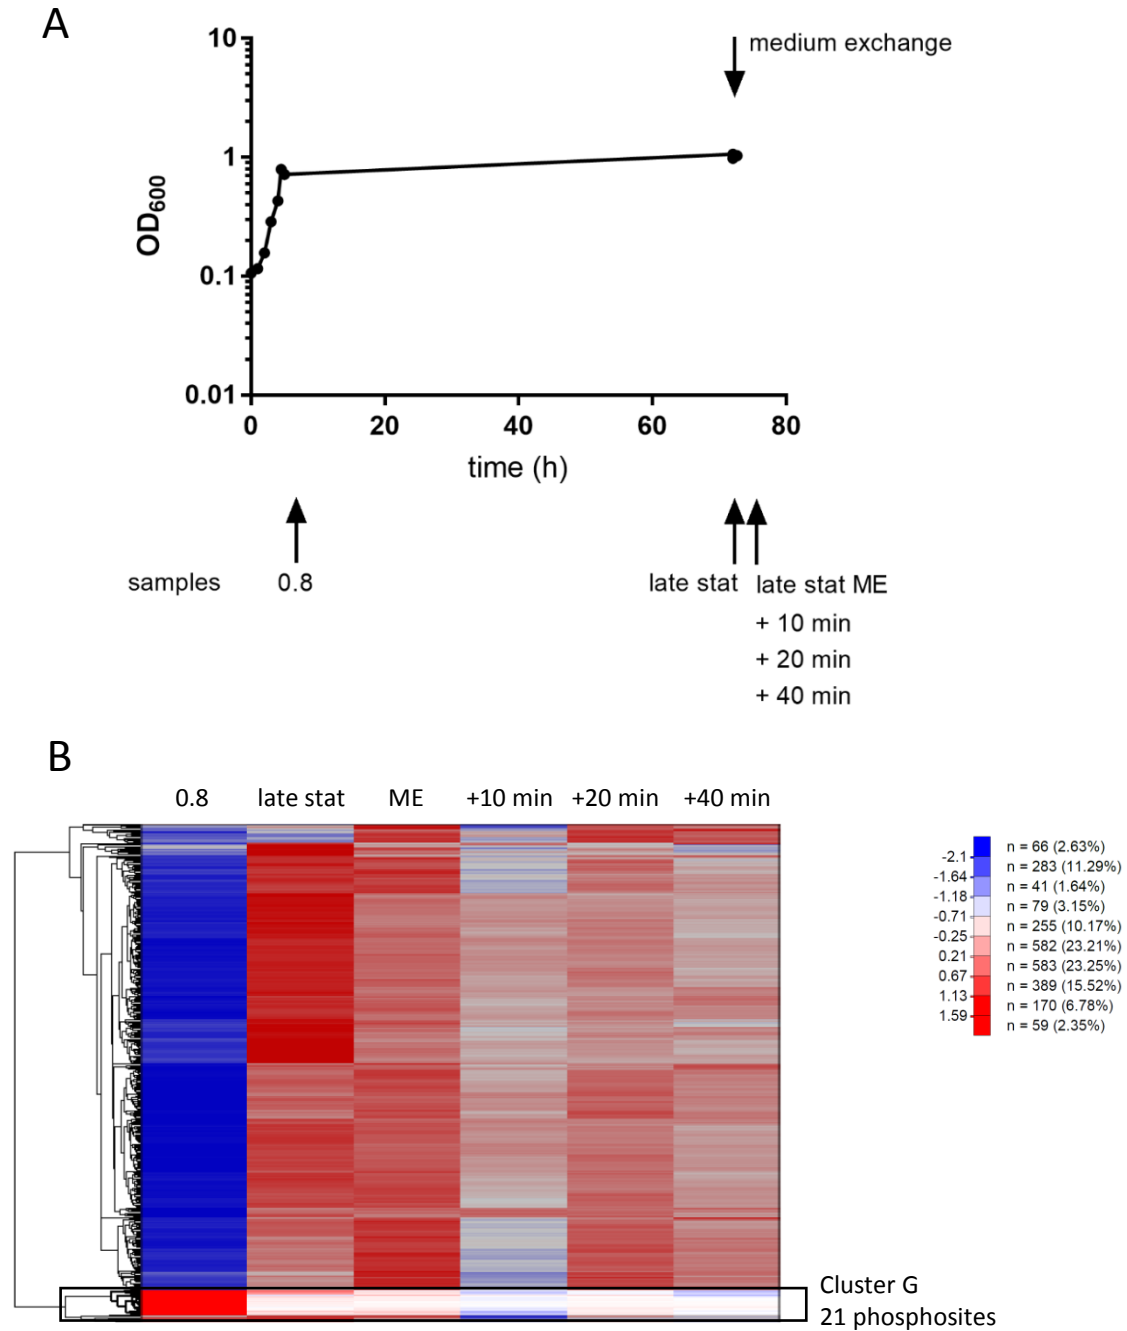

**Figure S1.** Bacterial growth and hierarchical clustering of protein level-normalized phosphorylation site abundances of the third experiment. **(A)** *S. pyogenes* was grown in THY for 72 h until the late stationary phase. For medium exchange (ME), bacterial cultures were centrifuged, pellets were suspended in fresh THY and incubated for 10, 20, and 40 min. Sample collection is indicated by arrows. 0.8: OD<sub>600</sub> = 0.8; late stat: late stationary phase. **(B)** Hierarchical clustering of 418 protein level-normalized phosphorylation site abundances. The G cluster is outlined and the number of its phosphorylation sites is indicated.

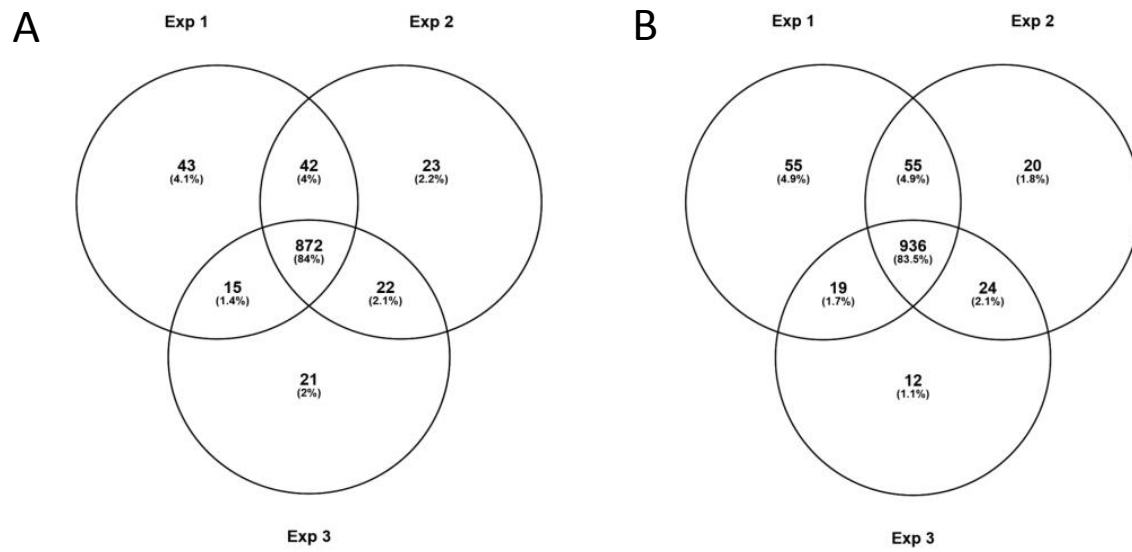

**Figure S2.** Venn diagrams comparing proteins identified in three experiments. **(A)** Proteins identified by at least two unique peptides. **(B)** Proteins identified by at least one unique peptide.

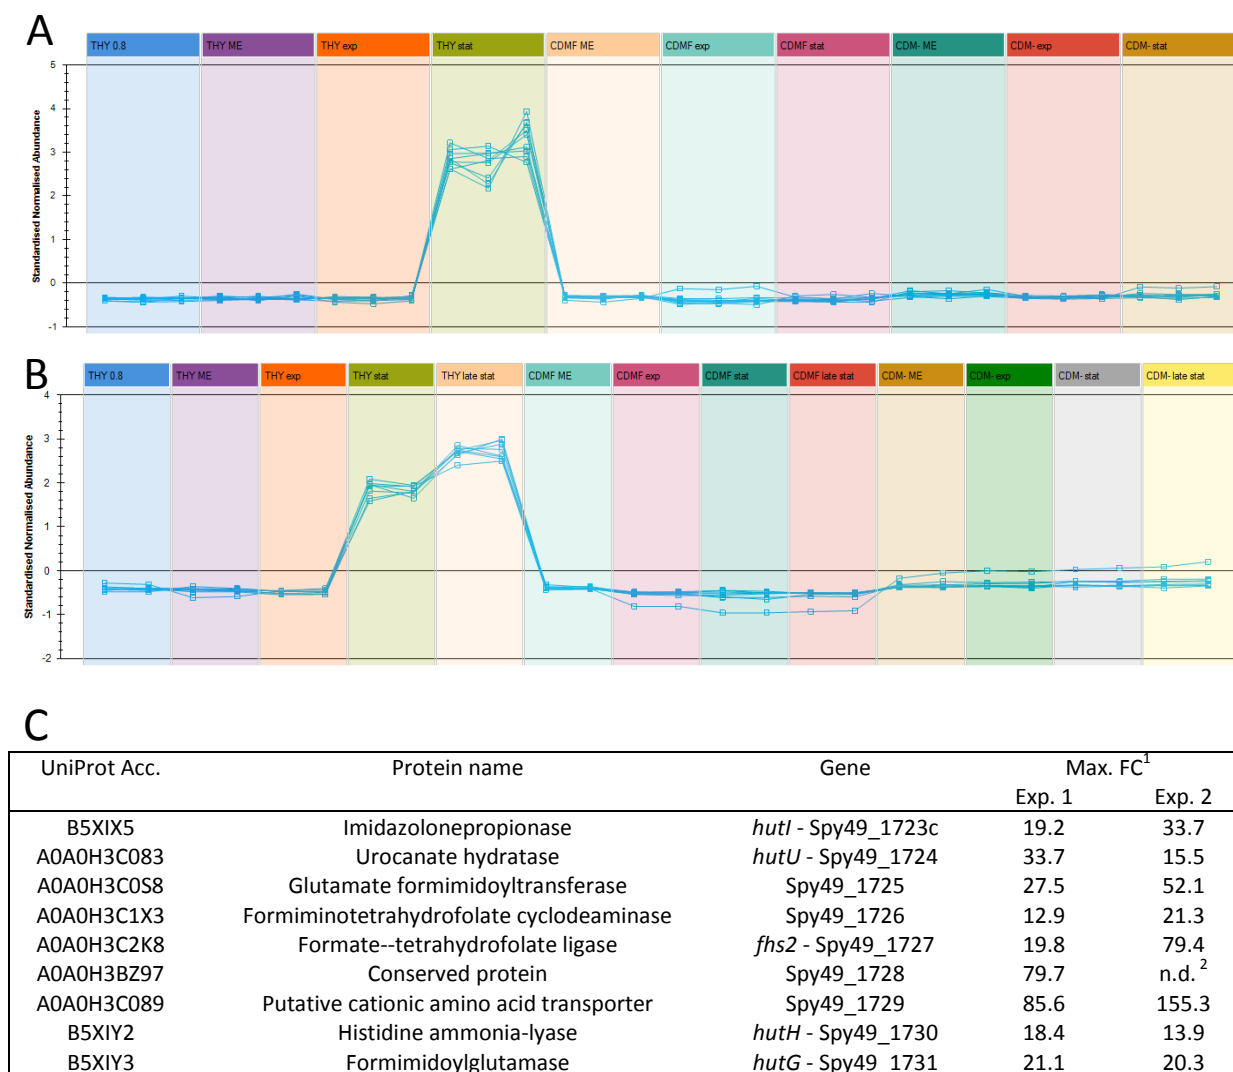

**Figure S3.** Expression profiles of coordinately regulated proteins of the histidine degradation pathway during cultivation in either THY medium (THY), CDM with fructose (CDMF) or CDM without a carbon source (CDM-). The proteins were significantly expressed only during stationary phase in THY. Results from experiment 1 (**A**) and experiment 2 (**B**) are shown. Protein identities and the maximal fold change are indicated in the table (**C**).

<sup>1</sup>) maximal fold change is the highest abundance difference between two growth conditions of the experiment;

<sup>2</sup>) protein was not identified in this experiment.

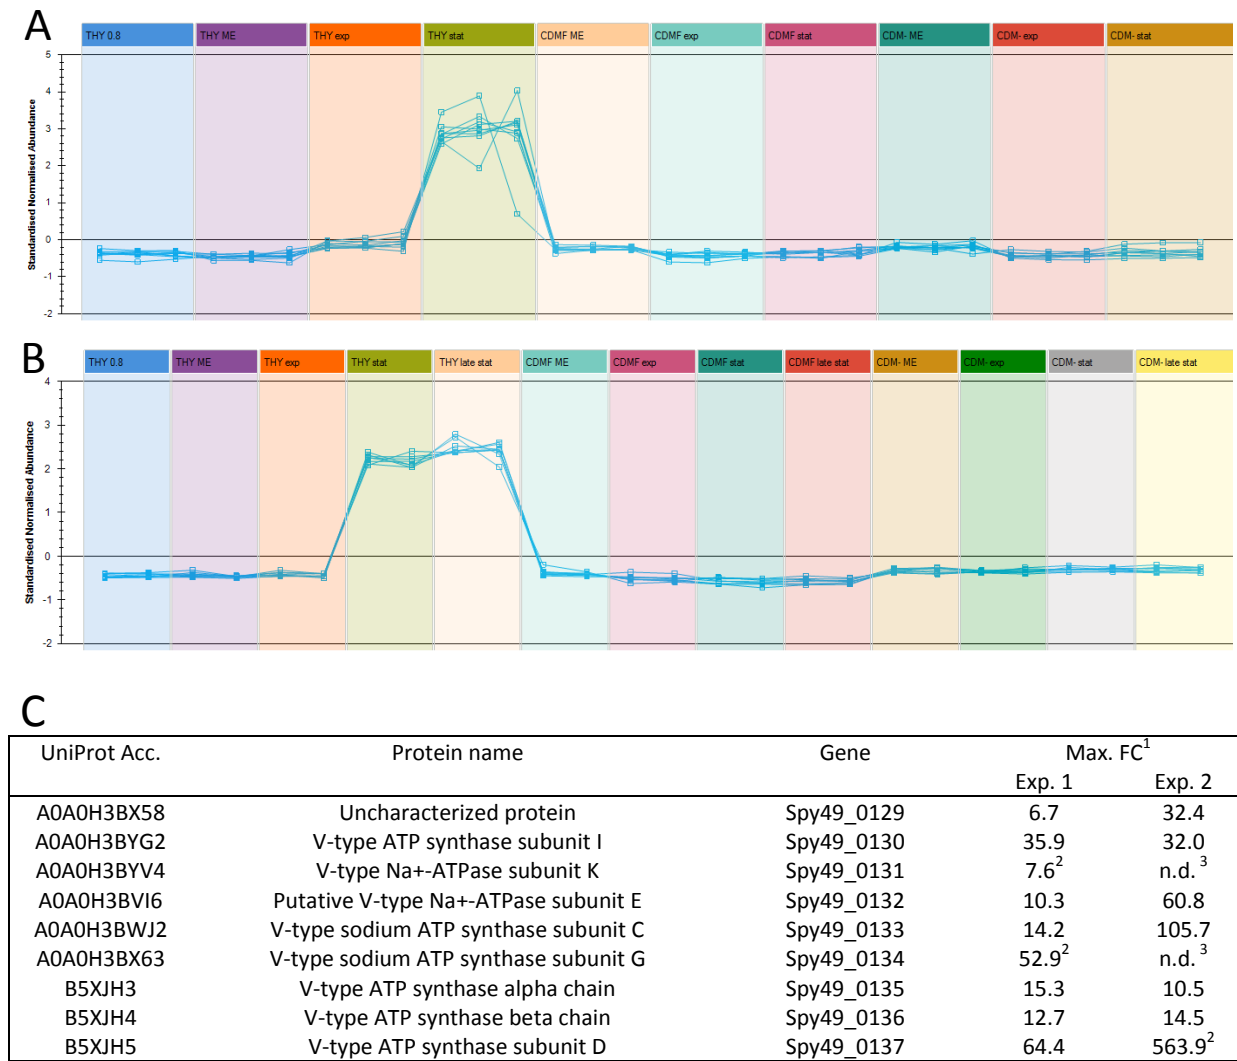

**Figure S4.** Expression profiles of the coordinately regulated V-type ATP synthase subunits during cultivation in either THY medium (THY), CDM with fructose (CDMF) or CDM without a carbon source (CDM-). The proteins were significantly expressed only during stationary phase in THY. Results from experiment 1 (**A**) and experiment 2 (**B**) are shown. Protein identities and the maximal fold change are indicated in the table (**C**).

<sup>1</sup>) maximal fold change is the highest abundance difference between two growth conditions of the experiment;

<sup>2</sup>) protein was identified by a single unique peptide;

<sup>3</sup>) protein was not identified in this experiment.

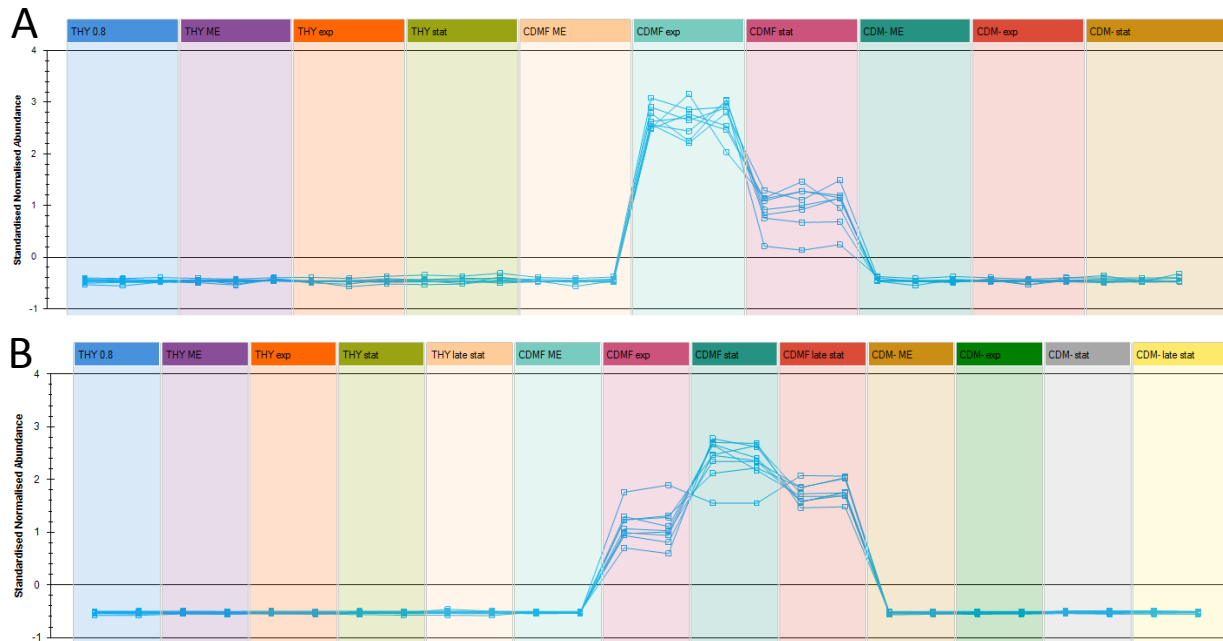

**C**

| UniProt Acc. | Protein name                                 | Gene       | Max. FC <sup>1</sup> |        |
|--------------|----------------------------------------------|------------|----------------------|--------|
|              |                                              |            | Exp. 1               | Exp. 2 |
| A0A0H3BX93   | Shikimate 5-dehydrogenase                    | Spy49_0450 | 16.4                 | 182.5  |
| A0A0H3BXU8   | AP_endonuc_2 domain-containing protein       | Spy49_0451 | 17.0                 | 33.3   |
| A0A0H3BZ61   | F420_ligase domain-containing protein        | Spy49_0453 | 79.0                 | 388.7  |
| A0A0H3BZ12   | Uncharacterized protein                      | Spy49_0454 | 66.5                 | 37.9   |
| A0A0H3BW88   | Archaeal S-adenosylmethionine synthetase     | Spy49_0455 | 89.4                 | 169.7  |
| A0A0H3BX98   | Uncharacterized protein                      | Spy49_0456 | 74.3                 | 55.1   |
| A0A0H3BXV2   | Glyco_trans_2-like domain-containing protein | Spy49_0457 | 42.1                 | 344.2  |
| A0A0H3BZI9   | UDP-glucose 6-dehydrogenase                  | Spy49_0459 | 17.5                 | 21.4   |
| A0A0H3BW93   | Putative efflux protein                      | Spy49_0460 | 1994.7 <sup>2</sup>  | 64.4   |

**Figure S5.** Expression profiles of a group of fructose-induced proteins during cultivation in either THY medium (THY), CDM with fructose (CDMF) or CDM without a carbon source (CDM-). The proteins were significantly expressed only in CDMF. The results from experiment 1 **(A)** and experiment 2 **(B)** indicate faster adaption to fructose utilization in experiment 1. Protein identities and the maximal fold change are indicated in the table **(C)**.

<sup>1)</sup> maximal fold change is the highest abundance difference between two growth conditions of the experiment;

<sup>2)</sup> protein was identified by a single unique peptide.

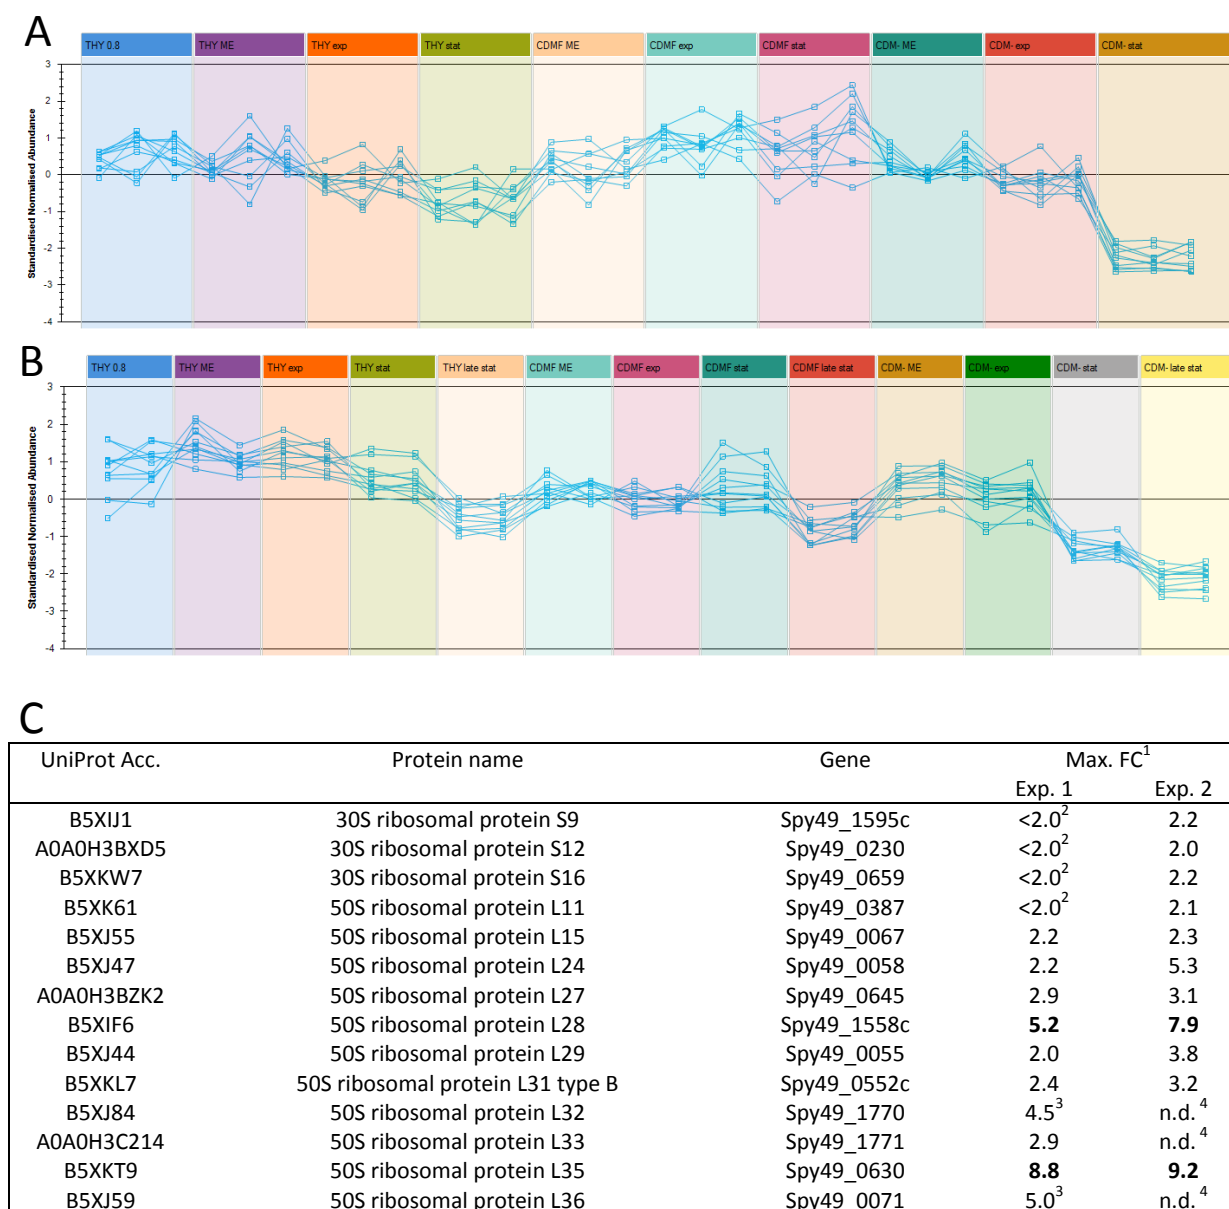

**Figure S6.** Expression profiles of selected ribosomal proteins during cultivation in either THY medium (THY), CDM with fructose (CDMF) or CDM without a carbon source (CDM-). Results from experiment 1 **(A)** and experiment 2 **(B)** are shown. Protein identities and the maximal fold change are indicated in the table **(C)**.

- <sup>1</sup>) maximal fold change is the highest abundance difference between two growth conditions of the experiment;
- <sup>2</sup>) FC was below 2.0 in experiment 1, the corresponding expression profiles are not shown;
- <sup>3</sup>) protein was identified by a single unique peptide;
- <sup>4</sup>) protein was not identified in this experiment.

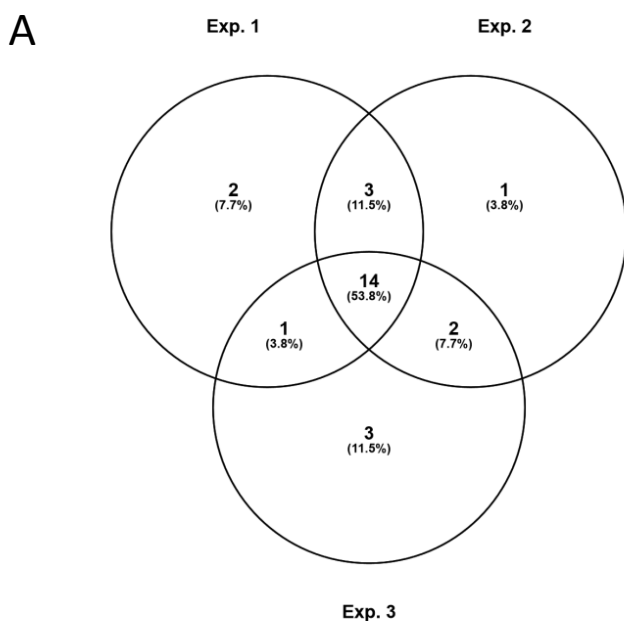

**B**

| UniProt Acc. | Protein name                                  | Gene          | Mean abundance <sup>1</sup> | Rank <sup>2</sup><br>Exp. 1 | Rank<br>Exp. 2 | Rank<br>Exp. 3 |
|--------------|-----------------------------------------------|---------------|-----------------------------|-----------------------------|----------------|----------------|
| A0A0H3BY55   | PASTA kinase SP-STK                           | Spy49_1257c   | 3,098,001                   | 1                           | 1              | 1              |
| A0A0H3BZ18   | Cell-division initiation protein              | <i>divIVA</i> | 814,752                     | 2                           | 3              | 2              |
| A0A0H3BYP4   | Phosphoglucosamine mutase                     | <i>glmM</i>   | 779,102                     | 3                           | 2              | 5              |
| A0A0H3BZL9   | PTS system, fructose-specific IIABC component | <i>fruA</i>   | 179,970                     | 6                           | 4              | 3              |
| A0A0H3BZC1   | Uncharacterized protein                       | Spy49_0377    | 177,597                     | 4                           | 5              | 13             |
| A0A0H3BZD6   | Putative PTS system enzyme II                 | Spy49_1737c   | 120,096                     | 5                           | 10             | 4              |
| B5XMJ7       | Cell cycle protein GpsB                       | <i>gpsB</i>   | 102,556                     | 7                           | 7              | 10             |
| B5XI23       | Protein translocase subunit SecA              | <i>secA</i>   | 92,742                      | 12                          | 11             | 6              |
| B5XK11       | Elongation factor Tu                          | <i>tuf</i>    | 90,657                      | 8                           | 6              | 16             |
| A0A0H3BYM9   | Glyceraldehyde-3-phosphate dehydrogenase      | <i>plr</i>    | 87,956                      | 9                           | 9              | 11             |
| A0A0H3BZR7   | Mid-cell-anchored protein Z                   | <i>mapZ</i>   | 74,843                      | 13                          | 15             | 9              |
| B5XJ02       | UPF0297 protein                               | Spy49_1751c   | 70,210                      | 19                          | 14             | 8              |
| A0A0H3BZ23   | Cell division protein FtsZ                    | <i>ftsZ</i>   | 56,870                      | 14                          | 17             | 18             |
| A0A0H3C2P8   | Uncharacterized protein                       | Spy49_1748c   | 55,877                      | 16                          | 20             | 15             |

<sup>1</sup> The mean abundance was calculated from the abundances of the phosphoproteins in the three experiments

<sup>2</sup> Rank indicates the order within the 20 most abundant phosphoproteins in each experiment

**Figure S7.** Quantitatively predominant phosphoproteins in the exponential growth phase ( $OD_{600} = 0.8$ ) in THY in experiments 1-3. The amounts of all phosphopeptides belonging to a protein were summed up without considering the phosphorylation site, i.e. phosphopeptides with ambiguous phosphosite localization were also taken into account. Phosphopeptide abundances were not normalized to protein levels. From each of the three experiments, the 20 phosphoproteins with the highest abundances were compared (**A**). The 14 overlapping phosphoproteins are listed in the Table (**B**).



A

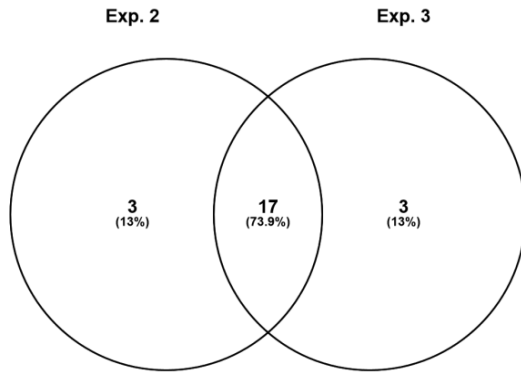

B

| UniProt Acc. | Protein name                                                      | Gene               | Mean abundance <sup>1</sup> | Rank <sup>2</sup><br>Exp. 2 | Rank<br>Exp. 3 |
|--------------|-------------------------------------------------------------------|--------------------|-----------------------------|-----------------------------|----------------|
| A0A0H3BYP4   | Phosphoglucosamine mutase                                         | <i>glmM</i>        | 1,074,445                   | 2                           | 3              |
| A0A0H3BYW2   | EIICB-Lac lacE                                                    | <i>lacE</i>        | 1,071,128                   | 3                           | 2              |
| A0A0H3BZD6   | Putative PTS system enzyme II                                     | <i>Spy49_1737c</i> | 1,055,155                   | 5                           | 1              |
| B5XKI1       | Elongation factor Tu                                              | <i>tuf</i>         | 1,040,779                   | 1                           | 4              |
| B5XIW7       | Chaperonin GroEL                                                  | <i>groEL</i>       | 819,809                     | 6                           | 5              |
| A0A0H3BY55   | PASTA kinase SP-STK                                               | <i>Spy49_1257c</i> | 798,559                     | 4                           | 7              |
| A0A0H3BZL9   | PTS system, fructose-specific IIBC component                      | <i>fruA</i>        | 712,445                     | 9                           | 6              |
| A0A0H3BZJ0   | Formate acetyltransferase                                         | <i>pfl</i>         | 512,288                     | 8                           | 11             |
| B5XJR1       | Elongation factor G                                               | <i>fusA</i>        | 458,399                     | 11                          | 9              |
| A0A0H3C124   | Putative mannose-specific phosphotransferase system component IID | <i>manN</i>        | 458,143                     | 7                           | 15             |
| A0A0H3BXI0   | Uncharacterized protein                                           | <i>Spy49_1001c</i> | 393,400                     | 20                          | 10             |
| B5XH20       | Chaperone protein DnaK                                            | <i>dnaK</i>        | 386,629                     | 15                          | 12             |
| A0A0H3BY05   | Carbamate kinase                                                  | <i>arcC</i>        | 357,525                     | 18                          | 13             |
| A0A0H3BYM9   | Glyceraldehyde-3-phosphate dehydrogenase                          | <i>plr</i>         | 331,151                     | 14                          | 14             |
| A0A0H3BZX9   | PTS system, mannose-specific IIC component                        | <i>manM</i>        | 307,747                     | 12                          | 18             |
| A0A0H3BZ18   | Cell-division initiation protein                                  | <i>divIVA</i>      | 272,167                     | 16                          | 20             |
| A0A0H3BWF1   | Protein translocase subunit SecY                                  | <i>secY</i>        | 270,617                     | 19                          | 19             |

<sup>1</sup> The mean abundance was calculated from the abundances of the phosphoproteins in both experiments

<sup>2</sup> Rank indicates the order within the 20 most abundant phosphoproteins in each experiment

**Figure S8.** Quantitatively predominant phosphoproteins in the late stationary growth phase in THY in experiments 2 and 3. The amounts of all phosphopeptides belonging to a protein were summed up without considering the phosphorylation site, i.e. phosphopeptides with ambiguous phosphosite localization were also taken into account. Phosphopeptide abundances were not normalized to protein levels. The 20 most abundant phosphoproteins in both experiments were compared (A). The 17 overlapping phosphoproteins are listed in the Table (B).

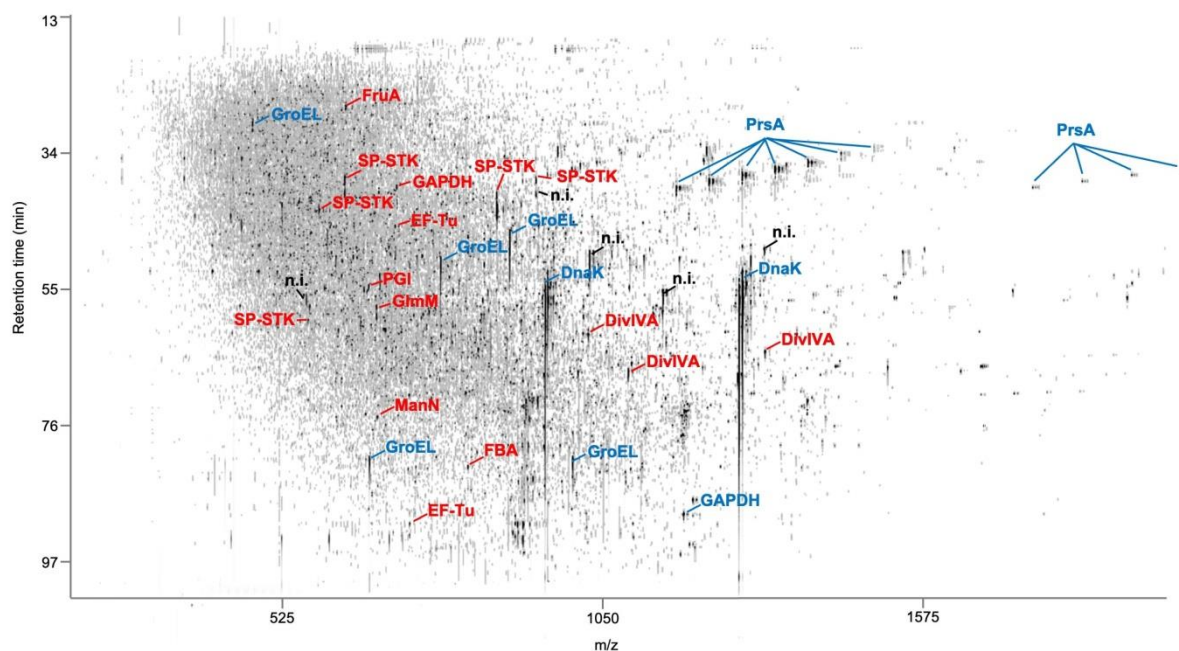

**Figure S9.** Evaluation of the phosphopeptide enrichment method. A plot of  $m/z$  values versus retention time combines all features from the HDMS<sup>E</sup> measurements of experiment 2. Selected nonphosphorylated peptide ions (labeled blue) and phosphopeptide ions (labeled red) are highlighted. DnaK - chaperone protein DnaK; GroEL - chaperonin GroEL; GAPDH - glyceraldehyde-3-phosphate dehydrogenase; PrsA - foldase protein PrsA; SP-STK - non-specific serine/threonine protein kinase; DivIVA - cell-division initiation protein; EF-Tu - Elongation factor Tu; FruA - PTS system fructose-specific IIBC component; FBA - fructose-bisphosphate aldolase class II; PGI - glucose-6-phosphate isomerase; GlnM - phosphoglucosamine mutase; ManN - putative mannose-specific phosphotransferase system component IID; n.i. - not identified.

To evaluate the specificity of phosphopeptide enrichment and the efficiency of identification, we inspected the plot of  $m/z$  versus retention time combining all HDMS<sup>E</sup> data of the second experiment. The most abundant peptide ions derived from one large nonphosphorylated peptide (MYEQAAAAQAAQGAEGAQANDSANNDDVVDGEFTEK) of chaperone protein DnaK. Nonphosphorylated peptides of the chaperonin GroEL were also highly abundant. Among phosphopeptides, prominent ion signals derived from the PASTA kinase SP-STK and cell-division initiation protein (DivIVA). However, many abundant signals were not identified including a striking pattern of ions with decreasing retention time at increasing  $m/z$ . It comprises a series of seven triply charged peptides, each differing by a mass difference of 162 Da, all of which could be assigned to the C-terminal peptide of the foldase protein PrsA (PrtM1) by manual analyses of fragment spectra (Figure S10).

Moreover, an error-tolerant Mascot search revealed frequently occurring lysine phosphoglycerylation (PGK) [42,43] among the enriched phosphopeptides. The specificity of the phosphopeptide enrichment was evaluated for the second experiment based on both the number of unique peptides and their quantitative ratios. Of the total of 3581 peptides identified, the proportion of S/T/Y-phosphorylated peptides was 26%, while 63% were not phosphopeptides and 11% of peptides were modified by lysine phosphoglycerylation. Label-free quantification revealed percentages of S/T/Y-phosphorylated peptides, nonphosphorylated peptides, and PGK-modified peptides of 24%, 73%, and 3%, respectively.

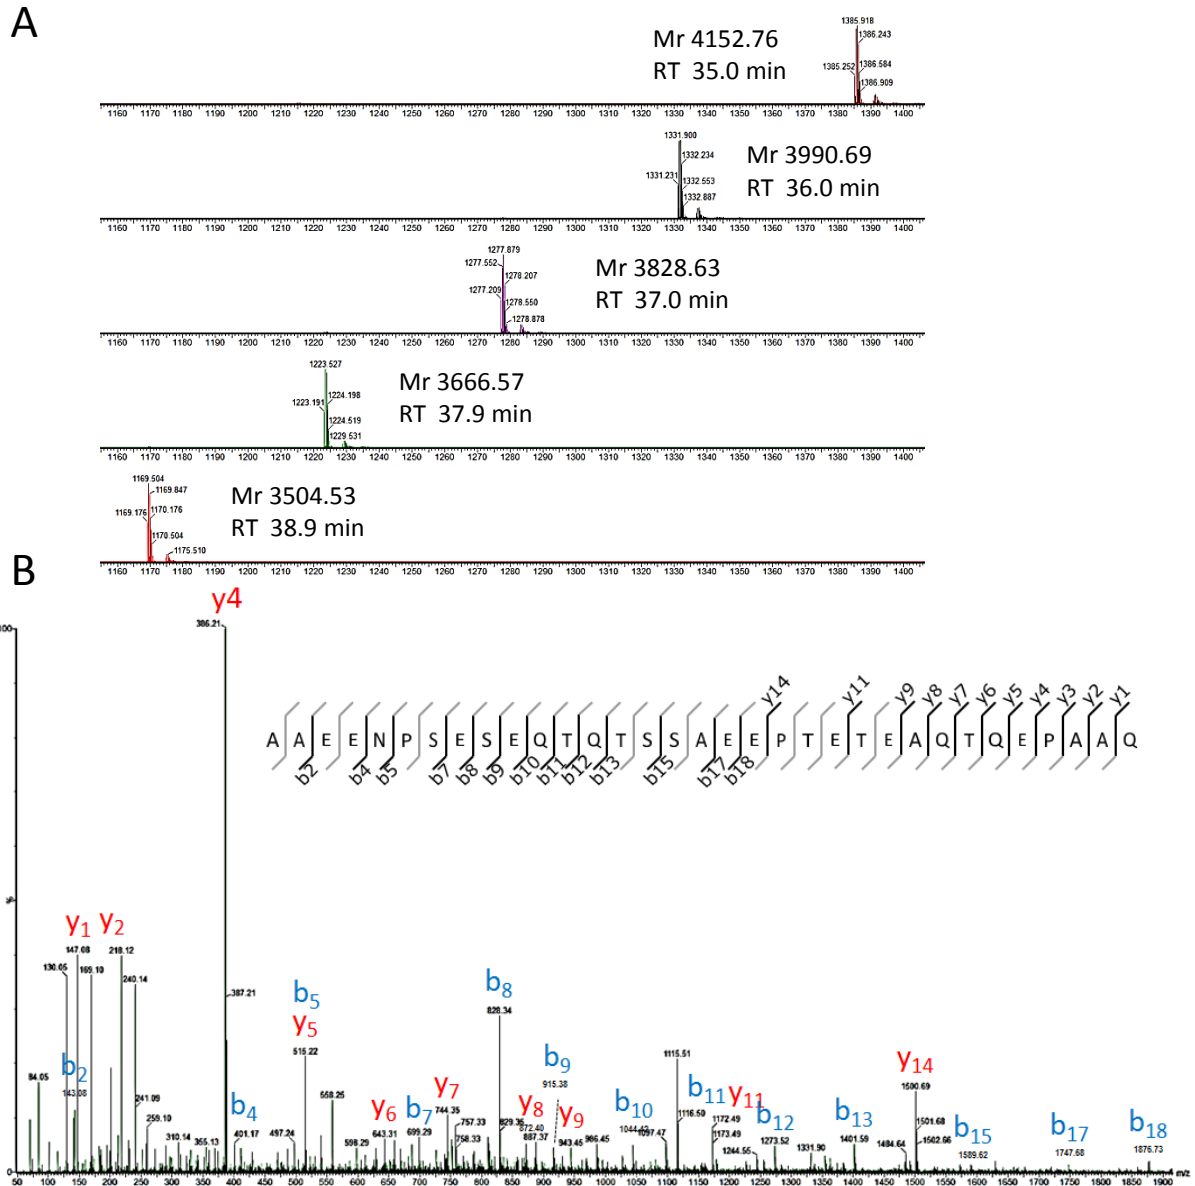

**Figure S10.** Evidence that foldase protein PrsA (PrtM1) is a glycoprotein. A series of triply charged C-terminal peptide ions, each differing by a mass of 162 Da, indicate glycosylation (**A**). Representative fragment spectrum of the C-terminal peptide ion of foldase protein PrsA. The site of glycan modification could not be identified, probably due to the lability of the glycosidic bond (**B**).

A mass increase of 162 Da indicates a sugar moiety. However, the mass spectra did not provide further information about the exact location and nature of the modification. Foldase PrsA is a membrane-bound lipoprotein with peptidyl-prolyl cis-trans isomerase activity that supports folding of exported proteins and contributes to bacterial virulence. Its identification as a putative glycoprotein may prompt further studies that could provide new insights into the virulence mechanisms of *S. pyogenes*.

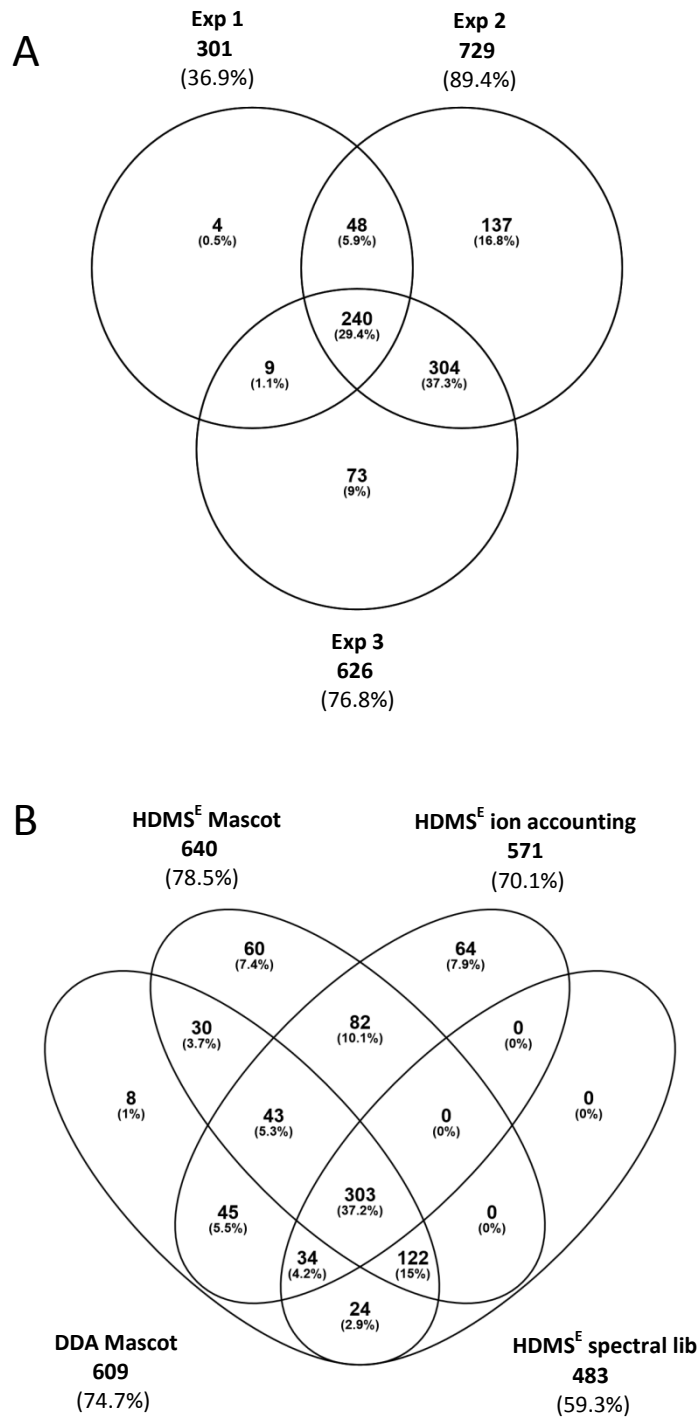

**Figure S11.** Venn diagrams showing numbers and percentages of high-confidence phosphorylation sites identified in each of the three experiments **(A)** and the contribution of different data acquisition and search strategies to the identification of 815 high-confidence phosphorylation sites **(B)**.

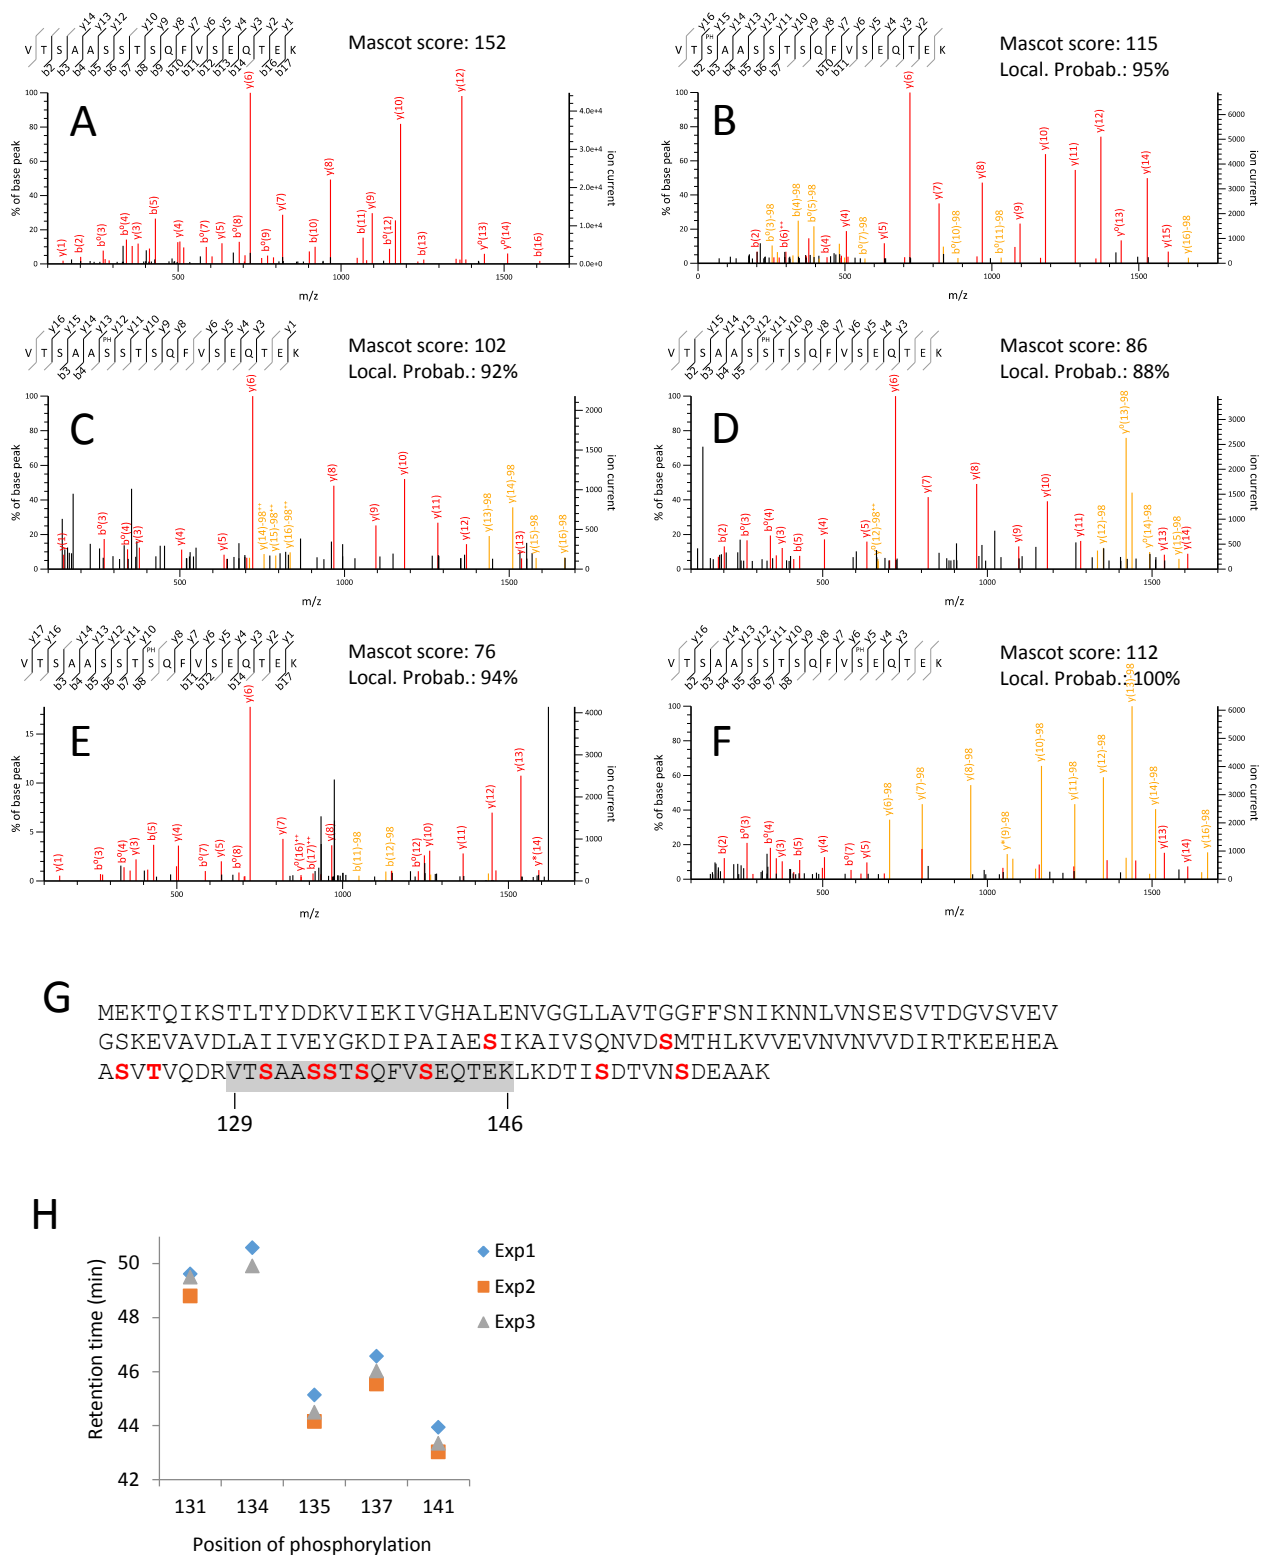

**Figure S12.** Detection of phosphopeptide positional isomers of the peptide VTSAASSTSQFVSEQTEK of the general stress protein, Gls24 family (Spy49\_1001c). MS/MS spectra of doubly protonated peptides were acquired by HDMS<sup>E</sup> and identified using Mascot. The peptide was found nonphosphorylated (**A**), and phosphorylated at S131 (**B**), S134 (**C**), S135 (**D**), S137 (**E**), and S141 (**F**). All identified phosphosites of the protein are indicated in bold red in the amino acid sequence of the Spy49\_1001c protein. The multiply phosphorylated peptide 129-146 is highlighted in grey (**G**). Separation of the phosphopeptide isomers by their retention time is shown in (**H**).

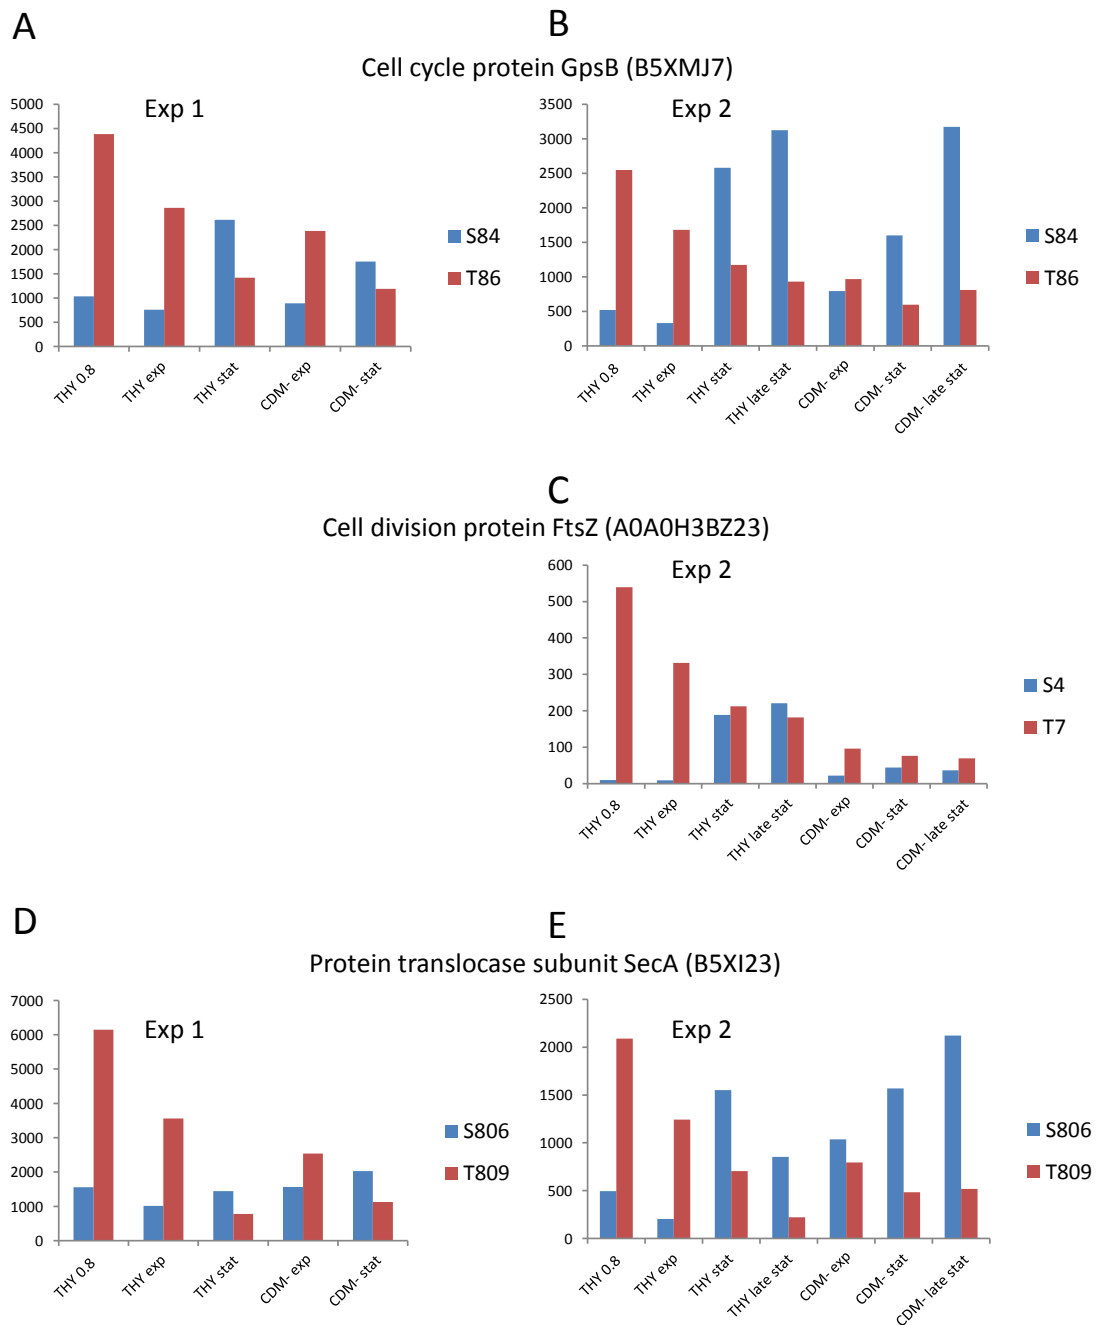

**Figure S13.** Growth phase-dependent phosphorylation of nearby threonine and serine residues located on the same tryptic peptide. **(A,B)** Phosphorylation dynamics of cell cycle protein GpsB in the first **(A)** and second **(B)** experiment. **(C)** Phosphorylation dynamics of cell division protein FtsZ in the second experiment. The phosphosites were not quantified in the first experiment. **(D,E)** Phosphorylation dynamics of protein translocase subunit SecA in the first **(D)** and second **(E)** experiment.

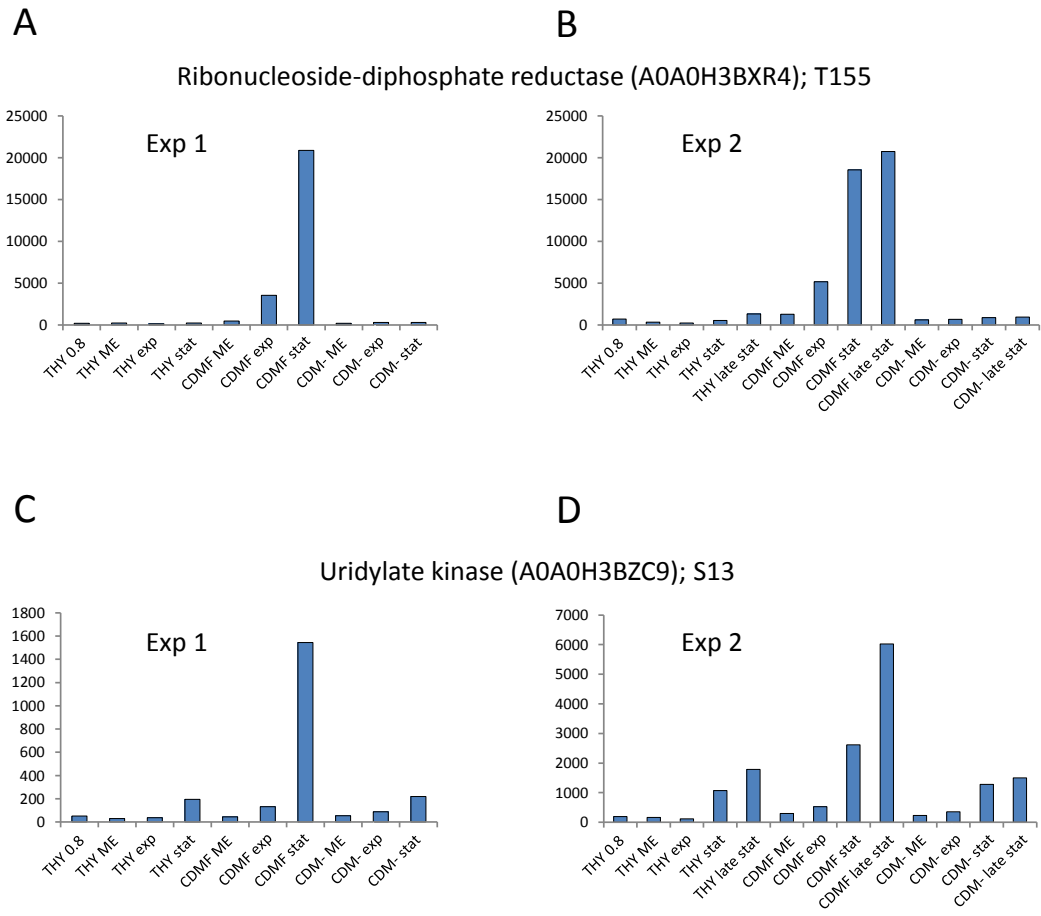

**Figure S14.** Increased phosphorylation events during cultivation in CDMF. **(A,B)** Phosphorylation dynamics of T155 of ribonucleoside-diphosphate reductase in the first **(A)** and second **(B)** experiment. **(C,D)** Phosphorylation dynamics of S13 of uridylate kinase in the first **(C)** and second **(D)** experiment.

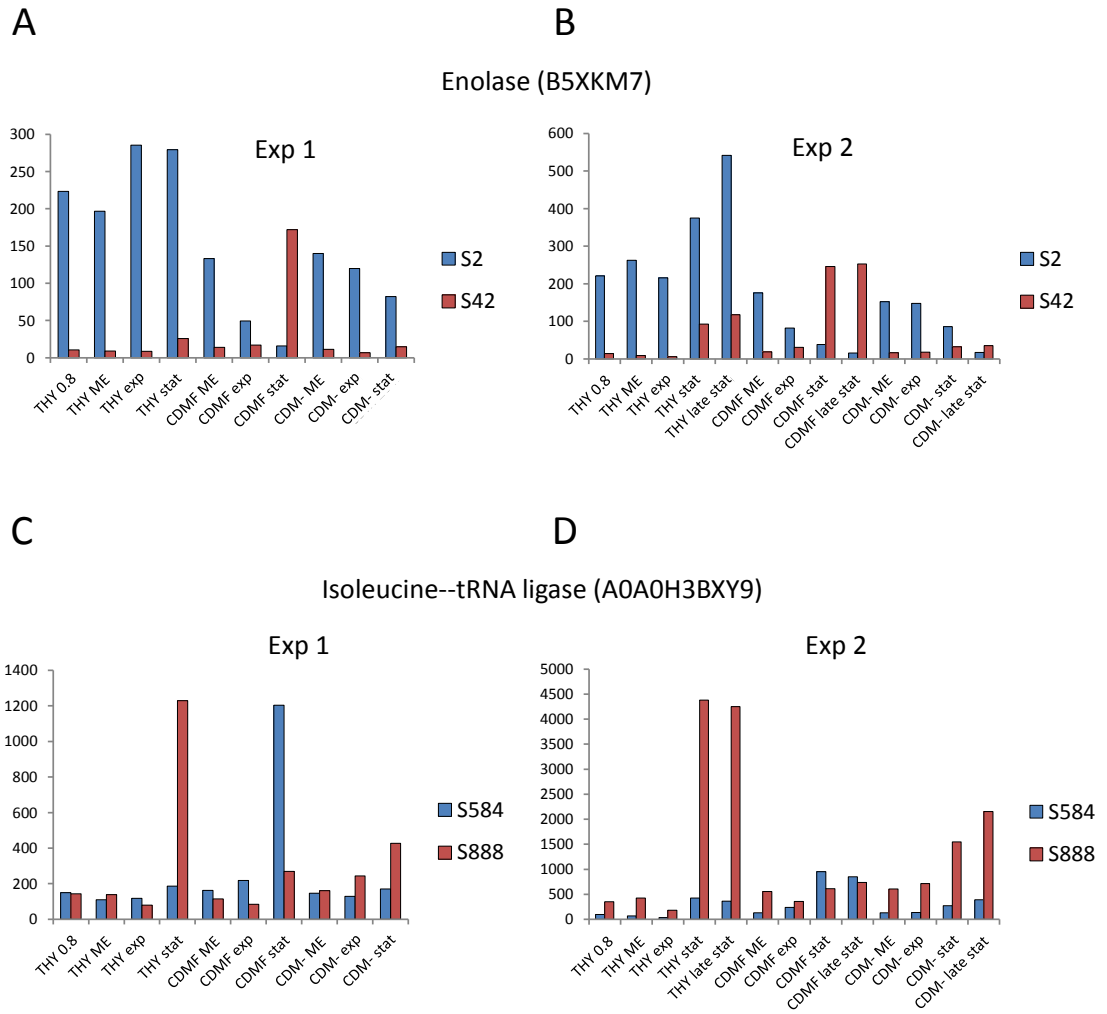

**Figure S15.** Phosphorylation dynamics of enolase and isoleucine-tRNA ligase at different culture conditions. **(A,B)** Phosphorylation dynamics of enolase in the first **(A)** and second **(B)** experiment. **(C,D)** Phosphorylation dynamics of isoleucine-tRNA ligase in the first **(C)** and second **(D)** experiment.



|                                |                                                                    |     |
|--------------------------------|--------------------------------------------------------------------|-----|
| tr Q836G2 Q836G2_ENTFA         | --MANLVYSPKDILQEKF TKMMNGDYPIEVDFLDNVIKDYEAYNKELLSLQEENSRLM        | 58  |
| sp P0CI74 GPSB_BACSU           | MLADKVKLSAKEILEKEFKTG--VRGYKQEDVDKFLDMI KDYETFHQIEEELQQENLQLK      | 59  |
| sp B5XMJ7 GPSB_STRPZ           | --MTSI IYSPKDIFEQE FKTS-MRGFDKKVEVDFLDNVIKDYENFNFAQI EALKAEANEAL K | 57  |
| tr A0A0H3MTG8 A0A0H3MTG8_STRS4 | --MASIKFTTKDIFEQDFKIG-FRGYDQDEVNDFLDDIMKDYDAYEAI IKELKGETAIRLK     | 57  |
| sp Q04M95 GPSB_STRP2           | --MASII FSAKIDIFEQEFGRE-VRGNKVKEVDFLDDVIKYD YETAAVLKS LRQEIA DLK   | 57  |
| :                              | : . : * *: : : A .. : . : : ** : : : * : :                         |     |
| tr Q836G2 Q836G2_ENTFA         | AKL DQLSKAQPTPRV---AQEVPKSAAVNFNDILKRSLNLEREVFVGK KDETPSTPVIPS     | 115 |
| sp P0CI74 GPSB_BACSU           | KGLEEASKQP-----VQSNTNFNDILKRSLNL EKHFVFGSKLYD-----                 | 98  |
| sp B5XMJ7 GPSB_STRPZ           | KAKYQARNIVSATVQVPVQPPTRVASANFNDILKRISKLEKEVFVGKI IE-----           | 108 |
| tr A0A0H3MTG8 A0A0H3MTG8_STRS4 | AQAANSQPKTLPTEEINDLVLRTERPSASANFNDILRR LNRLEKEVFVGKQIQVDQE----     | 111 |
| sp Q04M95 GPSB_STRP2           | EELTRKP KPSP---VQAEPLEAAISSMTNFNDILKR LNRLEKEVFVGK QILDNSDF-----   | 109 |
| :                              | : : *****:*..*:.*.: : :                                            |     |
| tr Q836G2 Q836G2_ENTFA         | APSM PAEPANHVDVDAQIRQF                                             | 136 |
| sp P0CI74 GPSB_BACSU           | -----                                                              | 98  |
| sp B5XMJ7 GPSB_STRPZ           | -----                                                              | 108 |
| tr A0A0H3MTG8 A0A0H3MTG8_STRS4 | -----                                                              | 111 |
| sp Q04M95 GPSB_STRP2           | -----                                                              | 109 |

**Figure S16.** Protein sequence alignment of GpsB indicates conserved phosphorylation sites. Phosphosites that have been identified as targets of the respective PASTA kinases in *E. faecalis* (ENTFA) [50], *B. subtilis* (BACSU) [65], *S. suis* (STRS4) [46], and *S. pneumoniae* (STRP2) [44] are highlighted in green. T66 and T86 of *S. pyogenes* (STRPZ), which were more strongly phosphorylated during growth than in the stationary phase, are highlighted in red. Other phosphorylation sites of the GpsB protein of *S. pyogenes* found in our analysis are highlighted in turquoise.
