# Supplementary material for: Dynamic Protein Phosphorylation in Streptococcus pyogenes during Growth, Stationary Phase, and Starvation
Source: Microorganisms. 2024 Mar 20;12(3):621. doi: 10.3390/microorganisms12030621 (PMC10975399; doi:10.3390/microorganisms12030621)
Supplement: Supplementary file 1 [file microorganisms-12-00621-s001.zip]

Archive with 7 entries (7 files):
- Supplementary  Table S1.xlsx
- Supplementary  Table S2.xlsx
- Supplementary  Table S3.xlsx
- Supplementary  Table S4.xlsx
- Supplementary  Table S5.xlsx
- Supplementary Data Sheet S1.pdf
- Supplementary Figures S1-S16.pdf
