# Supplementary material for: Dynamic Protein Phosphorylation in Streptococcus pyogenes during Growth, Stationary Phase, and Starvation
Source: Microorganisms. 2024 Mar 20;12(3):621. doi: 10.3390/microorganisms12030621 (PMC10975399; doi:10.3390/microorganisms12030621)
Supplement: Supplementary file 1 [file microorganisms-12-00621-s001.zip › Supplementary Table S1.xlsx]

## Sheet: Legend
Label-free quantification of the proteome
The results are given as fmol per column for each individual MS run and for the mean values of the technical replicates.
Column heading	Description
UniProt Acc. No.	UniProtKB Accession of the protein
Peptide count	Number of peptide sequences assigned to the protein
Unique peptides	Number of unique peptide sequences assigned to the protein
Confidence score	Protein score, which is the sum of the peptide scores in the ion accounting algorithm
Anova (p)	p-value of ANOVA test
Max fold change	Abundance difference between the samples (mean values) with the lowest and highest protein amount
Mass	Mass of the protein
Protein name	Name of the protein containing the phosphorylation site

## Sheet: Exp 1
								Amount (fmol) on column																														Mean values
								THY 0.8			THY ME			THY exp			THY stat			CDMF ME			CDMF exp			CDMF stat			CDM- ME			CDM- exp			CDM- stat
UniProt Acc. No.	Peptide count	Unique peptides	Confidence score	Anova (p)	Max fold change	Mass	Protein name	05032021_Spy_1_THY08_HDMSe_03	05032021_Spy_1_THY08_HDMSe_04	05032021_Spy_1_THY08_HDMSe_02	05032021_Spy_2_THY15_HDMSe_02	05032021_Spy_2_THY15_HDMSe_03	05032021_Spy_2_THY15_HDMSe_01	05032021_Spy_3_THYexpo_HDMSe_02	05032021_Spy_3_THYexpo_HDMSe_03	05032021_Spy_3_THYexpo_HDMSe_01	05032021_Spy_4_THYstat_HDMSe_02	05032021_Spy_4_THYstat_HDMSe_03	05032021_Spy_4_THYstat_HDMSe_01	05032021_Spy_5_Fru15_HDMSe_02	05032021_Spy_5_Fru15_HDMSe_03	05032021_Spy_5_Fru15_HDMSe_01	05032021_Spy_6_Fruexpo_HDMSe_02	05032021_Spy_6_Fruexpo_HDMSe_03	05032021_Spy_6_Fruexpo_HDMSe_01	05032021_Spy_7_Frustat_HDMSe_02	05032021_Spy_7_Frustat_HDMSe_03	05032021_Spy_7_Frustat_HDMSe_01	05032021_Spy_8_CDM15_HDMSe_02	05032021_Spy_8_CDM15_HDMSe_03	05032021_Spy_8_CDM15_HDMSe_01	05032021_Spy_9_CDMexpo_HDMSe_02	05032021_Spy_9_CDMexpo_HDMSe_03	05032021_Spy_9_CDMexpo_HDMSe_01	05032021_Spy_10_CDMstat_HDMSe_02	05032021_Spy_10_CDMstat_HDMSe_03	05032021_Spy_10_CDMstat_HDMSe_01	THY 0.8	THY ME	THY exp	THY stat	CDMF ME	CDMF exp	CDMF stat	CDM- ME	CDM- exp	CDM- stat
A0A0H3C2B6	25	19	185.724	1.82823e-07	1.59037	83881.1	(p)ppGpp synthase OS=Streptococcus pyogenes serotype M49 (strain NZ131) OX=471876 GN=relA PE=3 SV=1	2.70455	3.18734	2.61047	3.52722	3.89647	3.16781	2.70322	2.75145	2.50749	2.68022	2.65068	2.39202	2.3961	2.47726	2.15668	2.20023	2.30673	2.15282	2.82235	3.00759	2.74632	2.88956	3.15161	2.82761	3.55646	3.71334	3.29973	3.3499	3.64181	3.24838	2.83412	3.5305	2.65405	2.5743	2.34335	2.21993	2.85875	2.95626	3.52318	3.41336
A0A0H3C077	11	7	91.5708	3.25327e-07	2.60648	39649.3	[Citrate [pro-3S]-lyase] ligase OS=Streptococcus pyogenes serotype M49 (strain NZ131) OX=471876 GN=citC PE=4 SV=1	0.828201	0.881395	0.757183	0.923535	1.09088	0.821543	1.04909	1.22198	0.878362	1.2899	1.38732	1.11775	0.971929	0.977645	0.895938	0.87154	0.958726	0.912989	0.407361	0.493726	0.618629	0.816921	0.848493	0.80805	0.949007	1.11616	0.925594	1.28816	1.4513	1.22166	0.82226	0.94532	1.04981	1.26499	0.948504	0.914418	0.506572	0.824488	0.99692	1.32037
B5XIW8	10	9	162.404	2.57462e-07	2.49787	10331.7	10 kDa chaperonin OS=Streptococcus pyogenes serotype M49 (strain NZ131) OX=471876 GN=groS PE=3 SV=1	54.8316	48.2197	60.2614	77.4026	64.3043	85.3162	53.2468	44.1404	60.5633	49.0765	38.7306	52.8609	49.9875	37.384	48.6708	35.3031	28.4501	36.4903	34.5868	29.2465	38.1504	71.4664	61.3038	75.1778	88.7343	70.5154	91.1455	84.701	64.2528	89.16	54.4375	75.6743	52.6502	46.8893	45.3474	33.4145	33.9946	69.316	83.4651	79.3712
A0A0H3BZQ8	11	11	93.7153	1.27181e-08	1.90695	49840.9	16S rRNA m5C967 methyltransferase OS=Streptococcus pyogenes serotype M49 (strain NZ131) OX=471876 GN=sunL PE=3 SV=1	1.23059	1.38698	1.15424	0.89945	0.908004	0.854762	1.42531	1.41963	1.21649	1.70829	1.77969	1.58874	1.34498	1.37806	1.21063	1.30078	1.31455	1.16535	1.27704	1.42679	1.20627	1.22574	1.24639	1.13564	0.971142	0.981061	0.961975	1.06716	1.10999	1.08509	1.25727	0.887405	1.35381	1.69224	1.31122	1.26023	1.30336	1.20259	0.971393	1.08741
A0A0H3BXW8	6	6	50.2894	2.09198e-06	1.59982	28242.2	1-acyl-sn-glycerol-3-phosphate acyltransferase OS=Streptococcus pyogenes serotype M49 (strain NZ131) OX=471876 GN=Spy49_1127c PE=4 SV=1	0.719275	0.664683	0.763051	0.691056	0.603317	0.641577	0.710387	0.621591	0.711659	0.697277	0.58867	0.64005	0.743989	0.599663	0.662188	0.883363	0.76147	0.815487	1.01708	0.96433	1.08509	0.657617	0.610883	0.648279	0.661618	0.584608	0.690034	0.73326	0.657789	0.807602	0.71567	0.645317	0.681212	0.641999	0.668613	0.820106	1.02217	0.638927	0.64542	0.732884
B5XM69	17	17	230.129	9.63427e-06	1.42283	26036.5	2_3-bisphosphoglycerate-dependent phosphoglycerate mutase OS=Streptococcus pyogenes serotype M49 (strain NZ131) OX=471876 GN=gpmA PE=3 SV=1	62.3233	70.7681	69.4286	66.112	72.1012	74.8627	64.1226	64.9015	72.0338	56.5717	59.3052	66.3088	60.8186	62.2501	67.1547	74.3332	76.878	82.6285	81.8115	90.8393	86.5678	65.6439	63.8144	67.333	67.73	69.7788	68.4935	68.5657	68.1715	73.4318	67.5067	71.0253	67.0193	60.7286	63.4078	77.9466	86.4062	65.5971	68.6674	70.0563
A0A0H3BZU1	17	15	191.849	0	3.32208	31213.4	2_5-diketo-D-gluconic acid reductase OS=Streptococcus pyogenes serotype M49 (strain NZ131) OX=471876 GN=Spy49_1313c PE=4 SV=1	2.88081	3.33047	2.78675	2.91678	3.3735	3.12753	4.14271	4.29781	4.22482	9.03123	9.95494	9.39319	5.23089	5.60381	5.23187	2.85182	2.90843	2.78241	3.45081	3.66932	3.32906	5.2699	5.16135	5.15161	4.45286	4.70501	4.49954	6.4919	6.45597	6.49551	2.99934	3.13927	4.22178	9.45979	5.35552	2.84755	3.48306	5.19429	4.55247	6.48113
A0A0H3C288	10	8	86.2053	0.000448592	1.6608	27134	23S rRNA methyltransferase OS=Streptococcus pyogenes serotype M49 (strain NZ131) OX=471876 GN=Spy49_1601c PE=4 SV=1	1.5382	1.474	1.76127	1.71841	1.58256	2.02174	1.69905	1.54183	1.98009	1.58111	1.57077	1.94226	1.80218	1.48466	1.93483	2.38068	1.94732	2.58727	2.57118	2.25986	2.87397	1.77868	1.4731	1.8351	1.71365	1.52574	1.71863	1.54389	1.38092	1.71452	1.59116	1.77424	1.74032	1.69805	1.74056	2.30509	2.56834	1.69562	1.65267	1.54644
A0A0H3C0H8	5	4	46.3099	0.0386686	1.59597	18870.5	2-amino-4-hydroxy-6-hydroxymethyldihydropteridine pyrophosphokinase OS=Streptococcus pyogenes serotype M49 (strain NZ131) OX=471876 GN=folK PE=4 SV=1	2.06735	1.84861	2.44741	2.72214	2.21407	2.96954	2.47485	2.37641	3.06164	2.97154	2.6	3.46102	2.75273	2.1403	3.22326	3.38478	3.05803	3.71295	2.38433	2.13547	2.94978	2.52448	2.26203	2.5142	2.51009	2.44675	2.86432	3.09877	2.48633	3.43384	2.12112	2.63525	2.63763	3.01085	2.70543	3.38525	2.48986	2.43357	2.60706	3.00631
A0A0H3BWR6	27	24	369.325	0.0750548	1.25556	34184.1	2-dehydropantoate 2-reductase OS=Streptococcus pyogenes serotype M49 (strain NZ131) OX=471876 GN=apbA PE=3 SV=1	35.3218	39.8325	41.8875	35.5583	36.4503	42.143	35.4736	35.1118	40.5993	33.4611	33.524	39.6517	37.4776	34.2	40.1684	45.3122	42.3659	46.211	36.039	40.1416	35.5904	38.1559	34.6703	40.3516	39.4831	37.1433	41.7027	42.2858	37.8928	46.0953	39.0139	38.0505	37.0616	35.5456	37.282	44.6297	37.257	37.7259	39.4431	42.0913
B5XJ35	9	9	107.739	0.0518509	1.33398	11613.6	30S ribosomal protein S10 OS=Streptococcus pyogenes serotype M49 (strain NZ131) OX=471876 GN=rpsJ PE=3 SV=1	70.1799	62.187	76.5245	65.8632	60.0681	72.9315	60.7719	53.6033	66.6436	55.3242	47.0539	62.2221	67.4242	57.9433	69.1417	73.2766	65.585	80.7111	69.1492	66.4638	80.1892	71.4577	66.3566	75.3006	66.6073	59.3814	70.4064	62.9921	55.3181	68.0029	69.6304	66.2876	60.3396	54.8667	64.8364	73.1909	71.934	71.0383	65.465	62.1044
B5XJ61	5	5	59.1023	0.340588	1.53981	13429.5	30S ribosomal protein S11 OS=Streptococcus pyogenes serotype M49 (strain NZ131) OX=471876 GN=rpsK PE=3 SV=1	28.6783	24.244	34.2369	27.1186	21.6517	31.9377	24.8467	18.6161	29.7248	21.0472	17.352	26.7391	30.7166	21.4298	32.7566	34.1179	23.8246	37.302	31.999	26.1713	42.1307	31.8046	25.1977	34.832	28.5786	21.6372	31.6306	26.3522	18.7738	27.2092	29.0531	26.9027	24.3959	21.7128	28.301	31.7481	33.4337	30.6114	27.2821	24.1117
A0A0H3BXD5	10	10	123.767	0.0225916	1.61448	17262.1	30S ribosomal protein S12 OS=Streptococcus pyogenes serotype M49 (strain NZ131) OX=471876 GN=rpsL PE=3 SV=1	21.8946	20.2662	27.6501	20.9937	18.5904	25.1636	17.653	15.4847	22.5833	15.6235	14.343	19.0504	23.6963	18.2911	23.9123	25.3662	21.2205	30.6334	25.7113	21.2452	32.1804	22.9969	17.8367	25.3909	20.1527	15.3493	20.7532	17.4114	14.89	18.1768	23.2703	21.5826	18.5737	16.339	21.9666	25.7401	26.379	22.0748	18.7517	16.8261
B5XJ60	19	15	276.287	0.00450176	1.36678	13425.7	30S ribosomal protein S13 OS=Streptococcus pyogenes serotype M49 (strain NZ131) OX=471876 GN=rpsM PE=3 SV=1	30.8226	29.7754	34.2265	32.6952	32.8944	33.9981	28.7005	27.6972	32.3894	25.0155	25.393	30.9231	30.4018	29.3297	31.9974	33.0241	29.78	34.597	36.0823	35.1212	39.9592	33.7351	30.2662	35.0802	32.1735	29.3481	33.1034	31.9071	29.2217	30.8451	31.6082	33.1959	29.5957	27.1105	30.5763	32.4671	37.0542	33.0272	31.5417	30.658
B5XIK9	8	8	126.358	1.07218e-07	1.36298	10504.1	30S ribosomal protein S15 OS=Streptococcus pyogenes serotype M49 (strain NZ131) OX=471876 GN=rpsO PE=3 SV=1	30.9138	33.3265	32.4015	34.2417	31.9407	31.9445	29.3048	27.2122	28.6591	25.3562	25.4177	24.3135	30.1514	27.5936	29.1013	35.4125	32.8148	34.1152	31.7446	30.0496	32.6107	32.5376	31.6561	32.5178	33.4983	30.1922	32.2419	29.098	29.8208	30.4931	32.214	32.709	28.392	25.0291	28.9488	34.1142	31.4683	32.2372	31.9774	29.804
B5XKW7	7	6	77.3254	0.000687756	1.40551	10251.9	30S ribosomal protein S16 OS=Streptococcus pyogenes serotype M49 (strain NZ131) OX=471876 GN=rpsP PE=3 SV=1	29.5761	33.619	35.5193	30.1752	35.5084	38.5588	28.0927	31.1763	34.4906	24.9572	24.708	28.0193	28.924	30.3394	35.7019	34.296	34.0564	39.9145	24.0519	27.4382	27.3652	32.726	30.286	34.2188	29.4486	28.5601	32.6422	25.3072	23.9233	27.8001	32.9048	34.7475	31.2532	25.8948	31.6551	36.089	26.2851	32.4103	30.217	25.6768
B5XJ45	8	8	115.605	0.0719785	1.14936	10089.8	30S ribosomal protein S17 OS=Streptococcus pyogenes serotype M49 (strain NZ131) OX=471876 GN=rpsQ PE=3 SV=1	26.7031	28.9318	26.378	26.594	29.7455	24.8241	26.0141	26.5112	23.4505	24.2031	25.0892	22.0633	25.3719	26.1183	23.9449	24.6053	26.1764	26.6006	24.6382	28.7406	27.9053	26.7143	26.6045	26.7851	25.7348	26.9312	24.4076	23.9692	24.9028	23.0138	27.3377	27.0546	25.3253	23.7852	25.1451	25.7941	27.0947	26.7013	25.6912	23.9619
B5XI38	12	11	188.971	1.09252e-05	1.41437	9199.79	30S ribosomal protein S18 OS=Streptococcus pyogenes serotype M49 (strain NZ131) OX=471876 GN=rpsR PE=3 SV=1	22.7985	27.6399	23.8893	23.4747	27.2476	25.4553	22.1082	24.0044	22.2614	18.7664	21.1595	20.3269	21.969	24.5638	23.6027	24.7151	25.708	24.557	26.9623	29.3911	28.1065	24.6818	24.7823	25.5122	23.3565	24.6811	23.4794	18.2608	20.7275	20.7274	24.7759	25.3925	22.7913	20.0842	23.3785	24.9934	28.1533	24.9921	23.839	19.9052
B5XJ40	7	6	103.046	0.0893615	1.43334	10659.4	30S ribosomal protein S19 OS=Streptococcus pyogenes serotype M49 (strain NZ131) OX=471876 GN=rpsS PE=3 SV=1	35.3921	31.9793	39.7436	34.1943	29.7629	35.7352	30.8373	26.9291	35.4035	29.496	25.635	33.7051	35.4326	28.4934	36.2842	35.6197	28.257	37.6756	24.4551	22.834	27.4421	36.1424	29.5582	39.2741	33.1914	27.9701	36.8071	32.7601	26.3735	31.1689	35.705	33.2308	31.0567	29.612	33.4034	33.8508	24.9104	34.9916	32.6562	30.1008
B5XIY5	31	26	457.732	6.44142e-05	1.22695	28503.7	30S ribosomal protein S2 OS=Streptococcus pyogenes serotype M49 (strain NZ131) OX=471876 GN=rpsB PE=3 SV=1	63.1591	64.0049	65.1063	63.3851	62.1283	63.1783	55.9447	53.9808	57.2944	54.3025	50.1689	55.8594	59.7429	57.247	58.6404	67.2398	62.0004	67.4778	59.1796	58.0352	62.479	64.8187	61.638	66.0343	62.4009	57.835	65.1012	63.9673	59.1852	66.4594	64.0901	62.8972	55.74	53.4436	58.5434	65.5726	59.898	64.1637	61.779	63.204
B5XKR6	4	4	39.941	2.27467e-10	1.93764	6988.2	30S ribosomal protein S21 OS=Streptococcus pyogenes serotype M49 (strain NZ131) OX=471876 GN=rpsU PE=3 SV=1	4.12361	4.19775	3.74093	3.66652	3.75572	3.54235	3.31925	3.44367	2.94267	2.95667	3.22664	2.74846	4.09249	4.07938	3.7014	4.14848	4.16872	4.21469	4.04481	4.08788	4.25465	3.43257	3.44883	4.01164	3.418	3.33398	3.30946	2.16333	2.28301	2.02125	4.02076	3.65486	3.2352	2.97726	3.95776	4.1773	4.12911	3.63101	3.35381	2.15586
A0A0H3BYQ3	13	12	233.706	0.0242959	1.30053	23185.6	30S ribosomal protein S3 OS=Streptococcus pyogenes serotype M49 (strain NZ131) OX=471876 GN=rpsC PE=3 SV=1	76.7905	70.6715	81.6733	72.9128	66.116	77.9739	63.4302	57.8298	69.5293	63.8977	57.0892	69.3128	74.0121	64.76	75.2023	85.4577	72.5981	89.4337	78.9653	72.9205	86.5544	78.1737	71.6245	80.6206	74.1205	67.3925	76.599	74.9646	63.2906	78.6812	76.3785	72.3342	63.5964	63.4332	71.3248	82.4965	79.4801	76.8063	72.704	72.3121
B5XJ99	20	20	306.766	1.41394e-09	1.34431	23073.6	30S ribosomal protein S4 OS=Streptococcus pyogenes serotype M49 (strain NZ131) OX=471876 GN=rpsD PE=3 SV=1	59.0463	57.4821	60.0461	53.4441	56.1541	52.4463	48.4269	48.9158	47.5359	45.3656	45.7454	44.5269	54.0491	50.2782	51.7986	60.9056	56.7698	58.3263	58.8182	62.1886	61.3322	54.2977	52.2318	55.2199	52.8108	51.0953	54.1029	51.851	47.69	48.4164	58.8582	54.0149	48.2929	45.2126	52.042	58.6673	60.7797	53.9165	52.6697	49.3191
A0A0H3BVE1	19	19	245.347	0.0268923	1.33669	16925.7	30S ribosomal protein S5 OS=Streptococcus pyogenes serotype M49 (strain NZ131) OX=471876 GN=rpsE PE=3 SV=1	80.5057	75.9646	87.1575	81.7949	73.4767	88.7355	68.3222	62.554	78.1723	63.7106	54.7669	71.191	73.9399	65.8261	79.3334	82.9128	75.157	89.3027	83.1783	72.2043	89.2435	85.694	77.6637	90.1697	85.2678	73.1366	89.8032	79.7299	72.1447	86.4777	81.2093	81.3357	69.6828	63.2228	73.0331	82.4575	81.5421	84.5091	82.7359	79.4507
B5XI40	7	7	113.522	0.0829344	1.45317	11081.6	30S ribosomal protein S6 OS=Streptococcus pyogenes serotype M49 (strain NZ131) OX=471876 GN=rpsF PE=3 SV=1	45.9242	45.0191	52.1565	47.8953	42.6373	55.7976	43.8238	38.8927	51.7487	38.0679	36.5348	47.333	48.4872	40.097	53.6211	60.0673	47.973	63.527	57.0357	51.0884	69.0696	50.5142	44.0596	54.8308	48.3833	41.3122	52.2039	49.9907	45.0399	54.8673	47.6999	48.7767	44.8217	40.6452	47.4018	57.1891	59.0646	49.8015	47.2998	49.966
B5XJR0	18	17	220.243	9.7174e-06	1.28131	17652.3	30S ribosomal protein S7 OS=Streptococcus pyogenes serotype M49 (strain NZ131) OX=471876 GN=rpsG PE=3 SV=1	69.0793	74.7043	74.9337	67.9571	76.173	67.2148	62.4537	65.2694	63.0043	59.1242	61.7651	58.2266	68.0631	69.251	68.7282	77.2691	73.7403	78.4943	69.0561	70.1505	77.1671	71.0387	67.8911	72.4485	68.8669	69.5534	66.622	63.8502	66.5894	62.4351	72.9058	70.4483	63.5758	59.7053	68.6808	76.5012	72.1246	70.4595	68.3475	64.2916
B5XJ50	19	15	294.95	0.0160608	1.33039	14788.3	30S ribosomal protein S8 OS=Streptococcus pyogenes serotype M49 (strain NZ131) OX=471876 GN=rpsH PE=3 SV=1	89.353	93.492	81.6049	92.6544	101.632	76.8171	77.2525	89.0767	70.4078	73.7418	74.5762	61.8323	83.1131	86.1485	76.5286	91.0892	100.182	83.7782	81.1689	89.0273	76.8743	82.0918	90.439	81.1766	88.355	96.1223	88.5987	91.9749	97.1038	90.5022	88.15	90.3677	78.9123	70.0501	81.9301	91.6832	82.3568	84.5692	91.0253	93.1936
B5XIJ1	6	6	80.4939	0.229436	1.446	14235.4	30S ribosomal protein S9 OS=Streptococcus pyogenes serotype M49 (strain NZ131) OX=471876 GN=rpsI PE=3 SV=1	12.5381	12.6704	15.5171	12.4941	11.922	13.1738	11.8103	10.7781	13.7328	10.6286	10.5066	13.4337	14.613	10.7278	14.2133	17.3725	12.8959	17.1717	13.3317	13.0785	17.6081	14.5425	10.5132	15.4715	13.3717	10.5659	14.66	11.8706	8.71609	12.2212	13.5752	12.53	12.1071	11.5229	13.1847	15.8134	14.6728	13.5091	12.8659	10.936
B5XJE9	14	12	134.378	1.03228e-06	1.66102	31778.8	33 kDa chaperonin OS=Streptococcus pyogenes serotype M49 (strain NZ131) OX=471876 GN=hslO PE=3 SV=1	8.42818	8.80433	8.91104	8.82312	10.9704	9.83797	8.20559	8.82836	9.28914	7.12405	7.97786	7.29056	8.4052	9.25008	8.90884	10.8497	10.3242	11.0812	11.4849	12.1516	13.5579	9.41165	9.02446	9.44304	9.51246	10.3474	9.29994	9.76328	10.9458	9.38426	8.71452	9.87717	8.77437	7.46416	8.85471	10.7517	12.3981	9.29305	9.71993	10.0311
B5XKU3	8	7	90.4002	5.49542e-06	1.40284	26100.9	3-dehydroquinate dehydratase OS=Streptococcus pyogenes serotype M49 (strain NZ131) OX=471876 GN=aroD PE=3 SV=1	2.04241	2.23	2.08372	2.11472	2.16332	1.93845	2.21468	2.31826	2.08748	2.06016	2.16903	1.95798	1.87279	1.92504	1.73803	2.24877	2.40417	2.23983	2.65157	2.66144	2.45293	2.05888	2.16293	1.95263	2.02721	2.02152	1.85837	2.00546	2.11006	2.10343	2.11871	2.07216	2.20681	2.06239	1.84529	2.29759	2.58865	2.05815	1.96903	2.07298
B5XME6	7	5	53.5741	3.29899e-06	1.73893	40527.3	3-dehydroquinate synthase OS=Streptococcus pyogenes serotype M49 (strain NZ131) OX=471876 GN=aroB PE=3 SV=1	0.52317	0.603453	0.493696	0.409343	0.486524	0.351526	0.464456	0.485878	0.38235	0.589762	0.634128	0.555158	0.554482	0.554534	0.478478	0.63909	0.691413	0.59878	0.714987	0.795257	0.658891	0.486292	0.521749	0.444114	0.392361	0.473637	0.401559	0.495745	0.486366	0.445846	0.540106	0.415798	0.444228	0.593016	0.529165	0.643095	0.723045	0.484052	0.422519	0.475986
A0A0H3BXV1	9	9	97.4295	5.75029e-06	1.67483	46389.7	3-hydroxy-3-methylglutaryl coenzyme A reductase OS=Streptococcus pyogenes serotype M49 (strain NZ131) OX=471876 GN=mvaS1 PE=3 SV=1	0.988518	1.19116	1.01786	1.05829	1.30658	1.06124	1.36149	1.46267	1.19965	1.27584	1.33366	1.15887	1.16509	1.31705	1.05146	1.4535	1.55892	1.35866	1.5761	1.74072	1.5316	0.94585	1.07753	0.871489	0.934084	1.05496	0.93238	1.33371	1.49185	1.3186	1.06584	1.14204	1.34127	1.25613	1.17787	1.45703	1.61614	0.964956	0.973807	1.38139
B5XHX8	8	6	89.5588	0	3.92829	15512.2	3-hydroxyacyl-[acyl-carrier-protein] dehydratase FabZ OS=Streptococcus pyogenes serotype M49 (strain NZ131) OX=471876 GN=fabZ PE=3 SV=1	6.6656	6.14558	6.87504	3.65721	3.27314	3.53892	5.313	4.80435	5.39866	4.97267	4.46132	4.75442	7.85037	7.70053	8.25924	13.4281	12.4347	13.9573	13.8782	12.8443	14.4038	5.42542	5.5891	5.54099	4.21605	4.08921	4.31112	4.10222	3.98502	4.18239	6.56207	3.48976	5.17201	4.72947	7.93671	13.2734	13.7088	5.5185	4.20546	4.08987
A0A0H3C129	20	17	296.553	5.88418e-15	3.24961	25987.1	3-oxoacyl-[acyl-carrier-protein] reductase OS=Streptococcus pyogenes serotype M49 (strain NZ131) OX=471876 GN=fabG PE=3 SV=1	24.5274	26.8737	24.6935	12.9234	14.5964	12.0189	19.7994	22.1195	17.9561	18.766	19.0408	16.9431	34.1758	33.7655	29.8531	42.7621	44.5679	41.155	38.0218	39.167	38.5234	21.2916	20.969	19.0067	16.6455	17.8782	16.4572	18.8946	19.496	18.9849	25.3648	13.1795	19.9584	18.25	32.5981	42.8284	38.5708	20.4224	16.9936	19.1252
A0A0H3BZY3	31	26	412.128	6.85185e-12	4.87956	43893.7	3-oxoacyl-[acyl-carrier-protein] synthase 2 OS=Streptococcus pyogenes serotype M49 (strain NZ131) OX=471876 GN=fabF PE=3 SV=1	19.7821	18.6463	22.9927	9.08215	8.5352	10.8244	15.7886	14.9624	19.2124	15.1797	13.1797	17.8765	26.966	22.4439	27.4253	43.2216	35.5555	45.3654	45.4445	42.5261	50.8126	17.5717	14.8384	18.4824	12.9432	11.0169	13.8266	13.9153	10.9025	14.2088	20.4737	9.48057	16.6545	15.412	25.6118	41.3809	46.261	16.9642	12.5956	13.0089
B5XHY5	15	12	143.521	3.6785e-12	2.42557	35015.3	3-oxoacyl-[acyl-carrier-protein] synthase 3 OS=Streptococcus pyogenes serotype M49 (strain NZ131) OX=471876 GN=fabH PE=3 SV=1	4.01625	4.64473	4.26764	2.99791	3.5004	3.13828	3.97449	4.13144	3.5566	3.67	4.25254	3.56984	4.93571	4.90911	4.457	6.52184	7.19665	6.2916	7.61314	8.43106	7.33008	3.77938	3.90564	3.78736	3.8927	3.58409	3.73037	3.96246	4.13144	4.04489	4.30954	3.2122	3.88751	3.83079	4.76727	6.67003	7.79142	3.82413	3.73572	4.04626
B5XM07	12	10	95.1408	0.366405	1.2875	46446.9	3-phosphoshikimate 1-carboxyvinyltransferase OS=Streptococcus pyogenes serotype M49 (strain NZ131) OX=471876 GN=aroA PE=3 SV=1	0.777852	0.864156	0.642651	0.670528	0.793452	0.520073	0.680421	0.710405	0.568364	0.709061	0.694588	0.576145	0.710613	0.750358	0.572062	0.773916	0.862294	0.638485	0.843024	0.974185	0.70524	0.689677	0.777861	0.605836	0.658461	0.739022	0.606375	0.661799	0.716814	0.611023	0.761553	0.661351	0.653063	0.659931	0.677678	0.758232	0.840816	0.691125	0.667953	0.663212
A0A0H3C0W1	15	12	126.862	0	4.21487	57261.4	4-alpha-glucanotransferase OS=Streptococcus pyogenes serotype M49 (strain NZ131) OX=471876 GN=malQ PE=3 SV=1	1.68451	1.75439	1.76692	0.426568	0.388226	0.438281	1.67286	1.79453	1.81416	1.45879	1.45461	1.59024	1.59214	1.54469	1.58866	1.01791	0.914092	1.07072	1.09583	1.05629	1.17182	1.14977	1.18478	1.24083	0.51799	0.458483	0.501428	0.781471	0.768661	0.799711	1.73527	0.417692	1.76052	1.50122	1.57516	1.00091	1.10798	1.19179	0.492634	0.783281
B5XK62	25	16	298.456	0.0315895	1.35162	24394.2	50S ribosomal protein L1 OS=Streptococcus pyogenes serotype M49 (strain NZ131) OX=471876 GN=rplA PE=3 SV=1	55.6669	58.5337	65.5989	57.6693	61.1521	68.293	52.8216	51.3365	61.5173	49.2088	48.0955	57.6777	54.3443	55.0491	58.968	63.6616	56.0659	68.0561	66.3982	65.529	77.5495	63.3591	54.7566	64.878	63.4955	54.7621	66.4724	60.8377	57.0811	63.4264	59.9332	62.3715	55.2251	51.6606	56.1205	62.5945	69.8256	60.9979	61.5767	60.4484
B5XLE2	20	20	302.324	0.0014251	1.85923	17551.3	50S ribosomal protein L10 OS=Streptococcus pyogenes serotype M49 (strain NZ131) OX=471876 GN=rplJ PE=3 SV=1	47.0007	43.05	53.5061	48.1338	43.3207	54.312	41.7493	34.8557	47.27	32.4136	30.0523	39.5981	44.5292	36.756	47.1524	51	42.6695	55.7824	63.954	53.9982	71.8086	50.9791	42.8305	52.5064	50.5629	43.4729	52.1105	43.6204	37.2644	46.0053	47.8523	48.5888	41.2917	34.0213	42.8126	49.8173	63.2536	48.772	48.7155	42.2967
B5XK61	14	11	169.491	2.05724e-08	1.4452	14801.3	50S ribosomal protein L11 OS=Streptococcus pyogenes serotype M49 (strain NZ131) OX=471876 GN=rplK PE=3 SV=1	65.3653	66.2447	66.2689	59.8434	61.0013	58.144	57.8747	55.8777	57.4693	52.0732	46.8815	50.9073	64.9376	56.8092	60.5773	65.8836	62.6299	67.8544	54.9684	55.5351	58.3216	65.028	62.2677	63.7693	57.8372	54.095	58.2253	47.4044	41.6369	47.8804	65.9596	59.6629	57.0739	49.954	60.7747	65.4559	56.275	63.6884	56.7192	45.6405
A0A0H3C281	18	17	244.635	2.73181e-05	1.44873	16130.8	50S ribosomal protein L13 OS=Streptococcus pyogenes serotype M49 (strain NZ131) OX=471876 GN=rplM PE=3 SV=1	61.4108	70.4324	59.199	64.5042	71.3757	61.4126	59.7758	66.1474	57.2524	58.6463	61.2035	58.8724	60.8927	64.8946	57.3591	60.0732	60.9806	57.4988	45.1969	50.4583	47.3132	60.0212	65.1926	59.0042	61.9392	65.1178	61.2211	68.7796	69.0206	69.323	63.6808	65.7642	61.0586	59.5741	61.0488	59.5175	47.6561	61.406	62.7594	69.0411
B5XJ46	10	10	147.184	1.11787e-05	1.42319	13061.2	50S ribosomal protein L14 OS=Streptococcus pyogenes serotype M49 (strain NZ131) OX=471876 GN=rplN PE=3 SV=1	51.5281	58.7233	50.2516	51.8842	55.5438	49.252	46.5554	50.1594	44.6438	40.0382	41.1559	36.5692	47.9875	49.4111	45.0662	53.0722	54.0649	48.5351	55.6291	59.9537	52.0163	49.9007	49.7811	47.9671	47.9954	48.8704	49.1484	44.9711	45.1058	46.5095	53.501	52.2267	47.1195	39.2544	47.4883	51.8907	55.8664	49.2163	48.6714	45.5288
B5XJ55	9	9	153.901	9.9052e-11	2.18339	15420.7	50S ribosomal protein L15 OS=Streptococcus pyogenes serotype M49 (strain NZ131) OX=471876 GN=rplO PE=3 SV=1	35.9636	43.4496	38.5007	35.7248	43.0721	38.2291	34.7195	38.2379	35.7318	31.0556	34.1869	32.2927	37.3546	40.1458	38.7072	44.8689	47.7907	44.3694	36.1718	42.2767	39.0318	38.0497	37.0508	37.967	34.5675	35.656	36.7108	20.7603	21.3577	20.6415	39.3046	39.0087	36.2297	32.5117	38.7359	45.6763	39.1601	37.6892	35.6448	20.9199
B5XJ43	8	6	113.15	9.28811e-11	1.90663	15509.3	50S ribosomal protein L16 OS=Streptococcus pyogenes serotype M49 (strain NZ131) OX=471876 GN=rplP PE=3 SV=1	26.2465	27.0941	26.4251	28.437	31.2954	31.6534	29.88	30.8634	32.4399	28.6968	28.4074	33.9492	30.6403	30.5121	30.9506	24.7687	25.0022	25.8297	20.3682	21.4538	20.8362	29.1777	27.9782	30.1053	30.4601	31.6601	32.3019	38.86	38.3923	42.2135	26.5886	30.4619	31.0611	30.3511	30.701	25.2002	20.8861	29.0871	31.4741	39.822
B5XJ63	11	11	136.766	0.0138466	1.17725	14491.6	50S ribosomal protein L17 OS=Streptococcus pyogenes serotype M49 (strain NZ131) OX=471876 GN=rplQ PE=3 SV=1	56.0209	60.6368	59.6439	61.0602	63.7323	56.2243	51.4253	61.6112	54.3601	48.7437	54.1857	52.8679	57.1326	59.371	57.2263	57.8378	61.4099	59.5592	48.8493	55.2615	53.5838	63.1103	60.3424	59.9591	50.1948	58.2845	59.6982	52.0545	54.0365	53.5139	58.7672	60.3389	55.7989	51.9325	57.91	59.6023	52.5649	61.1373	56.0591	53.2016
B5XJ52	7	5	108.78	7.63191e-06	1.31215	12865.8	50S ribosomal protein L18 OS=Streptococcus pyogenes serotype M49 (strain NZ131) OX=471876 GN=rplR PE=3 SV=1	19.6213	19.2361	19.7672	20.7826	22.2517	19.9185	17.0664	17.1529	17.4769	16.0674	16.6342	15.275	18.1322	17.7216	16.8746	18.3867	16.9015	18.1728	19.3906	20.2944	22.5756	20.0055	18.4665	20.3793	22.3116	19.0094	20.9921	17.9122	16.42	17.3817	19.5415	20.9843	17.2321	15.9922	17.5762	17.8203	20.7535	19.6171	20.771	17.238
B5XKM2	15	14	197.099	3.31522e-06	1.55482	13131.4	50S ribosomal protein L19 OS=Streptococcus pyogenes serotype M49 (strain NZ131) OX=471876 GN=rplS PE=3 SV=1	54.6963	61.6904	59.2222	52.0844	56.2884	58.8005	51.4519	52.9384	56.216	50.874	50.7864	54.5112	58.7596	53.4552	58.8232	58.8987	56.1619	62.8627	60.9233	64.5767	66.1518	58.4403	52.4743	60.4189	53.5477	51.1435	58.4756	42.031	37.5865	43.6452	58.5363	55.7244	53.5354	52.0572	57.0127	59.3078	63.8839	57.1112	54.389	41.0876
B5XJ39	22	20	364.382	2.62257e-07	1.24564	29933.5	50S ribosomal protein L2 OS=Streptococcus pyogenes serotype M49 (strain NZ131) OX=471876 GN=rplB PE=3 SV=1	116.483	127.801	116.175	111.247	115.113	117.019	104.499	104.986	100.808	95.6831	94.7075	98.9851	111.003	110.021	112.494	116.159	119.419	123.377	113.733	118.747	111.166	109.152	111.02	111.144	103.831	105.522	103.486	102.841	101.777	110.777	120.153	114.459	103.431	96.4585	111.172	119.651	114.549	110.439	104.28	105.132
B5XKU0	16	16	211.116	0.290583	1.33688	13622.2	50S ribosomal protein L20 OS=Streptococcus pyogenes serotype M49 (strain NZ131) OX=471876 GN=rplT PE=3 SV=1	35.1563	45.7233	36.3492	38.2095	47.1625	32.8344	36.9568	46.0968	30.9404	39.0811	42.9157	34.2135	40.2934	44.1321	33.9169	42.2763	47.4832	39.0198	30.8008	35.0552	30.4719	36.2338	39.5974	34.7665	37.4022	44.4959	39.3241	42.1795	44.7052	41.2988	39.0763	39.4021	37.998	38.7368	39.4474	42.9264	32.1093	36.8659	40.4074	42.7278
B5XKV2	4	4	64.4001	0.163003	1.71761	11155	50S ribosomal protein L21 OS=Streptococcus pyogenes serotype M49 (strain NZ131) OX=471876 GN=rplU PE=3 SV=1	39.4155	32.2419	45.2976	34.9634	30.3708	42.0908	32.8963	27.8841	42.8247	28.8485	25.1944	39.1275	40.9926	29.8018	45.0683	43.409	32.2034	50.3516	51.7344	43.0617	65.2342	41.2921	32.8208	44.095	39.1715	31.4933	42.3834	36.4879	28.6703	39.9771	38.985	35.8083	34.535	31.0568	38.6209	41.988	53.3434	39.4026	37.6827	35.0451
B5XJ41	12	10	172.555	0.141085	1.48013	12430.6	50S ribosomal protein L22 OS=Streptococcus pyogenes serotype M49 (strain NZ131) OX=471876 GN=rplV PE=3 SV=1	65.9273	60.0998	77.7064	67.4988	56.5049	81.7193	55.3388	49.6722	73.1051	49.068	39.7973	60.4768	63.1356	52.5042	74.2585	74.3348	61.8755	84.8359	72.7757	60.7681	81.2503	76.2545	62.0131	76.1616	69.0847	55.2698	75.6544	56.5227	44.6145	64.5965	67.9112	68.5744	59.372	49.7807	63.2994	73.6821	71.598	71.4764	66.6696	55.2446
B5XJ47	8	8	115.72	8.12128e-13	2.21201	10916.9	50S ribosomal protein L24 OS=Streptococcus pyogenes serotype M49 (strain NZ131) OX=471876 GN=rplX PE=3 SV=1	50.8844	54.4654	54.7761	49.4461	53.2644	46.289	45.2461	44.0001	41.1967	39.3098	38.5756	36.3427	51.3621	45.2898	45.7242	56.4202	55.494	52.1423	52.5105	55.7001	59.1695	50.6324	45.4021	49.9219	45.7343	44.4525	46.105	26.0674	24.919	24.6826	53.3753	49.6665	43.481	38.076	47.4587	54.6855	55.7934	48.6521	45.4306	25.223
A0A0H3BZK2	8	6	98.4425	1.74475e-06	2.87798	10403.9	50S ribosomal protein L27 OS=Streptococcus pyogenes serotype M49 (strain NZ131) OX=471876 GN=rpmA PE=3 SV=1	40.016	34.9062	46.3676	35.9287	32.1973	41.3165	33.0682	26.1172	38.1933	26.6576	22.1687	31.9867	39.1117	31.2353	42.3424	47.4317	37.6186	51.5454	46.3979	40.0187	53.356	42.8064	35.2381	43.576	31.2864	27.4093	35.5049	17.2674	13.6527	17.6461	40.4299	36.4808	32.4596	26.9377	37.5631	45.5319	46.5909	40.5402	31.4002	16.1887
B5XIF6	2	2	41.2913	1.11022e-16	5.22818	6985.25	50S ribosomal protein L28 OS=Streptococcus pyogenes serotype M49 (strain NZ131) OX=471876 GN=rpmB PE=3 SV=1	18.9775	20.1737	17.9548	16.9501	20.1028	17.1198	15.8268	15.5593	16.1645	14.4248	15.6456	13.2566	18.5171	17.4299	16.5075	22.4269	20.092	23.0801	19.2727	21.3071	21.8936	17.5532	16.0393	18.2675	15.139	15.2949	14.7366	4.19071	4.424	3.93249	19.0353	18.0576	15.8502	14.4423	17.4849	21.8663	20.8245	17.2867	15.0568	4.1824
B5XJ44	10	6	112.041	4.84945e-13	1.96482	7962.32	50S ribosomal protein L29 OS=Streptococcus pyogenes serotype M49 (strain NZ131) OX=471876 GN=rpmC PE=3 SV=1	30.3763	32.759	31.6492	29.8739	33.1359	30.7485	26.9789	27.9704	26.657	23.7155	25.7176	23.3797	28.506	28.8984	27.9867	33.5335	33.9729	36.1219	37.2653	39.0584	42.1137	29.9134	28.6896	30.1847	28.2992	29.878	28.6805	20.2171	20.3991	19.6627	31.5948	31.2528	27.2021	24.2709	28.4637	34.5428	39.4791	29.5959	28.9526	20.093
B5XJ36	14	13	181.969	0.000936461	1.32759	22440.1	50S ribosomal protein L3 OS=Streptococcus pyogenes serotype M49 (strain NZ131) OX=471876 GN=rplC PE=3 SV=1	36.8551	42.7296	37.512	35.5915	44.4631	38.9517	33.8664	35.7501	35.5655	29.2061	32.8607	31.6835	34.6026	37.1291	37.2943	35.7182	41.8654	37.7478	37.507	45.9208	38.1007	36.0729	36.2206	36.9092	34.2686	38.6929	34.1639	29.6314	31.5183	30.3911	39.0322	39.6688	35.0606	31.2501	36.342	38.4438	40.5095	36.4009	35.7085	30.5136
B5XJ54	5	5	87.7416	1.19436e-06	1.78004	6441.66	50S ribosomal protein L30 OS=Streptococcus pyogenes serotype M49 (strain NZ131) OX=471876 GN=rpmD PE=3 SV=1	35.0416	33.4724	37.3219	39.5108	37.808	43.3417	30.8048	28.8234	34.0191	30.4919	27.8016	32.2558	36.2895	30.3298	37.982	32.523	28.3393	31.5885	21.3462	21.9282	24.5109	37.7331	34.1339	41.3883	38.923	36.7864	42.0759	37.0962	33.5583	39.493	35.2786	40.2201	31.2158	30.1831	34.8671	30.8169	22.5951	37.7518	39.2618	36.7159
B5XKL7	5	5	67.1901	1.38837e-08	2.39137	9854.02	50S ribosomal protein L31 type B OS=Streptococcus pyogenes serotype M49 (strain NZ131) OX=471876 GN=rpmE2 PE=3 SV=1	49.3181	48.2475	55.2711	49.7131	47.0047	57.2808	43.535	39.9839	51.4401	35.0973	34.4245	41.1983	50.9876	44.4124	53.9197	59.9639	54.8426	63.2164	53.995	54.028	60.4013	54.1845	46.1423	55.4579	48.2047	43.7508	52.11	25.23	22.5897	26.6242	50.9455	51.3329	44.9863	36.9067	49.7732	59.341	56.1414	51.9282	48.0218	24.8147
A0A0H3C0R2	3	3	32.3992	3.45867e-08	2.34038	5885.72	50S ribosomal protein L33 OS=Streptococcus pyogenes serotype M49 (strain NZ131) OX=471876 GN=rpmG1 PE=3 SV=1	0.914489	0.832778	0.837217	0.948497	1.09496	0.929147	0.7742	0.849454	0.657657	0.461449	0.502492	0.430621	1.028	1.07355	0.908456	1.07089	1.06388	1.12904	0.607718	0.911684	0.844374	0.888126	0.95064	0.946279	1.05964	1.00738	0.939836	0.620518	0.61032	0.609657	0.861495	0.990867	0.760437	0.464854	1.00333	1.08794	0.787925	0.928348	1.00229	0.613498
A0A0H3C214	3	3	45.5644	1.71853e-10	2.89616	5870.83	50S ribosomal protein L33 OS=Streptococcus pyogenes serotype M49 (strain NZ131) OX=471876 GN=rpmG2 PE=3 SV=1	3.33552	3.65682	3.33971	2.92448	3.63576	3.14096	2.65254	2.788	2.53063	2.15807	2.34641	1.89092	2.92406	2.74624	2.93365	3.40557	3.38318	3.61335	3.42941	3.81425	4.48363	3.0054	2.81779	3.37045	2.65542	2.85045	2.39852	1.33093	1.46297	1.25535	3.44402	3.23373	2.65706	2.1318	2.86798	3.46736	3.9091	3.06455	2.6348	1.34975
B5XKT9	5	5	48.7071	0	8.84561	7464.86	50S ribosomal protein L35 OS=Streptococcus pyogenes serotype M49 (strain NZ131) OX=471876 GN=rpmI PE=3 SV=1	6.65556	7.22014	7.1618	5.49419	6.23894	6.40497	5.38573	5.72667	5.95364	4.79942	4.94935	4.82446	6.7083	6.53986	7.23846	7.31378	6.98328	8.03561	5.80337	5.93518	6.07581	6.15084	5.63504	6.322	4.74226	4.56929	4.63203	0.800918	0.845634	0.878166	7.0125	6.04603	5.68868	4.85774	6.82887	7.44422	5.93812	6.03596	4.64786	0.841573
B5XJ37	12	12	171.566	0.0235847	1.24639	22111.4	50S ribosomal protein L4 OS=Streptococcus pyogenes serotype M49 (strain NZ131) OX=471876 GN=rplD PE=3 SV=1	75.4501	80.9555	74.8729	81.518	86.8754	69.3265	70.1453	75.6442	61.249	72.3383	72.4703	64.2197	73.94	73.345	68.1358	72.8274	78.5272	64.2448	79.3848	92.0533	77.1666	75.5459	81.6634	73.8326	75.7897	82.6219	77.6879	87.1561	85.7943	85.1009	77.0928	79.24	69.0128	69.6761	71.8069	71.8665	82.8682	77.014	78.6998	86.0171
B5XJ48	27	25	292.647	0.00250408	1.62365	19829.1	50S ribosomal protein L5 OS=Streptococcus pyogenes serotype M49 (strain NZ131) OX=471876 GN=rplE PE=3 SV=1	85.0299	88.1981	102.816	95.1611	91.6309	110.678	74.9264	75.056	94.7595	66.2048	66.208	79.2653	83.9779	76.6517	94.2707	102.635	88.3916	112.448	112.517	102.361	128.813	99.4844	84.4821	102.757	91.304	81.1127	99.6184	85.9815	75.9517	92.1272	92.0146	99.1567	81.5806	70.5594	84.9668	101.158	114.564	95.5744	90.6784	84.6868
B5XJ51	13	11	209.688	0.0207087	1.47823	19432.3	50S ribosomal protein L6 OS=Streptococcus pyogenes serotype M49 (strain NZ131) OX=471876 GN=rplF PE=3 SV=1	85.7154	70.7037	94.1227	81.5851	64.7683	88.5911	66.4848	55.9429	79.0587	56.2543	46.1956	67.0383	74.3764	60.87	80.1101	84.1537	71.5399	90.3615	83.0135	73.108	91.6523	84.2503	75.3364	89.508	75.7201	64.9512	79.1649	64.2839	54.7274	68.1911	83.5139	78.3149	67.1621	56.496	71.7855	82.0184	82.5913	83.0316	73.2787	62.4008
B5XJA2	14	13	181.293	0.0059668	1.37044	16512.3	50S ribosomal protein L9 OS=Streptococcus pyogenes serotype M49 (strain NZ131) OX=471876 GN=rplI PE=3 SV=1	12.0982	13.2191	13.9832	14.1773	14.7551	16.3264	12.255	11.9301	14.4928	10.8209	10.3163	11.8878	12.2539	11.4787	13.3563	12.8777	11.9173	13.3942	12.0784	12.0096	13.0828	14.0727	12.5871	14.3577	14.5012	12.9848	15.9751	13.1652	11.6713	13.5018	13.1002	15.0863	12.8926	11.0083	12.363	12.7297	12.3902	13.6725	14.4871	12.7794
A0A0H3BW20	7	7	49.1213	0.0024636	1.77745	24829.6	5'-methylthioadenosine/S-adenosylhomocysteine nucleosidase OS=Streptococcus pyogenes serotype M49 (strain NZ131) OX=471876 GN=pfs PE=4 SV=1	0.442958	0.501054	0.569807	0.4992	0.59261	0.790427	0.66033	0.683188	0.936996	0.823052	0.765904	1.10179	0.815191	0.821141	0.8877	0.631336	0.574974	0.737128	0.535186	0.636154	0.689941	0.592732	0.501949	0.642315	0.655644	0.61902	0.766871	0.780661	0.787334	0.851771	0.504607	0.627413	0.760172	0.896914	0.841344	0.647813	0.620427	0.578998	0.680512	0.806588
A0A0H3BZM8	28	22	271.434	1.12467e-05	1.90148	73357.7	5-nucleotidase OS=Streptococcus pyogenes serotype M49 (strain NZ131) OX=471876 GN=Spy49_0686c PE=3 SV=1	3.92615	3.75923	4.53853	3.78552	3.47346	4.08332	3.64678	3.67916	4.32869	2.69622	2.18184	3.15211	4.11139	3.62047	4.49097	4.92926	4.90925	5.41766	5.16915	4.81886	5.2812	4.69551	4.02536	4.75754	4.4098	3.86036	4.45345	3.90275	3.55234	4.33583	4.07464	3.78077	3.88488	2.67672	4.07428	5.08539	5.08974	4.49281	4.24121	3.93031
B5XIW7	55	49	789.128	0	2.09761	57038.5	60 kDa chaperonin OS=Streptococcus pyogenes serotype M49 (strain NZ131) OX=471876 GN=groL PE=3 SV=1	130.152	132.766	129.375	178.929	185.575	174.682	122.414	121.959	117.905	119.289	118.35	125.62	107.063	98.4991	100.554	89.5508	83.4784	84.0186	108.081	108.244	104.698	148.687	147.073	139.214	178.764	173.478	174.964	171.68	167.637	176.83	130.765	179.729	120.759	121.086	102.039	85.6826	107.008	144.991	175.735	172.049
A0A0H3C268	27	25	299.324	4.87048e-11	4.4249	54972.5	6-phospho-beta-galactosidase OS=Streptococcus pyogenes serotype M49 (strain NZ131) OX=471876 GN=lacG PE=3 SV=1	16.4508	14.2812	18.8941	3.60423	3.40847	4.20252	10.2174	8.69091	12.0633	11.9616	9.83781	14.0573	15.2133	12.7608	15.7319	9.13448	7.58737	10.1412	12.2678	10.8848	15.0051	11.9759	10.0148	12.8712	4.39482	3.41491	4.74392	4.59283	3.55745	4.73072	16.5421	3.73841	10.3239	11.9522	14.5687	8.95435	12.7192	11.6206	4.18455	4.29366
A0A0H3C014	6	6	59.5027	1.23111e-06	1.47826	13483.5	7_8-dihydroneopterin aldolase OS=Streptococcus pyogenes serotype M49 (strain NZ131) OX=471876 GN=folQ PE=3 SV=1	1.31984	1.18948	1.45657	2.06135	1.88161	1.81317	1.83471	1.90444	1.99117	1.91903	1.7045	1.89308	1.71364	1.63819	1.63555	1.78992	1.84689	1.62887	1.93513	2.02	1.90748	1.74215	1.63249	1.68993	1.66307	1.6994	1.82445	1.8717	1.87882	1.86779	1.32196	1.91871	1.91011	1.83887	1.66246	1.75523	1.9542	1.68819	1.72897	1.87277
A0A0H3BZH6	4	4	56.6072	3.85206e-11	2.21514	24686.1	ABC transporter ATP-binding protein OS=Streptococcus pyogenes serotype M49 (strain NZ131) OX=471876 GN=Spy49_0601 PE=4 SV=1	0.806686	0.850656	0.760847	1.31924	1.54565	1.42071	1.26029	1.34587	1.2321	1.16797	1.25643	1.16223	1.78225	1.95693	1.61745	1.24414	1.38792	1.2632	1.41596	1.68252	1.37024	0.908605	0.96319	0.906972	0.802773	0.901729	0.836858	0.939538	0.988128	0.938476	0.806063	1.42853	1.27942	1.19554	1.78554	1.29842	1.48957	0.926256	0.84712	0.955381
A0A0H3C0N1	9	7	74.9873	2.09166e-12	4.58778	24997.8	ABC transporter ATP-binding protein OS=Streptococcus pyogenes serotype M49 (strain NZ131) OX=471876 GN=Spy49_1679c PE=4 SV=1	0.288822	0.281602	0.2601	0.64208	0.671772	0.590944	0.61397	0.724545	0.547838	0.58596	0.631779	0.486489	0.292633	0.330287	0.284436	0.21927	0.230582	0.199662	0.145854	0.14967	0.119665	0.309694	0.328599	0.268315	0.384398	0.418866	0.392795	0.508803	0.52846	0.491126	0.276842	0.634932	0.628785	0.568076	0.302452	0.216504	0.138396	0.302203	0.398686	0.509463
A0A0H3BZH8	40	31	486.285	0.319538	1.24911	60191	ABC transporter ATP-binding protein OS=Streptococcus pyogenes serotype M49 (strain NZ131) OX=471876 GN=Spy49_1815 PE=4 SV=1	14.0564	13.7601	15.3862	14.9783	14.954	17.9646	13.4676	13.417	15.7784	11.7746	12.6819	15.8599	14.5266	13.7265	17.1454	14.1669	14.1176	16.0153	13.5073	12.8821	17.0201	15.2628	13.089	15.7671	15.8978	15.1525	16.728	16.3777	15.6463	18.3355	14.4009	15.9656	14.221	13.4388	15.1328	14.7666	14.4698	14.7063	15.9261	16.7865
A0A0H3BX16	3	3	28.0917	1.48881e-13	3.57381	27034.5	ABC transporter OS=Streptococcus pyogenes serotype M49 (strain NZ131) OX=471876 GN=adrC PE=4 SV=1	0.460789	0.431423	0.538592	0.409576	0.391512	0.485204	0.45907	0.542808	0.613962	0.497208	0.568601	0.664362	0.607925	0.56257	0.630929	1.21962	1.18604	1.311	1.09799	1.19311	1.29332	0.468976	0.422947	0.502787	0.33937	0.313888	0.386715	0.397529	0.37511	0.425685	0.476935	0.428764	0.538613	0.576723	0.600475	1.23889	1.19481	0.464903	0.346658	0.399441
A0A0H3BXE2	13	12	105.669	1.47908e-09	1.31875	59497.7	ABC transporter_ ATP-binding protein OS=Streptococcus pyogenes serotype M49 (strain NZ131) OX=471876 GN=Spy49_0952c PE=4 SV=1	1.16112	1.30705	1.20264	0.943398	1.06368	0.985899	1.01192	1.07019	1.05365	0.966845	0.967825	1.04019	1.15703	1.20176	1.15052	1.29181	1.32154	1.27626	1.30166	1.34215	1.24826	1.06786	1.08606	1.06439	0.991803	0.993336	1.03015	0.994121	0.957619	0.999588	1.2236	0.997659	1.04525	0.991622	1.16977	1.29653	1.29735	1.07277	1.0051	0.983776
A0A0H3BZW8	8	8	85.9322	0.0868111	1.34215	26792.9	ABC transporter_ ATP-binding protein OS=Streptococcus pyogenes serotype M49 (strain NZ131) OX=471876 GN=Spy49_1345c PE=4 SV=1	2.28699	2.67356	2.00803	2.0855	2.39957	1.809	2.23498	2.42873	1.88049	2.4245	2.63176	2.03771	2.25128	2.47622	2.09809	2.33898	2.53723	2.03937	1.94519	2.32153	1.78902	2.00933	2.19984	1.95832	1.93817	2.12825	1.91526	2.62061	2.82671	2.58096	2.32286	2.09802	2.1814	2.36466	2.2752	2.30519	2.01858	2.05583	1.99389	2.67609
A0A0H3BYZ2	10	10	80.7808	0.00213502	1.3301	66773.2	ABC transporter_ ATP-binding/permease protein OS=Streptococcus pyogenes serotype M49 (strain NZ131) OX=471876 GN=Spy49_0195 PE=4 SV=1	2.6807	2.73007	2.43871	2.82855	2.96125	2.53664	2.71656	2.79828	2.45325	2.48898	2.45106	2.04971	2.38195	2.48959	2.1823	2.41274	2.76867	2.20123	3.09384	3.3804	2.74583	2.68093	2.9714	2.49775	3.0007	3.40882	2.88751	2.96373	3.14365	2.90612	2.61649	2.77548	2.65603	2.32992	2.35128	2.46088	3.07336	2.71669	3.09901	3.0045
A0A0H3C019	4	4	26.2261	1.10582e-09	3.449	40563.5	ABC transporter_ periplasmic spermidine putrescine-binding protein potD OS=Streptococcus pyogenes serotype M49 (strain NZ131) OX=471876 GN=potD PE=3 SV=1	0.510295	0.457883	0.511964	0.298758	0.308528	0.395146	0.493613	0.447112	0.665357	0.583278	0.565893	0.723966	0.569036	0.528724	0.669967	0.785511	0.814204	0.887626	0.637805	0.617293	0.744062	0.456417	0.469485	0.503638	0.247256	0.234097	0.239825	0.244813	0.211479	0.267125	0.493381	0.334144	0.535361	0.624379	0.589242	0.829114	0.666387	0.476514	0.240393	0.241139
A0A0H3BVT8	19	18	237.111	1.18921e-07	1.71674	23954	ABC transporter_ substrate-binding protein OS=Streptococcus pyogenes serotype M49 (strain NZ131) OX=471876 GN=atmA PE=4 SV=1	8.97881	9.64181	8.66683	9.96	11.8492	10.1834	10.8549	12.3602	11.7154	9.42978	10.3627	10.6427	12.2039	12.9777	11.6206	6.82351	7.57126	7.04256	7.79884	8.76485	6.87809	9.14397	10.2789	9.45189	7.85959	8.81267	7.75183	8.09992	9.12786	8.40504	9.09582	10.6642	11.6435	10.1451	12.2674	7.14577	7.81393	9.62491	8.14136	8.54427
A0A0H3BZN9	11	10	105.621	0	25.5162	53734.2	ABC transporter_ substrate-binding protein OS=Streptococcus pyogenes serotype M49 (strain NZ131) OX=471876 GN=Spy49_1230c PE=4 SV=1	0.334702	0.338396	0.381091	0.317029	0.298257	0.394424	0.338904	0.30055	0.358656	2.8334	2.98316	3.23577	0.395007	0.358184	0.393576	0.260069	0.208946	0.280265	0.123102	0.0789707	0.152695	0.418774	0.373021	0.427608	0.350588	0.305412	0.383603	0.162966	0.152516	0.184855	0.351396	0.33657	0.332703	3.01744	0.382256	0.24976	0.118256	0.406468	0.346534	0.166779
B5XJD9	32	27	390.067	7.52232e-12	1.74192	43704	Acetate kinase OS=Streptococcus pyogenes serotype M49 (strain NZ131) OX=471876 GN=ackA PE=3 SV=1	19.0966	17.9597	18.0038	14.2759	14.8844	13.9207	19.8428	20.0968	19.0297	22.5451	24.8574	21.6201	21.9568	20.2855	19.4464	25.5147	25.6879	23.8411	22.6627	21.5607	23.4168	17.4881	17.8092	17.3447	15.4999	15.9643	15.3816	18.6483	18.0484	17.1394	18.3534	14.3603	19.6564	23.0075	20.5629	25.0146	22.5467	17.5473	15.6153	17.9454
A0A0H3BY27	2	2	21.6203	0.000168292	1.72213	11378.1	Acetate kinase OS=Streptococcus pyogenes serotype M49 (strain NZ131) OX=471876 GN=Spy49_1222c PE=4 SV=1	0.21574	0.253293	0.264928	0.183766	0.216058	0.268678	0.236266	0.239348	0.290618	0.356071	0.318791	0.416837	0.32979	0.319268	0.33198	0.304532	0.265725	0.351242	0.208292	0.23637	0.292945	0.264453	0.227619	0.303358	0.216846	0.206905	0.223946	0.225175	0.204594	0.204153	0.244654	0.222834	0.255411	0.3639	0.327013	0.307166	0.245869	0.265143	0.215899	0.211307
A0A0H3BZE2	22	20	285.007	3.201e-12	3.02616	26863.2	Acetoin(diacetyl) reductase OS=Streptococcus pyogenes serotype M49 (strain NZ131) OX=471876 GN=Spy49_0540 PE=3 SV=1	6.35729	7.12791	7.14566	5.93448	6.39389	6.69383	8.80672	8.86255	9.95748	18.5522	16.781	21.9591	7.66911	7.0658	7.93048	6.23622	5.82454	6.87159	7.91207	7.54134	7.96976	7.70879	7.25203	8.09235	8.03983	7.60401	8.73307	9.16367	8.40638	9.42148	6.87695	6.34073	9.20892	19.0974	7.55513	6.31078	7.80772	7.68439	8.12564	8.99717
A0A0H3BZR3	21	19	230.024	0.000125103	1.79509	41942.2	Acetyl-CoA acetyltransferase OS=Streptococcus pyogenes serotype M49 (strain NZ131) OX=471876 GN=atoB PE=3 SV=1	2.89323	2.89801	3.60663	4.61104	4.23253	5.7345	3.61536	3.46641	4.54276	3.07354	2.8459	3.78704	3.04474	2.83259	3.4139	2.82137	2.25953	3.04019	2.79145	2.54433	3.2167	3.64523	3.13768	3.92977	4.44645	3.88172	5.05231	4.69587	3.91078	4.96479	3.13262	4.85936	3.87484	3.23549	3.09708	2.70703	2.85083	3.57089	4.46016	4.52382
B5XHX5	11	9	122.39	0	5.44622	28167.3	Acetyl-coenzyme A carboxylase carboxyl transferase subunit alpha OS=Streptococcus pyogenes serotype M49 (strain NZ131) OX=471876 GN=accA PE=3 SV=1	3.02814	3.11745	3.26809	1.30819	1.45446	1.61579	2.83686	2.78407	3.4189	2.64558	2.67964	3.2253	4.3601	4.36435	4.56939	7.72924	7.64898	8.4677	6.46798	7.1066	6.65206	2.50075	2.45576	2.50774	1.85802	1.92101	1.88342	2.34264	2.14244	2.42845	3.13789	1.45948	3.01328	2.85018	4.43128	7.94864	6.74221	2.48808	1.88749	2.30451
B5XHX6	16	13	163.746	0	7.72083	32009.1	Acetyl-coenzyme A carboxylase carboxyl transferase subunit beta OS=Streptococcus pyogenes serotype M49 (strain NZ131) OX=471876 GN=accD PE=3 SV=1	4.91611	5.48497	5.16032	1.48008	1.53157	1.55996	4.29167	4.62859	4.56862	3.81424	3.90906	4.0409	6.46623	6.70295	6.61254	11.9608	11.5781	11.4821	11.75	11.8722	11.6745	3.79399	3.75385	3.80888	2.35001	2.2846	2.37204	2.57671	2.40372	2.69576	5.18713	1.52387	4.49629	3.9214	6.59391	11.6736	11.7655	3.78558	2.33555	2.55873
A0A0H3BY46	8	8	80.3634	6.87327e-07	1.4235	27768.1	Acid sugar phosphatase OS=Streptococcus pyogenes serotype M49 (strain NZ131) OX=471876 GN=Spy49_0821 PE=3 SV=1	1.54983	1.75027	1.6188	1.7993	2.06824	1.75718	1.74097	1.93906	1.71702	1.64348	1.68563	1.77466	1.69776	1.74729	1.86216	2.28744	2.397	2.31763	2.04073	2.1454	1.98232	1.68209	1.7269	1.68432	1.70604	1.88552	1.76525	1.9758	2.08432	2.00991	1.63963	1.87491	1.79902	1.70126	1.76907	2.33402	2.05615	1.69777	1.7856	2.02334
A0A0H3BVC4	3	3	47.8654	0.353709	1.139	9482.82	Acyl carrier protein OS=Streptococcus pyogenes serotype M49 (strain NZ131) OX=471876 GN=acp PE=3 SV=1	1.29207	1.33388	1.30308	1.26008	1.36745	1.24868	1.23323	1.22978	1.29032	1.37113	1.38551	1.19028	1.28612	1.35757	1.13529	1.30507	1.32964	1.37925	1.32192	1.40854	1.40263	1.30149	1.32864	1.45491	1.36316	1.46394	1.37239	1.66297	1.32294	1.28913	1.30968	1.29207	1.25111	1.31564	1.25966	1.33799	1.3777	1.36168	1.39983	1.42501
A0A0H3BVW1	3	3	31.4602	0.0101384	2.34783	10383.8	Acylphosphatase OS=Streptococcus pyogenes serotype M49 (strain NZ131) OX=471876 GN=Spy49_0292c PE=3 SV=1	1.52807	1.68198	1.27062	1.28169	0.765507	1.44929	1.6316	0.888789	1.07021	1.75349	2.6236	2.10037	0.916753	0.742551	1.09961	1.01183	1.36159	0.998361	1.23786	0.908396	1.4868	1.42607	1.36211	1.21624	1.04823	0.833352	1.07542	0.759505	0.928782	1.60481	1.49356	1.1655	1.19687	2.15915	0.919639	1.12393	1.21102	1.3348	0.985666	1.0977
B5XJR8	3	3	22.0177	3.45542e-09	8.66744	29108.8	Adapter protein MecA OS=Streptococcus pyogenes serotype M49 (strain NZ131) OX=471876 GN=mecA PE=3 SV=1	0.809245	0.942253	0.759665	1.14625	1.40705	0.915616	1.12639	1.37362	0.900922	1.08214	1.16637	0.866987	0.944371	0.959028	0.807936	0.55652	0.685868	0.515211	0.179838	0.210938	0.16227	0.851502	0.986009	0.778704	0.909638	1.03884	0.862163	1.5882	1.69265	1.51265	0.837054	1.1563	1.13364	1.0385	0.903778	0.585866	0.184349	0.872072	0.936879	1.59783
B5XL39	18	17	233.455	0.000194783	1.14226	18857.8	Adenine phosphoribosyltransferase OS=Streptococcus pyogenes serotype M49 (strain NZ131) OX=471876 GN=apt PE=3 SV=1	8.474	8.79972	8.2251	9.77438	9.86986	9.47426	8.55987	8.80687	8.2531	8.35933	8.6757	8.54138	8.9323	8.77782	8.47945	8.69731	9.16854	8.24527	9.72838	10.2862	9.11164	8.94197	8.79114	8.88475	9.23402	9.31254	9.10972	8.75644	8.68127	9.1532	8.49961	9.70617	8.53995	8.52547	8.72985	8.70371	9.70874	8.87262	9.21876	8.86364
A0A0H3BVF9	6	6	59.4567	2.45508e-08	1.88952	36109.2	Adenine-specific methyltransferase OS=Streptococcus pyogenes serotype M49 (strain NZ131) OX=471876 GN=Spy49_0097 PE=4 SV=1	0.565544	0.546504	0.578119	0.539191	0.62174	0.614535	0.630907	0.730814	0.716046	0.782349	0.828779	0.846835	0.853552	0.784216	0.695911	0.963047	0.880843	0.931982	0.701213	0.795476	0.754786	0.582589	0.528511	0.61395	0.54236	0.401242	0.52549	0.717346	0.679281	0.708679	0.563389	0.591822	0.692589	0.819321	0.777893	0.925291	0.750492	0.575017	0.489697	0.701769
B5XJ57	27	22	336.164	1.55745e-06	2.48431	23725	Adenylate kinase OS=Streptococcus pyogenes serotype M49 (strain NZ131) OX=471876 GN=adk PE=3 SV=1	12.2118	14.8456	11.3203	13.615	16.73	11.7054	10.9498	12.3216	9.3058	11.8374	12.2256	10.2153	12.7031	13.9535	11.949	13.0124	15.3817	12.3805	7.04252	8.64963	6.68906	12.8001	14.1066	11.7445	14.5965	15.9756	14.4466	18.3622	19.3862	17.8534	12.7926	14.0168	10.8591	11.4261	12.8685	13.5915	7.4604	12.8837	15.0062	18.5339
A0A0H3BVD2	34	30	382.217	0.000839957	1.3786	49695.5	Adenylosuccinate lyase OS=Streptococcus pyogenes serotype M49 (strain NZ131) OX=471876 GN=purB PE=3 SV=1	7.69969	6.91823	7.9777	7.92563	7.57249	8.30118	6.34316	6.01218	7.14662	6.21029	5.42842	6.18664	7.06821	6.0825	6.68846	7.56695	6.35976	7.59575	7.72023	7.00519	8.18149	8.0021	7.52667	8.62493	8.48593	7.25561	8.83255	8.40262	7.23687	8.33733	7.53187	7.9331	6.50065	5.94178	6.61306	7.17415	7.63564	8.05123	8.19136	7.99227
B5XJH8	33	30	468.481	5.55112e-16	1.94568	47553.9	Adenylosuccinate synthetase OS=Streptococcus pyogenes serotype M49 (strain NZ131) OX=471876 GN=purA PE=3 SV=1	11.216	11.3357	11.473	11.9211	12.3559	13.1269	11.4523	11.2388	12.3002	10.5084	10.8877	11.2213	10.9592	10.9971	11.7009	20.0475	19.9977	20.7831	20.3694	21.7636	21.3302	11.1193	10.8366	11.5964	11.5375	10.9872	11.3688	12.4503	11.398	12.6307	11.3415	12.468	11.6638	10.8725	11.2191	20.2761	21.1544	11.1841	11.2979	12.1597
A0A0H3BYZ1	7	6	50.648	0.0839751	1.59096	20879.9	ADP-ribose pyrophosphatase OS=Streptococcus pyogenes serotype M49 (strain NZ131) OX=471876 GN=Spy49_0376 PE=4 SV=1	1.05459	0.959271	1.34894	1.44633	1.28438	1.96075	1.0248	0.913537	1.41353	1.18249	1.0601	1.72084	1.23244	1.06479	1.50601	1.09743	0.931109	1.29043	1.45865	1.28151	2.04452	1.51948	1.13835	1.61401	1.78444	1.47189	2.02401	1.55695	1.28177	1.8643	1.12093	1.56382	1.11729	1.32115	1.26775	1.10632	1.59489	1.42395	1.76011	1.56767
B5XI21	13	13	101.092	0.000390662	1.59525	40119	Alanine racemase OS=Streptococcus pyogenes serotype M49 (strain NZ131) OX=471876 GN=alr PE=3 SV=1	3.15817	3.34935	2.85716	2.82681	3.32061	2.51539	2.69611	2.67684	2.2017	2.48015	2.78326	2.14485	2.71882	3.00251	2.44996	3.24814	3.90246	3.11512	3.94026	4.11354	3.76421	2.62418	2.93723	2.59135	2.66219	3.00123	2.51231	2.61092	3.03675	2.5014	3.12156	2.8876	2.52488	2.46942	2.72377	3.42191	3.93934	2.71759	2.72525	2.71636
A0A0H3BXS7	60	54	631.734	0.000117992	1.71715	96690	Alanine--tRNA ligase OS=Streptococcus pyogenes serotype M49 (strain NZ131) OX=471876 GN=alaS PE=3 SV=1	10.1049	11.2917	9.97087	8.45864	10.3391	7.59009	8.37052	9.59992	6.99096	6.38768	7.32788	5.5644	8.18909	9.42465	7.94044	10.7005	12.1844	10.2216	10.5752	11.4674	10.098	8.00791	9.11155	7.42119	7.30446	8.3593	7.04499	7.33395	8.67168	7.2955	10.4558	8.79595	8.32047	6.42665	8.51806	11.0355	10.7136	8.18022	7.56958	7.76704
A0A0H3BWE7	22	21	319.737	6.66134e-16	9.05356	35751.5	Alcohol dehydrogenase OS=Streptococcus pyogenes serotype M49 (strain NZ131) OX=471876 GN=adhP PE=3 SV=1	21.6077	21.7967	24.6472	5.72137	5.62111	6.98407	22.9126	22.8394	27.3154	54.9247	49.9362	61.0598	23.9787	20.7636	25.298	12.3461	12.0486	15.6344	11.3792	11.6148	12.4827	22.4455	19.3993	22.4418	7.2427	6.76368	8.07104	11.4102	10.3887	12.223	22.6839	6.10885	24.3558	55.3069	23.3468	13.343	11.8256	21.4289	7.35914	11.3407
A0A0H3BVD7	66	57	878.902	3.41949e-14	2.17165	97436.8	Aldehyde-alcohol dehydrogenase OS=Streptococcus pyogenes serotype M49 (strain NZ131) OX=471876 GN=adhE PE=3 SV=1	49.8332	56.5381	48.9922	26.5734	29.5484	28.5529	60.4936	63.023	60.3675	59.0532	61.1133	63.4768	44.3629	47.9389	45.2005	40.1701	44.3632	38.7626	57.2544	65.1016	52.8058	42.0743	44.6432	41.5133	30.0551	29.7633	29.5649	29.1726	30.3714	30.1739	51.7878	28.2249	61.2947	61.2144	45.8341	41.0986	58.3873	42.7436	29.7944	29.906
A0A0H3C2K4	13	13	209.631	0.0159401	1.43896	20654.2	Alkyl hydroperoxide reductase C OS=Streptococcus pyogenes serotype M49 (strain NZ131) OX=471876 GN=ahpC PE=3 SV=1	38.0469	36.3517	43.1095	52.0622	47.1425	59.511	45.5925	37.9992	51.5131	53.1506	45.9803	63.0535	49.7809	41.2294	53.373	40.4612	32.1143	43.5115	49.7571	41.4658	55.774	56.5438	47.286	58.7239	58.3036	48.965	59.7761	55.9676	46.7617	58.5221	39.1693	52.9052	45.0349	54.0615	48.1278	38.6957	48.9989	54.1846	55.6816	53.7505
A0A0H3BZ90	33	30	455.858	8.66894e-06	1.54131	55036.7	Alkyl hydroperoxide reductase protein F OS=Streptococcus pyogenes serotype M49 (strain NZ131) OX=471876 GN=nox3 PE=3 SV=1	13.5709	15.7986	13.6025	20.1438	24.4449	18.0672	18.5043	21.6341	16.5613	20.0903	21.5014	18.3543	17.816	19.1112	17.2466	13.983	15.7738	13.8288	13.1611	15.1652	13.1965	19.3722	20.6491	18.5324	19.3377	21.7616	18.7014	21.3425	21.4495	21.2076	14.324	20.8853	18.8999	19.982	18.0579	14.5286	13.8409	19.5179	19.9335	21.3332
A0A0H3C0E2	31	26	321.695	1.81983e-11	2.74065	85953.8	Alpha-1_4 glucan phosphorylase OS=Streptococcus pyogenes serotype M49 (strain NZ131) OX=471876 GN=glgP PE=3 SV=1	4.06852	4.35266	4.64112	1.56275	1.39966	1.80373	3.66448	3.61426	4.03513	3.16214	3.1147	3.44042	3.97677	3.59291	4.10159	2.56601	2.21985	2.82397	2.87576	2.55936	3.14095	3.22516	2.85265	3.40211	1.78692	1.64116	1.84502	2.31841	2.00252	2.29505	4.3541	1.58871	3.77129	3.23909	3.89042	2.53661	2.85869	3.15997	1.7577	2.20533
A0A0H3C1M0	9	8	65.0873	1.11022e-16	3.56197	67586.2	Alpha-glycerophosphate oxidase OS=Streptococcus pyogenes serotype M49 (strain NZ131) OX=471876 GN=glpO PE=3 SV=1	0.277713	0.271864	0.319172	0.259452	0.261492	0.261388	0.360274	0.358135	0.362552	0.779093	0.712195	0.789975	0.361515	0.321644	0.356927	0.218177	0.196031	0.226241	0.272019	0.239862	0.257353	0.395044	0.347525	0.365946	0.280464	0.279122	0.298342	0.297442	0.267028	0.301545	0.289583	0.260777	0.36032	0.760421	0.346695	0.213483	0.256412	0.369505	0.285976	0.288672
A0A0H3BYA2	5	4	32.2907	7.43849e-15	2.9354	54001	Amidophosphoribosyltransferase OS=Streptococcus pyogenes serotype M49 (strain NZ131) OX=471876 GN=purF PE=3 SV=1	0.428893	0.472051	0.417916	0.419874	0.438439	0.423251	0.294828	0.301938	0.32196	0.1844	0.182299	0.200137	0.389086	0.405224	0.399808	0.560181	0.566083	0.537631	0.366346	0.407928	0.361447	0.412268	0.399498	0.401626	0.351004	0.376878	0.353849	0.361235	0.334266	0.355191	0.43962	0.427188	0.306242	0.188945	0.39804	0.554632	0.378574	0.404464	0.360577	0.350231
A0A0H3BVR1	17	12	166.094	0.00913989	1.42877	27502.5	Amino acid ABC transporter_ ATP-binding protein OS=Streptococcus pyogenes serotype M49 (strain NZ131) OX=471876 GN=Spy49_0236c PE=4 SV=1	3.61417	3.62231	4.1967	3.81243	3.80312	4.38868	4.09791	4.44104	5.02984	3.72557	3.54899	4.41068	4.03918	3.56954	4.61113	5.2426	5.23537	5.85742	4.37576	4.4556	4.67739	4.07344	3.68638	4.37715	3.87338	3.82186	4.43783	4.4058	3.4441	4.50761	3.81106	4.00141	4.52293	3.89508	4.07328	5.44513	4.50292	4.04566	4.04436	4.11917
A0A0H3BYK6	5	5	63.3242	1.41617e-07	1.81154	23081.6	Amino acid ABC transporter_ ATP-binding protein OS=Streptococcus pyogenes serotype M49 (strain NZ131) OX=471876 GN=Spy49_1012c PE=4 SV=1	4.11167	3.984	4.03995	3.513	4.36022	3.61659	3.86731	4.00655	3.33525	3.07245	3.04317	2.74764	3.26409	3.5213	3.18551	4.38638	4.8025	4.28505	5.20551	5.54217	5.30848	3.86358	3.89937	3.49824	3.91738	3.89478	3.67224	3.79815	3.91271	3.40812	4.04521	3.82994	3.73637	2.95442	3.32363	4.49131	5.35205	3.75373	3.82813	3.70632
A0A0H3BZ94	13	11	109.739	2.19266e-11	1.8832	27539.8	Amino acid ABC transporter_ ATP-binding protein OS=Streptococcus pyogenes serotype M49 (strain NZ131) OX=471876 GN=Spy49_1286c PE=4 SV=1	4.97629	5.42546	5.02801	3.67586	4.0963	3.44399	5.29085	5.7468	4.91002	5.38998	5.46465	4.98212	5.62924	5.59616	5.06136	3.38208	3.59304	3.29713	2.7913	3.05181	2.80532	4.64941	4.72239	4.28013	3.48935	3.70725	3.32913	4.00834	4.15193	4.00124	5.14325	3.73872	5.31589	5.27892	5.42892	3.42408	2.88281	4.55064	3.50858	4.05384
A0A0H3BZ53	4	4	41.8038	0.000607721	1.26964	23990.1	Amino acid ABC transporter_ permease protein OS=Streptococcus pyogenes serotype M49 (strain NZ131) OX=471876 GN=Spy49_1013c PE=3 SV=1	1.24403	1.42723	1.21222	1.3154	1.52947	1.24557	1.23726	1.31038	1.17536	1.16989	1.18117	1.08361	1.20189	1.24568	1.10658	1.26077	1.20992	1.24875	1.34447	1.50229	1.51402	1.13357	1.16511	1.14858	1.35919	1.47799	1.2901	1.42225	1.49495	1.36957	1.29449	1.36348	1.241	1.14489	1.18471	1.23981	1.45359	1.14909	1.37576	1.42893
A0A0H3C0X9	2	2	20.7965	6.03222e-05	1.93502	50931.3	Amino acid permease OS=Streptococcus pyogenes serotype M49 (strain NZ131) OX=471876 GN=aapA PE=4 SV=1	1.147	1.02929	1.30838	1.0339	0.918178	1.2727	1.14206	1.01028	1.44129	1.01629	0.895896	1.40618	1.34912	1.18882	1.42036	1.95765	1.60633	2.19282	1.65927	1.59098	1.95029	1.11459	0.933003	1.19424	0.957214	0.9189	1.09895	1.03203	0.875444	1.0709	1.16156	1.07492	1.19788	1.10612	1.31943	1.91893	1.73351	1.08061	0.991688	0.992792
A0A0H3BWG8	14	12	122.201	0.00950194	1.88087	47680.4	Aminoacyltransferase FemA OS=Streptococcus pyogenes serotype M49 (strain NZ131) OX=471876 GN=murN PE=3 SV=1	0.880111	0.974038	1.28082	1.18095	1.22194	1.55479	1.2963	1.33849	1.82421	1.48946	1.35833	1.70109	1.44389	1.21792	1.63946	1.15437	0.986592	1.46699	0.752176	0.743894	0.92243	1.24192	0.948061	1.31977	1.22542	1.02606	1.51829	1.47566	1.12991	1.56747	1.04499	1.31923	1.48633	1.51629	1.43376	1.20265	0.806167	1.16992	1.25659	1.39101
A0A0H3BY69	39	37	463.481	0.00218732	1.51201	50891.5	Aminopeptidase OS=Streptococcus pyogenes serotype M49 (strain NZ131) OX=471876 GN=pepC PE=3 SV=1	23.4346	23.7953	28.5722	28.9993	27.2194	31.6858	23.0958	21.5231	28.3925	27.1122	24.5845	28.5058	23.805	21.6741	25.5644	20.2504	16.4021	22.0742	22.0727	20.4424	27.4117	27.7382	25.4267	30.471	29.931	26.3948	31.7643	30.5252	27.9385	30.3318	25.2674	29.3015	24.3372	26.7341	23.6812	19.5756	23.3089	27.8786	29.3634	29.5985
A0A0H3BYG9	51	43	539.977	4.77787e-05	2.05398	96412.1	Aminopeptidase OS=Streptococcus pyogenes serotype M49 (strain NZ131) OX=471876 GN=pepN PE=3 SV=1	12.1224	11.6231	13.8559	12.7791	11.2962	14.2104	11.2683	10.6926	13.5865	7.80123	6.86777	8.85345	13.9853	11.9077	15.8848	15.5596	12.3268	16.0953	16.5151	13.8777	17.9217	12.9854	11.3846	12.77	11.8749	10.8656	12.8793	11.5607	10.4049	12.4085	12.5338	12.7619	11.8491	7.84082	13.9259	14.6606	16.1048	12.38	11.8733	11.458
A0A0H3BYI3	3	2	24.7061	0.0010272	1.52073	39554.9	Aminopeptidase YpdF (MP-_ MA-_ MS-_ AP-_ NP-specific) OS=Streptococcus pyogenes serotype M49 (strain NZ131) OX=471876 GN=pepP PE=3 SV=1	0.659846	0.75798	0.596925	0.665437	0.69609	0.541154	0.665552	0.625928	0.595561	0.582136	0.622153	0.527062	0.646474	0.723508	0.614159	0.703938	0.77923	0.642817	0.864839	0.921032	0.847056	0.595182	0.715138	0.62622	0.630089	0.694667	0.57599	0.627528	0.671862	0.578821	0.671584	0.634227	0.629014	0.577117	0.661381	0.708661	0.877642	0.645513	0.633582	0.62607
A0A0H3BWJ1	9	6	78.1313	5.55112e-16	2.33309	43578.8	Aminotransferase OS=Streptococcus pyogenes serotype M49 (strain NZ131) OX=471876 GN=aspC PE=3 SV=1	0.996904	0.935561	0.95036	0.804817	0.803692	0.887326	1.17307	1.13646	1.20473	1.13718	1.1617	1.24443	1.06143	1.06941	1.12417	1.77845	1.9598	1.73182	1.60254	1.64737	1.53312	0.918391	0.967345	0.921064	0.738026	0.786697	0.819838	0.829377	0.792373	0.829911	0.960942	0.831945	1.17142	1.1811	1.085	1.82336	1.59434	0.9356	0.781521	0.81722
A0A0H3C2F5	31	23	330.981	1.36429e-10	1.91117	43487.8	Antiphagocytic M protein OS=Streptococcus pyogenes serotype M49 (strain NZ131) OX=471876 GN=emm49 PE=3 SV=1	18.0205	16.1462	18.4495	16.7595	15.2806	15.9733	10.6057	8.53	11.4534	9.08972	8.50852	10.0123	18.5661	15.7722	17.4986	11.7746	10.9764	11.6195	12.0072	11.1662	11.5139	18.0994	16.8113	16.8096	17.1893	15.4847	15.9099	17.9915	17.0704	17.7065	17.5387	16.0045	10.1964	9.20351	17.279	11.4569	11.5625	17.2401	16.1946	17.5895
A0A0H3BXU8	8	8	99.5481	0	16.9815	32676.8	AP_endonuc_2 domain-containing protein OS=Streptococcus pyogenes serotype M49 (strain NZ131) OX=471876 GN=Spy49_0451 PE=4 SV=1	1.13809	1.18438	1.07786	1.07031	1.18234	1.01714	0.955398	0.94554	0.902975	0.941067	0.99092	0.834077	0.937405	0.971112	0.896559	15.3653	18.5226	13.0839	8.79492	10.3329	7.87492	1.03977	0.97868	0.946971	1.00855	1.03036	0.949466	0.857523	1.01079	0.938645	1.13345	1.08993	0.934638	0.922021	0.935025	15.6573	9.00092	0.988472	0.996128	0.935653
A0A0H3BYB3	15	14	170.206	0.0050419	1.20812	31107.1	APH domain-containing protein OS=Streptococcus pyogenes serotype M49 (strain NZ131) OX=471876 GN=Spy49_1343c PE=4 SV=1	2.89101	3.51755	3.26108	2.98652	3.47795	3.25849	2.67556	2.60392	2.76854	2.8878	2.89137	3.20365	2.67389	2.75445	2.63658	2.78809	2.77603	2.84907	3.07959	3.49568	3.02867	3.1054	2.98527	3.17915	2.98284	2.74825	3.21735	2.93666	2.68232	3.00826	3.22322	3.24099	2.68267	2.99428	2.68831	2.8044	3.20131	3.08994	2.98282	2.87575
A0A0H3BW88	20	18	276.438	0	89.3794	46055.4	Archaeal S-adenosylmethionine synthetase OS=Streptococcus pyogenes serotype M49 (strain NZ131) OX=471876 GN=Spy49_0455 PE=3 SV=1	0.684828	0.71381	0.715397	0.672178	0.671544	0.752926	0.662301	0.619592	0.719718	0.595505	0.58858	0.64952	0.677099	0.590121	0.666946	52.7682	50.5344	60.5839	24.4181	25.8293	28.1588	0.704259	0.665889	0.764424	0.704637	0.665386	0.740889	0.732006	0.676856	0.734231	0.704678	0.698883	0.667203	0.611202	0.644722	54.6288	26.1354	0.711524	0.703637	0.714365
B5XMC3	46	44	640.794	0	3.29742	46320.8	Arginine deiminase OS=Streptococcus pyogenes serotype M49 (strain NZ131) OX=471876 GN=arcA PE=3 SV=1	86.2439	82.9439	80.813	44.1466	45.3649	43.2193	95.1932	94.9355	95.5398	153.43	137.946	146.293	91.6782	84.0188	86.3695	58.2473	56.4045	57.2653	68.0815	64.349	68.7564	96.9735	93.5814	93.7706	52.1806	48.7366	53.8893	58.643	55.7704	57.2922	83.3336	44.2436	95.2228	145.89	87.3555	57.3057	67.0623	94.7752	51.6022	57.2352
A0A0H3C1A0	9	9	100.784	0.0550687	1.27041	17454.5	Arginine repressor OS=Streptococcus pyogenes serotype M49 (strain NZ131) OX=471876 GN=argR PE=3 SV=1	4.604	4.78097	5.04965	4.97139	5.09676	5.17727	4.81273	4.06854	5.27471	5.69207	4.01563	5.11169	4.85786	4.60928	4.94916	6.18886	5.54146	6.14966	5.83132	4.8698	6.40918	4.91326	4.88687	4.68078	4.65461	4.89102	5.28424	5.04308	4.45422	4.57685	4.81154	5.08181	4.71866	4.9398	4.80543	5.96	5.70343	4.82697	4.94329	4.69138
B5XMC5	6	5	57.6124	0	16.8845	18238.8	Arginine repressor OS=Streptococcus pyogenes serotype M49 (strain NZ131) OX=471876 GN=argR PE=3 SV=1	0.398832	0.411581	0.427852	0.126091	0.128286	0.15267	0.743617	0.709377	0.870685	1.54841	1.4561	1.69904	0.665673	0.608091	0.671746	0.333844	0.314619	0.395372	0.0863356	0.0847666	0.10747	0.396337	0.369818	0.445656	0.220528	0.188023	0.216482	0.372416	0.341973	0.384731	0.412755	0.135682	0.77456	1.56785	0.648503	0.347945	0.0928574	0.403937	0.208344	0.366373
B5XJ77	48	43	608.425	2.30758e-06	1.69351	63049.8	Arginine--tRNA ligase OS=Streptococcus pyogenes serotype M49 (strain NZ131) OX=471876 GN=argS PE=3 SV=1	20.6725	22.0197	19.3156	20.503	22.4353	17.6288	20.1019	20.681	17.3708	18.0226	18.2587	15.9158	20.7963	22.2699	18.9966	29.544	32.5685	26.2836	29.326	32.9573	25.8911	19.5071	21.2728	18.6577	19.4939	21.1752	18.9153	20.3557	20.2751	19.6345	20.6692	20.189	19.3846	17.399	20.6876	29.4654	29.3914	19.8125	19.8615	20.0884
A0A0H3BZP2	5	5	35.5541	1.42331e-13	3.74972	16332.8	Arsenate reductase OS=Streptococcus pyogenes serotype M49 (strain NZ131) OX=471876 GN=arsC PE=3 SV=1	0.344841	0.369553	0.338485	0.244643	0.290935	0.228222	0.379283	0.435727	0.34339	0.578158	0.610354	0.519529	0.480007	0.489161	0.423897	0.797707	0.838662	0.739434	0.362973	0.369996	0.399209	0.324242	0.363526	0.305075	0.197251	0.225711	0.210631	0.302292	0.300696	0.26597	0.35096	0.2546	0.386133	0.569347	0.464355	0.791934	0.377393	0.330948	0.211198	0.289653
A0A0H3BXK8	27	22	302.552	8.71568e-11	1.58389	51277.1	Asparagine--tRNA ligase OS=Streptococcus pyogenes serotype M49 (strain NZ131) OX=471876 GN=asnS PE=3 SV=1	10.507	10.6288	10.6565	9.20115	8.58307	9.06576	9.71018	8.80747	9.60961	10.4293	9.51874	9.86851	9.88194	9.26047	9.79022	11.607	10.9942	11.446	14.3449	13.3146	14.645	9.79518	9.59085	9.73928	9.36187	9.18705	9.4995	9.15005	8.31788	9.24136	10.5974	8.95	9.37575	9.93886	9.64421	11.3491	14.1015	9.70844	9.34947	8.90309
A0A0H3BYF8	20	16	242.996	1.80772e-06	1.62544	44336.1	Aspartate aminotransferase OS=Streptococcus pyogenes serotype M49 (strain NZ131) OX=471876 GN=Spy49_1388c PE=4 SV=1	5.99999	6.18789	6.20366	7.71262	8.68684	8.93126	7.26615	7.34784	8.21277	7.16726	7.21137	8.26411	6.16395	5.85446	6.57847	5.19018	4.63877	5.75498	5.90724	6.31934	6.16325	6.50512	6.18604	7.22949	7.76388	7.02394	7.88012	8.40506	7.06414	8.57412	6.13051	8.44357	7.60892	7.54758	6.19896	5.19465	6.12994	6.64022	7.55598	8.01444
B5XKW0	7	7	60.2076	0	15.2042	34729.4	Aspartate carbamoyltransferase OS=Streptococcus pyogenes serotype M49 (strain NZ131) OX=471876 GN=pyrB PE=3 SV=1	0.157076	0.142507	0.162577	0.0991457	0.100921	0.121281	0.190268	0.178776	0.20756	0.288759	0.272087	0.29243	0.37873	0.331623	0.374776	1.50033	1.31344	1.60307	1.62874	1.42818	1.82894	0.17644	0.155834	0.182755	0.124428	0.105883	0.117941	0.144628	0.128655	0.145225	0.154053	0.107116	0.192201	0.284425	0.36171	1.47228	1.62862	0.171676	0.116084	0.139503
B5XMB7	18	16	161.548	4.53637e-13	2.17115	37311.4	Aspartate--ammonia ligase OS=Streptococcus pyogenes serotype M49 (strain NZ131) OX=471876 GN=asnA PE=3 SV=1	1.74371	1.80552	1.83551	2.36772	2.48356	2.75256	2.29923	2.32975	2.64806	2.3233	2.21471	2.36176	1.50443	1.52427	1.63857	1.18118	1.22247	1.30169	2.30517	2.28872	2.57617	2.00432	1.96595	2.08669	2.57241	2.73146	2.74095	2.58139	2.47051	2.64821	1.79491	2.53461	2.42568	2.29992	1.55576	1.23511	2.39002	2.01898	2.68161	2.56671
B5XJ82	41	35	432.364	1.6945e-09	1.58325	66084.4	Aspartate--tRNA ligase OS=Streptococcus pyogenes serotype M49 (strain NZ131) OX=471876 GN=aspS PE=3 SV=1	6.09991	6.57305	6.83659	5.8747	6.1613	6.53166	5.98933	6.26188	6.79113	5.86862	6.07927	6.33482	6.5343	6.53619	7.13805	7.37155	7.22254	7.80721	9.57037	9.23072	9.78557	6.20648	6.22072	6.58262	6.07177	5.70046	6.36544	6.0099	5.93416	6.11158	6.50318	6.18922	6.34745	6.09423	6.73618	7.4671	9.52889	6.3366	6.04589	6.01855
B5XHZ8	29	22	329.795	6.30158e-11	1.43261	53373.3	Aspartyl/glutamyl-tRNA(Asn/Gln) amidotransferase subunit B OS=Streptococcus pyogenes serotype M49 (strain NZ131) OX=471876 GN=gatB PE=3 SV=1	11.2116	11.8268	11.324	14.6715	14.7689	14.6437	12.5635	12.5565	12.8252	16.2708	16.192	16.7651	12.4118	13.2007	12.6488	11.1013	12.2527	11.3856	13.9088	14.0667	13.1032	12.9012	13.7713	12.9466	14.3782	14.1278	13.6478	13.5672	13.8758	13.7217	11.4541	14.6947	12.6484	16.4093	12.7538	11.5799	13.6929	13.2064	14.0513	13.7216
B5XI00	6	4	71.9074	0.0188151	1.28295	11083.6	Aspartyl/glutamyl-tRNA(Asn/Gln) amidotransferase subunit C OS=Streptococcus pyogenes serotype M49 (strain NZ131) OX=471876 GN=gatC PE=3 SV=1	4.02202	4.22736	3.74414	3.77954	4.39963	3.33386	4.10735	3.86926	3.47372	3.56541	3.50292	3.26062	4.04482	3.92939	3.48655	4.39169	4.63308	3.89404	4.25015	4.86109	4.14028	3.70236	3.9485	3.55557	3.8183	4.19408	3.64496	3.55472	3.43472	3.40267	3.99784	3.83768	3.81677	3.44298	3.82025	4.30627	4.41717	3.73548	3.88578	3.46404
B5XKQ2	7	6	80.9023	0.572307	1.30337	15552.8	ATP synthase epsilon chain OS=Streptococcus pyogenes serotype M49 (strain NZ131) OX=471876 GN=atpC PE=3 SV=1	4.07703	3.58477	4.56095	3.6388	3.19177	4.49043	3.57639	3.14691	4.26112	3.0805	2.70813	3.69999	4.23046	3.50778	4.62889	3.55153	3.08584	3.9563	3.42911	3.29934	4.65776	4.19402	3.35238	4.4287	3.95563	3.24843	4.11702	3.74226	3.09155	3.85268	4.07425	3.77366	3.66147	3.16287	4.12238	3.53122	3.7954	3.9917	3.7737	3.56216
B5XKQ0	20	17	208.821	0.00884957	1.33818	32044.5	ATP synthase gamma chain OS=Streptococcus pyogenes serotype M49 (strain NZ131) OX=471876 GN=atpG PE=3 SV=1	5.33047	5.31978	6.43937	5.77211	5.55898	6.4294	5.52946	5.56932	5.87159	5.0015	4.71892	5.81905	5.6433	5.15423	6.36779	5.12173	4.44524	5.61554	6.1713	5.65497	6.49244	6.58549	5.69725	6.5419	6.47748	6.55146	7.288	6.61038	6.10334	6.75349	5.69654	5.92016	5.65679	5.17982	5.72177	5.06084	6.10624	6.27488	6.77231	6.48907
B5XKP9	26	21	331.033	0.00349012	1.17584	54742.5	ATP synthase subunit alpha OS=Streptococcus pyogenes serotype M49 (strain NZ131) OX=471876 GN=atpA PE=3 SV=1	22.3948	26.1146	23.2318	22.3873	24.4872	23.4622	21.123	21.2606	22.3181	20.6842	21.3993	22.3476	22.6752	22.5805	22.7663	21.7936	22.2324	21.5871	24.5	27.1284	24.132	22.6293	22.8736	23.4903	22.9388	22.5301	22.6217	22.7536	22.335	24.0333	23.9137	23.4456	21.5673	21.477	22.674	21.871	25.2535	22.9978	22.6969	23.0406
B5XKP7	15	12	160.65	0.528229	1.2743	17812.3	ATP synthase subunit b OS=Streptococcus pyogenes serotype M49 (strain NZ131) OX=471876 GN=atpF PE=3 SV=1	9.68491	10.0225	8.44016	8.43939	10.4585	6.38487	8.72378	10.3817	7.09026	9.25363	10.1233	7.49952	9.28906	9.3869	7.44868	8.14912	8.79668	7.13634	7.02769	8.64384	6.41716	9.06884	10.2001	8.68295	8.76663	9.86514	8.26281	9.25322	10.0343	8.72035	9.38254	8.4276	8.73191	8.95883	8.70821	8.02738	7.36289	9.31728	8.96486	9.33597
B5XKQ1	43	33	587.213	4.66599e-05	1.22017	51107.3	ATP synthase subunit beta OS=Streptococcus pyogenes serotype M49 (strain NZ131) OX=471876 GN=atpD PE=3 SV=1	19.9847	23.1264	20.9489	20.2454	20.9064	20.1612	19.5888	20.0212	19.6916	22.2949	22.6773	23.1161	19.7241	21.0205	20.61	18.2648	19.0568	18.4809	19.4598	21.3906	19.8704	20.5933	20.502	20.2165	20.773	20.3744	20.6987	21.6465	22.1213	21.7859	21.3533	20.4377	19.7672	22.6961	20.4515	18.6008	20.2403	20.4373	20.6154	21.8512
B5XKP8	6	5	73.765	3.28659e-12	1.79521	19887.1	ATP synthase subunit delta OS=Streptococcus pyogenes serotype M49 (strain NZ131) OX=471876 GN=atpH PE=3 SV=1	1.74004	1.60408	1.67692	1.79052	1.69228	1.76476	1.62081	1.7166	1.76378	1.63065	1.51005	1.63682	1.74051	1.55465	1.66312	1.3324	1.40881	1.34289	1.33159	1.25608	1.41914	1.83894	1.846	1.79279	2.01725	1.94253	2.1131	2.4487	2.39124	2.35312	1.67368	1.74919	1.7004	1.59251	1.65276	1.36137	1.3356	1.82591	2.02429	2.39769
A0A0H3C1Q9	13	9	130.156	3.31603e-08	1.90077	46689.2	ATPase_ AAA family OS=Streptococcus pyogenes serotype M49 (strain NZ131) OX=471876 GN=Spy49_1655 PE=3 SV=1	0.721021	0.70634	0.78843	0.796127	0.737739	0.812652	0.843708	0.809685	0.960876	1.11741	1.06905	1.36241	0.825489	0.745593	0.893566	0.998815	0.928933	1.00575	1.37591	1.26818	1.56761	0.833792	0.713248	0.853466	0.719286	0.696768	0.820418	0.778539	0.750258	0.773704	0.738597	0.782173	0.871423	1.18296	0.821549	0.977833	1.4039	0.800169	0.745491	0.7675
A0A0H3BZC5	13	11	113.865	2.51897e-10	1.69489	27095.6	ATP-binding protein MtsB OS=Streptococcus pyogenes serotype M49 (strain NZ131) OX=471876 GN=mtsB PE=4 SV=1	0.746417	0.737713	0.791177	0.551136	0.599497	0.620742	0.814372	0.81273	0.827601	1.03833	0.946273	1.01769	0.799382	0.795915	0.820929	0.692115	0.637899	0.668754	0.707098	0.763087	0.704567	0.755608	0.716221	0.722501	0.613801	0.658556	0.70847	0.721857	0.737812	0.783384	0.758436	0.590458	0.818234	1.00076	0.805408	0.666256	0.724917	0.731443	0.660275	0.747684
B5XLV6	26	23	334.017	4.46861e-05	1.42726	35762.5	ATP-dependent 6-phosphofructokinase OS=Streptococcus pyogenes serotype M49 (strain NZ131) OX=471876 GN=pfkA PE=3 SV=1	31.9504	34.7927	35.3794	32.7993	34.656	36.677	30.6428	31.2699	35.2466	27.246	26.9598	31.3351	33.8656	33.7839	35.9609	40.5984	36.8735	39.7737	32.4192	31.4244	37.0765	34.0785	31.4992	33.9746	35.5638	33.9435	35.9859	41.3384	38.9934	41.7576	34.0408	34.7108	32.3864	28.5137	34.5368	39.0819	33.6401	33.1841	35.1644	40.6964
B5XL03	25	21	298.071	8.91377e-09	1.58625	45248.7	ATP-dependent Clp protease ATP-binding subunit ClpX OS=Streptococcus pyogenes serotype M49 (strain NZ131) OX=471876 GN=clpX PE=3 SV=1	8.6637	10.0622	8.85956	8.40074	9.75407	8.45775	8.32686	8.9046	8.09551	6.79522	7.27383	6.7464	8.50909	9.19071	8.46457	10.5829	10.9217	10.3034	10.8092	11.6163	10.593	8.50391	8.70614	8.61075	7.89318	8.00663	7.91649	7.9072	7.995	7.96784	9.19517	8.87086	8.44232	6.93848	8.72146	10.6026	11.0062	8.60693	7.93877	7.95668
B5XJZ8	7	5	67.1985	3.68646e-09	1.51372	21649	ATP-dependent Clp protease proteolytic subunit OS=Streptococcus pyogenes serotype M49 (strain NZ131) OX=471876 GN=clpP PE=3 SV=1	5.03947	5.28779	5.51634	6.68756	6.3338	6.82052	5.68304	5.78478	5.18653	6.66424	6.59921	7.29895	5.46711	4.99373	5.22583	5.25419	5.02977	5.31476	4.69471	5.02847	5.63742	5.6519	5.71277	5.49667	6.47587	6.76504	6.86506	7.60922	7.47191	8.17047	5.2812	6.61396	5.55145	6.85413	5.22889	5.19957	5.1202	5.62045	6.70199	7.75053
A0A0H3BYK1	21	19	167.093	5.56378e-08	1.83456	87247.9	ATP-dependent DNA helicase OS=Streptococcus pyogenes serotype M49 (strain NZ131) OX=471876 GN=pcrA PE=3 SV=1	0.861624	0.829304	0.949121	0.789395	0.833187	1.00743	0.86384	0.907854	1.09084	0.850401	0.857901	1.02153	0.945824	0.9063	1.0727	1.38882	1.27986	1.50388	1.32145	1.32234	1.48742	0.903109	0.814915	0.91656	0.800359	0.769585	0.768009	0.733006	0.742974	0.79844	0.880016	0.876672	0.954178	0.909943	0.974942	1.39086	1.37707	0.878194	0.779318	0.75814
B5XKR3	15	14	107.421	0.00100825	1.38029	124461	ATP-dependent helicase/deoxyribonuclease subunit B OS=Streptococcus pyogenes serotype M49 (strain NZ131) OX=471876 GN=rexB PE=3 SV=1	0.87462	0.823764	0.84334	0.912665	0.866632	1.04464	1.00242	1.12348	1.24433	1.14531	1.0023	1.18377	1.04406	0.971581	1.05827	0.818671	0.772743	0.936833	0.784194	0.756753	0.900745	1.04173	0.837399	1.08251	0.908843	0.78018	0.892297	0.918791	0.83739	0.921335	0.847241	0.941313	1.12341	1.11046	1.02463	0.842749	0.813897	0.987212	0.86044	0.892505
A0A0H3C0R8	4	4	33.2249	7.94642e-10	8.40089	37541.2	ATP-dependent protease La OS=Streptococcus pyogenes serotype M49 (strain NZ131) OX=471876 GN=Spy49_1188c PE=4 SV=1	0.57372	0.630886	0.538398	0.627946	0.727764	0.525763	0.936308	1.08704	0.758454	0.756049	0.792915	0.637466	0.674168	0.778205	0.628657	0.579186	0.639523	0.568739	0.377444	0.42769	0.360074	0.500174	0.577989	0.486565	0.398072	0.454759	0.404363	0.105998	0.12019	0.104944	0.581001	0.627157	0.927268	0.72881	0.693677	0.595816	0.388403	0.521576	0.419064	0.110377
A0A0H3C173	5	5	31.4807	0.000456998	1.18214	91552.4	ATP-dependent RecD-like DNA helicase OS=Streptococcus pyogenes serotype M49 (strain NZ131) OX=471876 GN=recD PE=3 SV=1	0.391552	0.379202	0.408169	0.433134	0.410357	0.441239	0.371029	0.345151	0.401158	0.361556	0.353831	0.371392	0.377145	0.372443	0.378402	0.40347	0.399674	0.387098	0.404362	0.399935	0.393959	0.411565	0.392103	0.411213	0.370204	0.370209	0.372394	0.359137	0.364481	0.39951	0.392974	0.428243	0.372446	0.36226	0.375997	0.396747	0.399419	0.40496	0.370935	0.374376
A0A0H3BWD2	42	42	521.216	8.62336e-07	1.51373	71795.2	ATP-dependent zinc metalloprotease FtsH OS=Streptococcus pyogenes serotype M49 (strain NZ131) OX=471876 GN=ftsH PE=3 SV=1	17.3322	15.3749	16.3833	19.7399	17.2701	18.034	17.1455	14.5535	15.9378	16.8719	14.3831	14.6242	18.1222	16.2111	16.3839	23.9971	21.489	23.0615	23.9896	21.2441	24.215	19.2205	16.2295	16.5439	17.4526	16.0365	16.6791	14.57	16.2589	15.6848	16.3634	18.348	15.8789	15.293	16.9057	22.8492	23.1496	17.3313	16.7228	15.5045
A0A0H3BZ83	17	15	172.855	1.59665e-11	1.70588	47915	ATP-grasp domain-containing protein OS=Streptococcus pyogenes serotype M49 (strain NZ131) OX=471876 GN=Spy49_0474 PE=4 SV=1	2.42243	2.7175	2.48592	3.45728	3.77482	3.64015	2.7441	2.94725	3.05375	3.30061	3.43946	3.44425	2.59834	2.69935	2.73267	2.53395	2.71103	2.53454	2.72359	3.12101	2.67141	2.77776	2.82639	2.84225	3.45623	3.5363	3.52183	4.26135	4.25738	4.49004	2.54195	3.62408	2.91503	3.39477	2.67679	2.59317	2.83867	2.81547	3.50479	4.33626
A0A0H3BYF5	6	6	38.401	3.33067e-16	2.78075	37807.6	Bac_luciferase domain-containing protein OS=Streptococcus pyogenes serotype M49 (strain NZ131) OX=471876 GN=Spy49_0964c PE=4 SV=1	0.387697	0.397482	0.377627	0.308021	0.328225	0.304202	0.570718	0.650702	0.621282	0.733037	0.745937	0.723855	0.549895	0.599249	0.557336	0.60731	0.672058	0.60932	0.438699	0.463352	0.416197	0.398016	0.367853	0.394035	0.27195	0.267467	0.252755	0.329019	0.365474	0.340664	0.387602	0.313483	0.614234	0.734276	0.568827	0.629563	0.439416	0.386635	0.264057	0.345053
A0A0H3BWX7	17	15	219.944	0.619142	1.24155	41854.7	Beta sliding clamp OS=Streptococcus pyogenes serotype M49 (strain NZ131) OX=471876 GN=dnaN PE=3 SV=1	15.1711	14.0431	17.7256	16.4535	14.2974	20.2844	13.4854	12.5298	17.3098	13.9171	12.2283	17.8394	15.8282	13.8022	18.4567	16.6436	14.7117	19.0765	16.8344	15.3579	19.5641	18.5741	16.2576	18.9587	17.0821	14.7032	19.6853	16.9901	14.8754	19.0373	15.6466	17.0118	14.4417	14.6616	16.029	16.8106	17.2521	17.9301	17.1569	16.9676
A0A0H3BZL6	2	2	20.214	3.4861e-14	13.2786	66127.2	Beta-glucoside permease IIABC component OS=Streptococcus pyogenes serotype M49 (strain NZ131) OX=471876 GN=Spy49_0485 PE=4 SV=1	0.293821	0.258332	0.23714	0.0220356	0.0250716	0.0247798	0.142451	0.17202	0.133047	0.214844	0.229993	0.186699	0.312228	0.356424	0.285906	0.173397	0.205544	0.159232	0.0268375	0.0221705	0.0259057	0.130397	0.143022	0.116354	0.024309	0.0330991	0.0260209	0.0466825	0.0620821	0.0607943	0.263098	0.0239624	0.149173	0.210512	0.318186	0.179391	0.0249712	0.129924	0.0278097	0.0565196
B5XM84	8	7	69.0061	0.000694847	1.68934	31324.4	Bifunctional protein FolD OS=Streptococcus pyogenes serotype M49 (strain NZ131) OX=471876 GN=folD PE=3 SV=1	0.687885	0.974286	0.974825	0.778588	1.184	0.793514	1.05767	1.15271	0.882336	0.913645	1.03328	0.716243	1.07487	1.13922	0.997052	1.47014	1.30186	1.23133	1.33327	1.47867	1.29537	0.912626	0.831639	0.687041	0.876074	0.829536	1.02089	0.97172	0.809281	0.850196	0.878999	0.918699	1.03091	0.887723	1.07038	1.33445	1.3691	0.810435	0.908833	0.877066
B5XK49	20	16	209.374	3.29739e-10	1.54788	49573.2	Bifunctional protein GlmU OS=Streptococcus pyogenes serotype M49 (strain NZ131) OX=471876 GN=glmU PE=3 SV=1	8.83833	9.98787	8.50493	7.48927	8.3018	7.99425	7.85955	8.1278	7.93824	7.87725	7.90701	7.44486	8.47379	9.09323	8.2437	11.274	11.599	11.7556	11.6875	12.1337	12.1277	8.84589	8.60854	8.00828	7.43287	8.35313	7.64962	7.63522	8.17553	7.41394	9.11038	7.92844	7.9752	7.74304	8.60357	11.5429	11.983	8.48757	7.81187	7.74157
B5XKV8	13	11	163.397	0	6.621	19512.6	Bifunctional protein PyrR OS=Streptococcus pyogenes serotype M49 (strain NZ131) OX=471876 GN=pyrR PE=3 SV=1	2.32763	2.67699	2.54201	2.33023	2.71804	2.47678	2.23946	2.36603	2.39915	2.50997	2.65159	2.91808	3.01261	3.06969	3.16124	4.68929	4.76015	5.17997	14.2272	15.9877	16.1628	2.75532	2.87956	2.9382	2.57422	2.76054	2.60725	2.79657	2.90457	3.09034	2.51554	2.50835	2.33488	2.69321	3.08118	4.87647	15.4592	2.85769	2.64734	2.93049
B5XJ20	27	22	290.042	1.05249e-13	1.76812	56233.7	Bifunctional purine biosynthesis protein PurH OS=Streptococcus pyogenes serotype M49 (strain NZ131) OX=471876 GN=purH PE=3 SV=1	8.29126	8.57079	8.16078	7.96481	7.35096	7.47746	6.1001	5.85578	5.92364	4.88651	4.65766	5.07916	7.13258	6.59323	6.69926	8.45376	8.37604	7.95972	8.74729	8.51796	8.59064	7.8408	8.18758	7.80303	7.74543	7.36786	7.73956	5.91982	5.42133	6.15348	8.34094	7.59775	5.95984	4.87445	6.80836	8.26318	8.61863	7.9438	7.61761	5.83154
A0A0H3BZD1	6	6	63.4164	5.90671e-07	5.16018	17958.3	Biotin carboxyl carrier protein of acetyl-CoA carboxylase OS=Streptococcus pyogenes serotype M49 (strain NZ131) OX=471876 GN=accB PE=4 SV=1	3.27207	3.2667	4.46364	1.8195	1.75995	2.75586	2.67246	2.72369	5.23197	2.89465	3.06566	3.88488	4.72144	4.0183	6.50172	10.0793	7.32086	15.2912	7.30658	6.96085	12.0679	3.2428	2.71276	3.93659	2.23747	1.96446	2.68209	2.3993	1.92145	2.30604	3.66747	2.11177	3.5427	3.28173	5.08049	10.8971	8.77844	3.29739	2.29467	2.20893
A0A0H3BYC7	21	20	235.882	3.33067e-16	11.2353	49572.6	Biotin carboxylase OS=Streptococcus pyogenes serotype M49 (strain NZ131) OX=471876 GN=accC PE=4 SV=1	6.31252	6.0293	7.11157	1.49661	1.41303	1.73796	5.19694	4.78613	6.17841	4.64507	4.12634	5.43229	9.43666	8.18951	10.177	16.6319	14.9265	18.6369	16.9117	16.6253	18.6799	5.20118	4.38035	4.91306	2.79677	2.59486	3.2538	3.70847	3.2062	3.9922	6.48447	1.5492	5.38716	4.73457	9.26772	16.7318	17.4056	4.83153	2.88181	3.63563
A0A0H3C117	7	7	55.132	3.36067e-06	1.30871	28231.5	Biotin-protein ligase / Biotin operon repressor OS=Streptococcus pyogenes serotype M49 (strain NZ131) OX=471876 GN=birA PE=4 SV=1	1.11148	1.12274	1.19444	1.32199	1.29321	1.41126	1.18986	1.1862	1.28907	1.30993	1.25847	1.31805	1.30599	1.16498	1.30313	1.40975	1.3278	1.485	1.50376	1.40786	1.57551	1.1755	1.14526	1.15486	1.18677	1.13199	1.21828	1.2142	1.14064	1.22875	1.14289	1.34215	1.22171	1.29548	1.25803	1.40752	1.49571	1.15854	1.17901	1.19453
A0A0H3BXW6	18	14	243.368	2.45377e-08	1.46344	37083.1	Branched-chain-amino-acid aminotransferase OS=Streptococcus pyogenes serotype M49 (strain NZ131) OX=471876 GN=bcaT PE=3 SV=1	22.9538	25.8229	22.0252	30.0202	34.3039	31.6727	23.8069	25.7325	24.5853	21.1027	21.895	22.599	22.1715	23.6059	21.9399	22.509	23.649	22.9383	28.6799	31.5813	26.4077	23.8157	25.3592	24.2038	29.3502	31.59	30.0277	28.9609	30.353	31.5574	23.6006	31.9989	24.7082	21.8656	22.5724	23.0321	28.8896	24.4595	30.3226	30.2904
A0A0H3BVY9	8	7	57.6456	2.36609e-08	2.05624	177964	C5a peptidase OS=Streptococcus pyogenes serotype M49 (strain NZ131) OX=471876 GN=prtS PE=3 SV=1	0.390762	0.390279	0.348886	0.444264	0.50741	0.380781	0.28904	0.30338	0.247134	0.286394	0.303257	0.256999	0.40495	0.406387	0.377273	0.219747	0.231969	0.19629	0.268829	0.282736	0.257016	0.410587	0.466977	0.408781	0.391672	0.438951	0.365145	0.413756	0.44166	0.403011	0.376642	0.444152	0.279851	0.282216	0.396203	0.216002	0.269527	0.428782	0.398589	0.419476
A0A0H3C0M3	5	4	37.0152	2.62296e-05	2.85424	124093	C5a peptidase OS=Streptococcus pyogenes serotype M49 (strain NZ131) OX=471876 GN=scpA PE=3 SV=1	0.248859	0.289273	0.303696	0.258355	0.264613	0.360194	0.121671	0.116774	0.160933	0.101824	0.0843232	0.132854	0.275023	0.254009	0.381475	0.183761	0.16697	0.233507	0.209908	0.237648	0.26413	0.293129	0.236435	0.339009	0.26619	0.238309	0.305527	0.244201	0.195921	0.249063	0.28061	0.294387	0.133126	0.106334	0.303502	0.194746	0.237229	0.289524	0.270009	0.229728
A0A0H3C0U8	7	6	56.3286	4.07006e-10	1.75431	28496.7	cAMP factor OS=Streptococcus pyogenes serotype M49 (strain NZ131) OX=471876 GN=cfa PE=4 SV=1	2.14532	2.33965	2.06713	2.52134	2.86119	2.4736	2.72281	2.98296	2.78686	3.03946	3.29031	2.92896	1.68994	1.85061	1.73714	1.95897	1.95284	2.01804	2.37022	2.39536	2.17903	2.28063	2.33282	2.16105	2.69241	2.99612	2.74638	2.56596	2.72143	2.564	2.18403	2.61871	2.83088	3.08624	1.75923	1.97661	2.31487	2.25817	2.81164	2.61713
A0A0H3BY05	20	19	354.161	1.45951e-11	4.9013	33274.9	Carbamate kinase OS=Streptococcus pyogenes serotype M49 (strain NZ131) OX=471876 GN=arcC PE=3 SV=1	24.6519	32.9315	35.1581	15.6886	17.2657	20.0582	34.9856	47.1447	52.1267	79.8833	81.3784	98.5687	42.3744	42.3202	53.18	27.8939	28.3244	31.1124	32.6586	35.3021	37.5072	44.2276	43.9045	49.416	15.9161	17.1667	19.9458	18.9214	17.1778	21.4886	30.9139	17.6708	44.7523	86.6102	45.9582	29.1102	35.156	45.8494	17.6762	19.196
B5XKW2	28	26	258.266	0	3.87061	117281	Carbamoyl-phosphate synthase large chain OS=Streptococcus pyogenes serotype M49 (strain NZ131) OX=471876 GN=carB PE=3 SV=1	0.600797	0.636091	0.574965	0.552138	0.563995	0.48492	0.535059	0.533516	0.511235	0.741692	0.742843	0.681997	0.74746	0.730862	0.749942	1.6381	1.65489	1.48082	1.99278	2.1039	2.01814	0.574171	0.634391	0.58664	0.545369	0.570974	0.559835	0.589418	0.605072	0.56815	0.603951	0.533684	0.526604	0.722177	0.742755	1.59127	2.03828	0.598401	0.558726	0.587546
A0A0H3BZK5	5	4	33.3045	7.07252e-10	4.98459	40042.4	Carbamoyl-phosphate synthase small chain OS=Streptococcus pyogenes serotype M49 (strain NZ131) OX=471876 GN=carA PE=3 SV=1	0.225923	0.203475	0.228489	0.166938	0.143934	0.168214	0.190056	0.204372	0.216536	0.223245	0.255559	0.242848	0.2648	0.233777	0.313216	0.710823	0.566502	0.827587	0.695547	0.651557	1.04095	0.206958	0.191501	0.212457	0.1713	0.15028	0.17979	0.170782	0.169099	0.210125	0.219296	0.159696	0.203655	0.240551	0.270598	0.701637	0.796018	0.203638	0.167124	0.183335
A0A0H3BXE5	7	7	51.575	3.48044e-12	1.70787	60633.6	Cardiolipin synthetase OS=Streptococcus pyogenes serotype M49 (strain NZ131) OX=471876 GN=Spy49_0958c PE=4 SV=1	0.314005	0.316744	0.312499	0.377155	0.395409	0.356109	0.432392	0.440712	0.381742	0.379816	0.366824	0.364643	0.476981	0.478584	0.453097	0.409102	0.412395	0.421774	0.420495	0.456581	0.443813	0.324448	0.316434	0.292852	0.259149	0.281264	0.284392	0.287461	0.29122	0.284989	0.314416	0.376225	0.418282	0.370428	0.469554	0.414423	0.440296	0.311245	0.274935	0.28789
A0A0H3BX75	27	25	336.411	5.39685e-11	1.44094	36770.9	Catabolite control protein A OS=Streptococcus pyogenes serotype M49 (strain NZ131) OX=471876 GN=ccpA PE=4 SV=1	11.4259	12.8594	12.432	9.74158	9.96034	9.85853	11.6048	12.0509	12.6556	13.7178	14.27	13.8827	11.8422	11.5189	11.5787	11.6557	11.4175	11.7571	13.0974	12.9301	12.8526	12.6118	11.988	12.5216	10.8585	10.2199	10.6241	9.60784	9.3485	10.1013	12.2391	9.85348	12.1038	13.9568	11.6466	11.6101	12.96	12.3738	10.5675	9.68588
A0A0H3BWW7	3	2	31.7183	1.01789e-05	2.13298	17672.6	CBS domain protein OS=Streptococcus pyogenes serotype M49 (strain NZ131) OX=471876 GN=Spy49_0300 PE=4 SV=1	0.333744	0.412474	0.45686	0.251377	0.271868	0.378745	0.473908	0.494132	0.547108	0.584084	0.600122	0.739719	0.414836	0.391305	0.506163	0.434354	0.436207	0.49157	0.313403	0.342538	0.362694	0.364232	0.332026	0.42276	0.380042	0.30768	0.415626	0.520654	0.485334	0.594506	0.401026	0.300663	0.505049	0.641308	0.437434	0.454044	0.339545	0.373006	0.367783	0.533498
A0A0H3C232	6	6	49.4653	2.22911e-09	1.57044	20142.3	CDP-diacylglycerol--glycerol-3-phosphate 3-phosphatidyltransferase OS=Streptococcus pyogenes serotype M49 (strain NZ131) OX=471876 GN=pgsA PE=3 SV=1	1.69131	1.56055	1.49462	1.38676	1.45128	1.30644	1.72257	1.80517	1.61937	1.59749	1.55419	1.56389	1.58532	1.6933	1.54154	1.90419	2.05225	1.80366	2.07606	2.17546	2.09834	1.38707	1.43347	1.37645	1.33971	1.41147	1.29219	1.28887	1.50469	1.39125	1.58216	1.38149	1.7157	1.57186	1.60672	1.92003	2.11662	1.399	1.34779	1.39493
B5XMJ7	7	6	86.6288	0.000116027	2.23276	12461.2	Cell cycle protein GpsB OS=Streptococcus pyogenes serotype M49 (strain NZ131) OX=471876 GN=gpsB PE=3 SV=1	5.54809	6.29157	7.48577	7.40256	7.1409	10.0054	5.75229	5.32016	7.92676	4.01841	4.65993	5.69872	5.79609	6.081	6.93416	6.20882	5.54864	7.29669	3.56741	3.13478	4.29264	6.72515	5.53044	7.36696	7.24256	7.0102	6.7724	5.08104	5.21595	5.13056	6.44181	8.18295	6.33307	4.79235	6.27042	6.35138	3.66494	6.54085	7.00839	5.14252
A0A0H3BWI7	15	10	155.052	0.322304	1.21903	26160.3	Cell division ATP-binding protein FtsE OS=Streptococcus pyogenes serotype M49 (strain NZ131) OX=471876 GN=ftsE PE=3 SV=1	3.79732	4.38908	3.56113	4.18954	4.81086	3.33048	4.02641	4.2779	3.29235	4.06207	4.14487	3.30437	3.31744	3.73004	3.06784	3.35645	3.70213	3.09522	3.51339	3.82771	3.19255	3.47241	3.92747	3.17149	3.81646	4.37405	3.69789	3.92778	4.46444	3.81561	3.91584	4.1103	3.86555	3.8371	3.37177	3.3846	3.51122	3.52379	3.9628	4.06928
A0A0H3C0R3	6	5	52.7599	1.50617e-06	1.75945	43437.7	Cell division protein DivIB OS=Streptococcus pyogenes serotype M49 (strain NZ131) OX=471876 GN=ftsQ PE=3 SV=1	0.325416	0.368807	0.391232	0.323621	0.346552	0.358071	0.398598	0.371509	0.452528	0.390368	0.370725	0.361926	0.367486	0.392911	0.394823	0.44687	0.449954	0.501001	0.41122	0.395241	0.495168	0.355218	0.35336	0.372888	0.30223	0.317095	0.294516	0.260508	0.291342	0.242616	0.361819	0.342748	0.407545	0.37434	0.385073	0.465942	0.433876	0.360489	0.304614	0.264822
A0A0H3BZJ8	32	26	371.604	6.15865e-10	1.49779	49336.6	Cell division protein FtsA OS=Streptococcus pyogenes serotype M49 (strain NZ131) OX=471876 GN=ftsA PE=3 SV=1	16.3426	15.4591	16.1075	14.2958	14.2441	13.924	16.5823	15.1261	16.5768	16.4637	15.4974	16.3932	17.0678	15.6121	16.2973	21.1141	20.2326	19.6948	16.5524	16.6431	17.4253	15.1326	14.9692	15.2036	13.6491	13.3996	13.7055	13.9748	13.1276	14.7998	15.9697	14.1546	16.0951	16.1181	16.3258	20.3472	16.8736	15.1018	13.5847	13.9674
A0A0H3C1K9	9	9	66.4437	3.36593e-07	3.23683	82799.9	Cell division protein ftsI / Peptidoglycan synthetase OS=Streptococcus pyogenes serotype M49 (strain NZ131) OX=471876 GN=ftsI PE=3 SV=1	0.593372	0.564955	0.744959	0.681898	0.66125	0.939602	0.705139	0.674324	0.837436	0.681362	0.68264	0.702361	0.737935	0.710094	0.876649	0.946096	0.829762	1.07915	0.416659	0.436595	0.525121	0.690272	0.618752	0.807794	0.461601	0.456003	0.539634	0.284409	0.284688	0.312943	0.634429	0.760917	0.738966	0.688788	0.774893	0.951671	0.459459	0.705606	0.485746	0.294013
A0A0H3BXK3	4	4	38.7243	0.00730643	2.18596	35228.2	Cell division protein FtsX OS=Streptococcus pyogenes serotype M49 (strain NZ131) OX=471876 GN=ftsX PE=3 SV=1	2.34301	2.11396	3.14886	2.51515	2.51037	3.75627	2.86089	2.25401	3.51192	1.88187	1.92459	2.84155	2.73797	2.50629	3.64956	2.55669	2.03201	3.60311	1.23399	1.09273	1.7419	2.92947	2.22842	3.34726	2.91741	2.61275	3.32144	2.22873	2.1468	2.40248	2.53527	2.92726	2.87561	2.216	2.96461	2.73061	1.35621	2.83505	2.95053	2.25934
A0A0H3BZ23	25	24	401.904	0.619199	1.19659	46435.9	Cell division protein FtsZ OS=Streptococcus pyogenes serotype M49 (strain NZ131) OX=471876 GN=ftsZ PE=3 SV=1	43.7919	49.7506	42.4216	43.8474	55.4787	38.5473	44.8304	52.6083	39.6699	46.4259	48.9501	40.76	43.5692	46.6035	39.1028	49.5523	52.5706	44.6628	49.8368	56.4596	48.3934	43.7072	47.565	41.9141	43.8802	49.3948	42.4729	48.2433	50.0704	45.8111	45.3214	45.9578	45.7029	45.3787	43.0918	48.9286	51.5633	44.3954	45.2493	48.0416
A0A0H3C1B5	15	14	186.529	0.0343852	1.88305	25922.8	Cell division protein SepF OS=Streptococcus pyogenes serotype M49 (strain NZ131) OX=471876 GN=sepF PE=3 SV=1	4.62787	7.22316	6.86953	5.28387	6.51156	4.09473	8.43108	7.4156	5.33044	7.42937	7.62556	5.30199	8.56235	8.02539	6.44507	11.1597	10.6494	8.11286	7.65012	5.56964	6.1108	7.24734	6.4083	4.42368	6.37904	6.43101	5.29575	5.92647	5.0278	5.97035	6.24019	5.29672	7.05904	6.78564	7.67761	9.97399	6.44352	6.02644	6.03527	5.64154
A0A0H3C028	5	5	40.0897	0	4.43573	46977	Cell surface/Fibronectin-binding protein OS=Streptococcus pyogenes serotype M49 (strain NZ131) OX=471876 GN=Spy49_1668c PE=4 SV=1	0.852251	0.89269	0.859064	0.900002	1.01006	0.937303	0.431795	0.486875	0.477252	0.205601	0.193572	0.254018	0.887493	0.848044	0.83097	0.489641	0.535509	0.514845	0.474013	0.493016	0.560498	0.93812	0.990766	0.968501	0.872554	0.876975	0.843261	0.837844	0.855823	0.790745	0.868001	0.949122	0.465307	0.217731	0.855502	0.513332	0.509176	0.965796	0.864263	0.828137
A0A0H3C021	5	5	30.2697	8.37128e-07	1.69239	111609	Cell wall surface anchor family protein OS=Streptococcus pyogenes serotype M49 (strain NZ131) OX=471876 GN=Spy49_0661 PE=3 SV=1	0.436908	0.426973	0.445625	0.320277	0.270256	0.361588	0.276932	0.300868	0.289802	0.335211	0.364786	0.384851	0.451137	0.467002	0.550184	0.4189	0.389308	0.410474	0.42199	0.350876	0.437273	0.416384	0.418694	0.456434	0.326641	0.358454	0.317803	0.320485	0.317382	0.311039	0.436502	0.317374	0.289201	0.361616	0.489441	0.406227	0.40338	0.430504	0.3343	0.316302
A0A0H3BZ18	17	14	237.766	0.138014	1.50843	28991	Cell-division initiation protein OS=Streptococcus pyogenes serotype M49 (strain NZ131) OX=471876 GN=divIVA PE=4 SV=1	22.9477	20.5748	26.705	22.5649	18.7075	24.9232	22.2394	19.9222	26.4094	20.703	18.6667	24.3401	24.2827	20.6934	25.6578	32.6855	25.2332	34.1772	23.1249	19.5362	26.3408	24.1169	20.5398	24.6766	23.5517	18.8569	24.8854	21.6198	16.3785	23.056	23.4092	22.0652	22.857	21.2366	23.5446	30.6986	23.0007	23.1111	22.4314	20.3514
A0A0H3C1S1	18	17	235.037	0.0265227	1.63442	40936.4	Chaperone protein DnaJ OS=Streptococcus pyogenes serotype M49 (strain NZ131) OX=471876 GN=dnaJ PE=3 SV=1	7.91004	7.50894	10.2655	12.9045	10.4175	15.2578	8.85259	7.51404	11.2503	9.44094	8.51914	11.0466	7.99637	6.69361	8.91455	8.11449	6.71346	9.92878	9.29496	6.90519	11.2601	10.9429	8.98297	12.2605	12.1192	10.5087	12.8783	11.239	10.0535	11.1385	8.56149	12.8599	9.20565	9.66889	7.86818	8.25224	9.1534	10.7288	11.8354	10.8104
B5XHZ0	63	59	939.659	5.0239e-08	1.79525	64978.2	Chaperone protein DnaK OS=Streptococcus pyogenes serotype M49 (strain NZ131) OX=471876 GN=dnaK PE=3 SV=1	96.1649	101.701	111.706	167.2	163.141	185.687	107.752	107.157	125.882	106.258	99.8241	123.018	94.9674	87.2362	105.237	103.824	98.6939	112.302	122.246	120.655	136.179	140.095	131.439	148.122	161.414	146.873	165.944	149.389	133.531	155.717	103.191	172.009	113.597	109.7	95.8134	104.94	126.36	139.885	158.077	146.212
B5XKU4	4	4	30.1576	7.34742e-05	1.52471	42566	Chorismate synthase OS=Streptococcus pyogenes serotype M49 (strain NZ131) OX=471876 GN=aroC PE=3 SV=1	1.78614	1.93526	1.84856	1.85926	1.93059	1.92089	1.62006	1.71805	1.76813	1.32997	1.64377	1.23939	1.48807	1.81311	1.57495	1.84694	1.8106	1.90061	2.15679	2.03685	2.23017	1.73349	1.93768	1.86303	1.91347	1.93817	1.79725	1.7387	2.03676	1.76657	1.85665	1.90358	1.70208	1.40438	1.62538	1.85272	2.14127	1.84473	1.88296	1.84734
B5XIP2	20	18	203.965	0.292451	1.15494	51538.8	Chromosomal replication initiator protein DnaA OS=Streptococcus pyogenes serotype M49 (strain NZ131) OX=471876 GN=dnaA PE=3 SV=1	4.07441	4.53799	3.49195	3.61589	4.18392	3.59203	3.89392	4.30815	3.78672	4.13183	4.32749	4.25326	3.5557	4.0653	3.67644	4.24241	4.68605	3.95494	3.65609	4.30187	3.31809	3.60939	3.92864	3.64372	3.82689	4.2666	3.68001	4.05974	4.74463	4.10993	4.03478	3.79728	3.99626	4.23752	3.76581	4.29447	3.75868	3.72725	3.9245	4.30477
A0A0H3BZH4	28	25	211.58	0.00213018	1.40934	134230	Chromosome partition protein Smc OS=Streptococcus pyogenes serotype M49 (strain NZ131) OX=471876 GN=smc PE=3 SV=1	1.56139	1.6621	1.65502	1.6667	1.78993	2.00225	1.77463	1.78906	2.08436	1.56257	1.49662	1.99921	1.69906	1.62311	1.79551	2.07196	1.91124	2.43176	1.68819	1.84904	1.80607	1.65085	1.5972	1.82872	1.79866	1.91464	2.07567	2.33483	2.07932	2.46135	1.62617	1.81963	1.88268	1.68613	1.70589	2.13832	1.7811	1.69226	1.92966	2.29183
A0A0H3C244	6	6	47.7813	1.36531e-05	1.51936	30274.4	Chromosome partitioning protein parB OS=Streptococcus pyogenes serotype M49 (strain NZ131) OX=471876 GN=parB PE=3 SV=1	0.713846	0.759605	0.696783	0.613375	0.675661	0.569136	0.615799	0.623411	0.544332	0.521034	0.520346	0.4678	0.614948	0.681872	0.573655	0.621658	0.673961	0.607433	0.465159	0.495271	0.467961	0.617419	0.653146	0.573954	0.568952	0.620155	0.568489	0.540219	0.601962	0.532419	0.723412	0.619391	0.594514	0.50306	0.623492	0.63435	0.47613	0.614839	0.585865	0.5582
A0A0H3C0I9	12	11	169.398	5.16831e-12	5.5642	27144	Class B acid phosphatase OS=Streptococcus pyogenes serotype M49 (strain NZ131) OX=471876 GN=Spy49_0866 PE=3 SV=1	7.2182	6.83681	8.35469	3.22226	2.65419	3.49986	9.16444	7.44651	10.7302	12.1019	10.2069	13.4865	8.9049	7.51878	9.54405	6.65698	5.56967	6.94643	5.90817	5.02447	6.5602	7.90989	7.2608	8.12704	4.2292	3.43746	4.29179	2.23766	1.93789	2.25758	7.4699	3.12544	9.11372	11.9318	8.65591	6.39103	5.83095	7.76591	3.98615	2.14438
A0A0H3BWK8	6	2	50.416	1.51122e-09	2.38716	17044.8	CoA-binding domain protein OS=Streptococcus pyogenes serotype M49 (strain NZ131) OX=471876 GN=Spy49_0164 PE=4 SV=1	0.62592	0.662141	0.559812	0.44772	0.467715	0.398285	0.546874	0.513725	0.43324	0.661154	0.713269	0.579704	0.570005	0.626653	0.523832	0.821308	0.961166	0.792927	0.980502	1.15787	0.997683	0.508307	0.61924	0.466318	0.448715	0.466627	0.41011	0.451505	0.507112	0.443992	0.615958	0.437907	0.497946	0.651376	0.573497	0.858467	1.04535	0.531288	0.441817	0.467536
A0A0H3BZ00	24	23	184.242	4.19859e-10	2.53661	44151.7	Collagen-like surface protein OS=Streptococcus pyogenes serotype M49 (strain NZ131) OX=471876 GN=sclA PE=4 SV=1	0.950198	1.19341	1.125	1.12826	1.2429	0.965865	0.626878	0.56831	0.498708	0.486495	0.456282	0.372766	1.14899	1.13621	0.97452	0.716745	0.716487	0.634495	0.924553	0.925848	0.898412	1.07071	1.10954	0.912929	1.13264	1.10798	1.07367	1.06617	1.03154	1.01325	1.08954	1.11234	0.564632	0.438514	1.08657	0.689242	0.916271	1.03106	1.10476	1.03698
A0A0H3BZL3	4	4	29.9893	3.67875e-11	4.40812	46714.7	Conserved hypothetical integral membrane protein OS=Streptococcus pyogenes serotype M49 (strain NZ131) OX=471876 GN=Spy49_1194c PE=4 SV=1	2.63159	2.49525	3.16198	1.5006	1.48235	1.77124	3.59117	3.40838	4.54254	7.0239	5.81279	8.12036	3.44086	3.05659	3.82028	1.89912	1.59509	2.0152	2.88421	2.74374	3.45187	3.39766	3.01974	3.47535	1.6585	1.51745	1.98802	1.83496	1.50188	1.78584	2.76294	1.58473	3.84736	6.98568	3.43924	1.83647	3.02661	3.29758	1.72132	1.70756
A0A0H3BY08	12	12	138.121	0.00547279	1.3418	26763	Conserved protein OS=Streptococcus pyogenes serotype M49 (strain NZ131) OX=471876 GN=Spy49_1200c PE=4 SV=1	4.38155	4.57344	4.2791	5.46183	6.50385	4.88384	4.88301	5.25252	4.54675	4.89339	5.05861	3.98135	4.58557	5.14585	4.20902	4.18371	4.63407	3.98788	4.61413	5.40384	4.77195	4.66723	5.09166	4.90351	5.31476	5.87925	5.44556	5.7057	6.24223	5.23472	4.41137	5.61651	4.89409	4.64445	4.64681	4.26856	4.92998	4.88747	5.54652	5.72755
A0A0H3BZ97	2	2	11.9112	0	79.6689	22706.6	Conserved protein OS=Streptococcus pyogenes serotype M49 (strain NZ131) OX=471876 GN=Spy49_1728 PE=4 SV=1	0.0116829	0.00942249	0.00953179	0.0125363	0.013354	0.00472386	0.0136753	0.0121872	0.00682265	0.394484	0.355525	0.360714	0.0116391	0.0160038	0.0150986	0.00573277	0.0049172	0.00329176	0.00550772	0.00654151	0.00220444	0.0114534	0.0146072	0.0138356	0.00922201	0.0144345	0.0170126	0.0116402	0.0174383	0.0159476	0.0102124	0.0102047	0.0108951	0.370241	0.0142472	0.00464724	0.00475123	0.0132987	0.0135564	0.0150087
A0A0H3BWY9	5	5	64.3993	1.9348e-08	2.44546	22879.1	Copper homeostasis protein CutC OS=Streptococcus pyogenes serotype M49 (strain NZ131) OX=471876 GN=cutC PE=3 SV=1	1.20447	1.12992	1.32259	1.01145	0.946221	1.20758	1.04219	1.13711	1.22469	1.2854	1.25989	1.69716	1.28096	1.31895	1.61647	1.9039	1.82327	2.13843	2.30774	2.16858	2.42859	1.43337	1.1302	1.44798	0.996391	0.98167	1.16348	0.983989	0.842803	0.996768	1.219	1.05508	1.13466	1.41415	1.40546	1.9552	2.30164	1.33718	1.04718	0.941187
A0A0H3BVT3	5	4	60.4683	7.90585e-07	1.67895	11556.6	CRM domain-containing protein OS=Streptococcus pyogenes serotype M49 (strain NZ131) OX=471876 GN=Spy49_0259 PE=4 SV=1	4.7761	5.16553	4.80092	4.44112	4.88304	4.79544	4.42398	4.40798	4.25534	3.76859	4.4893	3.48093	4.31632	5.09185	4.38244	5.20508	5.59467	5.1768	6.58674	6.33407	6.78809	4.44265	4.77259	4.54896	4.41844	4.42214	4.02878	3.94645	4.65523	3.92174	4.91418	4.70653	4.36243	3.91294	4.59687	5.32551	6.56963	4.58806	4.28979	4.17448
A0A0H3C1S0	8	7	88.8627	1.05449e-09	3.00074	6960.96	CsbD domain-containing protein OS=Streptococcus pyogenes serotype M49 (strain NZ131) OX=471876 GN=Spy49_1665c PE=3 SV=1	15.5933	14.1741	16.8992	17.1825	16.5633	19.9398	8.86539	8.89064	10.4393	10.659	9.0113	11.4336	17.781	14.242	17.5453	18.1357	15.0627	20.4414	27.0656	26.389	31.1521	21.6848	18.5628	21.2324	19.9009	18.018	21.6427	11.8507	10.1618	12.4818	15.5556	17.8952	9.39843	10.368	16.5228	17.8799	28.2023	20.4933	19.8539	11.4981
A0A0H3BYU1	23	20	243.103	2.92715e-09	1.64667	59860.5	CTP synthase OS=Streptococcus pyogenes serotype M49 (strain NZ131) OX=471876 GN=pyrG PE=3 SV=1	4.51769	4.85959	4.63388	4.50641	4.51597	4.84912	4.16394	3.8821	4.48484	3.42267	3.51009	3.78526	4.06891	4.09936	4.38676	5.50302	5.54293	5.89957	5.63716	5.96823	6.04362	4.52432	4.31867	4.5659	4.53287	4.14268	4.40439	4.40705	4.11638	4.74848	4.67039	4.62383	4.17696	3.57267	4.18501	5.64851	5.88301	4.46963	4.35998	4.42397
A0A0H3BZ52	2	2	27.1676	9.34993e-07	1.61606	12396.3	Cupin_2 domain-containing protein OS=Streptococcus pyogenes serotype M49 (strain NZ131) OX=471876 GN=Spy49_1223c PE=4 SV=1	0.215206	0.243263	0.195365	0.173917	0.185374	0.180975	0.20383	0.214134	0.209303	0.283333	0.307245	0.264114	0.202467	0.23265	0.210807	0.249412	0.289867	0.250152	0.282523	0.327588	0.262993	0.20326	0.226067	0.206028	0.178257	0.201845	0.18751	0.193116	0.199212	0.212668	0.217945	0.180089	0.209089	0.284897	0.215308	0.263144	0.291035	0.211785	0.189204	0.201666
A0A0H3C2R9	18	14	150.839	0.000491378	1.47547	74232.9	Cyclic-di-AMP phosphodiesterase OS=Streptococcus pyogenes serotype M49 (strain NZ131) OX=471876 GN=Spy49_1790c PE=3 SV=1	1.31557	1.60139	1.17795	1.39998	1.6491	1.49363	1.82656	1.94266	1.67392	1.65119	1.85984	1.56272	1.34009	1.4792	1.308	1.27802	1.42505	1.22633	1.58093	1.82244	1.41762	1.20938	1.31621	1.16349	1.26171	1.4055	1.26515	1.29042	1.45292	1.26947	1.36497	1.51424	1.81438	1.69125	1.37576	1.3098	1.607	1.22969	1.31079	1.33761
A0A0H3BWP6	5	5	47.5246	0.504115	1.51566	41183.4	Cysteine desulfurase OS=Streptococcus pyogenes serotype M49 (strain NZ131) OX=471876 GN=nifS PE=3 SV=1	1.10756	1.00282	1.36792	0.992963	0.970801	1.23533	1.05072	0.74178	1.20846	0.988316	0.656156	1.06443	1.14715	0.857535	1.2892	1.24081	0.922459	1.5392	1.32356	1.03084	1.75136	1.25079	1.04221	1.26356	1.26159	0.855329	1.27175	1.37186	1.06794	1.22054	1.15943	1.06637	1.00032	0.902967	1.09796	1.23416	1.36859	1.18552	1.12956	1.22011
A0A0H3BWS3	4	4	32.7167	0.29569	1.71689	45449.6	Cysteine desulfurase OS=Streptococcus pyogenes serotype M49 (strain NZ131) OX=471876 GN=Spy49_0244 PE=3 SV=1	2.43001	3.83857	2.44495	2.05409	3.30729	2.37212	3.08655	3.64941	1.84026	3.40092	4.49717	2.34603	2.02318	3.42532	2.14466	3.27111	2.73552	2.28981	2.7603	3.20947	2.80629	1.79576	2.68682	1.98686	1.94145	1.64683	2.37839	2.94762	2.73093	3.57619	2.90451	2.57784	2.85874	3.41471	2.53105	2.76548	2.92535	2.15648	1.98889	3.08491
A0A0H3BX80	8	6	78.0435	3.6004e-10	4.87703	41045.4	Cysteine desulfurase OS=Streptococcus pyogenes serotype M49 (strain NZ131) OX=471876 GN=Spy49_0874c PE=3 SV=1	0.209047	0.226091	0.273512	0.205832	0.205603	0.286168	0.281058	0.268186	0.396722	0.225456	0.218712	0.367051	0.331282	0.295513	0.382868	0.865126	0.754709	1.15215	0.731447	0.754721	0.886518	0.219335	0.192585	0.274383	0.185666	0.155781	0.233118	0.206272	0.151293	0.210811	0.236217	0.232535	0.315322	0.270406	0.336554	0.923994	0.790895	0.228768	0.191522	0.189458
A0A0H3C1H6	25	20	370.349	0.0252927	1.60623	33231.4	Cysteine synthase OS=Streptococcus pyogenes serotype M49 (strain NZ131) OX=471876 GN=cysM PE=3 SV=1	48.8227	43.6174	56.4628	33.5459	29.7257	42.9814	36.696	34.0844	48.72	37.347	31.1503	45.8004	52.6751	41.3533	56.8435	32.369	26.6209	37.6454	39.506	32.2699	45.7891	54.8683	44.0388	56.3116	39.449	33.5041	43.5709	40.1403	33.1718	44.1916	49.6343	35.4177	39.8334	38.0993	50.2907	32.2117	39.1883	51.7396	38.8413	39.1679
A0A0H3C0G9	20	14	171.702	0.0590978	1.65142	50591.1	Cysteine--tRNA ligase OS=Streptococcus pyogenes serotype M49 (strain NZ131) OX=471876 GN=cysS PE=3 SV=1	2.05491	2.03617	2.73033	2.70504	2.52018	3.6585	2.14996	1.76427	2.67771	1.67631	1.53373	2.18728	2.28809	1.95483	2.84319	2.66002	2.11884	3.1489	2.63947	2.32718	3.6234	2.77745	2.1816	2.88167	3.0706	2.51908	3.32359	2.94685	2.40778	3.10849	2.2738	2.96124	2.19731	1.79911	2.36204	2.64259	2.86335	2.61357	2.97109	2.82104
A0A0H3BXH5	7	7	77.1624	1.16898e-05	1.53248	17272	Cys-tRNA(Pro)/Cys-tRNA(Cys) deacylase OS=Streptococcus pyogenes serotype M49 (strain NZ131) OX=471876 GN=Spy49_0506c PE=3 SV=1	1.19249	1.27274	1.09709	1.1898	1.30758	1.0906	1.1599	1.28764	1.07247	1.08053	1.1222	0.975275	0.999789	1.10057	0.951041	1.0104	1.06158	0.933265	0.897296	0.9138	0.839333	1.1985	1.25873	1.06101	1.32874	1.42634	1.30664	1.31555	1.40531	1.27254	1.18744	1.19599	1.17334	1.05934	1.01713	1.00175	0.883476	1.17275	1.35391	1.33113
A0A0H3BYU2	8	7	60.8604	9.0539e-11	1.30203	22054.5	CYTH domain-containing protein OS=Streptococcus pyogenes serotype M49 (strain NZ131) OX=471876 GN=Spy49_0876c PE=4 SV=1	0.788091	0.763167	0.752953	0.73762	0.711593	0.726194	0.706624	0.695158	0.745687	0.758932	0.735747	0.754087	0.783615	0.785489	0.779489	0.911143	0.927498	0.957419	0.831622	0.873556	0.892666	0.740962	0.77525	0.756495	0.728352	0.748957	0.720354	0.7722	0.787666	0.783305	0.76807	0.725136	0.715823	0.749589	0.782864	0.93202	0.865948	0.757569	0.732554	0.781057
A0A0H3BZ15	3	3	20.1454	9.61192e-11	6.3116	14084.9	Cytidine deaminase OS=Streptococcus pyogenes serotype M49 (strain NZ131) OX=471876 GN=cdd PE=3 SV=1	0.174611	0.181683	0.215789	0.0908937	0.0860438	0.122715	0.278373	0.251891	0.297861	0.593646	0.562624	0.735019	0.428839	0.317636	0.407163	0.447739	0.404893	0.501484	0.183327	0.18208	0.245631	0.260813	0.251641	0.273468	0.150141	0.134259	0.178422	0.401357	0.295728	0.320861	0.190694	0.0998842	0.276042	0.63043	0.384546	0.451372	0.203679	0.261974	0.154274	0.339315
B5XKT7	13	8	129.11	0.0308618	1.30547	24960.5	Cytidylate kinase OS=Streptococcus pyogenes serotype M49 (strain NZ131) OX=471876 GN=cmk PE=3 SV=1	1.96733	2.15301	2.18897	2.11781	2.28219	2.65148	2.13398	2.22505	2.57666	2.34379	2.32093	2.79256	2.32361	2.27596	2.59183	2.59414	2.66656	2.97592	2.25229	2.5199	2.50256	2.21662	2.1514	2.36488	2.33874	2.15262	2.37828	2.568	2.39998	2.79639	2.10311	2.35049	2.3119	2.48576	2.39713	2.74554	2.42491	2.2443	2.28988	2.58812
A0A0H3C055	7	5	53.0302	1.63203e-14	1.57129	33775	DAGKc domain-containing protein OS=Streptococcus pyogenes serotype M49 (strain NZ131) OX=471876 GN=Spy49_0909c PE=3 SV=1	0.751517	0.771099	0.750652	1.1424	1.12206	1.13219	1.03773	0.957225	1.0474	1.03058	1.04909	1.04091	0.707878	0.728608	0.765159	0.745671	0.731882	0.702571	0.753663	0.722253	0.68577	0.818431	0.815808	0.810364	0.985937	0.954776	1.00582	0.966974	0.999957	1.04853	0.757756	1.13221	1.01412	1.04019	0.733882	0.726708	0.720562	0.814868	0.982178	1.00516
A0A0H3BZS7	26	26	394.007	8.97946e-06	1.34819	59215	DAK2 domain protein OS=Streptococcus pyogenes serotype M49 (strain NZ131) OX=471876 GN=Spy49_1556c PE=4 SV=1	26.7578	25.0367	28.4354	25.1722	27.8062	25.8508	28.1525	26.2122	27.9712	26.6894	24.575	25.5118	26.3434	24.7918	26.1483	31.6876	28.3645	31.1609	32.2409	32.6766	37.0238	25.6711	24.8926	26.2811	24.4297	24.6049	26.5787	26.5898	25.5635	28.0379	26.7433	26.2764	27.4453	25.5921	25.7612	30.4043	33.9804	25.6149	25.2044	26.7304
B5XM63	17	14	142.535	0.00364978	1.51031	39140.1	D-alanine--D-alanine ligase OS=Streptococcus pyogenes serotype M49 (strain NZ131) OX=471876 GN=ddl PE=3 SV=1	2.51874	2.4643	2.47763	2.35748	2.18602	2.50757	2.84372	2.70745	2.55736	2.92731	2.20039	3.6745	3.27446	2.78486	2.86891	3.06687	3.17898	3.05611	2.97063	3.90824	3.65339	2.39485	2.15512	2.42363	3.15709	2.85533	2.63741	2.87836	2.86524	3.15402	2.48689	2.35036	2.70284	2.93407	2.97608	3.10065	3.51075	2.32453	2.88328	2.96587
B5XLX5	23	19	290.882	3.57521e-07	1.76019	57041.4	D-alanine--D-alanyl carrier protein ligase OS=Streptococcus pyogenes serotype M49 (strain NZ131) OX=471876 GN=dltA PE=3 SV=1	4.91846	5.65596	5.02586	6.71296	8.05137	5.96265	6.16123	6.69819	5.36778	6.68493	6.81445	5.97964	5.27939	5.61162	4.70074	4.31867	4.41458	4.06736	4.61976	5.08212	4.6939	6.08391	6.24248	5.71807	7.02121	7.7357	7.06708	7.28135	8.08071	7.16946	5.20009	6.90899	6.07574	6.49301	5.19725	4.26687	4.79859	6.01482	7.27466	7.51051
B5XLX3	4	4	59.1854	0.00204289	1.38368	9010.16	D-alanyl carrier protein OS=Streptococcus pyogenes serotype M49 (strain NZ131) OX=471876 GN=dltC PE=3 SV=1	4.99441	5.68521	5.71279	5.65651	6.19714	6.15162	4.53951	4.29252	5.19113	5.21932	5.39546	5.77624	4.95237	5.06976	5.42821	5.22264	5.06464	5.60655	5.85201	6.15889	7.3927	5.83059	5.24394	6.26102	5.57957	5.94587	5.82545	5.54878	5.84649	5.59932	5.46413	6.00176	4.67439	5.46368	5.15011	5.29794	6.46787	5.77852	5.78363	5.66486
A0A0H3C1S4	5	4	46.5345	1.16814e-07	1.82415	27884.7	D-alanyl-D-alanine carboxypeptidase OS=Streptococcus pyogenes serotype M49 (strain NZ131) OX=471876 GN=Spy49_1378c PE=4 SV=1	0.626766	0.491542	0.650145	0.456041	0.413555	0.481296	0.759412	0.649031	0.789585	0.831335	0.80386	0.829034	0.766756	0.646772	0.701698	0.829949	0.764616	0.78539	0.449235	0.398842	0.520216	0.612053	0.626393	0.660664	0.567271	0.468329	0.589243	0.705893	0.64966	0.667712	0.589485	0.450298	0.732676	0.82141	0.705075	0.793318	0.456098	0.633037	0.541614	0.674422
B5XIM6	5	4	33.368	0.000354018	1.70561	15969.3	D-aminoacyl-tRNA deacylase OS=Streptococcus pyogenes serotype M49 (strain NZ131) OX=471876 GN=dtd PE=3 SV=1	0.311303	0.285561	0.37709	0.351895	0.358295	0.418081	0.345041	0.328486	0.373789	0.387243	0.425857	0.460354	0.42556	0.323209	0.419306	0.308435	0.25425	0.392383	0.293502	0.279814	0.36892	0.385908	0.312411	0.396009	0.462702	0.390002	0.497817	0.565661	0.486479	0.554947	0.324651	0.376091	0.349105	0.424484	0.389358	0.318356	0.314079	0.364776	0.450174	0.535696
A0A0H3C1J8	30	29	352.44	0	2.46179	80207.9	DD-transpeptidase OS=Streptococcus pyogenes serotype M49 (strain NZ131) OX=471876 GN=pbp1A PE=4 SV=1	6.1385	6.77936	6.50816	5.69914	6.34191	5.77341	7.63397	7.76459	7.12685	5.4238	5.5824	5.32296	7.3057	7.25887	7.47831	8.3379	8.38542	8.63359	3.37751	3.3643	3.55839	6.17964	6.32135	6.02636	5.41408	5.60133	5.55001	3.74993	3.86247	3.8201	6.47534	5.93815	7.50847	5.44305	7.34763	8.4523	3.4334	6.17578	5.52181	3.81083
A0A0H3BVE8	21	15	203.639	5.66214e-15	5.4575	84029.6	DD-transpeptidase OS=Streptococcus pyogenes serotype M49 (strain NZ131) OX=471876 GN=pbp1b PE=4 SV=1	1.26184	1.40929	1.27036	1.26662	1.54724	1.28289	1.66879	1.81095	1.56984	1.01175	1.15595	0.95488	1.40049	1.46643	1.34037	1.60949	1.7669	1.6722	0.29124	0.295639	0.338375	1.21868	1.25986	1.15144	1.044	1.14818	1.03317	0.606711	0.649695	0.597109	1.31383	1.36558	1.68319	1.04086	1.40243	1.68286	0.308418	1.20999	1.07512	0.617839
A0A0H3C1W1	15	13	122.701	2.54635e-05	1.35169	85648.3	DD-transpeptidase OS=Streptococcus pyogenes serotype M49 (strain NZ131) OX=471876 GN=pbp2A PE=4 SV=1	1.26689	1.48384	1.30876	1.2545	1.35722	1.35553	1.31077	1.38014	1.32043	1.33728	1.55149	1.36769	1.3117	1.49508	1.37343	1.45894	1.64932	1.59508	1.7204	1.79165	1.85045	1.32178	1.4465	1.32375	1.45522	1.40185	1.37216	1.35241	1.39378	1.33038	1.35317	1.32242	1.33711	1.41882	1.3934	1.56778	1.7875	1.36401	1.40974	1.35886
A0A0H3C090	11	9	106.556	7.3498e-09	1.35925	34245.7	Deacetylase sirtuin-type domain-containing protein OS=Streptococcus pyogenes serotype M49 (strain NZ131) OX=471876 GN=Spy49_0961c PE=4 SV=1	2.13542	2.10113	2.03921	2.62545	2.72636	2.71126	2.54612	2.55154	2.59142	2.87293	2.88591	2.77146	2.68291	2.70993	2.63028	2.54698	2.37173	2.38193	2.91189	2.71103	2.68635	2.44041	2.26727	2.4169	2.35232	2.44274	2.27658	2.13917	2.40768	2.29472	2.09192	2.68769	2.56303	2.84344	2.67437	2.43355	2.76976	2.37486	2.35721	2.28052
A0A0H3C0P0	31	25	366.682	2.34657e-12	2.44379	60711.3	DEAD-box ATP-dependent RNA helicase CshA OS=Streptococcus pyogenes serotype M49 (strain NZ131) OX=471876 GN=deaD1 PE=3 SV=1	5.34834	6.21609	5.44045	7.09439	8.13969	6.19382	5.02024	5.25205	4.61593	4.19417	4.28533	3.80633	6.24859	6.47867	5.79591	9.11149	9.61148	8.52576	9.43898	10.2156	8.84655	5.07542	5.25373	4.7065	4.49225	4.74362	4.42711	3.8741	3.89499	3.89358	5.66829	7.14263	4.96274	4.09528	6.17439	9.08291	9.50037	5.01188	4.55433	3.88756
A0A0H3C0Y5	25	21	249.17	0.000269093	1.40942	50784	DEAD-box ATP-dependent RNA helicase CshB OS=Streptococcus pyogenes serotype M49 (strain NZ131) OX=471876 GN=cshB PE=3 SV=1	3.22341	3.36576	3.04456	3.3941	3.84807	2.87709	3.49705	3.9463	2.90627	3.67043	3.72921	3.23777	3.14855	3.33807	3.01509	3.69459	3.8584	3.44452	2.72627	2.97	2.59886	2.78593	2.93537	2.55635	2.60913	2.86599	2.52637	2.56892	2.68778	2.54616	3.21124	3.37309	3.44987	3.54581	3.16724	3.66584	2.76504	2.75922	2.66716	2.60095
A0A0H3C036	13	11	121.985	4.96438e-11	2.37303	31277.9	DegV family protein OS=Streptococcus pyogenes serotype M49 (strain NZ131) OX=471876 GN=Spy49_0681 PE=4 SV=1	2.85038	2.89792	3.12763	2.87111	2.90555	3.18023	2.44803	2.44414	2.7991	1.7283	1.61147	1.94835	2.95968	2.96882	3.08867	4.29036	3.79007	4.4684	2.10269	2.18699	2.26869	2.83298	2.78159	3.01859	2.61478	2.65367	2.88224	2.6656	2.54889	2.76269	2.95864	2.98563	2.56376	1.7627	3.00572	4.18294	2.18612	2.87772	2.71689	2.65906
A0A0H3BZ04	18	16	177.579	0.209779	1.14372	30503.4	DegV family protein OS=Streptococcus pyogenes serotype M49 (strain NZ131) OX=471876 GN=Spy49_1150c PE=4 SV=1	3.25619	3.46141	3.17763	2.96611	3.53235	3.12906	3.09726	3.42787	3.07616	3.41627	3.56662	3.2567	3.26668	3.41427	3.20246	3.27651	3.50374	3.26297	2.75615	3.27359	2.92314	3.2069	3.03291	3.14072	3.24096	3.41419	3.12741	3.03942	3.20599	3.21526	3.29841	3.20917	3.20043	3.4132	3.29447	3.34774	2.9843	3.12684	3.26085	3.15355
A0A0H3BYE6	2	2	13.106	0.00227579	1.86761	24716.3	Deoxyadenosine kinase/Deoxyguanosine kinase OS=Streptococcus pyogenes serotype M49 (strain NZ131) OX=471876 GN=Spy49_0108c PE=3 SV=1	0.353025	0.340468	0.433136	0.398974	0.329055	0.472581	0.354345	0.295537	0.407511	0.462325	0.388887	0.557015	0.504922	0.38973	0.604822	0.679392	0.572773	0.722629	0.429871	0.434244	0.637019	0.419388	0.351637	0.444227	0.39094	0.34434	0.390054	0.462751	0.411997	0.453345	0.375543	0.400203	0.352464	0.469409	0.499825	0.658265	0.500378	0.405084	0.375111	0.442698
B5XID8	14	13	157.274	0.000314052	1.45206	24349.6	Deoxyribose-phosphate aldolase OS=Streptococcus pyogenes serotype M49 (strain NZ131) OX=471876 GN=deoC PE=3 SV=1	3.42441	3.55525	3.73162	3.18238	3.55482	3.94891	3.50676	3.80329	3.78816	4.00647	4.47364	4.14805	3.72961	3.93975	4.12287	3.84554	3.82033	4.4903	5.1199	4.31028	5.79252	3.6079	3.43428	3.77733	3.42695	3.3719	3.86396	3.32528	3.70025	3.45802	3.57043	3.56203	3.69941	4.20939	3.93074	4.05205	5.07424	3.6065	3.55427	3.49451
A0A0H3BX32	8	7	100.234	0.00182243	1.3045	31267.7	Diadenylate cyclase OS=Streptococcus pyogenes serotype M49 (strain NZ131) OX=471876 GN=dacA PE=3 SV=1	1.89461	2.15934	2.20266	2.34377	2.23382	2.56173	2.5241	2.36164	2.90646	2.49092	2.39746	2.89853	2.17404	2.12073	2.34583	1.95269	1.83074	2.18993	2.46984	2.42632	2.64677	2.05604	1.98908	2.18135	2.30827	2.11404	2.32019	2.2652	2.02571	2.36246	2.08554	2.37977	2.5974	2.59563	2.21353	1.99112	2.51431	2.07549	2.2475	2.21779
A0A0H3C051	6	6	43.3265	0.000214748	1.40799	19429.4	Dihydrofolate reductase OS=Streptococcus pyogenes serotype M49 (strain NZ131) OX=471876 GN=dyr PE=3 SV=1	1.69811	2.00968	1.67821	1.95006	2.26251	1.99202	1.93933	2.01543	2.00794	1.80718	2.03062	1.94325	2.03725	2.16679	1.91725	2.32995	2.49656	2.44428	1.79525	2.15632	1.80488	1.67563	1.79905	1.68926	1.80071	1.87456	1.84418	1.99406	2.14271	1.94512	1.79533	2.0682	1.98757	1.92702	2.04043	2.4236	1.91881	1.72131	1.83982	2.0273
A0A0H3BY72	3	3	24.2977	2.72127e-11	2.53737	47714.9	Dihydrofolate synthase / Folylpolyglutamate synthase OS=Streptococcus pyogenes serotype M49 (strain NZ131) OX=471876 GN=folC1 PE=3 SV=1	0.124522	0.141281	0.133069	0.146738	0.166759	0.164645	0.205315	0.245758	0.202555	0.304711	0.333916	0.309135	0.187179	0.211929	0.199871	0.15892	0.179561	0.170244	0.117245	0.146541	0.109736	0.135913	0.155301	0.149974	0.151125	0.174265	0.17061	0.197084	0.216532	0.222614	0.132957	0.159381	0.217876	0.315921	0.19966	0.169575	0.124507	0.147063	0.165333	0.212077
A0A0H3C0D5	40	32	471.658	3.34735e-08	1.50135	49881.1	Dihydrolipoamide acetyltransferase component of pyruvate dehydrogenase complex OS=Streptococcus pyogenes serotype M49 (strain NZ131) OX=471876 GN=acoC PE=3 SV=1	12.688	13.7262	12.1169	14.0282	15.0658	13.3826	15.1095	15.6767	15.5561	14.5255	13.972	13.7874	16.8581	17.8861	15.9827	16.7888	18.4191	16.2767	13.5253	14.8473	12.6724	12.0122	12.8239	12.0568	11.2042	11.5195	11.5685	13.1994	13.7793	14.0633	12.8437	14.1589	15.4474	14.095	16.909	17.1615	13.6817	12.2976	11.4307	13.6807
A0A0H3BX27	51	38	677.918	1.6217e-12	1.90298	62572.7	Dihydrolipoyl dehydrogenase OS=Streptococcus pyogenes serotype M49 (strain NZ131) OX=471876 GN=acoL PE=3 SV=1	11.2436	13.2833	12.6949	14.6322	15.1018	15.1653	16.0049	16.4736	16.218	13.0542	13.5562	13.1509	15.8386	16.7949	15.8984	17.8944	17.4935	18.0038	21.0576	21.8963	25.4274	12.925	13.1102	13.6297	11.7879	11.9329	12.2131	12.2377	12.1721	12.1389	12.4072	14.9664	16.2321	13.2538	16.1773	17.7972	22.7938	13.2216	11.9779	12.1829
A0A0H3BZQ1	6	5	54.9298	1.90716e-07	1.84672	45374.6	Dihydroorotase OS=Streptococcus pyogenes serotype M49 (strain NZ131) OX=471876 GN=pyrC PE=3 SV=1	0.816325	0.740929	0.87159	1.08542	1.02962	1.23153	0.951236	0.920134	1.17105	0.772585	0.735818	0.953187	0.831921	0.753474	0.928974	1.2448	1.16022	1.25281	1.50605	1.45964	1.5197	0.922123	0.928712	0.977911	1.03596	0.984815	1.14056	0.962104	0.942775	1.0671	0.809615	1.11553	1.01414	0.82053	0.838123	1.21928	1.49513	0.942915	1.05378	0.99066
A0A0H3BXX6	10	9	94.1664	0.00456065	1.30666	32694.3	Dihydroorotate oxidase (fumarate) OS=Streptococcus pyogenes serotype M49 (strain NZ131) OX=471876 GN=pyrD PE=3 SV=1	2.57318	2.45588	2.80156	2.79105	2.66747	2.89403	2.89934	2.67107	2.96598	3.12602	2.85535	3.36259	2.82	2.4749	2.77796	3.0265	2.5825	3.15227	3.3699	3.09293	3.76913	2.72128	2.57271	2.94481	3.22233	2.79021	3.39697	3.45708	3.05711	3.49228	2.61021	2.78418	2.84547	3.11465	2.69095	2.92043	3.41065	2.74627	3.1365	3.33549
A0A0H3BYS4	13	11	165.763	0.0755674	1.35403	28951.9	Dihydropteroate synthase OS=Streptococcus pyogenes serotype M49 (strain NZ131) OX=471876 GN=folP PE=3 SV=1	13.0942	11.9927	15.4422	15.776	13.3797	15.5178	14.5074	12.4092	15.476	14.6356	13.0514	15.0037	15.1626	12.6602	15.6417	18.5713	15.2251	20.1852	17.9643	15.4054	21.508	15.3617	12.8617	15.742	15.7374	13.1215	15.9661	15.7689	13.7926	16.3413	13.5097	14.8912	14.1309	14.2302	14.4882	17.9939	18.2926	14.6552	14.9417	15.301
A0A0H3BZE5	24	19	262.854	0.345746	1.49479	53064.2	Dipeptidase OS=Streptococcus pyogenes serotype M49 (strain NZ131) OX=471876 GN=pepD PE=3 SV=1	5.09749	4.10933	5.23233	5.61641	4.44798	6.74089	5.54186	4.38409	7.05277	6.22417	4.95607	8.10013	5.55857	4.11707	5.90938	5.33179	4.61462	6.42974	5.96491	5.21685	6.59686	6.27018	5.20614	6.74474	6.72438	5.26348	7.01032	7.53785	5.87968	8.16601	4.81305	5.60176	5.65957	6.42679	5.19501	5.45872	5.92621	6.07369	6.33273	7.19451
A0A0H3C1W5	9	7	71.4748	0	5.26642	55599.3	Dipeptidase OS=Streptococcus pyogenes serotype M49 (strain NZ131) OX=471876 GN=Spy49_1713 PE=3 SV=1	1.42354	1.46896	1.46241	0.541528	0.571063	0.595519	1.7543	1.76888	1.80133	1.85612	1.72278	1.72785	1.20076	1.18862	1.20034	0.95945	0.993587	1.04736	0.862347	0.820313	0.710693	1.25655	1.21438	1.2719	0.601028	0.567948	0.626223	0.322218	0.316718	0.372095	1.45164	0.56937	1.77484	1.76892	1.19657	1.00013	0.797784	1.24761	0.5984	0.33701
A0A0H3C022	7	7	47.7136	1.8141e-13	2.19272	29453.1	Dipeptide transport ATP-binding protein dppD OS=Streptococcus pyogenes serotype M49 (strain NZ131) OX=471876 GN=dppD PE=4 SV=1	0.420103	0.454303	0.409216	0.351106	0.394599	0.351726	0.310466	0.344189	0.29339	0.377583	0.377492	0.361043	0.500363	0.537692	0.517412	0.67595	0.695404	0.707439	0.321761	0.399066	0.341629	0.407331	0.43197	0.424998	0.406303	0.415269	0.401365	0.5096	0.540209	0.526038	0.427874	0.365811	0.316015	0.372039	0.518489	0.692931	0.354152	0.421433	0.407646	0.525282
A0A0H3C0L9	7	7	56.8528	1.3502e-06	2.33428	24027.7	Dipeptide transport ATP-binding protein dppF OS=Streptococcus pyogenes serotype M49 (strain NZ131) OX=471876 GN=dppF PE=4 SV=1	0.651713	0.687397	0.799841	0.645391	0.544007	0.765597	0.553949	0.537546	0.629528	0.540408	0.463771	0.632275	0.782587	0.66476	0.743829	1.33121	1.09768	1.39104	1.01676	0.916823	1.26496	0.763855	0.639681	0.79623	0.726188	0.593435	0.799643	0.717947	0.575726	0.744615	0.712984	0.651665	0.573674	0.545485	0.730392	1.27331	1.06618	0.733255	0.706422	0.679429
A0A0H3BZ24	2	2	12.8644	0.169214	1.64273	30338.4	Dipeptide transport system permease protein dppC OS=Streptococcus pyogenes serotype M49 (strain NZ131) OX=471876 GN=dppC PE=3 SV=1	2.82822	2.50866	3.08266	3.11578	3.38677	2.80005	2.75989	3.48026	4.03686	2.90645	2.33506	1.70501	2.37861	3.96077	2.13829	2.87564	2.66164	2.83717	2.39871	2.7771	3.10904	2.62587	2.97035	3.59818	2.91564	3.32788	3.51114	3.70174	4.78108	2.92846	2.80651	3.10087	3.42567	2.31551	2.82589	2.79148	2.76162	3.0648	3.25155	3.80376
A0A0H3C1R4	36	30	406.788	6.47676e-06	1.87522	55667.9	Dipeptide-binding ABC transporter_ periplasmic substrate-binding component OS=Streptococcus pyogenes serotype M49 (strain NZ131) OX=471876 GN=dppA PE=4 SV=1	5.6018	4.97982	6.40549	5.33808	4.65244	5.65398	4.99467	3.80818	5.34137	5.05668	4.60345	5.62652	6.46484	5.42027	6.59671	9.2841	7.73357	9.50584	8.76593	7.73415	9.82527	6.43419	5.26571	6.22923	5.72231	4.90615	5.96163	5.37909	4.78559	5.48978	5.66237	5.21483	4.71474	5.09555	6.1606	8.84117	8.77512	5.97638	5.53003	5.21815
A0A0H3BZN3	2	2	20.342	2.84475e-07	2.9446	34999.8	Diphosphomevalonate decarboxylase OS=Streptococcus pyogenes serotype M49 (strain NZ131) OX=471876 GN=mvaD PE=3 SV=1	0.147995	0.141447	0.19633	0.139312	0.106802	0.185227	0.143035	0.119224	0.152902	0.143649	0.141711	0.190142	0.184935	0.147263	0.219825	0.318003	0.259383	0.373208	0.352255	0.315738	0.447815	0.167844	0.141	0.158	0.144197	0.110333	0.144253	0.121349	0.108791	0.148794	0.161924	0.14378	0.138387	0.158501	0.184007	0.316865	0.371936	0.155615	0.132927	0.126311
A0A0H3BZ72	15	11	127.003	3.96459e-05	1.34337	36339.2	dITP/XTP pyrophosphatase OS=Streptococcus pyogenes serotype M49 (strain NZ131) OX=471876 GN=Spy49_0298 PE=3 SV=1	1.81745	2.0084	2.08503	1.72609	1.82995	2.03359	2.06302	1.97104	2.24495	2.31741	2.29426	2.41412	1.83644	1.95113	1.99255	1.86987	1.83831	2.03941	2.03139	2.08582	2.10165	1.80649	1.73966	1.89116	1.75964	1.67821	1.79211	1.90443	1.92923	1.87591	1.97029	1.86321	2.09301	2.34193	1.92671	1.91586	2.07296	1.81244	1.74332	1.90319
A0A0H3C0L8	38	31	348.507	3.92758e-08	1.5496	92890.1	DNA gyrase subunit A OS=Streptococcus pyogenes serotype M49 (strain NZ131) OX=471876 GN=gyrA PE=3 SV=1	4.38012	4.74424	4.85279	4.09439	4.26267	4.31104	4.04961	3.68722	4.18414	3.2449	3.46211	3.72466	4.17	4.18259	4.34272	5.45532	5.00938	5.7002	5.31017	4.96621	5.75774	4.76108	4.34094	4.68569	4.17548	4.22661	4.26602	4.08621	4.27221	4.2288	4.65905	4.2227	3.97365	3.47722	4.23177	5.3883	5.34471	4.5959	4.22271	4.19574
A0A0H3BY57	37	34	344.168	6.49525e-06	1.59028	72352	DNA gyrase subunit B OS=Streptococcus pyogenes serotype M49 (strain NZ131) OX=471876 GN=gyrB PE=3 SV=1	2.55918	3.02004	2.56022	2.51925	2.9535	2.25275	2.80606	2.83324	2.46523	3.28367	3.10007	2.84703	2.86294	2.86538	2.42949	3.61812	3.56631	3.44383	2.5924	2.9339	2.64727	2.37063	2.30943	2.42262	2.1798	2.21991	2.28355	2.34858	2.23461	2.20119	2.71314	2.57516	2.70151	3.07692	2.71927	3.54275	2.72452	2.36756	2.22775	2.26146
B5XKP3	28	24	289.909	2.29197e-08	1.75614	72606.6	DNA ligase OS=Streptococcus pyogenes serotype M49 (strain NZ131) OX=471876 GN=ligA PE=3 SV=1	1.95901	1.99399	1.70277	1.69947	2.01048	1.71808	1.70883	1.88655	1.62909	1.70639	1.79036	1.66754	1.69721	1.82128	1.59425	2.68015	2.90461	2.47974	2.73996	3.36267	2.64213	1.67591	1.7764	1.61472	1.54714	1.76353	1.66886	1.60182	1.77649	1.6374	1.88526	1.80934	1.74149	1.72143	1.70425	2.68817	2.91492	1.68901	1.65984	1.6719
B5XJ09	12	11	107.219	6.85132e-11	8.00263	74584.2	DNA mismatch repair protein MutL OS=Streptococcus pyogenes serotype M49 (strain NZ131) OX=471876 GN=mutL PE=3 SV=1	1.09826	1.21616	1.01745	1.47755	1.71948	1.25802	1.49194	1.84584	1.27514	1.72381	1.77998	1.36486	1.32693	1.36267	1.1663	0.854355	0.933189	0.789656	0.252224	0.266369	0.254859	1.1786	1.38523	1.10773	1.44206	1.62088	1.41308	2.0443	2.19733	1.94802	1.11063	1.48501	1.53764	1.62288	1.2853	0.859067	0.257817	1.22385	1.49201	2.06321
B5XJ75	18	16	165.45	0.000298124	1.60289	95758.3	DNA mismatch repair protein MutS OS=Streptococcus pyogenes serotype M49 (strain NZ131) OX=471876 GN=mutS PE=3 SV=1	3.56709	3.81922	3.04872	3.47258	3.98411	3.07515	3.25883	3.41518	2.9219	2.61804	2.7135	2.31929	3.14567	3.52352	2.86206	3.57258	3.96118	3.30615	4.02581	4.51266	3.72495	3.05688	3.50387	2.94833	3.08189	3.369	2.93794	2.63914	2.87838	2.56699	3.47834	3.51061	3.19864	2.55028	3.17708	3.6133	4.08781	3.16969	3.12961	2.69483
A0A0H3BVL0	22	22	198.97	5.90448e-09	1.37546	99077.2	DNA polymerase I OS=Streptococcus pyogenes serotype M49 (strain NZ131) OX=471876 GN=polA PE=3 SV=1	2.84966	2.83302	2.82852	3.35625	3.60247	3.53342	3.13272	3.51808	3.31503	3.04542	3.07445	3.02629	2.9828	3.21892	3.1222	3.66745	3.78037	3.65076	3.68596	3.9186	4.10226	2.83013	2.92759	2.98569	3.0091	3.04145	3.1438	3.2214	3.52634	3.30713	2.83707	3.49738	3.32194	3.04872	3.10797	3.69953	3.90227	2.91447	3.06478	3.35162
A0A0H3BXJ6	3	3	25.2883	0.00104145	1.68849	33780.8	DNA polymerase III delta prime subunit OS=Streptococcus pyogenes serotype M49 (strain NZ131) OX=471876 GN=Spy49_0327 PE=4 SV=1	0.461096	0.571017	0.432856	0.421006	0.46526	0.364638	0.464624	0.511772	0.377273	0.43417	0.470828	0.341357	0.466541	0.476489	0.41877	0.525192	0.585755	0.474642	0.306748	0.340813	0.291495	0.397893	0.434835	0.379916	0.343419	0.394534	0.330376	0.353163	0.395534	0.333038	0.488323	0.416968	0.451223	0.415452	0.453933	0.528529	0.313018	0.404214	0.35611	0.360578
A0A0H3BZG0	3	2	18.899	0.000232473	1.60549	39553.1	DNA polymerase III delta subunit OS=Streptococcus pyogenes serotype M49 (strain NZ131) OX=471876 GN=holA PE=4 SV=1	0.26523	0.239216	0.222937	0.232447	0.239908	0.208957	0.250833	0.309844	0.23144	0.283609	0.291212	0.26261	0.25095	0.277097	0.235267	0.26593	0.306877	0.228464	0.178808	0.187466	0.155329	0.208258	0.237454	0.210715	0.202109	0.213246	0.193174	0.266393	0.29938	0.268259	0.242461	0.227104	0.264039	0.279143	0.254438	0.26709	0.173868	0.218809	0.202843	0.27801
A0A0H3C1M6	36	35	295.884	0.224791	1.31847	165265	DNA polymerase III PolC-type OS=Streptococcus pyogenes serotype M49 (strain NZ131) OX=471876 GN=polC PE=3 SV=1	2.72486	2.84477	2.719	3.03838	3.27279	2.4327	2.99529	2.72287	2.37278	2.58962	2.30099	2.32675	3.30726	2.62513	2.37249	3.49776	3.06874	2.94939	2.7615	3.05416	2.72173	2.86088	2.42616	2.78269	2.92585	2.81681	2.88205	2.98057	2.52225	2.86674	2.76288	2.91462	2.69698	2.40579	2.76829	3.17196	2.8458	2.68991	2.87491	2.78985
A0A0H3BYT1	11	10	92.1936	0.00515174	1.40629	62283.7	DNA polymerase III subunit gamma/tau OS=Streptococcus pyogenes serotype M49 (strain NZ131) OX=471876 GN=dnaX PE=3 SV=1	1.05208	1.13344	1.00858	0.98494	1.09748	0.821435	1.26504	1.36446	1.03724	1.40562	1.42922	1.13344	1.085	1.1726	0.996016	1.25182	1.31592	1.13219	1.12799	1.21103	1.04989	0.946166	1.07558	0.936247	0.920959	1.0246	0.876258	1.0845	1.18868	1.05029	1.0647	0.96795	1.22225	1.32276	1.08454	1.23331	1.12964	0.985998	0.940606	1.10783
A0A0H3BYJ8	2	2	12.7033	3.93946e-06	3.33747	40993.4	DNA polymerase IV OS=Streptococcus pyogenes serotype M49 (strain NZ131) OX=471876 GN=dinP PE=3 SV=1	0.396929	0.387642	0.331312	0.416343	0.468839	0.372551	0.38885	0.486381	0.322956	0.384623	0.429436	0.325871	0.364963	0.355106	0.398196	0.357744	0.4027	0.33781	0.133721	0.170569	0.107372	0.354141	0.398243	0.292158	0.329166	0.396183	0.343486	0.451994	0.471545	0.45037	0.371961	0.419244	0.399396	0.379977	0.372755	0.366085	0.137221	0.348181	0.356278	0.457969
A0A0H3BY82	2	2	18.0178	0.000705209	2.1461	69276.8	DNA primase OS=Streptococcus pyogenes serotype M49 (strain NZ131) OX=471876 GN=dnaG PE=3 SV=1	0.464493	0.459372	0.581533	0.447013	0.454742	0.543855	0.567183	0.467968	0.636709	0.437486	0.38833	0.508334	0.399828	0.400471	0.516896	0.484654	0.406728	0.560462	0.244572	0.241738	0.29271	0.529715	0.449458	0.586118	0.52959	0.479732	0.561674	0.548704	0.445606	0.559248	0.501799	0.48187	0.557286	0.444717	0.439065	0.483948	0.259674	0.521764	0.523665	0.517853
A0A0H3BXA7	19	14	180.898	7.93777e-06	1.868	50958.3	DNA repair protein RadA OS=Streptococcus pyogenes serotype M49 (strain NZ131) OX=471876 GN=radA PE=3 SV=1	2.41182	2.87256	2.2589	3.35639	3.97512	2.95722	2.77147	3.30864	2.56703	2.68207	3.04191	2.40863	2.33717	2.58725	2.248	1.75754	2.09231	1.65804	1.98082	2.23883	1.63488	2.51725	2.98102	2.41589	3.15809	3.59755	3.09336	3.3265	3.6238	3.26094	2.51443	3.42958	2.88238	2.71087	2.39081	1.83596	1.95151	2.63805	3.283	3.40375
A0A0H3C0Q2	20	14	184.224	0.000161094	1.75672	62226.4	DNA repair protein RecN OS=Streptococcus pyogenes serotype M49 (strain NZ131) OX=471876 GN=recN PE=3 SV=1	0.920091	1.03531	1.1942	0.90269	0.937301	1.15727	0.970726	0.95395	1.21158	0.965792	0.883364	1.28981	1.0421	0.968597	1.13054	1.45546	1.34488	1.69227	1.58085	1.59891	1.95592	1.07502	0.84128	1.11728	1.00049	0.78812	1.13483	1.01953	0.919001	1.0142	1.04987	0.999088	1.04542	1.04632	1.04708	1.49753	1.71189	1.01119	0.97448	0.984243
A0A0H3BYH9	4	4	26.0336	2.77556e-14	1.94011	26346.9	DNA replication protein DnaD_ putative OS=Streptococcus pyogenes serotype M49 (strain NZ131) OX=471876 GN=dnaD PE=4 SV=1	0.665493	0.674566	0.674014	0.467088	0.484812	0.460025	0.578283	0.634868	0.591165	0.594537	0.649229	0.61094	0.688839	0.683598	0.677814	0.808738	0.80649	0.850719	0.483064	0.445496	0.501149	0.553956	0.510105	0.553941	0.397585	0.421521	0.451928	0.496449	0.50456	0.494709	0.671358	0.470641	0.601438	0.618235	0.683417	0.821982	0.47657	0.539334	0.423678	0.498573
A0A0H3C059	34	26	302.818	0.138537	1.4175	80896.4	DNA topoisomerase 1 OS=Streptococcus pyogenes serotype M49 (strain NZ131) OX=471876 GN=topA PE=3 SV=1	4.27654	5.21487	3.76192	3.53292	4.63783	3.1507	4.37463	5.11731	4.03018	5.29627	5.58412	4.85578	4.53743	5.1849	3.58599	3.44969	4.3127	3.33895	4.14098	5.24636	3.5955	4.55461	4.84487	4.05538	3.86264	4.2121	3.38014	3.90233	4.22417	3.76816	4.41777	3.77381	4.50737	5.24539	4.43611	3.70045	4.32761	4.48496	3.81829	3.96488
A0A0H3BWU9	23	17	225.284	1.68436e-09	1.3628	92452.2	DNA topoisomerase 4 subunit A OS=Streptococcus pyogenes serotype M49 (strain NZ131) OX=471876 GN=parC PE=3 SV=1	1.97094	1.94992	1.99979	1.90368	1.94942	2.00067	2.24512	2.19421	2.31383	2.06128	2.15271	2.18392	2.08332	2.05614	2.18826	2.50962	2.47316	2.5883	2.62026	2.54042	2.81683	2.05551	1.95707	2.01912	2.08094	1.8615	1.99875	2.19269	2.04153	2.14539	1.97355	1.95126	2.25105	2.13264	2.10924	2.52369	2.65917	2.01057	1.9804	2.12654
A0A0H3C069	21	19	168.797	1.19711e-06	1.43097	72101	DNA topoisomerase 4 subunit B OS=Streptococcus pyogenes serotype M49 (strain NZ131) OX=471876 GN=parE PE=3 SV=1	1.79884	1.96562	1.91352	1.84754	2.01438	1.86098	2.00815	2.05622	2.06741	2.06851	2.34459	1.91848	2.15737	2.35307	2.11229	2.21578	2.15505	2.10499	2.35181	2.18294	2.45151	2.0085	1.90376	1.99456	1.66556	1.73903	1.77473	1.55581	1.72967	1.59673	1.89266	1.90763	2.04393	2.11053	2.20758	2.15861	2.32875	1.96894	1.72644	1.6274
A0A0H3BXQ2	15	15	127.587	4.1115e-07	1.66478	89386.3	DNA translocase FtsK OS=Streptococcus pyogenes serotype M49 (strain NZ131) OX=471876 GN=ftsK PE=3 SV=1	1.13016	1.16938	1.03592	0.848161	0.978884	0.83488	1.08339	1.15582	1.00858	0.980333	0.966493	0.884408	0.975979	1.09903	0.926944	1.30613	1.43196	1.24363	1.18902	1.24314	1.05567	0.908851	0.973379	0.88242	0.827649	0.887466	0.832646	0.757391	0.868927	0.76542	1.11182	0.887308	1.0826	0.943745	1.00065	1.32724	1.16261	0.92155	0.849254	0.797246
A0A0H3C0P8	6	6	77.8786	1.7513e-05	1.25436	9647.08	DNA-binding protein HU OS=Streptococcus pyogenes serotype M49 (strain NZ131) OX=471876 GN=Spy49_1147c PE=3 SV=1	94.9626	103.903	101.28	112.71	120.146	123.002	102.207	106.852	108.35	99.8818	100.594	104.873	102.978	98.6154	105.784	105.919	100.245	110.055	101.016	98.0651	112.507	109.176	100.663	114.346	119.289	117.222	125.311	123.276	124.592	128.625	100.049	118.619	105.803	101.783	102.459	105.406	103.863	108.062	120.607	125.498
A0A0H3BWS9	2	2	21.5514	1.32662e-06	1.54065	25169	DNA-binding response regulator OS=Streptococcus pyogenes serotype M49 (strain NZ131) OX=471876 GN=Spy49_0688 PE=4 SV=1	1.27566	1.17174	1.23656	1.36634	1.20622	1.29398	1.13203	1.16273	1.34084	1.64672	1.37457	1.52305	1.37827	1.28647	1.40445	1.47206	1.34648	1.51889	1.00955	0.972362	0.967722	1.21599	1.31747	1.31188	1.20031	1.1976	1.13011	1.39577	1.39286	1.46255	1.22798	1.28885	1.21187	1.51478	1.3564	1.44581	0.983212	1.28178	1.17601	1.41706
A0A0H3BYC1	32	28	421.106	1.32611e-09	1.5344	34586.7	DNA-directed RNA polymerase subunit alpha OS=Streptococcus pyogenes serotype M49 (strain NZ131) OX=471876 GN=rpoA PE=3 SV=1	35.7629	37.7494	37.3854	32.7521	34.2776	35.6998	34.7274	33.65	38.4407	35.8365	32.7519	38.8506	36.5314	34.7466	37.2893	44.7292	43.855	47.087	51.8386	52.5147	52.9151	37.2786	35.4898	35.5588	33.7582	34.0679	35.5117	33.7282	33.194	35.573	36.9659	34.2431	35.606	35.813	36.1891	45.2237	52.4228	36.1091	34.4459	34.165
B5XJ72	85	73	1070.55	3.52554e-09	1.60778	132969	DNA-directed RNA polymerase subunit beta OS=Streptococcus pyogenes serotype M49 (strain NZ131) OX=471876 GN=rpoB PE=3 SV=1	10.6407	11.8055	11.879	9.72884	10.6743	11.4346	10.7358	11.2782	12.2487	11.5177	11.8504	11.828	11.5659	11.8826	12.546	16.2954	16.0489	17.4992	14.8404	15.7442	16.2147	11.1993	10.5391	11.417	10.0124	10.173	10.816	10.9793	10.5363	12.0577	11.4417	10.6126	11.4209	11.7321	11.9982	16.6145	15.5998	11.0518	10.3338	11.1911
A0A0H3BWG0	119	100	1462.44	1.10033e-08	1.43593	134964	DNA-directed RNA polymerase subunit beta' OS=Streptococcus pyogenes serotype M49 (strain NZ131) OX=471876 GN=rpoC PE=3 SV=1	18.102	20.8307	18.8638	17.5922	18.8166	18.7668	18.3578	19.2584	18.7546	17.9308	19.1631	19.2229	18.5502	19.1347	18.3991	25.6749	26.8543	24.6195	23.0367	26.4744	22.0965	18.0401	17.6307	18.0564	17.9545	18.1744	17.8378	17.9874	17.7793	18.4611	19.2655	18.3919	18.7903	18.7723	18.6946	25.7162	23.8692	17.9091	17.9889	18.0759
B5XIE6	7	6	66.3151	2.31359e-05	1.47209	9146.22	DNA-directed RNA polymerase subunit epsilon OS=Streptococcus pyogenes serotype M49 (strain NZ131) OX=471876 GN=rpoY PE=3 SV=1	3.20149	3.46574	3.01372	3.43842	3.83894	3.34068	3.10022	3.43615	3.06312	3.07173	3.47299	3.27725	3.26447	3.56372	3.30746	3.73953	4.34513	3.83723	4.14768	5.13314	4.27012	3.0917	3.49728	3.31332	2.96594	3.17662	3.06266	3.28697	3.24103	3.21199	3.22698	3.53935	3.19983	3.27399	3.37855	3.97396	4.51698	3.30077	3.06841	3.24666
B5XMI5	11	10	140.246	5.23797e-06	1.78818	11836.6	DNA-directed RNA polymerase subunit omega OS=Streptococcus pyogenes serotype M49 (strain NZ131) OX=471876 GN=rpoZ PE=3 SV=1	10.4247	13.0887	10.7378	10.1034	12.354	10.3314	10.7609	11.8689	10.9375	9.41296	9.68802	9.07177	11.0877	11.9322	10.1473	14.3826	15.1957	13.6397	10.8174	12.7206	10.3519	10.2776	11.347	9.94672	10.0097	10.7296	10.1061	8.15413	8.15535	7.85919	11.4171	10.9296	11.1891	9.39092	11.0557	14.406	11.2966	10.5238	10.2818	8.05622
A0A0H3BZS4	13	12	182.499	1.32822e-05	1.21704	22524.6	dTDP-4-dehydrorhamnose 3_5-epimerase OS=Streptococcus pyogenes serotype M49 (strain NZ131) OX=471876 GN=rmlC PE=4 SV=1	14.4723	14.914	13.5746	16.2307	17.4364	15.4587	15.9019	17.2603	15.0819	14.8422	14.082	13.5755	13.8849	14.0907	13.1127	15.6251	15.785	14.9191	14.3137	14.4023	13.7896	14.8918	14.7006	14.4537	16.2638	16.431	16.0884	16.9595	16.5741	16.4726	14.3203	16.3753	16.0814	14.1665	13.6961	15.4431	14.1686	14.682	16.2611	16.6687
A0A0H3BWM6	17	16	183.08	0.245946	1.33827	32183.2	dTDP-4-dehydrorhamnose reductase OS=Streptococcus pyogenes serotype M49 (strain NZ131) OX=471876 GN=rmlD PE=3 SV=1	4.68994	4.87859	5.61972	5.76083	5.06841	6.94348	4.70147	4.12897	5.69907	4.30404	4.06623	5.53308	5.18695	4.85384	6.14436	5.82207	5.04222	6.43503	6.05128	5.27311	7.28207	5.90838	4.73831	6.20718	6.11491	5.26358	6.44005	5.50903	4.78442	6.18402	5.06275	5.92424	4.84317	4.63445	5.39505	5.76644	6.20215	5.61796	5.93951	5.49249
A0A0H3C086	20	19	216.951	0.226739	1.20486	38893.5	dTDP-glucose 4_6-dehydratase OS=Streptococcus pyogenes serotype M49 (strain NZ131) OX=471876 GN=rmlB PE=3 SV=1	9.61145	9.08818	10.8689	9.42136	9.67239	10.7498	10.3632	9.59398	12.1496	10.8759	10.7145	12.7682	10.1141	8.92665	11.4543	11.5373	9.89196	13.1814	11.0799	10.3896	13.3319	10.1358	8.63012	10.8399	9.55906	9.12303	10.2021	9.71418	9.00413	10.4572	9.85618	9.94785	10.7023	11.4528	10.165	11.5369	11.6005	9.86861	9.62805	9.72517
A0A0H3C2R5	14	9	167.042	9.65783e-12	3.83514	38399.4	DUF4097 domain-containing protein OS=Streptococcus pyogenes serotype M49 (strain NZ131) OX=471876 GN=Spy49_1783 PE=4 SV=1	5.39509	5.46189	6.06899	3.81281	4.02161	4.74094	2.67495	2.32375	3.04055	1.6728	1.50795	1.99611	5.65336	5.09137	6.16257	5.66224	5.17386	6.34683	6.3019	6.04113	7.51098	6.22861	5.24354	6.18554	5.11732	4.52332	5.23763	3.64877	3.34765	3.82161	5.64199	4.19179	2.67975	1.72562	5.63577	5.72764	6.618	5.8859	4.95942	3.60601
A0A0H3BZE6	20	17	209.158	0.0621058	1.46503	54913.5	DUF853 domain-containing protein OS=Streptococcus pyogenes serotype M49 (strain NZ131) OX=471876 GN=Spy49_0418 PE=4 SV=1	1.57819	1.46165	1.8227	1.87239	1.79792	2.41811	1.72956	1.61551	2.26998	1.90708	1.65131	2.35788	1.68325	1.44748	1.93687	1.6486	1.58006	1.96526	1.3334	1.31332	1.57414	1.96564	1.68764	2.02823	2.04333	1.78576	2.35462	2.00921	1.81268	2.21929	1.62085	2.02948	1.87168	1.97209	1.6892	1.73131	1.40696	1.89384	2.06124	2.01373
A0A0H3BWN8	6	4	49.8447	0.444769	1.20775	16779.1	dUTP diphosphatase OS=Streptococcus pyogenes serotype M49 (strain NZ131) OX=471876 GN=dut PE=4 SV=1	0.44938	0.464264	0.48176	0.460166	0.538609	0.63659	0.466995	0.479146	0.583784	0.431687	0.42313	0.544432	0.453585	0.49088	0.59495	0.529521	0.510116	0.532699	0.535348	0.488077	0.508224	0.540094	0.481825	0.519718	0.570365	0.583943	0.530996	0.527897	0.598915	0.484569	0.465135	0.545122	0.509975	0.466416	0.513138	0.524112	0.51055	0.513879	0.561768	0.537127
A0A0H3BZC7	30	24	428.922	4.685e-08	2.27753	35537.6	EIIAB-Man OS=Streptococcus pyogenes serotype M49 (strain NZ131) OX=471876 GN=manL PE=4 SV=1	44.339	47.291	50.6642	31.046	33.8262	42.6914	38.5534	37.547	49.92	32.3835	29.9258	42.4679	42.1896	41.9807	51.3815	71.3345	67.7997	79.9265	75.9035	76.2242	86.5058	45.6463	40.1611	48.5992	37.0318	35.1329	40.2996	35.5056	33.4416	37.0793	47.4314	35.8546	42.0068	34.9258	45.1839	73.0202	79.5445	44.8022	37.4881	35.3422
A0A0H3BYW2	17	17	248.141	1.11022e-16	5.13629	61357.9	EIICB-Lac OS=Streptococcus pyogenes serotype M49 (strain NZ131) OX=471876 GN=lacE PE=4 SV=1	20.2582	20.1645	23.9488	3.97592	4.03019	4.52658	14.1632	13.8505	15.1414	14.9262	14.1937	16.7245	19.9837	17.757	20.5771	11.9595	11.0048	12.9593	13.0428	11.8889	14.8415	16.7912	14.5932	16.993	4.59898	4.37011	4.97024	5.21306	5.39207	6.21575	21.4572	4.17756	14.385	15.2815	19.4393	11.9745	13.2577	16.1258	4.64644	5.60696
B5XLC6	24	20	244.509	2.45726e-07	2.09949	68424.4	Elongation factor 4 OS=Streptococcus pyogenes serotype M49 (strain NZ131) OX=471876 GN=lepA PE=3 SV=1	6.34262	6.57844	5.77243	5.98103	6.76164	5.29127	6.38178	7.35231	5.68265	5.65722	6.10119	5.03512	6.02957	6.19782	5.80376	5.83059	6.28751	5.44232	3.43408	3.84135	3.43791	6.00305	6.46375	5.45488	6.12161	6.73978	6.10157	7.52095	7.67485	7.29673	6.23116	6.01131	6.47225	5.59784	6.01038	5.85347	3.57111	5.9739	6.32099	7.49751
B5XJR1	76	68	1167.83	0.399646	1.32145	76496.8	Elongation factor G OS=Streptococcus pyogenes serotype M49 (strain NZ131) OX=471876 GN=fusA PE=3 SV=1	79.872	79.1038	98.4573	87.7321	73.6363	104.451	79.306	73.7815	101.074	76.7463	72.2026	98.2931	90.1202	74.6258	99.8721	112.254	90.5459	123.918	99.2984	93.3191	115.262	93.3412	78.8863	98.4465	91.7699	76.0372	99.819	97.1626	81.3613	105.535	85.811	88.6064	84.7204	82.414	88.206	108.906	102.627	90.2246	89.2087	94.6863
B5XI32	9	7	116.406	0.00408249	1.35347	20466.3	Elongation factor P OS=Streptococcus pyogenes serotype M49 (strain NZ131) OX=471876 GN=efp PE=3 SV=1	23.7297	24.2857	27.4172	26.13	27.3509	28.712	26.2411	24.7732	27.5573	25.2018	26.0981	27.1659	29.1085	26.6356	29.4078	31.4511	28.4951	34.6076	31.2173	31.4967	39.3816	26.5085	24.3738	29.8594	27.5492	25.3756	29.2633	28.6676	27.3911	30.1919	25.1442	27.3976	26.1905	26.1553	28.384	31.5179	34.0319	26.9139	27.396	28.7502
B5XIY6	33	31	474.359	1.24678e-12	1.69122	37257.5	Elongation factor Ts OS=Streptococcus pyogenes serotype M49 (strain NZ131) OX=471876 GN=tsf PE=3 SV=1	58.3772	61.566	59.9326	55.615	59.0615	56.3296	47.5135	49.4976	49.703	40.0682	41.3285	41.9814	54.4728	52.1162	53.9794	70.1441	69.4408	69.0742	58.456	62.5921	59.8512	59.967	56.7712	59.0806	57.6213	55.096	59.6342	54.19	49.7675	54.4197	59.9586	57.002	48.9047	41.126	53.5228	69.553	60.2998	58.6063	57.4505	52.7924
B5XKI1	38	35	595.636	0.0313022	1.232	43913.7	Elongation factor Tu OS=Streptococcus pyogenes serotype M49 (strain NZ131) OX=471876 GN=tuf PE=3 SV=1	235.396	260.186	225.143	247.177	275.001	237.221	238.539	256.042	221.386	269.554	269.326	245.397	241.464	239.874	216.625	241.337	259.138	215.803	230.562	268.997	213.178	242.823	260.585	235.445	263.176	272.974	261.682	288.628	284.289	286.971	240.242	253.133	238.656	261.426	232.654	238.759	237.579	246.284	265.944	286.629
A0A0H3BXH0	26	21	272.043	5.24298e-07	1.89578	58378.4	Endolytic murein transglycosylase OS=Streptococcus pyogenes serotype M49 (strain NZ131) OX=471876 GN=mltG PE=3 SV=1	6.63034	7.27618	6.09992	6.5137	7.43479	5.72666	7.442	7.71373	6.50661	10.8585	13.2654	10.3381	6.21847	6.45689	5.50291	6.70289	6.74057	6.2239	6.41481	6.66717	5.68821	6.22978	6.5176	5.94206	6.37992	6.75162	6.30535	6.66166	6.49989	6.42022	6.66881	6.55839	7.22078	11.4873	6.05942	6.55579	6.25673	6.22982	6.47897	6.52725
B5XI46	28	25	210.186	4.67336e-07	1.38434	87947.4	Endonuclease MutS2 OS=Streptococcus pyogenes serotype M49 (strain NZ131) OX=471876 GN=mutS2 PE=3 SV=1	1.33544	1.2681	1.31126	1.12877	1.18048	1.26831	1.33238	1.31675	1.40473	1.42243	1.37976	1.42697	1.29287	1.31574	1.40908	1.59489	1.57573	1.56935	1.39608	1.33602	1.40959	1.20154	1.34232	1.18763	1.09844	1.18026	1.14528	1.15792	1.26723	1.30138	1.30493	1.19252	1.35129	1.40972	1.33923	1.57999	1.38056	1.24383	1.14133	1.24218
A0A0H3BY71	31	28	295.676	0.000357617	2.02042	99939.3	Endonuclease/Exonuclease/phosphatase family protein OS=Streptococcus pyogenes serotype M49 (strain NZ131) OX=471876 GN=Spy49_0578 PE=4 SV=1	2.6895	2.30207	3.17648	1.94467	1.84395	2.27067	2.27008	1.95539	2.73517	2.85082	2.50467	3.41862	2.89371	2.57073	3.5686	3.09281	2.44758	3.21981	3.94876	3.09584	4.67284	3.03864	2.55852	3.12607	2.14545	1.57142	2.27585	1.9496	1.7021	2.14782	2.72268	2.01976	2.32022	2.9247	3.01102	2.92007	3.90581	2.90774	1.99757	1.93317
A0A0H3C119	19	16	273.34	6.0696e-05	2.48199	42774.5	Endopeptidase degP OS=Streptococcus pyogenes serotype M49 (strain NZ131) OX=471876 GN=degP PE=3 SV=1	13.4629	14.1277	16.4293	17.3035	17.5959	24.7093	15.013	13.6161	20.107	10.5963	9.58243	14.4605	15.1895	13.2336	17.6226	15.3304	12.9719	18.3256	14.868	15.5687	17.6502	18.0269	14.5571	19.6551	19.6152	16.6204	22.2601	8.25886	6.59744	9.16018	14.6733	19.8696	16.2453	11.5464	15.3486	15.5426	16.029	17.4131	19.4986	8.00549
B5XK72	2	2	23.4317	0.0856444	1.50663	19197.4	Endoribonuclease YbeY OS=Streptococcus pyogenes serotype M49 (strain NZ131) OX=471876 GN=ybeY PE=3 SV=1	1.00663	1.04352	0.921595	1.16115	1.25931	0.819102	0.977743	0.9593	0.690771	1.06965	1.12552	0.813136	1.19227	1.2119	0.866645	0.931119	1.04533	0.854851	0.980486	1.20742	0.925747	0.944629	1.10844	1.0572	1.07475	1.23295	1.16325	1.40802	1.29501	1.25612	0.990582	1.07985	0.875938	1.00277	1.09027	0.943767	1.03788	1.03676	1.15698	1.31972
A0A0H3C0G0	9	9	80.1133	0.881575	1.2508	30862.9	Energy-coupling factor transporter ATP-binding protein EcfA OS=Streptococcus pyogenes serotype M49 (strain NZ131) OX=471876 GN=ecfA PE=3 SV=1	2.39358	2.41664	3.19077	3.19091	2.54085	4.25818	2.94662	2.71795	4.34306	2.52243	2.69125	3.68354	2.74384	2.3156	3.3056	2.81568	2.38517	3.50775	3.10414	2.6313	3.7619	2.83529	2.34249	2.97102	2.9644	2.70735	3.61064	2.78153	2.58347	3.50906	2.667	3.32998	3.33587	2.96574	2.78835	2.90287	3.16578	2.71626	3.09413	2.95802
A0A0H3C103	7	7	64.4685	1.2379e-13	2.20531	33269.3	Energy-coupling factor transporter ATP-binding protein EcfA OS=Streptococcus pyogenes serotype M49 (strain NZ131) OX=471876 GN=ecfA PE=3 SV=1	1.13263	1.17923	1.24168	0.829249	0.851931	0.840233	1.10803	1.12725	1.18864	1.00851	0.997181	1.0857	1.27812	1.2507	1.29284	1.75732	1.67342	1.96296	1.56516	1.64873	1.88551	1.01048	1.02373	1.06729	0.830266	0.790381	0.825132	0.919139	0.907958	0.935315	1.18451	0.840471	1.14131	1.03047	1.27389	1.7979	1.6998	1.03383	0.81526	0.920804
A0A0H3C1S6	5	3	32.2031	4.3227e-06	2.23346	40419.5	EnnX protein OS=Streptococcus pyogenes serotype M49 (strain NZ131) OX=471876 GN=ennX PE=3 SV=1	1.28756	1.41647	1.13225	1.08916	1.24795	0.894294	0.909382	0.900354	0.718909	0.670261	0.645601	0.521225	1.06281	1.08542	0.892268	1.1725	1.27935	0.946324	1.38935	1.54195	1.17176	1.10925	1.17822	1.03581	1.00717	1.04483	0.920031	0.757427	0.80783	0.696243	1.27876	1.07714	0.842882	0.612362	1.0135	1.13272	1.36769	1.10776	0.99068	0.753834
B5XKM7	43	41	626.978	0.161412	1.56157	47413.5	Enolase OS=Streptococcus pyogenes serotype M49 (strain NZ131) OX=471876 GN=eno PE=3 SV=1	166.63	141.558	191.863	164.843	124.925	184.398	154.066	127.196	187.176	141.836	109.435	177.575	165.491	129.159	178.102	202.062	161.48	217.914	216.479	192.357	260.838	176.882	148.084	194.878	174.039	140.78	183.994	169.738	136.603	178.746	166.684	158.055	156.146	142.949	157.584	193.819	223.225	173.281	166.271	161.696
A0A0H3BYD3	19	16	241.178	0	4.92626	33916.3	Enoyl-(Acyl-carrier-protein) reductase (FMN) OS=Streptococcus pyogenes serotype M49 (strain NZ131) OX=471876 GN=fabK PE=4 SV=1	9.24231	11.2749	9.69083	4.31733	4.93789	4.4255	8.58361	9.26821	8.58366	8.42368	9.22174	8.32566	15.2792	16.0418	14.8301	21.7257	23.2003	22.4688	15.4008	18.0278	16.3773	7.93818	7.77483	8.10429	5.94755	6.12974	5.80692	7.33339	7.2854	7.27836	10.0694	4.56024	8.81183	8.65703	15.3837	22.4649	16.602	7.9391	5.9614	7.29905
A0A0H3BVN6	2	2	12.4267	0.0922726	3.66043	27176.4	Epoxyqueuosine reductase QueH OS=Streptococcus pyogenes serotype M49 (strain NZ131) OX=471876 GN=queH PE=3 SV=1	0.0484204	0.0310915	0.0893075	0.0340365	0.012399	0.0604399	0.0542774	0.0476518	0.0972834	0.0603209	0.0435795	0.127425	0.0706981	0.0370925	0.115547	0.12098	0.0668898	0.177308	0.101936	0.0863561	0.202917	0.0683454	0.04003	0.0947197	0.0556073	0.0220251	0.0691707	0.0506322	0.0306083	0.0613536	0.0562731	0.0356251	0.0664042	0.0771083	0.0744458	0.121726	0.130403	0.0676983	0.0489343	0.0475314
B5XM83	18	17	146.725	0.293742	1.42933	50543	Exodeoxyribonuclease 7 large subunit OS=Streptococcus pyogenes serotype M49 (strain NZ131) OX=471876 GN=xseA PE=3 SV=1	2.381	2.07282	2.59734	2.10058	1.68261	2.49379	2.78885	2.43302	3.12549	2.67698	2.39251	3.25128	2.85982	2.11872	2.82135	2.93944	2.36256	3.23388	3.06872	2.07982	3.82331	2.62159	2.28844	2.8347	2.4638	2.03453	2.41823	2.47726	2.23144	2.50524	2.35039	2.09233	2.78245	2.77359	2.59996	2.84529	2.99062	2.58157	2.30552	2.40465
B5XM82	5	4	53.0503	0.000176008	1.7451	7988.08	Exodeoxyribonuclease 7 small subunit OS=Streptococcus pyogenes serotype M49 (strain NZ131) OX=471876 GN=xseB PE=3 SV=1	3.33371	3.81579	3.08705	3.26078	3.8497	2.75227	3.39018	3.55685	2.67145	2.63646	2.63308	2.26904	3.04074	3.30498	2.5753	3.82134	4.20489	3.37263	4.20708	4.81329	4.00468	2.9174	3.33345	2.7401	3.00932	3.27036	2.88065	2.50709	2.62202	2.33468	3.41219	3.28759	3.20616	2.51286	2.97367	3.79962	4.34168	2.99699	3.05345	2.48793
A0A0H3BYV2	16	13	177.308	0.00115832	1.66332	34517.2	Exodeoxyribonuclease III OS=Streptococcus pyogenes serotype M49 (strain NZ131) OX=471876 GN=exoA PE=3 SV=1	4.03575	4.41456	3.34492	4.27181	4.61766	3.68736	3.48571	3.79293	3.18109	3.00438	3.11037	2.47439	3.88508	4.00203	3.39056	4.27077	5.04053	4.09253	4.74359	5.37806	4.16487	3.73463	4.33779	3.47953	3.71943	4.15253	3.47568	4.02638	4.22297	3.99648	3.93174	4.19228	3.48657	2.86305	3.75922	4.46794	4.76217	3.85065	3.78255	4.08194
A0A0H3C0P3	6	6	48.9198	3.22697e-12	19.8303	43224.5	Exotoxin type B OS=Streptococcus pyogenes serotype M49 (strain NZ131) OX=471876 GN=speB PE=3 SV=1	0.177401	0.198631	0.275078	0.274826	0.233684	0.341868	0.185293	0.148161	0.256985	1.43113	1.21195	1.90986	0.240823	0.197701	0.284848	0.115173	0.0973508	0.147902	0.0584121	0.0788056	0.0923773	0.258328	0.196826	0.276172	0.284523	0.206939	0.294109	0.307801	0.227851	0.324002	0.217036	0.283459	0.196813	1.51765	0.241124	0.120142	0.0765316	0.243775	0.261857	0.286551
A0A0H3BZ61	23	20	276.817	0	78.9997	27219.2	F420_ligase domain-containing protein OS=Streptococcus pyogenes serotype M49 (strain NZ131) OX=471876 GN=Spy49_0453 PE=4 SV=1	0.12345	0.138971	0.135293	0.15127	0.144662	0.198024	0.14153	0.134408	0.142742	0.140991	0.155444	0.155766	0.141915	0.142557	0.151095	10.0866	11.055	10.2777	5.40027	6.03025	5.75954	0.17306	0.161804	0.198616	0.143832	0.146624	0.157722	0.164508	0.159932	0.171782	0.132571	0.164652	0.13956	0.150734	0.145189	10.4731	5.73002	0.177827	0.149393	0.165407
A0A0H3BZ39	44	37	527.704	0.000649754	1.51763	45266	Fc-gamma receptor OS=Streptococcus pyogenes serotype M49 (strain NZ131) OX=471876 GN=Spy49_1672c PE=4 SV=1	14.0854	13.6571	15.6045	16.6232	15.5887	18.7016	13.0804	12.4878	15.6392	12.9393	11.7305	14.8254	13.1612	10.8556	12.8371	11.637	10.1908	11.7202	13.3226	12.4094	14.5797	14.9646	12.872	15.7227	17.4262	14.7763	18.3622	16.3595	14.4969	17.6758	14.449	16.9712	13.7358	13.165	12.2846	11.1827	13.4372	14.5198	16.8549	16.1774
B5XKX5	8	5	54.3833	1.36098e-11	2.16418	36291.2	Ferredoxin--NADP reductase OS=Streptococcus pyogenes serotype M49 (strain NZ131) OX=471876 GN=Spy49_0668 PE=3 SV=1	0.643273	0.5981	0.641161	0.557937	0.561992	0.553568	0.637482	0.642246	0.643645	0.593781	0.695314	0.67529	0.704896	0.676439	0.758855	1.07796	1.14348	1.05257	0.781979	0.662279	0.762113	0.596852	0.649728	0.556285	0.520991	0.515014	0.476808	0.648859	0.610594	0.619753	0.627511	0.557832	0.641124	0.654795	0.713397	1.09134	0.735457	0.600955	0.504271	0.626402
A0A0H3BX86	8	7	75.7999	5.17975e-12	1.77323	18034.4	Ferric transport regulator protein OS=Streptococcus pyogenes serotype M49 (strain NZ131) OX=471876 GN=Spy49_0165 PE=3 SV=1	2.21736	2.22359	2.19723	2.42039	2.77855	2.4397	2.37697	2.55584	2.44854	2.27868	2.19539	2.2553	2.21961	2.37635	2.27389	2.93173	2.96698	2.72504	3.87655	4.1849	3.70956	2.34371	2.32377	2.30158	2.40431	2.47296	2.40925	2.4009	2.55361	2.38415	2.21273	2.54621	2.46045	2.24313	2.28995	2.87458	3.92367	2.32302	2.42884	2.44622
A0A0H3BYU3	4	4	34.4596	3.33067e-16	8.22023	34905.2	Ferrichrome-binding periplasmic protein OS=Streptococcus pyogenes serotype M49 (strain NZ131) OX=471876 GN=fhuD PE=4 SV=1	0.462206	0.552	0.53651	0.52645	0.600885	0.553361	0.426748	0.439351	0.439744	0.392572	0.358353	0.431212	0.646604	0.68025	0.638518	0.552672	0.564638	0.546724	0.0671466	0.0796634	0.0922796	0.561444	0.599859	0.57869	0.576018	0.619338	0.594156	0.286379	0.30905	0.289182	0.516906	0.560232	0.435281	0.394046	0.655124	0.554678	0.0796965	0.579998	0.596504	0.29487
A0A0H3BX48	14	14	93.374	0.000503984	3.47449	128344	Fibronectin binding protein OS=Streptococcus pyogenes serotype M49 (strain NZ131) OX=471876 GN=prtF PE=4 SV=1	1.25231	1.03421	1.5565	1.83252	1.47257	2.3124	1.98913	1.56014	2.68123	0.587773	0.441429	0.764014	1.56461	1.27884	1.89938	1.8036	1.38859	2.07897	1.76733	1.25946	2.15788	1.56356	1.19236	1.72244	1.43434	1.07043	1.50881	1.33655	1.01305	1.47938	1.28101	1.8725	2.07683	0.597739	1.58094	1.75705	1.72822	1.49279	1.33786	1.27633
A0A0H3BZE9	5	5	63.9596	1.974e-07	1.50518	16369.8	Flavodoxin OS=Streptococcus pyogenes serotype M49 (strain NZ131) OX=471876 GN=flaV PE=3 SV=1	2.48789	2.60014	2.40638	2.29867	2.56419	2.72856	2.36183	2.50622	2.5577	2.46375	2.48885	2.63424	2.56817	2.9595	2.88237	3.08283	3.44281	3.12003	3.6008	4.00826	3.56806	2.6314	2.76759	2.57606	2.43729	2.67401	2.42666	2.60617	2.81908	2.88275	2.49814	2.53047	2.47525	2.52895	2.80335	3.21523	3.72571	2.65835	2.51265	2.76933
A0A0H3BZY2	9	9	84.2551	3.02056e-09	2.28778	19432.1	FMN_red domain-containing protein OS=Streptococcus pyogenes serotype M49 (strain NZ131) OX=471876 GN=Spy49_1616c PE=4 SV=1	2.00735	2.08869	2.43444	2.48133	2.57034	3.04874	1.75406	1.80059	2.12789	1.17114	1.13278	1.23681	2.32478	2.45491	2.47295	2.33652	2.07363	2.53558	1.61592	1.42064	1.7133	2.55314	2.4396	2.72264	2.30215	2.18874	2.52546	2.18446	2.1458	2.30395	2.17683	2.70013	1.89418	1.18024	2.41755	2.31524	1.58328	2.57179	2.33878	2.2114
A0A0H3BYV6	28	26	366.779	8.61237e-09	1.64441	38592.4	Foldase protein PrsA OS=Streptococcus pyogenes serotype M49 (strain NZ131) OX=471876 GN=prtM1 PE=3 SV=1	30.2857	31.4321	28.4235	27.3822	30.6335	25.2036	24.9163	26.5155	23.0837	22.5049	22.8643	21.0691	30.7137	30.5834	28.0349	37.8404	37.7911	33.6205	35.0031	35.7231	33.0964	29.4157	29.912	27.4447	27.5759	28.5725	26.5538	23.4003	23.5537	23.7105	30.0471	27.7398	24.8385	22.1461	29.7773	36.4173	34.6075	28.9241	27.5674	23.5548
A0A0H3C2H2	24	19	288.54	0	5.19506	35277.5	Foldase protein PrsA OS=Streptococcus pyogenes serotype M49 (strain NZ131) OX=471876 GN=ropA PE=3 SV=1	9.50928	9.93079	9.01288	10.252	11.2427	10.3307	10.1408	10.7954	10.2289	22.642	22.5652	22.7315	7.59171	7.98692	7.44764	4.70959	5.09457	4.77924	4.16058	4.44373	4.47324	9.45514	9.47708	9.22026	10.7975	11.455	11.5257	9.81356	10.2285	9.75749	9.48432	10.6085	10.3884	22.6462	7.67542	4.86113	4.35918	9.38416	11.2594	9.93319
A0A0H3BZJ0	57	50	797.111	0	4.3276	87897.6	Formate acetyltransferase OS=Streptococcus pyogenes serotype M49 (strain NZ131) OX=471876 GN=pfl PE=3 SV=1	54.4515	54.0306	59.7854	15.2186	17.1922	17.5174	51.1831	51.3668	57.0012	58.837	56.767	63.4496	45.0127	42.8029	50.8951	36.1559	31.9682	36.3078	12.6666	13.4411	15.2671	41.3821	37.5414	42.3452	17.6785	18.0948	19.1121	26.1089	25.116	26.661	56.0891	16.6428	53.1837	59.6845	46.2369	34.8106	13.7916	40.4229	18.2951	25.962
A0A0H3BYF2	29	25	300.316	3.16021e-08	1.85091	59832.4	Formate--tetrahydrofolate ligase OS=Streptococcus pyogenes serotype M49 (strain NZ131) OX=471876 GN=fhs1 PE=3 SV=1	2.43648	2.68775	2.62073	3.91035	4.5434	3.7552	3.53657	4.42951	3.31147	3.28747	3.34106	3.01513	3.31604	3.40451	3.41387	4.68317	5.03548	4.61659	3.65784	4.21491	3.98761	2.65702	2.98621	2.7741	2.58634	3.02216	2.80926	2.99833	3.00935	2.97534	2.58166	4.06965	3.75918	3.21455	3.37814	4.77841	3.95345	2.80578	2.80592	2.99434
A0A0H3C2K8	34	30	386.983	1.83187e-14	19.7935	59379.2	Formate--tetrahydrofolate ligase OS=Streptococcus pyogenes serotype M49 (strain NZ131) OX=471876 GN=fhs2 PE=3 SV=1	1.32714	1.31527	1.68714	1.42858	1.30178	1.92038	1.31043	1.1215	1.75349	17.3217	15.5199	21.9275	1.51223	1.32945	1.81616	0.877998	0.786977	1.10205	1.12094	1.02347	1.38639	2.3276	1.95519	2.47222	1.65642	1.40485	1.86021	1.7641	1.52187	1.95076	1.44318	1.55025	1.39514	18.2564	1.55261	0.922342	1.17693	2.25167	1.64049	1.74558
B5XIY3	10	10	94.8731	2.22045e-16	21.0833	36497.4	Formimidoylglutamase OS=Streptococcus pyogenes serotype M49 (strain NZ131) OX=471876 GN=hutG PE=3 SV=1	0.36692	0.316176	0.461763	0.512597	0.365421	0.567834	0.304845	0.236583	0.360534	6.19396	5.14785	7.67456	0.384891	0.307832	0.46283	0.861443	0.817578	0.957129	0.511711	0.436299	0.663842	0.54357	0.442738	0.556384	0.553102	0.442999	0.567175	0.528913	0.410686	0.542222	0.38162	0.481951	0.300654	6.33879	0.385184	0.878716	0.537284	0.514231	0.521092	0.49394
A0A0H3C1X3	8	7	90.9138	0	12.8991	21982.2	Formiminotetrahydrofolate cyclodeaminase OS=Streptococcus pyogenes serotype M49 (strain NZ131) OX=471876 GN=Spy49_1726 PE=4 SV=1	1.0256	0.94237	0.989833	1.05935	1.13922	1.10585	1.00673	1.04621	1.12014	10.3547	10.6845	11.1122	1.21533	1.27916	1.30055	0.80817	0.897794	0.786567	1.34428	1.45891	1.26189	1.35357	1.42815	1.41491	1.29338	1.30662	1.14955	1.94676	1.86562	1.96235	0.985935	1.10147	1.05769	10.7172	1.26501	0.830844	1.35503	1.39888	1.24985	1.92491
A0A0H3C1H3	18	18	265.982	0.0143441	1.55728	31322.5	Fructose-bisphosphate aldolase class II OS=Streptococcus pyogenes serotype M49 (strain NZ131) OX=471876 GN=fba PE=4 SV=1	105.754	106.011	123.362	97.9705	101.492	124.496	89.6247	85.1394	114.526	87.2239	80.0373	112.004	109.305	99.5723	131.479	140.262	126.747	167.885	122.428	126.059	154.743	120.959	104.766	130.151	111.352	100.284	119.104	117.971	103.248	129.509	111.709	107.986	96.4302	93.0885	113.452	144.965	134.41	118.626	110.247	116.909
A0A0H3BZB1	4	4	32.7552	7.79043e-13	2.19588	18407	GAF domain-containing protein OS=Streptococcus pyogenes serotype M49 (strain NZ131) OX=471876 GN=Spy49_1088c PE=4 SV=1	0.689968	0.734277	0.704032	0.967244	1.09371	0.979693	0.903039	0.977281	0.923735	0.983982	1.11807	1.0413	0.956798	0.959879	0.988775	0.814335	0.854985	0.817188	0.546995	0.625721	0.571952	0.831374	0.837801	0.834847	0.910233	0.98595	0.963707	1.22147	1.27701	1.33261	0.709426	1.01355	0.934685	1.04779	0.968484	0.828836	0.581556	0.834674	0.953297	1.27703
A0A0H3C104	12	8	138.018	1.11022e-16	5.47117	15126.4	Galactose-6-phosphate isomerase subunit LacA OS=Streptococcus pyogenes serotype M49 (strain NZ131) OX=471876 GN=lacA PE=3 SV=1	5.94173	5.76558	6.34556	2.1295	1.85152	2.14348	7.15786	6.0538	7.12267	11.16	9.8865	12.4617	6.31661	5.43158	6.16269	3.43103	3.15857	3.38967	3.16193	3.55226	3.60976	6.07036	5.42492	5.82213	2.43428	2.31634	2.38097	2.38346	2.07296	2.43934	6.01762	2.0415	6.77811	11.1694	5.97029	3.32643	3.44132	5.77247	2.3772	2.29859
A0A0H3C276	14	10	166.23	2.18714e-13	7.28474	15469.7	Galactose-6-phosphate isomerase subunit LacA OS=Streptococcus pyogenes serotype M49 (strain NZ131) OX=471876 GN=lacA2 PE=3 SV=1	18.5393	18.7172	21.9718	2.60644	2.18898	3.33504	14.8541	13.6139	19.8445	14.0517	13.1464	18.551	17.2162	15.4395	20.1941	10.0313	8.95467	11.3802	8.58281	8.95164	10.791	14.9172	12.3004	16.6291	3.11233	2.60151	3.73819	3.72521	3.04915	3.80857	19.7428	2.71015	16.1042	15.2497	17.6166	10.122	9.44181	14.6155	3.15068	3.52765
A0A0H3BZV2	12	7	162.079	1.11022e-16	5.2381	19270.8	Galactose-6-phosphate isomerase subunit LacB OS=Streptococcus pyogenes serotype M49 (strain NZ131) OX=471876 GN=lacB PE=3 SV=1	7.53555	7.39434	8.29288	2.54316	2.42968	2.82075	8.33267	7.68077	9.16129	13.4368	12.3978	14.9891	8.14199	7.57215	8.53422	5.09659	4.64033	5.53486	6.07666	5.33384	6.27616	8.09142	7.19069	8.16299	2.80708	2.62351	3.06969	2.88665	2.63584	2.89821	7.74093	2.59787	8.39158	13.6079	8.08279	5.09059	5.89555	7.81503	2.83342	2.8069
A0A0H3C1J9	12	9	160.54	1.22125e-14	5.00737	19050.5	Galactose-6-phosphate isomerase subunit LacB OS=Streptococcus pyogenes serotype M49 (strain NZ131) OX=471876 GN=lacB2 PE=3 SV=1	20.4014	19.2024	22.227	3.98994	3.66631	4.70533	18.015	16.2972	21.0786	20.2406	18.9429	22.7154	21.1075	17.7776	21.9579	12.9496	10.9056	14.564	12.1161	10.8067	14.0632	16.7337	15.0131	17.9254	4.65282	4.26117	5.36178	5.34811	4.61254	5.54166	20.6103	4.12052	18.4636	20.633	20.281	12.8064	12.3287	16.5574	4.75859	5.16744
B5XML5	8	8	63.7534	0.0104167	1.37298	45584.6	Gamma-glutamyl phosphate reductase OS=Streptococcus pyogenes serotype M49 (strain NZ131) OX=471876 GN=proA PE=3 SV=1	1.18746	1.35846	1.11295	1.20719	1.43776	1.16801	1.16483	1.22298	1.1526	1.07074	1.19024	1.07148	1.05282	1.25125	1.04678	1.1673	1.37371	1.14699	1.45473	1.73683	1.38383	1.15611	1.31488	1.17981	1.08219	1.21079	1.19245	1.12051	1.20915	1.10853	1.21963	1.27099	1.18014	1.11082	1.11695	1.22933	1.52513	1.21693	1.16181	1.14606
A0A0H3BXG9	3	3	28.4683	0.000184753	2.19032	15641.9	Global transcriptional regulator Spx OS=Streptococcus pyogenes serotype M49 (strain NZ131) OX=471876 GN=spx PE=3 SV=1	1.36168	1.27769	1.52803	1.22909	1.1021	1.18538	1.24381	1.04779	1.38724	1.03684	0.936893	1.18685	1.72372	1.14208	1.50045	1.73912	1.37609	1.64141	0.685895	0.709582	0.776172	1.41248	1.12237	1.39091	1.37937	1.0297	1.35377	1.50288	1.1416	1.53529	1.38914	1.17219	1.22628	1.05353	1.45542	1.58554	0.723883	1.30858	1.25428	1.39326
A0A0H3BYZ4	13	13	112.4	2.68519e-12	1.69333	61739.5	Glucan 1_6-alpha-glucosidase OS=Streptococcus pyogenes serotype M49 (strain NZ131) OX=471876 GN=dexB PE=4 SV=1	1.6191	1.55148	1.73203	1.12736	1.15506	1.14109	1.53344	1.53253	1.65121	1.54723	1.51507	1.63964	1.4826	1.47581	1.61614	1.06354	1.09177	1.10696	0.944202	0.902083	1.04897	1.52123	1.49041	1.50717	1.27217	1.2995	1.33859	1.49822	1.42527	1.42621	1.6342	1.14117	1.57239	1.56731	1.52485	1.08742	0.965084	1.50627	1.30342	1.4499
A0A0H3BZK3	17	14	176.662	2.76457e-12	1.77553	33567.9	Glucokinase OS=Streptococcus pyogenes serotype M49 (strain NZ131) OX=471876 GN=Spy49_1181c PE=3 SV=1	6.62489	7.58597	6.85093	6.0341	6.52497	6.06912	7.02498	7.01897	7.10051	6.7763	6.99165	7.31117	6.8268	6.8951	6.40009	8.2225	8.56866	8.1227	10.5742	11.4092	10.496	6.60632	6.72416	6.81529	6.49911	6.4188	6.63513	6.06614	5.86343	6.36318	7.0206	6.2094	7.04815	7.02637	6.70733	8.30462	10.8265	6.71526	6.51768	6.09758
B5XM45	14	13	137.901	0.000427948	1.65488	25764.3	Glucosamine-6-phosphate deaminase OS=Streptococcus pyogenes serotype M49 (strain NZ131) OX=471876 GN=nagB PE=3 SV=1	6.38912	7.1302	5.40414	6.22049	7.19218	5.81055	5.54398	6.22961	5.42783	5.37494	5.89568	5.27801	5.97123	6.43932	5.8429	5.36569	6.61762	5.34278	9.02254	10.0931	8.27031	6.25388	7.27398	5.93356	6.94832	8.45987	6.19586	6.70947	7.68418	7.00413	6.30782	6.40774	5.7338	5.51621	6.08448	5.77536	9.12865	6.48714	7.20135	7.13259
A0A0H3BYI5	21	17	246.019	0.00127282	1.51926	32166.8	Glucose-1-phosphate thymidylyltransferase OS=Streptococcus pyogenes serotype M49 (strain NZ131) OX=471876 GN=rmlA PE=3 SV=1	10.7487	12.952	12.279	12.0274	14.4469	15.2628	12.9724	13.0482	15.8128	13.687	15.4256	20.0946	10.6705	10.9166	11.7548	9.98002	10.8071	12.9367	9.84961	10.7069	11.8325	11.9772	11.6837	12.4883	12.4838	13.8456	13.3623	14.2056	14.7385	15.5234	11.9932	13.9124	13.9445	16.4024	11.114	11.2413	10.7963	12.0497	13.2306	14.8225
B5XJM0	27	22	314.954	9.8952e-07	1.47659	49496.9	Glucose-6-phosphate isomerase OS=Streptococcus pyogenes serotype M49 (strain NZ131) OX=471876 GN=pgi PE=3 SV=1	28.7949	31.5681	32.4504	30.164	33.837	32.7469	30.0157	29.6872	33.2833	25.4803	25.5411	30.0891	32.6825	31.9836	33.1619	31.0081	29.7346	32.402	24.7939	26.5808	26.45	32.1111	31.1599	33.7031	34.7703	34.6498	36.2585	38.8596	36.4284	39.6273	30.9378	32.2493	30.9954	27.0368	32.6093	31.0482	25.9415	32.3247	35.2262	38.3051
A0A0H3C0S8	21	18	256.021	0	27.4897	33608.2	Glutamate formimidoyltransferase OS=Streptococcus pyogenes serotype M49 (strain NZ131) OX=471876 GN=Spy49_1725 PE=4 SV=1	1.55035	1.77327	1.53886	1.62131	1.93532	1.50653	1.6697	1.76353	1.38343	27.2368	27.8159	25.026	1.69412	1.78646	1.66137	1.07282	1.00839	1.06661	1.03438	0.929649	0.949008	2.71669	2.90807	2.5168	1.75904	1.96406	1.73156	2.04432	2.11716	1.96151	1.62083	1.68772	1.60555	26.6929	1.71398	1.04927	0.971014	2.71385	1.81822	2.041
B5XJX3	9	9	86.7586	9.45e-08	1.46833	29357.3	Glutamate racemase OS=Streptococcus pyogenes serotype M49 (strain NZ131) OX=471876 GN=murI PE=3 SV=1	0.928732	0.859218	0.862825	0.887738	0.99088	0.847536	0.857696	0.95238	0.856363	1.04061	1.04199	1.02228	0.821704	0.816961	0.877231	0.798716	0.857722	0.838896	0.704477	0.721333	0.688749	0.865205	0.835927	0.848383	0.913909	0.916651	0.934189	0.944284	0.996602	0.992855	0.883592	0.908718	0.888813	1.03496	0.838632	0.831778	0.704853	0.849838	0.921583	0.977914
B5XJN3	31	29	301.02	9.97626e-11	1.60689	56915.6	Glutamate--tRNA ligase OS=Streptococcus pyogenes serotype M49 (strain NZ131) OX=471876 GN=gltX PE=3 SV=1	6.84177	7.31981	7.32988	4.94069	5.40261	5.53158	5.75872	6.41367	6.42419	6.22165	6.31117	6.74812	7.76393	7.46125	7.78336	7.34082	7.10268	7.42681	4.44202	5.16357	5.04723	6.33753	6.09615	6.75251	4.67788	4.65687	4.98389	5.05062	4.80123	5.20853	7.16382	5.29163	6.19886	6.42698	7.66951	7.29011	4.88427	6.3954	4.77288	5.02013
A0A0H3BXL5	51	45	637.829	1.64313e-14	1.93341	78332.3	Glutamine ABC transporter_ glutamine-binding protein/permease protein OS=Streptococcus pyogenes serotype M49 (strain NZ131) OX=471876 GN=glnP PE=3 SV=1	14.4541	14.3771	14.9888	17.3394	16.9136	16.8428	11.7555	11.5982	12.2801	11.7287	10.5192	11.721	12.5203	11.2904	12.1364	9.07791	8.57807	8.77186	11.2689	10.5719	11.6837	14.9176	14.2143	15.1763	15.8368	15.459	16.3296	17.2912	16.3942	17.0629	14.6067	17.0319	11.8779	11.323	11.9823	8.80928	11.1749	14.7694	15.8751	16.9161
A0A0H3C027	3	3	20.9738	2.9793e-06	1.63422	25798.6	Glutamine amidotransferase_ class I OS=Streptococcus pyogenes serotype M49 (strain NZ131) OX=471876 GN=Spy49_0871c PE=4 SV=1	0.614429	0.616794	0.667971	0.907981	0.754054	0.919753	0.630983	0.517454	0.619187	0.530988	0.467432	0.58141	0.601815	0.533116	0.605444	0.774805	0.694313	0.810662	0.817094	0.751451	0.900783	0.695152	0.687209	0.748402	0.799108	0.743756	0.836707	0.724112	0.690101	0.791942	0.633065	0.860596	0.589208	0.52661	0.580125	0.759926	0.823109	0.710254	0.79319	0.735385
A0A0H3BZS1	32	30	446.635	1.25455e-14	2.01038	50611.7	Glutamine synthetase I alpha OS=Streptococcus pyogenes serotype M49 (strain NZ131) OX=471876 GN=glnA PE=3 SV=1	15.6837	17.045	16.3956	15.6665	17.3498	16.9796	11.7026	12.2192	12.4634	12.5261	12.9212	13.1325	14.1641	15.1516	14.1918	9.40117	10.2559	9.96181	10.8113	12.1818	11.1216	15.7117	16.2061	16.5815	17.5128	17.892	17.9867	19.4864	20.0706	19.9882	16.3748	16.6653	12.1284	12.8599	14.5025	9.87297	11.3716	16.1664	17.7972	19.8484
A0A0H3BYP5	13	11	201.186	5.92791e-09	1.81962	27191.4	Glutamine transport ATP-binding protein glnQ OS=Streptococcus pyogenes serotype M49 (strain NZ131) OX=471876 GN=glnQ PE=4 SV=1	22.456	25.8766	23.5677	24.699	29.5199	30.6488	20.3825	20.4331	22.2044	20.0839	20.318	22.8987	19.1747	19.8557	21.3601	15.2097	15.1961	16.2553	19.5712	22.2025	19.3935	22.6547	23.2627	24.3413	26.6579	26.6492	25.5002	27.3679	27.7535	29.7842	23.9668	28.2892	21.0067	21.1002	20.1301	15.5537	20.3891	23.4196	26.2691	28.3019
A0A0H3C0V3	46	39	650.294	0.000451108	1.44016	65748	Glutamine--fructose-6-phosphate aminotransferase [isomerizing] OS=Streptococcus pyogenes serotype M49 (strain NZ131) OX=471876 GN=glmS PE=3 SV=1	20.5856	22.6892	23.8486	25.54	28.2377	30.6077	18.0997	17.8931	22.6015	20.0201	18.8367	25.0132	19.8594	19.3755	22.1075	19.815	18.5904	22.201	22.0675	24.4085	21.9065	24.245	22.0625	26.6636	28.1617	24.7115	30.3543	28.7388	24.7423	30.5035	22.3745	28.1285	19.5315	21.29	20.4475	20.2021	22.7942	24.3237	27.7425	27.9948
B5XHZ9	32	24	351.849	5.91216e-12	1.55782	52265.3	Glutamyl-tRNA(Gln) amidotransferase subunit A OS=Streptococcus pyogenes serotype M49 (strain NZ131) OX=471876 GN=gatA PE=3 SV=1	8.9567	9.15723	8.95781	7.59219	8.24773	7.88739	8.36808	8.97131	8.08069	9.20868	9.98662	10.1157	8.80199	8.37887	8.16613	10.6442	10.4483	10.0833	11.1916	12.0664	11.3669	8.36748	8.31746	8.33801	7.78419	7.71916	7.7023	7.4717	7.38115	7.37368	9.02391	7.9091	8.47336	9.77034	8.449	10.3919	11.5416	8.34098	7.73522	7.40884
A0A0H3C128	2	2	26.5028	9.91411e-07	3.70295	9562.02	Glutaredoxin-like protein NrdH OS=Streptococcus pyogenes serotype M49 (strain NZ131) OX=471876 GN=nrdH PE=3 SV=1	2.34683	2.04312	2.62914	2.66461	2.49868	3.47803	2.36523	2.04311	3.09194	1.10826	1.3535	1.63302	3.26036	2.55131	3.87004	5.06878	3.91353	5.70415	1.20178	1.19071	1.57365	2.73347	1.95956	2.92564	2.51649	2.10313	2.70686	1.98347	1.54162	2.19134	2.3397	2.88044	2.50009	1.36493	3.22723	4.89548	1.32205	2.53956	2.44216	1.90548
A0A0H3BXH9	7	6	51.5515	0.000236413	1.29792	18224.8	Glutathione peroxidase OS=Streptococcus pyogenes serotype M49 (strain NZ131) OX=471876 GN=Spy49_0511c PE=3 SV=1	1.73302	1.91751	1.70351	1.90631	1.98261	1.8064	1.82965	1.8945	1.75831	2.01663	2.33933	2.02159	1.79888	1.759	1.75921	1.67393	1.74872	1.65218	1.69572	1.57287	1.64509	1.78111	1.8489	1.68517	1.75779	2.01429	1.86946	1.93199	1.94315	2.08854	1.78468	1.89844	1.82749	2.12585	1.77236	1.69161	1.63789	1.77173	1.88051	1.98789
A0A0H3BY97	8	8	55.3798	4.27769e-12	1.93885	49024.8	Glutathione reductase OS=Streptococcus pyogenes serotype M49 (strain NZ131) OX=471876 GN=gor PE=3 SV=1	0.999091	1.11729	1.05426	1.46912	1.36014	1.43801	1.13847	1.09549	1.26732	1.28678	1.26133	1.39774	1.08244	1.04509	1.03934	0.805451	0.787527	0.754233	0.929452	0.88016	1.00559	1.28144	1.32811	1.24317	1.47273	1.52613	1.39138	1.57395	1.46267	1.51425	1.05688	1.42242	1.16709	1.31529	1.05563	0.782403	0.938401	1.28424	1.46341	1.51696
A0A0H3BYM9	35	32	554.914	0.252329	1.27356	36056.8	Glyceraldehyde-3-phosphate dehydrogenase OS=Streptococcus pyogenes serotype M49 (strain NZ131) OX=471876 GN=plr PE=3 SV=1	262.689	304.18	236.175	258.863	304.136	230.418	253.676	280.404	226.091	244.634	259.591	221.095	239.679	253.722	215.092	258.527	288.192	237.303	255.846	298.163	233.242	254.293	288.359	240.806	277.115	305.783	260.506	297.907	316.299	288.1	267.681	264.472	253.39	241.773	236.165	261.34	262.417	261.152	281.135	300.769
A0A0H3C0P9	7	7	76.0457	0	3.96909	38767.1	Glycerol dehydrogenase OS=Streptococcus pyogenes serotype M49 (strain NZ131) OX=471876 GN=gldA PE=4 SV=1	1.1708	1.15678	1.16277	1.12934	1.23625	1.0198	1.76664	1.81689	1.5823	1.85709	1.8544	1.72036	0.654552	0.606169	0.610521	0.532164	0.498878	0.521816	0.491927	0.401264	0.475346	0.924464	0.954659	0.892564	1.21589	1.21898	1.17216	1.54261	1.44426	1.43574	1.16345	1.12846	1.72194	1.81061	0.623747	0.517619	0.456179	0.923896	1.20234	1.4742
B5XMM6	3	2	19.1301	4.08443e-09	7.82828	56053.5	Glycerol kinase OS=Streptococcus pyogenes serotype M49 (strain NZ131) OX=471876 GN=glpK PE=3 SV=1	0.0402221	0.0282146	0.0559513	0.0256325	0.0298703	0.058761	0.0712842	0.0644256	0.101108	0.209753	0.203862	0.269263	0.0759291	0.0603376	0.0828408	0.0254332	0.0193675	0.0424315	0.031747	0.0396164	0.0761139	0.0791187	0.058083	0.104924	0.0498948	0.0382184	0.0618494	0.0546617	0.0537602	0.0681846	0.0414627	0.0380879	0.0789392	0.227626	0.0730358	0.0290774	0.0491591	0.0807086	0.0499875	0.0588688
B5XJM4	24	21	315.678	4.4721e-06	1.17517	36680.9	Glycerol-3-phosphate dehydrogenase [NAD(P)+] OS=Streptococcus pyogenes serotype M49 (strain NZ131) OX=471876 GN=gpsA PE=3 SV=1	23.9299	23.8358	24.5507	27.213	28.4143	27.0384	25.6563	25.5749	24.7976	26.587	25.1803	25.6758	24.5097	24.1601	24.4295	24.4159	23.7717	25.6836	23.5254	22.4923	24.326	26.1083	25.2784	24.9815	27.301	26.8055	26.524	25.4553	26.8319	26.7933	24.1055	27.5552	25.343	25.8144	24.3664	24.6237	23.4479	25.4561	26.8768	26.3602
A0A0H3BXP3	4	4	25.8591	2.84778e-08	4.25439	48865.6	Glycerol-3-phosphate transporter OS=Streptococcus pyogenes serotype M49 (strain NZ131) OX=471876 GN=glpT PE=4 SV=1	0.402128	0.350615	0.485514	0.200502	0.151409	0.23512	0.50394	0.442489	0.614264	0.797632	0.714857	0.984968	0.456173	0.407208	0.610615	0.395144	0.315577	0.42963	0.479503	0.414802	0.531654	0.39915	0.313929	0.432536	0.215864	0.186231	0.22583	0.204536	0.200649	0.247085	0.412753	0.195677	0.520231	0.832486	0.491332	0.380117	0.47532	0.381872	0.209309	0.217424
A0A0H3BXF1	2	2	36.5204	1.02141e-14	2.71544	12087.6	Glycine cleavage system H protein OS=Streptococcus pyogenes serotype M49 (strain NZ131) OX=471876 GN=Spy49_0963c PE=4 SV=1	2.81743	3.01525	2.77407	2.52022	2.8998	3.03164	3.36251	3.9233	3.65849	3.49384	3.94329	3.91707	5.52902	5.86606	5.68832	6.03321	6.50415	5.57256	5.26952	5.92792	5.55905	3.26792	2.93772	3.15163	2.19827	2.24467	2.30995	2.03041	2.28028	2.35854	2.86892	2.81722	3.6481	3.78473	5.69447	6.03664	5.5855	3.11909	2.25096	2.22308
B5XMN0	15	11	163.059	0.000142178	1.41871	34907.3	Glycine--tRNA ligase alpha subunit OS=Streptococcus pyogenes serotype M49 (strain NZ131) OX=471876 GN=glyQ PE=3 SV=1	8.17439	8.47234	8.74117	8.03168	8.27738	9.93437	8.8477	8.61714	10.0299	7.83856	7.74925	9.09065	9.07982	8.54059	9.97874	11.5688	10.77	12.6729	10.259	10.8256	12.1726	8.79827	8.26184	9.10965	8.65995	8.19788	8.98786	8.91564	8.01246	9.05573	8.46263	8.74781	9.16493	8.22615	9.19972	11.6706	11.0857	8.72325	8.61523	8.66128
B5XMM9	31	27	324.628	3.83582e-13	1.52625	75027.4	Glycine--tRNA ligase beta subunit OS=Streptococcus pyogenes serotype M49 (strain NZ131) OX=471876 GN=glyS PE=3 SV=1	5.63326	6.18929	5.74739	4.99789	4.99917	5.05298	5.46992	5.29702	5.46485	5.17714	5.22305	5.39844	5.68813	5.51247	5.82915	7.04108	7.04133	7.18171	7.5235	7.77734	7.66934	5.58388	5.652	5.79435	5.33493	4.82617	5.04888	5.06966	4.97713	5.36214	5.85664	5.01668	5.4106	5.26621	5.67659	7.08804	7.65672	5.67674	5.06999	5.13631
A0A0H3BXV2	12	12	129.556	0	42.1052	38308.1	Glyco_trans_2-like domain-containing protein OS=Streptococcus pyogenes serotype M49 (strain NZ131) OX=471876 GN=Spy49_0457 PE=4 SV=1	0.329131	0.29299	0.361746	0.300009	0.24868	0.349692	0.376074	0.293825	0.448813	0.5379	0.452251	0.665719	0.368985	0.295273	0.399217	13.1	12.2615	12.465	2.58347	2.2944	2.69756	0.434664	0.289745	0.428558	0.343571	0.239428	0.342214	0.339738	0.333927	0.360599	0.327956	0.29946	0.372904	0.551957	0.354492	12.6088	2.52514	0.384323	0.308404	0.344755
B5XLI1	17	13	158.899	1.69659e-06	2.23032	36143.2	GMP reductase OS=Streptococcus pyogenes serotype M49 (strain NZ131) OX=471876 GN=guaC PE=3 SV=1	2.00174	2.06306	1.72969	2.54041	2.9896	2.16272	1.73141	2.06678	1.51796	1.41097	1.66481	1.24867	1.65335	1.84945	1.42501	1.38556	1.60433	1.0938	1.3955	1.69432	1.19684	1.79134	1.99409	1.79516	2.51784	2.78186	2.20676	2.96817	3.36243	2.77731	1.9315	2.56424	1.77205	1.44149	1.6426	1.36123	1.42889	1.8602	2.50216	3.03597
B5XLN9	39	35	488.334	1.4988e-13	1.82047	57729.8	GMP synthase [glutamine-hydrolyzing] OS=Streptococcus pyogenes serotype M49 (strain NZ131) OX=471876 GN=guaA PE=3 SV=1	7.79975	8.26628	8.06569	6.94507	6.86842	7.11604	8.05307	7.91142	8.55697	7.90305	7.34517	7.78022	8.17712	7.936	8.15645	13.4003	11.9852	12.716	11.378	10.7098	12.2757	7.57385	7.27674	7.74974	7.00803	6.78382	7.36445	7.71434	7.53606	7.88745	8.04391	6.97651	8.17382	7.67615	8.08986	12.7005	11.4545	7.53344	7.0521	7.71262
A0A0H3C171	18	16	217.816	2.66222e-09	1.73315	69434.6	Group B oligopeptidase pepB OS=Streptococcus pyogenes serotype M49 (strain NZ131) OX=471876 GN=pepB PE=3 SV=1	4.38327	4.82602	4.29763	4.1896	4.72613	4.13127	4.45054	5.15311	5.16468	5.59885	5.51422	5.51879	4.32157	4.67361	4.66488	4.10297	4.0499	3.87767	3.30588	3.64089	3.56788	4.23797	4.23627	4.53895	4.6246	4.92436	4.45741	5.91057	6.16644	6.14652	4.50231	4.349	4.92278	5.54396	4.55335	4.01018	3.50489	4.33773	4.66879	6.07451
B5XLE8	22	16	286.836	0.0442328	1.42372	21899.5	GTP cyclohydrolase 1 OS=Streptococcus pyogenes serotype M49 (strain NZ131) OX=471876 GN=folE PE=3 SV=1	24.0796	27.5416	21.203	29.5477	38.1482	25.4615	27.8202	31.6237	21.9721	24.5109	27.0305	19.3187	21.8694	24.4127	19.1502	21.3928	25.1356	19.3328	22.2113	25.4103	20.7765	24.4217	27.0031	22.2567	28.8163	33.9403	26.964	27.7981	32.4147	26.3201	24.2747	31.0525	27.1387	23.62	21.8108	21.9537	22.7993	24.5605	29.9069	28.8443
A0A0H3BWW3	14	13	157.244	0.0698289	1.42338	29394.7	GTP cyclohydrolase 1 type 2 homolog OS=Streptococcus pyogenes serotype M49 (strain NZ131) OX=471876 GN=Spy49_0740 PE=3 SV=1	2.90471	3.51173	2.55542	2.95067	3.57101	2.51419	2.84137	3.06902	2.29222	2.62008	2.89873	2.08415	2.50965	2.73617	2.22504	2.50014	2.91183	2.16924	2.63359	3.08287	2.31709	2.88082	3.24118	2.61604	3.09322	3.63808	2.93877	3.46009	3.82333	3.35045	2.99062	3.01195	2.7342	2.53432	2.49029	2.52707	2.67785	2.91268	3.22336	3.54462
A0A0H3C041	8	8	73.3118	0.234679	1.1329	25293.1	GTP pyrophosphokinase OS=Streptococcus pyogenes serotype M49 (strain NZ131) OX=471876 GN=Spy49_0687 PE=4 SV=1	0.710573	0.613216	0.650432	0.729428	0.644197	0.774252	0.665381	0.665114	0.685541	0.651495	0.616915	0.653032	0.744211	0.644355	0.764449	0.656214	0.579243	0.664994	0.664208	0.683948	0.72568	0.681254	0.650344	0.673616	0.656929	0.679478	0.689872	0.726714	0.644866	0.774493	0.658074	0.715959	0.672012	0.640481	0.717671	0.633484	0.691279	0.668405	0.675426	0.715358
A0A0H3C033	18	14	164.448	3.74685e-06	1.59374	26287.1	GTP pyrophosphokinase OS=Streptococcus pyogenes serotype M49 (strain NZ131) OX=471876 GN=Spy49_0877 PE=4 SV=1	3.36101	3.31834	3.75979	4.13482	4.33052	4.72235	4.01424	4.79491	5.02041	4.07249	4.26337	4.6313	3.62462	3.6635	4.11323	3.32927	3.6112	4.00706	2.6791	2.94225	3.25006	4.06542	3.97188	4.26413	4.17181	4.44546	4.63282	4.53697	4.6913	4.91044	3.47971	4.39589	4.60986	4.32239	3.80045	3.64918	2.95714	4.10048	4.41669	4.7129
B5XJW0	25	21	292.962	0.071177	1.19063	48801.8	GTPase Der OS=Streptococcus pyogenes serotype M49 (strain NZ131) OX=471876 GN=der PE=3 SV=1	5.85489	6.43139	5.98575	5.58296	6.1014	5.18022	5.94227	6.14005	5.36576	6.05094	6.2129	5.58265	5.78194	6.46885	5.48508	6.51336	6.90014	6.10139	5.88167	5.86372	5.70502	5.82643	6.10573	5.46105	5.43989	5.78221	5.1683	6.33185	6.3385	6.07168	6.09068	5.62153	5.81602	5.94883	5.91196	6.50496	5.8168	5.79774	5.46347	6.24734
B5XK74	27	24	348.873	0.12614	1.27743	34106.7	GTPase Era OS=Streptococcus pyogenes serotype M49 (strain NZ131) OX=471876 GN=era PE=3 SV=1	5.8985	6.4789	5.28044	5.54936	6.98805	5.43947	5.73866	6.26012	5.52879	5.69993	6.14195	5.48423	5.90688	6.29746	5.47133	6.51175	7.25457	6.21451	6.48607	7.37517	5.52395	5.13606	5.52449	4.9809	5.22727	5.9554	5.27083	5.77127	6.01587	5.60258	5.88595	5.99229	5.84252	5.77537	5.89189	6.66028	6.46173	5.21382	5.4845	5.79657
A0A0H3BZR1	6	5	38.2135	1.92444e-08	1.41015	47182.1	GTPase HflX OS=Streptococcus pyogenes serotype M49 (strain NZ131) OX=471876 GN=hflX PE=3 SV=1	0.579175	0.549418	0.588186	0.605869	0.537752	0.588698	0.544427	0.559248	0.604413	0.657347	0.636648	0.688013	0.538382	0.528827	0.551985	0.556792	0.55302	0.549691	0.768856	0.68708	0.781791	0.582128	0.537828	0.551294	0.574593	0.583077	0.630827	0.733013	0.743643	0.806651	0.57226	0.57744	0.569363	0.660669	0.539731	0.553168	0.745909	0.557084	0.596166	0.761102
B5XLZ0	25	19	243.651	0.00748133	1.26447	48348.1	GTPase Obg OS=Streptococcus pyogenes serotype M49 (strain NZ131) OX=471876 GN=obg PE=3 SV=1	4.10503	4.48663	4.6051	4.49927	4.51032	5.19639	4.26906	4.00523	4.79642	4.47695	4.54511	4.80959	4.43056	4.5701	4.80599	5.32647	4.73418	5.4904	5.34401	4.98268	6.20086	4.50567	4.30906	4.6587	4.56671	4.22403	4.66185	4.50279	4.31627	4.65891	4.39892	4.73533	4.3569	4.61055	4.60222	5.18368	5.50918	4.49115	4.4842	4.49265
A0A0H3BZ46	21	16	168.904	6.10212e-05	1.40263	42085.4	GTP-binding protein OS=Streptococcus pyogenes serotype M49 (strain NZ131) OX=471876 GN=Spy49_0258 PE=4 SV=1	1.84909	1.70648	1.61576	1.78536	1.69678	1.94616	2.0831	1.85721	2.07926	2.32308	1.87882	2.16128	1.73051	1.7623	1.80121	2.19909	1.99523	1.90142	2.56712	2.30282	2.3835	1.72738	2.09719	1.88916	1.68799	1.73893	1.82426	1.71932	1.70121	1.77732	1.72378	1.80943	2.00652	2.12106	1.76467	2.03191	2.41781	1.90458	1.75039	1.73262
B5XI03	19	18	241.509	1.87457e-11	2.43039	28747.9	GTP-sensing transcriptional pleiotropic repressor CodY OS=Streptococcus pyogenes serotype M49 (strain NZ131) OX=471876 GN=codY PE=3 SV=1	6.04779	5.88208	6.44195	4.82274	4.61324	5.8681	5.29979	5.07966	5.99705	5.20264	4.87355	5.99419	8.33024	7.93864	9.17533	11.7649	11.2497	13.4094	11.1055	12.5232	13.5662	5.738	5.52531	6.04605	5.01523	4.80687	5.55522	5.68249	5.22608	6.344	6.12394	5.10136	5.45884	5.35679	8.4814	12.1413	12.3983	5.76978	5.12577	5.75086
A0A0H3C1I8	9	8	66.8995	0.0798688	1.23052	24065.4	Guanylate kinase OS=Streptococcus pyogenes serotype M49 (strain NZ131) OX=471876 GN=gmk PE=3 SV=1	2.31831	2.59475	2.1784	2.13723	2.3648	1.98369	2.55994	2.7201	2.36703	2.51378	2.7965	2.312	2.51939	2.85737	2.28256	2.26544	2.57142	2.12634	2.14726	2.53925	2.00285	2.21523	2.33699	2.1717	2.27372	2.45729	2.28779	2.62706	2.74529	2.6085	2.36382	2.16191	2.54902	2.54076	2.55311	2.32107	2.22979	2.24131	2.3396	2.66028
A0A0H3BZD0	14	14	109.514	0.381537	1.24067	50586.3	HD domain protein OS=Streptococcus pyogenes serotype M49 (strain NZ131) OX=471876 GN=Spy49_0520c PE=4 SV=1	1.67229	2.27343	1.63088	1.97817	2.34157	1.83139	2.07269	2.37065	1.84555	1.84121	2.16649	1.66046	1.73991	1.99958	1.50328	1.89949	2.05776	1.70165	1.74826	2.11345	1.64481	1.66288	1.74324	1.66282	1.90697	2.1127	1.89238	1.99651	2.24032	2.01051	1.85887	2.05038	2.0963	1.88939	1.74759	1.8863	1.83551	1.68965	1.97068	2.08244
A0A0H3BXF5	6	5	50.6166	2.10844e-08	1.37002	22604.9	HD domain-containing protein OS=Streptococcus pyogenes serotype M49 (strain NZ131) OX=471876 GN=Spy49_0261 PE=4 SV=1	0.853613	0.899871	0.89216	0.883382	0.928916	0.872935	0.937244	1.05115	0.945845	0.994843	1.02865	0.947617	0.903339	0.953756	0.96558	1.12203	1.12446	1.13065	1.19871	1.13179	1.25287	0.867006	0.931848	0.86267	0.837626	0.883014	0.894916	1.00803	1.03701	0.954212	0.881881	0.895078	0.97808	0.990371	0.940891	1.12571	1.19445	0.887175	0.871852	0.999753
A0A0H3BZZ4	10	8	88.5213	7.94524e-09	2.10076	39240	Heat-inducible transcription repressor HrcA OS=Streptococcus pyogenes serotype M49 (strain NZ131) OX=471876 GN=hrcA PE=3 SV=1	0.92545	0.945366	0.818373	0.954469	1.02806	0.840441	0.933764	1.0459	0.933747	1.15361	1.27587	1.13035	1.0089	1.04918	0.926498	1.0093	1.13422	0.877134	1.77364	1.90462	1.61528	0.888802	0.980422	0.844191	0.814587	0.908528	0.796702	0.912891	1.01146	0.918375	0.896397	0.940988	0.971138	1.18661	0.994859	1.00689	1.76451	0.904472	0.839939	0.947576
A0A0H3BYR7	11	7	78.019	0.00103599	1.78795	34145.9	Helicase loader DnaI OS=Streptococcus pyogenes serotype M49 (strain NZ131) OX=471876 GN=dnaI PE=4 SV=1	4.08887	4.55299	3.53841	3.38222	3.8059	3.03604	3.1611	3.36036	2.62171	2.87021	2.95026	2.39053	3.12522	3.76771	3.0331	3.87802	4.60332	3.5309	4.88495	5.49831	4.29757	3.36327	4.10831	3.21974	3.36816	4.06562	3.1945	3.28635	3.91961	3.2843	4.06009	3.40805	3.04772	2.737	3.30868	4.00408	4.89361	3.56377	3.54276	3.49676
A0A0H3BYW9	5	5	39.3155	0	4.65368	33346.7	Hexulose-6-phosphate isomerase OS=Streptococcus pyogenes serotype M49 (strain NZ131) OX=471876 GN=Spy49_0157 PE=4 SV=1	0.211935	0.246197	0.256622	0.139007	0.12929	0.112436	0.289266	0.303195	0.337981	0.609903	0.579558	0.58235	0.329898	0.304522	0.282068	0.208535	0.21819	0.216059	0.232682	0.224315	0.238268	0.337489	0.331699	0.334894	0.173717	0.144958	0.137601	0.173969	0.146403	0.148041	0.238251	0.126911	0.310147	0.590604	0.305496	0.214261	0.231755	0.334694	0.152092	0.156138
A0A0H3BYI1	5	4	38.8771	1.11022e-16	3.11028	24073.4	Hexulose-6-phosphate synthase OS=Streptococcus pyogenes serotype M49 (strain NZ131) OX=471876 GN=Spy49_0156 PE=4 SV=1	0.278022	0.273095	0.27887	0.235595	0.228038	0.205822	0.330408	0.332049	0.374763	0.654881	0.680936	0.746377	0.364141	0.345414	0.370274	0.303078	0.33273	0.307073	0.507029	0.543913	0.543961	0.342434	0.319722	0.34568	0.213562	0.240205	0.225083	0.247312	0.243869	0.249413	0.276662	0.223152	0.34574	0.694065	0.359943	0.314294	0.531634	0.335945	0.226283	0.246865
B5XIY2	27	25	322.121	0	18.4164	55867.6	Histidine ammonia-lyase OS=Streptococcus pyogenes serotype M49 (strain NZ131) OX=471876 GN=hutH PE=3 SV=1	0.956017	0.910852	0.936392	1.18696	1.04593	1.26964	0.875337	0.829663	1.02499	12.768	11.0021	17.9678	1.03325	0.992837	1.24596	0.762617	0.727411	0.776317	0.879447	0.789847	0.914643	1.4692	1.42954	1.49406	1.23723	1.19666	1.28498	1.25191	1.16202	1.33259	0.934421	1.16751	0.909995	13.9126	1.09068	0.755448	0.861312	1.46427	1.23962	1.24884
A0A0H3BXU7	3	3	27.9421	2.057e-07	2.19144	46592.8	Histidine kinase OS=Streptococcus pyogenes serotype M49 (strain NZ131) OX=471876 GN=Spy49_0689 PE=4 SV=1	0.459113	0.505429	0.388291	0.452449	0.551651	0.416484	0.511633	0.572832	0.434543	0.591128	0.628961	0.478946	0.447706	0.4446	0.373885	0.409309	0.461296	0.383585	0.403091	0.459738	0.352148	0.441781	0.465822	0.391282	0.443776	0.522873	0.451421	0.887399	0.957459	0.817689	0.450945	0.473528	0.506336	0.566345	0.422064	0.418063	0.404992	0.432962	0.47269	0.887516
A0A0H3BXU3	8	6	74.328	3.10555e-05	1.39685	51391.9	Histidine kinase OS=Streptococcus pyogenes serotype M49 (strain NZ131) OX=471876 GN=vicK PE=4 SV=1	0.681582	0.705776	0.630896	0.631972	0.683497	0.584339	0.771667	0.784051	0.704386	0.76357	0.790319	0.691303	0.657916	0.674373	0.5871	0.709848	0.752373	0.644881	0.813069	0.91272	0.796638	0.618369	0.610476	0.576954	0.636622	0.627784	0.587087	0.669854	0.641774	0.678202	0.672752	0.633269	0.753368	0.748397	0.639797	0.702367	0.840809	0.601933	0.617164	0.663277
B5XJ83	22	18	205.07	0.000286596	1.21645	48327.9	Histidine--tRNA ligase OS=Streptococcus pyogenes serotype M49 (strain NZ131) OX=471876 GN=hisS PE=3 SV=1	6.18071	6.65191	6.59317	6.00237	6.54333	6.43483	5.81295	5.6534	6.33906	5.85163	5.92358	6.08304	6.19586	6.05568	6.12133	6.39049	5.92992	6.85514	5.66838	5.77657	6.05472	6.52717	6.1904	6.83839	6.61064	6.79083	6.58779	7.14655	6.96391	7.17696	6.47527	6.32684	5.93514	5.95275	6.12429	6.39185	5.83323	6.51866	6.66309	7.09581
A0A0H3C016	20	18	189.544	0	3.73253	45398.9	HlyD_D23 domain-containing protein OS=Streptococcus pyogenes serotype M49 (strain NZ131) OX=471876 GN=Spy49_0655 PE=3 SV=1	2.59628	2.98802	2.72476	2.63258	2.93978	2.88152	2.71503	2.72748	2.74438	1.20822	1.3231	1.38718	2.62445	2.66515	2.5541	3.90476	3.99817	3.8912	3.14495	3.379	3.12777	2.77032	2.73596	2.81123	2.52162	2.46567	2.49713	0.990625	1.07535	1.09385	2.76969	2.81796	2.72896	1.30617	2.61457	3.93138	3.21724	2.7725	2.49481	1.05327
B5XJ07	4	3	36.4537	0.0534201	1.28815	21847.2	Holliday junction ATP-dependent DNA helicase RuvA OS=Streptococcus pyogenes serotype M49 (strain NZ131) OX=471876 GN=ruvA PE=3 SV=1	1.00112	1.07459	1.12266	1.22146	1.3812	1.41881	1.07624	1.05652	1.32684	1.0763	0.93405	1.15807	1.13977	0.900697	1.08143	1.08762	1.05565	1.20777	1.06636	1.04606	1.35719	1.16872	1.02164	1.16021	1.24595	1.14862	1.22811	1.28863	1.19292	1.34574	1.06612	1.34049	1.1532	1.05614	1.04063	1.11701	1.15654	1.11686	1.20756	1.27576
B5XJ28	2	2	14.0329	6.28442e-12	2.90453	37622.2	Holliday junction ATP-dependent DNA helicase RuvB OS=Streptococcus pyogenes serotype M49 (strain NZ131) OX=471876 GN=ruvB PE=3 SV=1	0.531423	0.631875	0.51652	0.355166	0.335616	0.323012	0.446642	0.454003	0.437275	0.328459	0.428913	0.341793	0.594817	0.660974	0.604505	0.802588	0.85322	0.720868	0.486521	0.486568	0.430697	0.412993	0.430573	0.427074	0.255488	0.302442	0.260335	0.288647	0.327207	0.283329	0.559939	0.337931	0.445973	0.366388	0.620099	0.792226	0.467929	0.423547	0.272755	0.299727
A0A0H3BXD6	29	24	275.563	1.99096e-05	1.39574	36895.5	HPr kinase/phosphorylase OS=Streptococcus pyogenes serotype M49 (strain NZ131) OX=471876 GN=ptsK PE=3 SV=1	8.17666	9.06567	8.57673	8.90826	10.212	10.4269	7.49909	7.36696	8.31025	7.25007	6.19353	7.72598	7.89319	8.49363	8.71956	6.96286	6.98206	7.57926	8.79392	9.5766	8.92852	7.96504	8.20002	8.10269	8.92877	8.93556	8.86365	8.5259	8.98508	8.36742	8.60635	9.84905	7.72544	7.05653	8.36879	7.17473	9.09968	8.08925	8.90933	8.62613
A0A0H3BZ71	26	19	311.059	0.000962276	1.25879	51754.9	Hydrolase_ haloacid dehalogenase family/peptidyl-prolyl cis-trans isomerase_ cyclophilin type OS=Streptococcus pyogenes serotype M49 (strain NZ131) OX=471876 GN=Spy49_1253c PE=4 SV=1	13.8031	16.6281	15.1624	16.2565	18.7597	18.8035	14.0912	14.9626	15.9642	13.1409	14.6134	15.0007	13.6339	14.8786	14.9569	15.0616	15.3305	16.2287	16.0612	17.8687	17.1841	15.1277	14.0286	15.2574	16.5472	16.3347	17.2216	16.4689	16.6985	17.49	15.1979	17.9399	15.006	14.2517	14.4898	15.5403	17.038	14.8046	16.7012	16.8858
A0A0H3C245	6	6	56.2734	8.22428e-11	3.88308	34966.4	Hydrolase_4 domain-containing protein OS=Streptococcus pyogenes serotype M49 (strain NZ131) OX=471876 GN=Spy49_1560c PE=4 SV=1	2.0612	2.32364	2.06128	1.89383	2.29007	1.79391	2.07982	2.29533	1.89219	1.71255	1.88099	1.38047	2.22568	2.47168	2.01131	2.3703	2.62327	2.43624	1.91889	2.14332	2.0305	1.85046	1.88281	1.91668	1.75588	1.88733	1.63063	0.619201	0.699472	0.594708	2.14871	1.9926	2.08911	1.658	2.23622	2.4766	2.0309	1.88332	1.75795	0.637794
A0A0H3BYD9	15	13	138.577	0.311604	1.23979	43605.4	Hydroxymethylglutaryl-CoA synthase OS=Streptococcus pyogenes serotype M49 (strain NZ131) OX=471876 GN=mvaS2 PE=4 SV=1	4.38043	4.08578	4.94425	5.54669	4.64577	6.14151	5.13769	4.43705	5.46021	4.98791	4.57389	5.82531	4.55559	3.79862	5.07961	4.73156	4.13857	5.25991	5.78151	4.93939	5.90528	4.97392	4.70305	5.24902	5.14756	4.79028	5.36977	4.82541	4.41373	5.69556	4.47015	5.44466	5.01165	5.12904	4.47794	4.71001	5.54206	4.97533	5.10254	4.97823
A0A0H3BYT8	23	22	300.629	1.89306e-06	1.58612	32939	Hypersensitive-induced response protein-like protein OS=Streptococcus pyogenes serotype M49 (strain NZ131) OX=471876 GN=Spy49_1555c PE=4 SV=1	13.0385	15.0872	12.6784	16.1093	18.3998	15.5498	16.2836	17.3131	15.728	17.3223	19.0345	16.0405	12.5792	13.5873	12.1472	10.8371	11.7525	10.4452	13.8901	16.6744	13.836	13.8827	14.9669	13.4966	16.0955	17.1393	15.0424	16.6715	17.7302	16.9615	13.6014	16.6863	16.4415	17.4657	12.7712	11.0116	14.8002	14.1154	16.0924	17.1211
A0A0H3C2T5	5	5	49.2967	0.00979084	1.40574	31652.6	Hypothetical membrane spanning protein OS=Streptococcus pyogenes serotype M49 (strain NZ131) OX=471876 GN=Spy49_1814 PE=4 SV=1	1.30242	1.2483	1.39093	1.19109	1.08833	1.22136	1.11219	1.04457	1.25446	1.02415	0.890258	1.05935	1.3022	1.12596	1.36539	1.10628	0.977958	1.14607	1.29333	1.19617	1.5215	1.35195	1.12383	1.43232	1.22312	1.13114	1.39103	1.38862	1.24371	1.54801	1.31388	1.16693	1.13708	0.991254	1.26452	1.07677	1.337	1.3027	1.24843	1.39345
A0A0H3BXN8	8	8	68.8399	6.66134e-16	2.2059	26838.1	Hypothetical phage associated protein SpyM3_0964 OS=Streptococcus pyogenes serotype M49 (strain NZ131) OX=471876 GN=Spy49_0369 PE=4 SV=1	1.18055	1.2363	1.19004	1.08135	1.19254	1.01438	1.06374	1.0694	0.97439	0.953437	0.980458	0.881224	1.34829	1.32321	1.25182	1.70834	1.72157	1.70981	2.02671	2.09357	2.08959	1.13179	1.08575	1.11837	1.12146	1.14598	1.10064	1.18159	1.16808	1.1576	1.2023	1.09609	1.03584	0.938373	1.30777	1.71324	2.06996	1.11197	1.12269	1.16909
A0A0H3BVB9	15	12	173.732	1.06881e-12	2.43853	20782	Hypoxanthine phosphoribosyltransferase OS=Streptococcus pyogenes serotype M49 (strain NZ131) OX=471876 GN=hpt PE=3 SV=1	4.52394	4.32932	4.85046	5.2704	5.00523	5.84424	4.09669	4.02808	4.71379	3.82045	3.8829	4.33678	5.36592	5.28256	5.52806	8.87523	7.95135	9.17429	9.64682	9.37383	10.3396	4.70417	4.28947	4.72143	4.57811	3.94845	4.66684	4.56574	4.08234	4.58779	4.56791	5.37329	4.27952	4.01338	5.39218	8.66696	9.78674	4.57169	4.3978	4.41196
B5XIX5	17	14	233.124	0	19.2133	46319.3	Imidazolonepropionase OS=Streptococcus pyogenes serotype M49 (strain NZ131) OX=471876 GN=hutI PE=3 SV=1	0.941385	0.834783	0.818058	0.894033	0.998715	0.964573	0.980587	0.97821	0.889804	13.3518	13.4014	13.5892	1.24282	1.18067	1.17729	0.699456	0.702276	0.697978	0.817873	0.792973	1.05333	1.37478	1.3664	1.32744	1.07102	1.09879	1.07387	1.40813	1.31195	1.31263	0.864742	0.95244	0.949534	13.4475	1.20026	0.699904	0.888059	1.35621	1.08123	1.34424
A0A0H3BZG1	7	7	51.8085	0	13.7583	54615.6	Immunogenic secreted protein OS=Streptococcus pyogenes serotype M49 (strain NZ131) OX=471876 GN=isp2 PE=4 SV=1	0.563628	0.588648	0.540218	0.63838	0.722467	0.607445	0.558784	0.527493	0.536831	0.244883	0.233983	0.242232	0.680104	0.567702	0.53761	0.843572	0.812947	0.719337	3.31145	3.44148	3.16816	0.500909	0.481964	0.500525	0.469819	0.432515	0.438663	0.461051	0.425262	0.437207	0.564165	0.656098	0.541036	0.240366	0.595139	0.791952	3.30703	0.494466	0.446999	0.441174
A0A0H3C114	45	37	672.358	0.608069	1.30324	52864.4	Inosine-5'-monophosphate dehydrogenase OS=Streptococcus pyogenes serotype M49 (strain NZ131) OX=471876 GN=guaB PE=3 SV=1	47.1794	53.9701	40.9751	41.6024	52.7446	35.6227	43.9252	51.4642	36.6888	43.1507	47.9346	36.5585	42.3403	47.6185	36.4436	36.5298	43.0074	31.9284	40.7064	49.4723	35.3086	42.2661	48.6056	39.3293	44.3395	51.3884	41.2047	47.0895	53.5054	44.6715	47.3749	43.3232	44.0261	42.5479	42.1342	37.1552	41.8291	43.4003	45.6442	48.4222
A0A0H3BYR3	3	3	18.5009	2.01299e-10	76.736	38737.5	Iron ABC transporter_ iron-binding protein OS=Streptococcus pyogenes serotype M49 (strain NZ131) OX=471876 GN=Spy49_0840 PE=4 SV=1	0.129526	0.105355	0.146856	0.0717369	0.0589775	0.104646	0.181256	0.179378	0.229162	0.0707791	0.0618768	0.0872762	0.127127	0.127057	0.171417	0.141688	0.149747	0.18022	0.00250987	0.00125767	0.0039185	0.118363	0.10791	0.132827	0.0654953	0.0643279	0.0685098	0.0159907	0.0150423	0.0211418	0.127246	0.0784533	0.196599	0.0733107	0.141867	0.157219	0.00256202	0.1197	0.066111	0.0173916
A0A0H3BZ29	22	18	234.247	0.0719648	1.39431	28110.5	Iron-sulfur cluster assembly ATPase protein SufC OS=Streptococcus pyogenes serotype M49 (strain NZ131) OX=471876 GN=Spy49_0242 PE=3 SV=1	8.40094	9.60895	8.26609	9.51983	11.8803	10.3625	8.25456	10.4566	8.50227	7.1974	8.12236	7.46041	7.35025	9.33092	8.20312	8.04085	10.2648	8.26829	7.94654	9.02672	7.05877	8.67856	10.1166	8.19354	8.32657	10.24	8.23696	9.26497	10.3562	9.17231	8.75866	10.5875	9.07115	7.59339	8.29476	8.85797	8.01068	8.99622	8.93449	9.59784
A0A0H3BYP1	22	20	185.473	0.0171821	1.54151	52924.6	Iron-sulfur cluster assembly protein SufB OS=Streptococcus pyogenes serotype M49 (strain NZ131) OX=471876 GN=Spy49_0246 PE=3 SV=1	1.71746	1.81906	1.44114	1.79832	2.16397	1.58631	1.5639	1.57403	1.25621	1.50937	1.52971	1.12819	1.42034	1.50282	1.1847	1.66032	1.8052	1.38988	2.2244	2.31404	1.79387	1.63032	1.84206	1.4477	1.78659	1.99725	1.58089	1.56885	1.79767	1.46423	1.65922	1.84953	1.46471	1.38909	1.36929	1.61847	2.11077	1.64003	1.78824	1.61025
A0A0H3BVR5	18	13	167.284	0.174811	1.35166	46027.2	Iron-sulfur cluster assembly protein SufD OS=Streptococcus pyogenes serotype M49 (strain NZ131) OX=471876 GN=Spy49_0243 PE=3 SV=1	2.93876	3.14981	2.45593	2.90936	3.40731	2.39811	2.86265	3.32231	2.43004	2.70264	2.76326	2.24641	2.8025	3.09437	2.48036	3.36648	3.94052	2.87911	3.44588	3.99095	2.98761	2.57551	3.14224	2.44675	2.59667	2.93978	2.46687	2.72142	2.99956	2.48206	2.84817	2.90493	2.87167	2.57077	2.79241	3.39537	3.47481	2.7215	2.66777	2.73435
A0A0H3BXE3	2	2	20.3263	2.99205e-12	2.37719	17313.6	Iron-sulfur cluster assembly scaffold protein IscU OS=Streptococcus pyogenes serotype M49 (strain NZ131) OX=471876 GN=Spy49_0245 PE=4 SV=1	0.621775	0.589374	0.544009	0.517864	0.513581	0.436137	0.516449	0.542199	0.508251	0.485023	0.429165	0.466894	0.654576	0.657083	0.583579	0.934906	0.917464	0.871983	0.538841	0.574157	0.485452	0.497368	0.526135	0.469402	0.385571	0.407178	0.353291	0.393711	0.397417	0.392668	0.585052	0.489194	0.5223	0.46036	0.631746	0.908118	0.532817	0.497635	0.382013	0.394599
A0A0H3BXY9	50	42	589.844	9.10474e-08	1.80512	103551	Isoleucine--tRNA ligase OS=Streptococcus pyogenes serotype M49 (strain NZ131) OX=471876 GN=ileS PE=3 SV=1	9.50345	11.1827	9.55412	8.16671	9.80689	10.4665	8.82362	9.45421	10.3873	7.61847	8.42118	9.20711	9.3237	10.2424	10.107	13.2327	14.5743	14.4384	14.7378	16.9536	13.882	8.85763	9.59495	9.55737	9.49136	9.35116	9.18457	9.05821	9.87382	9.29928	10.0801	9.48002	9.55504	8.41559	9.89103	14.0818	15.1912	9.33665	9.34236	9.41044
A0A0H3BWT3	4	4	25.2906	6.3197e-06	1.39742	36891.3	Isopentenyl-diphosphate delta-isomerase OS=Streptococcus pyogenes serotype M49 (strain NZ131) OX=471876 GN=fni PE=3 SV=1	0.603581	0.801866	0.713134	0.689472	0.766026	0.768394	0.826191	0.913309	0.790662	0.854812	0.986304	0.948939	0.750114	0.759623	0.760528	0.882998	0.976692	1.00397	0.943834	0.976321	0.995808	0.673724	0.685027	0.727918	0.700838	0.76692	0.816153	0.662461	0.75622	0.710899	0.706194	0.741297	0.843387	0.930018	0.756755	0.954553	0.971988	0.695556	0.761304	0.70986
A0A0H3BZY6	2	2	22.0044	0.933865	1.1372	28256.8	Isoprenyl transferase OS=Streptococcus pyogenes serotype M49 (strain NZ131) OX=471876 GN=uppS PE=3 SV=1	1.4786	1.58272	1.29396	1.31882	1.53865	1.13842	1.45235	1.79952	1.20447	1.52993	1.72047	1.208	1.46315	1.71415	1.27092	1.35379	1.58734	1.15015	1.45099	1.79671	1.2797	1.27873	1.52489	1.18989	1.31737	1.48094	1.18286	1.28899	1.47766	1.31581	1.45176	1.33196	1.48545	1.48613	1.48274	1.36376	1.50913	1.33117	1.32706	1.36082
A0A0H3BVM6	13	12	127.27	9.94683e-09	1.8632	28777.6	Lactamase_B domain-containing protein OS=Streptococcus pyogenes serotype M49 (strain NZ131) OX=471876 GN=Spy49_0184 PE=4 SV=1	2.87727	3.17037	3.11143	3.69314	4.30133	4.23133	3.29162	3.3166	3.72865	2.68524	2.75053	3.15046	3.32093	3.36744	3.49326	4.00048	3.87611	4.56744	4.96016	5.33048	5.70719	3.30558	3.19442	3.59219	3.64648	3.74882	3.78653	3.6507	3.64277	3.4698	3.05302	4.07527	3.44562	2.86208	3.39388	4.14801	5.33261	3.36406	3.72728	3.58776
A0A0H3BZ96	23	18	236.809	0	12.4719	42656.1	Lactate oxidase OS=Streptococcus pyogenes serotype M49 (strain NZ131) OX=471876 GN=lctO PE=3 SV=1	1.93932	2.09758	1.78524	0.629961	0.655867	0.580212	3.55483	3.84723	3.31718	7.9585	8.15219	7.16237	6.4301	6.64376	6.13633	2.7069	2.97419	2.34937	0.657651	0.717414	0.594276	7.53967	8.12895	7.35669	1.39217	1.45793	1.31091	1.59947	1.6708	1.62723	1.94071	0.622013	3.57308	7.75769	6.4034	2.67682	0.656447	7.6751	1.387	1.6325
A0A0H3BZV7	5	5	38.6455	5.33551e-12	3.04824	29169.1	Lactose phosphotransferase system repressor OS=Streptococcus pyogenes serotype M49 (strain NZ131) OX=471876 GN=lacR1 PE=4 SV=1	1.41536	1.59402	1.46542	1.13536	1.35897	1.31372	1.49378	1.65884	1.64135	2.47941	2.58432	2.69461	1.22163	1.49009	1.47892	0.803189	0.879871	0.862121	1.85941	2.02661	1.99977	1.50604	1.41718	1.45351	1.36574	1.5447	1.36531	1.5517	1.79582	1.58947	1.4916	1.26935	1.59799	2.58611	1.39688	0.848394	1.96193	1.45891	1.42525	1.64566
A0A0H3BYW6	10	9	80.6994	1.62226e-12	3.72067	28994.3	Lactose phosphotransferase system repressor OS=Streptococcus pyogenes serotype M49 (strain NZ131) OX=471876 GN=lacR2 PE=4 SV=1	1.62785	1.89766	1.44186	0.960237	1.16023	0.979065	1.91092	2.16427	1.86646	2.64512	2.91255	2.68835	1.4778	1.63349	1.43836	0.698778	0.818471	0.702256	0.680142	0.900793	0.635335	1.38697	1.46907	1.34463	0.982255	1.15446	1.05799	1.35779	1.51032	1.31702	1.65579	1.03318	1.98055	2.74867	1.51655	0.739835	0.738757	1.40022	1.0649	1.39504
A0A0H3BZ32	9	7	98.9178	1.99217e-11	2.93413	14498.1	Lactoylglutathione lyase OS=Streptococcus pyogenes serotype M49 (strain NZ131) OX=471876 GN=gloA PE=4 SV=1	2.16949	2.27918	2.07742	3.29102	3.79915	3.06948	2.96152	3.48682	2.68657	4.05763	4.16739	3.55914	2.49619	2.59517	2.33646	2.1607	2.32833	1.99318	1.59111	1.94743	1.67239	2.72804	2.89471	2.6472	3.28126	3.77979	3.26462	5.00048	5.15769	5.13142	2.17536	3.38655	3.04497	3.92805	2.47594	2.16074	1.73698	2.75665	3.44189	5.09653
A0A0H3BZ34	3	3	20.0022	1.16291e-11	25.459	34225.3	Laminin-binding surface protein OS=Streptococcus pyogenes serotype M49 (strain NZ131) OX=471876 GN=lmb PE=3 SV=1	0.0153311	0.00906761	0.0241663	0.0127415	0.0118937	0.0194995	0.0156951	0.0175856	0.0210965	0.0273736	0.0248967	0.0347653	0.0300153	0.0259398	0.0462141	0.352708	0.306239	0.464675	0.271934	0.240055	0.373588	0.0219797	0.0159094	0.0244207	0.0180584	0.0123282	0.0230805	0.0167734	0.0215653	0.0269077	0.0161883	0.0147115	0.0181257	0.0290119	0.0340564	0.37454	0.295192	0.02077	0.0178224	0.0217488
A0A0H3BXP4	5	5	83.8308	0.0455015	1.83577	12960.4	Large-conductance mechanosensitive channel OS=Streptococcus pyogenes serotype M49 (strain NZ131) OX=471876 GN=mscL PE=3 SV=1	29.0922	27.4081	38.2891	45.178	41.3856	59.3271	36.7094	33.6273	51.9698	42.3669	36.1172	54.9919	42.4559	34.8366	47.9086	37.2785	33.3522	44.6594	56.4064	52.9718	64.6338	43.9679	33.9367	45.2994	43.3674	35.6928	49.8759	41.4351	33.7206	46.8712	31.5965	48.6302	40.7688	44.492	41.7337	38.43	58.004	41.068	42.9787	40.6756
B5XJI9	40	31	474.666	4.09107e-06	1.51362	93849	Leucine--tRNA ligase OS=Streptococcus pyogenes serotype M49 (strain NZ131) OX=471876 GN=leuS PE=3 SV=1	7.12064	8.04518	7.17797	8.32305	10.244	8.79785	7.70316	8.55255	8.08737	7.60227	8.0758	7.54898	8.01525	8.62481	8.02821	8.19202	9.12879	8.17932	6.88572	8.16396	6.87053	7.95714	8.38021	7.92711	8.71797	9.50753	9.09167	10.9765	11.2799	10.9224	7.44793	9.12163	8.11436	7.74235	8.22276	8.50004	7.30674	8.08815	9.10572	11.0596
A0A0H3BXX9	2	2	13.7126	0.000182632	1.46564	31970.9	Lipase/acylhydrolase OS=Streptococcus pyogenes serotype M49 (strain NZ131) OX=471876 GN=Spy49_1149c PE=4 SV=1	0.465995	0.448855	0.378338	0.386885	0.477048	0.414828	0.507089	0.591857	0.517172	0.487419	0.591764	0.486325	0.419487	0.451639	0.434185	0.486745	0.530932	0.506714	0.42702	0.444099	0.400908	0.390623	0.415127	0.36279	0.406742	0.369548	0.326384	0.469769	0.523185	0.461846	0.431063	0.426254	0.538706	0.521836	0.435104	0.50813	0.424009	0.389513	0.367558	0.484933
A0A0H3BZY4	9	9	90.7103	0.00329339	1.56405	29658.2	Lipid II isoglutaminyl synthase (glutamine-hydrolyzing) subunit GatD OS=Streptococcus pyogenes serotype M49 (strain NZ131) OX=471876 GN=cobQ PE=3 SV=1	1.75514	2.06901	1.637	1.65344	1.86311	1.63255	1.63864	1.57543	1.62835	1.56891	1.59825	1.40905	1.63287	1.83686	1.6513	1.67082	2.22063	1.67826	1.7913	2.03718	1.64711	1.58808	1.9451	1.54491	1.50593	1.7866	1.35159	1.11697	1.31106	1.13306	1.82038	1.71637	1.61414	1.5254	1.70701	1.85657	1.8252	1.6927	1.54804	1.18703
A0A0H3C0E0	13	11	116.618	9.39007e-10	1.92131	49900.2	Lipid II isoglutaminyl synthase (glutamine-hydrolyzing) subunit MurT OS=Streptococcus pyogenes serotype M49 (strain NZ131) OX=471876 GN=murC2 PE=3 SV=1	1.28116	1.71167	1.37285	1.26512	1.55893	1.4661	1.5227	1.57851	1.53188	1.30475	1.35432	1.43778	1.58049	1.54991	1.49019	1.89775	2.02892	1.89797	2.15824	2.14695	2.13435	1.31685	1.23622	1.25438	1.19585	1.13442	1.07922	1.0652	1.15663	1.12981	1.45523	1.43005	1.54436	1.36562	1.54019	1.94155	2.14651	1.26915	1.1365	1.11721
A0A0H3BZ01	12	7	127.123	1.66314e-09	1.89948	38520.7	Lipoate--protein ligase OS=Streptococcus pyogenes serotype M49 (strain NZ131) OX=471876 GN=lplA PE=4 SV=1	2.91585	3.20523	3.25565	2.79689	3.20121	3.30299	4.0195	4.11132	4.60142	4.94657	4.69652	5.8822	3.90392	3.88041	4.07598	3.65113	3.56335	3.91729	3.56875	3.53505	3.98025	3.39388	3.19486	3.50892	2.7202	2.73704	2.71621	2.77128	2.67298	2.83737	3.12558	3.10036	4.24408	5.1751	3.95344	3.71059	3.69468	3.36589	2.72448	2.76054
A0A0H3BYN8	21	19	289.055	0.000425635	1.43983	37677.8	Lipoate--protein ligase OS=Streptococcus pyogenes serotype M49 (strain NZ131) OX=471876 GN=Spy49_0812 PE=4 SV=1	6.84339	7.24038	8.06302	7.46225	7.44803	8.1012	6.13495	6.2148	7.086	7.97378	7.24846	8.25714	7.63747	6.89549	8.26837	6.72613	6.76541	7.42592	7.28038	6.55042	8.48233	8.44737	8.38334	9.05676	8.20283	8.39548	9.02085	9.32819	8.6582	9.99771	7.38226	7.6705	6.47858	7.82646	7.60044	6.97249	7.43771	8.62915	8.53972	9.32803
A0A0H3BWU2	16	15	188.546	4.62854e-09	1.94365	31167.2	Lipoprotein OS=Streptococcus pyogenes serotype M49 (strain NZ131) OX=471876 GN=atmB PE=3 SV=1	1.83864	1.89547	1.99416	1.99658	2.2915	2.56921	1.89686	1.97653	2.31769	1.86359	1.75385	2.07407	1.95045	2.08029	2.16299	2.6252	2.55026	2.87088	3.5992	3.72247	3.74061	2.0248	2.00627	2.11791	2.09885	2.15967	2.33672	2.1537	2.15365	2.33589	1.90942	2.28576	2.0637	1.89717	2.06457	2.68211	3.68743	2.04966	2.19841	2.21441
B5XLJ8	25	23	351.538	0.0316713	1.27796	35386.1	L-lactate dehydrogenase OS=Streptococcus pyogenes serotype M49 (strain NZ131) OX=471876 GN=ldh PE=3 SV=1	63.6455	62.648	69.2499	61.9226	58.3955	66.6682	59.2454	58.2938	65.1989	60.117	56.0223	63.4038	67.6687	61.0719	68.9327	64.3999	56.8494	67.7812	56.6375	52.0214	63.3548	70.2483	61.1204	72.6488	72.0525	62.8096	76.1121	74.9436	66.0036	78.879	65.1811	62.3287	60.9127	59.8477	65.8911	63.0101	57.3379	68.0058	70.3247	73.2754
A0A0H3BYI6	34	30	384.647	2.38198e-12	1.93204	44382.4	L-proline Glycine Betaine ABC transport ATP-binding protein proV OS=Streptococcus pyogenes serotype M49 (strain NZ131) OX=471876 GN=opuAA PE=3 SV=1	6.66666	7.23434	7.12791	11.9024	12.545	13.1655	12.5154	12.3002	13.8888	9.72259	9.40081	10.9102	6.72345	6.36385	6.94559	6.83834	6.56434	6.85828	7.02821	7.8057	7.66618	8.24486	7.94844	8.21124	9.64119	9.05041	10.5942	8.51063	8.25279	9.20803	7.00964	12.5376	12.9015	10.0112	6.67763	6.75365	7.50003	8.13485	9.76195	8.65715
A0A0H3C0K5	9	9	87.3793	2.58432e-08	1.84262	27354.6	L-proline Glycine Betaine ABC transport ATP-binding protein proV OS=Streptococcus pyogenes serotype M49 (strain NZ131) OX=471876 GN=proV PE=4 SV=1	1.22426	1.33348	1.24809	1.2183	1.49313	1.15877	1.78225	2.04584	1.67287	1.84957	1.91838	1.80718	1.4736	1.64126	1.41871	1.42313	1.59319	1.35632	1.05304	1.13887	0.939553	1.12195	1.22986	1.08285	0.940405	1.12372	0.961529	1.12238	1.19282	1.19088	1.26861	1.29007	1.83365	1.85837	1.51119	1.45755	1.04382	1.14488	1.00855	1.1687
A0A0H3BYX3	17	15	173.594	1.53808e-05	1.40884	63144.6	L-proline Glycine Betaine ABC transport system permease protein proW OS=Streptococcus pyogenes serotype M49 (strain NZ131) OX=471876 GN=opuABC PE=3 SV=1	7.33538	6.73303	7.53665	9.66464	8.87757	9.95306	9.87881	9.06783	10.815	7.91117	7.04971	8.39651	7.37031	6.69273	7.06192	7.97806	7.3319	7.75065	7.72034	7.42585	8.03666	8.31311	7.87245	8.59829	8.7821	7.94189	8.97754	7.98384	7.16517	8.01141	7.20169	9.49842	9.92055	7.78579	7.04166	7.68687	7.72762	8.26128	8.56718	7.72014
A0A0H3BX92	6	6	39.1421	0	3.71424	55555.2	L-proline glycine betaine binding ABC transporter protein proX / Osmotic adaptation OS=Streptococcus pyogenes serotype M49 (strain NZ131) OX=471876 GN=proX PE=3 SV=1	0.434706	0.457833	0.486947	0.544354	0.549967	0.550562	0.678559	0.666202	0.696485	0.523112	0.485471	0.52612	0.52412	0.529175	0.539504	0.553931	0.54298	0.57394	0.255545	0.243735	0.24992	0.468523	0.43639	0.4574	0.400567	0.385033	0.40859	0.187536	0.181363	0.180674	0.459829	0.548294	0.680415	0.511568	0.530933	0.556951	0.249733	0.454104	0.398063	0.183191
A0A0H3BVK4	2	2	13.7511	0	9.9703	26358.8	L-ribulose-5-phosphate 4-epimerase OS=Streptococcus pyogenes serotype M49 (strain NZ131) OX=471876 GN=araD PE=4 SV=1	0.0799713	0.0934793	0.100438	0.0530072	0.0510726	0.0842162	0.178103	0.183712	0.240744	0.607108	0.577704	0.639757	0.146579	0.156661	0.18465	0.0715959	0.0770186	0.0709072	0.0964004	0.0927907	0.0918062	0.157296	0.143996	0.157424	0.0598511	0.0594759	0.0636736	0.0717525	0.109739	0.0957386	0.0912963	0.0627653	0.200853	0.60819	0.16263	0.0731739	0.0936657	0.152905	0.0610002	0.0924101
A0A0H3C228	18	16	186.758	1.06659e-12	2.57142	30269.6	L-serine dehydratase OS=Streptococcus pyogenes serotype M49 (strain NZ131) OX=471876 GN=sdhA PE=3 SV=1	4.1855	4.51995	4.20199	3.45912	3.78263	3.57313	4.35256	4.58547	4.14685	9.36804	10.2297	8.21185	4.45182	4.91617	4.20833	5.06539	5.19444	4.75218	6.10305	6.14068	5.91331	5.06258	5.06843	4.95695	4.22599	4.13976	4.02631	3.61974	4.24497	3.7107	4.30248	3.60496	4.36163	9.26987	4.52544	5.004	6.05235	5.02932	4.13069	3.85847
A0A0H3C0Z8	8	6	90.5109	6.46838e-12	3.85574	24180.6	L-serine dehydratase OS=Streptococcus pyogenes serotype M49 (strain NZ131) OX=471876 GN=sdhB PE=3 SV=1	3.02617	3.45112	2.83018	1.88799	2.20581	1.7759	2.99012	3.05037	2.58627	7.72418	7.94512	6.96275	3.55757	3.77261	3.12108	3.25496	3.59551	2.97745	3.72309	4.19701	3.55447	3.38056	3.57033	3.18699	2.41791	2.62026	2.34343	2.66763	2.96523	2.50609	3.10249	1.95657	2.87559	7.54402	3.48375	3.27597	3.82486	3.37929	2.46054	2.71298
A0A0H3BYB7	11	9	154.09	3.18234e-11	1.72936	8761.31	LSU ribosomal protein L23p (L23Ae) OS=Streptococcus pyogenes serotype M49 (strain NZ131) OX=471876 GN=rplW PE=3 SV=1	35.487	38.9972	36.6809	32.7156	35.3148	35.3008	31.4559	32.4004	33.7595	31.1465	32.9992	31.3171	32.5323	33.7884	32.9808	38.3594	35.5683	38.1749	46.0515	45.2155	49.7401	35.4189	34.3329	36.4517	34.0155	32.3522	33.5749	27.3401	26.421	27.7761	37.055	34.4438	32.5386	31.8209	33.1005	37.3675	47.0024	35.4012	33.3142	27.1791
A0A0H3C010	7	7	87.1205	0.000138632	1.51257	6347.38	LSU ribosomal protein L7/L12 (L23e) OS=Streptococcus pyogenes serotype M49 (strain NZ131) OX=471876 GN=rplL PE=4 SV=1	143.799	132.753	153.167	126.923	120.222	134.609	123.968	114.704	134.458	108.665	98.5159	116.425	133.22	118.632	135.577	148.941	132.812	158.992	160.325	147.251	181.898	144.166	133.855	149.668	132.973	123.219	138.304	126.722	119.941	128.495	143.24	127.251	124.376	107.868	129.143	146.915	163.158	142.563	131.499	125.053
B5XKG9	33	28	372.552	0.868885	1.27699	56674.6	Lysine--tRNA ligase OS=Streptococcus pyogenes serotype M49 (strain NZ131) OX=471876 GN=lysS PE=3 SV=1	11.2155	10.5688	13.995	11.6158	10.3486	13.3256	11.0988	10.6029	15.2694	11.2371	9.84549	13.003	12.5214	9.82964	14.3897	12.5015	9.72041	14.5806	9.72776	9.18306	12.2911	13.5427	11.2562	15.0458	12.594	10.6369	14.5218	12.5057	10.4079	12.6693	11.9265	11.7633	12.3237	11.3619	12.2469	12.2675	10.4006	13.2816	12.5842	11.861
A0A0H3C0S4	6	6	76.5391	1.11022e-16	8.21479	7616.54	Major cold shock protein OS=Streptococcus pyogenes serotype M49 (strain NZ131) OX=471876 GN=csp PE=4 SV=1	7.02906	7.60598	8.53047	16.8891	16.9564	19.72	9.12063	8.71702	10.4011	5.88724	6.47551	5.76366	15.4933	15.2937	16.9687	28.0008	25.4323	30.439	23.2075	19.4311	27.0067	7.80722	7.0408	8.70809	4.76794	4.40665	5.00136	3.20694	3.58542	3.41752	7.72184	17.8552	9.41292	6.04214	15.9185	27.9573	23.2151	7.85204	4.72531	3.40329
A0A0H3C1R5	20	18	235.041	1.11022e-16	7.44974	34332.6	Malonyl CoA-acyl carrier protein transacylase OS=Streptococcus pyogenes serotype M49 (strain NZ131) OX=471876 GN=fabD PE=3 SV=1	8.20588	8.33104	8.67217	2.68848	2.47467	3.06816	6.95269	5.70102	6.98662	7.30346	6.14151	7.57182	11.1615	10.4131	12.4025	20.0403	19.3716	21.9092	16.6696	15.7688	17.4295	6.66497	6.58471	6.92741	4.51024	3.92675	4.51556	5.19077	4.89817	5.69715	8.40303	2.74377	6.54678	7.0056	11.3257	20.4404	16.6226	6.7257	4.31751	5.26203
A0A0H3BYN5	41	34	527.33	1.0425e-13	2.98458	44557.2	Maltose maltodextrin ABC transporter_ substrate binding periplasmic protein malE OS=Streptococcus pyogenes serotype M49 (strain NZ131) OX=471876 GN=malE PE=4 SV=1	31.339	23.4687	30.2049	9.04564	8.79428	11.2085	26.7563	26.8068	30.9138	25.6982	24.2114	29.9349	28.5278	28.6964	29.4732	20.0379	18.4774	20.1341	26.0585	25.5344	26.8809	23.0202	21.2394	24.6656	10.3591	9.91425	10.8185	11.8783	11.2127	12.2887	28.3375	9.6828	28.159	26.6148	28.8991	19.5498	26.158	22.9751	10.3639	11.7933
A0A0H3BZ67	5	4	44.8914	1.05468e-09	2.61311	50612.2	Maltose transport system permease protein malF OS=Streptococcus pyogenes serotype M49 (strain NZ131) OX=471876 GN=malF PE=3 SV=1	0.800328	0.746757	0.836283	0.308302	0.303268	0.377862	0.778512	0.723319	0.935968	0.659574	0.600075	0.778781	0.847454	0.785453	0.952586	0.636853	0.593647	0.694963	0.742349	0.774134	0.884222	0.608332	0.54965	0.648704	0.3269	0.336437	0.420371	0.414882	0.364973	0.417634	0.794456	0.329811	0.8126	0.679477	0.861831	0.641821	0.800235	0.602229	0.361236	0.399163
A0A0H3C017	17	15	164.697	0.000442197	1.29381	35672.5	Mannose-6-phosphate isomerase OS=Streptococcus pyogenes serotype M49 (strain NZ131) OX=471876 GN=pmi PE=3 SV=1	5.47244	6.62857	6.00262	6.74017	8.51918	7.01598	7.51354	8.33849	7.32367	7.25767	7.78455	7.31502	6.47328	6.73827	5.82473	6.48911	6.74993	6.41606	6.51146	7.49644	6.2874	6.25486	6.09874	6.05564	7.16784	7.95028	7.52781	7.62431	7.81287	7.98553	6.03454	7.42511	7.72523	7.45241	6.34543	6.5517	6.7651	6.13641	7.54864	7.80757
A0A0H3BZ68	11	10	101.716	4.90949e-08	1.55903	34654	Membrane protein insertase YidC OS=Streptococcus pyogenes serotype M49 (strain NZ131) OX=471876 GN=oxaA PE=3 SV=1	7.77171	8.24643	7.78256	7.76109	8.81718	9.24289	8.58088	8.89261	8.82214	8.95579	9.42594	8.84214	10.0664	10.739	10.4292	9.27819	9.5985	10.2411	10.096	10.6347	12.5073	8.15202	7.81279	8.31672	6.91989	7.29559	7.10418	7.22371	7.81044	6.98875	7.93357	8.60705	8.76521	9.07462	10.4115	9.70593	11.0794	8.09385	7.10655	7.34097
A0A0H3BYL6	3	3	22.8633	0.0044054	1.30656	30986.3	Membrane protein insertase YidC OS=Streptococcus pyogenes serotype M49 (strain NZ131) OX=471876 GN=yidC PE=3 SV=1	1.69054	2.05624	1.72569	1.55942	1.94941	1.90694	2.18551	2.31667	2.17491	2.17092	2.28764	2.45703	2.01437	2.45956	2.0299	2.27796	2.08285	2.25167	2.07504	2.09443	2.78445	1.68943	1.85398	1.85763	1.70746	1.89678	1.71808	2.05657	2.19741	1.83559	1.82416	1.80526	2.2257	2.30519	2.16794	2.20416	2.31797	1.80035	1.7741	2.02986
A0A0H3BY21	5	5	40.8757	1.00006e-05	1.49874	44247.4	Membrane protein_ putative OS=Streptococcus pyogenes serotype M49 (strain NZ131) OX=471876 GN=Spy49_0794 PE=3 SV=1	1.19526	1.29711	1.20962	1.17658	1.47702	1.23011	1.42859	1.34668	1.38631	1.27606	1.31982	1.34766	1.17535	1.29786	1.24049	1.7524	1.51104	1.39573	1.62383	1.85635	1.66829	1.26207	1.21587	1.1661	1.2489	1.25427	1.19735	1.12389	1.22524	1.08608	1.23399	1.29457	1.38719	1.31451	1.2379	1.55306	1.71616	1.21468	1.23351	1.14507
A0A0H3BYZ6	22	19	280.514	1.31324e-06	1.60536	30661.9	Metal ABC transporter substrate-binding lipoprotein OS=Streptococcus pyogenes serotype M49 (strain NZ131) OX=471876 GN=mtsA PE=3 SV=1	23.466	23.4336	25.7403	21.8108	22.1438	24.0454	24.3829	22.9776	26.9417	29.6036	30.5672	34.3696	25.1555	22.4002	25.51	19.8947	18.9614	20.0346	25.0531	23.5165	25.6771	25.2088	23.8988	26.1488	21.7019	20.3211	21.8772	23.8403	22.326	25.4125	24.2133	22.6667	24.7674	31.5135	24.3552	19.6302	24.7489	25.0855	21.3001	23.8596
A0A0H3C0I1	18	13	207.921	0.05665	1.6689	31904.3	Methionine aminopeptidase OS=Streptococcus pyogenes serotype M49 (strain NZ131) OX=471876 GN=map PE=3 SV=1	6.72448	6.00039	8.44969	7.21002	6.11183	8.9836	6.95608	5.98831	8.81222	7.67658	6.39318	10.1317	7.84356	6.8442	9.66217	10.6402	8.38168	11.859	11.3542	9.64024	14.3438	8.90099	7.04369	9.07494	8.39724	6.38285	8.50565	8.95556	7.18343	9.97688	7.05819	7.43515	7.2522	8.06715	8.11664	10.2936	11.7794	8.33987	7.76191	8.70529
A0A0H3BXF9	16	12	136.983	2.07556e-06	1.95216	38979.9	Methionine import ATP-binding protein MetN OS=Streptococcus pyogenes serotype M49 (strain NZ131) OX=471876 GN=atmD PE=3 SV=1	2.24185	2.20155	2.60835	2.14919	2.01817	2.46006	2.02717	1.85145	2.40956	1.9488	1.77983	2.35503	2.27647	2.09457	2.54878	3.41181	2.82779	3.53155	3.97993	3.36095	4.36076	2.44783	2.09304	2.5284	2.24317	1.96057	2.25221	1.92627	1.93785	2.13009	2.35058	2.20914	2.09606	2.02789	2.3066	3.25705	3.90055	2.35642	2.15198	1.99807
A0A0H3BXK7	40	31	368.552	1.53606e-11	1.50698	75092.9	Methionine--tRNA ligase OS=Streptococcus pyogenes serotype M49 (strain NZ131) OX=471876 GN=metS PE=3 SV=1	4.72477	5.02594	4.87171	4.66399	4.84387	4.91051	4.35064	4.52868	4.63772	3.91574	4.01048	4.10894	4.85342	4.69746	4.60701	5.73053	5.83695	5.53169	5.92351	6.39272	5.82052	4.63199	4.68529	4.61351	4.74912	4.63028	4.69972	4.79807	4.69134	4.98768	4.87414	4.80613	4.50568	4.01172	4.7193	5.69972	6.04558	4.6436	4.69304	4.8257
B5XMI3	12	11	140.424	0.198637	1.30749	33684.3	Methionyl-tRNA formyltransferase OS=Streptococcus pyogenes serotype M49 (strain NZ131) OX=471876 GN=fmt PE=3 SV=1	8.68664	9.69055	8.10659	8.60019	10.5851	7.27009	7.93804	9.37998	6.44596	8.59381	8.88057	7.37405	7.55566	8.49585	6.85554	7.67558	8.446	7.01612	7.25433	8.18739	7.06185	8.54823	8.94866	7.78289	8.44066	9.96895	7.93388	9.52324	10.4644	9.4356	8.82793	8.81845	7.92133	8.28281	7.63568	7.71256	7.50119	8.42659	8.78116	9.80774
A0A0H3BXC2	23	20	222.316	3.50318e-05	1.66197	49721.5	Methylenetetrahydrofolate--tRNA-(uracil-5-)-methyltransferase TrmFO OS=Streptococcus pyogenes serotype M49 (strain NZ131) OX=471876 GN=gid PE=3 SV=1	3.70744	4.19684	3.43456	4.18172	4.95986	4.20424	4.40453	4.89579	4.16337	4.1544	4.32579	4.02098	4.02742	4.60593	3.87952	3.50704	4.09628	3.48154	2.72679	3.096	2.62169	3.64596	3.91434	3.50828	4.22644	4.33807	3.78014	4.43582	5.30018	4.29848	3.77961	4.44861	4.4879	4.16705	4.17096	3.69496	2.81483	3.68953	4.11488	4.67816
A0A0H3BYD4	2	2	19.4643	1.04591e-10	2.20112	31683.6	Mevalonate kinase OS=Streptococcus pyogenes serotype M49 (strain NZ131) OX=471876 GN=mvaK1 PE=4 SV=1	0.249333	0.243233	0.265462	0.18578	0.189709	0.231845	0.245943	0.245213	0.285298	0.26803	0.246037	0.305847	0.274778	0.276166	0.313868	0.415033	0.387973	0.440297	0.345261	0.363146	0.379379	0.225574	0.219844	0.237999	0.178196	0.189323	0.197331	0.208639	0.19176	0.218643	0.252676	0.202444	0.258818	0.273305	0.28827	0.414434	0.362595	0.227806	0.188283	0.206347
A0A0H3BZR7	29	24	292.894	0.0128069	1.37696	52982.3	Mid-cell-anchored protein Z OS=Streptococcus pyogenes serotype M49 (strain NZ131) OX=471876 GN=mapZ PE=3 SV=1	10.4025	11.8395	9.57139	9.79864	11.5972	9.00757	10.2571	10.7071	8.929	8.82563	9.67439	7.79827	9.23943	9.83739	8.52072	11.5295	12.2693	10.1469	11.8648	13.3778	10.9692	9.68797	9.8714	9.25372	10.086	11.1632	9.33795	8.6696	10.0205	8.73108	10.6045	10.1345	9.96438	8.7661	9.19918	11.3152	12.0706	9.60436	10.1957	9.1404
A0A0H3C0A1	10	9	97.2477	4.81596e-05	2.28828	22116.5	MTS domain-containing protein OS=Streptococcus pyogenes serotype M49 (strain NZ131) OX=471876 GN=Spy49_0976c PE=4 SV=1	2.64456	2.87875	2.18801	1.47996	1.84329	1.25354	2.42341	3.02135	1.93872	3.6273	3.89969	2.94598	2.81343	3.23485	2.51577	2.81728	3.31682	2.41726	1.95982	2.29865	1.61053	2.15859	2.43459	2.00196	1.63272	1.9581	1.55596	2.45765	2.9199	2.46512	2.57044	1.5256	2.46116	3.49099	2.85468	2.85045	1.95633	2.19838	1.71559	2.61422
A0A0H3BYZ3	4	4	40.3218	0.661418	1.28015	31986	MTS domain-containing protein OS=Streptococcus pyogenes serotype M49 (strain NZ131) OX=471876 GN=Spy49_1128 PE=4 SV=1	0.47088	0.594163	0.425061	0.5023	0.611126	0.461523	0.487825	0.521206	0.399315	0.497514	0.533903	0.43906	0.402431	0.538257	0.408182	0.405994	0.533394	0.437314	0.489186	0.537575	0.423435	0.407054	0.459745	0.363486	0.437499	0.503068	0.433238	0.45181	0.520311	0.46288	0.496702	0.524983	0.469449	0.490159	0.449623	0.458901	0.483399	0.410095	0.457935	0.478334
A0A0H3C0Q8	2	2	14.1684	0.620332	1.64713	17460.6	MutT/nudix family protein OS=Streptococcus pyogenes serotype M49 (strain NZ131) OX=471876 GN=mutT PE=3 SV=1	0.26361	0.251549	0.393483	0.301455	0.271399	0.422136	0.181299	0.171044	0.308415	0.235275	0.224124	0.356808	0.359695	0.258775	0.391538	0.301668	0.220952	0.404677	0.303539	0.281905	0.478892	0.365719	0.26559	0.457046	0.392068	0.251965	0.41966	0.328818	0.229424	0.387836	0.302881	0.331663	0.220253	0.272069	0.336669	0.309099	0.354778	0.362785	0.354564	0.315359
A0A0H3C0T2	5	5	42.493	1.11022e-16	3.81521	29668	Myo-inositol-1(Or 4)-monophosphatase OS=Streptococcus pyogenes serotype M49 (strain NZ131) OX=471876 GN=Spy49_0989c PE=4 SV=1	0.555851	0.636715	0.607379	0.376231	0.408683	0.456049	0.500612	0.603459	0.600405	0.614239	0.593922	0.674456	0.710019	0.618302	0.808995	1.61359	1.54442	1.57653	1.3558	1.51913	1.48638	0.537743	0.532222	0.581874	0.384976	0.420881	0.454095	0.446975	0.401743	0.449191	0.599982	0.413654	0.568158	0.627539	0.712439	1.57818	1.45377	0.550613	0.419984	0.432636
A0A0H3BWZ6	8	7	71.6636	2.63423e-09	1.73401	22096.9	N5-carboxyaminoimidazole ribonucleotide mutase OS=Streptococcus pyogenes serotype M49 (strain NZ131) OX=471876 GN=purE PE=3 SV=1	7.11581	8.45755	7.56351	8.20817	8.9523	8.82691	6.70386	7.25582	7.00893	5.1943	5.59176	5.6465	6.62723	7.33286	6.85012	7.92051	8.08271	7.82634	9.19603	10.4101	8.88811	7.7388	7.59406	7.5544	7.83809	8.19795	7.98331	8.01992	7.95916	8.03232	7.71229	8.66246	6.98954	5.47752	6.93674	7.94319	9.4981	7.62909	8.00645	8.0038
A0A0H3BYA6	2	2	12.3256	1.43532e-05	3.64711	39360.7	N5-carboxyaminoimidazole ribonucleotide synthase OS=Streptococcus pyogenes serotype M49 (strain NZ131) OX=471876 GN=purK PE=3 SV=1	0.0798542	0.0982746	0.122983	0.160722	0.101593	0.172627	0.0725951	0.0613292	0.0865087	0.0467488	0.0362535	0.0693861	0.106498	0.0922259	0.122182	0.110604	0.107363	0.139042	0.117091	0.103576	0.133603	0.148594	0.109759	0.162135	0.17982	0.159585	0.216372	0.189215	0.143657	0.195924	0.100371	0.144981	0.0734777	0.0507961	0.106969	0.119003	0.11809	0.140163	0.185259	0.176265
A0A0H3C0Z6	15	13	139.099	4.86455e-06	1.89645	41255.6	N-acetylglucosamine-6-phosphate deacetylase OS=Streptococcus pyogenes serotype M49 (strain NZ131) OX=471876 GN=nagA PE=3 SV=1	4.58312	5.19591	4.92784	6.04065	7.36215	7.00543	5.49865	6.32989	7.01317	6.61102	7.74508	9.29545	5.42666	5.73869	5.86909	3.76052	4.24648	4.46449	6.65604	8.16541	7.79467	5.50516	6.10136	6.36955	6.04612	7.68251	7.26957	6.69824	7.01185	7.70118	4.90229	6.80274	6.28057	7.88385	5.67815	4.15716	7.53871	5.99202	6.9994	7.13709
A0A0H3C0K0	10	8	87.9319	1.3214e-11	1.6403	31376.2	NAD kinase OS=Streptococcus pyogenes serotype M49 (strain NZ131) OX=471876 GN=nadK PE=3 SV=1	2.93207	3.13962	2.9962	3.04339	3.23095	3.2239	3.03101	2.75358	3.15279	4.002	3.75235	3.6888	3.03966	3.24372	3.27255	3.82287	3.73294	3.79973	4.80047	4.4704	4.71951	3.1847	3.42747	3.15602	2.88894	2.90008	2.83364	2.81396	2.9522	2.76299	3.02263	3.16608	2.97913	3.81438	3.18531	3.78518	4.66346	3.25606	2.87422	2.84305
A0A0H3BYT5	24	18	301.484	0	38.3792	41083.6	NAD-dependent malic enzyme OS=Streptococcus pyogenes serotype M49 (strain NZ131) OX=471876 GN=Spy49_0864 PE=3 SV=1	2.16963	2.58548	1.94158	2.90936	3.36072	2.32372	1.1281	1.26465	0.941672	36.6967	40.4606	29.1042	1.67862	1.79176	1.489	0.921634	1.03996	0.807132	1.16383	1.22518	0.989779	2.21027	2.59382	2.00993	2.97486	3.25628	2.77248	2.93844	3.12231	2.71591	2.23223	2.8646	1.11147	35.4205	1.65313	0.922909	1.12626	2.27134	3.00121	2.92555
A0A0H3C0G8	10	10	123.274	0.788676	1.21425	22592.1	NADH dehydrogenase OS=Streptococcus pyogenes serotype M49 (strain NZ131) OX=471876 GN=Spy49_0843 PE=4 SV=1	5.40299	5.69066	6.43329	5.84907	5.5827	7.1789	5.45997	5.05112	6.99703	5.25785	5.07245	6.97608	6.07826	5.20362	6.60643	6.27089	5.1277	7.00912	6.66891	6.26928	8.07603	6.72088	5.44418	6.95339	6.77639	5.60492	6.88722	6.48025	5.66323	7.14891	5.84231	6.20356	5.83604	5.7688	5.96277	6.1359	7.00474	6.37282	6.42284	6.4308
A0A0H3C052	32	26	442.254	0.000106981	1.61454	49889.8	NADH oxidase OS=Streptococcus pyogenes serotype M49 (strain NZ131) OX=471876 GN=nox1 PE=4 SV=1	35.5347	37.4413	39.6677	43.267	40.9143	50.9968	53.7702	48.736	65.2112	54.7141	53.4145	68.6253	40.5944	37.0631	46.7816	35.8619	33.4316	41.4025	34.1903	35.6229	39.6632	44.0757	39.6012	47.7163	47.4219	42.8035	49.3073	46.7309	43.2392	50.1428	37.5479	45.0593	55.9058	58.918	41.4797	36.8987	36.4921	43.7978	46.5109	46.7043
A0A0H3BZ89	14	11	140.117	0.603906	1.33587	31079.6	NH(3)-dependent NAD(+) synthetase OS=Streptococcus pyogenes serotype M49 (strain NZ131) OX=471876 GN=nadE PE=1 SV=1	2.01781	2.29681	2.58212	2.36724	2.33452	3.07402	2.63445	1.97225	3.18035	2.4985	2.54276	3.27617	2.38282	2.21779	2.67533	2.4572	2.13262	2.9724	2.80649	2.64916	3.75752	2.62167	2.24063	2.92416	2.53426	1.86613	2.80616	2.30851	2.16423	2.54975	2.29892	2.59193	2.59568	2.77248	2.42531	2.52074	3.07106	2.59548	2.40218	2.34083
A0A0H3BZS0	33	29	329.426	0.63152	1.232	55088.8	Nicotinate phosphoribosyltransferase OS=Streptococcus pyogenes serotype M49 (strain NZ131) OX=471876 GN=Spy49_1282c PE=3 SV=1	6.01838	6.33541	7.13448	7.1268	7.16563	9.71719	6.91216	6.69669	9.73734	6.34419	6.0494	8.04502	6.36375	6.14696	7.92476	6.59123	6.14055	7.4359	6.93995	7.49524	8.34998	7.25882	6.0589	7.673	7.55485	6.84417	7.83275	7.33314	6.56325	8.03443	6.49609	8.00321	7.78206	6.81287	6.81182	6.72256	7.59506	6.9969	7.41059	7.31027
A0A0H3BX68	2	2	12.3652	1.9984e-15	5.06332	50878.8	Nicotine adenine dinucleotide glycohydrolase (NADGH) OS=Streptococcus pyogenes serotype M49 (strain NZ131) OX=471876 GN=nga PE=4 SV=1	0.249374	0.264983	0.246182	0.238285	0.288639	0.255925	0.109156	0.126679	0.112348	0.0620052	0.0768718	0.058453	0.0906583	0.118087	0.0887966	0.048737	0.0588736	0.0470014	0.0524381	0.0714895	0.0491515	0.12099	0.133614	0.114729	0.0632406	0.0676467	0.0623223	0.0527525	0.0546063	0.0694254	0.253513	0.26095	0.116061	0.0657767	0.0991806	0.0515373	0.057693	0.123111	0.0644032	0.0589281
A0A0H3BYT6	35	29	502.14	0.00051652	1.25342	49749	Non-phosphorylating glyceraldehyde-3-phosphate dehydrogenase (NADP) OS=Streptococcus pyogenes serotype M49 (strain NZ131) OX=471876 GN=gapN PE=4 SV=1	44.8612	49.3527	47.9376	38.2388	40.7496	42.2097	45.1444	45.5566	50.4793	47.1219	47.8544	50.4278	46.6893	46.5803	50.6803	50.8576	49.6648	51.3902	44.3168	48.0754	48.1283	44.2045	41.4188	45.9787	42.7641	40.7418	45.4612	48.3843	45.211	49.9276	47.3838	40.3993	47.0601	48.4681	47.9833	50.6375	46.8401	43.8673	42.989	47.841
A0A0H3BY55	28	27	330.455	0.223488	1.39626	68833.2	Non-specific serine/threonine protein kinase OS=Streptococcus pyogenes serotype M49 (strain NZ131) OX=471876 GN=Spy49_1257c PE=4 SV=1	4.85153	6.02584	7.1385	6.98139	6.81578	9.06066	7.47626	7.13893	8.88146	6.70862	6.21473	10.0042	5.87653	5.48557	6.82377	5.39616	4.65195	6.78011	5.56546	4.88316	6.97872	7.19928	5.86323	7.24699	7.10308	5.0943	8.36575	7.20518	6.49416	7.47663	6.00529	7.61928	7.83222	7.64252	6.06196	5.60941	5.80911	6.76983	6.85438	7.05866
A0A0H3C0B3	12	8	147.459	8.38855e-06	1.54263	11808.6	Nucleoid-associated protein Spy49_1532 OS=Streptococcus pyogenes serotype M49 (strain NZ131) OX=471876 GN=Spy49_1532 PE=3 SV=1	19.1976	17.6953	20.1499	21.9088	20.6406	23.0376	17.5809	16.4067	19.1199	14.4716	13.5928	15.915	18.1475	15.4316	17.6402	18.6264	16.9491	19.5312	20.8111	20.642	23.9871	20.7706	19.9103	22.0791	22.9288	20.9381	23.9771	20.867	18.3458	21.0762	19.0143	21.8623	17.7025	14.6598	17.0731	18.3689	21.8134	20.92	22.6147	20.0964
A0A0H3C230	2	2	13.6378	3.09705e-09	1.63904	42646	Nucleoside permease nupC OS=Streptococcus pyogenes serotype M49 (strain NZ131) OX=471876 GN=nupC PE=3 SV=1	1.72009	1.74005	1.85489	1.12504	1.0518	1.24065	1.4087	1.32965	1.54903	1.90473	1.68828	2.00838	1.79152	1.68144	1.92285	1.34294	1.2817	1.40182	1.61392	1.61993	1.67144	1.68151	1.49098	1.73966	1.16256	1.11068	1.19228	1.19188	1.16809	1.28528	1.77168	1.13916	1.42913	1.86713	1.7986	1.34215	1.6351	1.63738	1.15517	1.21508
B5XKL0	22	19	215.251	0.357928	1.25795	33701.3	Nucleotide-binding protein Spy49_0545 OS=Streptococcus pyogenes serotype M49 (strain NZ131) OX=471876 GN=Spy49_0545 PE=3 SV=1	5.67892	6.48586	4.94079	6.73853	7.61717	5.49178	6.79595	7.15507	5.28095	7.38293	8.07697	6.05804	6.13731	7.25328	5.14288	5.66243	6.51065	5.28836	6.79137	8.11389	6.4188	5.87049	6.40006	5.49116	6.17681	7.10809	6.06085	6.74587	7.1731	6.53181	5.70186	6.61583	6.41066	7.17265	6.17782	5.82048	7.10802	5.92057	6.44858	6.81692
A0A0H3C094	5	5	31.423	3.56382e-14	2.26997	31476.3	Octanoyl-[GcvH]:protein N-octanoyltransferase OS=Streptococcus pyogenes serotype M49 (strain NZ131) OX=471876 GN=lipL PE=3 SV=1	0.240388	0.246965	0.236268	0.18789	0.171991	0.203131	0.30491	0.28348	0.282622	0.30467	0.305084	0.305952	0.336067	0.318792	0.304956	0.298993	0.333053	0.340583	0.244477	0.243298	0.262521	0.221343	0.239006	0.220431	0.140946	0.148406	0.139125	0.144156	0.164011	0.153764	0.241207	0.187671	0.290337	0.305235	0.319938	0.324209	0.250099	0.226927	0.142826	0.153977
A0A0H3BZ09	5	4	50.6254	0.0748602	1.29658	24180.8	Octaprenyl-diphosphate synthase / Dimethylallyltransferase / Geranyltranstransferase / Geranylgeranyl pyrophosphate synthetase OS=Streptococcus pyogenes serotype M49 (strain NZ131) OX=471876 GN=fps PE=4 SV=1	1.2895	1.36891	1.0936	1.28171	1.53549	1.18984	1.29659	1.27753	1.19575	1.36711	1.48564	1.24003	1.11273	1.22615	1.11078	1.42485	1.6421	1.40582	1.34964	1.58161	1.21454	1.14645	1.28034	1.13283	1.21746	1.35262	1.21961	1.33295	1.46438	1.27923	1.25067	1.33568	1.25662	1.36426	1.14989	1.49092	1.38193	1.18654	1.26323	1.35885
B5XK69	37	34	365.524	7.78715e-10	3.41543	67579.4	Oleate hydratase OS=Streptococcus pyogenes serotype M49 (strain NZ131) OX=471876 GN=sph PE=1 SV=2	10.1709	11.2366	8.42976	18.7702	23.0202	15.3352	14.4707	16.141	11.4899	17.7346	19.9607	14.3041	8.55939	9.09857	7.26392	5.89838	6.48395	5.17469	6.92759	8.21122	6.76706	12.8357	14.259	12.1734	17.982	20.3506	16.146	19.7046	21.7775	18.4827	9.94575	19.0419	14.0339	17.3331	8.30729	5.85234	7.30196	13.0894	18.1595	19.9883
A0A0H3BWS8	43	37	603.19	4.56358e-10	2.33197	72145.7	Oligopeptide ABC transporter_ periplasmic oligopeptide-binding protein oppA OS=Streptococcus pyogenes serotype M49 (strain NZ131) OX=471876 GN=oppA PE=3 SV=1	24.328	30.4885	24.6543	20.9655	25.4704	22.8632	25.8329	27.257	25.1538	27.5655	29.5293	30.3272	29.6748	32.7161	30.4844	36.2563	40.6559	38.4245	33.8584	39.9558	31.2371	24.6343	25.4318	24.9342	22.0675	23.0973	21.7055	16.3348	16.1972	16.9268	26.4903	23.0997	26.0812	29.1407	30.9584	38.4455	35.0171	25.0001	22.2901	16.4863
A0A0H3BZ40	13	12	157.708	0	2.56562	39759.9	Oligopeptide transport ATP-binding protein oppD OS=Streptococcus pyogenes serotype M49 (strain NZ131) OX=471876 GN=oppD PE=3 SV=1	6.79974	7.24521	6.64361	4.46463	4.82341	4.21331	6.17896	6.24616	6.14517	7.18213	7.45812	7.24332	7.40174	8.01374	7.49412	9.46755	9.58368	9.36955	11.2395	12.1572	11.2427	6.09642	5.90661	5.97602	4.8472	4.7785	4.76775	4.9873	5.17428	5.01084	6.89619	4.50045	6.19009	7.29452	7.63653	9.47359	11.5464	5.99301	4.79782	5.05747
A0A0H3BVS5	18	16	200.288	1.72889e-10	1.44491	34716	Oligopeptide transport ATP-binding protein oppF OS=Streptococcus pyogenes serotype M49 (strain NZ131) OX=471876 GN=oppF PE=3 SV=1	5.70031	6.3276	5.61872	5.08285	5.42274	5.18358	5.97683	6.34303	6.09202	6.67996	7.29321	6.52343	6.38459	6.6004	6.38285	7.40167	7.3217	7.44643	6.95196	7.18043	7.56963	5.33772	5.5164	5.40989	4.98432	5.18662	5.17241	5.4993	5.75246	5.93192	5.88221	5.22972	6.13729	6.8322	6.45595	7.38993	7.23401	5.42134	5.11445	5.72789
A0A0H3BYP3	5	5	40.4097	0.000197451	2.77181	34919.9	Oligopeptide transport system permease protein oppC OS=Streptococcus pyogenes serotype M49 (strain NZ131) OX=471876 GN=oppC PE=3 SV=1	0.541792	0.526712	0.757289	0.424791	0.326874	0.586478	0.593061	0.504162	0.912102	0.790184	0.686502	1.25748	0.894979	0.693956	1.16261	1.22679	0.961445	1.52085	1.15145	1.01844	1.47221	0.651478	0.480059	0.712305	0.471948	0.367051	0.527497	0.596741	0.462005	0.712496	0.608598	0.446048	0.669775	0.911387	0.91718	1.23636	1.21403	0.614614	0.455499	0.590414
A0A0H3BXE6	22	16	212.605	0.198795	1.3878	56135.6	Oligopeptide transport system permease protein OS=Streptococcus pyogenes serotype M49 (strain NZ131) OX=471876 GN=oppB PE=3 SV=1	9.11502	10.3372	8.04772	9.27362	11.5376	7.58645	8.69087	8.77862	7.32633	8.63694	8.62123	6.7426	8.7245	8.74367	7.09984	9.66392	11.4517	8.02157	10.9636	12.7733	9.57141	8.28312	9.01545	7.62327	9.17568	10.2663	8.11451	8.71553	9.95868	8.28843	9.16665	9.46589	8.26527	8.00026	8.18933	9.7124	11.1028	8.30728	9.1855	8.98755
B5XMC1	37	31	467.621	5.3466e-10	3.51605	38011.3	Ornithine carbamoyltransferase OS=Streptococcus pyogenes serotype M49 (strain NZ131) OX=471876 GN=arcB PE=3 SV=1	105.892	120.867	98.7976	61.5223	75.5125	51.3435	138.293	157.021	122.172	227.615	234.52	200.212	119.876	129.492	108.253	67.7126	77.6291	60.8012	77.1965	94.7784	68.5358	119.621	130.717	114.16	68.636	80.0436	65.4872	86.6161	95.4667	85.3347	108.519	62.7927	139.162	220.782	119.207	68.7143	80.1702	121.499	71.389	89.1392
A0A0H3C063	11	9	106.307	3.10862e-15	7.04031	22799.3	Orotate phosphoribosyltransferase OS=Streptococcus pyogenes serotype M49 (strain NZ131) OX=471876 GN=pyrE PE=3 SV=1	1.05949	1.31191	1.05087	1.03692	1.21287	0.922119	0.810349	0.963392	0.687791	1.34147	1.47761	1.19571	1.20528	1.35973	1.16036	1.78913	1.99921	1.75687	5.69933	6.38917	5.24144	1.13207	1.27194	1.12866	1.09126	1.20686	1.06748	1.16147	1.16397	1.13456	1.14076	1.0573	0.820511	1.33826	1.24179	1.8484	5.77665	1.17756	1.12187	1.15333
B5XL15	7	5	61.8219	4.5172e-08	1.99368	25160.9	Orotidine 5'-phosphate decarboxylase OS=Streptococcus pyogenes serotype M49 (strain NZ131) OX=471876 GN=pyrF PE=3 SV=1	1.11841	1.18748	1.27099	1.19196	1.27988	1.431	1.04525	1.06831	1.2844	1.13036	1.17248	1.29669	1.41169	1.28887	1.55293	1.6651	1.55008	1.94959	2.15001	2.0602	2.56424	1.29253	1.28895	1.36298	1.39275	1.34484	1.4371	1.71383	1.60822	1.7274	1.1923	1.30095	1.13265	1.19984	1.41783	1.72159	2.25815	1.31482	1.39156	1.68315
A0A0H3BY43	4	4	52.3829	2.47891e-12	1.84746	21664.5	Oxyacylglutathione hydrolase OS=Streptococcus pyogenes serotype M49 (strain NZ131) OX=471876 GN=Spy49_0539c PE=4 SV=1	1.29027	1.31358	1.34288	1.42763	1.6775	1.64004	1.37028	1.40828	1.61578	1.05843	1.07096	1.13221	1.79582	1.85592	1.89987	1.74517	1.83751	1.82095	1.78705	1.99775	1.80258	1.36635	1.3193	1.41184	1.19306	1.14819	1.17477	1.02068	1.00597	0.997706	1.31558	1.58172	1.46478	1.0872	1.85054	1.80121	1.86246	1.36583	1.17201	1.00812
A0A0H3C0Y7	5	5	43.4508	6.13673e-06	2.63327	12456.4	PadR domain-containing protein OS=Streptococcus pyogenes serotype M49 (strain NZ131) OX=471876 GN=Spy49_1781 PE=4 SV=1	0.801872	0.701354	0.822167	0.568947	0.672678	0.59868	0.329349	0.411248	0.441886	0.334967	0.36042	0.403004	0.807734	0.802225	0.860468	0.791314	0.572141	0.868968	0.942537	0.813515	1.13631	0.746052	0.675682	0.967903	0.685724	0.61409	0.918906	0.776114	0.711721	0.800413	0.775131	0.613435	0.394161	0.36613	0.823476	0.744141	0.964121	0.796546	0.739573	0.762749
A0A0H3C013	11	11	90.4991	5.96091e-11	2.64913	66741.7	Para-aminobenzoate synthase_ aminase component / Aminodeoxychorismate lyase OS=Streptococcus pyogenes serotype M49 (strain NZ131) OX=471876 GN=papB PE=3 SV=1	0.313409	0.308506	0.289153	0.343565	0.388905	0.288499	0.402121	0.444621	0.37131	0.560352	0.586791	0.510687	0.403463	0.379098	0.337471	0.441562	0.39305	0.421181	0.199795	0.228338	0.197668	0.269044	0.279794	0.28146	0.314937	0.320938	0.314176	0.524016	0.566605	0.501184	0.303689	0.340323	0.406017	0.55261	0.373344	0.418598	0.2086	0.276766	0.316684	0.530602
A0A0H3BVL7	5	5	43.3734	4.0215e-05	1.96052	14716.5	ParB domain-containing protein OS=Streptococcus pyogenes serotype M49 (strain NZ131) OX=471876 GN=Spy49_0168 PE=4 SV=1	1.84733	1.82343	1.75157	1.39114	1.35783	1.27022	1.44016	1.18309	1.28312	1.3522	0.984838	0.965833	1.8334	1.43113	1.79978	2.23831	1.65276	2.58429	1.82116	1.80369	2.20529	1.6281	1.55679	1.4368	1.53466	1.23061	1.3986	1.27256	1.11512	1.38266	1.80744	1.33973	1.30212	1.10096	1.68811	2.15845	1.94338	1.54056	1.38796	1.25678
A0A0H3BY10	8	5	91.9795	8.00429e-11	1.40753	8871.13	PC4 domain-containing protein OS=Streptococcus pyogenes serotype M49 (strain NZ131) OX=471876 GN=Spy49_0501 PE=4 SV=1	10.8655	11.0844	10.7485	13.3	13.9123	13.9547	9.84372	10.0801	10.5365	9.8101	10.1418	10.0827	10.1162	10.3117	9.31014	9.72329	9.95579	10.5576	12.0106	12.7694	13.5037	11.4862	10.9698	11.6396	13.7276	13.7567	14.373	12.074	11.4294	11.9115	10.8995	13.7223	10.1534	10.0115	9.91269	10.0789	12.7612	11.3652	13.9524	11.805
A0A0H3BY88	7	7	103.524	9.38672e-08	5.94638	14658.4	PepSY domain-containing protein OS=Streptococcus pyogenes serotype M49 (strain NZ131) OX=471876 GN=Spy49_1308c PE=4 SV=1	12.622	11.3459	16.7885	23.9682	20.6871	33.5242	17.1957	15.5856	24.3784	8.07972	6.85323	11.431	28.0176	24.2069	37.6859	17.9254	14.798	21.9057	14.3031	12.2778	19.4631	25.4167	18.7011	27.3389	18.4245	14.6142	20.968	5.11845	4.20315	5.79859	13.5855	26.0598	19.0533	8.78798	29.9701	18.2097	15.348	23.8189	18.0022	5.04007
B5XKT3	14	12	137.774	1.87099e-09	1.3188	45150	Peptidase T OS=Streptococcus pyogenes serotype M49 (strain NZ131) OX=471876 GN=pepT PE=3 SV=1	4.22215	4.38553	3.96233	4.42996	4.89791	4.79845	4.50889	4.4809	4.61527	5.08206	5.21314	5.60493	4.0312	3.99548	4.02984	4.12645	3.96703	4.00144	4.21549	4.14896	4.12752	4.48595	4.28723	4.23514	5.01146	4.92749	4.88054	5.02909	4.96374	5.18745	4.19	4.70877	4.53502	5.30004	4.01884	4.03164	4.16399	4.33611	4.93983	5.06009
A0A0H3C0G5	4	4	54.146	5.71091e-06	1.80627	48408.6	Peptidase_M16_C domain-containing protein OS=Streptococcus pyogenes serotype M49 (strain NZ131) OX=471876 GN=Spy49_1803c PE=4 SV=1	2.42137	2.58335	2.15517	2.32202	2.69999	2.21594	1.67277	1.97068	1.62268	1.4788	1.47011	1.36005	1.96619	2.3235	1.87233	2.46176	2.95321	2.36818	2.50476	2.77052	2.33377	1.9543	2.25011	1.87853	1.98313	2.36191	1.97758	1.68367	1.95926	1.71055	2.38663	2.41265	1.75538	1.43632	2.05401	2.59438	2.53635	2.02765	2.10754	1.78449
B5XLI8	37	31	428.882	0.113221	1.30255	40568.7	Peptide chain release factor 1 OS=Streptococcus pyogenes serotype M49 (strain NZ131) OX=471876 GN=prfA PE=3 SV=1	4.22594	5.18634	4.2002	5.30241	5.88801	4.26807	4.86709	4.71772	3.83711	4.45833	4.65307	3.59448	4.66183	4.61324	3.85692	5.63321	6.13171	4.78515	4.95603	5.45663	4.31314	4.80842	4.81741	3.94538	5.0705	5.32849	4.75401	5.35763	5.33821	5.36573	4.53749	5.15283	4.47397	4.2353	4.37733	5.51669	4.9086	4.52374	5.051	5.35386
A0A0H3BZT5	14	14	130.319	0.517624	1.45341	37056.6	Peptide chain release factor 2 OS=Streptococcus pyogenes serotype M49 (strain NZ131) OX=471876 GN=prfB PE=3 SV=1	2.7253	2.14654	3.263	3.08236	2.49655	3.87589	2.44276	1.80478	3.09205	2.04638	1.703	2.75587	2.7161	2.17054	3.23164	2.7868	2.05282	3.1935	2.94754	2.36653	3.66764	3.19071	2.5525	3.46036	3.27858	2.40241	3.49631	3.04903	2.38982	3.26487	2.71161	3.1516	2.44653	2.16842	2.70609	2.67771	2.9939	3.06786	3.0591	2.90124
B5XM60	33	27	318.558	0.0475308	1.32061	58282.2	Peptide chain release factor 3 OS=Streptococcus pyogenes serotype M49 (strain NZ131) OX=471876 GN=prfC PE=3 SV=1	5.95845	6.8653	5.4743	6.73386	7.75326	6.02058	6.31508	6.30186	5.35426	6.32302	6.50025	5.4456	5.6285	5.96677	4.9559	6.44798	6.8375	5.81679	6.36408	7.00622	5.99381	6.02331	6.57499	5.79419	6.86208	7.56468	6.43367	7.09231	7.81031	6.95509	6.09935	6.8359	5.9904	6.08962	5.51706	6.36742	6.4547	6.13083	6.95348	7.2859
B5XIL1	19	16	210.284	0.133198	1.36735	22975.4	Peptide deformylase OS=Streptococcus pyogenes serotype M49 (strain NZ131) OX=471876 GN=def PE=3 SV=1	11.1975	11.9787	14.3337	13.3777	11.6157	15.2584	11.3069	10.2774	14.0893	10.0247	11.0014	13.3201	12.1238	11.926	13.768	12.5907	11.2071	13.6023	11.2381	10.1386	12.1188	13.8206	11.9576	13.7171	14.9791	11.5363	15.7139	16.0809	13.4896	16.2295	12.5033	13.4172	11.8912	11.4488	12.6059	12.4667	11.1652	13.1651	14.0764	15.2667
A0A0H3BYC9	2	2	13.4537	4.09176e-08	1.5211	16008.6	Peptide deformylase OS=Streptococcus pyogenes serotype M49 (strain NZ131) OX=471876 GN=Spy49_0684 PE=3 SV=1	0.77449	0.962773	0.901736	1.32025	1.34071	1.24823	0.975935	1.14239	1.09873	0.87802	0.853235	0.838723	0.96615	1.04857	0.940375	0.827927	0.900275	0.846593	0.892833	0.909881	0.805917	0.925806	0.977164	1.0101	1.14751	1.11242	1.17847	1.0878	1.10696	1.17669	0.879666	1.30306	1.07235	0.856659	0.985032	0.858265	0.869543	0.971025	1.14613	1.12381
B5XK66	3	3	26.377	5.55112e-16	2.97385	19622.7	Peptide methionine sulfoxide reductase MsrA OS=Streptococcus pyogenes serotype M49 (strain NZ131) OX=471876 GN=msrA PE=3 SV=1	0.370227	0.426893	0.342263	0.546174	0.548968	0.543336	0.506552	0.517232	0.522525	0.608811	0.536716	0.55655	0.355823	0.354454	0.316297	0.254995	0.269104	0.220848	0.271874	0.275063	0.250844	0.37583	0.418758	0.383838	0.58558	0.599087	0.600179	0.737808	0.732606	0.744944	0.379794	0.546159	0.515436	0.567359	0.342191	0.248316	0.265927	0.392809	0.594949	0.738453
A0A0H3BX40	12	10	153.953	2.78449e-09	2.8068	29388.1	Peptidyl-prolyl cis-trans isomerase OS=Streptococcus pyogenes serotype M49 (strain NZ131) OX=471876 GN=cypB PE=3 SV=1	7.5471	9.51177	7.69512	7.78465	9.54306	7.06198	8.06561	8.71563	6.93599	6.32204	6.73124	5.52953	7.99629	8.94285	6.85136	7.5552	7.8621	7.06526	2.78272	3.03196	3.00461	7.42144	8.13941	7.00059	7.68125	8.61473	7.45739	6.62991	7.41573	6.46762	8.25133	8.1299	7.90574	6.19427	7.93017	7.49418	2.93976	7.52048	7.91779	6.83776
B5XIP6	6	6	67.0698	8.23759e-08	1.44158	21196.6	Peptidyl-tRNA hydrolase OS=Streptococcus pyogenes serotype M49 (strain NZ131) OX=471876 GN=pth PE=1 SV=1	2.30574	2.21367	2.33016	2.35747	2.38242	2.28814	1.88606	1.83358	2.02161	1.77689	1.70392	1.86241	2.33281	2.08193	2.30533	2.4585	2.44772	2.50172	2.53984	2.48053	2.68232	2.13253	2.16514	2.40765	2.15182	2.34675	2.43504	2.57638	2.38253	2.59142	2.28319	2.34268	1.91375	1.78107	2.24002	2.46932	2.56756	2.2351	2.31121	2.51678
A0A0H3BXS9	4	4	31.8603	0.000332523	2.10502	44079.8	Permease_ putative OS=Streptococcus pyogenes serotype M49 (strain NZ131) OX=471876 GN=Spy49_0657 PE=4 SV=1	0.416012	0.420929	0.486011	0.419094	0.43063	0.498064	0.501109	0.462038	0.617308	0.413761	0.338953	0.515268	0.459116	0.405519	0.496094	0.639844	0.552285	0.725701	0.421054	0.460466	0.51517	0.445107	0.3858	0.469855	0.430208	0.361103	0.468608	0.305581	0.275547	0.329947	0.440984	0.449262	0.526818	0.422661	0.453576	0.639276	0.465563	0.433587	0.419973	0.303692
A0A0H3BXR8	6	5	46.2743	2.89102e-13	9.06664	47605.7	PGA_cap domain-containing protein OS=Streptococcus pyogenes serotype M49 (strain NZ131) OX=471876 GN=Spy49_0642 PE=3 SV=1	1.11709	1.31864	1.46636	1.14738	1.33064	1.33485	1.25931	1.32733	1.49734	1.30272	1.28217	1.6362	1.23919	1.23403	1.34233	1.02502	1.00217	1.12138	0.498502	0.529971	0.521722	1.30672	1.13582	1.30416	0.825681	0.82977	0.933498	0.156728	0.147189	0.161646	1.3007	1.27096	1.36133	1.40703	1.27185	1.04952	0.516732	1.2489	0.862983	0.155188
B5XKQ6	20	20	208.039	0.00744788	1.65629	39420.9	Phenylalanine--tRNA ligase alpha subunit OS=Streptococcus pyogenes serotype M49 (strain NZ131) OX=471876 GN=pheS PE=3 SV=1	10.4363	10.5308	12.3962	10.2596	9.44846	12.008	9.92706	8.09976	9.87722	9.12458	7.80902	8.67983	11.0284	9.1982	10.7665	12.5308	9.43011	14.3518	14.3173	10.9284	17.1776	11.9011	10.0361	12.2913	10.9116	9.34396	10.3029	9.15899	8.59134	9.30864	11.1211	10.572	9.30135	8.53781	10.331	12.1042	14.1411	11.4095	10.1862	9.01966
A0A0H3BZX5	39	32	408.908	3.11672e-05	1.66433	87652.2	Phenylalanine--tRNA ligase beta subunit OS=Streptococcus pyogenes serotype M49 (strain NZ131) OX=471876 GN=pheT PE=3 SV=1	8.12095	9.15867	7.3017	7.17678	8.6491	7.49813	7.41688	8.18284	7.16874	6.1753	7.16356	6.70383	7.11181	8.16202	7.22691	9.23575	10.888	8.87314	11.1056	12.7983	9.45366	7.32834	7.90149	7.06933	6.84192	7.68672	6.46393	6.60317	7.13304	6.84357	8.19377	7.77467	7.58949	6.6809	7.50024	9.66563	11.1192	7.43306	6.99752	6.85992
A0A0H3C0D3	6	5	63.0488	0	5.44803	12562.3	PhnA protein OS=Streptococcus pyogenes serotype M49 (strain NZ131) OX=471876 GN=Spy49_1014c PE=3 SV=1	3.99866	4.41106	3.94308	3.65652	3.98009	3.46809	2.94237	2.82569	2.52834	1.09048	1.09553	0.999546	4.00536	4.06163	3.57599	5.6292	6.11072	5.61511	2.30942	2.49974	2.27796	3.56108	3.30853	3.43043	2.32933	2.44995	2.38344	2.27314	2.32847	2.22908	4.1176	3.70156	2.76547	1.06185	3.88099	5.78501	2.36237	3.43335	2.38757	2.2769
A0A0H3BY96	33	26	440.692	1.55431e-15	2.02858	35908.2	Phosphate acetyltransferase OS=Streptococcus pyogenes serotype M49 (strain NZ131) OX=471876 GN=pta PE=3 SV=1	19.9658	22.2955	21.0922	13.5764	14.0287	13.2343	20.8299	19.6661	20.9981	23.5695	22.6565	24.4178	22.9318	21.4356	23.9449	27.4149	26.3819	28.3318	26.6307	27.4564	28.7588	20.4196	20.2761	20.5165	14.3569	13.6306	14.1855	16.0889	14.6837	15.9529	21.1178	13.6131	20.498	23.5479	22.7708	27.3762	27.6153	20.4041	14.0577	15.5752
B5XJ13	25	23	302.415	0.0030972	1.33232	35496.9	Phosphate acyltransferase OS=Streptococcus pyogenes serotype M49 (strain NZ131) OX=471876 GN=plsX PE=3 SV=1	4.83262	4.38515	4.96124	5.17082	4.56886	4.83951	4.45387	4.02608	4.49177	4.36334	4.10629	4.94352	4.97753	4.2853	4.67989	5.12341	4.88299	4.99332	5.71384	5.5935	5.97521	5.0929	4.56511	5.36142	5.23212	4.89009	5.3669	5.25857	4.48345	5.25742	4.72634	4.85973	4.32391	4.47105	4.64757	4.99991	5.76085	5.00648	5.16304	4.99981
A0A0H3C0A4	22	19	193.909	2.22044e-08	1.41127	28194.4	Phosphate import ATP-binding protein PstB OS=Streptococcus pyogenes serotype M49 (strain NZ131) OX=471876 GN=pstB PE=3 SV=1	4.37298	4.67063	4.27889	4.94273	5.16003	5.02496	5.13575	5.01351	5.35219	5.42128	5.55972	5.37993	4.61261	4.96422	4.67451	5.39716	5.83752	5.49866	6.18705	6.23877	6.02163	4.29245	4.61689	4.16215	4.8784	5.29524	4.9491	4.63147	5.17946	4.80964	4.44083	5.04257	5.16715	5.45364	4.75045	5.57778	6.14915	4.35716	5.04091	4.87352
A0A0H3C0S7	15	10	140.523	1.82688e-10	1.51091	30653	Phosphate import ATP-binding protein PstB OS=Streptococcus pyogenes serotype M49 (strain NZ131) OX=471876 GN=pstB2 PE=3 SV=1	2.46174	2.58817	2.46248	2.00452	2.29428	2.17015	2.77324	2.90631	2.87694	2.99545	2.94538	3.26446	2.4677	2.67533	2.57698	2.8061	2.72245	2.90428	2.54323	2.57214	2.69261	2.2264	2.17642	2.29671	1.95108	2.05301	2.08845	2.28647	2.22904	2.3009	2.50413	2.15632	2.85216	3.06843	2.57334	2.81094	2.60266	2.23318	2.03084	2.27214
A0A0H3BYH7	3	3	19.7776	0.458415	1.67225	33845.6	Phosphate transport system permease protein OS=Streptococcus pyogenes serotype M49 (strain NZ131) OX=471876 GN=pstC PE=3 SV=1	0.255389	0.509529	0.346064	0.303097	0.459973	0.24958	0.567645	0.406621	0.316898	0.601734	0.729526	0.362144	0.474059	0.473253	0.339695	0.491469	0.381006	0.286693	0.410632	0.346538	0.287429	0.463859	0.389264	0.241209	0.49178	0.436125	0.335424	0.444853	0.377171	0.469938	0.370327	0.33755	0.430388	0.564468	0.429002	0.38639	0.348199	0.364777	0.42111	0.430654
A0A0H3BXG5	2	2	18.6074	3.78253e-06	1.97269	31768.3	Phosphate transport system permease protein PstA OS=Streptococcus pyogenes serotype M49 (strain NZ131) OX=471876 GN=pstA PE=3 SV=1	0.718869	0.702935	0.705733	0.823346	0.778838	0.715286	0.801426	0.69313	0.817265	0.839935	0.946763	0.71527	0.674921	0.670957	0.633171	0.665291	0.609568	0.607657	0.505703	0.38276	0.379839	0.619934	0.671199	0.676936	0.714736	0.660379	0.566324	0.681859	0.649515	0.682839	0.709179	0.77249	0.770607	0.833989	0.659683	0.627505	0.422768	0.656023	0.647146	0.671404
A0A0H3BZ27	12	11	101.959	0.871716	1.18442	31031.1	Phosphate-binding protein OS=Streptococcus pyogenes serotype M49 (strain NZ131) OX=471876 GN=pstS PE=3 SV=1	2.50137	2.15398	2.92763	2.70805	2.45534	2.9513	2.80659	2.36505	3.40244	2.82369	2.51161	3.18739	2.76957	2.32632	2.8011	2.51427	2.13502	2.58976	2.51608	2.35532	2.77936	2.73615	2.22259	2.80161	2.76326	2.22323	2.83097	2.79164	2.20839	2.8397	2.52766	2.7049	2.85802	2.8409	2.63233	2.41301	2.55025	2.58678	2.60582	2.61324
A0A0H3BZ22	13	10	138.676	0.0926302	1.34718	25020.8	Phosphate-specific transport system accessory protein PhoU OS=Streptococcus pyogenes serotype M49 (strain NZ131) OX=471876 GN=phoU PE=3 SV=1	4.66502	5.07295	5.8767	4.82055	4.89074	6.23436	4.9268	4.75233	6.53085	4.6631	4.33975	6.04259	5.42386	4.96837	6.14209	6.44013	5.99351	7.39339	6.30052	6.3897	7.57864	5.39	4.70212	5.73255	5.03023	4.6542	5.79981	5.13395	4.53428	5.85168	5.20489	5.31522	5.40333	5.01515	5.51144	6.60901	6.75629	5.27489	5.16141	5.1733
B5XKG1	2	2	12.355	0.000828301	1.65502	29591.2	Phosphatidylglycerol--prolipoprotein diacylglyceryl transferase OS=Streptococcus pyogenes serotype M49 (strain NZ131) OX=471876 GN=lgt PE=3 SV=1	0.188175	0.147483	0.216446	0.165927	0.151732	0.178021	0.208626	0.137289	0.200881	0.15829	0.136294	0.207499	0.214011	0.168967	0.224351	0.264889	0.211719	0.304435	0.258846	0.253515	0.280828	0.174665	0.151231	0.192355	0.167741	0.140803	0.174969	0.173908	0.141552	0.163802	0.184035	0.165227	0.182265	0.167361	0.202443	0.260348	0.264396	0.17275	0.161171	0.159754
A0A0H3C1F2	9	6	67.572	3.93202e-11	2.08362	28283.3	Phospho-2-dehydro-3-deoxyheptonate aldolase OS=Streptococcus pyogenes serotype M49 (strain NZ131) OX=471876 GN=aroA2 PE=4 SV=1	0.576613	0.642177	0.591481	0.389129	0.448925	0.380766	0.410295	0.443936	0.406838	0.541933	0.563288	0.534942	0.65638	0.617478	0.587917	0.833446	0.897571	0.808535	0.64166	0.775121	0.669292	0.531398	0.491238	0.563886	0.43436	0.437572	0.471739	0.473702	0.439188	0.479115	0.603424	0.406273	0.420356	0.546721	0.620592	0.846517	0.695358	0.528841	0.44789	0.464002
A0A0H3C0J7	2	2	14.9058	5.22593e-05	1.80431	8947.24	Phosphocarrier protein HPr OS=Streptococcus pyogenes serotype M49 (strain NZ131) OX=471876 GN=ptsH PE=3 SV=1	1.80958	1.87507	2.18484	1.62996	1.46517	1.49973	1.52666	1.45123	1.54107	1.56356	1.28901	1.47637	2.05985	1.47896	1.95011	2.69484	2.09652	2.64835	2.1679	2.23512	2.98989	2.00075	1.54666	2.08643	1.76418	1.52226	1.85179	1.52296	1.22087	1.37947	1.9565	1.53162	1.50632	1.44298	1.82964	2.4799	2.4643	1.87795	1.71274	1.37443
A0A0H3BZC8	32	29	296.04	2.82779e-05	1.99591	106075	Phosphoenolpyruvate carboxylase OS=Streptococcus pyogenes serotype M49 (strain NZ131) OX=471876 GN=ppc PE=3 SV=1	1.22899	1.3049	1.13649	1.18676	1.5054	1.17989	1.14173	1.40035	1.06295	1.23971	1.28231	1.14233	1.2181	1.3846	1.17841	1.31951	1.56798	1.35641	0.742897	0.858337	0.720736	1.17924	1.28382	1.11691	1.21555	1.51837	1.25496	1.45774	1.66077	1.51593	1.22346	1.29068	1.20168	1.22145	1.26037	1.41464	0.77399	1.19332	1.32963	1.54481
A0A0H3BZB4	45	40	616.621	1.01014e-07	1.82791	63250.1	Phosphoenolpyruvate-protein phosphotransferase OS=Streptococcus pyogenes serotype M49 (strain NZ131) OX=471876 GN=ptsI PE=3 SV=1	42.9023	49.9547	41.0708	37.0491	44.396	38.3001	43.709	48.6012	41.297	35.7927	38.1863	35.3712	41.6015	46.2815	40.2278	64.5685	73.8438	61.4701	60.8632	73.6782	55.9917	38.2962	42.5097	38.7196	39.6761	41.9186	38.6898	38.5969	41.7209	39.3439	44.6426	39.9151	44.5358	36.45	42.7036	66.6275	63.511	39.8418	40.0948	39.8872
A0A0H3BVW6	4	3	27.0557	2.77815e-09	1.7597	19725.1	Phosphoesterase OS=Streptococcus pyogenes serotype M49 (strain NZ131) OX=471876 GN=Spy49_0299 PE=3 SV=1	1.09398	1.19057	1.11465	1.29232	1.54311	1.29587	1.0953	1.01799	1.02105	1.1675	1.14571	1.11177	0.967715	1.02285	0.989508	1.11997	1.10244	1.10158	1.75018	1.76936	1.72448	1.1733	1.2372	1.14094	1.28242	1.39923	1.17994	1.02624	1.19755	1.09659	1.13307	1.3771	1.04478	1.14166	0.993357	1.10799	1.74801	1.18381	1.2872	1.1068
A0A0H3BZ11	48	41	632.378	5.44009e-13	1.71528	63256.4	Phosphoglucomutase OS=Streptococcus pyogenes serotype M49 (strain NZ131) OX=471876 GN=pgmA PE=3 SV=1	19.0174	18.8882	19.5043	15.4051	14.738	14.8861	19.5369	18.445	19.048	17.7785	16.2663	17.4603	18.3008	16.8624	17.2639	23.3584	22.611	21.5375	26.3572	25.633	25.2477	17.5381	17.6552	16.9916	16.8083	15.8819	16.4072	16.5077	14.9641	16.3824	19.1366	15.0098	19.01	17.1683	17.4757	22.5023	25.746	17.395	16.3658	15.9514
A0A0H3BZI3	33	31	305.18	1.89731e-08	1.74931	63584.9	Phosphoglucomutase/phosphomannomutase family protein OS=Streptococcus pyogenes serotype M49 (strain NZ131) OX=471876 GN=Spy49_1159c PE=3 SV=1	4.33323	4.48453	5.01437	3.28926	3.24812	3.7137	4.17429	3.93269	4.82255	5.30241	5.00823	6.06909	4.52812	4.56885	5.29773	4.837	4.71696	5.28567	5.63932	5.85724	6.43577	4.5495	4.27469	4.66502	3.46566	3.33088	3.59309	3.38727	3.42898	3.55792	4.61071	3.41702	4.30984	5.45991	4.79823	4.94654	5.97744	4.49641	3.46321	3.45806
A0A0H3BYP4	22	21	326.161	0.155099	1.19014	48380.8	Phosphoglucosamine mutase OS=Streptococcus pyogenes serotype M49 (strain NZ131) OX=471876 GN=glmM PE=3 SV=1	15.2611	16.2816	14.3028	15.5303	17.8442	14.6858	15.5839	16.5511	14.2805	15.0308	15.2128	13.2434	14.223	15.149	14.1764	15.8972	17.566	15.0148	17.4316	18.2498	16.0743	14.8715	16.0635	14.3501	14.8002	16.6358	14.6294	15.7324	16.9623	15.3101	15.2818	16.0201	15.4719	14.4957	14.5161	16.1593	17.2519	15.095	15.3551	16.0016
B5XIF1	35	34	527.936	6.00722e-06	1.34619	42114	Phosphoglycerate kinase OS=Streptococcus pyogenes serotype M49 (strain NZ131) OX=471876 GN=pgk PE=3 SV=1	78.7531	83.5604	85.6683	88.2541	91.8041	92.8161	82.8497	82.9077	86.5067	70.8498	69.9971	77.4265	80.3187	74.3621	82.1994	82.63	79.722	89.7209	82.8571	81.6454	92.4311	90.5795	87.0824	92.3642	96.7809	93.5523	98.4617	98.2821	91.9796	103.575	82.6606	90.9581	84.088	72.7578	78.9601	84.0243	85.6445	90.0087	96.265	97.9456
A0A0H3BYE5	14	10	129.296	0.825541	1.19968	26833.2	Phosphoglycerate mutase family OS=Streptococcus pyogenes serotype M49 (strain NZ131) OX=471876 GN=Spy49_1379c PE=4 SV=1	2.71895	2.58989	3.36973	2.97041	2.72836	3.85257	3.06582	2.68413	3.83563	3.02618	2.50498	3.57653	2.84951	2.39542	3.2448	2.82877	2.30849	3.14725	3.17196	2.896	3.79345	3.3002	2.78729	3.47823	3.35677	2.9493	3.63272	3.16359	2.64119	3.4303	2.89286	3.18378	3.19519	3.0359	2.82991	2.76151	3.28714	3.18857	3.31293	3.07836
A0A0H3BWF9	10	9	102.367	9.0349e-06	2.25292	23538	Phosphoglycerate mutase OS=Streptococcus pyogenes serotype M49 (strain NZ131) OX=471876 GN=Spy49_0505c PE=4 SV=1	1.45408	1.70059	1.34319	1.56214	1.8454	1.41242	1.75667	2.05711	1.51641	1.67262	1.8054	1.50844	1.33285	1.52477	1.33974	1.30617	1.60236	1.30801	0.839494	0.966295	0.808487	1.43041	1.62573	1.3565	1.58319	1.85466	1.57345	1.87194	2.2038	1.814	1.49929	1.60666	1.77673	1.66216	1.39912	1.40551	0.871425	1.47088	1.67043	1.96325
A0A0H3BWP1	22	22	229.936	5.78923e-05	1.58978	83121.4	Phosphoglycerol transferase OS=Streptococcus pyogenes serotype M49 (strain NZ131) OX=471876 GN=Spy49_0632c PE=3 SV=1	2.84408	3.45238	3.23001	3.73959	4.31544	5.15006	3.97006	4.05239	4.885	3.37962	3.61785	4.2115	3.18792	3.39623	3.72955	4.28383	4.43588	4.95445	3.27893	3.73065	3.38887	3.05208	3.10771	3.39718	3.41105	3.49568	3.78265	2.75664	2.79397	3.05068	3.17549	4.4017	4.30249	3.73632	3.4379	4.55805	3.46615	3.18566	3.56313	2.8671
A0A0H3BYU8	6	6	48.0139	0.00148074	1.69161	28350.9	Phosphomethylpyrimidine kinase OS=Streptococcus pyogenes serotype M49 (strain NZ131) OX=471876 GN=thiD PE=3 SV=1	0.438537	0.472008	0.629271	0.437151	0.531259	0.500497	0.508163	0.572455	0.618194	0.580902	0.571542	0.636927	0.605037	0.605878	0.645744	0.643657	0.501922	0.660262	0.782219	0.845977	0.856625	0.575361	0.438098	0.554813	0.501693	0.454274	0.640057	0.570598	0.419195	0.614809	0.513272	0.489636	0.56627	0.596457	0.618886	0.601947	0.828273	0.522757	0.532008	0.534867
B5XMB5	6	5	57.3059	0.000402898	1.49361	18629.4	Phosphopantetheine adenylyltransferase OS=Streptococcus pyogenes serotype M49 (strain NZ131) OX=471876 GN=coaD PE=3 SV=1	1.68573	2.21899	1.81123	1.79304	2.10235	1.83887	2.03413	2.29768	1.96006	2.29826	2.67648	2.08249	2.01877	2.26254	1.88211	2.58121	2.84079	2.33991	2.50466	2.76962	2.1779	1.73568	1.77463	1.68643	1.71453	1.90244	1.72925	2.11792	2.12841	1.93753	1.90532	1.91142	2.09729	2.35241	2.05447	2.5873	2.48406	1.73225	1.78207	2.06129
A0A0H3BXF4	4	4	43.0216	0.00766924	1.57071	19500.8	Phosphopantothenoylcysteine decarboxylase OS=Streptococcus pyogenes serotype M49 (strain NZ131) OX=471876 GN=dfp PE=4 SV=1	1.36806	1.32358	1.71666	1.53712	1.46685	1.66979	1.57413	1.29921	1.72389	1.44542	1.38781	1.70058	1.47525	1.26658	1.48482	1.7284	1.54969	1.93732	2.19816	1.83621	2.6045	1.51353	1.25481	1.59351	1.76672	1.46502	1.70161	1.57112	1.4432	1.71196	1.46943	1.55792	1.53241	1.51127	1.40889	1.73847	2.21295	1.45395	1.64445	1.57543
A0A0H3C0R9	13	12	128.736	9.29575e-09	1.63194	25868.7	Phosphopantothenoylcysteine synthetase OS=Streptococcus pyogenes serotype M49 (strain NZ131) OX=471876 GN=dpfB PE=4 SV=1	1.52086	1.63673	1.67408	1.63325	1.7776	1.93142	1.71872	1.78689	2.07547	1.56038	1.61985	1.86059	1.82134	1.91424	1.87157	2.18515	2.22846	2.40021	2.396	2.4685	2.46927	1.52485	1.61032	1.57177	1.43127	1.56849	1.49415	1.59149	1.56224	1.59707	1.61056	1.78076	1.86036	1.68027	1.86905	2.27127	2.44459	1.56898	1.49797	1.5836
B5XL08	27	21	353.681	2.0639e-06	1.7888	44391.8	Phosphopentomutase OS=Streptococcus pyogenes serotype M49 (strain NZ131) OX=471876 GN=deoB PE=3 SV=1	16.399	15.5418	17.8122	14.1153	12.6276	15.2113	14.92	12.7598	15.9085	26.0727	21.5636	27.4111	18.7271	15.9933	18.4992	20.7613	17.5194	20.8838	23.4616	21.5645	25.8476	17.8437	17.1894	19.3155	15.2688	13.1821	15.9464	15.5669	12.1285	15.7167	16.5843	13.9847	14.5294	25.0158	17.7399	19.7215	23.6246	18.1162	14.7991	14.4707
A0A0H3BWD6	17	14	189.962	4.88498e-15	2.08946	28046.9	Phosphoribosylaminoimidazole-succinocarboxamide synthase OS=Streptococcus pyogenes serotype M49 (strain NZ131) OX=471876 GN=purC PE=3 SV=1	4.28565	3.9055	4.3583	4.26988	4.8697	4.70246	2.53012	2.5723	2.72195	2.30916	2.33305	2.46637	3.81106	3.78922	3.90327	4.57113	4.43204	4.79373	4.42411	4.49773	4.80529	4.50544	4.33525	4.80024	4.8174	4.81229	4.94183	5.09533	4.80125	4.95652	4.18315	4.61401	2.60812	2.36952	3.83452	4.59896	4.57571	4.54698	4.85717	4.95103
B5XJ18	13	10	102.493	1.08988e-09	2.4835	36671.2	Phosphoribosylformylglycinamidine cyclo-ligase OS=Streptococcus pyogenes serotype M49 (strain NZ131) OX=471876 GN=purM PE=3 SV=1	0.820923	0.714245	0.783377	0.860404	0.884169	0.722844	0.827507	0.945438	0.703823	0.983647	0.946434	0.858171	0.969157	0.904595	0.963614	1.21073	1.34938	1.12459	0.559167	0.52702	0.569252	0.935152	0.959407	0.920092	0.961269	1.05688	0.939163	1.39229	1.4257	1.29328	0.772849	0.822472	0.825589	0.929417	0.945789	1.22823	0.551813	0.938217	0.985771	1.37043
A0A0H3BWZ0	10	8	74.9008	8.58934e-08	3.70566	137127	Phosphoribosylformylglycinamidine synthase_ synthetase subunit/Phosphoribosylformylglycinamidine synthase_ glutamine amidotransferase subunit OS=Streptococcus pyogenes serotype M49 (strain NZ131) OX=471876 GN=purL PE=4 SV=1	0.118502	0.100586	0.152198	0.148458	0.125271	0.227804	0.145891	0.122813	0.171482	0.0986848	0.109125	0.160697	0.174041	0.147529	0.202887	0.396817	0.330673	0.484535	0.33339	0.306231	0.450397	0.123233	0.0914346	0.13964	0.119549	0.0797081	0.127817	0.116422	0.0835742	0.128233	0.123762	0.167178	0.146728	0.122836	0.174819	0.404008	0.363339	0.118102	0.109025	0.10941
A0A0H3BYP6	37	29	378.27	0.00175074	1.40806	58136	PIN_8 domain-containing protein OS=Streptococcus pyogenes serotype M49 (strain NZ131) OX=471876 GN=Spy49_0030 PE=4 SV=1	3.29291	3.13666	3.60327	3.40387	3.03631	3.73797	2.61236	2.40629	2.94712	2.68203	2.43979	2.9454	3.23362	2.76088	3.28928	3.13188	2.77155	3.37809	3.32258	3.06133	4.06721	3.72221	3.32943	3.87424	3.68716	3.59344	3.93567	4.07421	3.33714	3.56317	3.34428	3.39272	2.65526	2.68907	3.09459	3.09384	3.48371	3.64196	3.73875	3.65817
A0A0H3BY86	3	3	18.3076	8.1266e-11	1.6402	23401.1	Platelet activating factor_ putative OS=Streptococcus pyogenes serotype M49 (strain NZ131) OX=471876 GN=Spy49_0868 PE=4 SV=1	0.206328	0.217481	0.211061	0.303987	0.308334	0.290294	0.243916	0.284025	0.281149	0.294468	0.303899	0.316381	0.300807	0.308059	0.301337	0.292674	0.293435	0.288534	0.173105	0.206251	0.178347	0.235695	0.25571	0.246051	0.257545	0.253941	0.259214	0.263773	0.276064	0.273649	0.211623	0.300872	0.269697	0.304916	0.303401	0.291548	0.185901	0.245819	0.2569	0.271162
B5XIK4	44	36	480.224	0.0646629	1.55296	77437.8	Polyribonucleotide nucleotidyltransferase OS=Streptococcus pyogenes serotype M49 (strain NZ131) OX=471876 GN=pnp PE=3 SV=1	10.7707	12.21	9.45407	11.3553	14.1649	9.01308	13.35	15.3044	10.2183	14.5204	16.0709	11.2313	11.158	12.3967	9.48476	11.5241	13.4736	9.93567	9.49343	11.4192	8.11968	10.2918	11.6303	9.38664	10.8153	12.5121	10.0875	14.7768	16.5374	13.7718	10.8116	11.5111	12.9575	13.9409	11.0132	11.6445	9.67744	10.4362	11.1383	15.0287
A0A0H3BX61	9	9	103.984	1.59166e-09	3.29005	36630.3	Polysaccharide deacetylase family protein OS=Streptococcus pyogenes serotype M49 (strain NZ131) OX=471876 GN=Spy49_0850c PE=4 SV=1	4.69172	5.26475	4.33617	3.35729	4.08981	3.08206	3.96984	4.28619	3.41658	3.73818	3.93846	3.42069	3.96476	4.53854	3.95447	4.33772	4.87354	4.20664	7.10787	7.73228	6.13168	4.3841	4.85696	3.96352	2.799	3.31175	2.72884	2.02546	2.28388	2.06498	4.76421	3.50972	3.89087	3.69911	4.15259	4.47264	6.99061	4.40153	2.94653	2.12477
A0A0H3BXQ8	21	18	191.954	1.58579e-07	1.97976	48377.4	Polysaccharide deacetylase family protein OS=Streptococcus pyogenes serotype M49 (strain NZ131) OX=471876 GN=Spy49_1092c PE=4 SV=1	2.49055	2.74236	2.84598	3.01676	3.19924	3.82361	2.93978	2.83713	3.52438	2.51258	2.50495	2.92054	3.09238	3.1953	3.36386	3.7954	3.73822	3.98001	3.29308	3.82478	3.57379	2.80263	2.62294	2.98035	2.49191	2.44174	2.77448	1.95207	1.74859	2.11502	2.69296	3.34654	3.10043	2.64602	3.21718	3.83787	3.56388	2.80198	2.56938	1.93856
A0A0H3BWU7	13	13	130.049	0.0474362	1.34008	25088.1	Potassium uptake protein_ Trk family OS=Streptococcus pyogenes serotype M49 (strain NZ131) OX=471876 GN=Spy49_0273c PE=4 SV=1	2.92623	3.22087	2.57355	3.0226	3.4166	2.52975	3.4657	3.82006	2.96755	3.63443	3.96647	3.07467	3.06957	3.2583	2.61981	2.99102	3.21394	2.76712	2.61846	2.95362	2.53108	2.62344	2.87913	2.46382	2.73513	3.01718	2.6001	3.08358	3.35719	2.97927	2.90688	2.98965	3.41777	3.55852	2.98256	2.9907	2.70105	2.65546	2.78414	3.14001
A0A0H3C112	6	5	47.8158	1.76168e-05	1.41302	11267.2	Predicted nucleic-acid-binding protein OS=Streptococcus pyogenes serotype M49 (strain NZ131) OX=471876 GN=Spy49_1339c PE=4 SV=1	1.84697	1.7613	1.87862	1.68461	1.66627	1.70247	1.68913	1.55438	1.48911	1.60594	1.54681	1.51361	1.90353	1.97684	1.79266	2.09127	2.15198	2.19867	1.41935	1.37795	1.76166	1.76499	1.76439	1.57142	1.62162	1.77606	1.60754	1.70032	1.64085	1.54614	1.82896	1.68445	1.57754	1.55545	1.89101	2.14731	1.51965	1.70027	1.66841	1.6291
A0A0H3C065	2	2	23.8844	0.0406799	1.19413	6849.15	Preprotein translocase subunit SecE OS=Streptococcus pyogenes serotype M49 (strain NZ131) OX=471876 GN=Spy49_1704c PE=4 SV=1	0.995024	1.00213	0.942709	0.873082	0.926543	0.713504	0.934797	0.993132	0.886186	0.914136	1.06359	0.973858	0.873654	0.828189	0.799872	0.915701	0.766532	0.82169	0.761857	0.846491	0.863392	0.966015	0.837265	0.881024	0.912484	0.844568	0.897055	0.952927	0.845366	1.01723	0.979954	0.83771	0.938039	0.983862	0.833905	0.834641	0.823914	0.894768	0.884702	0.938508
A0A0H3C0I3	5	5	53.5925	0.000690426	1.74952	13423.4	Preprotein translocase subunit YajC OS=Streptococcus pyogenes serotype M49 (strain NZ131) OX=471876 GN=Spy49_1624c PE=3 SV=1	4.11039	4.24837	4.50065	5.17463	5.71897	7.90726	5.13574	5.32208	7.38285	3.82421	4.35816	5.26727	4.17078	4.46461	5.50793	3.57564	3.99897	4.65609	4.79919	5.30319	5.73208	4.84082	4.36557	5.64548	5.9772	6.20176	7.13564	6.73002	6.94986	7.71801	4.28647	6.26695	5.94689	4.48321	4.71444	4.0769	5.27816	4.95062	6.4382	7.13263
A0A0H3C0W7	11	8	81.8321	0.000253756	1.28599	90910.8	Primosomal protein N' OS=Streptococcus pyogenes serotype M49 (strain NZ131) OX=471876 GN=priA PE=3 SV=1	0.428304	0.465685	0.485382	0.490084	0.523961	0.522885	0.517152	0.520911	0.548812	0.521121	0.501579	0.590552	0.436715	0.422629	0.462843	0.458159	0.446516	0.464457	0.394193	0.403317	0.471828	0.503635	0.481513	0.50273	0.517283	0.522535	0.592538	0.537723	0.489587	0.55957	0.45979	0.51231	0.528958	0.537751	0.440729	0.456377	0.423113	0.495959	0.544119	0.52896
B5XKL2	7	4	60.4227	3.26767e-09	3.01686	33958	Probable cell division protein WhiA OS=Streptococcus pyogenes serotype M49 (strain NZ131) OX=471876 GN=whiA PE=3 SV=1	0.368501	0.399271	0.341471	0.389815	0.431374	0.346843	0.352281	0.49743	0.389165	0.535343	0.524445	0.486003	0.46643	0.442855	0.456331	0.829614	1.01291	0.83292	0.358537	0.461769	0.312509	0.353086	0.436977	0.360902	0.263263	0.339822	0.283747	0.431225	0.450495	0.427371	0.369747	0.389344	0.412958	0.515263	0.455205	0.891816	0.377605	0.383655	0.29561	0.436364
A0A0H3BZT2	5	5	59.406	2.99633e-08	1.682	23561.2	Probable DNA-directed RNA polymerase subunit delta OS=Streptococcus pyogenes serotype M49 (strain NZ131) OX=471876 GN=rpoE PE=3 SV=1	5.60836	5.65327	6.13974	5.60567	5.90485	6.5696	5.63585	5.25399	6.36461	5.29218	4.97691	5.6823	5.90684	5.55352	6.43346	8.2835	7.61634	8.61018	8.83916	8.09939	9.50336	5.76689	5.63182	5.74332	5.75742	5.03682	5.79269	5.33816	5.07575	5.30657	5.80046	6.0267	5.75148	5.31713	5.96461	8.17001	8.81397	5.71401	5.52898	5.24016
B5XMB1	11	9	88.8072	1.88738e-15	2.32265	41509.4	Probable dual-specificity RNA methyltransferase RlmN OS=Streptococcus pyogenes serotype M49 (strain NZ131) OX=471876 GN=rlmN PE=3 SV=1	0.901867	0.955636	0.923593	0.697418	0.709115	0.661752	0.828556	0.761274	0.776046	0.908032	0.961825	0.833738	0.875187	0.810111	0.834109	1.55294	1.4381	1.46425	1.25426	1.14483	1.24646	0.785819	0.796984	0.756761	0.715465	0.683317	0.671282	0.667727	0.610371	0.6401	0.927032	0.689428	0.788625	0.901198	0.839802	1.4851	1.21518	0.779855	0.690021	0.639399
B5XL04	16	14	149.254	2.05613e-12	1.98195	22506.7	Probable GTP-binding protein EngB OS=Streptococcus pyogenes serotype M49 (strain NZ131) OX=471876 GN=engB PE=3 SV=1	3.04207	3.19144	3.2827	3.03512	3.2661	2.95971	3.05738	3.21214	3.19675	2.97973	3.18718	2.95738	3.96701	3.49904	3.64445	5.36827	5.12927	5.29723	4.43077	4.70401	4.91565	3.05569	2.84707	3.20186	2.77418	2.43764	2.75748	2.94149	2.63234	2.84252	3.17207	3.08698	3.15542	3.04143	3.7035	5.26492	4.68348	3.03487	2.65643	2.80545
B5XJY9	16	13	212.206	0.561294	1.21447	33632.9	Probable manganese-dependent inorganic pyrophosphatase OS=Streptococcus pyogenes serotype M49 (strain NZ131) OX=471876 GN=ppaC PE=3 SV=1	24.3371	23.5155	27.8019	24.7938	24.5203	28.9022	22.3687	19.6695	27.139	21.031	19.0774	27.8271	24.4182	21.6326	26.2834	24.1606	20.0241	27.6348	22.005	20.9533	27.802	27.3598	23.7515	29.302	26.0791	23.8063	28.9291	28.156	24.6657	29.6839	25.2182	26.0721	23.0591	22.6452	24.1114	23.9398	23.5868	26.8044	26.2715	27.5019
A0A0H3BWT6	6	6	65.4139	0.000892844	1.19459	24514.4	Probable nicotinate-nucleotide adenylyltransferase OS=Streptococcus pyogenes serotype M49 (strain NZ131) OX=471876 GN=nadD PE=3 SV=1	2.29803	2.46594	2.47876	2.41212	2.72724	2.76995	2.54729	2.52917	2.69629	2.84062	2.63131	3.03453	2.39799	2.4369	2.54099	2.73246	2.68282	2.84423	2.44763	2.63871	2.65224	2.40137	2.34413	2.37529	2.58195	2.70399	2.68231	2.70671	2.68605	2.71064	2.41424	2.63644	2.59091	2.83548	2.45863	2.75317	2.57953	2.3736	2.65609	2.70114
A0A0H3C026	4	4	36.2195	2.55573e-11	2.10088	36804.3	Probable regulatory protein OS=Streptococcus pyogenes serotype M49 (strain NZ131) OX=471876 GN=Spy49_0669 PE=4 SV=1	3.22298	3.31805	3.49422	2.67491	2.40975	2.73853	3.18988	3.36125	3.51003	4.72659	4.78298	5.4356	3.58877	3.24061	3.45269	4.40722	4.13274	4.30982	5.38741	5.45025	5.5979	3.37881	2.89423	3.25229	3.01121	2.591	3.08659	2.78839	2.38918	2.87519	3.34508	2.60773	3.35372	4.98172	3.42736	4.28326	5.47852	3.17511	2.89627	2.68425
B5XMM1	10	10	154.364	0	4.15707	23329	Probable transaldolase OS=Streptococcus pyogenes serotype M49 (strain NZ131) OX=471876 GN=tal PE=3 SV=1	3.53033	3.73564	3.75311	1.92131	1.99865	2.09684	4.3736	4.38783	4.71055	8.1322	8.02567	8.85438	4.05239	4.2	4.28691	2.73373	2.82569	2.8951	3.64273	3.77208	3.65673	4.10332	4.10223	4.05625	2.16291	2.15271	2.2058	2.52194	2.44383	2.66494	3.67303	2.0056	4.49066	8.33742	4.17977	2.81818	3.69051	4.08727	2.17381	2.54357
B5XJU2	15	15	191.06	0.187676	1.32608	25887.9	Probable transcriptional regulatory protein Spy49_0265 OS=Streptococcus pyogenes serotype M49 (strain NZ131) OX=471876 GN=Spy49_0265 PE=3 SV=1	14.0573	14.0435	16.6686	14.7737	13.8397	18.7984	11.9079	10.8596	15.4291	11.6186	11.1724	15.483	13.7532	12.7745	16.0789	14.3623	12.6074	16.9795	15.2693	14.416	18.4419	16.4385	14.1867	17.3354	17.1829	15.0387	18.4302	15.6754	14.1286	17.1867	14.9231	15.8039	12.7322	12.758	14.2022	14.6498	16.0424	15.9868	16.8839	15.6636
B5XKV0	15	13	146.365	0.000112907	1.64885	44896.8	Probable tRNA sulfurtransferase OS=Streptococcus pyogenes serotype M49 (strain NZ131) OX=471876 GN=thiI PE=3 SV=1	2.25809	2.58421	2.1006	1.76233	2.1196	1.53979	2.21642	2.44984	1.90727	2.00116	2.27365	1.89357	2.08718	2.35169	1.98208	2.8063	3.09973	2.62334	1.70315	1.98217	1.59761	1.91848	2.06968	1.75653	1.64807	1.88409	1.64078	1.70836	1.87634	1.71909	2.3143	1.80724	2.19118	2.05613	2.14032	2.84312	1.76098	1.9149	1.72431	1.76793
B5XIL5	49	41	565.109	0.476781	1.19274	68799.1	Proline--tRNA ligase OS=Streptococcus pyogenes serotype M49 (strain NZ131) OX=471876 GN=proS PE=3 SV=1	7.77879	7.71424	9.29333	9.57874	9.24138	10.7436	9.17702	8.11817	10.9601	8.05225	7.08091	9.84026	8.39535	7.87254	9.03769	9.41504	8.6025	10.1282	9.01875	8.67327	10.3637	9.51532	8.38386	9.83639	9.57021	8.3829	10.4964	8.94973	8.12074	9.89399	8.26212	9.85457	9.41844	8.32447	8.4352	9.3819	9.3519	9.24519	9.48315	8.98815
B5XJV3	5	4	48.5689	0.00021986	2.06313	32789.3	Protease HtpX homolog OS=Streptococcus pyogenes serotype M49 (strain NZ131) OX=471876 GN=htpX PE=3 SV=1	1.27387	1.08099	1.26987	1.20993	1.38071	1.73373	1.26527	1.33898	1.72623	1.60407	1.46518	2.06965	1.28004	0.913503	1.14388	0.905711	0.614311	0.970801	0.784867	0.729454	1.01153	1.25995	1.0887	1.26278	1.17691	1.06956	1.4146	1.4353	1.41578	1.40056	1.20825	1.44146	1.4435	1.71297	1.11247	0.830274	0.841949	1.20381	1.22036	1.41721
A0A0H3BZ70	6	6	39.1693	0.752615	1.23454	48170.9	Protein DltD OS=Streptococcus pyogenes serotype M49 (strain NZ131) OX=471876 GN=dltD PE=3 SV=1	3.27354	4.11506	3.25075	3.81886	4.94601	2.73403	3.46025	3.94379	2.37886	3.25427	3.56014	2.49989	3.8362	3.52861	2.85859	3.84623	3.50675	2.90282	3.52408	4.00409	3.50263	3.16612	2.97397	3.42835	4.09141	3.61644	3.57281	4.05621	3.63374	3.65366	3.54645	3.83296	3.26097	3.10476	3.4078	3.4186	3.67693	3.18948	3.76022	3.78121
A0A0H3BZD9	11	8	115.537	5.00739e-05	1.50631	22067.6	Protein GrpE OS=Streptococcus pyogenes serotype M49 (strain NZ131) OX=471876 GN=grpE PE=3 SV=1	11.8445	11.7611	12.3155	15.9776	16.1952	17.0927	12.4518	11.706	14.1414	13.4393	12.6212	14.751	11.1973	9.92661	11.5822	15.8118	13.4035	15.6319	15.2154	14.7285	15.3547	14.2152	11.7087	13.4174	15.4794	14.08	15.9665	15.25	13.1551	16.2254	11.9737	16.4219	12.7664	13.6038	10.902	14.949	15.0995	13.1137	15.1753	14.8768
P0C096	31	25	400.334	0.00484752	1.52317	40615.3	Protein RecA OS=Streptococcus pyogenes serotype M49 (strain NZ131) OX=471876 GN=recA PE=3 SV=2	13.6529	12.456	15.6476	20.9487	16.9626	23.9546	16.4903	14.7637	19.1158	14.5818	13.4095	17.5278	17.0223	15.1553	18.3138	16.2818	13.7891	16.5806	15.5131	12.726	16.8324	17.8531	14.908	17.8061	19.8887	18.2548	20.4512	22.2364	18.0822	23.2838	13.9189	20.622	16.7899	15.173	16.8304	15.5505	15.0238	16.8557	19.5316	21.2008
B5XI23	72	62	864.198	0.0936172	1.22154	94975.9	Protein translocase subunit SecA OS=Streptococcus pyogenes serotype M49 (strain NZ131) OX=471876 GN=secA PE=3 SV=1	13.251	12.1872	13.5456	13.056	13.135	12.0726	13.7522	13.345	13.8188	15.0559	13.1165	15.8239	12.9942	11.7275	13.2652	16.6536	13.9683	15.7807	15.4392	12.1608	16.6145	13.6097	12.8036	14.0254	13.0341	11.4908	13.7866	15.1347	12.8682	14.1818	12.9946	12.7545	13.6387	14.6654	12.6623	15.4675	14.7382	13.4795	12.7705	14.0616
A0A0H3BWF1	7	7	78.2903	1.80281e-06	1.59671	47692.5	Protein translocase subunit SecY OS=Streptococcus pyogenes serotype M49 (strain NZ131) OX=471876 GN=secY PE=3 SV=1	3.82301	4.41369	3.67484	3.14701	3.81638	3.17924	3.78033	3.82617	3.58217	3.71252	4.17496	3.37188	3.74602	4.09636	3.5702	4.45551	4.747	4.4034	5.05619	5.50456	5.17232	3.21418	3.55118	3.35902	3.22334	3.50523	3.12488	3.30245	3.70909	3.33502	3.97051	3.38088	3.72956	3.75312	3.80419	4.5353	5.24436	3.3748	3.28448	3.44885
A0A0H3BXS5	2	2	36.3372	0.000700173	1.525	8741.51	Protein-export membrane protein SecG OS=Streptococcus pyogenes serotype M49 (strain NZ131) OX=471876 GN=Spy49_0421 PE=3 SV=1	4.19467	4.5436	4.66103	3.941	4.33517	5.41498	4.61845	4.6522	5.58701	4.56999	4.41057	6.27252	5.36292	5.25252	5.58603	5.5502	5.26215	6.04157	6.00972	6.50145	6.75052	4.25723	3.92845	4.44496	4.06981	4.08331	4.59857	4.50833	4.36477	4.80986	4.46643	4.56372	4.95255	5.08436	5.40049	5.61797	6.42056	4.21021	4.25057	4.56099
A0A0H3BXH8	14	14	157.715	0.0295122	1.41129	27222.7	Pseudouridine synthase OS=Streptococcus pyogenes serotype M49 (strain NZ131) OX=471876 GN=rluB PE=3 SV=1	3.36016	3.51625	2.81561	3.07829	3.10413	2.76668	2.77173	2.9138	2.61901	3.30367	2.53996	2.71271	2.86225	3.34551	2.83809	3.88593	3.86435	3.14274	3.51446	3.79835	2.8088	2.90441	3.32983	2.80435	2.65217	3.07221	2.55702	2.5174	2.84608	2.35503	3.23067	2.98303	2.76818	2.85212	3.01528	3.63101	3.37387	3.01286	2.76047	2.57284
A0A0H3C0Z9	2	2	12.7937	0.000506475	1.84042	27391.7	Pseudouridine synthase OS=Streptococcus pyogenes serotype M49 (strain NZ131) OX=471876 GN=rsuA PE=3 SV=1	0.375688	0.37825	0.32052	0.280356	0.322101	0.226068	0.32841	0.387399	0.267683	0.350973	0.354225	0.286016	0.339218	0.418558	0.294766	0.462862	0.473102	0.394036	0.224282	0.283434	0.214944	0.254881	0.323082	0.253906	0.253186	0.266523	0.224169	0.315989	0.330028	0.268014	0.358153	0.276175	0.327831	0.330405	0.350847	0.443333	0.240887	0.27729	0.247959	0.304677
A0A0H3BXS3	9	7	77.7081	0.00745336	1.58411	32733	Pseudouridine synthase OS=Streptococcus pyogenes serotype M49 (strain NZ131) OX=471876 GN=Spy49_0648 PE=3 SV=1	0.919511	0.792857	1.00311	0.870715	0.768479	0.867875	0.830628	0.70912	0.966865	0.67247	0.550799	0.70496	0.952938	0.775491	0.94725	1.07622	0.869492	1.10881	0.760856	0.693704	0.808716	0.897021	0.880864	0.986598	0.829393	0.718607	0.917114	0.824614	0.64937	0.801704	0.905159	0.83569	0.835538	0.642743	0.891893	1.01818	0.754426	0.921495	0.821705	0.758563
A0A0H3C071	3	3	26.3873	2.73985e-06	1.92614	38410.7	Pseudouridine synthase OS=Streptococcus pyogenes serotype M49 (strain NZ131) OX=471876 GN=Spy49_1709 PE=3 SV=1	0.631137	0.675298	0.566784	0.787608	0.811309	0.66625	0.721981	0.725668	0.580033	0.499185	0.50086	0.407635	0.599986	0.647446	0.548409	0.727989	0.718495	0.625304	0.4086	0.408077	0.359335	0.572798	0.624881	0.529119	0.620359	0.646579	0.583504	0.604243	0.637704	0.591894	0.624406	0.755056	0.675894	0.469227	0.598614	0.690596	0.392004	0.575599	0.616814	0.61128
A0A0H3BWC5	2	2	14.4402	1.34821e-10	2.53794	10440.2	PspC domain-containing protein OS=Streptococcus pyogenes serotype M49 (strain NZ131) OX=471876 GN=Spy49_0493 PE=4 SV=1	0.923104	0.752747	1.04488	2.1185	2.4315	2.35506	1.95783	2.14274	2.16074	1.78173	1.56547	2.06934	1.34466	1.36833	1.33129	2.37539	2.05564	2.46228	1.04737	0.947543	1.18168	1.59418	1.49649	1.69415	1.77836	1.8111	1.81654	1.94652	1.84143	2.12691	0.906911	2.30169	2.0871	1.80551	1.3481	2.29777	1.05887	1.59494	1.802	1.97162
A0A0H3BZL9	30	28	472.397	1.30163e-12	2.18569	67144.9	PTS system_ fructose-specific IIABC component OS=Streptococcus pyogenes serotype M49 (strain NZ131) OX=471876 GN=fruA PE=4 SV=1	51.4191	47.5828	49.5242	31.9078	28.8169	27.1288	40.763	35.2614	36.4647	29.7435	28.842	29.671	48.8429	42.2627	43.5756	59.8525	51.1296	55.4322	65.5802	61.6488	64.7912	39.162	35.9759	38.5966	33.5428	29.5251	30.418	34.5874	32.7999	36.1889	49.5087	29.2845	37.4964	29.4188	44.8937	55.4714	64.0068	37.9115	31.162	34.5254
A0A0H3C1P3	11	10	85.8913	0	6.31927	78265.7	PTS system_ glucose-specific IIBC component OS=Streptococcus pyogenes serotype M49 (strain NZ131) OX=471876 GN=Spy49_1636c PE=4 SV=1	0.845217	0.966669	0.946812	0.264943	0.26451	0.268952	1.30404	1.37511	1.34927	1.71704	1.62657	1.70173	1.01227	0.931427	1.01641	0.566788	0.552821	0.557165	0.461979	0.413784	0.478413	0.714002	0.73787	0.719767	0.294438	0.26142	0.291489	0.50411	0.471939	0.496398	0.919566	0.266135	1.3428	1.68178	0.986704	0.558925	0.451392	0.723879	0.282449	0.490816
A0A0H3BX78	3	3	19.7905	6.66134e-16	18.6921	17532.1	PTS system_ IIA component OS=Streptococcus pyogenes serotype M49 (strain NZ131) OX=471876 GN=Spy49_0155 PE=4 SV=1	0.138953	0.181544	0.169808	0.0375956	0.0343655	0.0327508	0.293794	0.284552	0.279818	0.679439	0.712289	0.565559	0.271989	0.284667	0.239622	0.107429	0.106248	0.0977939	0.121652	0.122805	0.114876	0.285156	0.274675	0.220844	0.0666174	0.0626391	0.0579766	0.0802461	0.0747621	0.0895735	0.163435	0.034904	0.286055	0.652429	0.265426	0.103824	0.119778	0.260225	0.062411	0.0815272
A0A0H3BWK0	5	4	52.8227	0	7.64449	9882.39	PTS system_ IIB component OS=Streptococcus pyogenes serotype M49 (strain NZ131) OX=471876 GN=Spy49_0154 PE=4 SV=1	0.742807	0.67597	0.753875	0.427655	0.424985	0.541607	1.40502	1.51691	1.70306	3.51564	3.53988	3.60278	1.06656	1.13751	1.26669	0.499844	0.426681	0.577687	0.51715	0.465714	0.564758	1.21891	1.26648	1.32085	0.557487	0.629738	0.657198	1.06878	1.28311	1.19775	0.724217	0.464749	1.54166	3.55277	1.15692	0.501404	0.515874	1.26875	0.614808	1.18321
A0A0H3BYQ9	19	14	216.246	2.13163e-14	4.43764	17991	PTS system_ IIB component OS=Streptococcus pyogenes serotype M49 (strain NZ131) OX=471876 GN=Spy49_0834 PE=4 SV=1	20.0787	24.8232	26.1988	6.14667	6.85807	9.43301	25.0439	24.9833	26.4785	34.4685	29.7239	35.3783	23.0307	25.1864	25.0248	15.6532	15.3615	16.1707	18.1994	19.1097	18.5209	21.916	20.306	20.1768	7.35173	7.15808	7.96462	9.44088	10.4451	9.48016	23.7002	7.47925	25.5019	33.1902	24.414	15.7285	18.61	20.7996	7.49148	9.78872
A0A0H3C1M1	2	2	13.3383	2.61282e-10	3.71612	10278.9	PTS system_ IIB component OS=Streptococcus pyogenes serotype M49 (strain NZ131) OX=471876 GN=Spy49_1611c PE=4 SV=1	0.0994284	0.103696	0.125684	0.106265	0.134653	0.123774	0.143595	0.100446	0.130252	0.432191	0.338258	0.416882	0.106159	0.118884	0.125018	0.106787	0.115007	0.120238	0.134196	0.0938829	0.115946	0.149405	0.167504	0.111765	0.17161	0.109836	0.109522	0.127937	0.108042	0.083529	0.109603	0.121564	0.124764	0.395777	0.116687	0.114011	0.114675	0.142891	0.130323	0.106503
A0A0H3BYA0	10	10	156.819	3.44169e-15	6.9165	11390.1	PTS system_ IIB component_ putative OS=Streptococcus pyogenes serotype M49 (strain NZ131) OX=471876 GN=Spy49_1328c PE=4 SV=1	15.6367	16.851	14.0448	4.0657	4.60752	3.93991	17.6808	19.5136	14.9065	30.1959	32.2815	24.7613	17.1825	17.4419	15.0183	9.73774	10.381	8.57415	10.9325	11.6623	9.40947	14.8306	16.041	13.4854	4.57107	5.59446	4.39884	4.53415	5.08033	4.26082	15.5109	4.20438	17.367	29.0796	16.5476	9.56429	10.6681	14.7857	4.85479	4.6251
A0A0H3BZV5	8	7	99.0904	1.47136e-10	6.46046	11601.2	PTS system_ lactose-specific IIA component (EIIA-Lac) (Lactose-permease IIA component) (Phosphotransferase enzyme II_ A component) OS=Streptococcus pyogenes serotype M49 (strain NZ131) OX=471876 GN=lacF PE=4 SV=1	22.6838	21.5725	28.7128	3.641	3.06663	4.5871	15.501	13.209	19.3255	17.2108	14.788	22.2305	23.5557	17.9516	25.7936	12.5569	10.2485	16.9407	13.9186	10.977	18.3905	18.8256	14.3407	20.9392	4.66461	3.52688	4.91746	4.51414	3.50029	5.23353	24.323	3.76491	16.0118	18.0765	22.4336	13.2487	14.4287	18.0352	4.36965	4.41599
A0A0H3BZX9	6	5	89.0837	6.6241e-08	2.35306	27682.8	PTS system_ mannose-specific IIC component OS=Streptococcus pyogenes serotype M49 (strain NZ131) OX=471876 GN=manM PE=4 SV=1	8.95276	8.96788	10.4548	7.01035	6.16072	7.87199	8.90609	7.93666	10.2659	7.71031	7.74898	10.5098	10.1244	9.19599	11.3151	14.7382	13.4683	16.9466	16.0634	15.1956	18.2566	8.74632	7.32337	9.22185	8.18904	6.7038	7.83576	7.39907	6.52694	7.65625	9.45847	7.01435	9.0362	8.65637	10.2118	15.051	16.5052	8.43052	7.5762	7.19409
A0A0H3BVQ6	14	12	134.018	0.0282427	1.46114	30782.5	Pur operon repressor OS=Streptococcus pyogenes serotype M49 (strain NZ131) OX=471876 GN=purR PE=3 SV=1	4.03206	4.34217	3.58552	3.86664	4.41385	3.85825	3.8339	4.60728	3.67117	4.85304	5.35916	4.36391	3.77925	4.78851	3.89208	3.84248	4.68598	3.55051	3.27796	3.91553	2.78239	3.4807	4.25368	3.4969	3.85282	4.17306	3.57705	4.46608	5.01315	4.63092	3.98658	4.04625	4.03745	4.8587	4.15328	4.02632	3.32529	3.74376	3.86764	4.70338
A0A0H3BWT9	14	12	188.797	1.25042e-08	1.75338	28432.8	Purine nucleoside phosphorylase DeoD-type OS=Streptococcus pyogenes serotype M49 (strain NZ131) OX=471876 GN=deoD2 PE=3 SV=1	10.591	12.1651	11.2166	9.79948	11.7771	11.5887	10.7535	11.5104	12.0937	11.62	11.7398	13.8097	11.4406	11.5816	11.69	14.3185	13.9293	14.0444	16.0977	17.4461	16.4466	11.2529	10.6393	11.661	9.97437	10.228	10.501	9.47375	9.24429	9.79295	11.3242	11.0551	11.4525	12.3898	11.5707	14.0974	16.6635	11.1844	10.2345	9.50366
A0A0H3C058	11	9	126.997	1.06182e-08	1.64013	28939.3	Purine nucleoside phosphorylase OS=Streptococcus pyogenes serotype M49 (strain NZ131) OX=471876 GN=punA PE=3 SV=1	15.2473	17.5831	15.811	13.2357	15.5788	16.1604	16.2899	17.896	17.2347	23.1999	24.0859	26.4787	17.6504	18.8038	18.6674	20.1667	22.2253	21.1968	21.7729	25.4777	21.4769	17.0447	17.0155	18.1725	15.2643	14.6975	15.8068	14.6284	14.5737	15.9514	16.2138	14.9916	17.1402	24.5882	18.3739	21.1962	22.9092	17.4109	15.2562	15.0511
A0A0H3BX45	3	3	33.4067	8.44411e-10	4.70279	41151.5	Putative 42 kDa protein OS=Streptococcus pyogenes serotype M49 (strain NZ131) OX=471876 GN=Spy49_0396 PE=4 SV=1	1.38821	1.18054	1.32556	1.20977	1.2441	1.66355	1.33106	1.25568	1.74592	0.31757	0.356964	0.3999	1.26536	1.12035	1.36243	1.49049	1.66358	1.89876	1.01725	1.09448	1.33588	1.24823	1.37076	1.27842	0.907532	0.782629	0.915755	0.604932	0.575418	0.643959	1.2981	1.37247	1.44422	0.358145	1.24938	1.68428	1.1492	1.29914	0.868639	0.608103
A0A0H3C0L1	6	6	54.241	4.02795e-08	3.37939	7055.05	Putative 4-oxalocrotonate tautomerase subunit OS=Streptococcus pyogenes serotype M49 (strain NZ131) OX=471876 GN=Spy49_0892c PE=3 SV=1	3.29365	3.15928	2.80253	3.01987	3.95541	2.66138	2.86164	3.10374	2.85825	3.74617	3.47323	2.94028	2.82716	3.10969	2.83553	2.02663	2.2493	1.76045	1.36195	2.21492	1.32767	3.09722	3.12025	3.11272	3.4955	4.1218	3.48369	5.36812	5.63301	5.57321	3.08515	3.21222	2.94121	3.38656	2.92412	2.01213	1.63484	3.11007	3.70033	5.52478
A0A0H3BX12	8	8	72.7533	0.00112078	1.66252	18576.8	Putative 7_8-dihydro-8-oxoguanine-triphosphatase OS=Streptococcus pyogenes serotype M49 (strain NZ131) OX=471876 GN=mutX PE=4 SV=1	2.34424	2.11253	2.80183	3.34066	3.37294	4.12854	2.45029	2.22198	3.32531	2.46088	2.18864	3.2051	2.36777	2.19539	2.83862	2.25896	2.01534	2.54276	2.56111	2.48956	3.10937	3.05557	2.52698	3.52516	3.71071	3.53388	4.08891	3.87004	3.19819	3.85497	2.41953	3.61405	2.66586	2.61821	2.46726	2.27235	2.72001	3.0359	3.77784	3.64107
A0A0H3BVJ0	27	17	299.808	0.00170394	1.75503	36861.4	Putative ABC transporter OS=Streptococcus pyogenes serotype M49 (strain NZ131) OX=471876 GN=Spy49_0142 PE=3 SV=1	13.9298	13.1008	17.6424	17.2992	16.2615	21.0313	13.9472	13.1685	16.7664	10.3677	9.09284	13.1158	14.7612	12.5512	15.7649	19.9383	15.9689	21.2652	18.4184	16.0639	21.0142	16.9928	13.0011	16.9383	16.8385	14.998	18.5257	13.3355	11.5727	14.0709	14.891	18.1973	14.6274	10.8588	14.3591	19.0574	18.4988	15.6441	16.7874	12.993
A0A0H3BWM1	2	2	14.5708	4.1378e-13	3.90672	22841.5	Putative ABC transporter OS=Streptococcus pyogenes serotype M49 (strain NZ131) OX=471876 GN=Spy49_0605 PE=4 SV=1	0.410818	0.404131	0.376017	0.398253	0.388903	0.441641	0.387884	0.411342	0.378104	0.141287	0.144945	0.148397	0.381588	0.373997	0.331913	0.573117	0.633209	0.491648	0.224765	0.230322	0.219954	0.362528	0.354365	0.363703	0.239369	0.197361	0.176721	0.167905	0.17859	0.162054	0.396989	0.409599	0.392443	0.144876	0.3625	0.565991	0.225014	0.360198	0.204484	0.169516
A0A0H3BWQ6	2	2	20.4229	3.46664e-09	5.72276	26185.3	Putative ABC transporter OS=Streptococcus pyogenes serotype M49 (strain NZ131) OX=471876 GN=Spy49_0656 PE=4 SV=1	0.359378	0.497723	0.383947	0.466858	0.548423	0.403319	0.561426	0.730969	0.489682	1.07162	1.17273	0.857236	0.478228	0.567042	0.464289	0.341174	0.528428	0.37218	0.172816	0.262574	0.209887	0.476512	0.630137	0.438811	0.477045	0.630174	0.470473	1.17424	1.3912	1.12734	0.413683	0.472866	0.594026	1.03386	0.503186	0.413927	0.215093	0.515153	0.525897	1.23092
A0A0H3BXU4	14	13	117.183	7.77156e-11	1.6692	71067.8	Putative ABC transporter OS=Streptococcus pyogenes serotype M49 (strain NZ131) OX=471876 GN=Spy49_0683 PE=4 SV=1	1.09962	1.14148	1.02811	0.939353	1.029	0.939947	0.879572	0.866027	0.902335	0.891829	0.931371	0.967865	0.904595	0.951891	0.956404	1.14587	1.19984	1.19517	1.48298	1.51314	1.4238	0.960612	1.05115	0.974812	0.89171	1.02462	0.89992	0.886764	0.962126	0.89573	1.08974	0.969432	0.882645	0.930355	0.93763	1.18029	1.47331	0.995523	0.93875	0.914874
A0A0H3BXW2	17	12	189.414	3.49137e-06	2.66307	31902.5	Putative ABC transporter OS=Streptococcus pyogenes serotype M49 (strain NZ131) OX=471876 GN=Spy49_0715 PE=3 SV=1	4.75156	4.36917	5.55949	5.0942	4.70303	6.68308	4.14819	3.50608	5.25968	3.25445	2.61491	3.79593	6.17213	5.10011	6.92357	6.43567	5.54858	7.23341	5.3406	4.83772	6.14378	4.95564	4.2032	5.22448	5.01928	4.52846	5.95474	2.60923	2.06333	2.54378	4.89341	5.49344	4.30465	3.22176	6.06527	6.40589	5.4407	4.79444	5.1675	2.40545
A0A0H3BYM8	11	11	118.303	1.65599e-05	1.32216	28029.4	Putative ABC transporter OS=Streptococcus pyogenes serotype M49 (strain NZ131) OX=471876 GN=Spy49_0800 PE=4 SV=1	3.90107	4.12802	3.62559	4.16075	4.54787	3.91319	3.76553	3.87522	3.60997	3.19924	3.29905	3.04804	3.33321	3.51028	3.04323	3.30246	3.64623	3.18231	3.86807	4.24101	3.81412	3.70432	3.82622	3.64233	4.0817	4.36807	3.90913	3.31104	3.47052	3.22727	3.88489	4.20727	3.75024	3.18211	3.29557	3.377	3.9744	3.72429	4.11963	3.33627
A0A0H3BY30	12	10	102.246	0.00622688	1.23538	72117.7	Putative ABC transporter OS=Streptococcus pyogenes serotype M49 (strain NZ131) OX=471876 GN=Spy49_0805 PE=4 SV=1	1.03516	1.11334	0.981973	1.04266	1.09265	0.969728	1.03913	0.990758	0.939509	1.10877	1.08505	0.922433	1.0922	1.00047	0.997791	0.962717	0.954241	0.902606	0.883835	0.869458	0.877623	0.974637	1.05356	1.06636	1.00204	1.04272	1.02468	1.06011	1.12715	1.06293	1.04349	1.03501	0.9898	1.03875	1.03015	0.939855	0.876972	1.03152	1.02315	1.0834
A0A0H3BZ36	6	5	48.239	2.21534e-12	3.84643	25332.1	Putative ABC transporter OS=Streptococcus pyogenes serotype M49 (strain NZ131) OX=471876 GN=Spy49_0998c PE=4 SV=1	0.194969	0.185803	0.226874	0.373391	0.366773	0.41608	0.441808	0.432424	0.500874	0.465759	0.460946	0.490635	0.535851	0.508871	0.615068	0.726005	0.642446	0.762008	0.70698	0.71801	0.912277	0.255937	0.222049	0.251851	0.281716	0.254608	0.295724	0.290415	0.289104	0.273404	0.202548	0.385415	0.458369	0.472446	0.553263	0.710153	0.779089	0.243279	0.277349	0.284308
A0A0H3C0V7	15	12	145.59	0.00094601	1.56559	26514.6	Putative ABC transporter OS=Streptococcus pyogenes serotype M49 (strain NZ131) OX=471876 GN=Spy49_1021 PE=4 SV=1	5.3085	5.92118	5.87666	5.21214	5.20236	6.1975	6.05994	5.83777	7.24599	6.49019	6.41902	8.28126	6.52085	5.77687	7.33202	7.42497	6.75448	8.11347	5.05849	5.28364	5.68232	6.28533	5.15483	6.35601	6.69791	5.91954	6.91932	8.39378	7.31993	9.37408	5.70211	5.53733	6.38124	7.06349	6.54325	7.43097	5.34148	5.93206	6.51226	8.3626
A0A0H3C0Z0	10	9	102.158	2.2778e-06	1.59506	27229	Putative ABC transporter OS=Streptococcus pyogenes serotype M49 (strain NZ131) OX=471876 GN=Spy49_1298c PE=4 SV=1	10.0463	9.97486	8.90936	6.69015	7.41201	6.10265	8.07942	8.41989	7.50707	8.69185	9.40942	9.00238	9.56105	9.13497	8.49589	9.82472	10.6318	8.9165	9.84139	11.9398	10.4467	8.93565	9.2251	8.52232	7.60431	8.45938	7.33943	7.65128	7.63771	7.19124	9.6435	6.73494	8.00213	9.03455	9.06397	9.791	10.7426	8.89436	7.80104	7.49341
A0A0H3BZB9	2	2	13.1034	6.86006e-06	1.4281	40459.7	Putative ABC transporter OS=Streptococcus pyogenes serotype M49 (strain NZ131) OX=471876 GN=Spy49_1344c PE=4 SV=1	0.971385	1.08019	0.994442	1.01758	1.01112	1.06385	1.01163	0.999838	1.14335	1.18286	1.2065	1.2189	0.97236	0.978601	1.01973	0.997991	0.944922	0.943292	0.808757	0.834096	0.883767	0.985355	0.966748	1.0488	0.959201	0.869472	0.953472	1.01956	0.870761	0.962867	1.01534	1.03085	1.0516	1.20275	0.990232	0.962068	0.842207	1.0003	0.927382	0.951063
A0A0H3C0C7	6	6	40.6168	0	7.49365	35860.8	Putative ABC transporter substrate-binding protein OS=Streptococcus pyogenes serotype M49 (strain NZ131) OX=471876 GN=Spy49_0797 PE=4 SV=1	0.402176	0.398165	0.414107	0.579643	0.629031	0.61552	0.596321	0.612863	0.638964	0.269682	0.268757	0.288329	0.272461	0.31691	0.299335	0.302581	0.335516	0.348289	0.0856829	0.0803046	0.080641	0.398231	0.40485	0.388193	0.391381	0.410386	0.388804	0.125196	0.135903	0.135869	0.404816	0.608065	0.616049	0.275589	0.296235	0.328795	0.0822095	0.397091	0.396857	0.132323
A0A0H3BYK9	8	7	58.5906	6.21766e-05	1.3989	63004.9	Putative ABC transporter_ ATP-binding protein OS=Streptococcus pyogenes serotype M49 (strain NZ131) OX=471876 GN=Spy49_0194 PE=4 SV=1	0.557716	0.678029	0.691793	0.770862	0.869533	0.940346	0.807112	0.752542	0.892636	0.727259	0.727149	0.696724	0.659859	0.685572	0.71147	0.635954	0.58601	0.630241	0.611829	0.635463	0.641123	0.727616	0.6633	0.767706	0.848506	0.781972	0.960573	0.813726	0.729342	0.851627	0.642513	0.860247	0.81743	0.717044	0.685634	0.617402	0.629472	0.719541	0.863684	0.798232
A0A0H3C0X2	4	4	32.5686	2.66454e-14	3.71777	23119.6	Putative acetyl-CoA:acetoacetyl-CoA transferase A subunit OS=Streptococcus pyogenes serotype M49 (strain NZ131) OX=471876 GN=atoD1 PE=3 SV=1	0.184967	0.170457	0.192848	0.332117	0.352766	0.362744	0.291386	0.286551	0.314511	0.142021	0.120279	0.141385	0.281124	0.243182	0.267502	0.28348	0.264838	0.288979	0.0974423	0.0890653	0.0952817	0.233413	0.230392	0.252509	0.242488	0.220231	0.238402	0.20458	0.165255	0.188829	0.182757	0.349209	0.297483	0.134562	0.263936	0.279099	0.0939298	0.238771	0.233707	0.186221
A0A0H3C241	22	17	239.683	0.0203031	1.27029	32675	Putative acid phosphatase OS=Streptococcus pyogenes serotype M49 (strain NZ131) OX=471876 GN=lppC PE=4 SV=1	12.1775	13.4838	13.8132	10.9086	10.7258	11.9788	12.7625	12.7727	16.1066	13.2689	13.0826	16.2308	12.557	12.434	13.8868	11.8953	11.2162	12.8761	10.8193	10.8594	11.8431	13.0905	11.8569	14.1518	11.6239	10.9455	12.8886	12.2701	12.0197	12.8129	13.1582	11.2044	13.8806	14.1941	12.9593	11.9959	11.1739	13.0331	11.8193	12.3675
A0A0H3C064	4	4	35.8723	2.3925e-05	1.48284	25046.4	Putative acid tolerance SatD-like protein OS=Streptococcus pyogenes serotype M49 (strain NZ131) OX=471876 GN=Spy49_0920 PE=4 SV=1	0.441007	0.539711	0.552373	0.593438	0.690847	0.651968	0.56019	0.614292	0.550744	0.53596	0.520293	0.594914	0.486276	0.506949	0.521026	0.624978	0.547172	0.596246	0.715053	0.729913	0.800431	0.55492	0.481781	0.572733	0.640154	0.632094	0.75146	0.62915	0.623848	0.669904	0.51103	0.645418	0.575075	0.550389	0.50475	0.589465	0.748466	0.536478	0.674569	0.640967
A0A0H3BX37	2	2	18.6878	0.000377104	1.43593	29506.7	Putative acyl-ACP thioesterase OS=Streptococcus pyogenes serotype M49 (strain NZ131) OX=471876 GN=Spy49_0820 PE=3 SV=1	0.369093	0.343073	0.428398	0.434308	0.395567	0.429665	0.446798	0.436906	0.531869	0.509188	0.449274	0.558978	0.427645	0.394959	0.502165	0.562891	0.521968	0.55291	0.543921	0.500169	0.57328	0.444135	0.434824	0.471007	0.414693	0.348367	0.419577	0.464914	0.395234	0.415743	0.380188	0.419847	0.471858	0.505813	0.44159	0.545923	0.539123	0.449989	0.394213	0.425297
A0A0H3BZ08	10	10	97.2424	7.71451e-10	2.61521	33439.2	Putative acylneuraminate lyase OS=Streptococcus pyogenes serotype M49 (strain NZ131) OX=471876 GN=nanH PE=3 SV=1	1.2988	1.38686	1.44956	0.831073	0.828066	1.01103	1.49353	1.20178	1.49069	2.0917	2.27763	2.61374	1.46698	1.43646	1.61415	1.23188	1.09014	1.29196	1.80493	1.46214	1.85427	1.43857	1.32094	1.48757	0.982672	0.94366	0.954535	0.878516	0.855641	1.02752	1.37841	0.890057	1.39533	2.32769	1.50586	1.20466	1.70711	1.41569	0.960289	0.92056
A0A0H3BYP8	9	9	87.3085	7.08467e-07	1.98741	66732.2	Putative acyltransferase OS=Streptococcus pyogenes serotype M49 (strain NZ131) OX=471876 GN=Spy49_0037 PE=4 SV=1	2.29349	2.09292	2.53082	2.39577	2.45196	2.80879	1.94021	2.0167	2.49461	1.5576	1.4531	1.92253	2.44417	2.37377	2.94816	3.14259	3.12721	3.53453	1.62103	1.63668	1.71464	2.4068	2.17737	2.66558	2.27224	1.89945	2.16311	1.52906	1.74288	1.88648	2.30575	2.55217	2.15051	1.64441	2.5887	3.26811	1.65745	2.41658	2.1116	1.71947
A0A0H3C0C8	2	2	34.7142	6.42508e-06	1.35023	13063.1	Putative alkaline-shock protein OS=Streptococcus pyogenes serotype M49 (strain NZ131) OX=471876 GN=asp PE=3 SV=1	6.71223	7.03502	7.33514	8.41126	8.31714	8.81384	7.31127	7.56792	8.54154	7.11279	6.89782	7.26339	7.03773	7.24436	7.27721	6.71189	5.93834	6.39882	6.11148	6.13661	6.66883	7.45623	7.52893	8.16163	8.60514	7.77221	8.74799	8.48951	7.29952	8.57718	7.02746	8.51408	7.80691	7.09133	7.18644	6.34968	6.30564	7.7156	8.37512	8.12207
A0A0H3BWU6	12	10	103.162	1.94405e-07	1.9252	53087.5	Putative amidase OS=Streptococcus pyogenes serotype M49 (strain NZ131) OX=471876 GN=amiC PE=4 SV=1	1.24722	1.32204	1.15851	1.39237	1.63357	1.26176	1.0658	1.08924	0.938399	0.868266	0.907947	0.777449	1.01338	1.08677	0.92712	0.932735	1.02196	0.909932	0.764666	0.785527	0.676947	1.12974	1.23311	1.0895	1.23852	1.34367	1.21269	1.06421	1.23605	1.0761	1.24259	1.42923	1.03114	0.851221	1.00909	0.954876	0.74238	1.15078	1.26496	1.12546
A0A0H3C1A5	4	3	34.4048	0	4.7002	26781.3	Putative amino acid ABC transporter OS=Streptococcus pyogenes serotype M49 (strain NZ131) OX=471876 GN=gtr PE=4 SV=1	0.265395	0.238895	0.25277	0.215377	0.223458	0.211343	0.209618	0.180805	0.211548	0.223285	0.239741	0.190493	0.231065	0.253103	0.22218	0.709018	0.716975	0.738684	0.951782	0.902564	0.975039	0.244735	0.261301	0.23823	0.217246	0.240742	0.220374	0.281689	0.243951	0.26027	0.252354	0.216726	0.200657	0.21784	0.235449	0.721559	0.943128	0.248089	0.226121	0.26197
A0A0H3BXY6	4	4	28.8843	0	6.13264	25316.2	Putative amino acid ABC transporter OS=Streptococcus pyogenes serotype M49 (strain NZ131) OX=471876 GN=Spy49_1162c PE=3 SV=1	0.18522	0.188669	0.18627	0.172889	0.171268	0.17479	0.177545	0.176577	0.170981	0.159888	0.168396	0.136645	0.209562	0.20851	0.206238	0.930625	0.949506	0.958764	0.965755	0.932072	0.953418	0.170378	0.16914	0.181972	0.178203	0.165998	0.185825	0.168366	0.177085	0.170231	0.18672	0.172982	0.175034	0.154977	0.208103	0.946298	0.950415	0.17383	0.176675	0.171894
A0A0H3BXJ0	17	14	147.855	7.23685e-05	2.75419	31810.4	Putative amino acid ABC transporter_ periplasmic amino acid-binding protein OS=Streptococcus pyogenes serotype M49 (strain NZ131) OX=471876 GN=Spy49_1011c PE=4 SV=1	1.16749	1.19099	1.43529	1.40451	1.2661	1.86472	1.26492	1.19078	1.86103	0.715606	0.679585	1.06556	1.29583	1.16938	1.61836	1.80031	1.61665	2.13226	1.35934	1.39016	1.72583	1.32518	1.12629	1.51105	1.30235	1.10078	1.50486	0.670082	0.574693	0.770053	1.26459	1.51177	1.43891	0.82025	1.36119	1.84974	1.49178	1.32084	1.30266	0.67161
A0A0H3BZ47	2	2	13.5328	2.0111e-10	4.84558	46797.5	Putative amino acid symporter OS=Streptococcus pyogenes serotype M49 (strain NZ131) OX=471876 GN=Spy49_1008 PE=3 SV=1	0.0841788	0.0790424	0.0779424	0.108608	0.117175	0.0985494	0.104414	0.126301	0.0958578	0.0962409	0.0989503	0.0706445	0.202984	0.259928	0.201467	0.377505	0.461954	0.306393	0.317417	0.338853	0.258021	0.074019	0.0972323	0.0652223	0.0903372	0.115651	0.0814098	0.0987348	0.112262	0.0966498	0.0803879	0.108111	0.108858	0.0886119	0.22146	0.38195	0.304763	0.0788245	0.0957992	0.102549
A0A0H3C0Q7	11	9	112.248	0	3.45936	13953.1	Putative anaerobic ribonucleotide reductase OS=Streptococcus pyogenes serotype M49 (strain NZ131) OX=471876 GN=Spy49_0957c PE=4 SV=1	2.12848	2.1925	2.16047	3.70157	3.96962	3.77017	3.18094	3.21211	3.36859	4.56656	4.46622	4.818	2.88717	2.87048	3.22681	2.13038	2.11931	2.13751	1.73413	1.64393	1.90789	2.81244	2.99682	2.79076	3.61933	3.88693	3.30547	5.91325	6.37213	6.00064	2.16049	3.81379	3.25388	4.61693	2.99482	2.12907	1.76198	2.86667	3.60391	6.09534
A0A0H3BXK1	7	7	50.4074	2.22189e-11	1.44455	13530.6	Putative arsenate reductase OS=Streptococcus pyogenes serotype M49 (strain NZ131) OX=471876 GN=Spy49_0333 PE=3 SV=1	1.69186	1.80929	1.72709	2.05236	2.29559	2.27856	1.57389	1.59925	1.61306	1.59413	1.60419	1.6551	1.75439	1.8124	1.80029	1.69217	1.7723	1.63448	2.24975	2.39211	2.27205	1.97573	1.90787	1.93349	2.09285	2.2272	2.147	1.88263	2.01207	1.99133	1.74275	2.20884	1.5954	1.61781	1.78903	1.69965	2.30463	1.93903	2.15568	1.96201
A0A0H3C1T7	20	17	194.745	6.6458e-13	1.83825	46651.1	Putative ATP-binding cassette transporter protein OS=Streptococcus pyogenes serotype M49 (strain NZ131) OX=471876 GN=Spy49_1680c PE=4 SV=1	2.0695	2.04686	2.00889	3.11688	3.14829	3.42667	2.92981	2.77801	3.16278	1.7627	1.76055	1.74908	1.94186	1.83602	1.77682	1.9941	2.1032	2.02058	1.86638	2.15576	1.92832	2.01645	2.03276	2.1753	2.38638	2.35996	2.50553	1.91712	1.93581	1.87173	2.04175	3.23062	2.95687	1.75744	1.85157	2.03929	1.98349	2.07484	2.41729	1.90822
A0A0H3BYF0	46	38	569.041	7.12397e-12	2.2215	77365.6	Putative ATP-dependent Clp proteinase OS=Streptococcus pyogenes serotype M49 (strain NZ131) OX=471876 GN=clpL PE=4 SV=1	14.2189	16.6022	14.422	16.6754	18.6261	16.6952	13.2755	14.8638	13.1996	17.75	18.5552	16.4443	11.7003	13.4711	12.2554	9.37389	10.6896	9.58674	9.30964	10.2137	8.71361	15.2728	15.5272	14.2931	17.5124	18.7784	18.3064	20.2245	21.4323	21.0715	15.081	17.3322	13.7796	17.5832	12.4756	9.88342	9.41233	15.031	18.1991	20.9095
A0A0H3BZI7	61	53	801.709	3.45611e-09	3.67181	84937.1	Putative ATP-dependent protease OS=Streptococcus pyogenes serotype M49 (strain NZ131) OX=471876 GN=clpE PE=3 SV=1	11.5591	12.2966	14.13	20.5757	19.7297	26.321	19.2261	16.933	23.0799	16.8766	15.819	21.1013	15.6155	14.1014	17.5988	11.3319	9.4736	12.305	5.88456	5.38196	6.87889	16.4729	14.0718	18.1299	21.1358	17.6427	23.5521	20.0149	17.8299	21.9639	12.6619	22.2088	19.7463	17.9323	15.7719	11.0368	6.04847	16.2248	20.7769	19.9362
A0A0H3C1N3	5	5	66.856	0.0218396	1.53379	12842.4	Putative bacterocin transport accessory protein_ Bta OS=Streptococcus pyogenes serotype M49 (strain NZ131) OX=471876 GN=Spy49_1625c PE=4 SV=1	4.43263	5.23527	3.62098	4.63607	5.53465	3.96549	4.96671	5.25829	4.11547	4.9616	5.59045	4.25436	5.43833	6.02785	4.39479	3.73553	4.23784	2.97499	3.46238	3.93354	2.9451	4.05562	4.67808	3.72498	4.46929	4.91104	4.02669	4.9783	5.30113	4.89173	4.42963	4.71207	4.78016	4.93547	5.28699	3.64946	3.44701	4.15289	4.46901	5.05705
A0A0H3BWB9	2	2	12.9327	0	6.95183	54189.9	Putative beta-glucosidase OS=Streptococcus pyogenes serotype M49 (strain NZ131) OX=471876 GN=bglA PE=3 SV=1	0.369445	0.442453	0.382938	0.0537138	0.0659215	0.0522385	0.191186	0.190419	0.18139	0.225029	0.225298	0.23609	0.309016	0.302078	0.30037	0.183836	0.187184	0.173337	0.173524	0.187054	0.16552	0.179768	0.194852	0.185018	0.0615294	0.0658525	0.0784984	0.0850864	0.0821419	0.0788074	0.398279	0.0572912	0.187665	0.228806	0.303821	0.181452	0.175366	0.186546	0.0686268	0.0820119
A0A0H3BWH3	53	43	570.633	0.491453	1.246	97129.2	Putative calcium-transporting ATPase OS=Streptococcus pyogenes serotype M49 (strain NZ131) OX=471876 GN=pacL PE=4 SV=1	8.53906	7.62109	9.75259	9.61636	7.97262	10.3318	10.0212	9.53918	10.9736	8.95043	8.43559	9.99433	10.6284	8.19304	10.364	11.0203	9.6839	11.5831	8.76374	7.41457	10.8392	9.36957	7.61129	9.54754	9.39492	7.65528	9.74965	9.75476	8.61597	10.1009	8.63758	9.30691	10.178	9.12678	9.72848	10.7624	9.00583	8.8428	8.93328	9.49053
A0A0H3C012	6	6	44.4159	0.000223806	1.57283	34637.2	Putative capsular polysaccharide biosynthesis regulatory protein OS=Streptococcus pyogenes serotype M49 (strain NZ131) OX=471876 GN=Spy49_0646 PE=3 SV=1	0.322415	0.27593	0.305708	0.269752	0.269908	0.30396	0.281739	0.260533	0.317234	0.269114	0.250875	0.325956	0.295569	0.279332	0.324721	0.369822	0.339902	0.401899	0.380029	0.384066	0.411985	0.271173	0.258279	0.28773	0.246877	0.234455	0.266417	0.294846	0.321364	0.415239	0.301351	0.281206	0.286502	0.281981	0.299874	0.370541	0.392027	0.272394	0.249249	0.343816
A0A0H3C089	3	3	22.7827	0	85.6372	48032.1	Putative cationic amino acid transporter protein OS=Streptococcus pyogenes serotype M49 (strain NZ131) OX=471876 GN=Spy49_1729 PE=4 SV=1	0.0632996	0.0669272	0.0697843	0.0302355	0.0323996	0.041009	0.0527596	0.0524904	0.0647454	2.64064	2.8133	3.42185	0.102225	0.0935588	0.111582	0.04855	0.045429	0.0677028	0.055768	0.0527889	0.0660183	0.117136	0.110635	0.127863	0.0507255	0.0367083	0.0496977	0.0636128	0.0525013	0.0699052	0.0666704	0.034548	0.0566651	2.9586	0.102455	0.0538939	0.0581917	0.118545	0.0457105	0.0620064
A0A0H3C115	9	8	100.936	5.48902e-07	2.69192	15595.6	Putative cell-cycle regulation histidine triad (HIT) protein OS=Streptococcus pyogenes serotype M49 (strain NZ131) OX=471876 GN=hit PE=4 SV=1	4.32825	4.79399	3.91758	6.12119	7.40941	5.01544	4.81133	5.44675	4.03222	6.02994	6.68183	5.27526	4.96874	5.72476	4.5342	4.18535	4.91929	3.79899	2.90872	3.60187	2.72721	5.15263	5.8145	4.69158	6.47832	7.38383	6.30594	8.10285	8.61381	8.1508	4.3466	6.18201	4.76343	5.99568	5.0759	4.30121	3.07927	5.21957	6.7227	8.28915
A0A0H3BXG4	4	4	32.4435	4.24675e-06	1.7402	45111.8	Putative chromosome replication initiation protein/membrane attachment protein OS=Streptococcus pyogenes serotype M49 (strain NZ131) OX=471876 GN=dnaB PE=4 SV=1	0.385901	0.449111	0.409069	0.306265	0.322312	0.262415	0.349011	0.331792	0.260521	0.278146	0.345963	0.220711	0.409324	0.41325	0.350349	0.519122	0.477862	0.473173	0.438935	0.501679	0.413466	0.382633	0.317066	0.32056	0.321099	0.294009	0.306391	0.30611	0.293616	0.314754	0.414694	0.296997	0.313775	0.281607	0.390974	0.490052	0.45136	0.340086	0.307166	0.304827
A0A0H3BZ19	19	17	201.038	1.76878e-08	1.64318	35925.1	Putative CMP-binding factor OS=Streptococcus pyogenes serotype M49 (strain NZ131) OX=471876 GN=cbf PE=4 SV=1	3.15449	3.41643	3.14861	3.15785	3.53826	2.95865	3.25337	3.22948	3.11027	3.29098	3.13457	3.23205	3.59353	3.20188	3.18252	4.70626	4.16745	4.10863	4.71897	4.68467	5.11912	3.0833	2.84162	3.1296	3.20778	2.8283	3.14278	3.19978	2.75774	2.88069	3.23984	3.21825	3.19771	3.2192	3.32597	4.32744	4.84092	3.01818	3.05962	2.94607
B5XJ05	13	11	104.799	4.75368e-09	1.4332	46124.8	Putative competence-damage inducible protein OS=Streptococcus pyogenes serotype M49 (strain NZ131) OX=471876 GN=cinA PE=3 SV=1	1.33388	1.46816	1.34864	1.79288	1.98496	1.89353	1.6025	1.64962	1.64223	1.60954	1.74633	1.65938	1.45596	1.53761	1.44609	1.32585	1.36097	1.27032	1.62127	1.60731	1.5464	1.41606	1.42832	1.43452	1.62398	1.63663	1.72675	1.52976	1.65645	1.64352	1.38356	1.89046	1.63145	1.67175	1.47989	1.31905	1.59166	1.4263	1.66245	1.60991
A0A0H3BYR4	17	15	205.022	6.2268e-12	2.0325	21105.1	Putative cytoplasmic membrane protein OS=Streptococcus pyogenes serotype M49 (strain NZ131) OX=471876 GN=lemA PE=3 SV=1	4.86417	5.29035	4.82721	7.45552	8.49625	8.74765	6.73409	6.81567	6.98051	7.26001	8.22187	7.88989	6.75098	6.76618	7.02621	5.37306	5.56378	5.82585	3.87098	4.02215	4.53003	6.9221	6.82631	6.91016	6.76239	7.29223	6.52067	8.09875	8.97074	8.18059	4.99391	8.23314	6.84342	7.79059	6.84779	5.58756	4.14105	6.88619	6.85843	8.41669
A0A0H3BW15	6	6	47.2983	5.12583e-07	1.42181	25221.8	Putative dehydrogenease / oxidoreductase OS=Streptococcus pyogenes serotype M49 (strain NZ131) OX=471876 GN=Spy49_0372 PE=3 SV=1	0.590716	0.687489	0.634135	0.666976	0.788289	0.730209	0.648586	0.637722	0.615079	0.61107	0.615548	0.60443	0.554417	0.617103	0.58762	0.585255	0.646785	0.627492	0.52757	0.54285	0.501355	0.637309	0.630594	0.622632	0.71052	0.747496	0.710329	0.774067	0.723097	0.737603	0.637446	0.728492	0.633795	0.610349	0.58638	0.619844	0.523925	0.630178	0.722782	0.744922
A0A0H3C0Q5	12	8	92.2933	0.000567487	1.5947	54883.4	Putative deoxyribodipyrimidine photolyase OS=Streptococcus pyogenes serotype M49 (strain NZ131) OX=471876 GN=phr PE=3 SV=1	0.74969	0.736912	0.900669	0.946875	0.831262	1.01963	0.952583	0.81545	1.03197	1.00303	0.958807	1.13173	0.877186	0.766819	0.885764	0.841638	0.702162	0.916972	0.611448	0.60988	0.718586	0.978899	0.831368	1.0094	1.00506	0.948629	1.06909	1.03907	0.911694	1.0983	0.795757	0.93259	0.933336	1.03119	0.843256	0.820258	0.646638	0.939888	1.00759	1.01636
A0A0H3C029	12	12	106.3	0.000122152	1.86597	36671.4	Putative divalent cation transport protein_ magnesium transporter_ CorA family OS=Streptococcus pyogenes serotype M49 (strain NZ131) OX=471876 GN=Spy49_1424 PE=3 SV=1	4.03879	4.30271	4.05604	4.61808	5.185	3.50733	4.3874	4.81277	3.50263	4.85273	4.96536	3.77498	4.75583	4.28704	3.60184	3.5975	3.30671	2.84994	4.25805	4.89988	4.06731	4.4279	4.11376	4.40641	6.07389	6.05974	6.06735	6.18934	5.73545	5.92717	4.13252	4.4368	4.23427	4.53102	4.2149	3.25138	4.40842	4.31602	6.06699	5.95065
A0A0H3C225	5	5	46.2373	2.94742e-12	2.08116	21828.4	Putative DNA polymerase III epsilon subunit OS=Streptococcus pyogenes serotype M49 (strain NZ131) OX=471876 GN=dnaQ PE=4 SV=1	0.74859	0.834359	0.721062	0.605811	0.585305	0.58856	0.554288	0.518735	0.535286	0.584271	0.617653	0.64357	0.669507	0.677767	0.663561	0.768385	0.837961	0.830838	1.04021	1.19027	1.11668	0.653345	0.726412	0.662293	0.636168	0.616917	0.672632	0.673995	0.642288	0.66316	0.768004	0.593225	0.536103	0.615165	0.670278	0.812394	1.11572	0.680683	0.641906	0.659814
A0A0H3BZ85	47	35	533.815	2.0671e-07	1.7265	90720.6	Putative endopeptidase Clp ATP-binding chain C OS=Streptococcus pyogenes serotype M49 (strain NZ131) OX=471876 GN=clpC PE=3 SV=1	5.82798	6.99937	6.04891	6.93128	8.09346	7.17771	6.43768	6.69094	6.03384	5.91565	6.20816	5.47754	5.66677	6.15009	5.36552	6.07085	6.37467	5.64027	4.26339	4.58887	4.00752	5.89251	6.06391	5.73426	6.75711	6.83952	6.96758	6.28766	6.4304	6.14164	6.29209	7.40082	6.38749	5.86712	5.72746	6.02859	4.2866	5.89689	6.85474	6.28656
A0A0H3C1X8	43	39	598.148	4.0478e-09	1.61093	71372.3	Putative endopeptidase O OS=Streptococcus pyogenes serotype M49 (strain NZ131) OX=471876 GN=pepO PE=4 SV=1	24.9816	25.4981	23.7442	26.9908	28.1435	24.9032	21.3265	20.0017	18.2354	18.2999	17.2354	16.3309	23.3277	23.2381	21.1569	25.4803	25.668	23.5301	28.3464	28.5542	26.6521	24.714	26.2745	23.3808	26.9469	27.4433	26.4182	27.2074	25.9505	25.3795	24.7413	26.6792	19.8545	17.2887	22.5743	24.8928	27.8509	24.7898	26.9362	26.1791
A0A0H3BYN9	5	5	33.286	6.85332e-05	1.45667	37768.6	Putative esterase OS=Streptococcus pyogenes serotype M49 (strain NZ131) OX=471876 GN=Spy49_1033c PE=4 SV=1	0.516155	0.535854	0.571453	0.517798	0.481607	0.55938	0.624352	0.577631	0.691018	0.637826	0.626168	0.773755	0.607415	0.587489	0.633815	0.771828	0.706699	0.792115	0.542397	0.528072	0.623629	0.522847	0.497049	0.557701	0.543753	0.465153	0.596717	0.743122	0.632982	0.759801	0.541154	0.519595	0.631	0.67925	0.609573	0.756881	0.564699	0.525866	0.535208	0.711968
A0A0H3BY48	6	6	48.3841	0.000207041	1.2673	35820	Putative gluconeogenesis factor OS=Streptococcus pyogenes serotype M49 (strain NZ131) OX=471876 GN=Spy49_0546 PE=3 SV=1	1.66826	1.7949	1.56148	1.70435	1.85619	1.60367	1.89027	2.02682	1.85915	1.93655	2.10787	1.87822	1.63795	1.78905	1.5257	1.97325	2.11833	1.91691	1.93484	2.11861	1.77835	1.51924	1.67784	1.5441	1.54796	1.63586	1.63337	1.76838	1.73756	1.68436	1.67488	1.7214	1.92541	1.97421	1.6509	2.00283	1.94393	1.58039	1.60573	1.7301
A0A0H3BVP7	2	2	13.2146	1.11022e-16	8.12162	33807.1	Putative glucose kinase OS=Streptococcus pyogenes serotype M49 (strain NZ131) OX=471876 GN=Spy49_0217 PE=4 SV=1	0.214663	0.250343	0.188705	0.0604936	0.0624006	0.055221	0.262098	0.251385	0.233995	0.396411	0.447811	0.450752	0.212195	0.223409	0.199007	0.0995229	0.118091	0.101397	0.0856717	0.0958893	0.0697599	0.186151	0.191531	0.176602	0.0415971	0.0604157	0.0574349	0.0468883	0.059917	0.0549865	0.217904	0.0593717	0.24916	0.431658	0.211537	0.106337	0.0837736	0.184761	0.0531493	0.0539306
A0A0H3BZ37	12	11	116.213	1.74164e-09	4.57077	50006.2	Putative glucosyl transferase OS=Streptococcus pyogenes serotype M49 (strain NZ131) OX=471876 GN=Spy49_0434 PE=4 SV=1	0.681355	0.722145	0.610007	0.666563	0.833731	0.582787	0.805805	0.960786	0.646549	0.905314	0.956808	0.713966	0.858442	1.06042	0.817505	2.06705	2.57131	1.79306	0.844352	0.9691	0.720653	0.587078	0.687471	0.53752	0.435415	0.527863	0.443799	0.481158	0.566521	0.511513	0.671169	0.69436	0.80438	0.858696	0.912122	2.14381	0.844702	0.604023	0.469025	0.519731
A0A0H3BWR9	17	12	138.55	0.00915412	1.25551	54591.5	Putative glutamine-binding periplasmic protein OS=Streptococcus pyogenes serotype M49 (strain NZ131) OX=471876 GN=Spy49_0237c PE=3 SV=1	4.1856	4.5867	4.05226	4.19996	5.03182	4.13842	4.50285	4.9567	4.3935	4.1613	4.18456	4.16292	4.01009	4.41725	3.75106	4.18158	4.52181	4.06193	4.68295	5.26645	4.89869	3.93358	4.12857	3.76415	4.14221	4.67912	4.47393	4.72379	4.83505	4.47898	4.27485	4.45673	4.61769	4.16959	4.05947	4.25511	4.94936	3.9421	4.43175	4.67927
A0A0H3BYE2	13	9	128.722	1.98834e-11	2.93238	38775	Putative glutamyl-aminopeptidase OS=Streptococcus pyogenes serotype M49 (strain NZ131) OX=471876 GN=pepA PE=3 SV=1	4.62665	4.59547	4.20775	3.96382	4.65178	3.42753	4.51565	4.37252	3.961	1.78388	1.72579	1.50869	4.13254	4.21551	3.79471	4.55758	4.55715	3.96291	2.91794	3.31605	2.6679	4.4128	4.72127	4.34876	4.52988	4.49475	4.50858	5.05708	5.01991	4.63875	4.47662	4.01437	4.28305	1.67279	4.04759	4.35922	2.9673	4.49428	4.51107	4.90524
A0A0H3BYK5	3	3	21.1547	0.887238	1.23741	34431.8	Putative glycerol uptake facilitator protein OS=Streptococcus pyogenes serotype M49 (strain NZ131) OX=471876 GN=glpF2 PE=3 SV=1	1.07954	1.11668	1.34969	1.17115	1.08441	1.38328	1.16342	1.09994	1.43063	1.08844	1.04547	1.48492	1.3606	1.20168	1.34901	1.39214	1.10008	1.69387	1.21739	1.06388	1.58917	1.19987	0.948116	1.23497	1.19117	1.04326	1.32565	1.29059	1.07891	1.29669	1.18197	1.21295	1.23133	1.20628	1.30376	1.39536	1.29015	1.12765	1.1867	1.22206
A0A0H3BWN3	9	8	76.9425	5.88418e-14	1.74367	39361.6	Putative glycosyltransferase OS=Streptococcus pyogenes serotype M49 (strain NZ131) OX=471876 GN=rgpEc PE=4 SV=1	1.69102	1.59395	1.58423	1.45519	1.44604	1.42902	1.68805	1.59682	1.79343	1.78494	1.83939	1.9351	1.62667	1.46955	1.63578	2.03295	2.05589	1.9669	2.37188	2.36943	2.27872	1.49697	1.49737	1.50838	1.33134	1.37964	1.34858	1.33614	1.34431	1.34556	1.62307	1.44342	1.69276	1.85314	1.57733	2.01858	2.34001	1.50091	1.35319	1.34201
A0A0H3BXZ7	48	43	609.85	2.2101e-07	1.76093	68687.2	Putative GTP-binding protein TypA/BipA OS=Streptococcus pyogenes serotype M49 (strain NZ131) OX=471876 GN=Spy49_1179c PE=4 SV=1	10.0568	10.9641	11.195	11.9891	12.212	14.0254	11.0746	9.96747	12.8449	8.81431	9.0773	10.8713	11.088	10.8516	12.8588	15.8579	16.3016	18.2157	16.3966	17.3455	16.9074	10.7319	10.0602	11.6576	10.5906	10.4085	11.6275	10.2598	10.4266	11.6745	10.7386	12.7422	11.2956	9.58765	11.5994	16.7917	16.8832	10.8165	10.8755	10.787
A0A0H3BZH5	5	5	40.0938	9.08518e-12	2.93296	67927.1	Putative heavy metal-transporting ATPase OS=Streptococcus pyogenes serotype M49 (strain NZ131) OX=471876 GN=cadA PE=3 SV=1	0.735961	0.804851	0.874069	0.51349	0.493128	0.591189	0.883923	0.835532	1.00286	1.09438	1.06899	1.19826	0.735171	0.75308	0.820952	0.396675	0.356452	0.393027	0.381749	0.402034	0.458057	0.677178	0.668387	0.775946	0.623319	0.553373	0.6237	0.777344	0.66104	0.740038	0.80496	0.532602	0.907437	1.12054	0.769734	0.382051	0.413947	0.70717	0.600131	0.72614
A0A0H3BYT9	9	9	76.1813	0.000501765	1.46304	49873.4	Putative hemolysin OS=Streptococcus pyogenes serotype M49 (strain NZ131) OX=471876 GN=hlyX PE=3 SV=1	1.3024	1.39166	1.19217	1.27701	1.61111	1.14237	1.63373	1.91626	1.48244	1.58506	1.59665	1.34339	1.33384	1.54923	1.30654	1.72068	1.95981	1.6503	1.71328	1.9311	1.81812	1.26745	1.40965	1.19307	1.22011	1.45956	1.20676	1.19568	1.36444	1.17355	1.29541	1.3435	1.67748	1.50836	1.39654	1.77693	1.82083	1.29006	1.29548	1.24456
A0A0H3BXY3	5	5	47.861	8.88178e-16	2.09553	30468.1	Putative hemolysin OS=Streptococcus pyogenes serotype M49 (strain NZ131) OX=471876 GN=Spy49_1154c PE=4 SV=1	1.12484	1.28595	1.20082	1.15033	1.31305	1.18631	1.16247	1.1772	1.13634	1.0961	1.09976	1.12004	1.30488	1.30827	1.17154	1.98365	2.00793	2.02514	2.20056	2.37718	2.14516	1.07631	1.07456	1.05734	1.09516	1.12633	1.06993	1.09814	1.06866	1.09662	1.20387	1.21656	1.15867	1.1053	1.26156	2.00557	2.24097	1.0694	1.09714	1.08781
A0A0H3BYR6	2	2	20.0202	0.00125506	1.80611	14866	Putative histidine triad (HIT) protein OS=Streptococcus pyogenes serotype M49 (strain NZ131) OX=471876 GN=Spy49_0083c PE=4 SV=1	0.362021	0.35262	0.452163	0.512707	0.452946	0.561299	0.40197	0.31625	0.470653	0.401978	0.305721	0.422291	0.396199	0.312349	0.423352	0.439521	0.373513	0.474609	0.605382	0.588899	0.846599	0.446725	0.411804	0.540095	0.565944	0.443628	0.598271	0.607551	0.472842	0.562945	0.388934	0.508984	0.396291	0.376663	0.3773	0.429214	0.680293	0.466208	0.535948	0.547779
A0A0H3C1U7	2	2	12.7288	2.01123e-08	1.92965	17308.5	Putative late competence protein required for DNA binding OS=Streptococcus pyogenes serotype M49 (strain NZ131) OX=471876 GN=comEB PE=3 SV=1	0.247626	0.227338	0.295199	0.298122	0.324527	0.301229	0.280005	0.282539	0.326433	0.269386	0.263975	0.287668	0.269253	0.2761	0.286232	0.241408	0.204899	0.246616	0.257419	0.274707	0.286402	0.335913	0.317843	0.339383	0.384096	0.385452	0.420835	0.435592	0.401293	0.500216	0.256721	0.307959	0.296326	0.273676	0.277195	0.230974	0.272843	0.331046	0.396794	0.4457
A0A0H3BYG3	29	17	411.562	2.97881e-09	2.05073	36437.1	Putative lipoprotein OS=Streptococcus pyogenes serotype M49 (strain NZ131) OX=471876 GN=Spy49_0974c PE=3 SV=1	23.8828	26.7367	21.3919	15.8922	19.8613	16.757	23.88	25.2314	21.9088	29.139	32.2332	28.6088	25.9129	27.7854	23.8123	33.6015	37.27	33.3937	35.381	38.5368	33.7671	22.8464	23.8416	22.286	17.3973	19.8977	16.09	20.3693	23.5967	20.5789	24.0038	17.5035	23.6734	29.9936	25.8369	34.7551	35.895	22.9914	17.795	21.515
A0A0H3BY81	4	4	27.0715	0	59.0206	47717	Putative L-malate permease OS=Streptococcus pyogenes serotype M49 (strain NZ131) OX=471876 GN=malP PE=3 SV=1	0.0750409	0.0761437	0.0721949	0.0866827	0.0815108	0.0849742	0.0372192	0.0239797	0.0306843	1.93846	1.80411	1.68043	0.0786581	0.0539562	0.062389	0.0375288	0.0301056	0.0327536	0.0358097	0.0274042	0.0369104	0.0659311	0.0651754	0.0886264	0.0933239	0.084051	0.102522	0.103269	0.078536	0.0990872	0.0744599	0.0843892	0.0306277	1.80767	0.0650011	0.0334627	0.0333748	0.0732443	0.0932989	0.0936306
A0A0H3C056	2	2	23.4529	6.44082e-05	1.78062	18535	Putative low temperature requirement C protein OS=Streptococcus pyogenes serotype M49 (strain NZ131) OX=471876 GN=Spy49_1694 PE=4 SV=1	1.54602	1.71647	1.35077	1.60613	1.93326	1.3326	1.21796	1.40466	1.02496	1.36051	1.38736	1.13413	1.09639	1.15031	1.03214	0.921002	1.02867	0.881504	1.18956	1.34837	1.11068	1.48452	1.59922	1.3276	1.60555	1.83408	1.60163	1.45528	1.49384	1.40262	1.53776	1.624	1.21586	1.294	1.09295	0.943725	1.2162	1.47044	1.68042	1.45058
A0A0H3BXK4	8	7	70.2613	1.52384e-11	2.28498	38248.4	Putative maltose operon transcriptional repressor OS=Streptococcus pyogenes serotype M49 (strain NZ131) OX=471876 GN=malR PE=4 SV=1	0.663066	0.660836	0.674069	0.384261	0.420609	0.391031	0.599161	0.53651	0.686465	0.94386	0.924872	0.863882	0.678064	0.589979	0.624175	0.587879	0.535469	0.591831	0.593061	0.57755	0.621903	0.673503	0.596622	0.570966	0.411869	0.41063	0.406737	0.449695	0.449525	0.438171	0.66599	0.398634	0.607378	0.910871	0.630739	0.571726	0.597505	0.613697	0.409745	0.445797
A0A0H3C124	17	15	218.372	2.40475e-07	2.03945	33286.2	Putative mannose-specific phosphotransferase system component IID OS=Streptococcus pyogenes serotype M49 (strain NZ131) OX=471876 GN=manN PE=4 SV=1	27.0736	28.0219	29.6184	21.3382	19.653	24.173	25.9336	25.2838	32.0479	26.5215	26.1753	32.7234	28.3933	24.7705	29.3703	44.1007	38.7783	47.9529	43.3382	42.8054	46.7558	27.2929	25.4867	30.4257	25.5427	21.8539	26.4465	26.1851	22.7988	28.5828	28.238	21.7214	27.7551	28.4734	27.5114	43.6107	44.2998	27.7351	24.6143	25.8556
A0A0H3BXP7	10	10	98.3507	0.00275635	1.2698	24951.7	Putative metal-dependent transcriptional regulator OS=Streptococcus pyogenes serotype M49 (strain NZ131) OX=471876 GN=Spy49_0380c PE=3 SV=1	3.22393	3.58801	3.08473	3.85153	4.65958	4.05566	3.83177	3.99748	3.75711	3.14501	3.61151	3.39029	3.56801	3.7706	3.58009	3.61096	3.7175	3.53823	3.39023	3.7099	3.4458	3.41808	3.3399	3.39048	3.63579	3.8146	3.44244	3.45066	3.98412	3.66232	3.29889	4.18892	3.86212	3.38227	3.63957	3.62223	3.51531	3.38282	3.63094	3.69903
B5XJP1	10	7	109.724	7.77156e-16	6.62241	25249.2	Putative N-acetylmannosamine-6-phosphate 2-epimerase OS=Streptococcus pyogenes serotype M49 (strain NZ131) OX=471876 GN=nanE PE=3 SV=1	2.15108	2.34385	1.95226	0.533491	0.639748	0.544479	2.13994	2.59018	1.88818	3.87995	4.13611	3.35937	2.1145	2.2042	1.94286	1.05063	1.13738	0.965198	0.934228	1.03794	0.869385	1.76648	1.91097	1.77847	0.663467	0.660979	0.692604	0.786365	0.852495	0.762991	2.14907	0.572573	2.2061	3.79181	2.08718	1.05107	0.947184	1.81864	0.67235	0.800617
A0A0H3BZF7	16	15	174.508	1.04152e-10	1.71904	25342.2	Putative NAD(P)H-flavin oxidoreductase OS=Streptococcus pyogenes serotype M49 (strain NZ131) OX=471876 GN=Spy49_0430c PE=3 SV=1	3.40128	3.86253	3.3796	4.6603	5.41961	4.35035	4.26067	4.25835	3.94884	5.68627	5.7722	5.14057	3.63776	3.52632	3.49139	3.38387	3.22431	3.04782	3.12738	3.27639	3.27375	4.31912	3.96302	4.16606	5.0037	5.08569	4.81175	5.3215	5.50679	5.1177	3.54781	4.81009	4.15595	5.53301	3.55182	3.21867	3.22584	4.1494	4.96705	5.31533
A0A0H3BZZ7	3	3	21.1949	9.49022e-06	1.52901	17835.2	Putative NrdI-like protein OS=Streptococcus pyogenes serotype M49 (strain NZ131) OX=471876 GN=nrdI2 PE=4 SV=1	0.615993	0.698617	0.641343	0.882489	0.936865	0.736554	0.610306	0.652797	0.554519	0.600199	0.586205	0.485207	0.712348	0.726805	0.646041	0.809877	0.907446	0.736921	0.838123	0.853222	0.823816	0.653201	0.686354	0.630891	0.76108	0.793015	0.727379	0.704965	0.728209	0.699137	0.651984	0.851969	0.605874	0.557204	0.695065	0.818081	0.838387	0.656815	0.760491	0.710771
A0A0H3C0B0	6	4	46.9092	2.44249e-15	5.483	49096.3	Putative nucleolar protein OS=Streptococcus pyogenes serotype M49 (strain NZ131) OX=471876 GN=Spy49_0988c PE=3 SV=1	0.104635	0.113476	0.109247	0.0641641	0.0695251	0.0889042	0.120433	0.110568	0.120556	0.0578065	0.0486853	0.0634109	0.112012	0.125456	0.139943	0.266253	0.304491	0.305599	0.103804	0.101069	0.117767	0.0777835	0.0875796	0.0942559	0.059349	0.0550751	0.045405	0.0824967	0.0716916	0.079024	0.109119	0.0741978	0.117186	0.0566343	0.125803	0.292114	0.107547	0.0865397	0.0532763	0.0777374
A0A0H3BY19	41	36	481.363	0.000887894	1.49064	68773.3	Putative oligoendopeptidase F OS=Streptococcus pyogenes serotype M49 (strain NZ131) OX=471876 GN=pepF PE=3 SV=1	13.1127	15.4795	12.8397	14.1643	16.7533	12.9059	15.6844	17.2891	14.3112	15.135	16.9008	14.0538	13.2254	14.6271	12.2741	12.2497	13.4807	12.0355	9.7656	11.8335	10.1219	12.9053	13.8565	12.4951	13.8376	14.9431	13.6915	14.5316	16.3641	14.4444	13.8106	14.6079	15.7616	15.3632	13.3755	12.5886	10.5737	13.0856	14.1574	15.1134
A0A0H3BWV7	7	7	63.2257	0.00122992	1.41601	22295.8	Putative oxidoreductase OS=Streptococcus pyogenes serotype M49 (strain NZ131) OX=471876 GN=Spy49_0734 PE=3 SV=1	11.258	12.1591	10.3406	10.1912	11.437	9.43082	11.2398	11.3797	9.62291	10.4456	10.7903	9.13561	9.21862	10.4536	9.10866	11.5566	12.6464	11.0949	13.4014	14.4959	12.8568	9.97379	11.2271	9.97763	10.1775	11.0705	9.90322	10.1946	10.9522	9.89347	11.2525	10.353	10.7475	10.1238	9.59363	11.766	13.5847	10.3928	10.3837	10.3467
A0A0H3BY64	18	16	150.087	6.21725e-15	2.09526	28181.5	Putative oxidoreductase OS=Streptococcus pyogenes serotype M49 (strain NZ131) OX=471876 GN=Spy49_1271 PE=4 SV=1	1.52898	1.62805	1.51461	2.03114	2.26661	2.11432	1.82798	1.86505	1.84237	1.7674	1.83088	1.81835	1.63446	1.59072	1.58136	1.3641	1.29052	1.32954	0.948476	1.03207	1.07973	1.7958	1.61916	1.70725	1.92559	2.00555	1.99374	2.04274	1.9881	2.01492	1.55721	2.13736	1.84514	1.80554	1.60218	1.32805	1.02009	1.7074	1.97496	2.01525
A0A0H3C0C9	5	5	52.6831	0.000899149	1.45	35092.3	Putative oxidoreductase OS=Streptococcus pyogenes serotype M49 (strain NZ131) OX=471876 GN=Spy49_1745c PE=4 SV=1	1.52117	1.51562	1.41664	1.84026	2.18354	1.55708	1.65749	1.73282	1.43196	1.37678	1.41739	1.19708	1.80953	1.59962	1.52989	1.54873	1.5386	1.46275	1.63127	1.74061	1.65885	1.65333	1.64039	1.63684	1.67679	1.82943	1.72257	2.00007	2.00126	1.78598	1.48448	1.86029	1.60742	1.33042	1.64635	1.51669	1.67691	1.64352	1.74293	1.9291
A0A0H3BYS1	10	10	73.4908	0.0603344	1.36885	54992.4	Putative PBP 5 synthesis repressor OS=Streptococcus pyogenes serotype M49 (strain NZ131) OX=471876 GN=psr PE=3 SV=1	0.835604	0.840236	0.99113	0.816935	0.732516	0.958825	0.842193	0.721792	1.015	0.780317	0.691023	0.903234	0.930525	0.742373	0.985553	1.07775	0.914981	1.24642	1.05119	0.970672	1.22856	0.88804	0.776984	0.93208	0.909239	0.757268	0.921989	0.852401	0.749	0.8294	0.88899	0.836092	0.85966	0.791525	0.88615	1.07972	1.08348	0.865701	0.862832	0.810267
A0A0H3BXI3	8	8	55.2674	6.67083e-10	1.92575	46193.2	Putative peptidoglycan branched peptide synthesis protein_ serine/alanine adding enzyme OS=Streptococcus pyogenes serotype M49 (strain NZ131) OX=471876 GN=murM.1 PE=3 SV=1	1.35841	1.5484	1.3842	1.07863	1.26354	1.33568	1.21816	1.23466	1.29112	1.04476	1.10313	1.20882	1.55656	1.63273	1.61992	1.67616	1.79672	1.80102	1.39535	1.59961	1.45107	1.33296	1.17579	1.34015	1.02284	1.07461	1.02421	0.885515	0.916547	0.936563	1.43034	1.22595	1.24798	1.1189	1.60307	1.75797	1.48201	1.28296	1.04055	0.912875
A0A0H3C1C5	17	16	264.881	0.000131972	2.13855	19346.9	Putative peroxide resistance protein OS=Streptococcus pyogenes serotype M49 (strain NZ131) OX=471876 GN=Spy49_1183c PE=3 SV=1	83.8573	101.419	71.2347	96.7302	125.479	85.8728	90.1155	102.499	70.6648	110.54	128.857	91.9279	89.7263	100.961	73.5373	50.6158	60.8549	43.4592	57.3646	70.4918	48.2918	87.6649	103.099	82.0768	95.0256	112.822	87.929	100.998	114.731	95.2685	85.5038	102.694	87.7599	110.442	88.0749	51.6433	58.7161	90.9468	98.5922	103.666
A0A0H3BXQ7	18	15	159.187	0.321737	1.31853	38937.1	Putative phosphate starvation-induced protein OS=Streptococcus pyogenes serotype M49 (strain NZ131) OX=471876 GN=phoH PE=4 SV=1	1.72978	1.51092	2.01127	1.83114	1.62695	2.06948	1.90027	1.67447	2.32092	1.77012	1.4024	2.20895	2.04129	1.61967	2.11072	2.1724	1.87688	2.3434	2.2028	1.95701	2.61768	1.83845	1.67201	1.91573	1.79321	1.56658	1.94144	1.85841	1.48347	1.7983	1.75066	1.84252	1.96522	1.79382	1.92389	2.13089	2.25917	1.80873	1.76708	1.71339
A0A0H3BZ76	15	14	200.082	1.30582e-07	1.70127	27020.2	Putative phosphoprotein phosphatase (PppL protein) OS=Streptococcus pyogenes serotype M49 (strain NZ131) OX=471876 GN=pppL PE=4 SV=1	12.452	13.2208	12.1874	14.7464	18.0681	15.0808	12.3899	13.0379	13.0197	9.0065	9.56658	10.7267	11.6216	12.8992	11.898	12.5367	13.9916	13.5003	15.6779	18.432	15.7369	12.6914	13.3659	13.2113	14.538	15.957	14.7315	14.7935	15.1231	14.4998	12.6201	15.9651	12.8158	9.76659	12.1396	13.3429	16.6156	13.0895	15.0755	14.8055
A0A0H3C000	2	2	13.6184	1.25681e-10	3.04095	25955.1	Putative phosphotransferase system (PTS)_ enzyme II component C OS=Streptococcus pyogenes serotype M49 (strain NZ131) OX=471876 GN=Spy49_0835 PE=4 SV=1	0.501541	0.521201	0.550864	0.275713	0.284155	0.210498	0.586165	0.560558	0.533349	0.712436	0.616212	0.649222	0.579	0.459661	0.507013	0.473311	0.360193	0.44189	0.419302	0.412729	0.466492	0.405907	0.448639	0.467052	0.222391	0.190032	0.237987	0.340322	0.286049	0.27393	0.524535	0.256789	0.560024	0.65929	0.515225	0.425131	0.432841	0.440533	0.216804	0.3001
A0A0H3C0G4	10	8	112.815	2.03758e-10	5.97018	30711.4	Putative phospotransferase system (PTS)_ enzyme II component D OS=Streptococcus pyogenes serotype M49 (strain NZ131) OX=471876 GN=Spy49_0836 PE=4 SV=1	2.70394	2.5551	3.32234	0.821914	0.659826	0.962847	3.31865	2.68358	3.9426	4.69798	4.20525	5.6914	3.41605	2.63214	3.75902	2.04994	1.59992	2.10717	2.29978	2.00652	2.98472	2.80369	2.33176	2.96582	1.0331	0.760816	1.09206	1.2035	0.981549	1.32432	2.86046	0.814862	3.31494	4.86488	3.26907	1.91901	2.43034	2.70043	0.96199	1.16979
A0A0H3BY93	3	3	25.6299	0	5.05733	19179.8	Putative pore-forming peptide OS=Streptococcus pyogenes serotype M49 (strain NZ131) OX=471876 GN=Spy49_0625 PE=4 SV=1	0.301465	0.285912	0.315484	0.287324	0.294718	0.317659	0.437887	0.452234	0.466279	0.378025	0.381414	0.401271	0.382297	0.36768	0.365834	0.23185	0.223835	0.233898	0.101755	0.103995	0.105871	0.293028	0.260913	0.291328	0.344541	0.315457	0.347062	0.543487	0.525736	0.506744	0.300954	0.2999	0.452133	0.386904	0.371937	0.229861	0.103873	0.281756	0.335687	0.525322
B5XJ01	12	12	119.921	0.00038564	1.8947	15733.1	Putative pre-16S rRNA nuclease OS=Streptococcus pyogenes serotype M49 (strain NZ131) OX=471876 GN=Spy49_1750c PE=3 SV=1	2.2562	2.48233	2.01223	2.96539	3.81618	2.61903	2.21573	2.65094	1.86158	2.19264	2.23058	1.9589	2.47193	2.67824	2.30517	2.08988	2.55212	1.86073	1.63878	1.86599	1.45674	2.34678	2.77618	2.22864	2.66096	3.29796	2.55887	2.91528	3.27855	2.74665	2.25026	3.13353	2.24275	2.12737	2.48511	2.16758	1.65384	2.45054	2.83927	2.98016
A0A0H3BWF5	11	9	103.273	1.38837e-11	1.63013	34804.4	Putative protease OS=Streptococcus pyogenes serotype M49 (strain NZ131) OX=471876 GN=Spy49_0499 PE=4 SV=1	1.54583	1.60659	1.50999	1.4838	1.52398	1.40734	1.45076	1.383	1.46794	1.28981	1.20853	1.26423	1.44213	1.47575	1.53091	2.08375	2.04192	2.0078	2.04912	1.75694	1.86494	1.44083	1.37391	1.44509	1.45619	1.42801	1.38977	1.38665	1.40242	1.40988	1.55413	1.47171	1.4339	1.25419	1.48293	2.04449	1.89033	1.41994	1.42466	1.39965
A0A0H3BXH1	12	12	135.624	9.32451e-05	1.5748	48426	Putative protease OS=Streptococcus pyogenes serotype M49 (strain NZ131) OX=471876 GN=Spy49_0500 PE=4 SV=1	2.00274	2.21546	1.92748	1.88007	2.13582	1.7478	2.22042	2.44987	1.98008	1.9473	2.09211	1.81697	1.85952	2.00349	1.79478	2.05285	2.24521	1.92476	1.43935	1.69723	1.36848	1.87593	1.8877	1.78009	1.90695	2.10985	1.97276	2.29764	2.449	2.34793	2.04856	1.92123	2.21679	1.95213	1.88593	2.07428	1.50169	1.84791	1.99652	2.36485
A0A0H3BZD6	11	11	120.933	0	3.18417	72658.1	Putative PTS system enzyme II OS=Streptococcus pyogenes serotype M49 (strain NZ131) OX=471876 GN=Spy49_1737c PE=4 SV=1	13.4861	12.7949	13.3064	5.13041	5.96624	5.54762	16.9	18.2368	17.8613	12.4913	13.371	13.3229	11.3082	12.1688	12.2111	6.63795	6.95622	6.91626	7.83756	8.02823	8.33061	11.2271	11.6428	11.906	6.20996	6.6797	5.80337	6.64072	7.0582	6.57784	13.1958	5.54809	17.6661	13.0618	11.896	6.83681	8.06547	11.5919	6.23101	6.75892
A0A0H3BZB3	12	9	124.608	0	7.12752	17970.4	Putative PTS system_ enzyme IIA component OS=Streptococcus pyogenes serotype M49 (strain NZ131) OX=471876 GN=Spy49_1329c PE=4 SV=1	3.1849	3.39248	3.18646	0.851606	0.786213	0.883715	3.40888	3.03809	3.44947	6.0848	6.09945	5.78804	3.31999	3.27949	3.31684	2.13188	2.09527	2.23295	2.69164	2.50018	2.65258	2.98147	2.97424	2.93108	0.928453	0.939158	0.98796	1.09175	1.08859	1.11173	3.25462	0.840511	3.29881	5.99076	3.30544	2.15336	2.6148	2.96226	0.951857	1.09736
A0A0H3C1N5	4	4	29.686	7.63722e-13	6.12269	52366	Putative PTS system_ enzyme IIC component OS=Streptococcus pyogenes serotype M49 (strain NZ131) OX=471876 GN=Spy49_1327c PE=4 SV=1	3.53484	3.95079	3.13389	1.28109	1.32555	1.83339	4.49363	4.29015	5.80235	7.81448	8.53063	10.8398	3.76956	3.86253	4.39746	1.83262	2.15617	2.53972	2.2521	2.70525	2.41487	3.65512	3.48931	4.07968	1.54787	1.54713	1.47939	1.52111	1.61311	1.7558	3.53984	1.48001	4.86204	9.06163	4.00985	2.17617	2.45741	3.74137	1.5248	1.63001
A0A0H3C2B1	38	33	305.067	0	2.86639	125459	Putative pullulanase OS=Streptococcus pyogenes serotype M49 (strain NZ131) OX=471876 GN=pulA PE=3 SV=1	2.60897	3.11856	2.77229	1.01506	1.07511	1.10135	2.60271	2.75928	2.80287	2.99124	3.05219	3.10473	2.31276	2.49528	2.46754	2.05639	2.10562	2.09999	1.79231	2.07622	1.85329	2.17264	2.14048	2.09599	1.05474	1.11422	1.06805	1.18613	1.22289	1.25638	2.83327	1.06384	2.72162	3.04939	2.42519	2.08733	1.90727	2.13637	1.07901	1.2218
A0A0H3C178	8	6	65.9138	8.50528e-07	1.41916	28661.5	Putative putative C3-degrading proteinase OS=Streptococcus pyogenes serotype M49 (strain NZ131) OX=471876 GN=cppA PE=4 SV=1	3.6042	3.6018	3.40005	3.39445	3.44973	3.19171	2.66814	2.97391	2.59322	3.41119	3.45884	3.16889	3.52614	3.64161	3.23957	3.2909	3.09246	3.18283	3.30931	3.46164	3.37661	3.45648	3.48373	3.36912	3.27347	3.45223	3.46659	3.94484	3.91161	3.83074	3.53535	3.3453	2.74509	3.34631	3.46911	3.18873	3.38252	3.43645	3.39743	3.89573
A0A0H3C2I2	14	12	90.9101	1.42395e-10	2.11115	90845.9	Putative pyruvate formate lyase 3 OS=Streptococcus pyogenes serotype M49 (strain NZ131) OX=471876 GN=pflD PE=4 SV=1	0.688963	0.771117	0.695313	0.536794	0.560169	0.529115	0.903099	0.964673	0.851218	0.745728	0.856997	0.706701	0.389166	0.475791	0.422962	0.479887	0.536002	0.482876	0.452297	0.491891	0.404973	0.457034	0.491335	0.450057	0.452812	0.550297	0.431016	0.488479	0.517105	0.498439	0.718464	0.542026	0.90633	0.769809	0.429306	0.499589	0.44972	0.466142	0.478041	0.501341
A0A0H3BWF4	9	9	114.217	2.22045e-16	1.69367	16589	Putative repressor protein OS=Streptococcus pyogenes serotype M49 (strain NZ131) OX=471876 GN=adrR PE=4 SV=1	3.28746	3.47876	3.24157	3.55253	3.63878	3.48568	3.38694	3.28711	3.33849	3.09632	3.20185	3.36117	4.01258	3.95015	3.98838	5.47111	5.17409	5.40767	4.82792	4.87159	4.96627	3.42613	3.24241	3.37363	3.27229	3.09437	3.11148	3.28459	3.35786	3.36863	3.33593	3.55899	3.33751	3.21978	3.9837	5.35095	4.88859	3.34739	3.15938	3.33703
A0A0H3BXD8	2	2	13.2457	1.29163e-05	1.50369	26918.4	Putative repressor protein OS=Streptococcus pyogenes serotype M49 (strain NZ131) OX=471876 GN=Spy49_0944 PE=4 SV=1	0.376461	0.348971	0.354075	0.353839	0.351094	0.389125	0.323152	0.320872	0.340303	0.296197	0.324561	0.253277	0.331154	0.359216	0.337634	0.429695	0.410097	0.451165	0.312918	0.29343	0.312722	0.33432	0.367779	0.317028	0.267996	0.291102	0.330972	0.326687	0.263268	0.26857	0.359836	0.364686	0.328109	0.291345	0.342668	0.430319	0.306357	0.339709	0.29669	0.286175
A0A0H3BXP9	9	8	72.0166	0.00373241	1.33274	44236.2	Putative rhamnosyltransferase OS=Streptococcus pyogenes serotype M49 (strain NZ131) OX=471876 GN=rgpAc PE=4 SV=1	1.39966	1.54194	1.28648	1.31171	1.43752	1.27003	1.35425	1.328	1.26778	1.36083	1.37017	1.34345	1.1678	1.31338	1.2191	1.28804	1.38487	1.35671	1.63317	1.7083	1.59002	1.24138	1.46249	1.21713	1.32361	1.47314	1.23818	1.34911	1.5715	1.41885	1.40936	1.33975	1.31668	1.35815	1.23343	1.34321	1.64383	1.307	1.34498	1.44649
A0A0H3BY90	19	16	219.386	3.33067e-16	2.86444	35780	Putative ribose-phosphate pyrophosphokinase OS=Streptococcus pyogenes serotype M49 (strain NZ131) OX=471876 GN=prs PE=3 SV=1	6.08622	7.08972	6.19963	5.47317	6.24128	6.06844	6.60485	6.70874	6.98924	7.07462	7.31962	7.51055	6.9178	7.39742	7.12973	12.7375	13.9224	12.4862	14.6525	16.6039	13.83	6.0451	5.95037	5.99874	5.37671	5.52493	5.32727	5.20969	5.27557	5.25478	6.45852	5.92763	6.76761	7.3016	7.14832	13.0487	15.0288	5.99807	5.40964	5.24668
A0A0H3C123	14	11	121.063	2.30097e-07	2.18778	41026.4	Putative RNA helicase OS=Streptococcus pyogenes serotype M49 (strain NZ131) OX=471876 GN=deaD2 PE=4 SV=1	1.11479	1.03621	1.12671	1.19921	1.21243	1.5654	1.37973	1.44176	1.71782	1.32164	1.42141	1.59107	1.41007	1.42099	1.82977	2.00174	2.01008	2.0968	1.05197	1.15019	1.31278	1.06192	0.987046	1.15501	0.941778	0.939346	0.911028	1.19539	1.1394	1.29978	1.09257	1.32568	1.5131	1.44471	1.55361	2.03621	1.17165	1.06799	0.930718	1.21152
A0A0H3BXN9	25	22	242.975	8.01664e-06	1.82938	50723.1	Putative RNA methyltransferase OS=Streptococcus pyogenes serotype M49 (strain NZ131) OX=471876 GN=Spy49_1072c PE=3 SV=1	4.06204	4.35448	3.65005	4.88551	5.77771	4.61588	5.25381	5.83938	4.77709	4.40618	4.54885	4.03453	3.99218	4.38892	3.94095	4.11844	4.68963	3.96755	2.80734	3.30295	2.56495	3.76605	3.92102	3.43332	4.04918	4.84097	4.21364	4.35529	4.99142	4.44585	4.02219	5.09304	5.29009	4.32985	4.10735	4.25854	2.89174	3.7068	4.36793	4.59752
A0A0H3BWW1	5	5	36.9548	2.4958e-07	1.53354	27465.8	Putative rRNA methylase OS=Streptococcus pyogenes serotype M49 (strain NZ131) OX=471876 GN=Spy49_0293 PE=4 SV=1	0.448978	0.406535	0.461024	0.428282	0.485579	0.418265	0.403169	0.423816	0.424265	0.376147	0.355586	0.391544	0.372754	0.438393	0.426614	0.519211	0.510491	0.505081	0.562606	0.538331	0.549559	0.38937	0.45393	0.386593	0.380561	0.422455	0.387877	0.360364	0.377089	0.33881	0.438846	0.444042	0.417084	0.374426	0.412587	0.511594	0.550165	0.409964	0.396965	0.358754
A0A0H3BY98	14	11	132.429	9.99201e-16	9.20638	41893.6	Putative secreted protein Streptputative secreted protein OS=Streptococcus pyogenes serotype M49 (strain NZ131) OX=471876 GN=Spy49_0015 PE=4 SV=1	0.885754	0.999545	0.903514	2.60191	3.21214	2.50569	1.76206	2.02595	1.99714	0.372155	0.376285	0.380573	1.17234	1.21324	1.15746	1.13133	1.43818	1.18396	3.39892	4.00399	2.99121	0.826637	0.935275	0.820149	0.766157	0.947141	0.777292	0.480616	0.537652	0.548449	0.929605	2.77325	1.92839	0.376337	1.18101	1.25116	3.4647	0.860687	0.830197	0.522239
A0A0H3BZ63	5	5	46.4334	3.9904e-05	1.89359	119283	Putative SNF helicase OS=Streptococcus pyogenes serotype M49 (strain NZ131) OX=471876 GN=snf PE=4 SV=1	0.427073	0.438169	0.347412	0.54986	0.596081	0.466922	0.556781	0.631459	0.457573	0.618986	0.61994	0.510607	0.404484	0.493457	0.396721	0.359746	0.413282	0.353877	0.306334	0.349517	0.268072	0.35134	0.42779	0.333357	0.388778	0.433657	0.385239	0.418581	0.476694	0.41577	0.404218	0.537621	0.548604	0.583178	0.431554	0.375635	0.307974	0.370829	0.402558	0.437015
A0A0H3C1M5	2	2	20.5299	2.50526e-10	2.17297	59373	Putative Sodium-dependent phosphate transporter OS=Streptococcus pyogenes serotype M49 (strain NZ131) OX=471876 GN=Spy49_1316c PE=4 SV=1	1.13043	1.28308	1.30853	0.960459	0.952891	1.01818	1.07061	1.16005	1.19406	1.13243	1.20986	1.23716	1.23935	1.29682	1.45144	1.79537	1.63651	1.96112	1.92258	2.1761	2.27146	1.14071	1.03396	1.23534	1.02738	0.951396	1.13868	1.13503	1.01614	1.12105	1.24068	0.977178	1.14157	1.19315	1.3292	1.79767	2.12338	1.13667	1.03915	1.09074
A0A0H3C256	5	4	37.7887	0.0114116	2.1286	42688.7	Putative specificity determinant HsdS OS=Streptococcus pyogenes serotype M49 (strain NZ131) OX=471876 GN=hsdS PE=4 SV=1	0.149838	0.121182	0.176924	0.159257	0.113963	0.205291	0.18946	0.147026	0.268184	0.207048	0.1442	0.25746	0.202903	0.154005	0.244789	0.344105	0.241818	0.367569	0.198991	0.141731	0.256795	0.172092	0.139334	0.181674	0.152501	0.121802	0.186475	0.157635	0.110745	0.180985	0.149315	0.159503	0.201557	0.202903	0.200566	0.317831	0.199172	0.164367	0.153593	0.149788
A0A0H3C024	5	3	38.1152	6.06886e-05	1.69324	35805.5	Putative sucrose operon repressor OS=Streptococcus pyogenes serotype M49 (strain NZ131) OX=471876 GN=scrR PE=4 SV=1	0.154437	0.145534	0.133508	0.102943	0.137088	0.133658	0.105047	0.106433	0.131201	0.106803	0.103948	0.113881	0.131828	0.122659	0.118423	0.178788	0.160741	0.210151	0.144616	0.171233	0.158229	0.116378	0.133976	0.127412	0.11762	0.123693	0.142856	0.116647	0.118411	0.134577	0.144493	0.124563	0.114227	0.108211	0.124303	0.183227	0.158026	0.125922	0.128057	0.123212
A0A0H3C0S1	3	3	32.6273	0.000519347	1.90077	37629.6	Putative sugar ABC transporter OS=Streptococcus pyogenes serotype M49 (strain NZ131) OX=471876 GN=Spy49_0972c PE=4 SV=1	0.671262	0.474614	0.660948	0.385707	0.396285	0.449005	0.533524	0.505639	0.61409	0.628046	0.714303	0.888405	0.705203	0.652932	0.778282	0.590428	0.605889	0.75529	0.696163	0.695153	0.948526	0.588227	0.446977	0.637183	0.433848	0.407925	0.523634	0.50262	0.543593	0.541915	0.602275	0.410332	0.551084	0.743584	0.712139	0.650536	0.779947	0.557462	0.455136	0.529376
A0A0H3BXF8	33	30	356.927	9.62099e-11	1.56451	55657.3	Putative sugar ABC transporter OS=Streptococcus pyogenes serotype M49 (strain NZ131) OX=471876 GN=Spy49_0973c PE=4 SV=1	7.54479	7.78347	7.91043	5.55476	5.7604	5.49788	7.25848	6.98715	6.34663	8.78314	8.56041	8.96055	7.82326	7.56265	7.8228	8.40572	7.41425	8.02715	8.20724	7.68859	8.91866	7.62141	7.09596	7.41377	5.85007	5.65989	5.68747	6.32361	6.04659	6.20676	7.74623	5.60434	6.86408	8.76803	7.73624	7.94904	8.27149	7.37705	5.73248	6.19232
A0A0H3BXT4	15	12	144.334	6.32827e-15	2.77482	37610.5	Putative sugar transferase OS=Streptococcus pyogenes serotype M49 (strain NZ131) OX=471876 GN=Spy49_0433 PE=4 SV=1	0.85667	0.849778	0.935776	1.05939	0.979481	1.10963	1.06679	1.02406	1.15511	1.00357	1.01283	1.12126	1.11091	1.03252	1.20289	2.53171	2.30161	2.49837	2.1428	2.01828	2.43554	0.915193	0.812691	0.938136	0.882522	0.841648	0.92619	0.902959	0.914801	1.01679	0.880741	1.0495	1.08199	1.04589	1.11544	2.4439	2.19887	0.888673	0.883453	0.944851
A0A0H3BWR4	25	21	185.618	2.12053e-14	3.31691	94746.3	Putative surface exclusion protein OS=Streptococcus pyogenes serotype M49 (strain NZ131) OX=471876 GN=prgA PE=4 SV=1	1.8162	1.92017	2.04668	1.29375	1.30954	1.49641	1.48916	1.47152	1.54573	1.02644	1.07782	1.16545	1.70642	1.68794	1.87459	2.73834	2.74835	3.06081	1.92011	1.9128	2.29527	1.61529	1.48531	1.68857	0.943722	0.878288	0.985421	0.850149	0.844813	0.881985	1.92768	1.36657	1.50214	1.0899	1.75632	2.84917	2.04272	1.59639	0.93581	0.858982
A0A0H3BXL2	2	2	12.5669	1.11022e-16	3.22547	44211.2	Putative tagatose-6-phosphate aldose/ketose isomerase OS=Streptococcus pyogenes serotype M49 (strain NZ131) OX=471876 GN=agaS PE=3 SV=1	0.130968	0.137874	0.12138	0.133743	0.133903	0.140056	0.231419	0.222679	0.241321	0.400146	0.415527	0.429419	0.170015	0.18427	0.206567	0.194887	0.214083	0.188893	0.327451	0.303472	0.350813	0.160448	0.160794	0.148145	0.120846	0.136347	0.128825	0.137335	0.150611	0.139069	0.130074	0.1359	0.231806	0.415031	0.18695	0.199287	0.327245	0.156463	0.128673	0.142338
A0A0H3BVG4	2	2	13.0411	7.81153e-13	3.08358	12441.5	Putative thioredoxin OS=Streptococcus pyogenes serotype M49 (strain NZ131) OX=471876 GN=trx.1 PE=4 SV=1	0.316638	0.434568	0.403286	0.589757	0.716	0.654114	0.535942	0.544445	0.518407	0.535123	0.59316	0.541799	0.467901	0.523684	0.484075	0.317034	0.36704	0.324279	0.262928	0.232262	0.25767	0.497988	0.49879	0.482807	0.626733	0.64008	0.599153	0.774323	0.773732	0.773445	0.384831	0.65329	0.532931	0.556694	0.491887	0.336117	0.250953	0.493195	0.621989	0.773833
A0A0H3BYG7	29	26	281.109	0.00522807	1.65305	46326.6	Putative toxic anion resistance protein OS=Streptococcus pyogenes serotype M49 (strain NZ131) OX=471876 GN=Spy49_0138c PE=3 SV=1	4.17583	4.66034	3.46957	3.42949	4.0703	3.04642	4.21228	4.65415	3.79046	4.30281	5.09759	3.81609	4.31561	4.56497	3.70314	3.82541	4.24674	3.08174	2.60888	3.2444	2.21287	3.77536	4.22549	3.63055	3.68211	4.12233	3.44674	4.52599	4.75572	4.05205	4.10192	3.5154	4.21896	4.40549	4.19457	3.71796	2.68872	3.87713	3.75039	4.44459
A0A0H3C0V2	3	3	25.7575	6.80544e-07	2.25613	38853.3	Putative transcription regulator OS=Streptococcus pyogenes serotype M49 (strain NZ131) OX=471876 GN=Spy49_1237c PE=4 SV=1	0.16252	0.176624	0.20935	0.117936	0.115543	0.150463	0.190995	0.192526	0.211049	0.280245	0.263469	0.301505	0.194512	0.167907	0.204922	0.201039	0.170573	0.221605	0.14831	0.161189	0.191839	0.169066	0.142273	0.179729	0.12163	0.121101	0.131903	0.150791	0.142819	0.192067	0.182831	0.127981	0.19819	0.28174	0.189114	0.197739	0.167113	0.163689	0.124878	0.161893
A0A0H3BYB8	14	11	112.014	4.73898e-11	1.61382	46109.6	Putative transcription regulator OS=Streptococcus pyogenes serotype M49 (strain NZ131) OX=471876 GN=Spy49_1348c PE=3 SV=1	2.97258	3.35423	2.9298	2.97429	3.17715	2.96904	3.00722	3.09094	3.12783	2.1359	2.25907	2.18029	2.55451	2.73355	2.53417	3.15181	3.23508	3.10938	2.88974	2.97392	2.68526	2.89844	3.01783	2.88437	2.72701	2.86659	2.74382	1.91407	2.09358	1.87668	3.08554	3.04016	3.07533	2.19175	2.60741	3.16543	2.84964	2.93355	2.77914	1.96144
A0A0H3BYG0	6	6	42.1408	0.000329469	1.27259	34734.7	Putative transcriptional regulator OS=Streptococcus pyogenes serotype M49 (strain NZ131) OX=471876 GN=cpsY PE=3 SV=1	1.40419	1.49792	1.43159	1.82229	1.75385	1.89116	1.56128	1.47328	1.7806	1.38902	1.40883	1.62149	1.41978	1.38338	1.49305	1.55079	1.36973	1.53536	1.72298	1.63253	1.88725	1.56225	1.48559	1.60449	1.78134	1.59815	1.76518	1.68408	1.66607	1.79243	1.44457	1.82243	1.60505	1.47311	1.43207	1.48529	1.74759	1.55078	1.71489	1.71419
A0A0H3C0C4	13	7	117.381	9.47464e-13	2.64158	14376.7	Putative transcriptional regulator OS=Streptococcus pyogenes serotype M49 (strain NZ131) OX=471876 GN=glnR PE=4 SV=1	4.26701	4.62833	4.87533	3.1634	3.22626	3.51176	2.11707	1.8581	2.2628	2.69535	2.71042	2.868	3.98866	3.55772	4.02877	1.76434	1.71391	1.98881	1.62792	1.60072	1.98439	4.63723	4.02933	4.4269	4.11553	3.32887	4.30412	4.69673	4.32307	4.58871	4.59022	3.30047	2.07932	2.75792	3.85838	1.82235	1.73768	4.36449	3.91618	4.53617
A0A0H3BXI8	8	7	80.4915	5.35783e-07	2.19892	37823	Putative transcriptional regulator OS=Streptococcus pyogenes serotype M49 (strain NZ131) OX=471876 GN=regR PE=4 SV=1	6.283	7.27548	5.47671	8.45233	10.0579	7.6078	5.923	6.26054	5.01927	5.97314	6.37527	4.91014	4.75788	5.1636	4.1636	3.8398	4.47886	3.55901	5.01389	5.94201	4.9371	6.43934	7.27482	6.19592	8.24115	9.39934	7.66541	7.86479	9.07639	7.40877	6.34506	8.70602	5.73427	5.75285	4.69503	3.95922	5.29767	6.6367	8.4353	8.11665
A0A0H3BYU9	7	6	87.5425	1.15442e-06	2.51957	25743.7	Putative transcriptional regulator OS=Streptococcus pyogenes serotype M49 (strain NZ131) OX=471876 GN=Spy49_0126c PE=4 SV=1	4.11772	4.81912	3.65207	4.05912	4.90785	3.67178	3.60162	4.35525	3.2327	4.49017	5.07952	3.70928	3.55352	4.18717	3.33603	2.6728	3.08928	2.32101	1.90994	2.23563	1.64857	3.88663	4.49649	3.67737	4.27302	4.89654	4.25384	4.6756	5.40217	4.52096	4.1963	4.21292	3.72986	4.42633	3.69224	2.69436	1.93138	4.02016	4.47447	4.86625
A0A0H3BZX0	9	8	77.3425	1.81356e-06	1.59636	37427.2	Putative transcriptional regulator OS=Streptococcus pyogenes serotype M49 (strain NZ131) OX=471876 GN=Spy49_0581 PE=3 SV=1	1.8841	2.04996	2.2095	1.99369	2.14083	2.40682	2.13331	2.1258	2.11428	2.5416	2.67755	2.8954	2.03385	1.92202	2.19474	1.85809	1.79875	2.13692	1.77205	1.84474	2.18359	2.17381	1.81539	2.20247	2.3225	2.28338	2.35671	3.01378	3.03116	3.20401	2.04785	2.18045	2.12446	2.70485	2.0502	1.93126	1.93346	2.06389	2.32086	3.08298
A0A0H3C0U1	15	12	201.858	7.33499e-09	1.44739	23339.9	Putative transcriptional regulator OS=Streptococcus pyogenes serotype M49 (strain NZ131) OX=471876 GN=Spy49_1000c PE=4 SV=1	3.61294	3.71894	3.82217	4.73214	4.93141	5.47253	3.8894	4.08956	4.30826	3.76831	3.75584	4.2599	3.91535	3.90059	4.17432	4.01728	3.90848	4.16954	4.43679	4.70092	4.74789	4.17369	4.24303	4.23778	5.3868	5.11249	5.1703	5.23874	5.20103	5.70448	3.71802	5.04536	4.09574	3.92802	3.99675	4.03177	4.62853	4.21817	5.2232	5.38142
A0A0H3BZY9	12	12	112.677	1.15688e-09	1.66473	16649.3	Putative transcriptional regulator OS=Streptococcus pyogenes serotype M49 (strain NZ131) OX=471876 GN=Spy49_1370c PE=4 SV=1	2.18034	2.33326	2.32907	1.42446	1.51204	1.55335	2.04622	2.07325	2.05486	2.27632	2.38998	2.5102	2.42921	2.45639	2.44749	2.15186	2.18638	2.29724	1.92404	1.751	2.18225	2.07742	2.01001	2.11927	2.12477	1.99027	1.98533	2.54321	2.50829	2.42287	2.28089	1.49661	2.05811	2.39217	2.44437	2.21183	1.95243	2.0689	2.03345	2.49146
A0A0H3C1V7	2	2	12.3301	0.000187227	2.20882	36912.5	Putative transcriptional regulator OS=Streptococcus pyogenes serotype M49 (strain NZ131) OX=471876 GN=Spy49_1701c PE=3 SV=1	0.0430755	0.0936312	0.086576	0.0760873	0.0732851	0.0736713	0.108352	0.0827609	0.101238	0.127961	0.127395	0.111966	0.112982	0.0997644	0.101544	0.14973	0.115215	0.162921	0.0945226	0.0741148	0.104834	0.111279	0.0757204	0.0625936	0.0750697	0.0706833	0.0839186	0.0624545	0.0600673	0.071186	0.0744276	0.0743479	0.0974503	0.12244	0.104763	0.142622	0.0911572	0.0831977	0.0765572	0.0645693
A0A0H3C087	3	2	37.1384	0.024015	1.49999	49361.1	Putative transcriptional regulator/aminotransferase OS=Streptococcus pyogenes serotype M49 (strain NZ131) OX=471876 GN=Spy49_0955 PE=3 SV=1	1.93748	2.24086	1.72397	1.76271	2.01651	1.44062	1.80393	1.81354	1.50795	1.62032	1.67998	1.31548	1.59996	1.78675	1.4568	2.0989	2.3904	1.8316	2.22546	2.65438	2.04375	1.70698	1.98281	1.57291	1.70966	2.00503	1.54119	1.68904	1.9548	1.6435	1.96744	1.73995	1.70847	1.53859	1.6145	2.10697	2.30786	1.75423	1.75196	1.76245
A0A0H3BXT6	10	7	98.4228	6.49231e-10	1.56757	26107.9	Putative transcriptional repressor OS=Streptococcus pyogenes serotype M49 (strain NZ131) OX=471876 GN=fruR PE=4 SV=1	3.38069	3.31648	3.47506	2.93186	2.94726	2.87345	2.87116	3.13933	2.99645	2.43353	2.42759	2.46747	3.92029	3.70241	3.85896	3.77776	3.58173	3.69547	3.82957	3.37248	4.28605	2.88364	2.91253	2.83867	3.21266	3.09942	3.27318	3.82422	3.60775	3.66447	3.39074	2.91752	3.00232	2.44287	3.82722	3.68499	3.82937	2.87828	3.19509	3.69881
A0A0H3C2J3	2	2	15.0346	1.05232e-10	2.9176	14519.5	Putative translation initiation inhibitor OS=Streptococcus pyogenes serotype M49 (strain NZ131) OX=471876 GN=Spy49_1707c PE=4 SV=1	1.48115	1.70858	1.53066	2.06353	2.80252	2.23221	1.42363	1.52138	1.48001	0.85467	0.946444	0.917545	1.63731	1.72174	1.49564	2.12774	2.18239	2.11997	2.57038	2.92147	2.4401	1.67797	1.65889	1.73401	1.90734	2.37252	2.14846	2.02627	2.17641	2.03661	1.57346	2.36609	1.47501	0.90622	1.61823	2.14337	2.64398	1.69029	2.14277	2.07976
A0A0H3C1W9	2	2	12.4811	1.89293e-13	6.36789	44258.5	Putative transposase OS=Streptococcus pyogenes serotype M49 (strain NZ131) OX=471876 GN=Spy49_1720c PE=4 SV=1	0.0381153	0.0602849	0.05252	0.0233222	0.029094	0.0185553	0.0386212	0.0392695	0.0283815	0.152445	0.164583	0.134911	0.0645548	0.0529611	0.0476317	0.0284057	0.0291615	0.0277004	0.0526306	0.0553551	0.0500668	0.0455611	0.0438205	0.0504569	0.038849	0.02792	0.0364599	0.0291948	0.0245279	0.0264562	0.0503068	0.0236572	0.0354241	0.150646	0.0550492	0.0284226	0.0526842	0.0466128	0.0344096	0.0267263
A0A0H3BZ06	2	2	12.6375	1.99951e-13	7.48048	44609.9	Putative trimethylamine dehydrogenase OS=Streptococcus pyogenes serotype M49 (strain NZ131) OX=471876 GN=Spy49_0965c PE=4 SV=1	0.148463	0.138343	0.127104	0.077403	0.0694286	0.0684162	0.169808	0.187028	0.166569	0.174436	0.205598	0.170652	0.156974	0.192511	0.164751	0.215214	0.242498	0.191152	0.0688241	0.0745544	0.0563161	0.0941789	0.10202	0.0904369	0.0319267	0.0253467	0.0294676	0.0383558	0.0346078	0.0460614	0.13797	0.0717493	0.174468	0.183562	0.171412	0.216288	0.0665649	0.0955454	0.0289137	0.039675
A0A0H3BYT3	3	3	19.9762	0.0862863	1.98283	21353.3	Putative tRNA (cytidine(34)-2'-O)-methyltransferase OS=Streptococcus pyogenes serotype M49 (strain NZ131) OX=471876 GN=Spy49_0306 PE=3 SV=1	0.321516	0.327612	0.452783	0.38295	0.376097	0.517814	0.325533	0.302032	0.467176	0.323666	0.260722	0.414332	0.423973	0.325259	0.472391	0.54012	0.42169	0.625118	0.23938	0.237659	0.323295	0.378605	0.269751	0.43715	0.399107	0.294167	0.481187	0.452835	0.322539	0.493167	0.367304	0.42562	0.364914	0.332907	0.407208	0.528976	0.266778	0.361835	0.391487	0.422847
A0A0H3BY63	3	3	25.6615	1.51879e-13	4.43477	30704.5	Putative two-component response regulator OS=Streptococcus pyogenes serotype M49 (strain NZ131) OX=471876 GN=Spy49_0839 PE=4 SV=1	0.217219	0.199866	0.200653	0.23313	0.248578	0.206198	0.258707	0.292461	0.254569	0.385157	0.352664	0.339739	0.258763	0.249516	0.250353	0.117531	0.145042	0.0998231	0.0789755	0.0951528	0.0688515	0.21693	0.232103	0.214789	0.242368	0.246139	0.252605	0.311566	0.329921	0.296018	0.205912	0.229302	0.268579	0.359187	0.252877	0.120799	0.0809932	0.221274	0.247038	0.312502
A0A0H3BZQ3	13	12	145.286	6.46501e-09	1.50005	23751.5	Putative two-component response regulator OS=Streptococcus pyogenes serotype M49 (strain NZ131) OX=471876 GN=Spy49_1254c PE=4 SV=1	3.34555	3.29827	3.63313	4.57638	4.24388	4.66719	3.25943	2.96716	3.609	3.19127	2.97439	3.42301	3.37751	3.19868	3.47942	3.29983	3.05263	3.32278	3.28175	3.02889	3.1088	3.90025	3.69314	3.77279	4.7327	4.55519	4.84172	4.23386	4.17175	4.61232	3.42565	4.49582	3.27853	3.19622	3.35187	3.22508	3.13981	3.78873	4.70987	4.33931
A0A0H3BVI6	10	10	119.447	0	10.3283	22771.7	Putative V-type Na+-ATPase subunit E OS=Streptococcus pyogenes serotype M49 (strain NZ131) OX=471876 GN=ntpE PE=4 SV=1	0.511581	0.470789	0.473284	0.283465	0.285062	0.235618	0.658123	0.726474	0.836901	2.64631	2.68791	2.97121	0.588344	0.577631	0.557765	0.350213	0.32889	0.369037	0.334128	0.354275	0.383717	0.632296	0.59357	0.663885	0.326927	0.296283	0.292719	0.320793	0.326306	0.338472	0.485218	0.268048	0.740499	2.76848	0.57458	0.34938	0.357373	0.629917	0.30531	0.328524
A0A0H3BW66	15	9	198.375	6.54985e-09	1.50676	40229.9	Putative Xaa-Pro dipeptidase OS=Streptococcus pyogenes serotype M49 (strain NZ131) OX=471876 GN=pepQ PE=3 SV=1	7.3245	6.90753	7.73866	9.37259	9.91699	9.49912	8.63323	8.74194	9.32467	9.68088	9.27942	9.46801	8.31441	8.29477	8.21075	8.47279	8.04592	8.60948	9.24194	9.43982	10.6847	8.49763	7.70983	8.2283	9.28055	9.53208	9.69693	10.9673	10.9484	11.1889	7.32356	9.59623	8.89994	9.4761	8.27331	8.37606	9.78883	8.14525	9.50319	11.0349
A0A0H3BWR2	7	7	67.7887	2.38135e-10	1.63005	14934.9	Putative_PNPOx domain-containing protein OS=Streptococcus pyogenes serotype M49 (strain NZ131) OX=471876 GN=Spy49_0662 PE=4 SV=1	1.90149	2.15918	1.9052	1.81996	2.0648	1.86152	1.2352	1.31786	1.14104	1.41964	1.51777	1.40863	1.86419	1.94228	1.71838	1.26655	1.33848	1.20569	1.42174	1.56514	1.51018	2.00534	2.03167	1.98454	1.60467	1.58469	1.6077	1.79906	1.68164	1.72531	1.98862	1.91543	1.23137	1.44868	1.84162	1.27024	1.49902	2.00718	1.59902	1.73534
A0A0H3BXZ3	2	2	13.9239	1.04028e-13	3.17632	25616.8	Pyridoxal phosphate homeostasis protein OS=Streptococcus pyogenes serotype M49 (strain NZ131) OX=471876 GN=Spy49_1172c PE=3 SV=1	0.192505	0.201957	0.175837	0.225701	0.238412	0.221659	0.206845	0.218476	0.200498	0.148386	0.158382	0.160274	0.221669	0.204775	0.194467	0.335358	0.370288	0.316747	0.109491	0.105099	0.10729	0.169637	0.158346	0.164083	0.175092	0.175469	0.164605	0.209338	0.201421	0.195751	0.1901	0.228591	0.208607	0.155681	0.20697	0.340797	0.107293	0.164022	0.171722	0.20217
B5XK96	15	13	195.385	5.9952e-12	1.48282	23359.8	Pyrrolidone-carboxylate peptidase OS=Streptococcus pyogenes serotype M49 (strain NZ131) OX=471876 GN=pcp PE=3 SV=1	11.6479	12.0183	12.25	14.2963	15.4059	14.4168	14.0427	14.4999	13.0857	12.5639	12.2247	12.1304	11.6455	11.1042	11.5	12.9967	12.8702	12.2782	9.87359	9.85045	10.0294	12.8477	12.7221	12.6842	14.2318	14.0289	14.6344	14.1583	13.5507	14.1605	11.9721	14.7063	13.8761	12.3063	11.4166	12.715	9.91781	12.7514	14.2984	13.9565
A0A0H3BX31	7	5	61.1055	2.85455e-07	1.8761	27471	Pyrroline-5-carboxylate reductase OS=Streptococcus pyogenes serotype M49 (strain NZ131) OX=471876 GN=proC PE=3 SV=1	0.849947	1.02388	0.830811	0.73025	0.904626	0.741163	0.908329	0.943015	0.814543	0.985483	1.05253	0.955762	0.937314	1.03136	0.848949	1.16776	1.19245	1.02833	1.52939	1.58396	1.34434	0.882004	0.946838	0.851213	0.801373	0.919575	0.79982	0.862891	0.914578	0.812059	0.901545	0.792013	0.888629	0.997926	0.939209	1.12951	1.4859	0.893351	0.840256	0.863176
A0A0H3BYN2	20	16	229.394	2.34862e-05	1.42081	35990.2	Pyruvate dehydrogenase E1 component alpha subunit OS=Streptococcus pyogenes serotype M49 (strain NZ131) OX=471876 GN=acoA PE=4 SV=1	9.83274	10.1358	11.3001	12.1668	13.7603	15.1905	12.5496	13.6675	14.8464	10.5975	10.8734	12.6722	13.7014	14.0926	15.487	13.4034	14.4467	15.8575	12.8455	14.0802	13.9838	11.1034	10.0735	11.5478	9.68986	9.92459	11.1481	11.4764	11.3646	12.6759	10.4229	13.7059	13.6878	11.381	14.427	14.5692	13.6365	10.9082	10.2542	11.839
A0A0H3BZX8	28	27	385.912	5.76742e-09	1.52287	35967.7	Pyruvate dehydrogenase E1 component beta subunit OS=Streptococcus pyogenes serotype M49 (strain NZ131) OX=471876 GN=acoB PE=4 SV=1	18.1809	17.4257	18.9477	22.7883	20.0915	22.6906	20.5799	19.728	22.24	17.9011	16.2967	18.3755	24.6885	22.3964	24.8966	27.1586	25.0025	26.7559	26.924	25.5323	26.937	20.7356	18.6201	19.2063	17.5357	16.0825	18.5156	17.3967	17.2946	19.1946	18.1848	21.8568	20.8493	17.5244	23.9938	26.3057	26.4644	19.5207	17.378	17.9619
A0A0H3BZ80	6	6	41.8129	0	3.64258	33410.1	Pyruvate formate-lyase-activating enzyme OS=Streptococcus pyogenes serotype M49 (strain NZ131) OX=471876 GN=pflC PE=3 SV=1	0.488549	0.493549	0.452375	0.254408	0.225066	0.228571	0.511449	0.480747	0.473787	0.627241	0.609351	0.596101	0.450818	0.444441	0.457438	0.549678	0.561025	0.532903	0.573105	0.573073	0.561208	0.326902	0.346107	0.298667	0.157591	0.189438	0.156102	0.177408	0.187155	0.171022	0.478157	0.236015	0.488661	0.610897	0.450899	0.547869	0.569128	0.323892	0.16771	0.178528
A0A0H3BYL1	51	44	774.325	5.49315e-05	1.56776	54592.2	Pyruvate kinase OS=Streptococcus pyogenes serotype M49 (strain NZ131) OX=471876 GN=pyk PE=3 SV=1	69.2835	70.4302	76.1807	65.1598	64.4538	70.405	61.6044	57.9468	71.2612	54.6406	51.8487	63.1791	64.8534	60.8275	70.7384	85.0089	73.2381	83.7551	89.2109	85.907	90.8812	73.6857	63.7989	74.3354	70.397	66.1955	75.1303	68.4657	61.9376	72.8923	71.9648	66.6729	63.6041	56.5562	65.4731	80.6674	88.6664	70.6067	70.5743	67.7652
B5XJL3	19	17	213.988	2.23945e-08	1.61032	43412.3	Queuine tRNA-ribosyltransferase OS=Streptococcus pyogenes serotype M49 (strain NZ131) OX=471876 GN=tgt PE=3 SV=1	5.98951	6.22368	5.44892	5.21899	5.80659	5.08368	6.14456	6.6307	5.65905	6.60807	7.02089	6.41114	6.39323	6.6316	5.82692	8.20048	8.8815	7.74662	8.15896	9.5366	8.24551	5.74024	6.1781	5.75411	5.44575	5.60694	5.35804	5.46392	5.82681	5.43204	5.88737	5.36975	6.14477	6.68003	6.28391	8.2762	8.64702	5.89081	5.47025	5.57426
A0A0H3BVM1	11	10	99.5986	0	48.2704	31745.2	Quinolinate phosphoribosyltransferase [decarboxylating] OS=Streptococcus pyogenes serotype M49 (strain NZ131) OX=471876 GN=Spy49_0176 PE=1 SV=1	0.0689717	0.0720752	0.0879969	0.0713275	0.0626538	0.0811949	0.0838952	0.0863765	0.0893469	0.10782	0.112898	0.125229	0.0956157	0.0984416	0.104589	3.52643	3.76544	3.09478	2.57453	2.95299	2.37344	0.0791723	0.0761552	0.0812639	0.0741445	0.0710547	0.0753319	0.200914	0.209656	0.184414	0.0763479	0.0717254	0.0865395	0.115315	0.0995489	3.46222	2.63365	0.0788638	0.0735104	0.198328
A0A0H3BZ03	23	21	337.091	5.46284e-06	1.57451	33808	R3H domain protein OS=Streptococcus pyogenes serotype M49 (strain NZ131) OX=471876 GN=Spy49_0209 PE=4 SV=1	26.4613	27.2384	24.7859	27.8667	31.8085	25.2086	26.0443	27.4449	24.1291	17.8376	19.174	16.8997	23.5573	25.5501	23.1839	26.8548	29.3735	25.1019	24.4187	25.8138	23.7948	25.8327	27.4879	24.692	26.4457	28.5016	26.0669	24.275	26.3974	23.7738	26.1618	28.2946	25.8728	17.9704	24.0971	27.11	24.6758	26.0042	27.0048	24.8154
B5XLG8	16	13	154.93	2.51568e-05	1.29494	23884.3	Redox-sensing transcriptional repressor Rex OS=Streptococcus pyogenes serotype M49 (strain NZ131) OX=471876 GN=rex PE=3 SV=1	6.15277	6.89006	6.53178	6.36586	7.06777	6.53181	6.83583	6.40615	6.45442	7.11475	7.39871	6.62816	6.61414	6.28575	6.43667	8.38926	7.75219	7.95564	7.37583	7.06425	8.20869	6.47016	5.88791	6.25061	6.23035	6.55047	6.63184	6.33179	6.49555	6.20914	6.52487	6.65515	6.56547	7.0472	6.44552	8.03236	7.54959	6.20289	6.47089	6.34549
A0A0H3C223	11	8	87.6727	3.12865e-11	1.8342	50738.8	Replicative DNA helicase OS=Streptococcus pyogenes serotype M49 (strain NZ131) OX=471876 GN=dnaC PE=3 SV=1	0.688586	0.758483	0.667843	0.658892	0.653724	0.573116	0.709907	0.795833	0.684903	0.698367	0.74398	0.650265	0.698148	0.76316	0.690568	1.13491	1.2233	1.09289	1.06898	1.13628	1.02049	0.625079	0.696007	0.588024	0.627193	0.646139	0.608191	0.653986	0.661685	0.648213	0.704971	0.628577	0.730214	0.697537	0.717292	1.15037	1.07525	0.63637	0.627174	0.654628
A0A0H3BVU9	26	22	363.285	1.89184e-05	1.59753	26575.8	Response regulator CsrR OS=Streptococcus pyogenes serotype M49 (strain NZ131) OX=471876 GN=csrR PE=4 SV=1	14.6872	17.3629	14.3425	15.7785	19.6308	16.5555	17.1754	17.8272	16.1917	12.5518	14.6376	12.5702	15.6027	16.1852	14.6591	17.698	18.3881	17.1722	20.131	23.155	20.231	14.7957	15.042	14.7904	15.8254	17.4983	16.2243	15.8351	16.6413	15.0776	15.4642	17.3216	17.0648	13.2532	15.4823	17.7528	21.1723	14.876	16.516	15.8514
A0A0H3BXQ4	17	13	177.687	2.56283e-06	1.83143	68818.3	RgpFc protein OS=Streptococcus pyogenes serotype M49 (strain NZ131) OX=471876 GN=rgpFc PE=4 SV=1	2.73656	2.95432	2.49629	2.18531	2.49361	1.89726	3.10894	3.37846	2.71778	3.67939	3.8276	3.06727	3.04576	2.96088	2.75082	4.12079	4.29162	3.63138	2.60381	2.881	2.40346	2.41445	2.6354	2.27206	2.25352	2.47937	2.09739	2.90143	3.0425	2.61027	2.72906	2.19206	3.06839	3.52476	2.91915	4.0146	2.62942	2.44064	2.27676	2.8514
A0A0H3BY85	5	5	44.8314	0.00290179	1.49963	36243.6	Rhamnosyltransferase OS=Streptococcus pyogenes serotype M49 (strain NZ131) OX=471876 GN=rgpBc PE=4 SV=1	0.697125	0.77446	0.593848	0.570556	0.662155	0.479905	0.599687	0.662188	0.517552	0.576051	0.610599	0.469203	0.564429	0.640203	0.52942	0.742198	0.885116	0.675269	0.838695	0.901825	0.700386	0.554376	0.660114	0.526851	0.522946	0.607762	0.496963	0.54315	0.613102	0.518602	0.688478	0.570872	0.593142	0.551951	0.578017	0.767528	0.813635	0.580447	0.542557	0.558284
A0A0H3BZ28	8	7	71.0769	0.000927107	1.37956	15074.7	Rhodanese domain-containing protein OS=Streptococcus pyogenes serotype M49 (strain NZ131) OX=471876 GN=Spy49_1180c PE=4 SV=1	1.66764	1.87232	1.90652	1.3161	1.24589	1.38597	1.59344	1.61805	1.82071	1.52564	1.5148	1.84876	1.59716	1.44536	1.64017	1.70916	1.54848	1.83268	1.52431	1.39962	1.52983	1.65919	1.52331	1.68838	1.42289	1.34276	1.50131	1.49752	1.36801	1.53797	1.81549	1.31599	1.6774	1.62973	1.5609	1.69677	1.48459	1.62363	1.42232	1.46783
B5XKB7	5	5	34.9146	9.0572e-13	1.6403	25989.8	Ribonuclease 3 OS=Streptococcus pyogenes serotype M49 (strain NZ131) OX=471876 GN=rnc PE=3 SV=1	0.774872	0.817692	0.771755	0.79701	0.875356	0.798394	0.711417	0.724461	0.753346	0.741492	0.717135	0.800463	0.801627	0.781849	0.784351	1.16981	1.18548	1.13116	1.24864	1.13041	1.21194	0.77893	0.739464	0.829921	0.847018	0.794494	0.815479	0.848878	0.850075	0.86878	0.788106	0.823587	0.729741	0.75303	0.789276	1.16215	1.197	0.782772	0.818997	0.855911
B5XI49	2	2	12.4275	5.3929e-06	8.55553	32630.6	Ribonuclease HIII OS=Streptococcus pyogenes serotype M49 (strain NZ131) OX=471876 GN=rnhC PE=3 SV=1	0.0958781	0.0797646	0.140539	0.101533	0.0803459	0.1614	0.0798274	0.0880845	0.131525	0.0876675	0.0748001	0.129005	0.191401	0.155049	0.25131	0.22028	0.206149	0.273834	0.0150677	0.0228401	0.0439415	0.110947	0.0848838	0.139057	0.0666179	0.0454625	0.0811291	0.0961422	0.0677702	0.116235	0.105394	0.114426	0.0998124	0.0971576	0.199253	0.233421	0.0272831	0.111629	0.0644032	0.0933824
A0A0H3BYT4	38	33	442.257	0.0415401	1.12564	61268.4	Ribonuclease J OS=Streptococcus pyogenes serotype M49 (strain NZ131) OX=471876 GN=rnj PE=3 SV=1	8.90065	8.74993	9.94947	9.80793	10.1731	10.1244	9.31769	8.74103	9.97939	9.23465	8.18519	9.76406	8.73006	8.82869	9.1863	10.1792	9.70309	9.5726	10.058	9.59722	10.3454	9.54937	9.54403	9.47908	9.98351	9.58796	10.0942	10.0689	9.54778	9.73204	9.20002	10.0351	9.34604	9.0613	8.91502	9.81831	10.0002	9.52416	9.88856	9.78291
A0A0H3BZX3	32	27	360.274	0.000705025	1.29111	61176.3	Ribonuclease J OS=Streptococcus pyogenes serotype M49 (strain NZ131) OX=471876 GN=rnj PE=3 SV=1	8.10541	8.51399	8.97924	9.85093	9.8895	10.3522	9.20466	9.09965	10.3647	8.68091	8.3703	10.4584	9.37357	9.15093	9.46429	10.5199	11.1822	11.3485	8.44536	8.27409	8.99583	8.94729	8.59862	8.90325	8.34274	8.47085	9.33652	8.86808	8.83289	9.77496	8.53288	10.0309	9.55635	9.16987	9.3296	11.0169	8.57176	8.81639	8.7167	9.15864
B5XJN7	2	2	19.4913	0.000292934	1.52686	13866.1	Ribonuclease P protein component OS=Streptococcus pyogenes serotype M49 (strain NZ131) OX=471876 GN=rnpA PE=3 SV=1	0.331346	0.315815	0.299516	0.469711	0.536724	0.384984	0.400687	0.429082	0.405112	0.502577	0.503629	0.439236	0.412926	0.447858	0.394791	0.310288	0.36324	0.304354	0.330554	0.391423	0.331571	0.378908	0.382315	0.397054	0.407508	0.470809	0.385106	0.429086	0.500254	0.398858	0.315559	0.463806	0.411627	0.481814	0.418525	0.325961	0.351183	0.386092	0.421141	0.442733
A0A0H3BZ26	11	9	71.0869	7.4746e-11	1.43035	87601.3	Ribonuclease R OS=Streptococcus pyogenes serotype M49 (strain NZ131) OX=471876 GN=vacB PE=3 SV=1	0.614586	0.693865	0.632473	0.809916	0.855116	0.775399	0.637112	0.675972	0.623854	0.682405	0.648988	0.66737	0.773286	0.739265	0.698778	0.905582	0.893978	0.927254	0.889205	0.956807	0.924487	0.70542	0.694559	0.722311	0.746035	0.72531	0.718259	0.662583	0.634635	0.67303	0.646975	0.813477	0.645646	0.666255	0.73711	0.908938	0.9235	0.70743	0.729868	0.656749
A0A0H3BY61	32	25	332.196	5.05326e-06	1.28976	60381.1	Ribonuclease Y OS=Streptococcus pyogenes serotype M49 (strain NZ131) OX=471876 GN=rny PE=3 SV=1	8.55244	9.83255	8.71625	9.16718	10.2351	9.72117	9.53266	8.87771	9.25296	8.43649	8.59819	8.11572	8.14865	8.24416	8.09161	9.18928	8.94978	9.6568	9.70861	9.26603	10.4599	8.58449	8.75981	8.70943	8.91196	8.9074	8.97509	7.70033	7.66835	7.45303	9.03375	9.70781	9.22111	8.38347	8.16147	9.26529	9.81153	8.68457	8.93148	7.60724
B5XL36	24	20	251.014	1.51754e-07	1.53379	34627.7	Ribonuclease Z OS=Streptococcus pyogenes serotype M49 (strain NZ131) OX=471876 GN=rnz PE=3 SV=1	2.71218	3.12219	2.98711	3.03185	3.55527	3.42241	2.69182	2.82764	2.93024	2.27745	2.90079	2.70173	2.69428	2.89714	2.75065	3.58164	3.5505	3.71247	3.68464	4.1552	4.13202	2.63624	2.64871	2.7156	2.52165	2.7522	2.7982	2.53324	2.60528	2.66689	2.9405	3.33651	2.81657	2.62666	2.78069	3.61487	3.99062	2.66685	2.69068	2.60181
A0A0H3BXR4	45	37	526.313	0.000401281	1.82592	81754.4	Ribonucleoside-diphosphate reductase OS=Streptococcus pyogenes serotype M49 (strain NZ131) OX=471876 GN=nrdE1 PE=3 SV=1	5.05207	4.62199	5.92955	6.08329	5.47961	6.69672	6.12198	5.02491	6.5992	4.87323	3.5013	5.57991	5.74351	5.01666	5.92393	9.05054	7.19306	9.23607	8.09027	7.01591	9.5108	5.4067	4.86533	5.96212	5.51417	4.63887	5.79105	5.86129	4.33684	5.16978	5.2012	6.08654	5.91536	4.65148	5.56137	8.49322	8.20566	5.41139	5.3147	5.12263
A0A0H3BZB8	18	17	226.661	2.22045e-16	2.14069	37019.4	Ribonucleoside-diphosphate reductase subunit beta OS=Streptococcus pyogenes serotype M49 (strain NZ131) OX=471876 GN=Spy49_1099 PE=3 SV=1	6.52963	6.0615	6.08996	6.6493	6.73724	6.38994	7.37626	7.25311	6.8206	4.45628	4.47816	4.4124	6.39678	6.29774	6.03226	9.84846	9.29143	9.43162	8.551	9.08057	8.78956	5.5621	5.95142	5.57739	6.19741	6.40714	6.20226	6.79652	6.59836	6.67748	6.22703	6.59216	7.14999	4.44895	6.24226	9.52384	8.80704	5.69697	6.26893	6.69079
A0A0H3C205	50	39	440.462	7.70705e-09	1.49269	83583.5	Ribonucleotide reductase of class III (Anaerobic)_ large subunit OS=Streptococcus pyogenes serotype M49 (strain NZ131) OX=471876 GN=nrdD PE=4 SV=1	6.42751	6.84638	6.17081	5.80121	6.1236	5.54901	5.5199	5.719	5.46737	4.63801	4.72259	4.37901	5.68507	5.8581	5.52608	6.8812	7.01381	6.61391	6.73643	6.769	6.56803	5.76316	6.2907	5.36106	5.44645	5.88154	5.46716	4.96289	5.23389	5.21449	6.48157	5.82461	5.56876	4.57987	5.68975	6.83631	6.69115	5.80497	5.59838	5.13709
A0A0H3BZK8	2	2	13.3628	0.0144145	1.91406	36737.9	Ribose operon repressor OS=Streptococcus pyogenes serotype M49 (strain NZ131) OX=471876 GN=Spy49_1187c PE=4 SV=1	0.269301	0.31834	0.254422	0.303339	0.328234	0.223498	0.321135	0.280461	0.225395	0.304764	0.260274	0.247512	0.213572	0.289494	0.146438	0.306034	0.143289	0.113958	0.232914	0.255584	0.186824	0.22389	0.240185	0.247252	0.342047	0.351834	0.309586	0.387191	0.363123	0.327842	0.280688	0.285024	0.275664	0.27085	0.216502	0.18776	0.225107	0.237109	0.334489	0.359385
B5XL07	14	9	121.998	3.68085e-05	1.85769	24320	Ribose-5-phosphate isomerase A OS=Streptococcus pyogenes serotype M49 (strain NZ131) OX=471876 GN=rpiA PE=3 SV=1	3.73833	3.02815	4.23718	3.07558	2.58249	3.31255	3.44651	3.07284	3.91642	3.95296	3.36831	4.51047	3.83204	3.36387	3.996	5.37497	4.53993	5.9113	5.19881	4.72584	6.09639	3.87735	3.24088	4.05578	3.05493	2.59415	3.24825	2.92491	2.49515	3.2041	3.66789	2.99021	3.47859	3.94391	3.73064	5.2754	5.34034	3.72467	2.96578	2.87472
A0A0H3BYN6	22	17	257.071	1.64232e-07	1.68782	35214.7	Ribose-phosphate pyrophosphokinase OS=Streptococcus pyogenes serotype M49 (strain NZ131) OX=471876 GN=prsA PE=3 SV=1	12.2758	11.9884	13.7502	9.94393	9.1326	10.4914	11.0796	10.8607	12.5467	13.7535	13.2675	16.2691	13.7016	13.4905	14.5672	16.4008	15.4734	18.0313	16.2122	16.8789	16.3594	13.6268	11.6584	12.8681	10.085	9.71573	11.5161	11.5819	10.6317	12.4173	12.6715	9.85599	11.4957	14.43	13.9198	16.6352	16.4835	12.7177	10.4389	11.5436
B5XIN3	8	7	76.8865	0.194778	1.45698	34259.5	Ribosomal protein L11 methyltransferase OS=Streptococcus pyogenes serotype M49 (strain NZ131) OX=471876 GN=prmA PE=3 SV=1	1.33723	1.40678	1.65104	1.26546	1.44702	1.90254	1.32297	1.42575	2.06237	1.43528	1.47639	2.03056	1.83416	1.73036	2.24417	1.88552	1.8884	2.49272	1.52563	1.70433	1.87287	1.61324	1.35568	1.80014	1.37431	1.29119	1.6356	1.62252	1.27312	1.82088	1.46502	1.53834	1.6037	1.64741	1.93623	2.08888	1.70095	1.58968	1.4337	1.57218
A0A0H3BZ13	15	13	130.211	3.68467e-07	1.29179	32732	Ribosomal RNA small subunit methyltransferase A OS=Streptococcus pyogenes serotype M49 (strain NZ131) OX=471876 GN=ksgA PE=3 SV=1	2.43249	2.46532	2.36841	2.44896	2.52072	2.58727	2.23425	2.24781	2.43956	2.39609	2.59059	2.51101	2.2568	2.31533	2.46097	2.79606	2.80038	2.83422	2.81431	3.00304	3.12397	2.4732	2.41445	2.45263	2.417	2.51349	2.40523	2.26863	2.48958	2.42052	2.42207	2.51898	2.30721	2.49923	2.34437	2.81022	2.98044	2.44676	2.44524	2.39291
A0A0H3C2C3	3	3	24.5186	1.67313e-10	2.72501	27468	Ribosomal RNA small subunit methyltransferase E OS=Streptococcus pyogenes serotype M49 (strain NZ131) OX=471876 GN=Spy49_1637c PE=3 SV=1	0.097106	0.0814076	0.0901342	0.0879485	0.0946733	0.0882613	0.117749	0.124065	0.108083	0.102331	0.11171	0.107452	0.178668	0.122008	0.160864	0.234631	0.211943	0.217857	0.103136	0.111542	0.112962	0.0900259	0.103542	0.0875764	0.0789536	0.0911326	0.0737402	0.144594	0.14068	0.123435	0.0895493	0.0902944	0.116633	0.107164	0.153846	0.221477	0.109213	0.0937148	0.0812755	0.136236
B5XJV1	11	9	94.5374	2.1213e-07	1.55194	26912.2	Ribosomal RNA small subunit methyltransferase G OS=Streptococcus pyogenes serotype M49 (strain NZ131) OX=471876 GN=rsmG PE=3 SV=1	0.731196	0.74983	0.669148	0.688679	0.758292	0.642435	0.684343	0.798486	0.637791	0.710901	0.68817	0.645954	0.793219	0.78394	0.719517	1.00101	1.13479	0.954393	0.984234	1.15248	1.02767	0.708423	0.76131	0.688347	0.627893	0.726629	0.684464	0.753936	0.80232	0.762662	0.716725	0.696469	0.706873	0.681675	0.765559	1.03006	1.05479	0.71936	0.679662	0.772973
B5XML3	8	8	68.7559	0.00190833	1.51455	35715.2	Ribosomal RNA small subunit methyltransferase H OS=Streptococcus pyogenes serotype M49 (strain NZ131) OX=471876 GN=rsmH PE=3 SV=1	1.82189	1.76738	1.64159	1.9302	2.12319	1.76537	1.84109	2.09067	1.63025	1.60108	1.65353	1.42484	1.76935	1.99257	1.7043	2.29881	2.70943	2.07905	1.93823	2.10039	1.7092	1.60313	1.73441	1.55182	1.68592	1.83466	1.49966	1.80128	1.86413	1.69828	1.74362	1.93959	1.854	1.55982	1.82207	2.36243	1.91594	1.62979	1.67341	1.7879
A0A0H3BZ92	12	11	113.235	1.09842e-10	1.57756	31987.5	Ribosomal RNA small subunit methyltransferase I OS=Streptococcus pyogenes serotype M49 (strain NZ131) OX=471876 GN=rsmI PE=3 SV=1	2.54896	2.74725	2.5868	2.47913	2.51303	2.27484	2.51983	2.32561	2.52112	2.19259	2.03819	2.00039	2.18847	2.23638	2.2452	3.09843	3.20591	3.0726	3.2174	3.32623	3.28643	2.45592	2.55982	2.43279	2.33127	2.50301	2.23131	2.39143	2.51455	2.30343	2.62767	2.42233	2.45552	2.07705	2.22335	3.12565	3.27669	2.48285	2.3552	2.40313
A0A0H3BYQ6	6	6	61.7757	0.00090611	1.29021	14099	Ribosomal silencing factor RsfS OS=Streptococcus pyogenes serotype M49 (strain NZ131) OX=471876 GN=rsfS PE=3 SV=1	5.05452	5.52128	4.99061	5.47036	5.61931	4.90094	4.98812	5.20834	4.50542	4.22339	4.41671	4.02454	5.18493	4.87316	4.57104	5.4122	5.76306	5.1648	5.06583	5.63177	5.24757	5.15887	4.92577	4.72928	5.01116	4.96876	5.05837	5.15964	4.87405	4.91632	5.18881	5.3302	4.90063	4.22154	4.87638	5.44669	5.31506	4.93797	5.01276	4.98334
A0A0H3BYR8	2	2	46.5435	0.896102	1.31114	3567.16	Ribosomal_L12_N domain-containing protein OS=Streptococcus pyogenes serotype M49 (strain NZ131) OX=471876 GN=Spy49_0847 PE=3 SV=1	127.015	160.705	108.27	123.162	162.556	86.6485	120.37	143.443	84.3123	107.079	123.834	75.5408	114.091	136.106	88.3552	125.601	153.667	98.779	131.009	163.589	107.205	112.242	135.66	99.8104	118.135	143.751	107.719	123.485	145.119	113.06	131.997	124.122	116.042	102.151	112.851	126.016	133.934	115.904	123.202	127.221
A0A0H3BYC2	24	15	200.327	1.82553e-05	1.4974	32094.5	Ribosome biogenesis GTPase A OS=Streptococcus pyogenes serotype M49 (strain NZ131) OX=471876 GN=Spy49_0912 PE=3 SV=1	3.34969	3.35524	3.16253	3.28063	3.77749	3.13181	3.09015	3.33432	2.96263	3.08611	3.03473	2.836	3.04496	3.32852	2.85886	3.6906	4.12595	3.6935	3.112	3.28285	3.12895	3.27623	3.43342	3.16317	3.06649	3.36027	3.00606	2.51911	2.61986	2.54772	3.28915	3.39664	3.12903	2.98561	3.07745	3.83668	3.1746	3.29094	3.14427	2.56223
A0A0H3BY45	15	12	199.407	0.00763758	1.09963	20856.8	Ribosome hibernation promoting factor OS=Streptococcus pyogenes serotype M49 (strain NZ131) OX=471876 GN=hpf PE=3 SV=1	52.8196	56.134	55.2158	53.7015	58.8532	56.5688	51.2358	51.9686	53.1468	54.3995	54.5657	54.9761	53.1647	51.7206	51.9702	52.0392	50.2039	53.5139	49.3128	51.767	53.6715	55.8731	52.4474	57.2468	53.8002	53.3113	52.9132	50.7999	50.7383	52.2627	54.7231	56.3745	52.1171	54.6471	52.2852	51.919	51.5837	55.1891	53.3416	51.267
B5XKX3	13	11	121.326	0.0221118	1.79455	19994.9	Ribosome maturation factor RimM OS=Streptococcus pyogenes serotype M49 (strain NZ131) OX=471876 GN=rimM PE=3 SV=1	3.77191	3.81373	4.6069	3.68954	3.74696	5.51079	3.52971	3.3996	5.01506	3.34905	3.47189	5.60707	4.1167	4.05709	5.46927	6.28113	5.73727	8.10923	4.67959	5.12237	5.9079	4.40448	3.58022	4.62945	4.10856	3.62149	4.47872	3.69027	3.45717	4.06855	4.06418	4.31576	3.98146	4.14267	4.54769	6.70921	5.23662	4.20472	4.06959	3.73866
B5XHV7	4	4	36.6459	1.19821e-11	2.82381	19688.8	Ribosome maturation factor RimP OS=Streptococcus pyogenes serotype M49 (strain NZ131) OX=471876 GN=rimP PE=3 SV=1	1.02753	0.987318	1.13101	0.993527	1.15085	1.13464	0.70968	0.743012	0.77493	0.718324	0.789237	0.882035	1.17523	1.16071	1.32471	1.42572	1.41191	1.62651	1.8796	2.06075	2.35004	1.01922	0.90804	1.04787	0.798111	0.832509	0.872092	0.888362	0.922857	1.03812	1.04862	1.09301	0.742541	0.796532	1.22022	1.48805	2.0968	0.991708	0.834237	0.949779
A0A0H3BYL9	32	26	372.212	1.52047e-09	1.56398	41096.7	Ribosome-binding ATPase YchF OS=Streptococcus pyogenes serotype M49 (strain NZ131) OX=471876 GN=ychF PE=3 SV=1	9.1355	10.5938	9.75013	8.44391	9.29111	9.4752	8.83269	9.16521	9.22172	8.13341	8.65289	8.38563	8.99806	9.68503	9.23455	11.0851	11.3763	11.4459	12.7219	13.6036	13.0429	9.76048	9.16972	9.98418	9.15248	8.76459	9.47925	9.66884	9.33972	9.42819	9.82649	9.07007	9.07321	8.39064	9.30588	11.3024	13.1228	9.63813	9.13211	9.47892
B5XHV2	19	15	211.945	1.29223e-08	1.5607	13268.3	Ribosome-binding factor A OS=Streptococcus pyogenes serotype M49 (strain NZ131) OX=471876 GN=rbfA PE=3 SV=1	12.2301	12.2501	12.9485	13.321	12.5392	13.0562	9.97604	9.26055	10.5673	8.84761	9.0603	9.90543	11.654	10.7368	11.6813	13.1488	11.825	12.7199	14.7034	13.7508	14.9541	12.3359	12.2843	12.4459	13.0533	11.9266	12.5833	11.9819	11.4042	12.7603	12.4762	12.9722	9.93461	9.27112	11.3574	12.5646	14.4694	12.3554	12.5211	12.0488
B5XK64	20	17	284.518	7.3525e-08	1.72842	20572.5	Ribosome-recycling factor OS=Streptococcus pyogenes serotype M49 (strain NZ131) OX=471876 GN=frr PE=3 SV=1	24.8861	28.8449	25.4687	26.5473	30.7828	24.6127	22.9697	24.017	20.9153	22.1483	22.7124	20.2104	26.9672	27.3174	25.3026	32.1963	33.2731	29.7328	36.5104	39.4635	36.4961	26.3246	27.6035	25.231	25.4167	26.7558	25.0529	25.7609	26.8001	25.2994	26.3999	27.3143	22.634	21.6903	26.5291	31.7341	37.49	26.3864	25.7418	25.9535
A0A0H3BWQ8	4	3	36.951	2.11022e-11	2.4194	23913.4	Ribulose-phosphate 3-epimerase OS=Streptococcus pyogenes serotype M49 (strain NZ131) OX=471876 GN=rpe PE=3 SV=1	0.710486	0.81719	0.822512	1.01606	1.25348	1.04851	1.21361	1.35736	1.08102	1.27307	1.26957	1.25077	1.42157	1.43066	1.4309	1.85036	2.01311	1.82257	0.855317	0.966835	0.884467	1.09392	1.12557	1.11877	1.1737	1.20125	1.12705	1.51745	1.39298	1.51741	0.783396	1.10602	1.21733	1.26447	1.42771	1.89535	0.902206	1.11275	1.16733	1.47595
A0A0H3BZH9	32	26	440.187	1.40431e-10	1.39724	42270.3	RNA polymerase sigma factor SigA OS=Streptococcus pyogenes serotype M49 (strain NZ131) OX=471876 GN=rpoD PE=3 SV=1	24.1831	24.8433	25.6137	27.9476	31.1483	29.8325	23.0256	23.6171	24.6734	23.0983	23.1299	22.9938	21.5294	21.6492	21.1358	21.0418	21.1785	21.4253	21.8488	21.6037	24.2487	26.804	24.911	26.8356	29.3259	28.0843	30.186	28.0608	28.686	28.7603	24.88	29.6428	23.7721	23.074	21.4381	21.2152	22.567	26.1835	29.1987	28.5024
A0A0H3C1U9	5	4	43.554	0.045477	1.49986	33838.7	RopB OS=Streptococcus pyogenes serotype M49 (strain NZ131) OX=471876 GN=ropB PE=4 SV=1	3.24781	3.63563	2.68153	3.19217	3.76999	2.86283	3.02506	3.11215	2.49259	2.62336	2.73292	2.20777	2.27676	2.94758	2.32487	2.93333	3.55251	2.65704	3.88087	4.17925	3.26261	2.87204	3.6075	2.72453	3.03027	3.61349	2.75776	2.68039	3.15353	2.61893	3.18832	3.275	2.8766	2.52135	2.5164	3.04762	3.77424	3.06802	3.13384	2.81762
A0A0H3BZW9	17	13	152.335	0.00019328	1.21726	63076	Rqc2 homolog RqcH OS=Streptococcus pyogenes serotype M49 (strain NZ131) OX=471876 GN=rqcH PE=3 SV=1	1.60608	1.62152	1.55431	1.81027	1.97149	1.78958	1.64064	1.59023	1.72207	1.52941	1.59424	1.54151	1.55225	1.64706	1.58637	1.48032	1.62223	1.47441	1.71065	1.89786	1.69954	1.62912	1.73621	1.5655	1.69443	1.84585	1.74627	1.74526	1.87958	1.74261	1.59397	1.85711	1.65098	1.55505	1.59523	1.52565	1.76935	1.64361	1.76219	1.78915
A0A0H3BZ98	19	19	173.197	0.00144339	1.3391	78864.1	S1 motif domain-containing protein OS=Streptococcus pyogenes serotype M49 (strain NZ131) OX=471876 GN=Spy49_0490 PE=4 SV=1	5.42976	6.38447	5.15887	5.65556	7.24643	5.67011	5.15601	5.23005	5.17356	4.76781	4.58537	4.85245	5.56917	5.90629	5.39069	6.11578	6.06072	6.13303	4.79616	5.87961	4.47094	5.00377	5.14195	5.36349	5.93638	5.68344	6.02369	6.30316	6.33169	6.38792	5.6577	6.1907	5.18654	4.73521	5.62205	6.10318	5.0489	5.16974	5.88117	6.34092
A0A0H3BW32	9	8	75.1179	5.22893e-06	2.22596	32256.2	S1 RNA binding domain OS=Streptococcus pyogenes serotype M49 (strain NZ131) OX=471876 GN=Spy49_0392 PE=3 SV=1	3.18178	3.56914	2.93847	3.09533	3.37525	2.45175	2.64196	2.74921	2.20661	2.16245	2.15475	1.69225	2.85335	3.00936	2.4175	3.51655	3.81482	3.0818	4.43637	4.95408	3.98633	2.80219	3.20907	2.6875	2.77888	3.01744	2.61497	2.61431	2.66788	2.40028	3.2298	2.97411	2.53259	2.00315	2.76007	3.47105	4.45893	2.89959	2.80376	2.56082
A0A0H3BWC9	2	2	20.8212	6.55032e-15	2.94961	10329.2	S4 RNA-binding domain-containing protein OS=Streptococcus pyogenes serotype M49 (strain NZ131) OX=471876 GN=Spy49_0008 PE=4 SV=1	0.5738	0.610132	0.561103	0.368139	0.359394	0.359755	0.441667	0.418218	0.389413	0.453077	0.460659	0.450373	0.521901	0.535372	0.509639	0.29317	0.311597	0.288218	0.182213	0.204664	0.204739	0.475398	0.512122	0.452393	0.414783	0.446731	0.401634	0.436441	0.447403	0.470691	0.581678	0.362429	0.416433	0.454703	0.522304	0.297662	0.197205	0.479971	0.421049	0.451512
A0A0H3BZJ2	2	2	12.3705	3.83027e-12	1.75164	30222.2	S4 RNA-binding domain-containing protein OS=Streptococcus pyogenes serotype M49 (strain NZ131) OX=471876 GN=Spy49_1169c PE=4 SV=1	0.271715	0.318555	0.300874	0.353516	0.371062	0.347821	0.352401	0.357915	0.328729	0.276679	0.295913	0.297753	0.345628	0.362822	0.356805	0.478039	0.490309	0.461871	0.273326	0.2739	0.269275	0.281241	0.270215	0.294179	0.318841	0.304197	0.318488	0.382073	0.3553	0.34606	0.297048	0.357466	0.346349	0.290115	0.355085	0.476739	0.272167	0.281878	0.313842	0.361144
A0A0H3BZH7	3	3	19.8781	0.721401	1.19888	15345.9	S4 RNA-binding domain-containing protein OS=Streptococcus pyogenes serotype M49 (strain NZ131) OX=471876 GN=Spy49_1809 PE=4 SV=1	0.463701	0.375199	0.473941	0.487398	0.437028	0.516446	0.444285	0.401092	0.454873	0.477549	0.350228	0.504911	0.527315	0.400654	0.503596	0.464193	0.457443	0.482775	0.383703	0.380492	0.437657	0.4751	0.41674	0.506764	0.473659	0.40095	0.497476	0.461329	0.383002	0.490217	0.437614	0.48029	0.433417	0.444229	0.477189	0.468137	0.400617	0.466201	0.457362	0.444849
B5XM14	22	18	251.741	3.16521e-05	1.24632	43174.5	S-adenosylmethionine synthase OS=Streptococcus pyogenes serotype M49 (strain NZ131) OX=471876 GN=metK PE=3 SV=1	8.10251	7.73482	8.20123	7.05171	7.82229	8.13192	6.98279	6.82389	7.62241	7.76734	7.63822	7.74671	7.54533	7.61021	7.77494	7.56615	7.2827	7.49743	8.55177	9.10325	9.05253	8.19229	8.05696	8.03606	7.78136	7.71679	7.67246	7.50376	7.48629	7.66233	8.01285	7.66864	7.14303	7.71742	7.64349	7.44876	8.90252	8.09511	7.72354	7.5508
B5XM46	14	14	145.939	0.847313	1.12997	38367.5	S-adenosylmethionine:tRNA ribosyltransferase-isomerase OS=Streptococcus pyogenes serotype M49 (strain NZ131) OX=471876 GN=queA PE=3 SV=1	3.92216	4.6809	3.72852	3.96491	4.57969	3.67721	3.80384	3.93955	3.59428	3.74801	4.13575	3.53111	3.35224	4.11179	3.44916	3.50982	4.1785	3.68458	4.12192	4.39259	3.73292	3.62594	4.37687	3.46472	3.80225	4.39026	3.58658	3.76433	4.47247	3.80712	4.11053	4.07394	3.77923	3.80496	3.63773	3.79097	4.08248	3.82251	3.92636	4.01464
A0A0H3BZZ5	37	34	443.567	4.48256e-11	1.83519	37419	SclB protein OS=Streptococcus pyogenes serotype M49 (strain NZ131) OX=471876 GN=sclB PE=4 SV=1	11.6166	12.7367	12.3859	9.3978	10.5781	9.96009	8.71032	8.52853	8.04578	7.17926	7.79443	6.27779	12.0052	11.9891	11.9148	10.741	10.775	10.7568	12.5035	13.1626	13.3344	11.2379	11.113	12.2323	10.4245	9.85703	10.0242	10.0848	10.2353	10.1345	12.2464	9.97865	8.42821	7.08383	11.9697	10.7576	13.0001	11.5277	10.1019	10.1515
A0A0H3BXC5	6	6	56.116	7.13531e-08	1.82783	30732.1	Sec-independent protein TatD OS=Streptococcus pyogenes serotype M49 (strain NZ131) OX=471876 GN=Spy49_0219 PE=4 SV=1	1.71749	1.88523	1.95491	2.10525	2.14194	2.44694	1.66841	1.66008	2.02974	1.44241	1.69796	2.03096	1.83641	1.84947	1.98033	2.49771	2.64221	2.81115	3.02838	3.0504	3.37353	1.9226	1.82747	1.98439	1.96318	1.86573	1.89228	1.79177	1.77997	1.92757	1.85254	2.23138	1.78608	1.72378	1.88874	2.65036	3.15077	1.91149	1.90706	1.8331
B5XJX9	5	5	33.0376	3.97687e-07	2.35766	20552.5	Segregation and condensation protein B OS=Streptococcus pyogenes serotype M49 (strain NZ131) OX=471876 GN=scpB PE=3 SV=1	0.406284	0.471024	0.353698	0.25717	0.289558	0.244588	0.373654	0.409288	0.344872	0.440461	0.50712	0.432771	0.397572	0.478204	0.367185	0.629243	0.697254	0.539153	0.324348	0.388994	0.291792	0.306822	0.353523	0.310867	0.259968	0.313738	0.250105	0.287134	0.362358	0.303671	0.410335	0.263772	0.375938	0.460117	0.41432	0.621883	0.335045	0.323737	0.274603	0.317721
A0A0H3C0W3	10	10	89.4404	2.71956e-09	1.63603	38554.7	Sensor histidine kinase OS=Streptococcus pyogenes serotype M49 (strain NZ131) OX=471876 GN=Spy49_1255c PE=4 SV=1	5.94223	6.46033	5.76572	6.06202	6.62936	7.03815	5.10624	5.02385	5.95217	4.0569	4.09441	4.65436	5.47917	5.51776	5.5819	6.70561	6.86961	7.37524	6.65437	7.36319	6.5375	5.7689	5.70887	5.76709	5.67185	5.84507	5.80315	4.43293	4.47589	4.40684	6.05609	6.57651	5.36075	4.26855	5.52628	6.98349	6.85169	5.74829	5.77336	4.43855
B5XKM5	36	34	426.734	0.043793	1.14829	66062.3	Septation ring formation regulator EzrA OS=Streptococcus pyogenes serotype M49 (strain NZ131) OX=471876 GN=ezrA PE=3 SV=1	8.22667	8.74521	8.77932	7.93458	7.92726	8.68856	9.32028	8.71749	9.66719	8.61239	8.40921	8.97821	8.50867	7.95451	8.58064	9.42577	8.52585	9.86	9.59772	8.66895	9.92425	8.54301	7.92308	8.84311	8.41895	8.0365	8.61795	8.53185	7.63579	8.91783	8.58373	8.18347	9.23499	8.6666	8.34794	9.27054	9.39697	8.4364	8.3578	8.36182
B5XLJ2	12	9	96.9152	3.04918e-07	1.41931	45210.5	Serine hydroxymethyltransferase OS=Streptococcus pyogenes serotype M49 (strain NZ131) OX=471876 GN=glyA PE=3 SV=1	1.80611	1.87995	1.79121	2.00387	2.02357	1.9619	2.07738	2.04322	2.04228	1.8557	1.98952	2.01354	1.71964	1.93271	1.66868	2.18884	2.26261	2.26944	2.16876	2.53222	2.28325	1.54456	1.6228	1.75351	1.82617	1.88561	1.97468	1.88224	1.86859	1.86459	1.82575	1.99645	2.05429	1.95292	1.77368	2.2403	2.32807	1.64029	1.89549	1.87181
A0A0H3BVU3	3	3	21.1269	0.570779	1.32618	40007.6	Serine/threonine transporter SstT OS=Streptococcus pyogenes serotype M49 (strain NZ131) OX=471876 GN=sstT PE=3 SV=1	3.34025	3.93466	5.06411	3.51373	4.85362	4.25585	4.10837	4.08196	5.12355	4.6071	4.1813	4.4459	4.78536	4.34513	4.34291	4.85685	3.20497	4.51612	3.97206	4.2649	5.17224	4.05823	3.55823	4.21396	4.50428	3.78208	5.38051	4.78037	4.97586	5.93305	4.11301	4.20773	4.43796	4.41143	4.49113	4.19265	4.46973	3.94347	4.55562	5.22976
B5XHX4	30	25	368.201	0.00169165	1.43666	48295.6	Serine--tRNA ligase OS=Streptococcus pyogenes serotype M49 (strain NZ131) OX=471876 GN=serS PE=3 SV=1	7.6793	8.54534	8.54984	7.69281	8.01691	9.03912	7.54069	6.88986	8.37916	8.51456	8.80686	9.39936	7.98519	7.7069	8.42547	10.0513	8.76867	11.035	10.6917	9.70722	12.371	9.09325	7.91262	9.52476	9.12698	8.22461	9.34178	8.31072	8.05106	8.84111	8.25816	8.24961	7.60324	8.90693	8.03919	9.95164	10.9233	8.84354	8.89779	8.40097
A0A0H3C0H3	3	3	18.7513	2.44249e-15	42.4236	48281.8	Serine-type D-Ala-D-Ala carboxypeptidase OS=Streptococcus pyogenes serotype M49 (strain NZ131) OX=471876 GN=dacA1 PE=3 SV=1	0.0902018	0.101256	0.101813	0.091934	0.0953102	0.0948792	0.088296	0.0861999	0.0764687	0.000559312	0.00427581	0.00376722	0.0879985	0.0832846	0.0817829	0.11495	0.119272	0.13072	0.0277002	0.0267056	0.038614	0.0879043	0.0934876	0.0878553	0.0878487	0.0733026	0.0840187	0.0490628	0.0349456	0.04454	0.097757	0.0940411	0.0836548	0.00286745	0.0843554	0.121647	0.0310066	0.0897491	0.0817233	0.0428495
A0A0H3BX93	12	11	121.177	0	16.3932	33479.5	Shikimate 5-dehydrogenase OS=Streptococcus pyogenes serotype M49 (strain NZ131) OX=471876 GN=aroE.2 PE=4 SV=1	0.474064	0.506852	0.511217	0.609363	0.430709	0.667014	0.542629	0.322371	0.439305	0.413832	0.433051	0.620361	0.550769	0.517749	0.556548	7.22247	6.43349	7.72572	4.41261	4.00819	4.84414	0.705104	0.544836	0.503439	0.663462	0.405903	0.58547	0.646938	0.617799	0.539211	0.497377	0.569029	0.434768	0.489081	0.541688	7.12723	4.42165	0.58446	0.551612	0.601316
B5XMF0	8	7	61.3575	0.128733	1.15822	31276.2	Shikimate dehydrogenase (NADP(+)) OS=Streptococcus pyogenes serotype M49 (strain NZ131) OX=471876 GN=aroE PE=3 SV=1	0.582549	0.615798	0.538143	0.599453	0.664748	0.569415	0.599995	0.571464	0.552065	0.592424	0.646477	0.588121	0.693283	0.658889	0.605692	0.615584	0.626991	0.584466	0.603475	0.630804	0.545236	0.566858	0.56496	0.558592	0.623882	0.590037	0.605828	0.592082	0.584894	0.605097	0.57883	0.611205	0.574508	0.609007	0.652621	0.609014	0.593172	0.56347	0.606582	0.594025
A0A0H3BXJ4	7	7	78.7286	5.58567e-06	1.32479	21254.8	Signal peptidase I OS=Streptococcus pyogenes serotype M49 (strain NZ131) OX=471876 GN=sipC PE=3 SV=1	3.31475	3.42525	3.26627	3.6931	4.14664	3.92849	4.2317	4.83678	4.18769	3.84194	4.07948	3.79846	3.32849	3.55069	3.51114	3.27215	3.59934	3.32527	3.3655	3.68	3.70188	3.43969	3.39064	3.35172	3.52643	3.71802	3.60725	3.41894	3.65248	3.40365	3.33542	3.92274	4.41873	3.90663	3.46344	3.39892	3.58246	3.39402	3.61724	3.49169
A0A0H3C037	16	16	178.407	9.19601e-09	2.47838	22831.2	Signal peptidase I OS=Streptococcus pyogenes serotype M49 (strain NZ131) OX=471876 GN=spi PE=3 SV=1	4.83669	5.07032	4.56457	4.97644	5.70955	4.68621	5.70331	6.25708	4.94021	5.11605	5.61105	4.52291	5.12238	5.61427	4.62902	5.85219	6.38508	5.63384	6.95358	7.83111	6.39876	4.54412	4.74825	4.50248	4.39937	4.8558	4.52226	2.72272	2.99579	2.82879	4.82386	5.12407	5.63353	5.08334	5.12189	5.95704	7.06115	4.59828	4.59248	2.8491
A0A0H3BYE4	47	43	523.495	4.46751e-06	1.47292	57662.1	Signal recognition particle protein OS=Streptococcus pyogenes serotype M49 (strain NZ131) OX=471876 GN=ffh PE=3 SV=1	14.6585	16.4548	13.9598	15.8453	20.1598	18.7317	14.479	15.8833	15.8506	13.5119	14.2286	15.2528	13.6288	13.82	13.8578	12.4055	13.786	12.1743	11.334	13.6831	12.1449	16.0022	15.7482	15.5327	17.2442	18.3727	17.1417	16.6616	16.6585	17.1132	15.0244	18.2456	15.4043	14.3311	13.7689	12.7886	12.3873	15.761	17.5862	16.8111
A0A0H3BXC6	39	34	441.845	0.00294248	1.46461	56783.8	Signal recognition particle receptor FtsY OS=Streptococcus pyogenes serotype M49 (strain NZ131) OX=471876 GN=ftsY PE=3 SV=1	9.27875	9.4386	10.8338	12.4843	12.5127	13.6699	9.81728	9.02582	12.169	9.74897	8.09695	10.4456	9.91712	8.52848	10.7146	9.18786	7.93328	9.27978	10.3177	9.36495	11.4952	11.2295	9.69954	11.9735	12.6765	11.3453	13.1305	12.251	10.7251	12.4612	9.85039	12.889	10.3374	9.43051	9.72008	8.80031	10.3926	10.9675	12.3841	11.8124
A0A0H3BWV1	9	8	79.0697	0.603108	1.38221	57979.2	Signal transduction histidine-protein kinase ArlS OS=Streptococcus pyogenes serotype M49 (strain NZ131) OX=471876 GN=csrS PE=4 SV=1	0.968905	0.781898	1.13385	1.06229	0.783476	1.20979	1.02882	0.745705	1.26722	0.934916	0.779223	1.15901	0.990357	0.779949	1.10111	1.23062	0.914251	1.27154	1.28563	1.01835	1.59995	1.06703	0.853717	1.11492	1.12314	0.827673	1.14248	0.966216	0.809932	1.04826	0.961551	1.01852	1.01392	0.957717	0.957139	1.1388	1.30131	1.01189	1.0311	0.941469
A0A0H3C1V2	12	9	146.544	9.30514e-09	1.53743	18038.8	Single-stranded DNA-binding protein OS=Streptococcus pyogenes serotype M49 (strain NZ131) OX=471876 GN=ssb2 PE=3 SV=1	10.3248	9.84236	10.8833	11.9716	12.1771	13.2975	11.228	11.4942	11.967	9.90573	10.1291	10.5867	10.4073	10.1188	10.8609	10.3513	10.023	11.0751	10.2464	10.6744	12.2864	11.7481	10.6423	11.9593	13.6407	13.4609	13.7502	15.7021	15.653	15.7233	10.3502	12.4821	11.5631	10.2072	10.4623	10.4831	11.0691	11.4499	13.6173	15.6928
A0A0H3BXX4	10	10	76.5735	2.97487e-07	1.38404	82804.8	Single-stranded-DNA-specific exonuclease RecJ OS=Streptococcus pyogenes serotype M49 (strain NZ131) OX=471876 GN=recJ PE=3 SV=1	1.14735	1.19069	1.12454	1.11126	1.14752	1.09076	0.990832	0.973691	1.0441	1.1527	1.06933	1.13149	1.04735	1.05443	1.10049	1.33718	1.45203	1.20097	1.38962	1.48333	1.27425	1.08874	1.09286	1.04696	1.01664	1.06304	0.980133	0.986411	0.987223	1.02282	1.1542	1.11651	1.00287	1.11784	1.06742	1.33006	1.3824	1.07619	1.01994	0.998818
A0A0H3BYV3	16	13	140.899	0.391198	1.27797	59528	Site-specific DNA-methyltransferase (adenine-specific) OS=Streptococcus pyogenes serotype M49 (strain NZ131) OX=471876 GN=hsdM PE=3 SV=1	2.30286	2.66444	2.13202	2.22464	2.59206	1.80138	2.31287	2.45577	1.82117	2.36061	2.5058	1.78096	2.38508	2.55071	1.93434	2.79442	3.01317	2.36578	2.56304	2.85024	2.29512	2.04122	2.42309	1.9313	2.14111	2.42377	2.05364	2.13932	2.32412	2.04978	2.36644	2.20602	2.1966	2.21579	2.29005	2.72446	2.56946	2.13187	2.20617	2.17107
A0A0H3BVQ1	4	4	27.0984	1.77491e-09	2.72355	33009.5	Small ribosomal subunit biogenesis GTPase RsgA OS=Streptococcus pyogenes serotype M49 (strain NZ131) OX=471876 GN=engC PE=3 SV=1	0.221936	0.191005	0.252436	0.295566	0.258083	0.356202	0.242565	0.210153	0.314997	0.228229	0.226038	0.269375	0.34478	0.295576	0.36606	0.596587	0.535735	0.679864	0.516159	0.472964	0.595461	0.248678	0.210803	0.253818	0.267763	0.245087	0.284554	0.219064	0.225284	0.272238	0.221792	0.303284	0.255905	0.241214	0.335472	0.604062	0.528194	0.237766	0.265801	0.238862
A0A0H3BXA8	7	7	74.5602	1.04361e-14	13.4315	27800.3	Sortase OS=Streptococcus pyogenes serotype M49 (strain NZ131) OX=471876 GN=Spy49_0906 PE=4 SV=1	1.8083	1.81433	2.08341	1.94435	1.80737	2.55714	1.98194	1.96739	2.46909	0.374408	0.383876	0.458414	2.4193	2.30979	2.8142	3.8384	3.60575	4.61205	1.20972	1.20784	1.51222	1.8304	1.58547	1.95199	0.823862	0.78148	0.920209	0.302085	0.291974	0.303551	1.90202	2.10295	2.13947	0.405566	2.51443	4.01874	1.30993	1.78929	0.84185	0.299203
A0A0H3BX66	14	10	135.252	0	2.74897	43837.7	Spermidine/putrescine import ATP-binding protein PotA OS=Streptococcus pyogenes serotype M49 (strain NZ131) OX=471876 GN=potA PE=3 SV=1	2.02287	2.15008	2.01951	1.2967	1.37458	1.26722	1.84497	1.83244	1.60985	2.02939	2.00466	1.95511	1.98061	1.97357	1.937	3.18773	3.19855	3.1136	3.4534	3.38318	3.47258	1.78019	1.6843	1.64855	1.28457	1.30542	1.28044	1.22984	1.27576	1.24459	2.06415	1.31284	1.76242	1.99639	1.96373	3.16663	3.43639	1.70435	1.29014	1.25007
A0A0H3C049	6	6	76.2928	0	32.8664	11567.9	Spi SpeB protease inhibitor OS=Streptococcus pyogenes serotype M49 (strain NZ131) OX=471876 GN=Spy49_1689c PE=4 SV=1	0.513866	0.589825	0.64987	0.686799	0.661797	0.763676	0.363041	0.428504	0.462955	12.1482	12.0743	12.4339	0.574148	0.670289	0.70757	0.359216	0.356064	0.400036	0.359995	0.360834	0.414918	0.7222	0.616183	0.840603	0.669888	0.706019	0.683753	0.788141	0.728499	0.738593	0.58452	0.704091	0.418167	12.2188	0.650669	0.371772	0.378582	0.726328	0.686553	0.751744
B5XMJ4	8	7	74.385	0.000182168	2.01925	18149.6	S-ribosylhomocysteine lyase OS=Streptococcus pyogenes serotype M49 (strain NZ131) OX=471876 GN=luxS PE=3 SV=1	5.95685	6.39287	5.10373	5.8569	6.68271	4.92353	5.97461	6.85188	5.03158	5.8628	6.63584	4.68008	5.72345	6.69292	5.12097	5.46252	6.35814	5.03873	3.32554	3.17913	3.26203	5.28583	6.17686	5.03768	5.47303	5.98346	5.22241	6.39764	7.38039	5.94338	5.81782	5.82104	5.95269	5.72624	5.84578	5.6198	3.25557	5.50012	5.55963	6.5738
A0A0H3BYX9	8	8	62.903	5.95413e-13	2.21828	28480	SseB domain-containing protein OS=Streptococcus pyogenes serotype M49 (strain NZ131) OX=471876 GN=Spy49_1607c PE=4 SV=1	2.05547	2.13609	2.15356	1.78162	1.971	1.93079	2.01551	1.78575	2.12577	1.82773	1.91107	1.95782	2.33828	2.21714	2.42912	3.51897	3.46465	3.96976	2.98307	3.34368	3.26738	2.00531	1.7881	1.96304	1.6135	1.7287	1.59559	1.75996	1.65701	1.80668	2.11504	1.89447	1.97568	1.89888	2.32818	3.65113	3.19804	1.91882	1.64593	1.74122
B5XK94	3	3	24.9089	3.20821e-10	1.75147	17729.6	SsrA-binding protein OS=Streptococcus pyogenes serotype M49 (strain NZ131) OX=471876 GN=smpB PE=3 SV=1	1.01495	1.09027	1.00627	0.988599	1.0355	0.931686	0.881228	0.886988	0.851763	0.870243	0.806579	0.757738	0.98506	0.889964	0.806161	1.17833	1.1718	1.1996	1.42401	1.4056	1.43445	1.00694	0.97927	0.996509	1.02151	1.03185	0.991906	1.02215	0.926893	0.881843	1.03716	0.98526	0.873327	0.81152	0.893729	1.18324	1.42135	0.994241	1.01509	0.94363
A0A0H3BZQ5	31	28	475.833	1.43913e-06	1.56399	43863.5	SSU ribosomal protein S1p OS=Streptococcus pyogenes serotype M49 (strain NZ131) OX=471876 GN=rpsA PE=4 SV=1	56.4302	56.3523	60.5372	54.0597	50.6165	58.4367	48.591	46.6361	54.3242	44.2681	42.85	49.0103	56.6864	53.2053	57.6083	69.6631	61.274	73.5478	72.162	65.4008	75.3409	59.7775	54.4346	60.7681	52.6684	48.7351	55.3113	50.5113	47.4287	52.567	57.7732	54.371	49.8504	45.3762	55.8333	68.1616	70.9679	58.3267	52.2383	50.169
A0A0H3C1N8	8	8	94.6959	0	8.54278	50084.3	Streptokinase OS=Streptococcus pyogenes serotype M49 (strain NZ131) OX=471876 GN=ska PE=4 SV=1	0.600311	0.620793	0.62245	0.746411	0.80287	0.823794	0.642946	0.595364	0.72758	0.578795	0.51438	0.554003	1.3157	1.40395	1.46764	1.96458	1.9641	2.19415	3.89596	3.72446	4.17143	0.678203	0.650909	0.699363	0.511436	0.473587	0.478859	0.469078	0.468637	0.442615	0.614518	0.791025	0.655297	0.54906	1.39576	2.04094	3.93061	0.676158	0.48796	0.46011
A0A0H3BZW0	5	5	40.5074	1.72085e-14	7.71613	36313.8	Streptolysin S biosynthesis protein B (SagB) OS=Streptococcus pyogenes serotype M49 (strain NZ131) OX=471876 GN=sagB PE=4 SV=1	0.417405	0.466789	0.587753	0.175627	0.159939	0.208705	0.550866	0.421786	0.534437	1.51097	1.31962	1.36907	0.690911	0.627031	0.698498	0.349354	0.288742	0.363416	0.384661	0.33378	0.442368	0.639918	0.537539	0.679711	0.235407	0.207607	0.262397	0.293352	0.267984	0.283122	0.490649	0.181423	0.502363	1.39989	0.672147	0.333837	0.386936	0.619056	0.235137	0.281486
A0A0H3BWK3	10	9	91.9402	0	6.33328	40551.4	Streptolysin S biosynthesis protein C (SagC) OS=Streptococcus pyogenes serotype M49 (strain NZ131) OX=471876 GN=sagC PE=4 SV=1	3.23951	3.29378	3.15925	0.892789	0.873738	0.963331	2.21989	2.04075	2.38954	5.57455	5.68557	6.02884	3.03572	2.87382	2.87707	1.40489	1.44383	1.48092	2.10585	2.2929	2.15452	3.05641	2.95826	2.99606	1.0083	0.988089	0.973774	1.20354	1.1676	1.23005	3.23085	0.909953	2.21673	5.76299	2.92887	1.44321	2.18443	3.00357	0.990056	1.2004
A0A0H3BXM7	11	9	99.0199	4.66294e-15	9.32673	52131.9	Streptolysin S biosynthesis protein D (SagD) OS=Streptococcus pyogenes serotype M49 (strain NZ131) OX=471876 GN=sagD PE=4 SV=1	1.27632	1.18801	1.4739	0.355614	0.3185	0.438947	0.862415	0.867652	1.05648	3.43021	3.19586	3.75516	1.30939	1.22253	1.58683	0.695862	0.633689	0.805741	0.794264	0.696278	0.996981	1.37963	1.21782	1.32213	0.445544	0.437504	0.460072	0.644918	0.638901	0.685721	1.31274	0.37102	0.928848	3.46041	1.37292	0.711764	0.829174	1.30652	0.447707	0.656513
A0A0H3BZW4	10	9	112.405	4.88498e-14	3.06528	34344.6	Streptolysin S export ATP-binding protein (SagG) OS=Streptococcus pyogenes serotype M49 (strain NZ131) OX=471876 GN=sagG PE=4 SV=1	2.11326	2.36726	2.18969	1.45506	1.73124	1.45687	1.97799	1.95767	1.86269	4.81567	5.08823	4.3287	2.44629	2.72961	2.41422	2.01983	1.99111	2.0259	2.49225	2.60288	2.79217	2.24854	2.25495	2.23473	1.65997	1.70119	1.57854	1.89884	2.11106	1.83088	2.2234	1.54772	1.93278	4.7442	2.53004	2.01228	2.6291	2.24607	1.64657	1.94693
A0A0H3BWK7	5	4	40.2907	4.04121e-14	2.93752	42172.9	Streptolysin S export transmembrane protein (SagH) OS=Streptococcus pyogenes serotype M49 (strain NZ131) OX=471876 GN=sagH PE=4 SV=1	0.538792	0.620493	0.541154	0.313177	0.37673	0.349433	0.419082	0.431413	0.417477	0.984942	1.05561	1.01253	0.568884	0.630491	0.579915	0.521774	0.569469	0.485354	0.40673	0.501519	0.409912	0.523369	0.507094	0.530185	0.353666	0.357186	0.376944	0.422363	0.469555	0.437744	0.566813	0.346447	0.422657	1.01769	0.593097	0.525532	0.439387	0.520216	0.362599	0.443221
A0A0H3BXN2	3	3	30.3609	0	4.71016	41896.5	Streptolysin S export transmembrane protein (SagI) OS=Streptococcus pyogenes serotype M49 (strain NZ131) OX=471876 GN=sagI PE=4 SV=1	0.589423	0.700755	0.644401	0.251712	0.27339	0.331782	0.476483	0.51213	0.528133	1.22546	1.32291	1.40961	0.648118	0.71249	0.676367	0.555057	0.521548	0.578278	0.594299	0.663397	0.619117	0.618446	0.588768	0.612371	0.275971	0.285484	0.278851	0.293385	0.295267	0.305312	0.64486	0.285628	0.505582	1.31933	0.678992	0.551628	0.625604	0.606528	0.280102	0.297988
A0A0H3BYV5	6	6	46.7859	8.10796e-13	1.97995	21600.9	Sua5/YciO/YrdC family protein OS=Streptococcus pyogenes serotype M49 (strain NZ131) OX=471876 GN=Spy49_0896 PE=4 SV=1	0.649112	0.633716	0.694657	0.785478	0.745288	0.770233	0.765746	0.712579	0.71145	0.601906	0.520002	0.614552	0.671707	0.65396	0.736694	1.11492	1.02173	1.15469	1.15385	1.01992	1.10752	0.687694	0.648384	0.652514	0.632215	0.620445	0.611641	0.527793	0.544561	0.589979	0.659162	0.767	0.729925	0.57882	0.687454	1.09711	1.09376	0.662864	0.621433	0.554111
A0A0H3C005	13	10	158.182	7.39409e-14	3.62679	52034.8	Succinate-semialdehyde dehydrogenase NADP OS=Streptococcus pyogenes serotype M49 (strain NZ131) OX=471876 GN=Spy49_0841 PE=4 SV=1	2.34207	2.59939	2.23769	2.01764	2.22974	1.88073	3.42966	3.53648	3.1484	7.07239	7.89053	6.79327	3.06441	3.17156	2.82342	1.99126	2.12101	1.88648	2.34404	2.55094	2.2271	2.95268	3.32558	2.79563	2.54861	2.81785	2.38017	3.01844	3.13866	2.8835	2.39305	2.0427	3.37151	7.25206	3.0198	1.99958	2.37403	3.02463	2.58221	3.01354
A0A0H3BZZ2	29	24	322.921	7.77156e-16	2.59032	42091.2	Sugar ABC transporter_ ATP-binding protein OS=Streptococcus pyogenes serotype M49 (strain NZ131) OX=471876 GN=msmK PE=4 SV=1	10.1238	11.5779	10.1774	5.05996	5.52509	5.24676	10.3834	11.2783	10.3018	12.9915	14.2629	13.755	9.88133	10.3433	9.81899	7.41278	7.95362	7.65928	9.51249	10.7327	10.0488	9.08685	8.68492	9.00269	5.94433	6.15611	5.94748	6.93718	7.09408	7.09819	10.6264	5.27727	10.6545	13.6698	10.0145	7.67523	10.098	8.92482	6.01598	7.04315
A0A0H3BVP3	35	28	367.517	0	5.86173	48602.2	Sugar ABC transporter_ sugar-binding protein OS=Streptococcus pyogenes serotype M49 (strain NZ131) OX=471876 GN=Spy49_0212 PE=4 SV=1	5.67444	5.93345	5.79922	1.85711	1.93029	2.27084	6.40379	6.36072	6.80713	11.6459	11.5869	12.2789	6.40421	6.32846	6.91652	4.10853	4.2124	3.99144	2.02704	2.12822	2.04784	5.40648	5.54352	5.78234	2.3636	2.11145	2.29163	2.14997	2.11464	2.14913	5.80237	2.01941	6.52388	11.8373	6.54973	4.10412	2.0677	5.57745	2.25556	2.13791
A0A0H3BY89	15	12	134.778	0	3.85292	93251.1	Sulfatase domain-containing protein OS=Streptococcus pyogenes serotype M49 (strain NZ131) OX=471876 GN=Spy49_0619 PE=4 SV=1	1.11255	1.07368	1.11577	0.799795	0.945632	0.850497	1.16207	1.17316	1.19763	1.03656	1.1172	1.06676	1.17681	1.12074	1.2192	2.22587	2.13913	2.24212	0.546865	0.564007	0.603961	0.947808	0.907971	1.00028	0.716928	0.7411	0.778366	0.717932	0.741808	0.765055	1.10066	0.865308	1.17762	1.07351	1.17225	2.20237	0.571611	0.952019	0.745464	0.741598
A0A0H3BYY9	11	11	187.337	6.52627e-11	2.35096	24220.3	Superoxide dismutase OS=Streptococcus pyogenes serotype M49 (strain NZ131) OX=471876 GN=sodM PE=3 SV=1	9.29659	9.67226	9.96084	20.074	21.8454	21.7511	15.9688	17.7073	16.8126	18.0249	17.9008	18.6738	23.2401	20.6174	23.6909	9.48691	9.55851	11.3689	9.55129	8.96546	13.3359	16.9492	15.1014	18.1219	16.1536	16.9313	17.9675	22.4185	21.9278	23.6661	9.64323	21.2235	16.8295	18.1998	22.5162	10.1381	10.6175	16.7242	17.0175	22.6708
A0A0H3BZX4	5	4	53.698	0.0252329	1.26758	17042.4	t(6)A37 threonylcarbamoyladenosine biosynthesis protein TsaE OS=Streptococcus pyogenes serotype M49 (strain NZ131) OX=471876 GN=Spy49_1350c PE=3 SV=1	1.1015	1.13545	1.08364	1.18241	1.18098	1.18764	0.979926	1.08651	1.34452	1.18624	1.16551	1.35888	1.17665	1.16429	1.22082	1.38683	1.24281	1.32206	1.2168	1.18478	1.16245	1.27728	0.996976	1.29006	1.06475	1.15495	1.13868	1.41123	1.38202	1.41585	1.10686	1.18368	1.13699	1.23688	1.18725	1.31723	1.18801	1.18811	1.11946	1.40303
A0A0H3C1N0	17	14	193.325	1.49325e-13	4.54107	36237.9	Tagatose 1_6-diphosphate aldolase OS=Streptococcus pyogenes serotype M49 (strain NZ131) OX=471876 GN=lacD1 PE=3 SV=1	13.3344	16.4002	12.4193	3.04208	3.63007	2.61066	11.2584	11.046	8.99874	14.6695	15.2838	11.6512	12.3915	12.9375	10.4905	7.90311	7.90913	6.49371	10.6699	11.6292	9.70074	9.75902	10.4557	9.01809	3.71504	3.72961	3.57781	4.25101	4.22082	3.99551	14.0513	3.09427	10.4343	13.8682	11.9399	7.43532	10.6666	9.74427	3.67415	4.15578
A0A0H3C0F2	38	28	501.596	0	5.68566	36765.6	Tagatose 1_6-diphosphate aldolase OS=Streptococcus pyogenes serotype M49 (strain NZ131) OX=471876 GN=lacD2 PE=3 SV=1	39.8269	44.2939	40.3347	6.93973	7.87689	7.07272	29.5974	33.3289	29.1921	36.1073	37.1428	36.5058	36.2496	37.1872	36.1813	22.0486	22.8342	21.911	26.6056	29.701	28.239	30.365	30.9965	29.9284	8.1212	8.40451	8.63109	11.1547	10.765	10.976	41.4852	7.29645	30.7062	36.5853	36.5394	22.2646	28.1819	30.43	8.3856	10.9652
A0A0H3BYB9	23	20	309.324	2.16493e-14	2.29011	32834.3	Tagatose-6-phosphate kinase OS=Streptococcus pyogenes serotype M49 (strain NZ131) OX=471876 GN=fruK PE=3 SV=1	13.5856	15.1273	14.3029	9.18519	10.6147	8.82017	10.6162	11.4076	10.2229	8.82845	8.71416	8.69856	13.9762	15.0608	13.8919	17.1129	17.8654	17.7175	18.9665	21.293	19.8357	11.2425	11.3133	10.9332	9.9373	10.2966	9.61107	10.7977	11.4787	11.0553	14.3386	9.54001	10.7489	8.74705	14.3097	17.5653	20.0318	11.163	9.94832	11.1106
B5XII4	19	13	218.343	0	9.65944	33642.3	Tagatose-6-phosphate kinase OS=Streptococcus pyogenes serotype M49 (strain NZ131) OX=471876 GN=lacC PE=3 SV=1	11.7196	12.7895	10.3518	1.12749	1.31417	1.16735	7.60876	7.76095	7.91167	8.8002	9.71788	9.52912	10.1028	10.5875	10.3558	5.57378	6.05139	5.41337	4.77887	5.9654	4.4173	6.98911	7.54689	7.18122	1.32569	1.28503	1.31903	1.91325	1.83145	1.86757	11.6203	1.203	7.76046	9.34907	10.3487	5.67952	5.05386	7.23907	1.30992	1.87076
A0A0H3BZZ3	15	13	123.799	2.46566e-09	1.48628	45813.9	Teichoic acid export ATP-binding protein tagH OS=Streptococcus pyogenes serotype M49 (strain NZ131) OX=471876 GN=rgpDc PE=4 SV=1	2.57342	2.59562	2.54987	2.12985	2.3961	2.13103	2.60294	2.50799	2.69643	2.75497	2.74748	2.73395	2.59856	2.46308	2.54281	3.04291	2.85162	3.14362	3.02746	3.20739	3.26348	2.26391	2.19109	2.40464	2.05532	2.11604	2.21929	2.51543	2.28665	2.55293	2.57297	2.21899	2.60245	2.74547	2.53482	3.01272	3.16611	2.28655	2.13022	2.45167
A0A0H3BYW1	4	4	26.3854	8.56497e-11	3.12538	63727.8	Thiol-activated cytolysin OS=Streptococcus pyogenes serotype M49 (strain NZ131) OX=471876 GN=slo PE=3 SV=1	0.405165	0.397127	0.470659	0.497861	0.452668	0.588049	0.251021	0.223163	0.263442	0.158081	0.156758	0.177446	0.239556	0.233786	0.275756	0.20127	0.198453	0.209874	0.272239	0.249925	0.280712	0.325404	0.331768	0.371068	0.287615	0.296402	0.314701	0.278047	0.270272	0.245594	0.424317	0.512859	0.245875	0.164095	0.249699	0.203199	0.267625	0.342747	0.299573	0.264638
A0A0H3C168	10	9	124.913	8.45854e-07	1.5182	11824.6	Thioredoxin OS=Streptococcus pyogenes serotype M49 (strain NZ131) OX=471876 GN=trx2 PE=3 SV=1	35.1342	39.1761	35.9286	51.4718	59.19	49.564	40.3392	45.6288	38.2494	34.5645	37.974	32.9985	42.4028	46.4638	40.4973	36.504	40.4396	34.9115	35.5514	40.0516	35.8117	44.8172	45.2878	43.9672	49.2777	51.9386	48.6685	44.5903	46.5613	44.6358	36.7463	53.4086	41.4058	35.179	43.1213	37.285	37.1383	44.6907	49.9616	45.2625
A0A0H3C1K3	17	14	187.443	0.000112418	1.22277	33714.1	Thioredoxin reductase OS=Streptococcus pyogenes serotype M49 (strain NZ131) OX=471876 GN=nox2 PE=3 SV=1	4.79912	4.69493	4.91714	4.91906	5.56037	5.01295	4.48599	4.52278	4.48161	4.7639	4.78147	5.39904	4.78722	4.7858	4.52108	4.22259	4.16052	4.3747	5.25331	5.04267	5.30394	5.04085	4.566	4.65101	4.93242	5.04953	4.94844	4.68217	4.7245	4.72336	4.80373	5.16413	4.49679	4.98147	4.69803	4.2526	5.19997	4.75262	4.9768	4.71001
B5XKA6	36	32	450.026	0.000402024	1.45534	74444	Threonine--tRNA ligase OS=Streptococcus pyogenes serotype M49 (strain NZ131) OX=471876 GN=thrS PE=3 SV=1	10.7025	10.9383	11.6681	10.6133	10.7555	11.711	9.95368	8.59346	10.6724	7.85222	7.99288	9.56086	9.57385	8.98053	10.7068	11.3014	10.0322	12.2036	12.2151	10.5704	13.0562	11.3635	10.7271	12.0875	12.7164	11.7004	12.5577	11.7808	10.9858	11.906	11.103	11.0266	9.73983	8.46866	9.75372	11.1791	11.9472	11.3927	12.3248	11.5575
A0A0H3C0X7	14	10	137.362	1.76318e-08	1.63272	43428.9	THUMP domain-containing protein OS=Streptococcus pyogenes serotype M49 (strain NZ131) OX=471876 GN=Spy49_1275c PE=4 SV=1	2.51963	2.91343	2.61258	4.07448	4.72795	3.89259	3.36618	3.46039	3.12015	3.36163	3.24732	3.19656	2.71992	2.87379	2.67692	2.60257	2.69392	2.47886	2.56964	2.90539	2.5723	2.79968	3.00581	2.70762	3.12267	3.29188	3.20092	3.37449	3.34583	3.39187	2.68188	4.23167	3.31557	3.2685	2.75687	2.59178	2.68245	2.8377	3.20516	3.37073
[truncated: 268 more rows]

## Sheet: Exp 2
								Amount (fmol) on column																										Mean values
								THY 0.8		THY ME		THY exp		THY stat		THY late stat		CDMF ME		CDMF exp		CDMF stat		CDMF late stat		CDM- ME		CDM- exp		CDM- stat		CDM- late stat
[truncated: 1,036 more rows]

## Sheet: Exp 3
								Amount (fmol) on column																		Mean values
[truncated: 993 more rows]
