# Supplementary material for: Dynamic Protein Phosphorylation in Streptococcus pyogenes during Growth, Stationary Phase, and Starvation
Source: Microorganisms. 2024 Mar 20;12(3):621. doi: 10.3390/microorganisms12030621 (PMC10975399; doi:10.3390/microorganisms12030621)
Supplement: Supplementary file 1 [file microorganisms-12-00621-s001.zip › Supplementary Table S2.xlsx]

## Sheet: Exp 1 HDMSE
										Mascot										Ion accounting								Spectral library							Peptide raw abundance
																																			THY 0.8			THY ME			THY exp			THY stat			CDMF ME
Feature	m/z	Charge	Mass	Retention time (min)	Retention time window (min)	Drift time (ms)	UniProt Acc. No.	Protein name	Peptide sequence	Peptide sequence	Modifications [position]	Peptide score	Mass error (ppm)	Spectral counts	Max local probab	Mean local probab	15 AS window	Residue	Position	Peptide sequence	Modifications [position]	Peptide score	Mass error (ppm)	Spectral counts	15 AS window	Residue	Position	Peptide sequence	Modifications [position]	Peptide score	Mass error (ppm)	15 AS window	Residue	Position	21042021_Spy_Phos_1_THY08_HDMSe_01	21042021_Spy_Phos_1_THY08_HDMSe_02	21042021_Spy_Phos_1_THY08_HDMSe_03	21042021_Spy_Phos_2_THY15_HDMSe_02	21042021_Spy_Phos_2_THY15_HDMSe_03	21042021_Spy_Phos_2_THY15_HDMSe_04	21042021_Spy_Phos_3_THYexpo_HDMSe_01	21042021_Spy_Phos_3_THYexpo_HDMSe_02	21042021_Spy_Phos_3_THYexpo_HDMSe_03	21042021_Spy_Phos_4_THYstat_HDMSe_01	21042021_Spy_Phos_4_THYstat_HDMSe_02	21042021_Spy_Phos_4_THYstat_HDMSe_03	21042021_Spy_Phos_5_Fru15_HDMSe_01	21042021_Spy_Phos_5_Fru15_HDMSe_02	21042021_Spy_Phos_5_Fru15_HDMSe_03
3	875.411	2	1748.81	43.631	4.60358	4.84765	A0A0H3BY55	Non-specific serine/threonine protein kinase OS=Streptococcus pyogenes serotype M49 (strain NZ131) OX=471876 GN=Spy49_1257c PE=4 SV=1	LDQTNQTDALQPPTK	LDQTNQTDALQPPTK	[4] Phospho (STY)	109.58	5.21734	37	100	99.3878	QESRLDQTNQTDALQ	T	324	LDQTNQTDALQPPTK	[4] Phospho (STY)	7.3039	5.20389	14	QESRLDQTNQTDALQ	T	324	LDQTNQTDALQPPTK	[4] Phospho (STY)	82.782	5.23415	QESRLDQTNQTDALQ	T	324	887490	1.24766e+06	1.11384e+06	563744	537933	417030	804031	1.05872e+06	918059	498311	700232	574244	942820	990158	892804
18	803.401	2	1604.79	56.0969	1.57538	4.01662	A0A0H3BY55	Non-specific serine/threonine protein kinase OS=Streptococcus pyogenes serotype M49 (strain NZ131) OX=471876 GN=Spy49_1257c PE=4 SV=1	LSPPTPTVLTQESR	LSPPTPTVLTQESR	[10] Phospho (STY)	93.27	4.41555	26	99.97	92.8658	PPTPTVLTQESRLDQ	T	316	LSPPTPTVLTQESR	[10] Phospho (STY)	6.7864	4.4632	17	PPTPTVLTQESRLDQ	T	316								230885	334782	294836	132960	128877	121245	205110	282393	252024	93041.8	136022	133116	240934	303251	275438
20	565.963	3	1694.87	60.0117	1.19343	3.04709	A0A0H3BY55	Non-specific serine/threonine protein kinase OS=Streptococcus pyogenes serotype M49 (strain NZ131) OX=471876 GN=Spy49_1257c PE=4 SV=1	IIFEDVESTKPLPK	IIFEDVESTKPLPK	[9] Phospho (STY)	72.43	7.79385	29	93.01	69.1022	IFEDVESTKPLPKVA	T	291	IIFEDVESTKPLPK	[9] Phospho (STY)	6.8843	7.77997	11	IFEDVESTKPLPKVA	T	291								125775	184021	162446	62287.1	61257.5	67787.7	105288	139800	141267	43302.5	59759.3	70281.6	107909	143132	145156
21	828.396	3	2482.16	49.9674	1.07055	3.53186	A0A0H3BZD6	Putative PTS system enzyme II OS=Streptococcus pyogenes serotype M49 (strain NZ131) OX=471876 GN=Spy49_1737c PE=4 SV=1	TEDEAKLPETPVSDAPVATAPHK	TEDEAKLPETPVSDAPVATAPHK	[13] Phospho (STY)	148.5	0.759616	33	99.99	94.9317	KLPETPVSDAPVATA	S	507	TEDEAKLPETPVSDAPVATAPHK	[13] Phospho (STY)	6.1157	0.750135	4	KLPETPVSDAPVATA	S	507	TEDEAKLPETPVSDAPVATAPHK	[10] Phospho (STY)	60.5451	0.731173	DEAKLPETPVSDAPV	T	504	34599	50446.2	45660.3	25435.5	20699.6	19282.1	28320	38481	35781.3	134778	180415	165013	41434.8	42909.9	40909.2
23	583.945	3	1748.81	43.6646	4.46023	2.83934	A0A0H3BY55	Non-specific serine/threonine protein kinase OS=Streptococcus pyogenes serotype M49 (strain NZ131) OX=471876 GN=Spy49_1257c PE=4 SV=1	LDQTNQTDALQPPTK	LDQTNQTDALQPPTK	[4] Phospho (STY)	105.07	8.88876	34	100	94.805	QESRLDQTNQTDALQ	T	324	LDQTNQTDALQPPTK	[4] Phospho (STY)	7.3039	8.8753	14	QESRLDQTNQTDALQ	T	324	LDQTNQTDALQPPTK	[4] Phospho (STY)	91.9745	8.90557	QESRLDQTNQTDALQ	T	324	343957	440701	439550	168949	166838	244122	327634	381236	431674	177507	226606	304672	333415	455121	517013
25	626.644	3	1876.91	38.9869	3.83298	2.97784	A0A0H3BY55	Non-specific serine/threonine protein kinase OS=Streptococcus pyogenes serotype M49 (strain NZ131) OX=471876 GN=Spy49_1257c PE=4 SV=1	LDQTNQTDALQPPTKK	LDQTNQTDALQPPTKK	[4] Phospho (STY)	98.11	8.37928	33	99.99	96.5886	QESRLDQTNQTDALQ	T	324	LDQTNQTDALQPPTKK	[4] Phospho (STY)	7.1778	8.42002	13	QESRLDQTNQTDALQ	T	324	LDQTNQTDALQPPTKK	[7] Phospho (STY)	78.9246	8.44822	RLDQTNQTDALQPPT	T	327	336728	473460	449568	171497	161127	162880	322885	408040	390874	161815	226042	218645	396300	472249	442577
26	608.659	3	1822.96	55.7561	0.84535	3.1856	A0A0H3BY55	Non-specific serine/threonine protein kinase OS=Streptococcus pyogenes serotype M49 (strain NZ131) OX=471876 GN=Spy49_1257c PE=4 SV=1	KIIFEDVESTKPLPK	KIIFEDVESTKPLPK	[10] Phospho (STY)	81.93	4.52743	30	86.05	64.2166	IFEDVESTKPLPKVA	T	291	KIIFEDVESTKPLPK	[9] Phospho (STY)	7.009	4.51452	17	IIFEDVESTKPLPKV	S	290								98066.2	135603	126544	42000.9	42580.8	42703.3	84322.1	112340	101666	34780.9	50275	49942	88555.3	109091	99750
27	711.348	2	1420.68	39.9143	0.927217	3.67036	A0A0H3BYM9	Glyceraldehyde-3-phosphate dehydrogenase OS=Streptococcus pyogenes serotype M49 (strain NZ131) OX=471876 GN=plr PE=3 SV=1	AGAANIVPNSTGAAK	AGAANIVPNSTGAAK	[11] Phospho (STY)	50.56	6.8922	23	79.55	56.345	ANIVPNSTGAAKAIG	T	212	AGAANIVPNSTGAAK	[10] Phospho (STY)	8.3034	6.87564	15	AANIVPNSTGAAKAI	S	211	AGAANIVPNSTGAAK	[11] Phospho (STY)	87.439	6.92946	ANIVPNSTGAAKAIG	T	212	49142.4	81461.4	70237.5	102207	97468.6	93213.3	44041.9	64068.8	62151.4	37332.8	54248.3	51581.2	79513.5	103030	97793.6
43	502.714	2	1003.41	37.9979	1.08403	2.56233	B5XJ02	UPF0297 protein Spy49_1751c OS=Streptococcus pyogenes serotype M49 (strain NZ131) OX=471876 GN=Spy49_1751c PE=3 SV=1	GFTDETVR	GFTDETVR	[6] Phospho (STY)	42.38	12.7111	19	99.86	97.964	-MGFTDETVRFKLDD	T	7					0				GFTDETVR	[6] Phospho (STY)	94.0883	12.6642	-MGFTDETVRFKLDD	T	7	59350.3	85747.7	76185.7	103418	99451.3	97565.1	63762.4	81921	82896.2	18357.8	26863.4	26422.1	38614.5	46516.7	46568.2
44	828.394	3	2482.16	47.8052	0.62765	4.15512	A0A0H3BZD6	Putative PTS system enzyme II OS=Streptococcus pyogenes serotype M49 (strain NZ131) OX=471876 GN=Spy49_1737c PE=4 SV=1	TEDEAKLPETPVSDAPVATAPHK	TEDEAKLPETPVSDAPVATAPHK	[10] Phospho (STY)	127.68	-1.11846	26	99.98	88.2833	DEAKLPETPVSDAPV	T	504	TEDEAKLPETPVSDAPVATAPHK	[10] Phospho (STY)	5.9188	-1.12794	4	DEAKLPETPVSDAPV	T	504	TEDEAKLPETPVSDAPVATAPHK	[10] Phospho (STY)	71.0558	-1.1469	DEAKLPETPVSDAPV	T	504	11958.3	20098.2	14829.3	10164	8706.7	6949.95	10000.4	14930.7	13210.2	61356.6	90279.9	77747.6	15563.6	17605.4	16007.7
52	627.782	2	1253.55	28.367	0.906983	3.11634	A0A0H3BZL9	PTS system_ fructose-specific IIABC component OS=Streptococcus pyogenes serotype M49 (strain NZ131) OX=471876 GN=fruA PE=4 SV=1	VETNGASGVANR	VETNGASGVANR	[7] Phospho (STY)	95.44	7.31997	37	100	96.6068	KVETNGASGVANRLT	S	205	VETNGASGVANR	[7] Phospho (STY)	7.361	7.3012	21	KVETNGASGVANRLT	S	205	VETNGASGVANR	[7] Phospho (STY)	85.7017	7.3622	KVETNGASGVANRLT	S	205	21368.1	38122	33843.5	20421.4	19247.9	17847.4	16144.1	25711.6	25807.5	66846.6	102278	105502	27093.7	37013.9	34201.2
57	678.324	3	2031.95	58.1161	0.907217	2.97784	A0A0H3BYP4	Phosphoglucosamine mutase OS=Streptococcus pyogenes serotype M49 (strain NZ131) OX=471876 GN=glmM PE=3 SV=1	ASAGVMISASHNPALDNGIK	ASAGVMISASHNPALDNGIK	[10] Phospho (STY)	102.36	3.2425	28	99.76	76.9907	AGVMISASHNPALDN	S	100	ASAGVMISASHNPALDNGIK	[10] Phospho (STY)	6.8357	3.28013	11	AGVMISASHNPALDN	S	100								31721.9	7912.58	31365.8	9540.07	8480.96	7976.98	44069.3	54992.9	51203.3	55112.5	81042.5	81553.1	46251.5	62564.7	59254.4
59	610.317	2	1218.62	35.6175	0.94815	3.3241	B5XKI1	Elongation factor Tu OS=Streptococcus pyogenes serotype M49 (strain NZ131) OX=471876 GN=tuf PE=3 SV=1	RLPTSVNQPK	RLPTSVNQPK	[5] Phospho (STY)	45.81	6.32681	16	95.21	76.5706	LARRLPTSVNQPKDY	S	43	RLPTSVNQPK	[5] Phospho (STY)	7.9921	6.38956	4	LARRLPTSVNQPKDY	S	43	RLPTSVNQPK	[5] Phospho (STY)	75.4856	6.28819	LARRLPTSVNQPKDY	S	43	10796.1	18278.7	16040.2	12170	11251.3	9142.36	9102.41	15134	13278.4	53724.4	79867.6	69313.6	12120.4	15872.5	14069.1
61	698.309	2	1394.6	49.4219	1.95723	3.73961	A0A0H3BZP2	Arsenate reductase OS=Streptococcus pyogenes serotype M49 (strain NZ131) OX=471876 GN=arsC PE=3 SV=1	EDGESVNPIEVK	EDGESVNPIEVK	[5] Phospho (STY)	93.79	5.24524	33	100	100	YMKEDGESVNPIEVK	S	131					0				EDGESVNPIEVK	[5] Phospho (STY)	85.0981	5.21149	YMKEDGESVNPIEVK	S	131	10512.9	17841.8	14756.1	16312.3	15029.5	16352.7	10681.2	16077.9	13882.8	11491.5	17569.5	16559	32472.6	38785.7	38615.5
77	874.44	3	2620.3	60.2984	0.566	4.22438	A0A0H3BXH0	Endolytic murein transglycosylase OS=Streptococcus pyogenes serotype M49 (strain NZ131) OX=471876 GN=mltG PE=3 SV=1	VVQANELQETASKESQVPLTIEK	VVQANELQETASKESQVPLTIEK	[12] Phospho (STY)	126.07	-0.0239642	18	99.58	62.1906	NELQETASKESQVPL	S	124	VVQANELQETASKESQVPLTIEK	[12] Phospho (STY)	6.6122	0.00521826	6	NELQETASKESQVPL	S	124								26134.2	43905.5	39149.6	21130.9	18042.3	19985.6	26094.2	36310.8	35098.7	13341.7	20812.5	22829.2	32312.3	36536.3	37915.3
86	533.258	2	1064.5	32.1048	1.5755	2.77008	A0A0H3BZ85	Putative endopeptidase Clp ATP-binding chain C OS=Streptococcus pyogenes serotype M49 (strain NZ131) OX=471876 GN=clpC PE=3 SV=1	ELTSGHTLK	ELTSGHTLK	[4] Phospho (STY)	44.53	10.2353	17	95.94	78.5956	ILSRELTSGHTLKIG	S	796					0				ELTSGHTLK	[4] Phospho (STY)	86.5344	10.285	ILSRELTSGHTLKIG	S	796	7699.94	15048.8	12463.5	9041.08	8453.33	8537.73	8135.24	12637.4	11946.8	51304.7	78951.9	71813.6	8017.56	10937.2	10085.1
87	708.79	2	1415.57	46.3934	1.112	3.60111	B5XKI1	Elongation factor Tu OS=Streptococcus pyogenes serotype M49 (strain NZ131) OX=471876 GN=tuf PE=3 SV=1	DYASIDAAPEER	DYASIDAAPEER	[4] Phospho (STY)	75.11	4.03223	30	100	99.9973	NQPKDYASIDAAPEE	S	52	DYASIDAAPEER	[4] Phospho (STY)	8.2218	4.01561	22	NQPKDYASIDAAPEE	S	52	DYASIDAAPEER	[4] Phospho (STY)	87.8926	3.99898	NQPKDYASIDAAPEE	S	52	12499.3	20620.7	17515	10942	9685.51	9777.38	10351.6	16250.9	14531.1	47759	67480.4	64530.5	15670.2	19343.8	18929.4
95	793.7	3	2378.08	44.2308	0.812133	3.60111	B5XI23	Protein translocase subunit SecA OS=Streptococcus pyogenes serotype M49 (strain NZ131) OX=471876 GN=secA PE=3 SV=1	ATTAAPQNIQSQQSANTDDLPK	ATTAAPQNIQSQQSANTDDLPK	[17] Phospho (STY)	124.54	1.24258	28	99.99	93.4317	QSQQSANTDDLPKVE	T	809	ATTAAPQNIQSQQSANTDDLPK	[17] Phospho (STY)	7.3676	1.23268	28	QSQQSANTDDLPKVE	T	809	ATTAAPQNIQSQQSANTDDLPK	[17] Phospho (STY)	55.448	1.21289	QSQQSANTDDLPKVE	T	809	60184.4	85449.7	76064.6	27314.4	25374.1	25538.7	37196.7	50777.8	49092.9	7879.26	12696.6	12758.4	68519.9	81460.6	83128.5
97	683.656	3	2047.95	53.4175	1.51382	2.90859	A0A0H3BYP4	Phosphoglucosamine mutase OS=Streptococcus pyogenes serotype M49 (strain NZ131) OX=471876 GN=glmM PE=3 SV=1	ASAGVMISASHNPALDNGIK	ASAGVMISASHNPALDNGIK	[6] Oxidation (M)|[10] Phospho (STY)	144.1	3.46839	26	99.81	81.9854	AGVMISASHNPALDN	S	100					0				ASAGVMISASHNPALDNGIK	[6] Oxidation (M)|[10] Phospho (STY)	41.5355	3.43392	AGVMISASHNPALDN	S	100	30011.1	75245.2	40849	7433.74	6771.7	8060.29	37016.4	65006.9	54509.3	85985.5	107683	111692	43562.4	46571.8	51247.3
98	628.273	2	1254.53	28.0057	1.1935	3.11634	A0A0H3BZL9	PTS system_ fructose-specific IIABC component OS=Streptococcus pyogenes serotype M49 (strain NZ131) OX=471876 GN=fruA PE=4 SV=1	VETNGASGVANR	VETNGASGVANR	[4] Deamidation (N)|[7] Phospho (STY)	77.06	6.47001	28	100	96.0383	KVETNGASGVANRLT	S	205	VETNGASGVANR	[4] Deamidation (N)|[7] Phospho (STY)	7.3733	6.45125	17	KVETNGASGVANRLT	S	205	VETNGASGVANR	[4] Deamidation (N)|[7] Phospho (STY)	80.9671	6.51221	KVETNGASGVANRLT	S	205	14572.2	26769.3	24499.6	12288.5	11659.2	11471.7	12155.8	16923.1	15536.7	49155.4	68824.3	63381.1	16499	21484.3	21109.8
101	646.617	3	1936.83	50.7513	1.73158	3.39335	A0A0H3BZL9	PTS system_ fructose-specific IIABC component OS=Streptococcus pyogenes serotype M49 (strain NZ131) OX=471876 GN=fruA PE=4 SV=1	EEQTSTGLGDGIAMPHSK	EEQTSTGLGDGIAMPHSK	[4] Phospho (STY)	91.36	3.18712	11	96.6	57.1655	IMTREEQTSTGLGDG	T	55	EEQTSTGLGDGIAMPHSK	[4] Phospho (STY)	7.3738	3.2266	15	IMTREEQTSTGLGDG	T	55	EEQTSTGLGDGIAMPHSK	[4] Phospho (STY)	84.574	3.2023	IMTREEQTSTGLGDG	T	55	28491.9	6190.59	34390.4	9578.35	8137.01	7960.11	20708.3	26600.5	27756.5	101256	133401	131406	39364.1	47895.7	48870.1
110	643.314	2	1284.61	40.903	0.6685	3.53186	A0A0H3BZ43	Uncharacterized protein OS=Streptococcus pyogenes serotype M49 (strain NZ131) OX=471876 GN=Spy49_1003c PE=3 SV=1	NTSKDLTSAIR	NTSKDLTSAIR	[2] Phospho (STY)	71.83	4.74747	7	97.75	81.949	TETYIKNTSKDLTSA	T	9	NTSKDLTSAIR	[2] Phospho (STY)	7.3953	4.80699	5	TETYIKNTSKDLTSA	T	9	NTSKDLTSAIR	[3] Phospho (STY)	68.5086	4.69251	ETYIKNTSKDLTSAI	S	10	8633.25	13359.8	11885.7	10942.5	9883.93	8207.75	9422.33	13552.2	10861.7	32740.5	45345.8	38565.5	12066.5	14429.3	12553
117	603.967	3	1808.88	48.4535	0.927633	3.04709	A0A0H3BZD6	Putative PTS system enzyme II OS=Streptococcus pyogenes serotype M49 (strain NZ131) OX=471876 GN=Spy49_1737c PE=4 SV=1	LPETPVSDAPVATAPHK	LPETPVSDAPVATAPHK	[7] Phospho (STY)	59.44	5.28358	25	98.93	86.2212	KLPETPVSDAPVATA	S	507	LPETPVSDAPVATAPHK	[7] Phospho (STY)	5.6049	5.32585	3	KLPETPVSDAPVATA	S	507	LPETPVSDAPVATAPHK	[7] Phospho (STY)	72.0341	5.24455	KLPETPVSDAPVATA	S	507	18743.9	26690.9	23870.3	17635.1	16963.7	19557.8	15463.4	22568.7	21722.9	61462.2	77050.8	81490.1	21972.9	26564.3	26051.8
120	559.272	2	1116.53	56.5402	0.907133	2.97784	B5XKM7	Enolase OS=Streptococcus pyogenes serotype M49 (strain NZ131) OX=471876 GN=eno PE=3 SV=1	SIITDVYAR	SIITDVYAR	[1] Phospho (STY)	57.77	6.3189	23	100	98.9152	------MSIITDVYA	S	2					0				SIITDVYAR	[1] Phospho (STY)	96.4934	6.27675	------MSIITDVYA	S	2	28372.5	44500.1	36430.4	29983.7	30400.2	30602.6	34246.7	49767.8	45993.5	29857.9	42955.2	44192.3	17558.6	22417.9	22065.9
134	679.31	2	1356.61	75.1925	0.988917	3.53186	A0A0H3C124	Putative mannose-specific phosphotransferase system component IID OS=Streptococcus pyogenes serotype M49 (strain NZ131) OX=471876 GN=manN PE=4 SV=1	DMSGGILQDITK	DMSGGILQDITK	[3] Phospho (STY)	88.67	4.05025	30	100	99.9913	SEITKDMSGGILQDI	S	174	DMSGGILQDITK	[3] Phospho (STY)	7.6609	4.0329	20	SEITKDMSGGILQDI	S	174	DMSGGILQDITK	[3] Phospho (STY)	83.6484	4.01556	SEITKDMSGGILQDI	S	174	9177	1316.8	11078.4	10667.9	6914.08	7076.1	6781.08	9287.2	10615.1	37820.8	55100.9	60573.7	10866.3	13177.9	13574.8
139	687.307	2	1372.6	67.9218	1.02988	3.53186	A0A0H3C124	Putative mannose-specific phosphotransferase system component IID OS=Streptococcus pyogenes serotype M49 (strain NZ131) OX=471876 GN=manN PE=4 SV=1	DMSGGILQDITK	DMSGGILQDITK	[2] Oxidation (M)|[3] Phospho (STY)	93.46	3.32069	29	100	99.9938	SEITKDMSGGILQDI	S	174	DMSGGILQDITK	[2] Oxidation (M)|[3] Phospho (STY)	7.6044	3.30355	20	SEITKDMSGGILQDI	S	174								9266.95	30973.2	17217.7	10781.6	11438.7	14276	5215.86	12856.5	10628	44816.1	66188.1	69567.4	7479.91	11733.9	9689.78
145	651.949	3	1952.82	41.2438	0.968283	3.39335	A0A0H3BZL9	PTS system_ fructose-specific IIABC component OS=Streptococcus pyogenes serotype M49 (strain NZ131) OX=471876 GN=fruA PE=4 SV=1	EEQTSTGLGDGIAMPHSK	EEQTSTGLGDGIAMPHSK	[4] Phospho (STY)|[14] Oxidation (M)	116.35	2.89865	18	97.2	64.775	IMTREEQTSTGLGDG	T	55	EEQTSTGLGDGIAMPHSK	[4] Phospho (STY)|[14] Oxidation (M)	7.2639	2.93781	14	IMTREEQTSTGLGDG	T	55	EEQTSTGLGDGIAMPHSK	[6] Phospho (STY)|[14] Oxidation (M)	79.8062	2.96491	TREEQTSTGLGDGIA	T	57	18201.6	74004.2	31740.1	9817.27	10861.9	12254.7	15085.6	27606.2	21288.2	77540.9	109904	104070	21089.3	28812.7	25722.9
147	636.958	3	1907.85	51.4401	0.68885	2.63158	A0A0H3C0G3	Uncharacterized protein OS=Streptococcus pyogenes serotype M49 (strain NZ131) OX=471876 GN=Spy49_1599c PE=4 SV=1	AGSHPQTSQINVGEFEK	AGSHPQTSQINVGEFEK	[7] Phospho (STY)	52.33	6.03002	3	55.06	48.2	KAGSHPQTSQINVGE	T	67	AGSHPQTSQINVGEFEK	[8] Phospho (STY)	7.3753	6.0701	19	AGSHPQTSQINVGEF	S	68	AGSHPQTSQINVGEFEK	[7] Phospho (STY)	88.1225	6.09785	KAGSHPQTSQINVGE	T	67	13823.2	20961.5	18248	11455.5	11260.6	12587.4	9383.85	12666.5	12248.2	77728.9	98426.1	106264	18606.4	21171.6	21495
150	939.454	2	1876.89	39.0074	1.5552	5.47091	A0A0H3BY55	Non-specific serine/threonine protein kinase OS=Streptococcus pyogenes serotype M49 (strain NZ131) OX=471876 GN=Spy49_1257c PE=4 SV=1	LDQTNQTDALQPPTKK	LDQTNQTDALQPPTKK	[4] Phospho (STY)	74.47	0.157493	28	99.97	96.7707	QESRLDQTNQTDALQ	T	324	LDQTNQTDALQPPTKK	[4] Phospho (STY)	7.1778	0.198234	18	QESRLDQTNQTDALQ	T	324	LDQTNQTDALQPPTKK	[4] Phospho (STY)	63.2607	0.226437	QESRLDQTNQTDALQ	T	324	42932.1	75003.4	59140	18934.3	17825.9	11019.1	33222.4	63383.4	42851.5	13963.9	26084.2	16407	51581.2	55396	44351.9
158	848.435	2	1694.85	60.0117	0.770767	5.0554	A0A0H3BY55	Non-specific serine/threonine protein kinase OS=Streptococcus pyogenes serotype M49 (strain NZ131) OX=471876 GN=Spy49_1257c PE=4 SV=1	IIFEDVESTKPLPK	IIFEDVESTKPLPK	[9] Phospho (STY)	72.4	0.836667	25	93.01	63.5172	IFEDVESTKPLPKVA	T	291	IIFEDVESTKPLPK	[9] Phospho (STY)	6.8843	0.822782	11	IFEDVESTKPLPKVA	T	291								39258.1	62323.8	48069.4	17013.3	16504.4	10809.7	26761.2	42570.3	31656.3	9105.03	14801.5	10391.1	31678.9	36308	27219.5
186	751.35	2	1500.69	59.9371	1.15247	3.94737	A0A0H3BXR4	Ribonucleoside-diphosphate reductase OS=Streptococcus pyogenes serotype M49 (strain NZ131) OX=471876 GN=nrdE1 PE=3 SV=1	YQPATPSFLNAGR					0						YQPATPSFLNAGR	[5] Phospho (STY)	6.6584	6.62702	3	NQRYQPATPSFLNAG	T	155	YQPATPSFLNAGR	[5] Phospho (STY)	60.0387	6.61134	NQRYQPATPSFLNAG	T	155	598.499	1575.43	1351.7	1617.38	1577.2	1493.47	587.504	1290.24	974.345	705.167	1312.91	1228	2281.25	3028.39	2629.87
192	693.838	2	1385.66	64.3965	0.771033	3.87812	B5XMJ7	Cell cycle protein GpsB OS=Streptococcus pyogenes serotype M49 (strain NZ131) OX=471876 GN=gpsB PE=3 SV=1	VAQSATNFDILK	VAQSATNFDILK	[6] Phospho (STY)	103.01	1.82273	25	99.97	95.8808	TRVAQSATNFDILKR	T	86	VAQSATNFDILK	[6] Phospho (STY)	7.4388	1.87791	13	TRVAQSATNFDILKR	T	86	VAQSATNFDILK	[6] Phospho (STY)	76.2954	1.78876	TRVAQSATNFDILKR	T	86	20432.7	35062.9	29230.4	10494	9673.94	10162.6	11879.6	21588.9	20951.7	4800.65	7845.13	7786.15	23164.2	29107.5	27990.7
193	711.836	2	1421.66	42.0146	0.668383	3.67036	A0A0H3C2P8	Uncharacterized protein OS=Streptococcus pyogenes serotype M49 (strain NZ131) OX=471876 GN=Spy49_1748c PE=4 SV=1	KETIELANDGPR	KETIELANDGPR	[3] Phospho (STY)	101.08	1.2732	30	100	100	DEFIRKETIELANDG	T	13					0											25221	39640.2	31912.8	10218.3	9065.56	7283.78	16558	23396.4	20187.9	6689.7	8256.01	8955.61	33164.2	32280.5	31707
199	599.3	2	1196.59	28.8513	0.463783	3.11634	A0A0H3C1S0	CsbD domain-containing protein OS=Streptococcus pyogenes serotype M49 (strain NZ131) OX=471876 GN=Spy49_1665c PE=3 SV=1	SKIEQASGGLK	SKIEQASGGLK	[7] Phospho (STY)	53.98	4.20514	29	100	99.8483	KSKIEQASGGLKEGA	S	14	SKIEQASGGLK	[7] Phospho (STY)	7.6174	4.18547	17	KSKIEQASGGLKEGA	S	14	SKIEQASGGLK	[7] Phospho (STY)	79.2836	4.1658	KSKIEQASGGLKEGA	S	14	7420.75	14068.2	11851.6	12494.3	11392	9792.94	6933	11058.1	9752.32	6860.94	11411.7	10551.2	4509.28	5961.49	4849.65
201	491.738	2	981.462	29.6429	1.13223	2.63158	A0A0H3C1S0	CsbD domain-containing protein OS=Streptococcus pyogenes serotype M49 (strain NZ131) OX=471876 GN=Spy49_1665c PE=3 SV=1	IEQASGGLK	IEQASGGLK	[5] Phospho (STY)	58.65	8.92351	28	100	100	KSKIEQASGGLKEGA	S	14					0				IEQASGGLK	[5] Phospho (STY)	71.7535	8.87556	KSKIEQASGGLKEGA	S	14	9169.55	16448.3	14269.2	14052	12987.2	13989.2	9280.99	13220.4	12271.1	9117.95	14553.5	14803.7	5830.39	8162.69	7727.22
203	685.323	2	1368.63	38.1208	0.709633	3.60111	A0A0H3BZ18	Cell-division initiation protein OS=Streptococcus pyogenes serotype M49 (strain NZ131) OX=471876 GN=divIVA PE=4 SV=1	ATANAEATNLVSK	ATANAEATNLVSK	[12] Phospho (STY)	97.18	2.76224	29	100	98.8579	AEATNLVSKATYDAQ	S	94	ATANAEATNLVSK	[12] Phospho (STY)	7.3371	2.74505	21	AEATNLVSKATYDAQ	S	94	ATANAEATNLVSK	[12] Phospho (STY)	87.2835	2.72785	AEATNLVSKATYDAQ	S	94	4649.13	7818.85	7288.48	2487.52	2321.07	2418.36	5156.5	8183.82	7339.28	37380.6	53097	50438.3	6955.09	9679.78	8708.49
221	621.549	4	2482.17	49.9674	0.627433	3.11634	A0A0H3BZD6	Putative PTS system enzyme II OS=Streptococcus pyogenes serotype M49 (strain NZ131) OX=471876 GN=Spy49_1737c PE=4 SV=1	TEDEAKLPETPVSDAPVATAPHK	TEDEAKLPETPVSDAPVATAPHK	[13] Phospho (STY)	124.73	2.18843	30	99.99	96.3093	KLPETPVSDAPVATA	S	507	TEDEAKLPETPVSDAPVATAPHK	[13] Phospho (STY)	6.1157	2.17895	4	KLPETPVSDAPVATA	S	507	TEDEAKLPETPVSDAPVATAPHK	[13] Phospho (STY)	53.6302	2.1505	KLPETPVSDAPVATA	S	507	11322.5	14518.2	14312.3	7681.89	7174.27	10337.1	9374.51	11374.4	13416.6	39911.9	50055.3	63934.2	12212.7	15325	18110.2
225	475.743	2	949.472	29.7862	1.65008	2.42382	B5XIW7	60 kDa chaperonin OS=Streptococcus pyogenes serotype M49 (strain NZ131) OX=471876 GN=groL PE=3 SV=1	AIAQPVSGK	AIAQPVSGK	[7] Phospho (STY)	35.47	9.41238	8	100	100	KAIAQPVSGKEAIAQ	S	138					0				AIAQPVSGK	[7] Phospho (STY)	57.846	9.36281	KAIAQPVSGKEAIAQ	S	138	8018.99	14052.2	12848.8	12919.4	12185.3	11961.8	10616.2	14651.2	14388.9	20640.1	33847.7	36401	9464.91	13299.1	12503.6
234	828.097	3	2481.27	82.1562	0.832583	4.15512	A0A0H3C1H3	Fructose-bisphosphate aldolase class II OS=Streptococcus pyogenes serotype M49 (strain NZ131) OX=471876 GN=fba PE=4 SV=1	LTAAVPGFPIVLHGGSGIPDDQIK	LTAAVPGFPIVLHGGSGIPDDQIK	[16] Phospho (STY)	50.49	1.09248	4	100	99.95	PIVLHGGSGIPDDQI	S	211	LTAAVPGFPIVLHGGSGIPDDQIK	[16] Phospho (STY)	8.0421	1.12329	7	PIVLHGGSGIPDDQI	S	211	LTAAVPGFPIVLHGGSGIPDDQIK	[16] Phospho (STY)	44.3627	1.14463	PIVLHGGSGIPDDQI	S	211	235.913	1112.79	118.335	5266.48	3058.13	3626.75	1520.46	2627.41	2508.99	3162.35	6129.54	7077.6	11178.6	16967.6	15693.1
235	535.937	3	1604.79	56.0969	1.26822	2.56233	A0A0H3BY55	Non-specific serine/threonine protein kinase OS=Streptococcus pyogenes serotype M49 (strain NZ131) OX=471876 GN=Spy49_1257c PE=4 SV=1	LSPPTPTVLTQESR	LSPPTPTVLTQESR	[10] Phospho (STY)	93.27	4.15844	25	99.97	93.5956	PPTPTVLTQESRLDQ	T	316	LSPPTPTVLTQESR	[10] Phospho (STY)	6.7864	4.20609	17	PPTPTVLTQESRLDQ	T	316								35650.8	45975.2	45117.7	12620.8	12706	22898.5	30836.7	39543.6	44055.8	11681	16622.2	28260.7	31867.1	51475.4	60413.1
242	652.319	3	1953.94	51.1739	0.783883	3.11634	A0A0H3BZR7	Mid-cell-anchored protein Z OS=Streptococcus pyogenes serotype M49 (strain NZ131) OX=471876 GN=mapZ PE=3 SV=1	EVEVTKESQTLGLNEAK	EVEVTKESQTLGLNEAK	[5] Phospho (STY)	72.53	3.14719	11	99.74	91.9391	ESKEVEVTKESQTLG	T	11	EVEVTKESQTLGLNEAK	[5] Phospho (STY)	8.0852	3.13514	26	ESKEVEVTKESQTLG	T	11	EVEVTKESQTLGLNEAK	[8] Phospho (STY)	60.0439	3.21341	EVEVTKESQTLGLNE	S	14	23607.3	36303.9	31347.7	12115.9	10889.6	13418.8	19001.7	29603.5	27243.7	5089.39	7284.42	7740.35	22730.8	31588	31063.4
243	657.309	3	1968.91	49.5038	0.70935	2.83934	A0A0H3C2S7	Uncharacterized protein OS=Streptococcus pyogenes serotype M49 (strain NZ131) OX=471876 GN=Spy49_1801c PE=4 SV=1	LLSHQSMGYGQPLEVSK	LLSHQSMGYGQPLEVSK	[6] Phospho (STY)|[7] Oxidation (M)	54.01	1.75387	12	95.58	62.85	EKLLSHQSMGYGQPL	S	110	LLSHQSMGYGQPLEVSK	[6] Phospho (STY)|[7] Oxidation (M)	7.4591	1.74192	7	EKLLSHQSMGYGQPL	S	110	LLSHQSMGYGQPLEVSK	[6] Phospho (STY)|[7] Oxidation (M)	64.9436	1.7688	EKLLSHQSMGYGQPL	S	110	26444.6	72515.3	38542.1	7080.08	7151.55	8808.49	12330.7	20516.7	16407.2	4519.86	6270.07	7184.44	31974.3	38954.4	37636.7
245	1025.22	4	4096.83	62.6164	2.12065	3.80886	A0A0H3BZ18	Cell-division initiation protein OS=Streptococcus pyogenes serotype M49 (strain NZ131) OX=471876 GN=divIVA PE=4 SV=1	RVDESNKELEAYQLDSQSDSTTEPEVNLSETQTFK	RVDESNKELEAYQLDSQSDSTTEPEVNLSETQTFK	[31] Phospho (STY)	164.59	1.03124	4	99.26	78.3575	PEVNLSETQTFKLNI	T	245	RVDESNKELEAYQLDSQSDSTTEPEVNLSETQTFK	[31] Phospho (STY)	7.6682	1.04991	11	PEVNLSETQTFKLNI	T	245								15746.9	17179.5	13404.5	25681.8	19426.7	56810.8	10637.9	8832.18	29752.4	236.691	451.029	5230.62	216665	222905	342413
253	651.974	3	1952.9	54.9722	1.11153	2.83934	A0A0H3C2S7	Uncharacterized protein OS=Streptococcus pyogenes serotype M49 (strain NZ131) OX=471876 GN=Spy49_1801c PE=4 SV=1	LLSHQSMGYGQPLEVSK	LLSHQSMGYGQPLEVSK	[6] Phospho (STY)	40.12	-3.73564	5	55.3	51.006	EKLLSHQSMGYGQPL	S	110	LLSHQSMGYGQPLEVSK	[3] Phospho (STY)	7.2974	-3.7477	5	RLQEKLLSHQSMGYG	S	107								24422	7495.05	29297.3	11174.2	9193.26	9392.91	13274.3	15589.5	19399.6	4388.12	5907.09	6705.66	34098.1	42114.1	44437.2
254	854.393	3	2560.16	59.589	0.968183	4.77839	A0A0H3BYW2	EIICB-Lac OS=Streptococcus pyogenes serotype M49 (strain NZ131) OX=471876 GN=lacE PE=4 SV=1	VYDEQILAEEAAGTNSSDALKEK	VYDEQILAEEAAGTNSSDALKEK	[17] Phospho (STY)	79.4	0.105909	7	49.26	39.2871	EAAGTNSSDALKEKV	S	428	VYDEQILAEEAAGTNSSDALKEK	[17] Phospho (STY)	7.0388	0.0967172	5	EAAGTNSSDALKEKV	S	428	VYDEQILAEEAAGTNSSDALKEK	[17] Phospho (STY)	41.9277	0.117393	EAAGTNSSDALKEKV	S	428	7869.27	14962.4	13025.4	6494.32	6093.37	6767.88	3431.48	7720	7179.9	38569.7	54342.5	65929.4	9796.32	13438.1	12815.4
255	495.579	3	1483.72	36.3813	0.627633	2.77008	B5XKI2	Triosephosphate isomerase OS=Streptococcus pyogenes serotype M49 (strain NZ131) OX=471876 GN=tpiA PE=3 SV=1	VQYGGSVKPENVK	VQYGGSVKPENVK	[6] Phospho (STY)	67.06	5.70978	8	100	99.9425	VRVQYGGSVKPENVK	S	214	VQYGGSVKPENVK	[6] Phospho (STY)	8.3855	5.69392	10	VRVQYGGSVKPENVK	S	214	VQYGGSVKPENVK	[6] Phospho (STY)	54.1245	5.79699	VRVQYGGSVKPENVK	S	214	2723.83	5499.12	4412.94	3774.62	3595.23	3956.81	2698.07	3471.18	3770.56	6427.36	9879.95	10110.9	3139.49	5129.33	4614.74
288	634.963	3	1901.87	49.4423	0.627417	2.83934	B5XKG9	Lysine--tRNA ligase OS=Streptococcus pyogenes serotype M49 (strain NZ131) OX=471876 GN=lysS PE=3 SV=1	SNQHIEELNDQQIVR	SNQHIEELNDQQIVR	[1] Phospho (STY)	105.15	1.99333	24	100	100	------MSNQHIEEL	S	2	SNQHIEELNDQQIVR	[1] Phospho (STY)	6.9145	1.98095	30	------MSNQHIEEL	S	2	SNQHIEELNDQQIVR	[1] Phospho (STY)	82.0842	1.9562	------MSNQHIEEL	S	2	14175.7	20005.8	18318.4	11215	9740.82	11573.1	15800.2	20471.5	19789.8	11927.8	16503.6	17439.1	10528.8	12562.5	12386.4
291	665.81	2	1329.61	55.0132	1.5547	3.3241	B5XJM0	Glucose-6-phosphate isomerase OS=Streptococcus pyogenes serotype M49 (strain NZ131) OX=471876 GN=pgi PE=3 SV=1	SGTTTEPAIAFR	SGTTTEPAIAFR	[4] Phospho (STY)	62.31	6.37041	6	84.3	63.785	VISKSGTTTEPAIAF	T	149					0											1941.07	3755.19	3304.68	2344.95	3061.13	2675.53	1294.76	2429.74	1973.69	3816.21	5657.17	5417.96	3472.82	4657.6	4303.74
302	535.252	2	1068.49	37.3498	0.948033	2.77008	A0A0H3C004	Uncharacterized protein OS=Streptococcus pyogenes serotype M49 (strain NZ131) OX=471876 GN=Spy49_0627 PE=4 SV=1	IVDDTIGTR	IVDDTIGTR	[5] Phospho (STY)	54.61	3.56357	28	99.89	97.0646	EEKIVDDTIGTRTRK	T	14					0				IVDDTIGTR	[5] Phospho (STY)	93.8195	3.61311	EEKIVDDTIGTRTRK	T	14	10043	18840.9	15132.5	4672.28	4669.47	5439.85	8507.87	11660.8	12097.5	6283.73	10239	10425.4	11328	15093.3	13908
312	791.892	2	1581.77	65.1191	0.88655	4.22438	A0A0H3BYB3	APH domain-containing protein OS=Streptococcus pyogenes serotype M49 (strain NZ131) OX=471876 GN=Spy49_1343c PE=4 SV=1	TTTEQELTLTPLR	TTTEQELTLTPLR	[2] Phospho (STY)	96.61	2.33069	25	49.74	48.4928	-----MTTTEQELTL	T	3	TTTEQELTLTPLR	[1] Phospho (STY)	7.0339	2.31581	3	------MTTTEQELT	T	2								9370.99	17911.1	15057.8	15274.3	12596.1	11687.1	6087.83	13896.8	11670.7	5091.35	10213.6	9497.48	12476.5	17618.9	15484.2
313	474.895	3	1421.66	42.0146	1.17312	2.28532	A0A0H3C2P8	Uncharacterized protein OS=Streptococcus pyogenes serotype M49 (strain NZ131) OX=471876 GN=Spy49_1748c PE=4 SV=1	KETIELANDGPR	KETIELANDGPR	[3] Phospho (STY)	101.08	5.21518	29	100	100	DEFIRKETIELANDG	T	13					0				KETIELANDGPR	[3] Phospho (STY)	82.8193	5.23586	DEFIRKETIELANDG	T	13	15574.9	23798.4	22023.4	5059.67	4860.05	5557.09	11414.3	14653.6	15454.7	2660.68	4123.3	4663.52	20511.3	25145.9	26684.4
316	651.018	3	1950.03	45.2813	0.702217	3.67036	B5XM21	Uridine kinase OS=Streptococcus pyogenes serotype M49 (strain NZ131) OX=471876 GN=udk PE=3 SV=1	KPIIIGVTGGSGGGKTSVSR	KPIIIGVTGGSGGGKTSVSR	[16] Phospho (STY)	58.58	0.967675	13	84.1	66.1746	GGSGGGKTSVSRAIL	T	19					0				KPIIIGVTGGSGGGKTSVSR	[16] Phospho (STY)	56.0309	0.93147	GGSGGGKTSVSRAIL	T	19	6755.46	12849.6	10268.7	9310.93	8941.5	8448.52	8017.34	12574.8	10727.3	7415.77	12550.9	10921.5	8391.87	10404.6	8772.5
333	621.549	4	2482.17	47.8052	0.648133	3.25485	A0A0H3BZD6	Putative PTS system enzyme II OS=Streptococcus pyogenes serotype M49 (strain NZ131) OX=471876 GN=Spy49_1737c PE=4 SV=1	TEDEAKLPETPVSDAPVATAPHK	TEDEAKLPETPVSDAPVATAPHK	[10] Phospho (STY)	127.68	1.42546	25	99.98	88.6756	DEAKLPETPVSDAPV	T	504	TEDEAKLPETPVSDAPVATAPHK	[10] Phospho (STY)	5.9188	1.41598	4	DEAKLPETPVSDAPV	T	504	TEDEAKLPETPVSDAPVATAPHK	[10] Phospho (STY)	69.3616	1.39701	DEAKLPETPVSDAPV	T	504	6271.96	9135.15	7732.87	4172.99	3627.82	4417.17	5216.87	7021.92	7818.84	25673.1	34750.5	41916.5	6919.97	9858.02	10973.8
336	569.277	3	1704.81	41.1078	0.586433	2.70083	A0A0H3BYA0	PTS system_ IIB component_ putative OS=Streptococcus pyogenes serotype M49 (strain NZ131) OX=471876 GN=Spy49_1328c PE=4 SV=1	ILAACGAGVNSSHQIK	ILAACGAGVNSSHQIK	[5] Carbamidomethyl (C)|[11] Phospho (STY)	93.31	3.5261	8	50.35	50.0389	ACGAGVNSSHQIKDA	S	14	ILAACGAGVNSSHQIK	[5] Carbamidomethyl (C)|[11] Phospho (STY)	7.8621	3.5123	4	ACGAGVNSSHQIKDA	S	14	ILAACGAGVNSSHQIK	[5] Carbamidomethyl (C)|[11] Phospho (STY)	76.6332	3.602	ACGAGVNSSHQIKDA	S	14	8888.05	12850	12875.1	3467.3	3290.24	3402.63	10620.4	13740.6	14192.2	19596.8	28577.6	28784.1	9840.76	12063.7	11919.4
353	1136.56	1	1135.55	58.3208	0.627667	10.3878	A0A0H3BXI0	Uncharacterized protein OS=Streptococcus pyogenes serotype M49 (strain NZ131) OX=471876 GN=Spy49_1001c PE=3 SV=1	DIPAIAESIK	DIPAIAESIK	[8] Phospho (STY)	55.62	1.11421	28	100	100	DIPAIAESIKAIVSQ	S	85	DIPAIAESIK	[8] Phospho (STY)	8.6226	1.09349	8	DIPAIAESIKAIVSQ	S	85								183.15	1829.85	1624.2	1264.89	1247.11	1245.31	750.932	1797.82	1996.59	6596.89	14638.6	14558.6	526.011	1250.08	1194.18
356	1131.48	2	2260.94	60.4958	4.74588	6.09418	A0A0H3BZ18	Cell-division initiation protein OS=Streptococcus pyogenes serotype M49 (strain NZ131) OX=471876 GN=divIVA PE=4 SV=1	TVLNEDIPESDDSASFDATR	TVLNEDIPESDDSASFDATR	[19] Phospho (STY)	77.67	0.314399	19	99.67	91.2747	DSASFDATRQFTPEE	T	201	TVLNEDIPESDDSASFDATR	[19] Phospho (STY)	8.1055	0.34822	19	DSASFDATRQFTPEE	T	201								37929.9	105188	82180.9	111853	89854	78959.7	80300.2	133967	125671	26850.7	50279.9	44834.4	44286.5	52943.2	47682.6
368	628.272	2	1254.53	30.4883	1.57547	3.11634	A0A0H3BZL9	PTS system_ fructose-specific IIABC component OS=Streptococcus pyogenes serotype M49 (strain NZ131) OX=471876 GN=fruA PE=4 SV=1	VETNGASGVANR	VETNGASGVANR	[4] Deamidation (N)|[7] Phospho (STY)	89.47	3.65882	32	100	98.9803	KVETNGASGVANRLT	S	205	VETNGASGVANR	[4] Deamidation (N)|[7] Phospho (STY)	7.1676	3.64006	6	KVETNGASGVANRLT	S	205	VETNGASGVANR	[4] Deamidation (N)|[7] Phospho (STY)	86.1453	3.70102	KVETNGASGVANRLT	S	205	4433.73	10330	8573.61	5540.02	5135.37	4450.02	3428.21	6299.22	6002.48	18490.9	29586.7	29054.6	5866.23	8324.24	8036.77
371	742.862	2	1483.71	36.3813	0.6278	3.87812	B5XKI2	Triosephosphate isomerase OS=Streptococcus pyogenes serotype M49 (strain NZ131) OX=471876 GN=tpiA PE=3 SV=1	VQYGGSVKPENVK	VQYGGSVKPENVK	[6] Phospho (STY)	67.76	1.39577	9	100	99.9467	VRVQYGGSVKPENVK	S	214	VQYGGSVKPENVK	[6] Phospho (STY)	8.3855	1.37991	13	VRVQYGGSVKPENVK	S	214	VQYGGSVKPENVK	[6] Phospho (STY)	76.6807	1.48299	VRVQYGGSVKPENVK	S	214	1149.2	2894.35	2081.57	2000.09	1795.47	1143.97	962.328	1775.72	1395.79	3294.97	6402.19	4182.28	1256.39	2123.81	1657.55
385	683.983	3	2048.93	55.1491	0.824833	2.97784	A0A0H3BYP4	Phosphoglucosamine mutase OS=Streptococcus pyogenes serotype M49 (strain NZ131) OX=471876 GN=glmM PE=3 SV=1	ASAGVMISASHNPALDNGIK	ASAGVMISASHNPALDNGIK	[6] Oxidation (M)|[10] Phospho (STY)|[17] Deamidation (N)	70.47	1.18677	9	91.64	60.8222	AGVMISASHNPALDN	S	100					0											7675.45	23171.5	13241.3	1564.13	1430.56	1614.29	13447.9	24180.5	16707.7	27117.4	36351.3	40966.7	11477.5	14884.3	15176.2
405	452.703	2	903.391	34.1238	0.7709	2.35457	A0A0H3BZJ0	Formate acetyltransferase OS=Streptococcus pyogenes serotype M49 (strain NZ131) OX=471876 GN=pfl PE=3 SV=1	AYTSNIR	AYTSNIR	[4] Phospho (STY)	37.04	6.67286	12	90.81	80.1033	GIFRAYTSNIRRARH	S	155					0				AYTSNIR	[4] Phospho (STY)	92.9379	6.73145	GIFRAYTSNIRRARH	S	155	2524.59	4644.66	3984.78	1921.24	1673.51	1890.39	1987.33	3179.98	3008.69	17294.2	27312.3	26129.5	2535.62	3652.91	3429.4
414	666.291	2	1330.57	23.5049	0.784017	3.3241	A0A0H3BZL9	PTS system_ fructose-specific IIABC component OS=Streptococcus pyogenes serotype M49 (strain NZ131) OX=471876 GN=fruA PE=4 SV=1	NGKSETAVSTEK	NGKSETAVSTEK	[1] Deamidation (N)|[4] Phospho (STY)	74.91	1.65283	17	99.83	95.5129	YHAKNGKSETAVSTE	S	274	NGKSETAVSTEK	[1] Deamidation (N)|[4] Phospho (STY)	6.7286	1.63515	16	YHAKNGKSETAVSTE	S	274	NGKSETAVSTEK	[1] Deamidation (N)|[4] Phospho (STY)	57.2394	1.69262	YHAKNGKSETAVSTE	S	274	3139.41	8122.33	6541.88	2150.61	1993.84	1764.03	2427.06	4701.31	4478.53	6874.85	11508	10129.8	4111.21	5053.73	4439.31
418	620.779	2	1239.54	28.313	0.709567	3.3241	B5XK64	Ribosome-recycling factor OS=Streptococcus pyogenes serotype M49 (strain NZ131) OX=471876 GN=frr PE=3 SV=1	FAQSHQSLSR	FAQSHQSLSR	[7] Phospho (STY)	52.06	2.43052	7	98.71	96.5557	RFAQSHQSLSREYAS	S	19	FAQSHQSLSR	[7] Phospho (STY)	6.5696	2.41154	5	RFAQSHQSLSREYAS	S	19	FAQSHQSLSR	[9] Phospho (STY)	66.9799	2.37357	AQSHQSLSREYASIR	S	21	1397.23	3339.71	2493.54	2222.87	1962.85	1537.48	1099.89	2027.64	1683.41	8345.44	14197.4	11834.1	1795.95	2233.48	1867.43
432	672.804	2	1343.59	29.0972	0.566217	3.4626	A0A0H3BZR7	Mid-cell-anchored protein Z OS=Streptococcus pyogenes serotype M49 (strain NZ131) OX=471876 GN=mapZ PE=3 SV=1	SEESKEVEVTK	SEESKEVEVTK	[4] Phospho (STY)	40.77	5.59572	7	99.24	96.4271	---MSEESKEVEVTK	S	5					0											3461.67	7710.14	6254.49	4392.52	4070.08	3556.75	4228.39	6935.34	5944.52	4963.87	8743.57	6850.66	4473.04	5737.37	5042.77
441	542.6	3	1624.78	33.9395	0.558767	2.70083	A0A0H3C1S0	CsbD domain-containing protein OS=Streptococcus pyogenes serotype M49 (strain NZ131) OX=471876 GN=Spy49_1665c PE=3 SV=1	EGAGKLTGDKELEAK	EGAGKLTGDKELEAK	[7] Phospho (STY)	64.49	3.74039	3	100	100	KEGAGKLTGDKELEA	T	25	EGAGKLTGDKELEAK	[7] Phospho (STY)	7.3796	3.72591	5	KEGAGKLTGDKELEA	T	25	EGAGKLTGDKELEAK	[7] Phospho (STY)	34.0117	3.69694	KEGAGKLTGDKELEA	T	25	2565.48	4928.72	3907.16	2605.19	2526.96	2322.86	2547.42	3453.02	3554.48	4040.02	6821.49	6514.59	3274.11	3934.02	4115.01
457	983.937	2	1965.86	46.5573	1.23502	5.19391	A0A0H3BXI0	Uncharacterized protein OS=Streptococcus pyogenes serotype M49 (strain NZ131) OX=471876 GN=Spy49_1001c PE=3 SV=1	VTSAASSTSQFVSEQTEK	VTSAASSTSQFVSEQTEK	[9] Phospho (STY)	111.75	1.22173	20	96.57	71.7955	TSAASSTSQFVSEQT	S	137	VTSAASSTSQFVSEQTEK	[9] Phospho (STY)	8.5871	1.20976	23	TSAASSTSQFVSEQT	S	137	VTSAASSTSQFVSEQTEK	[9] Phospho (STY)	48.5142	1.19779	TSAASSTSQFVSEQT	S	137	2991.14	4780.71	3711.77	2837.34	2805.38	1801.48	3561.95	5682.13	3783.51	13745.6	19928.1	14916.1	5087.96	5477.63	4154.31
461	768.681	3	2303.02	64.0277	1.43205	4.29363	A0A0H3BYW2	EIICB-Lac OS=Streptococcus pyogenes serotype M49 (strain NZ131) OX=471876 GN=lacE PE=4 SV=1	VYDEQILAEEAAGTNSSDALK	VYDEQILAEEAAGTNSSDALK	[17] Phospho (STY)	68.51	-0.158955	13	80.13	46.8954	EAAGTNSSDALKEKV	S	428	VYDEQILAEEAAGTNSSDALK	[16] Phospho (STY)	7.0328	-0.169173	7	EEAAGTNSSDALKEK	S	427								6187.45	10897.6	9806.67	5795.87	4127.91	7717.48	2652.82	4914.58	6226.36	29963	42033.7	70924.5	8872.05	14747.1	18662.2
468	1090.48	3	3268.42	68.6928	1.7118	4.77839	A0A0H3BZ18	Cell-division initiation protein OS=Streptococcus pyogenes serotype M49 (strain NZ131) OX=471876 GN=divIVA PE=4 SV=1	ELEAYQLDSQSDSTTEPEVNLSETQTFK	ELEAYQLDSQSDSTTEPEVNLSETQTFK	[24] Phospho (STY)	114.89	0.666012	6	97.14	70.7	PEVNLSETQTFKLNI	T	245	ELEAYQLDSQSDSTTEPEVNLSETQTFK	[24] Phospho (STY)	7.77	0.658812	13	PEVNLSETQTFKLNI	T	245								12103.5	8683.08	8674.96	12428	9832.33	43148.1	4769.69	4111.17	18950.6	3285.33	4285.44	19746.2	116654	106367	309598
475	532.264	2	1062.51	36.1634	0.968533	2.77008	B5XKI1	Elongation factor Tu OS=Streptococcus pyogenes serotype M49 (strain NZ131) OX=471876 GN=tuf PE=3 SV=1	LPTSVNQPK	LPTSVNQPK	[4] Phospho (STY)	37.4	1.92483	8	93.53	86.3988	LARRLPTSVNQPKDY	S	43					0				LPTSVNQPK	[4] Phospho (STY)	51.3668	1.97465	LARRLPTSVNQPKDY	S	43	1649.23	3716.54	2741.15	1947.22	2138.9	2118.36	1244.61	2141.18	2083.4	7520.41	12417.3	11697.8	1849.29	2668.36	2414.53
488	531.57	3	1591.69	38.8845	0.57935	2.42382	B5XJR1	Elongation factor G OS=Streptococcus pyogenes serotype M49 (strain NZ131) OX=471876 GN=fusA PE=3 SV=1	VDGMEAHGNSQIVR	VDGMEAHGNSQIVR	[10] Phospho (STY)	85.27	5.08792	17	100	100	GMEAHGNSQIVRAYV	S	638	VDGMEAHGNSQIVR	[10] Phospho (STY)	7.7548	5.07314	16	GMEAHGNSQIVRAYV	S	638	VDGMEAHGNSQIVR	[10] Phospho (STY)	64.1261	5.16922	GMEAHGNSQIVRAYV	S	638	2791.87	995.828	3560.95	2601.9	2305.61	2415.12	3156.81	3737.9	4540.51	7687.08	11143.4	12144	5327.23	7382.91	7435.49
492	678.651	3	2032.93	59.8757	1.33678	2.90859	A0A0H3BYP4	Phosphoglucosamine mutase OS=Streptococcus pyogenes serotype M49 (strain NZ131) OX=471876 GN=glmM PE=3 SV=1	ASAGVMISASHNPALDNGIK	ASAGVMISASHNPALDNGIK	[10] Phospho (STY)|[17] Deamidation (N)	100.04	1.45342	31	98.6	56.9861	AGVMISASHNPALDN	S	100	ASAGVMISASHNPALDNGIK	[10] Phospho (STY)|[17] Deamidation (N)	6.4841	1.49103	7	AGVMISASHNPALDN	S	100	ASAGVMISASHNPALDNGIK	[10] Phospho (STY)|[17] Deamidation (N)	47.2232	1.51707	AGVMISASHNPALDN	S	100	10198.5	1953.86	8086.38	1791.69	873.934	992.498	14447.5	18535.5	17755.9	29744	40695.5	42421.4	19061	22998.4	22594.8
494	601.797	2	1201.58	45.991	0.6071	3.1856	B5XLJ8	L-lactate dehydrogenase OS=Streptococcus pyogenes serotype M49 (strain NZ131) OX=471876 GN=ldh PE=3 SV=1	DAAYSIINKK	DAAYSIINKK	[5] Phospho (STY)	42.59	3.47653	6	100	99.985	SVRDAAYSIINKKGA	S	225					0				DAAYSIINKK	[5] Phospho (STY)	78.5528	3.43736	SVRDAAYSIINKKGA	S	225	3082.22	7044.97	5113.83	4530.84	4324.69	3938.17	2655.8	3690.69	3390.97	9857.47	14125	12383	4629.12	5362.28	5391.28
504	768.681	3	2303.02	63.3258	1.49322	4.08587	A0A0H3BYW2	EIICB-Lac OS=Streptococcus pyogenes serotype M49 (strain NZ131) OX=471876 GN=lacE PE=4 SV=1	VYDEQILAEEAAGTNSSDALK	VYDEQILAEEAAGTNSSDALK	[17] Phospho (STY)	92.14	0.217801	4	49.66	42.115	EAAGTNSSDALKEKV	S	428	VYDEQILAEEAAGTNSSDALK	[17] Phospho (STY)	7.1298	0.207583	4	EAAGTNSSDALKEKV	S	428	VYDEQILAEEAAGTNSSDALK	[17] Phospho (STY)	57.4941	0.230567	EAAGTNSSDALKEKV	S	428	8813.15	15172.5	14417.2	3538.39	2881.14	4719.95	4680.2	6740.25	8441.29	29675.5	37865	61037.1	10626.8	14301.2	16649.4
511	580.245	2	1158.48	38.1825	0.68915	2.83934	A0A0H3BZ76	Putative phosphoprotein phosphatase (PppL protein) OS=Streptococcus pyogenes serotype M49 (strain NZ131) OX=471876 GN=pppL PE=4 SV=1	SNNQDFINK	SNNQDFINK	[1] Phospho (STY)	46.46	4.96008	5	100	100	TDIGQKRSNNQDFIN	S	14					0				SNNQDFINK	[1] Phospho (STY)	82.1648	4.91945	TDIGQKRSNNQDFIN	S	14	2182.58	3341.44	3253.25	3095.11	2824.23	2639.41	2056.28	3072.23	2683.17	11292.9	17000.4	16068.2	2605.95	3522.8	3138.52
516	854.393	3	2560.16	58.4644	0.64815	4.01662	A0A0H3BYW2	EIICB-Lac OS=Streptococcus pyogenes serotype M49 (strain NZ131) OX=471876 GN=lacE PE=4 SV=1	VYDEQILAEEAAGTNSSDALKEK	VYDEQILAEEAAGTNSSDALKEK	[17] Phospho (STY)	60.41	-0.00946472	7	33.33	33.3143	EAAGTNSSDALKEKV	S	428	VYDEQILAEEAAGTNSSDALKEK	[14] Phospho (STY)	6.6601	-0.0186568	10	LAEEAAGTNSSDALK	T	425	VYDEQILAEEAAGTNSSDALKEK	[16] Phospho (STY)	43.3188	0.00201919	EEAAGTNSSDALKEK	S	427	7309.92	13449.2	10385.4	2483.89	2322.9	2632.24	3706.08	5301.21	5350.11	21804.6	28746.9	33703.4	6832.48	8360.71	8706.94
519	672.801	2	1343.59	27.665	0.586483	3.4626	A0A0H3BZR7	Mid-cell-anchored protein Z OS=Streptococcus pyogenes serotype M49 (strain NZ131) OX=471876 GN=mapZ PE=3 SV=1	SEESKEVEVTK	SEESKEVEVTK	[1] Phospho (STY)	81.94	0.788658	11	99.95	96.2145	------MSEESKEVE	S	2					0											4505.41	9641.5	8267.32	4978.32	4795.88	3969.1	7802.67	12352.7	10094.1	4464.67	8104.44	6194.54	5757.47	6604.11	6416.12
526	754.654	3	2260.94	60.5162	4.78683	3.4626	A0A0H3BZ18	Cell-division initiation protein OS=Streptococcus pyogenes serotype M49 (strain NZ131) OX=471876 GN=divIVA PE=4 SV=1	TVLNEDIPESDDSASFDATR	TVLNEDIPESDDSASFDATR	[19] Phospho (STY)	77.67	0.755219	18	99.67	93.0017	DSASFDATRQFTPEE	T	201	TVLNEDIPESDDSASFDATR	[19] Phospho (STY)	8.1055	0.78904	20	DSASFDATRQFTPEE	T	201								19617.2	58114.5	63658.6	57826.3	47650.2	105367	31255.4	79824.1	112363	12291	27299	61060.9	18316.6	49795.3	70031.9
541	537.75	2	1073.48	50.6489	0.886267	2.70083	B5XLJ8	L-lactate dehydrogenase OS=Streptococcus pyogenes serotype M49 (strain NZ131) OX=471876 GN=ldh PE=3 SV=1	DAAYSIINK	DAAYSIINK	[5] Phospho (STY)	53.82	4.94792	10	100	99.946	SVRDAAYSIINKKGA	S	225					0				DAAYSIINK	[5] Phospho (STY)	64.4535	4.90407	SVRDAAYSIINKKGA	S	225	1943.22	3890.09	3054.23	1706.44	1604.66	1738.38	1588.95	2682.98	2544.1	11086	16492.7	15639.7	2032.13	2797.84	2825.95
549	498.746	2	995.478	30.1475	1.22723	2.70083	A0A0H3BY55	Non-specific serine/threonine protein kinase OS=Streptococcus pyogenes serotype M49 (strain NZ131) OX=471876 GN=Spy49_1257c PE=4 SV=1	VASGPTASVK	VASGPTASVK	[3] Phospho (STY)	70.43	9.4992	13	99.99	99.6546	KPLPKVASGPTASVK	S	299	VASGPTASVK	[3] Phospho (STY)	6.2688	9.57601	4	KPLPKVASGPTASVK	S	299								4692.88	8918.76	7574.34	6529.91	6078.47	6074.45	4860.96	8190.94	7630.03	5422.61	9822.03	9839.45	5498.25	8068.21	7784.71
558	569.276	3	1704.81	41.6534	0.402183	2.97784	A0A0H3BYA0	PTS system_ IIB component_ putative OS=Streptococcus pyogenes serotype M49 (strain NZ131) OX=471876 GN=Spy49_1328c PE=4 SV=1	ILAACGAGVNSSHQIK					0						ILAACGAGVNSSHQIK	[5] Carbamidomethyl (C)|[12] Phospho (STY)	7.7383	2.8649	2	CGAGVNSSHQIKDAI	S	15	ILAACGAGVNSSHQIK	[5] Carbamidomethyl (C)|[12] Phospho (STY)	63.694	2.95461	CGAGVNSSHQIKDAI	S	15	4984.36	6922.53	6334.77	2118.99	2232.43	2523.31	3261.97	5833.38	5608.37	16616	24911.8	25493.8	3957.53	5913.66	5153.65
568	628.971	3	1883.89	42.4577	0.750467	2.63158	A0A0H3BYW3	Uncharacterized protein OS=Streptococcus pyogenes serotype M49 (strain NZ131) OX=471876 GN=Spy49_0908 PE=4 SV=1	EKVEGIGEATSQTIQSK					0						EKVEGIGEATSQTIQSK	[10] Phospho (STY)	7.079	1.89049	4	VEGIGEATSQTIQSK	T	110	EKVEGIGEATSQTIQSK	[11] Phospho (STY)	51.4969	1.97167	EGIGEATSQTIQSKM	S	111	3623.07	5742.5	5198.43	4245.25	3852.14	3867.19	6315.25	8932.51	7827.19	11107.9	16444.9	16711.8	6935.64	9077.14	8585.16
575	502.71	2	1003.41	40.2346	0.824833	2.56233	B5XJ02	UPF0297 protein Spy49_1751c OS=Streptococcus pyogenes serotype M49 (strain NZ131) OX=471876 GN=Spy49_1751c PE=3 SV=1	GFTDETVR	GFTDETVR	[3] Phospho (STY)	38.84	4.36376	14	99.99	99.6979	----MGFTDETVRFK	T	4					0				GFTDETVR	[3] Phospho (STY)	83.0454	4.31685	----MGFTDETVRFK	T	4	3283.61	6690.13	5102.24	6947.93	6515.84	6101.27	6209.52	9151.75	8917.92	3245.76	5220.04	4660.08	3607.52	5047.95	4612.7
577	983.936	2	1965.86	45.1248	0.64815	5.19391	A0A0H3BXI0	Uncharacterized protein OS=Streptococcus pyogenes serotype M49 (strain NZ131) OX=471876 GN=Spy49_1001c PE=3 SV=1	VTSAASSTSQFVSEQTEK	VTSAASSTSQFVSEQTEK	[7] Phospho (STY)	82.66	0.496034	6	92.12	66.9033	RVTSAASSTSQFVSE	S	135	VTSAASSTSQFVSEQTEK	[7] Phospho (STY)	8.6169	0.484063	17	RVTSAASSTSQFVSE	S	135								2114.52	4009.11	2929.54	2642.05	2521.25	1449.54	2545.2	4414.51	3069.18	8953.84	15653	10087.2	4194.54	4285.3	3337.12
578	622.637	3	1864.89	51.3787	0.783883	2.97784	B5XJR0	30S ribosomal protein S7 OS=Streptococcus pyogenes serotype M49 (strain NZ131) OX=471876 GN=rpsG PE=3 SV=1	VGGSNYQVPVEVRPER	VGGSNYQVPVEVRPER	[4] Phospho (STY)	78.49	2.82273	8	100	99.9437	RARRVGGSNYQVPVE	S	83	VGGSNYQVPVEVRPER	[4] Phospho (STY)	7.7474	2.86374	11	RARRVGGSNYQVPVE	S	83	VGGSNYQVPVEVRPER	[4] Phospho (STY)	41.6484	2.89212	RARRVGGSNYQVPVE	S	83	2234.27	4006.86	3768.79	2428.49	2250.25	2408.28	2085.61	3053.44	2727.33	6226.13	10226.1	10524.3	2838.78	3781.62	3788.3
585	596.276	3	1785.81	39.9553	0.688867	2.77008	A0A0H3BXI0	Uncharacterized protein OS=Streptococcus pyogenes serotype M49 (strain NZ131) OX=471876 GN=Spy49_1001c PE=3 SV=1	LKDTISDTVNSDEAAK	LKDTISDTVNSDEAAK	[11] Phospho (STY)	58.87	1.79372	8	99.84	95.7525	TISDTVNSDEAAK--	S	157	LKDTISDTVNSDEAAK	[11] Phospho (STY)	8.3273	1.78054	21	TISDTVNSDEAAK--	S	157	LKDTISDTVNSDEAAK	[11] Phospho (STY)	84.2993	1.86618	TISDTVNSDEAAK--	S	157	2123.35	4158.27	3402.55	3383.9	3400.8	3565.55	2267.38	3988.04	3736.45	10207.3	14172.9	15702.2	3661.73	5506.76	5226.92
590	793.699	3	2378.07	44.9201	1.32998	3.67036	B5XI23	Protein translocase subunit SecA OS=Streptococcus pyogenes serotype M49 (strain NZ131) OX=471876 GN=secA PE=3 SV=1	ATTAAPQNIQSQQSANTDDLPK	ATTAAPQNIQSQQSANTDDLPK	[14] Phospho (STY)	54.68	-0.103903	10	96.43	78.596	QNIQSQQSANTDDLP	S	806	ATTAAPQNIQSQQSANTDDLPK	[14] Phospho (STY)	6.807	-0.113799	21	QNIQSQQSANTDDLP	S	806								15013.6	23422.6	22386.5	6809.94	6160.42	6473.08	10546.1	15543.3	15349.8	15517	23226.9	24731.6	19941.2	24749.6	24134.2
597	694.302	3	2079.88	47.0211	1.63742	3.11634	A0A0H3C1B5	Cell division protein SepF OS=Streptococcus pyogenes serotype M49 (strain NZ131) OX=471876 GN=sepF PE=3 SV=1	EQYQQSTCSDQTTIALK	EQYQQSTCSDQTTIALK	[7] Phospho (STY)|[8] Carbamidomethyl (C)	65.49	0.769567	25	89.37	63.7408	REQYQQSTCSDQTTI	T	121	EQYQQSTCSDQTTIALK	[7] Phospho (STY)|[8] Carbamidomethyl (C)	7.9426	0.758252	18	REQYQQSTCSDQTTI	T	121	EQYQQSTCSDQTTIALK	[6] Phospho (STY)|[8] Carbamidomethyl (C)	61.5723	0.735623	RREQYQQSTCSDQTT	S	120	20496.9	28927.1	27233.1	5272.31	4829.06	6090.52	16148.6	21537.8	21844.2	8178.47	11032	14412.3	22969.1	33321.8	35796.8
598	454.238	2	906.462	40.7801	0.648017	2.14681	A0A0H3BZC7	EIIAB-Man OS=Streptococcus pyogenes serotype M49 (strain NZ131) OX=471876 GN=manL PE=4 SV=1	ANVVPISK	ANVVPISK	[7] Phospho (STY)	40.3	4.35618	19	100	100	KANVVPISKLIEASK	S	230					0				ANVVPISK	[7] Phospho (STY)	92.012	4.30425	KANVVPISKLIEASK	S	230	3391.13	4828.42	4590.51	2865.77	3256.45	3326.44	2484.31	3341.29	3140.19	5888.75	8960.43	8699.62	2948.46	4290.27	4297.88
604	983.936	2	1965.86	43.931	0.70975	5.40166	A0A0H3BXI0	Uncharacterized protein OS=Streptococcus pyogenes serotype M49 (strain NZ131) OX=471876 GN=Spy49_1001c PE=3 SV=1	VTSAASSTSQFVSEQTEK	VTSAASSTSQFVSEQTEK	[13] Phospho (STY)	102.18	-0.114345	12	99.94	94.5133	SSTSQFVSEQTEKLK	S	141	VTSAASSTSQFVSEQTEK	[13] Phospho (STY)	8.5987	-0.126316	22	SSTSQFVSEQTEKLK	S	141	VTSAASSTSQFVSEQTEK	[13] Phospho (STY)	45.5881	-0.138287	SSTSQFVSEQTEKLK	S	141	1371.77	2240.98	1830.95	1760.03	1475.91	961.593	1993.42	2320.64	2052.54	15024.4	21597.4	17751.9	2386.19	2651.91	2001.22
606	512.233	2	1022.45	54.747	0.742917	2.63158	A0A0H3BZL9	PTS system_ fructose-specific IIABC component OS=Streptococcus pyogenes serotype M49 (strain NZ131) OX=471876 GN=fruA PE=4 SV=1	TSLGGAFYK	TSLGGAFYK	[2] Phospho (STY)	51.05	4.25805	15	95.67	79.5673	AVSTEKTSLGGAFYK	S	284					0				TSLGGAFYK	[2] Phospho (STY)	80.1616	4.21202	AVSTEKTSLGGAFYK	S	284	2396.92	4838.12	3880.14	2421.77	1476.73	2362.44	1669.16	3341.57	3182.54	6807.86	9858.74	9435.72	2742.89	3488.53	3739.74
613	530.723	2	1059.43	33.3118	0.750717	2.83934	A0A0H3C124	Putative mannose-specific phosphotransferase system component IID OS=Streptococcus pyogenes serotype M49 (strain NZ131) OX=471876 GN=manN PE=4 SV=1	LYTSPEDR	LYTSPEDR	[4] Phospho (STY)	45.46	4.12888	9	95.16	79.0644	ALKKLYTSPEDRATA	S	50					0				LYTSPEDR	[4] Phospho (STY)	69.4688	4.08445	ALKKLYTSPEDRATA	S	50	1661.76	3467.27	2949.86	2142.3	1940.1	2027.53	1451.82	2578.5	2702.61	6530.13	11219.8	11314.1	1853.28	2662.65	2526.9
622	874.44	3	2620.3	59.0844	0.484083	3.94737	A0A0H3BXH0	Endolytic murein transglycosylase OS=Streptococcus pyogenes serotype M49 (strain NZ131) OX=471876 GN=mltG PE=3 SV=1	VVQANELQETASKESQVPLTIEK	VVQANELQETASKESQVPLTIEK	[15] Phospho (STY)	31.67	-0.138475	4	32.98	32.5475	QETASKESQVPLTIE	S	127	VVQANELQETASKESQVPLTIEK	[12] Phospho (STY)	6.2651	-0.109292	6	NELQETASKESQVPL	S	124								8626.37	13737.1	10636.3	3464.2	3709.8	3790.91	7493.71	11915.1	10012.8	3887.6	6177.39	7272.13	7025.15	9958.75	9840.97
630	498.744	2	995.473	27.706	0.7094	2.42382	A0A0H3BY55	Non-specific serine/threonine protein kinase OS=Streptococcus pyogenes serotype M49 (strain NZ131) OX=471876 GN=Spy49_1257c PE=4 SV=1	VASGPTASVK	VASGPTASVK	[6] Phospho (STY)	55.02	3.85683	12	99.27	92.165	PKVASGPTASVKLSP	T	302	VASGPTASVK	[6] Phospho (STY)	6.3948	3.93365	6	PKVASGPTASVKLSP	T	302	VASGPTASVK	[6] Phospho (STY)	91.0069	3.91001	PKVASGPTASVKLSP	T	302	6231.04	12241.3	9546.02	3338.54	3483.66	3566	5604.07	7803.42	7118.4	2394.66	3912.19	3867.31	4388.23	5648.46	5606.9
634	667.932	3	2000.77	51.4401	0.893633	2.70083	A0A0H3BZC1	Uncharacterized protein OS=Streptococcus pyogenes serotype M49 (strain NZ131) OX=471876 GN=Spy49_0377 PE=4 SV=1	RMETFESDDAVDFDTK	RMETFESDDAVDFDTK	[2] Oxidation (M)|[15] Phospho (STY)	52.1	1.35797	10	100	99.732	DDAVDFDTKVMTLPE	T	30					0				RMETFESDDAVDFDTK	[2] Oxidation (M)|[15] Phospho (STY)	77.3551	1.32268	DDAVDFDTKVMTLPE	T	30	15545.9	48628.1	27480.2	13183.1	13063.3	17812.3	14940.2	26394.7	24189.5	3423.13	4738.38	6134.98	15697.2	18927.1	23044.8
638	740.306	2	1478.6	46.0115	0.8121	3.80886	B5XIW7	60 kDa chaperonin OS=Streptococcus pyogenes serotype M49 (strain NZ131) OX=471876 GN=groL PE=3 SV=1	SQLETTTSDFDR	SQLETTTSDFDR	[1] Phospho (STY)	75.18	2.78582	20	99.99	98.244	NRIALIKSQLETTTS	S	349	SQLETTTSDFDR	[1] Phospho (STY)	8.3282	2.7699	21	NRIALIKSQLETTTS	S	349	SQLETTTSDFDR	[1] Phospho (STY)	92.3785	2.75399	NRIALIKSQLETTTS	S	349	1638.57	3273.75	2783.49	2793.72	2540.17	2369.95	1799.88	3081.66	2650.59	9471.15	14522.3	13587.8	1960.54	2680.75	2640.24
643	620.778	2	1239.54	59.2687	0.886267	3.25485	B5XHZ0	Chaperone protein DnaK OS=Streptococcus pyogenes serotype M49 (strain NZ131) OX=471876 GN=dnaK PE=3 SV=1	DAAQSALDELK	DAAQSALDELK	[5] Phospho (STY)	69.06	2.41554	12	100	100	TERDAAQSALDELKA	S	537	DAAQSALDELK	[5] Phospho (STY)	8.2668	2.39656	12	TERDAAQSALDELKA	S	537								1598.58	3008.4	2543.86	2586.97	2174.54	2521.18	1251.82	2281.96	2003	10628.6	16381.1	17029	1775.87	2462.49	2429.73
660	709.34	2	1416.67	52.6671	0.627433	3.87812	A0A0H3C178	Putative putative C3-degrading proteinase OS=Streptococcus pyogenes serotype M49 (strain NZ131) OX=471876 GN=cppA PE=4 SV=1	HLQGTDLPSLEK					0						HLQGTDLPSLEK	[9] Phospho (STY)	5.8657	0.730849	8	LQGTDLPSLEKDATF	S	136								3646.83	7727.41	6087.91	5442.86	4695.75	4134.45	2598.76	5024.75	3860.35	3171.26	5243.51	4031.95	4670.89	6182.38	5223.17
664	986.188	4	3940.72	65.3649	1.21407	4.63989	A0A0H3BZ18	Cell-division initiation protein OS=Streptococcus pyogenes serotype M49 (strain NZ131) OX=471876 GN=divIVA PE=4 SV=1	VDESNKELEAYQLDSQSDSTTEPEVNLSETQTFK	VDESNKELEAYQLDSQSDSTTEPEVNLSETQTFK	[32] Phospho (STY)	103.67	-1.05351	3	47.24	38.7367	VNLSETQTFKLNI--	T	247	VDESNKELEAYQLDSQSDSTTEPEVNLSETQTFK	[30] Phospho (STY)	7.9526	-1.0341	9	PEVNLSETQTFKLNI	T	245								4244.09	1333.6	2282.45	3061.55	2541.42	21364.2	1272.3	643.926	5709.08	138.124	284.243	4853.4	39219.3	44655.5	163866
670	983.936	2	1965.86	50.3491	0.586467	5.19391	A0A0H3BXI0	Uncharacterized protein OS=Streptococcus pyogenes serotype M49 (strain NZ131) OX=471876 GN=Spy49_1001c PE=3 SV=1	VTSAASSTSQFVSEQTEK	VTSAASSTSQFVSEQTEK	[6] Phospho (STY)	95.33	0.574579	6	48.53	41.6011	DRVTSAASSTSQFVS	S	134	VTSAASSTSQFVSEQTEK	[6] Phospho (STY)	8.4653	0.562608	20	DRVTSAASSTSQFVS	S	134								2096.6	3926.23	2972.05	2171.14	2080.24	1340.97	2921.49	4784.1	3325.79	11250.1	15889.5	12076.1	4192.84	4372.02	3865.24
677	530.893	3	1589.66	35.1948	0.4843	2.07756	A0A0H3BZR7	Mid-cell-anchored protein Z OS=Streptococcus pyogenes serotype M49 (strain NZ131) OX=471876 GN=mapZ PE=3 SV=1	DQFLSEDSHHPAK	DQFLSEDSHHPAK	[8] Phospho (STY)	35.98	3.36087	2	98.37	94.345	DQFLSEDSHHPAKQN	S	167	DQFLSEDSHHPAK	[8] Phospho (STY)	7.4817	3.34607	7	DQFLSEDSHHPAKQN	S	167								4214.06	7065.52	5965.86	3373.26	3096.22	3113.27	4583.57	6740.41	6040	6050.5	10564.9	9232.77	4711.11	5449.94	4803.38
690	667.932	3	2000.77	52.265	2.1134	2.97784	A0A0H3BZC1	Uncharacterized protein OS=Streptococcus pyogenes serotype M49 (strain NZ131) OX=471876 GN=Spy49_0377 PE=4 SV=1	RMETFESDDAVDFDTK					0										0				RMETFESDDAVDFDTK	[2] Oxidation (M)|[4] Phospho (STY)	61.203	0.870289	EKARRMETFESDDAV	T	19	7613.39	21587.9	13338.6	6122.77	5770.5	8966.95	9627.27	14242.8	14993	2084.13	3454.72	4685.96	9948.95	12798.2	13898.5
693	551.753	2	1101.49	42.8601	0.784217	2.83934	B5XIW7	60 kDa chaperonin OS=Streptococcus pyogenes serotype M49 (strain NZ131) OX=471876 GN=groL PE=3 SV=1	DIKFSADAR	DIKFSADAR	[5] Phospho (STY)	39.46	5.40753	3	100	100	MAKDIKFSADARAAM	S	8					0				DIKFSADAR	[5] Phospho (STY)	82.0252	5.3648	MAKDIKFSADARAAM	S	8	1100.61	2284.83	1784.91	2449.28	2176.09	1938.55	1156.42	1903.67	1736.73	1817.13	2812.9	2621.27	1642.54	2097.7	1957.09
701	905.443	2	1808.87	48.4535	0.607167	4.9169	A0A0H3BZD6	Putative PTS system enzyme II OS=Streptococcus pyogenes serotype M49 (strain NZ131) OX=471876 GN=Spy49_1737c PE=4 SV=1	LPETPVSDAPVATAPHK	LPETPVSDAPVATAPHK	[7] Phospho (STY)	58.57	0.0811022	25	98.57	86.1192	KLPETPVSDAPVATA	S	507	LPETPVSDAPVATAPHK	[7] Phospho (STY)	5.6049	0.123376	3	KLPETPVSDAPVATA	S	507								2720.22	4768.9	3664.48	2817.29	2326.3	1533.38	1970.12	3660.41	2523.62	13245	20326.6	14783.3	3393.67	3969.22	2840.24
707	810.058	3	2427.15	52.0266	0.647917	4.43213	B5XIW7	60 kDa chaperonin OS=Streptococcus pyogenes serotype M49 (strain NZ131) OX=471876 GN=groL PE=3 SV=1	ITVDKDSTVIVEGSGSSEAIANR	ITVDKDSTVIVEGSGSSEAIANR	[16] Phospho (STY)	85.01	0.0994698	2	87.2	53.9213	VIVEGSGSSEAIANR	S	336	ITVDKDSTVIVEGSGSSEAIANR	[16] Phospho (STY)	8.0348	0.0897741	16	VIVEGSGSSEAIANR	S	336	ITVDKDSTVIVEGSGSSEAIANR	[17] Phospho (STY)	74.8773	0.0703825	IVEGSGSSEAIANRI	S	337	1465.76	2853.35	2293.7	2029.28	1919.21	2043.77	2186.32	3328.13	2691.71	10747.7	15922.8	17662	2098.52	2869.65	2682.66
718	429.211	3	1284.61	40.903	0.586583	2.28532	A0A0H3BZ43	Uncharacterized protein OS=Streptococcus pyogenes serotype M49 (strain NZ131) OX=471876 GN=Spy49_1003c PE=3 SV=1	NTSKDLTSAIR	NTSKDLTSAIR	[2] Phospho (STY)	71.83	3.80435	7	97.75	81.95	TETYIKNTSKDLTSA	T	9	NTSKDLTSAIR	[2] Phospho (STY)	7.3953	3.86387	5	TETYIKNTSKDLTSA	T	9	NTSKDLTSAIR	[3] Phospho (STY)	74.6497	3.74939	ETYIKNTSKDLTSAI	S	10	1311.09	2013.28	1982.99	1863.81	1773.1	2395.62	1491.23	2028.54	2132.47	5533.58	7302.02	9935.64	1655.03	2798.55	3060.76
719	983.936	2	1965.86	49.9674	0.463617	5.26316	A0A0H3BXI0	Uncharacterized protein OS=Streptococcus pyogenes serotype M49 (strain NZ131) OX=471876 GN=Spy49_1001c PE=3 SV=1	VTSAASSTSQFVSEQTEK	VTSAASSTSQFVSEQTEK	[3] Phospho (STY)	81.45	0.245858	15	59.64	52.1153	TVQDRVTSAASSTSQ	S	131	VTSAASSTSQFVSEQTEK	[2] Phospho (STY)	8.6148	0.233887	18	VTVQDRVTSAASSTS	T	130	VTSAASSTSQFVSEQTEK	[3] Phospho (STY)	72.0642	0.221916	TVQDRVTSAASSTSQ	S	131	2055.41	3183.6	2345.26	2193.05	1887.53	1376.01	1913.18	2930.17	2267.52	10571.7	15946.9	12233	3218.98	3015.23	2347.79
735	612.817	2	1223.62	45.6837	0.463767	3.3241	A0A0H3C2S7	Uncharacterized protein OS=Streptococcus pyogenes serotype M49 (strain NZ131) OX=471876 GN=Spy49_1801c PE=4 SV=1	TVGLDSKSPLK	TVGLDSKSPLK	[6] Phospho (STY)	31.42	2.71393	2	92.93	92.53	VKTVGLDSKSPLKTI	S	137	TVGLDSKSPLK	[6] Phospho (STY)	6.9383	2.77642	3	VKTVGLDSKSPLKTI	S	137	TVGLDSKSPLK	[6] Phospho (STY)	71.5086	2.75719	VKTVGLDSKSPLKTI	S	137	3804.11	7120.37	5316.68	4738.95	4375.49	4026.44	2340.18	3658.8	2584.3	1941.01	2906.84	2291.08	5477.58	6272.97	5559.06
745	1004.41	1	1003.4	38.0184	0.525333	8.51801	B5XJ02	UPF0297 protein Spy49_1751c OS=Streptococcus pyogenes serotype M49 (strain NZ131) OX=471876 GN=Spy49_1751c PE=3 SV=1	GFTDETVR	GFTDETVR	[6] Phospho (STY)	37.66	1.22003	15	99.86	98.2053	-MGFTDETVRFKLDD	T	7					0											1577.68	5065.32	4000.06	7177.86	7346.12	7115.3	1730.85	5333.39	5460.11	345.831	620.04	873.815	1311.49	1938.41	2647.94
749	599.299	2	1196.58	29.261	0.607117	3.11634	A0A0H3C1S0	CsbD domain-containing protein OS=Streptococcus pyogenes serotype M49 (strain NZ131) OX=471876 GN=Spy49_1665c PE=3 SV=1	SKIEQASGGLK	SKIEQASGGLK	[1] Phospho (STY)	62.17	1.92426	14	100	99.9571	MSEEKLKSKIEQASG	S	8	SKIEQASGGLK	[1] Phospho (STY)	7.2308	1.90459	5	MSEEKLKSKIEQASG	S	8	SKIEQASGGLK	[1] Phospho (STY)	65.2807	1.88492	MSEEKLKSKIEQASG	S	8	1474.53	2843.04	2523.11	1926.11	1803.87	1548.83	1125.44	1909.21	1768.35	2180.78	4248.77	3947.24	1520.08	2082.43	1678.63
754	626.804	2	1251.59	49.5243	0.709333	3.4626	A0A0H3BZ43	Uncharacterized protein OS=Streptococcus pyogenes serotype M49 (strain NZ131) OX=471876 GN=Spy49_1003c PE=3 SV=1	HVPTIYDSIK	HVPTIYDSIK	[8] Phospho (STY)	27.7	2.73217	2	99.73	99.415	HVPTIYDSIKSIVEE	S	96					0											1422.84	2658.39	2156.73	3015.98	2754.58	2301.34	1138.52	2009.46	1609.88	10661.9	15940.3	14770.7	1900	2526.99	2088.86
758	566.576	3	1696.71	43.3032	0.607117	2.77008	B5XI32	Elongation factor P OS=Streptococcus pyogenes serotype M49 (strain NZ131) OX=471876 GN=efp PE=3 SV=1	TGSTFDTTYRPDEK	TGSTFDTTYRPDEK	[3] Phospho (STY)	65.32	4.91045	7	92.47	72.9357	LRDVRTGSTFDTTYR	S	48	TGSTFDTTYRPDEK	[3] Phospho (STY)	7.1608	4.95552	4	LRDVRTGSTFDTTYR	S	48	TGSTFDTTYRPDEK	[3] Phospho (STY)	34.0097	4.98672	LRDVRTGSTFDTTYR	S	48	1770.79	3076.57	2635.31	2746.58	2394.55	2784.16	1631.95	2468.51	2192.86	10790.8	14604.5	15564.7	2015.98	2813.03	2584.34
765	1024.98	2	2047.94	53.397	0.688967	5.88643	A0A0H3BYP4	Phosphoglucosamine mutase OS=Streptococcus pyogenes serotype M49 (strain NZ131) OX=471876 GN=glmM PE=3 SV=1	ASAGVMISASHNPALDNGIK	ASAGVMISASHNPALDNGIK	[6] Oxidation (M)|[10] Phospho (STY)	144.11	0.390382	23	99.81	83.8452	AGVMISASHNPALDN	S	100					0											2662.91	13726.6	6354.25	450.347	512.658	364.474	3337.01	11378.5	7261.18	11034	19873.1	17354.9	4673.75	5915.72	4314.88
774	543.766	2	1085.52	55.0132	0.688867	2.83934	A0A0H3C2S7	Uncharacterized protein OS=Streptococcus pyogenes serotype M49 (strain NZ131) OX=471876 GN=Spy49_1801c PE=4 SV=1	TISPVSQFK	TISPVSQFK	[6] Phospho (STY)	29.37	2.11571	2	99.76	99.505	LKTISPVSQFKSNNR	S	148					0				TISPVSQFK	[6] Phospho (STY)	38.2955	2.07235	LKTISPVSQFKSNNR	S	148	4539.37	7913.42	7851.43	3749.61	4335.34	3739.88	3043.71	4860.49	4509.31	1492.92	2018.3	2088.55	8218	10271.2	10895.6
781	638.953	3	1913.84	56.9704	0.784333	2.63158	A0A0H3BZ95	UPF0371 protein Spy49_1067 OS=Streptococcus pyogenes serotype M49 (strain NZ131) OX=471876 GN=Spy49_1067 PE=3 SV=1	GYPTDINHIISSEGMGK	GYPTDINHIISSEGMGK	[12] Phospho (STY)|[15] Oxidation (M)	46.9	7.29188	2	86.76	72.305	DINHIISSEGMGKND	S	143					0											1477.35	6570.52	2427.57	2060.94	1353.93	2353.99	1392.12	2446.74	2217.8	10397.2	15397.4	18280.7	1537.23	2301.52	2605.55
782	693.838	2	1385.66	65.2214	0.7095	3.80886	B5XMJ7	Cell cycle protein GpsB OS=Streptococcus pyogenes serotype M49 (strain NZ131) OX=471876 GN=gpsB PE=3 SV=1	VAQSATNFDILK	VAQSATNFDILK	[4] Phospho (STY)	88.64	1.10996	20	99.93	96.7695	QPTRVAQSATNFDIL	S	84	VAQSATNFDILK	[4] Phospho (STY)	6.8375	1.16514	6	QPTRVAQSATNFDIL	S	84								4421.48	8503.51	7122.76	2661.51	2093.94	2249.07	2675.74	6105.43	5675.86	7774.88	14587.9	15231.6	4872	7433.63	6341.87
783	447.883	3	1340.63	42.0146	0.627433	1.93906	A0A0H3BZR7	Mid-cell-anchored protein Z OS=Streptococcus pyogenes serotype M49 (strain NZ131) OX=471876 GN=mapZ PE=3 SV=1	AGVTKDDSILDK	AGVTKDDSILDK	[4] Phospho (STY)	83.13	4.19398	21	100	96.2505	SEIKAGVTKDDSILD	T	42	AGVTKDDSILDK	[4] Phospho (STY)	7.874	4.25102	18	SEIKAGVTKDDSILD	T	42								5012.72	7912.41	7368.01	2603.36	2334.07	3228.47	5268.22	6768.45	7871.27	1218.46	1781.87	2441.92	6046.77	8294.27	9375.42
785	943.43	2	1884.85	59.9371	1.05008	5.19391	B5XJR1	Elongation factor G OS=Streptococcus pyogenes serotype M49 (strain NZ131) OX=471876 GN=fusA PE=3 SV=1	VYSGVLNSGSYVMNTSK	VYSGVLNSGSYVMNTSK	[10] Phospho (STY)	57.6	6.60404	3	96.9	95.7133	SGVLNSGSYVMNTSK	S	338	VYSGVLNSGSYVMNTSK	[8] Phospho (STY)	7.7617	6.64461	2	VYSGVLNSGSYVMNT	S	336	VYSGVLNSGSYVMNTSK	[10] Phospho (STY)	52.2925	6.63213	SGVLNSGSYVMNTSK	S	338	1999.88	900.809	3614.69	4804.56	3753.02	2358.34	1588.12	2893.65	2549.71	2764.69	4864.01	4219.62	3472.64	4039.9	3359.88
786	757.686	3	2270.04	70.5479	0.968467	4.08587	B5XKM7	Enolase OS=Streptococcus pyogenes serotype M49 (strain NZ131) OX=471876 GN=eno PE=3 SV=1	SGETEDSTIADIAVATNAGQIK	SGETEDSTIADIAVATNAGQIK	[1] Phospho (STY)	137.09	2.06177	4	72.85	54.1975	TAVVSHRSGETEDST	S	374	SGETEDSTIADIAVATNAGQIK	[1] Phospho (STY)	8.7966	2.0514	3	TAVVSHRSGETEDST	S	374	SGETEDSTIADIAVATNAGQIK	[1] Phospho (STY)	77.9442	2.11877	TAVVSHRSGETEDST	S	374	4.59052	186.007	96.9355	1545.27	383.473	911.465	118.016	295.408	359.298	272.77	732.341	1246.46	998.196	1701.77	2806.66
800	724.765	2	1447.52	27.6241	1.27542	3.60111	B5XKI2	Triosephosphate isomerase OS=Streptococcus pyogenes serotype M49 (strain NZ131) OX=471876 GN=tpiA PE=3 SV=1	SATQDDAQNMCK	SATQDDAQNMCK	[3] Phospho (STY)|[11] Carbamidomethyl (C)	78.49	3.00309	5	50	50	IGTGKSATQDDAQNM	T	180	SATQDDAQNMCK	[1] Phospho (STY)|[11] Carbamidomethyl (C)	8.3253	2.98683	15	WAIGTGKSATQDDAQ	S	178	SATQDDAQNMCK	[3] Phospho (STY)|[11] Carbamidomethyl (C)	75.0343	3.03966	IGTGKSATQDDAQNM	T	180	1251.34	1207.93	2664.16	1956.65	1775.98	1397.93	960.79	1913.15	1913.59	4716.76	8737.84	7692.45	1313.97	1692.32	1808.79
802	611.961	3	1832.86	45.9501	0.750667	2.97784	A0A0H3BY55	Non-specific serine/threonine protein kinase OS=Streptococcus pyogenes serotype M49 (strain NZ131) OX=471876 GN=Spy49_1257c PE=4 SV=1	YIQNHAPLSNNEVVR	YIQNHAPLSNNEVVR	[9] Phospho (STY)	50.58	2.34098	7	100	99.9671	IQNHAPLSNNEVVRI	S	109	YIQNHAPLSNNEVVR	[9] Phospho (STY)	6.2447	2.32814	9	IQNHAPLSNNEVVRI	S	109	YIQNHAPLSNNEVVR	[9] Phospho (STY)	70.0615	2.35702	IQNHAPLSNNEVVRI	S	109	2705.4	4884.09	3703.89	2656.57	2374.86	2357.73	2941.62	3823.41	3427.91	14519.6	19736.8	20241.9	2673.39	3426.5	3227.24
807	623.967	3	1868.88	31.1775	0.566167	2.83934	B5XJ47	50S ribosomal protein L24 OS=Streptococcus pyogenes serotype M49 (strain NZ131) OX=471876 GN=rplX PE=3 SV=1	HQKPNTENPQGAIVEK	HQKPNTENPQGAIVEK	[6] Phospho (STY)	76.78	1.20257	3	100	100	KKHQKPNTENPQGAI	T	49	HQKPNTENPQGAIVEK	[6] Phospho (STY)	8.1161	1.24349	7	KKHQKPNTENPQGAI	T	49	HQKPNTENPQGAIVEK	[6] Phospho (STY)	55.3955	1.16479	KKHQKPNTENPQGAI	T	49	1394.14	2629.63	2280.8	1464.84	1336.36	1275.9	932.741	1702.87	1498.89	2111.72	4088.34	3309.75	1767.8	2196.28	1938.48
808	899.921	2	1797.83	46.8161	0.784133	4.9169	B5XIY2	Histidine ammonia-lyase OS=Streptococcus pyogenes serotype M49 (strain NZ131) OX=471876 GN=hutH PE=3 SV=1	NLLEGSQNTTVATQSR	NLLEGSQNTTVATQSR	[15] Phospho (STY)	87.58	0.527955	3	98.44	82.0333	NTTVATQSRVQDPYT	S	274	NLLEGSQNTTVATQSR	[15] Phospho (STY)	7.721	0.514865	4	NTTVATQSRVQDPYT	S	274	NLLEGSQNTTVATQSR	[15] Phospho (STY)	56.3929	0.501775	NTTVATQSRVQDPYT	S	274	1210.91	2133.99	1503.25	1793.37	1632.51	1159.75	630.36	1137.45	841.134	32933.7	49170.6	36829.3	1143.02	1381.97	1152.01
837	633.618	3	1897.83	62.6574	0.701983	2.63158	A0A0H3BZ95	UPF0371 protein Spy49_1067 OS=Streptococcus pyogenes serotype M49 (strain NZ131) OX=471876 GN=Spy49_1067 PE=3 SV=1	GYPTDINHIISSEGMGK	GYPTDINHIISSEGMGK	[12] Phospho (STY)	37.72	2.11368	3	84.04	69.5767	DINHIISSEGMGKND	S	143					0											1689.65	361.247	2511.88	1870.75	1357.3	1786.2	1576.49	2609.54	2863.04	10548.1	16069.6	19606.4	2374.27	3553.98	3243.46
840	586.594	3	1756.76	44.4358	0.607217	3.3241	A0A0H3BYW2	EIICB-Lac OS=Streptococcus pyogenes serotype M49 (strain NZ131) OX=471876 GN=lacE PE=4 SV=1	EYGAPVTAAAGSYGAHR	EYGAPVTAAAGSYGAHR	[12] Phospho (STY)	45.61	1.92594	8	99.82	98.9537	PVTAAAGSYGAHREI	S	499	EYGAPVTAAAGSYGAHR	[12] Phospho (STY)	7.0527	1.91254	7	PVTAAAGSYGAHREI	S	499								3895.5	6452.07	5174.68	2232.91	1845.13	2013.48	2101.99	2727.27	2634.86	11658	15476.9	16508.8	4155	5358.09	5348.13
862	770.013	3	2307.02	44.9201	0.9072	4.15512	A0A0H3BZ23	Cell division protein FtsZ OS=Streptococcus pyogenes serotype M49 (strain NZ131) OX=471876 GN=ftsZ PE=3 SV=1	TFTQTNAQQVAGAQYASDQAK	TFTQTNAQQVAGAQYASDQAK	[17] Phospho (STY)	54.52	0.184312	10	100	98.277	VAGAQYASDQAKQSV	S	348	TFTQTNAQQVAGAQYASDQAK	[17] Phospho (STY)	7.6188	0.217457	17	VAGAQYASDQAKQSV	S	348	TFTQTNAQQVAGAQYASDQAK	[17] Phospho (STY)	67.0517	0.197056	VAGAQYASDQAKQSV	S	348	2134.62	3391.13	3174.24	1633.96	1462.17	1518.24	1719.1	2548.1	2442.08	8594.46	12239.4	13208.4	2344.06	3091.79	3021.97
870	770.013	3	2307.02	48.7328	1.0298	4.15512	A0A0H3BZ23	Cell division protein FtsZ OS=Streptococcus pyogenes serotype M49 (strain NZ131) OX=471876 GN=ftsZ PE=3 SV=1	TFTQTNAQQVAGAQYASDQAK	TFTQTNAQQVAGAQYASDQAK	[5] Phospho (STY)	41.26	0.0107491	13	36.97	34.1092	QPRTFTQTNAQQVAG	T	336	TFTQTNAQQVAGAQYASDQAK	[5] Phospho (STY)	7.8644	0.0438945	9	QPRTFTQTNAQQVAG	T	336	TFTQTNAQQVAGAQYASDQAK	[3] Phospho (STY)	73.2901	0.0234932	FRQPRTFTQTNAQQV	T	334	12314.6	20547.3	17928.6	5053.51	4303.26	4353.98	7109.07	10945.1	10325.2	3772.6	6207.74	6144.66	12420.3	16259.1	16573.1
874	683.983	3	2048.93	54.7674	0.348117	2.90859	A0A0H3BYP4	Phosphoglucosamine mutase OS=Streptococcus pyogenes serotype M49 (strain NZ131) OX=471876 GN=glmM PE=3 SV=1	ASAGVMISASHNPALDNGIK	ASAGVMISASHNPALDNGIK	[6] Oxidation (M)|[10] Phospho (STY)|[17] Deamidation (N)	85.13	1.53695	2	92.98	71.235	AGVMISASHNPALDN	S	100					0				ASAGVMISASHNPALDNGIK	[6] Oxidation (M)|[10] Phospho (STY)|[17] Deamidation (N)	35.5499	1.50249	AGVMISASHNPALDN	S	100	2520.24	8813.63	4284.59	858.78	797.309	862.547	4709.46	7487.09	7447.2	12878.5	16098.4	16868.3	5048.45	6562.68	6226.67
929	901.943	2	1801.87	44.797	0.743117	4.77839	B5XMJ7	Cell cycle protein GpsB OS=Streptococcus pyogenes serotype M49 (strain NZ131) OX=471876 GN=gpsB PE=3 SV=1	NTVSATVQQPVPQPTR	NTVSATVQQPVPQPTR	[2] Phospho (STY)	77.55	-1.05261	14	99.97	94.7243	AKYQARNTVSATVQQ	T	66	NTVSATVQQPVPQPTR	[2] Phospho (STY)	7.5348	-1.01018	9	AKYQARNTVSATVQQ	T	66	NTVSATVQQPVPQPTR	[2] Phospho (STY)	83.5233	-1.07873	AKYQARNTVSATVQQ	T	66	12759.3	22267.3	18244.9	3272.98	2905.24	1895.68	6070.18	10108.3	8132.22	2033.05	3717	2686.13	8497.28	9306.87	7998.89
935	703.999	3	2108.98	47.7642	0.5867	3.04709	B5XKP7	ATP synthase subunit b OS=Streptococcus pyogenes serotype M49 (strain NZ131) OX=471876 GN=atpF PE=3 SV=1	DIDQAEQSRLSAQQLEAK					0						DIDQAEQSRLSAQQLEAK	[11] Phospho (STY)	6.529	0.603935	5	QAEQSRLSAQQLEAK	S	58	DIDQAEQSRLSAQQLEAK	[11] Phospho (STY)	31.0508	0.581618	QAEQSRLSAQQLEAK	S	58	2818.74	4591.4	3684.67	1595.68	1393.84	1202.35	2090.04	3045.94	2868.21	11604.8	16380.4	15756.6	3424.85	3945.71	4116.73
939	469.738	4	1874.92	38.6256	1.07082	2.56233	B5XKI1	Elongation factor Tu OS=Streptococcus pyogenes serotype M49 (strain NZ131) OX=471876 GN=tuf PE=3 SV=1	SKPHVNIGTIGHVDHGK	SKPHVNIGTIGHVDHGK	[1] Phospho (STY)	68.6	3.53179	4	100	99.39	AKEKYDRSKPHVNIG	S	9	SKPHVNIGTIGHVDHGK	[1] Phospho (STY)	7.5778	3.57258	11	AKEKYDRSKPHVNIG	S	9								191.806	4170.4	4135.87	3955.9	3705.36	3946	1235.24	2390.84	2420.95	8332.4	13388.1	13607	3313.21	4512.12	3899.65
941	470.221	2	938.428	40.6982	0.9683	2.35457	B5XK64	Ribosome-recycling factor OS=Streptococcus pyogenes serotype M49 (strain NZ131) OX=471876 GN=frr PE=3 SV=1	ANASLLDR	ANASLLDR	[4] Phospho (STY)	46.75	6.3199	13	100	100	RAGRANASLLDRIQV	S	35					0				ANASLLDR	[4] Phospho (STY)	92.3124	6.26975	RAGRANASLLDRIQV	S	35	1087.12	1560.88	1432.23	1079.01	1060.88	1130.35	798.383	1110.49	1103.89	4822.15	7598.47	7298.49	1048.44	1504.64	1484.39
944	536.901	3	1607.68	31.1979	0.66855	2.49307	B5XJR1	Elongation factor G OS=Streptococcus pyogenes serotype M49 (strain NZ131) OX=471876 GN=fusA PE=3 SV=1	VDGMEAHGNSQIVR	VDGMEAHGNSQIVR	[4] Oxidation (M)|[10] Phospho (STY)	61.78	2.93646	6	100	100	GMEAHGNSQIVRAYV	S	638	VDGMEAHGNSQIVR	[4] Oxidation (M)|[10] Phospho (STY)	7.476	2.92182	4	GMEAHGNSQIVRAYV	S	638	VDGMEAHGNSQIVR	[4] Oxidation (M)|[10] Phospho (STY)	50.2066	2.89255	GMEAHGNSQIVRAYV	S	638	1546.75	7137.51	2910.67	1528.96	1696.75	2068.43	1561.66	3284.81	2631.16	4073.61	7715.64	7942.66	2505.66	3841.06	3580.9
963	656.294	3	1965.86	45.1248	0.709583	3.25485	A0A0H3BXI0	Uncharacterized protein OS=Streptococcus pyogenes serotype M49 (strain NZ131) OX=471876 GN=Spy49_1001c PE=3 SV=1	VTSAASSTSQFVSEQTEK	VTSAASSTSQFVSEQTEK	[7] Phospho (STY)	82.66	1.59062	6	92.12	66.9033	RVTSAASSTSQFVSE	S	135	VTSAASSTSQFVSEQTEK	[7] Phospho (STY)	8.6169	1.57865	17	RVTSAASSTSQFVSE	S	135								1407.3	1998.19	1991.89	707.269	842.214	1510.97	1875.16	2065.46	2826.37	4569.64	5728.91	10557.9	1983.92	3590.6	4347.48
969	1016.98	2	2031.94	58.1161	0.566467	6.16343	A0A0H3BYP4	Phosphoglucosamine mutase OS=Streptococcus pyogenes serotype M49 (strain NZ131) OX=471876 GN=glmM PE=3 SV=1	ASAGVMISASHNPALDNGIK	ASAGVMISASHNPALDNGIK	[10] Phospho (STY)	102.36	-0.0479201	25	99.76	76.7644	AGVMISASHNPALDN	S	100	ASAGVMISASHNPALDNGIK	[10] Phospho (STY)	6.8357	-0.0102878	11	AGVMISASHNPALDN	S	100								2729.87	465.804	2430.74	382.651	146.848	36.1219	3196.14	6187.65	3876.13	6026.73	11048.1	7442.07	4658.73	5928.13	5283.31
971	601.631	3	1801.87	44.8175	0.681683	2.90859	B5XMJ7	Cell cycle protein GpsB OS=Streptococcus pyogenes serotype M49 (strain NZ131) OX=471876 GN=gpsB PE=3 SV=1	NTVSATVQQPVPQPTR	NTVSATVQQPVPQPTR	[2] Phospho (STY)	77.55	-1.00835	14	99.97	94.7236	AKYQARNTVSATVQQ	T	66	NTVSATVQQPVPQPTR	[2] Phospho (STY)	7.5348	-0.965911	9	AKYQARNTVSATVQQ	T	66								9672.92	13868.3	13405.7	11130.1	12026.3	6403.84	5383.88	6670.69	8624.85	1806.42	2625.9	3986	6478.27	9626.56	11520.4
972	824.904	2	1647.79	77.5524	0.689033	4.63989	A0A0H3BZ23	Cell division protein FtsZ OS=Streptococcus pyogenes serotype M49 (strain NZ131) OX=471876 GN=ftsZ PE=3 SV=1	AFSFDTASIQGAIIK	AFSFDTASIQGAIIK	[6] Phospho (STY)	99.84	0.946881	12	99.89	97.16	-MAFSFDTASIQGAI	T	7	AFSFDTASIQGAIIK	[6] Phospho (STY)	7.9435	0.9326	14	-MAFSFDTASIQGAI	T	7	AFSFDTASIQGAIIK	[6] Phospho (STY)	68.9594	0.979006	-MAFSFDTASIQGAI	T	7	5055.34	13632.8	11673.2	3650.02	2608.17	3458.34	3750.6	5885.74	6724.64	1171.77	2454.19	2923.19	12850.6	15321.8	16410.4
985	487.213	2	972.411	37.1113	0.689033	2.49307	A0A0H3BZ23	Cell division protein FtsZ OS=Streptococcus pyogenes serotype M49 (strain NZ131) OX=471876 GN=ftsZ PE=3 SV=1	AEQVSGFR	AEQVSGFR	[5] Phospho (STY)	38.35	4.55922	11	100	100	QEKAEQVSGFRQPRT	S	325					0				AEQVSGFR	[5] Phospho (STY)	66.9608	4.51082	QEKAEQVSGFRQPRT	S	325	1170.04	2074.15	1724.72	1032.19	1070.69	1089.47	1173.9	1806.79	1808.88	3235.21	5191.74	5273.06	1272.55	1798.37	1738.24
986	546.279	3	1635.82	29.7248	0.791433	2.90859	B5XHV3	Translation initiation factor IF-2 OS=Streptococcus pyogenes serotype M49 (strain NZ131) OX=471876 GN=infB PE=3 SV=1	ASKPDVTASQTVKPK					0						ASKPDVTASQTVKPK	[2] Phospho (STY)	6.119	-4.22988	5	ISSFSKASKPDVTAS	S	54								2658.55	4891.81	3951.12	3316.02	3172.83	2748.93	1930.32	3004.73	2718.92	1913.54	3335.95	3110.3	2498.36	3298.68	3110.04
989	660.832	2	1319.65	74.5649	0.783967	3.60111	A0A0H3BZD9	Protein GrpE OS=Streptococcus pyogenes serotype M49 (strain NZ131) OX=471876 GN=grpE PE=3 SV=1	AILPSLDNLER	AILPSLDNLER	[5] Phospho (STY)	55.23	0.245359	4	100	100	LAKAILPSLDNLERA	S	99					0				AILPSLDNLER	[5] Phospho (STY)	83.0279	0.209693	LAKAILPSLDNLERA	S	99	69.3758	298.831	207.999	604.46	575.041	542.894	59.5915	155.009	148.824	9829.27	17222.7	20414.5	125.477	242.447	225.176
996	671.781	2	1341.55	45.8681	1.26835	3.53186	B5XJ60	30S ribosomal protein S13 OS=Streptococcus pyogenes serotype M49 (strain NZ131) OX=471876 GN=rpsM PE=3 SV=1	DLTSDQEDAIR	DLTSDQEDAIR	[4] Phospho (STY)	74.82	2.54389	14	98.35	88.4964	IRVKDLTSDQEDAIR	S	50	DLTSDQEDAIR	[4] Phospho (STY)	7.1193	2.52635	4	IRVKDLTSDQEDAIR	S	50								1509.79	3667.89	3056.96	2304.84	2122.25	2051.05	1333.8	2456.23	2124.26	4602.42	8149.24	7728.58	2443.19	3743.75	3186.19
1003	671.944	3	2012.81	50.1238	0.893633	2.97784	B5XJR1	Elongation factor G OS=Streptococcus pyogenes serotype M49 (strain NZ131) OX=471876 GN=fusA PE=3 SV=1	LYDGSYHDVDSSETAFK	LYDGSYHDVDSSETAFK	[14] Phospho (STY)	90.23	2.8565	3	99.01	55.7067	HDVDSSETAFKIAAS	T	578	LYDGSYHDVDSSETAFK	[14] Phospho (STY)	7.634	2.89449	3	HDVDSSETAFKIAAS	T	578	LYDGSYHDVDSSETAFK	[14] Phospho (STY)	45.6362	2.82143	HDVDSSETAFKIAAS	T	578	982.781	1548.24	1227.7	304.21	442.422	486.149	691.797	1011.58	966.569	1624.14	2559.15	2462.71	1219.43	1647.67	1498.28
1010	1314.58	3	3940.72	65.3649	0.94785	5.67867	A0A0H3BZ18	Cell-division initiation protein OS=Streptococcus pyogenes serotype M49 (strain NZ131) OX=471876 GN=divIVA PE=4 SV=1	VDESNKELEAYQLDSQSDSTTEPEVNLSETQTFK	VDESNKELEAYQLDSQSDSTTEPEVNLSETQTFK	[32] Phospho (STY)	103.67	-2.33058	3	47.24	38.74	VNLSETQTFKLNI--	T	247	VDESNKELEAYQLDSQSDSTTEPEVNLSETQTFK	[30] Phospho (STY)	7.9526	-2.31118	8	PEVNLSETQTFKLNI	T	245								3627.17	1453.98	1961.16	3363.43	2909.05	9327.43	990.563	703.42	3650.55	183.42	267.106	1999.86	50012.7	33190.6	90145.3
1016	442.712	2	883.409	43.1803	0.729983	2.14681	B5XMA2	UDP-N-acetylglucosamine--N-acetylmuramyl-(pentapeptide) pyrophosphoryl-undecaprenol N-acetylglucosamine transferase OS=Streptococcus pyogenes serotype M49 (strain NZ131) OX=471876 GN=murG PE=3 SV=1	ADISSAIK	ADISSAIK	[4] Phospho (STY)	56.59	4.4899	9	97.53	92.3856	DLLRADISSAIKEK-	S	354					0				ADISSAIK	[4] Phospho (STY)	55.669	4.43662	DLLRADISSAIKEK-	S	354	911.168	1579.07	1383.21	1920.42	1949.35	2300.75	1071.86	1724.84	1772.44	3562.27	5519.5	5894.67	1219.89	1648.73	1652.13
1045	543.256	3	1626.75	42.076	2.01875	2.63158	A0A0H3BYW3	Uncharacterized protein OS=Streptococcus pyogenes serotype M49 (strain NZ131) OX=471876 GN=Spy49_0908 PE=4 SV=1	VEGIGEATSQTIQSK	VEGIGEATSQTIQSK	[8] Phospho (STY)	62.3	-2.87323	14	97.7	92.545	VEGIGEATSQTIQSK	T	110	VEGIGEATSQTIQSK	[8] Phospho (STY)	7.022	-2.82623	4	VEGIGEATSQTIQSK	T	110								7805.05	12920.6	10864.2	8775.33	8460.97	8515.03	4374.43	6457.23	5893.47	2943.32	4726.58	4530.69	7312.23	9607.6	9063.99
1070	554.564	3	1660.67	36.9065	0.648067	2.63158	B5XJX2	UPF0154 protein Spy49_0296 OS=Streptococcus pyogenes serotype M49 (strain NZ131) OX=471876 GN=Spy49_0296 PE=3 SV=1	EMMSQMGQKPSEAK	EMMSQMGQKPSEAK	[11] Phospho (STY)	29.93	3.16696	4	99.85	99.6625	SQMGQKPSEAKIQQT	S	56					0											1672.6	321.691	1689.08	1244.25	1139.25	1069.95	1495.83	1354.88	1782.01	13240.3	17865.1	19160	2024.82	2681.4	2448.21
1072	969.419	2	1936.82	50.7308	0.3817	5.19391	A0A0H3BZL9	PTS system_ fructose-specific IIABC component OS=Streptococcus pyogenes serotype M49 (strain NZ131) OX=471876 GN=fruA PE=4 SV=1	EEQTSTGLGDGIAMPHSK	EEQTSTGLGDGIAMPHSK	[4] Phospho (STY)	91.36	0.100634	10	96.6	56.057	IMTREEQTSTGLGDG	T	55	EEQTSTGLGDGIAMPHSK	[4] Phospho (STY)	7.3738	0.140114	12	IMTREEQTSTGLGDG	T	55								2730.16	761.956	3464.82	775.996	471.097	419.09	1453.28	2643.44	2117.55	14254.3	21281.8	14342.7	4128.24	4433.29	3387.39
1078	881.899	2	1761.78	49.4014	0.783867	4.70914	A0A0H3BZ03	R3H domain protein OS=Streptococcus pyogenes serotype M49 (strain NZ131) OX=471876 GN=Spy49_0209 PE=4 SV=1	NAPAVNSADVEPEEIK	NAPAVNSADVEPEEIK	[7] Phospho (STY)	40.27	0.261507	3	100	100	KNAPAVNSADVEPEE	S	84	NAPAVNSADVEPEEIK	[7] Phospho (STY)	7.8109	0.24815	16	KNAPAVNSADVEPEE	S	84	NAPAVNSADVEPEEIK	[7] Phospho (STY)	53.6036	0.234792	KNAPAVNSADVEPEE	S	84	2361.01	4311.27	3550.24	2234.2	2061.45	1792.67	2058.81	3579.22	2856.73	7776.7	12090.6	10885.7	3349.1	4097.94	3754.86
1087	480.261	3	1437.76	39.9553	0.90675	2.42382	A0A0H3C1S0	CsbD domain-containing protein OS=Streptococcus pyogenes serotype M49 (strain NZ131) OX=471876 GN=Spy49_1665c PE=3 SV=1	LKSKIEQASGGLK	LKSKIEQASGGLK	[3] Phospho (STY)	79.56	1.92442	8	100	99.8988	MSEEKLKSKIEQASG	S	8	LKSKIEQASGGLK	[3] Phospho (STY)	7.5544	1.90806	7	MSEEKLKSKIEQASG	S	8	LKSKIEQASGGLK	[3] Phospho (STY)	50.2482	2.01443	MSEEKLKSKIEQASG	S	8	1239.52	2584.86	2011.9	1655.43	1615.14	1721.78	927.679	1562.29	1472.13	1366.66	2212.92	2327.58	2534.44	3880.92	3595.87
1098	839.065	3	2514.17	48.1666	0.463817	3.67036	A0A0H3BZR7	Mid-cell-anchored protein Z OS=Streptococcus pyogenes serotype M49 (strain NZ131) OX=471876 GN=mapZ PE=3 SV=1	SEESKEVEVTKESQTLGLNEAK	SEESKEVEVTKESQTLGLNEAK	[10] Phospho (STY)	70.9	0.337489	5	99.38	97.452	ESKEVEVTKESQTLG	T	11					0											6342.71	10598.2	8796.08	1712.73	1614.07	1209.88	6003.24	8827.84	7149.45	713.063	1285.87	986.258	7344.21	9411.01	7807.55
1109	638.316	3	1911.93	64.5734	0.5458	3.1856	A0A0H3BXH0	Endolytic murein transglycosylase OS=Streptococcus pyogenes serotype M49 (strain NZ131) OX=471876 GN=mltG PE=3 SV=1	DAVMTSEALKPTLLSEK					0						DAVMTSEALKPTLLSEK	[5] Phospho (STY)	5.9592	0.106342	5	AIKDAVMTSEALKPT	T	89								6771.01	1387.69	8822.92	2655.06	2406.6	2120.25	5997.51	7969.19	9017.27	528.894	1291.51	1443.12	6949.84	9590.61	9651.24
1112	796.849	2	1591.68	38.905	0.40955	4.15512	B5XJR1	Elongation factor G OS=Streptococcus pyogenes serotype M49 (strain NZ131) OX=471876 GN=fusA PE=3 SV=1	VDGMEAHGNSQIVR	VDGMEAHGNSQIVR	[10] Phospho (STY)	85.27	1.11826	15	100	100	GMEAHGNSQIVRAYV	S	638	VDGMEAHGNSQIVR	[10] Phospho (STY)	7.7548	1.10348	16	GMEAHGNSQIVRAYV	S	638								837.384	91.4971	1082.78	795.321	645.23	342.984	755.454	1271.39	1180.38	2994.79	5465.81	3873.34	2034.9	2237.19	1995.35
1135	596.276	3	1785.81	43.0444	0.709667	2.77008	A0A0H3BXI0	Uncharacterized protein OS=Streptococcus pyogenes serotype M49 (strain NZ131) OX=471876 GN=Spy49_1001c PE=3 SV=1	LKDTISDTVNSDEAAK	LKDTISDTVNSDEAAK	[6] Phospho (STY)	68.03	2.33823	2	92.16	89.205	EKLKDTISDTVNSDE	S	152	LKDTISDTVNSDEAAK	[8] Phospho (STY)	8.0992	2.32505	4	LKDTISDTVNSDEAA	T	154	LKDTISDTVNSDEAAK	[6] Phospho (STY)	65.195	2.41069	EKLKDTISDTVNSDE	S	152	3472.84	3678.91	3863.58	3079.67	2952.38	2891.29	2889.51	3747.95	3716.95	5598.4	7497.11	8814.02	3491.34	4168.25	4314.13
1138	652.639	3	1954.89	52.1626	1.16558	3.04709	A0A0H3BZL9	PTS system_ fructose-specific IIABC component OS=Streptococcus pyogenes serotype M49 (strain NZ131) OX=471876 GN=fruA PE=4 SV=1	SETAVSTEKTSLGGAFYK					0						SETAVSTEKTSLGGAFYK	[10] Phospho (STY)	5.5463	1.24955	4	TAVSTEKTSLGGAFY	T	283	SETAVSTEKTSLGGAFYK	[10] Phospho (STY)	38.6004	1.22548	TAVSTEKTSLGGAFY	T	283	4029.11	5333.35	5456.4	2942.17	2315.48	2600.77	2019.49	3595.2	3001.09	3198.64	5098.36	5224.53	3694.42	5556	5134.09
1157	770.873	2	1539.73	71.7212	0.689167	4.15512	A0A0H3C228	L-serine dehydratase OS=Streptococcus pyogenes serotype M49 (strain NZ131) OX=471876 GN=sdhA PE=3 SV=1	GNSLSDTTILNAVR	GNSLSDTTILNAVR	[7] Phospho (STY)	96.04	0.733514	18	97.51	86.9689	KGNSLSDTTILNAVR	T	88					0											1058.61	5166.06	4193.79	2820.98	1836.34	2333.29	1732.89	3659.45	3552.76	3867.37	6754.71	6158.45	4591.47	6171.95	5266.87
1167	499.242	2	996.469	32.8275	0.866183	2.63158	A0A0H3BZ43	Uncharacterized protein OS=Streptococcus pyogenes serotype M49 (strain NZ131) OX=471876 GN=Spy49_1003c PE=3 SV=1	LVNTESVR	LVNTESVR	[6] Phospho (STY)	80.75	4.93424	5	98.06	84.754	DKLVNTESVRDGVNV	S	62					0				LVNTESVR	[4] Phospho (STY)	81.6642	4.98737	LKDKLVNTESVRDGV	T	60	1345.84	2801.32	2305.04	2154.65	2200.21	2356.55	1421.42	2295	2221.61	1663.02	3014.49	3298.39	1651.58	2224.56	2325.66
1181	954.929	2	1907.84	51.4401	0.586467	4.9169	A0A0H3C0G3	Uncharacterized protein OS=Streptococcus pyogenes serotype M49 (strain NZ131) OX=471876 GN=Spy49_1599c PE=4 SV=1	AGSHPQTSQINVGEFEK	AGSHPQTSQINVGEFEK	[7] Phospho (STY)	52.33	1.45973	4	55.06	48.3192	KAGSHPQTSQINVGE	T	67	AGSHPQTSQINVGEFEK	[8] Phospho (STY)	7.3753	1.49981	19	AGSHPQTSQINVGEF	S	68	AGSHPQTSQINVGEFEK	[8] Phospho (STY)	44.9838	1.52756	AGSHPQTSQINVGEF	S	68	1341.58	2774.04	1916.49	1455.07	1481.07	975.605	722.36	1432.13	1004.49	14990.8	24722.7	17882.9	2013.01	2138.03	1606.75
1188	509.699	2	1017.38	33.3528	0.825267	2.35457	A0A0H3BYC1	DNA-directed RNA polymerase subunit alpha OS=Streptococcus pyogenes serotype M49 (strain NZ131) OX=471876 GN=rpoA PE=3 SV=1	VGSNDGFDK	VGSNDGFDK	[3] Phospho (STY)	33.08	3.64304	2	100	100	VEPARVGSNDGFDKL	S	185	VGSNDGFDK	[3] Phospho (STY)	6.0996	3.7182	2	VEPARVGSNDGFDKL	S	185	VGSNDGFDK	[3] Phospho (STY)	81.7606	3.69507	VEPARVGSNDGFDKL	S	185	734.535	1533.85	1353.03	392.768	421.406	363.897	657.798	1177.18	1142.78	5058.61	8423.84	8462.42	852.975	1160.68	1122.57
1225	476.892	3	1427.65	46.8161	0.525283	2.28532	A0A0H3BZ43	Uncharacterized protein OS=Streptococcus pyogenes serotype M49 (strain NZ131) OX=471876 GN=Spy49_1003c PE=3 SV=1	VSLQDKVSDMAR	VSLQDKVSDMAR	[8] Phospho (STY)	58.94	3.95288	8	100	99.9813	VSLQDKVSDMARSTF	S	141	VSLQDKVSDMAR	[8] Phospho (STY)	7.456	4.00644	6	VSLQDKVSDMARSTF	S	141								1047.36	282.964	1181.26	1075.59	868.327	1187.32	1126.91	1360.32	1601.97	4628.38	6907.32	8153.6	1603.87	2419.5	2439.91
1235	1136.02	2	2270.03	70.5479	0.80465	6.5097	B5XKM7	Enolase OS=Streptococcus pyogenes serotype M49 (strain NZ131) OX=471876 GN=eno PE=3 SV=1	SGETEDSTIADIAVATNAGQIK	SGETEDSTIADIAVATNAGQIK	[1] Phospho (STY)	137.09	0.671299	4	72.85	53.5325	TAVVSHRSGETEDST	S	374	SGETEDSTIADIAVATNAGQIK	[1] Phospho (STY)	8.7966	0.660932	3	TAVVSHRSGETEDST	S	374	SGETEDSTIADIAVATNAGQIK	[1] Phospho (STY)	87.8559	0.728303	TAVVSHRSGETEDST	S	374	0	23.7219	0	17.2238	4.15907	0	0	4.1687	3.27086	54.658	234.187	106.638	335.686	307.105	355.302
1241	477.24	2	952.465	40.6982	0.968283	2.49307	B5XJ55	50S ribosomal protein L15 OS=Streptococcus pyogenes serotype M49 (strain NZ131) OX=471876 GN=rplO PE=3 SV=1	SAEAAIIAK	SAEAAIIAK	[1] Phospho (STY)	87.27	1.96693	5	100	100	KAAKFSKSAEAAIIA	S	131					0				SAEAAIIAK	[1] Phospho (STY)	91.4095	1.91752	KAAKFSKSAEAAIIA	S	131	1112.45	1691.32	1441.99	3543.28	3536.05	3683.4	1032.29	1336.18	1271.09	3028.17	4889.77	4555.89	1263.9	1766.27	1807.2
1252	657.797	2	1313.58	47.5873	0.8457	3.4626	A0A0H3BYE4	Signal recognition particle protein OS=Streptococcus pyogenes serotype M49 (strain NZ131) OX=471876 GN=ffh PE=3 SV=1	LSESDVQEVTK	LSESDVQEVTK	[4] Phospho (STY)	117.28	2.61936	10	99.99	95.469	GKKKLSESDVQEVTK	S	26	LSESDVQEVTK	[4] Phospho (STY)	6.4748	2.67758	3	GKKKLSESDVQEVTK	S	26	LSESDVQEVTK	[4] Phospho (STY)	68.391	2.58353	GKKKLSESDVQEVTK	S	26	930.972	2171.69	1907.27	1483.11	1566.56	1472.72	1222.46	1953.37	1871.9	3835.72	5850.81	5657.1	1457.69	2332.32	2255.79
1271	482.223	3	1443.65	36.5042	0.7228	2.21607	A0A0H3BZ43	Uncharacterized protein OS=Streptococcus pyogenes serotype M49 (strain NZ131) OX=471876 GN=Spy49_1003c PE=3 SV=1	VSLQDKVSDMAR	VSLQDKVSDMAR	[8] Phospho (STY)|[10] Oxidation (M)	45.45	3.02849	7	99.97	99.9443	VSLQDKVSDMARSTF	S	141	VSLQDKVSDMAR	[8] Phospho (STY)|[10] Oxidation (M)	7.2401	3.08146	2	VSLQDKVSDMARSTF	S	141	VSLQDKVSDMAR	[8] Phospho (STY)|[10] Oxidation (M)	41.0193	2.97959	VSLQDKVSDMARSTF	S	141	844.538	4379.63	1850.99	1455.28	1669.41	1749.69	968.483	1646.75	1595.75	4054.3	6407.36	6985.69	998.576	1567.84	1639.65
1280	525.755	2	1049.5	50.3696	0.98865	2.83934	A0A0H3C114	Inosine-5'-monophosphate dehydrogenase OS=Streptococcus pyogenes serotype M49 (strain NZ131) OX=471876 GN=guaB PE=3 SV=1	LPLVDNSGR	LPLVDNSGR	[7] Phospho (STY)	37.84	5.32308	5	100	100	KLPLVDNSGRLSGLI	S	194					0											1727.41	2157.64	1985.62	1198.84	1510.15	1814.65	1345.26	1711.25	1728.6	6276.78	8539.95	8403.66	2161.2	2642.33	2799.34
1284	628.301	2	1254.59	38.4004	0.348117	3.60111	A0A0H3BY05	Carbamate kinase OS=Streptococcus pyogenes serotype M49 (strain NZ131) OX=471876 GN=arcC PE=3 SV=1	AQQEALISTSK	AQQEALISTSK	[10] Phospho (STY)	55.18	1.34503	5	33.33	33.33	QEALISTSKSLVKLI	S	33	AQQEALISTSK	[8] Phospho (STY)	7.4871	1.40598	3	AQQEALISTSKSLVK	S	31								759.403	1684.39	1407.2	1133.77	1106.47	927.56	757.25	943.2	1024.71	8302.97	13525.9	12265.3	1066.03	1471.57	1202.77
1300	570.938	3	1709.79	41.7689	0.545517	2.49307	A0A0H3BXD5	30S ribosomal protein S12 OS=Streptococcus pyogenes serotype M49 (strain NZ131) OX=471876 GN=rpsL PE=3 SV=1	SDSPALNIGYNSHKK	SDSPALNIGYNSHKK	[12] Phospho (STY)	61	9.47071	2	100	99.885	ALNIGYNSHKKVQTK	S	48					0											1698.01	2734.12	2077.32	1183.74	1062.48	1154.22	549.693	1397.28	1142.5	1025.08	1743.86	1479.53	1518	1795.07	1803.46
1306	622.288	2	1242.56	51.2558	1.07057	3.25485	A0A0H3BY05	Carbamate kinase OS=Streptococcus pyogenes serotype M49 (strain NZ131) OX=471876 GN=arcC PE=3 SV=1	LEEVTVSQMK	LEEVTVSQMK	[7] Phospho (STY)	45.39	3.28937	6	99.02	88.665	KLEEVTVSQMKEYIT	S	258	LEEVTVSQMK	[7] Phospho (STY)	7.1789	3.27043	3	KLEEVTVSQMKEYIT	S	258	LEEVTVSQMK	[7] Phospho (STY)	86.1245	3.33197	KLEEVTVSQMKEYIT	S	258	1326.3	796.905	1770.88	1465.73	1329.18	1274.04	821.086	1377.77	1378.72	8114.56	12972.8	12119.6	1634.55	2550.34	2240.34
1310	579.586	3	1735.74	43.631	0.64805	2.56233	B5XIW7	60 kDa chaperonin OS=Streptococcus pyogenes serotype M49 (strain NZ131) OX=471876 GN=groL PE=3 SV=1	SQLETTTSDFDREK					0						SQLETTTSDFDREK	[8] Phospho (STY)	7.7677	3.71194	6	SQLETTTSDFDREKL	S	356								717.992	1183.16	1113.49	1319.78	1397.23	1379.8	1015.23	1428.54	1314.91	4124.33	6171.39	6221.35	881.521	1061.34	1043.28
1317	656.296	3	1965.87	50.3901	0.566	3.1856	A0A0H3BXI0	Uncharacterized protein OS=Streptococcus pyogenes serotype M49 (strain NZ131) OX=471876 GN=Spy49_1001c PE=3 SV=1	VTSAASSTSQFVSEQTEK	VTSAASSTSQFVSEQTEK	[6] Phospho (STY)	95.33	4.59737	6	48.53	41.66	DRVTSAASSTSQFVS	S	134	VTSAASSTSQFVSEQTEK	[6] Phospho (STY)	8.4653	4.5854	20	DRVTSAASSTSQFVS	S	134								1262.91	1934.51	1991.8	1188.76	1430.7	2294.72	1795.39	1937.96	3015.47	4211.99	4787.41	10688.5	2268.94	4169.31	5281.17
1320	476.218	2	950.421	46.9187	0.743167	2.63158	A0A0H3BYM9	Glyceraldehyde-3-phosphate dehydrogenase OS=Streptococcus pyogenes serotype M49 (strain NZ131) OX=471876 GN=plr PE=3 SV=1	TLEYFAK	TLEYFAK	[4] Phospho (STY)	26.19	6.34413	2	99.81	99.79	QLVRTLEYFAKIAK-	Y	330					0											471.983	997.028	746.784	653.132	648.426	827.65	389.961	699.73	643.029	3227.63	4917.74	5040.48	526.002	904.287	881.818
1325	849.352	2	1696.69	43.3032	1.91622	4.43213	B5XI32	Elongation factor P OS=Streptococcus pyogenes serotype M49 (strain NZ131) OX=471876 GN=efp PE=3 SV=1	TGSTFDTTYRPDEK	TGSTFDTTYRPDEK	[3] Phospho (STY)	68.84	-5.34193	6	92.47	76.0283	LRDVRTGSTFDTTYR	S	48	TGSTFDTTYRPDEK	[3] Phospho (STY)	7.1608	-5.29686	4	LRDVRTGSTFDTTYR	S	48	TGSTFDTTYRPDEK	[3] Phospho (STY)	57.612	-5.26567	LRDVRTGSTFDTTYR	S	48	1151.05	2449	2165.56	2134.62	1803.84	1283.12	5521.44	9633.07	8282.8	7923.91	13710.9	10479	1067.36	1336.58	1175.66
1334	760.351	3	2278.03	61.4844	0.586483	3.87812	A0A0H3BZC7	EIIAB-Man OS=Streptococcus pyogenes serotype M49 (strain NZ131) OX=471876 GN=manL PE=4 SV=1	AVEGGVEINELNVGSMAHSTGK	AVEGGVEINELNVGSMAHSTGK	[20] Phospho (STY)	28.99	0.33392	2	42.6	39.495	VGSMAHSTGKTMVNN	T	278	AVEGGVEINELNVGSMAHSTGK	[19] Phospho (STY)	7.6178	0.367487	4	NVGSMAHSTGKTMVN	S	277								1649.35	177.296	1964.89	1444.27	808.936	816.325	1202.94	2304.79	2274.87	4390.38	6379.96	7168.98	4497.92	6327.17	6062.97
1337	740.358	2	1478.7	44.797	0.640717	3.94737	A0A0H3BZ03	R3H domain protein OS=Streptococcus pyogenes serotype M49 (strain NZ131) OX=471876 GN=Spy49_0209 PE=4 SV=1	KPAQVDIEGISDK	KPAQVDIEGISDK	[11] Phospho (STY)	86.38	-0.539982	6	100	100	QVDIEGISDKTVYKA	S	55	KPAQVDIEGISDK	[11] Phospho (STY)	7.3739	-0.48827	5	QVDIEGISDKTVYKA	S	55	KPAQVDIEGISDK	[11] Phospho (STY)	29.8231	-0.571812	QVDIEGISDKTVYKA	S	55	1078.75	2393.7	1758.34	2239.53	2321.47	1797.48	1162.88	2155.54	1699.46	5128.8	8520.91	6980	1245.99	1675.33	1389.05
1362	748.853	2	1495.69	36.1018	0.743133	4.01662	A0A0H3BXH0	Endolytic murein transglycosylase OS=Streptococcus pyogenes serotype M49 (strain NZ131) OX=471876 GN=mltG PE=3 SV=1	VVQANELQETASK	VVQANELQETASK	[10] Phospho (STY)	47.03	-0.119973	6	98.29	79.3767	QANELQETASKESQV	T	122	VVQANELQETASK	[10] Phospho (STY)	6.3292	-0.135707	5	QANELQETASKESQV	T	122								3345.58	6263.22	5242.98	1241.18	1202.58	1078.03	3235.54	5097.27	4748.2	1005.39	1999.1	1760.06	3477.06	4887.92	4563.06
1372	414.189	3	1239.54	28.313	0.668617	2.00831	B5XK64	Ribosome-recycling factor OS=Streptococcus pyogenes serotype M49 (strain NZ131) OX=471876 GN=frr PE=3 SV=1	FAQSHQSLSR	FAQSHQSLSR	[7] Phospho (STY)	52.06	3.81476	7	98.71	96.5557	RFAQSHQSLSREYAS	S	19	FAQSHQSLSR	[7] Phospho (STY)	6.5696	3.79577	5	RFAQSHQSLSREYAS	S	19	FAQSHQSLSR	[9] Phospho (STY)	56.3573	3.7578	AQSHQSLSREYASIR	S	21	512.734	947.339	824.999	630.12	647.826	851.525	461.104	635.928	706.206	3009.87	4786.43	6416.43	591.096	952.795	908.079
1401	471.222	2	940.43	29.1791	0.866017	2.42382	B5XHZ0	Chaperone protein DnaK OS=Streptococcus pyogenes serotype M49 (strain NZ131) OX=471876 GN=dnaK PE=3 SV=1	NTTIPTSK	NTTIPTSK	[3] Phospho (STY)	39.46	3.29954	2	91.14	84.205	KLIDRNTTIPTSKSQ	T	387					0											744.293	1747.67	1615.98	2654.5	2125.98	2464.11	810.764	1327.19	1252.26	2715.56	4770.41	4870.73	802.359	1542.91	1398.57
1406	557.244	2	1112.47	37.8136	0.94815	2.77008	A0A0H3BZ23	Cell division protein FtsZ OS=Streptococcus pyogenes serotype M49 (strain NZ131) OX=471876 GN=ftsZ PE=3 SV=1	QSVQPGFDR	QSVQPGFDR	[2] Phospho (STY)	33.25	6.83911	2	100	100	ASDQAKQSVQPGFDR	S	354					0											1166.97	2407.63	1684.49	661.325	655.196	655.235	1971.65	3002.6	2826.23	2826.99	4487	4346.5	1286.08	1651.41	1517.15
1414	746.376	2	1490.74	56.3426	0.607167	3.94737	A0A0H3BWJ5	Transcription termination/antitermination protein NusG OS=Streptococcus pyogenes serotype M49 (strain NZ131) OX=471876 GN=nusG PE=3 SV=1	SKPTPLLEEEIR	SKPTPLLEEEIR	[1] Phospho (STY)	60.98	-0.348516	6	99.42	95.54	VGSHGNRSKPTPLLE	S	105	SKPTPLLEEEIR	[1] Phospho (STY)	7.0692	-0.364302	7	VGSHGNRSKPTPLLE	S	105								720.943	1090.45	894.55	2258.23	2212.77	1738.71	515.151	829.958	667.045	2473.3	4154.7	2810.89	710.988	1181.1	947.227
1422	448.874	3	1343.6	29.1177	0.5048	2.21607	A0A0H3BZR7	Mid-cell-anchored protein Z OS=Streptococcus pyogenes serotype M49 (strain NZ131) OX=471876 GN=mapZ PE=3 SV=1	SEESKEVEVTK	SEESKEVEVTK	[4] Phospho (STY)	40.75	10.3318	7	99.24	96.4271	---MSEESKEVEVTK	S	5					0											911.836	1797.73	1681.79	872.971	864.897	1233.27	1126.98	1395.02	1699.28	1139.97	2201.28	2899.35	904.273	1681.44	1947.18
1425	711.851	2	1421.69	42.737	0.70215	3.80886	A0A0H3BXY9	Isoleucine--tRNA ligase OS=Streptococcus pyogenes serotype M49 (strain NZ131) OX=471876 GN=ileS PE=3 SV=1	SKGNIISPNDVAK	SKGNIISPNDVAK	[1] Phospho (STY)	53.29	-2.64787	3	100	99.9933	KGEKMSKSKGNIISP	S	584					0											777.352	2124.36	1615.23	1058.19	1141.92	936.042	680.977	1475.37	1217.91	1057.14	2085.92	1576.79	1250.69	2035.35	1540.76
1437	893.908	2	1785.8	43.0444	0.6276	4.70914	A0A0H3BXI0	Uncharacterized protein OS=Streptococcus pyogenes serotype M49 (strain NZ131) OX=471876 GN=Spy49_1001c PE=3 SV=1	LKDTISDTVNSDEAAK	LKDTISDTVNSDEAAK	[6] Phospho (STY)	68.03	-0.483654	2	92.16	89.195	EKLKDTISDTVNSDE	S	152	LKDTISDTVNSDEAAK	[8] Phospho (STY)	8.0992	-0.496832	4	LKDTISDTVNSDEAA	T	154								2049.85	2833.53	2600.01	2014.53	2016.26	1453.99	1793.12	3041.78	2551.71	4753.47	7656.11	5695.68	2712.73	3080.64	2933.38
1441	636.286	3	1905.84	52.5107	0.804367	2.90859	B5XKM7	Enolase OS=Streptococcus pyogenes serotype M49 (strain NZ131) OX=471876 GN=eno PE=3 SV=1	GMVPSGASTGEHEAVELR	GMVPSGASTGEHEAVELR	[8] Phospho (STY)	110.51	3.36463	3	98.28	90.6567	GMVPSGASTGEHEAV	S	42	GMVPSGASTGEHEAVELR	[8] Phospho (STY)	7.7212	3.40475	2	GMVPSGASTGEHEAV	S	42								1575.2	1538.3	2203.37	1369.18	1202.22	1562.19	962.951	1490.16	1554.7	2465.54	3439.02	3979.39	1936.66	2361.48	2305.18
1445	461.245	2	920.475	45.4863	0.730217	2.28532	A0A0H3C1B0	Uncharacterized protein OS=Streptococcus pyogenes serotype M49 (strain NZ131) OX=471876 GN=Spy49_1166 PE=4 SV=1	IVIPGQSK	IVIPGQSK	[7] Phospho (STY)	23.96	1.86872	3	100	100	KIVIPGQSKTLHTNN	S	83					0											1458.64	2363.03	2120.83	885.858	861.44	1102.59	823.149	1195.27	1160.31	2472.94	3833.12	4003.16	1768.04	2385.19	2512.13
1477	569.288	2	1136.56	53.1717	0.763517	3.11634	B5XHX4	Serine--tRNA ligase OS=Streptococcus pyogenes serotype M49 (strain NZ131) OX=471876 GN=serS PE=3 SV=1	NIASAAIAQAK	NIASAAIAQAK	[4] Phospho (STY)	45.7	2.21802	4	100	100	KAERNIASAAIAQAK	S	56	NIASAAIAQAK	[4] Phospho (STY)	6.6738	2.19732	4	KAERNIASAAIAQAK	S	56	NIASAAIAQAK	[4] Phospho (STY)	19.0464	2.17661	KAERNIASAAIAQAK	S	56	290.739	659.269	583.676	852.007	712.284	780.254	156.636	550.977	446.477	2166.44	3500.71	3354.71	594.063	915.013	841.325
1496	879.056	3	2634.15	58.1161	0.8253	3.67036	A0A0H3BZ03	R3H domain protein OS=Streptococcus pyogenes serotype M49 (strain NZ131) OX=471876 GN=Spy49_0209 PE=4 SV=1	AQQPSIPVEESEVPQDPGNDGFSK					0						AQQPSIPVEESEVPQDPGNDGFSK	[11] Phospho (STY)	7.1355	-0.962546	12	PSIPVEESEVPQDPG	S	140								3363.53	5230.1	4647.72	1049.04	1097.49	1013.25	2311.28	3696.99	3367.73	5229.17	7503.71	7268.63	4382.73	5564.41	5149.13
1508	527.234	2	1052.45	28.6129	0.771117	2.56233	A0A0H3BZB4	Phosphoenolpyruvate-protein phosphotransferase OS=Streptococcus pyogenes serotype M49 (strain NZ131) OX=471876 GN=ptsI PE=3 SV=1	TSHSAIMAR	TSHSAIMAR	[2] Phospho (STY)	23.34	6.41295	2	49.74	49.31	TNIGGRTSHSAIMAR	S	190					0											1543.28	762.53	2472.41	1629.6	1459.25	1349.87	1600.78	2168.38	2269.25	1227.07	2337.82	2000.11	1870.5	2396.62	2357.69
1540	642.8	2	1283.59	56.0559	0.668633	3.67036	A0A0H3BYM9	Glyceraldehyde-3-phosphate dehydrogenase OS=Streptococcus pyogenes serotype M49 (strain NZ131) OX=471876 GN=plr PE=3 SV=1	VMEVDGSQLVK	VMEVDGSQLVK	[7] Phospho (STY)	51.45	1.43122	3	100	100	KVMEVDGSQLVKVVS	S	305	VMEVDGSQLVK	[7] Phospho (STY)	8.1367	1.49079	2	KVMEVDGSQLVKVVS	S	305	VMEVDGSQLVK	[7] Phospho (STY)	67.8209	1.47246	KVMEVDGSQLVKVVS	S	305	257.49	140.588	561.451	689.796	652.425	638.877	236.298	457.507	427.027	521.997	726.358	886.907	421.875	648.345	677.396
1548	600.626	3	1798.86	53.1717	0.6685	2.77008	A0A0H3C2S7	Uncharacterized protein OS=Streptococcus pyogenes serotype M49 (strain NZ131) OX=471876 GN=Spy49_1801c PE=4 SV=1	KDSDIKSVTEIVEEK	KDSDIKSVTEIVEEK	[7] Phospho (STY)	43.07	-2.28557	3	88.54	78.4267	KKDSDIKSVTEIVEE	S	87	KDSDIKSVTEIVEEK	[7] Phospho (STY)	6.5983	-2.29865	2	KKDSDIKSVTEIVEE	S	87	KDSDIKSVTEIVEEK	[7] Phospho (STY)	36.5376	-2.26923	KKDSDIKSVTEIVEE	S	87	1723.93	3610.99	3006.29	1984.61	1845.78	2305.46	756.535	1940.95	1502.81	4244.05	6987.23	6956.52	2403.87	3609.81	3192.48
1563	594.77	2	1187.53	32.5685	0.7226	3.25485	A0A0H3C124	Putative mannose-specific phosphotransferase system component IID OS=Streptococcus pyogenes serotype M49 (strain NZ131) OX=471876 GN=manN PE=4 SV=1	KLYTSPEDR	KLYTSPEDR	[5] Phospho (STY)	35.19	2.31893	2	49.99	49.99	ALKKLYTSPEDRATA	S	50					0											814.308	1763.74	1355.33	912.903	913.204	697.861	576.735	1070.6	868.775	3444.59	6260.95	4763.19	1140.49	1379.61	1246.44
1572	626.78	2	1251.54	67.1581	0.607383	3.39335	A0A0H3C0J7	Phosphocarrier protein HPr OS=Streptococcus pyogenes serotype M49 (strain NZ131) OX=471876 GN=ptsH PE=3 SV=1	FASDITLDYK	FASDITLDYK	[3] Phospho (STY)	49.16	1.66972	8	99.98	98.6412	QTASKFASDITLDYK	S	31	FASDITLDYK	[3] Phospho (STY)	6.6446	1.65092	2	QTASKFASDITLDYK	S	31								2105.5	4036.04	3594.38	1955.64	1643.86	1958.7	1230.25	2877.05	2760.05	1291.57	2050.53	2203.3	2431.1	3250.32	3246.71
1596	668.783	2	1335.55	36.9065	0.66135	3.53186	A0A0H3C114	Inosine-5'-monophosphate dehydrogenase OS=Streptococcus pyogenes serotype M49 (strain NZ131) OX=471876 GN=guaB PE=3 SV=1	YFQGSVNEANK	YFQGSVNEANK	[5] Phospho (STY)	44.22	1.54406	4	100	99.9275	SDRYFQGSVNEANKL	S	411	YFQGSVNEANK	[5] Phospho (STY)	7.0701	1.52644	5	SDRYFQGSVNEANKL	S	411	YFQGSVNEANK	[5] Phospho (STY)	78.5718	1.50882	SDRYFQGSVNEANKL	S	411	805.471	1620.82	1279.48	728.073	714.016	731.056	610.75	1081.57	953.548	3618.34	5393.62	5291.02	962.051	1178.9	1101.87
1613	561.789	2	1121.56	30.7137	0.750617	3.04709	A0A0H3BXB3	Uncharacterized protein OS=Streptococcus pyogenes serotype M49 (strain NZ131) OX=471876 GN=Spy49_0911c PE=4 SV=1	HGYVTKPIK	HGYVTKPIK	[5] Phospho (STY)	39.21	0.16781	5	99.99	99.88	YVKHGYVTKPIKKKY	T	56					0				HGYVTKPIK	[5] Phospho (STY)	17.4008	0.125845	YVKHGYVTKPIKKKY	T	56	426.703	1387.09	989.381	1315.09	1110.96	937.817	1001.98	2156.63	1630.04	1565.92	3271.93	2367.13	518.702	717.044	659.206
1616	1040.95	2	2079.88	47.0211	1.03003	5.67867	A0A0H3C1B5	Cell division protein SepF OS=Streptococcus pyogenes serotype M49 (strain NZ131) OX=471876 GN=sepF PE=3 SV=1	EQYQQSTCSDQTTIALK	EQYQQSTCSDQTTIALK	[7] Phospho (STY)|[8] Carbamidomethyl (C)	65.55	-0.09281	24	89.37	64.5325	REQYQQSTCSDQTTI	T	121	EQYQQSTCSDQTTIALK	[7] Phospho (STY)|[8] Carbamidomethyl (C)	7.9426	-0.104125	18	REQYQQSTCSDQTTI	T	121								8896.12	16421.9	12039.4	2264.11	2042.45	988.362	6102.2	11191.3	7242.42	3211.15	5899.91	3512.31	11663.4	11699.1	9438.38
1623	901.944	2	1801.87	46.1679	0.750667	4.77839	B5XMJ7	Cell cycle protein GpsB OS=Streptococcus pyogenes serotype M49 (strain NZ131) OX=471876 GN=gpsB PE=3 SV=1	NTVSATVQQPVPQPTR	NTVSATVQQPVPQPTR	[4] Phospho (STY)	81.01	0.457059	10	99.17	70.727	YQARNTVSATVQQPV	S	68	NTVSATVQQPVPQPTR	[4] Phospho (STY)	7.2134	0.499496	8	YQARNTVSATVQQPV	S	68								4849.43	9888.47	7351.16	2329.69	2251.33	1514.45	3528.81	6419.18	4808.09	2431.68	4390.58	3122.17	6043.32	6951.76	5592.3
1631	553.947	3	1658.82	53.9016	0.545517	2.63158	A0A0H3BZC7	EIIAB-Man OS=Streptococcus pyogenes serotype M49 (strain NZ131) OX=471876 GN=manL PE=4 SV=1	LLHGQVATAWTPASK	LLHGQVATAWTPASK	[8] Phospho (STY)	41.55	1.18497	4	99.65	97.585	LLHGQVATAWTPASK	T	186	LLHGQVATAWTPASK	[8] Phospho (STY)	7.8581	1.17078	11	LLHGQVATAWTPASK	T	186	LLHGQVATAWTPASK	[8] Phospho (STY)	48.6821	1.26298	LLHGQVATAWTPASK	T	186	1609.43	528.321	1878.96	1283.36	1001.28	839.877	913.969	1779.02	1987.32	2339.89	3603.71	4260.97	1947.44	2520.81	2446.11
1637	630.284	2	1258.55	37.2884	0.545683	3.25485	A0A0H3BY05	Carbamate kinase OS=Streptococcus pyogenes serotype M49 (strain NZ131) OX=471876 GN=arcC PE=3 SV=1	LEEVTVSQMK	LEEVTVSQMK	[7] Phospho (STY)|[9] Oxidation (M)	42.72	2.0824	5	99.49	94.706	KLEEVTVSQMKEYIT	S	258					0				LEEVTVSQMK	[7] Phospho (STY)|[9] Oxidation (M)	70.0376	2.045	KLEEVTVSQMKEYIT	S	258	645.16	3727.04	1452.68	1022.05	1187.66	1204.56	407.417	1077.09	823.78	5170.51	9219.62	8576.9	593.129	1237.31	1035.61
1642	756.317	3	2265.93	51.5966	0.906733	3.11634	A0A0H3BZ03	R3H domain protein OS=Streptococcus pyogenes serotype M49 (strain NZ131) OX=471876 GN=Spy49_0209 PE=4 SV=1	VLESGQDYTMDPMSNSERK	VLESGQDYTMDPMSNSERK	[16] Phospho (STY)	39.9	0.038041	3	86.66	61.1867	TMDPMSNSERKIVHK	S	270	VLESGQDYTMDPMSNSERK	[16] Phospho (STY)	7.4103	0.0276554	2	TMDPMSNSERKIVHK	S	270	VLESGQDYTMDPMSNSERK	[16] Phospho (STY)	79.7926	0.0510161	TMDPMSNSERKIVHK	S	270	1046.18	11.2522	1344.35	987.292	698.145	606.705	1035.05	1086.28	1298.87	6847.86	10420.2	10522.1	1696.14	2248.2	1990.51
1650	537.731	2	1073.45	24.4324	0.5661	2.77008	A0A0H3BYQ9	PTS system, IIB component OS=Streptococcus pyogenes serotype M49 (strain NZ131) OX=471876 GN=Spy49_0834 PE=4 SV=1	FDKSDPASK	FDKSDPASK	[4] Phospho (STY)	53.3	3.25509	3	99.88	99.1067	NVGRFDKSDPASKVK	S	112					0											739.607	2209.52	1702.6	662.24	584.697	534.328	661.376	1269.76	1300.45	4016.15	6904.87	6184.5	904.765	1198.89	942.097
1662	483.914	3	1448.72	57.9186	1.13272	2.42382	A0A0H3BZC1	Uncharacterized protein OS=Streptococcus pyogenes serotype M49 (strain NZ131) OX=471876 GN=Spy49_0377 PE=4 SV=1	GRPLLTDDIIEK	GRPLLTDDIIEK	[6] Phospho (STY)	35.58	-4.75874	2	100	100	-MGRPLLTDDIIEKA	T	7					0											2838.44	4055.52	4011.85	2537.12	2784.08	3559.13	2372.77	3547.02	4076.4	283.462	593.982	764.953	3148.63	4536.39	4861.73
1670	486.255	3	1455.74	43.5491	1.21422	2.28532	B5XJD9	Acetate kinase OS=Streptococcus pyogenes serotype M49 (strain NZ131) OX=471876 GN=ackA PE=3 SV=1	SKTIAINAGSSSLK	SKTIAINAGSSSLK	[3] Phospho (STY)	37.97	7.09503	3	54.59	52.3833	----MSKTIAINAGS	T	4					0											5044.67	8224.31	7149.82	4908.2	4300.71	4762.26	2771.24	3919.24	3906.22	2359.39	3780.05	4210.58	6917.87	9270.86	9314.08
1691	471.562	3	1411.67	40.0781	0.6479	2.70083	A0A0H3BWF1	Protein translocase subunit SecY OS=Streptococcus pyogenes serotype M49 (strain NZ131) OX=471876 GN=secY PE=3 SV=1	NSSYIPSVRPGR	NSSYIPSVRPGR	[4] Phospho (STY)	37.67	3.34361	2	99.96	99.94	NLQKNSSYIPSVRPG	Y	347					0				NSSYIPSVRPGR	[4] Phospho (STY)	43.6849	3.36444	NLQKNSSYIPSVRPG	Y	347	739.805	864.339	597.551	982.881	782.56	885.551	515.737	583.88	574.747	1061.24	1778.89	1803.16	417.628	809.939	816.281
1710	547.273	3	1638.8	28.5718	0.484267	2.56233	A0A0H3C1S0	CsbD domain-containing protein OS=Streptococcus pyogenes serotype M49 (strain NZ131) OX=471876 GN=Spy49_1665c PE=3 SV=1	SKIEQASGGLKEGAGK	SKIEQASGGLKEGAGK	[7] Phospho (STY)	32.96	-1.01413	2	99.84	99.805	KSKIEQASGGLKEGA	S	14					0											1339.44	2542.33	2050.5	1588.05	1587.1	1369.06	1335.57	1953.88	1847.35	802.392	1494.95	1353.43	1212.82	1562.65	1630.8
1723	714.834	2	1427.65	46.8161	0.348367	3.87812	A0A0H3BZ43	Uncharacterized protein OS=Streptococcus pyogenes serotype M49 (strain NZ131) OX=471876 GN=Spy49_1003c PE=3 SV=1	VSLQDKVSDMAR	VSLQDKVSDMAR	[8] Phospho (STY)	58.94	3.77716	8	100	99.9813	VSLQDKVSDMARSTF	S	141	VSLQDKVSDMAR	[8] Phospho (STY)	7.456	3.83072	6	VSLQDKVSDMARSTF	S	141								651.083	400.957	971.025	3995.93	3272.65	3635.8	617.05	1082.65	877.136	3196.97	5459.33	4300.01	1371.02	1732.76	1378.55
1743	525.227	2	1048.44	40.985	0.688967	2.63158	A0A0H3C049	Spi SpeB protease inhibitor OS=Streptococcus pyogenes serotype M49 (strain NZ131) OX=471876 GN=Spy49_1689c PE=4 SV=1	SMIEAYQK	SMIEAYQK	[1] Phospho (STY)	48.57	8.56735	3	100	99.81	LNHDNVRSMIEAYQK	S	88					0											876.054	535.505	1270.69	895.154	851.83	705.58	427.692	653.648	691.767	8833.34	13205.3	12524.7	871.123	1248.56	1172.75
1754	725.368	2	1448.72	57.9391	0.791717	3.94737	A0A0H3BZC1	Uncharacterized protein OS=Streptococcus pyogenes serotype M49 (strain NZ131) OX=471876 GN=Spy49_0377 PE=4 SV=1	GRPLLTDDIIEK	GRPLLTDDIIEK	[6] Phospho (STY)	36.36	-4.40356	2	100	100	-MGRPLLTDDIIEKA	T	7					0											3659	6810.13	5504.49	3822.49	3896.08	2652.31	2799.85	4860.33	4095.03	314.243	776.631	530.755	4674.02	5671.55	4321.98
1757	485.726	2	969.437	44.2717	0.804817	2.35457	B5XJ40	30S ribosomal protein S19 OS=Streptococcus pyogenes serotype M49 (strain NZ131) OX=471876 GN=rpsS PE=3 SV=1	LGEFAPTR	LGEFAPTR	[7] Phospho (STY)	43.15	5.5666	3	100	100	KLGEFAPTRTYKGHA	T	77					0				LGEFAPTR	[7] Phospho (STY)	92.9332	5.6212	KLGEFAPTRTYKGHA	T	77	197.454	429.527	321.475	107.642	107.216	160.837	130.668	238.216	305.577	127.103	254.104	283.976	152.779	249.514	317.056
1766	497.921	3	1490.74	56.3426	0.62765	2.35457	A0A0H3BWJ5	Transcription termination/antitermination protein NusG OS=Streptococcus pyogenes serotype M49 (strain NZ131) OX=471876 GN=nusG PE=3 SV=1	SKPTPLLEEEIR	SKPTPLLEEEIR	[1] Phospho (STY)	60.98	1.64553	6	99.42	90.135	VGSHGNRSKPTPLLE	S	105	SKPTPLLEEEIR	[1] Phospho (STY)	7.0692	1.62975	7	VGSHGNRSKPTPLLE	S	105								265.124	541.939	537.131	752.364	766.546	1042.08	267.18	445.345	460.141	1718.29	2674.62	3596.83	473.973	761.676	755.477
1771	621.785	2	1241.56	43.5696	0.668533	3.25485	B5XJA2	50S ribosomal protein L9 OS=Streptococcus pyogenes serotype M49 (strain NZ131) OX=471876 GN=rplI PE=3 SV=1	EATSQSIGELK	EATSQSIGELK	[4] Phospho (STY)	43.53	1.8902	5	91.56	88.478	NLAKEATSQSIGELK	S	41					0				EATSQSIGELK	[4] Phospho (STY)	32.5623	1.85229	NLAKEATSQSIGELK	S	41	240.185	581.333	422.693	397.308	364.571	389.582	249.745	508.901	336.267	1851.98	3099.4	2739.8	379.835	461.024	417.979
1777	577.917	3	1730.73	22.1136	0.4842	2.56233	A0A0H3BXH0	Endolytic murein transglycosylase OS=Streptococcus pyogenes serotype M49 (strain NZ131) OX=471876 GN=mltG PE=3 SV=1	TDFKDKDQQDQQR	TDFKDKDQQDQQR	[1] Phospho (STY)	47.83	1.62252	6	100	100	------MTDFKDKDQ	T	2					0											1408.46	3060.99	2498.6	1850.3	1717.14	1704.86	1494.4	2539.26	2402.79	1556.67	3107.36	2954.48	1697.08	2418.52	2420.57
1787	1190.04	2	2378.07	44.2103	0.689267	6.57895	B5XI23	Protein translocase subunit SecA OS=Streptococcus pyogenes serotype M49 (strain NZ131) OX=471876 GN=secA PE=3 SV=1	ATTAAPQNIQSQQSANTDDLPK	ATTAAPQNIQSQQSANTDDLPK	[17] Phospho (STY)	124.54	-1.44254	28	99.99	93.9593	QSQQSANTDDLPKVE	T	809	ATTAAPQNIQSQQSANTDDLPK	[17] Phospho (STY)	7.3676	-1.45243	28	QSQQSANTDDLPKVE	T	809								3862.03	7956.03	6176.37	1758.82	1666.61	1109.45	1681.22	3845.43	2955.99	135.258	525.575	342.044	4902.08	5619.06	5301.12
1792	748.853	2	1495.69	38.203	0.443417	3.87812	A0A0H3BXH0	Endolytic murein transglycosylase OS=Streptococcus pyogenes serotype M49 (strain NZ131) OX=471876 GN=mltG PE=3 SV=1	VVQANELQETASK	VVQANELQETASK	[12] Phospho (STY)	38.97	0.218345	4	89.74	78.4775	NELQETASKESQVPL	S	124	VVQANELQETASK	[12] Phospho (STY)	6.2294	0.202611	2	NELQETASKESQVPL	S	124	VVQANELQETASK	[12] Phospho (STY)	39.4579	0.253736	NELQETASKESQVPL	S	124	2372.37	4331.44	4030.73	2310.99	1916.82	1835.7	2458.39	3869.05	3398.65	1322.46	2290.69	1981.19	2696.08	3638.93	2986.32
1799	466.226	3	1395.65	39.0279	0.70215	2.00831	B5XKR6	30S ribosomal protein S21 OS=Streptococcus pyogenes serotype M49 (strain NZ131) OX=471876 GN=rpsU PE=3 SV=1	KNESLDDALRR	KNESLDDALRR	[4] Phospho (STY)	45.36	3.01239	2	100	100	TVVRKNESLDDALRR	S	11					0				KNESLDDALRR	[4] Phospho (STY)	34.8647	2.9618	TVVRKNESLDDALRR	S	11	586.935	1027.97	874.754	1340.04	1176.17	1261.61	526.641	685.927	671.472	1648.6	2695.13	2508.13	581.383	835.379	777.418
1809	642.315	2	1282.62	56.6836	0.640733	3.39335	B5XMC3	Arginine deiminase OS=Streptococcus pyogenes serotype M49 (strain NZ131) OX=471876 GN=arcA PE=3 SV=1	NTITNAILESK	NTITNAILESK	[10] Phospho (STY)	43.99	-0.936791	2	99.99	99.755	ITNAILESKGLKLIK	S	379	NTITNAILESK	[10] Phospho (STY)	7.7472	-0.877174	3	ITNAILESKGLKLIK	S	379								648.316	1549.12	1220.05	880.172	703.71	803.628	359.469	1005.04	893.954	3523.43	6057.12	5870.04	792.433	1161.77	1086.51
1860	721.824	2	1441.63	34.8874	0.763767	3.87812	A0A0H3BXC6	Signal recognition particle receptor FtsY OS=Streptococcus pyogenes serotype M49 (strain NZ131) OX=471876 GN=ftsY PE=3 SV=1	VSELSQSTASEPK					0						VSELSQSTASEPK	[7] Phospho (STY)	7.0084	0.074914	2	KVSELSQSTASEPKD	S	107								954.362	2434.8	1999.26	675.813	588.989	508.376	982.451	1829.89	1729	1472.74	2898.78	2768.69	1297.27	1827.97	1823.14
1881	803.356	2	1604.7	48.6714	0.784283	4.08587	B5XL08	Phosphopentomutase OS=Streptococcus pyogenes serotype M49 (strain NZ131) OX=471876 GN=deoB PE=3 SV=1	TISTEDNPTGYVTK	TISTEDNPTGYVTK	[4] Phospho (STY)	44.73	0.220659	3	74.48	56.6267	IPLKTISTEDNPTGY	T	72	TISTEDNPTGYVTK	[3] Phospho (STY)	7.2754	0.268311	3	PIPLKTISTEDNPTG	S	71	TISTEDNPTGYVTK	[4] Phospho (STY)	70.198	0.253646	IPLKTISTEDNPTGY	T	72	754.326	1609.31	1225.4	920.861	896.778	817.746	429.695	868.261	651.263	8184.31	13510	12255.8	852.787	1265.29	1106.3
1882	590.575	3	1768.7	26.0078	0.6816	2.70083	B5XJ39	50S ribosomal protein L2 OS=Streptococcus pyogenes serotype M49 (strain NZ131) OX=471876 GN=rplB PE=3 SV=1	GSVMNPNDHPHGGGEGK	GSVMNPNDHPHGGGEGK	[2] Phospho (STY)	41.99	2.17058	2	100	100	IRPTVRGSVMNPNDH	S	223	GSVMNPNDHPHGGGEGK	[2] Phospho (STY)	7.6804	2.21381	3	IRPTVRGSVMNPNDH	S	223	GSVMNPNDHPHGGGEGK	[2] Phospho (STY)	40.6803	2.13066	IRPTVRGSVMNPNDH	S	223	339.682	77.8231	503.731	198.648	188.997	180.238	255.933	457.863	478.106	341.725	754.689	756.55	288.483	520.256	501.268
1887	977.421	2	1952.83	41.2643	0.750417	5.12465	A0A0H3BZL9	PTS system_ fructose-specific IIABC component OS=Streptococcus pyogenes serotype M49 (strain NZ131) OX=471876 GN=fruA PE=4 SV=1	EEQTSTGLGDGIAMPHSK	EEQTSTGLGDGIAMPHSK	[4] Phospho (STY)|[14] Oxidation (M)	116.35	4.74138	8	97.2	65.6925	IMTREEQTSTGLGDG	T	55	EEQTSTGLGDGIAMPHSK	[4] Phospho (STY)|[14] Oxidation (M)	7.1068	4.78054	8	IMTREEQTSTGLGDG	T	55								2241.38	10397.5	3951.83	2620.85	2761.95	1687.6	1152.75	3217.5	1635.99	8716.15	16874.6	10361.5	2758.39	3481.36	2657.44
1904	494.225	2	986.435	28.1287	1.28852	2.56233	B5XKA6	Threonine--tRNA ligase OS=Streptococcus pyogenes serotype M49 (strain NZ131) OX=471876 GN=thrS PE=3 SV=1	GPHVPSTGR					0										0				GPHVPSTGR	[6] Phospho (STY)	86.6459	2.08016	CRGPHVPSTGRIQVF	S	186	437.489	1202.94	972.906	887.442	807.556	768.078	417.756	775.664	792.915	976.554	2103.8	1757.56	475.707	723.8	644.307
1905	723.325	2	1444.64	35.1127	0.648117	3.73961	A0A0H3BY55	Non-specific serine/threonine protein kinase OS=Streptococcus pyogenes serotype M49 (strain NZ131) OX=471876 GN=Spy49_1257c PE=4 SV=1	TNYQTDQVAVAR	TNYQTDQVAVAR	[3] Phospho (STY)	59.45	0.552148	10	100	99.925	IKVLRTNYQTDQVAV	Y	48	TNYQTDQVAVAR	[3] Phospho (STY)	6.5984	0.60508	10	IKVLRTNYQTDQVAV	Y	48	TNYQTDQVAVAR	[3] Phospho (STY)	59.3029	0.519568	IKVLRTNYQTDQVAV	Y	48	869.061	2083.44	1647.69	920.606	896.736	741.821	1102.87	2043.64	1752.49	2437.64	4709.56	3766.53	1047.65	1501.94	1372.12
1916	600.282	3	1797.82	46.8573	0.56625	2.97784	B5XIY2	Histidine ammonia-lyase OS=Streptococcus pyogenes serotype M49 (strain NZ131) OX=471876 GN=hutH PE=3 SV=1	NLLEGSQNTTVATQSR	NLLEGSQNTTVATQSR	[15] Phospho (STY)	87.58	-1.06152	3	98.44	82.0333	NTTVATQSRVQDPYT	S	274	NLLEGSQNTTVATQSR	[15] Phospho (STY)	7.721	-1.07461	4	NTTVATQSRVQDPYT	S	274								657.83	991.997	794.629	764.347	748.913	1080.5	687.574	865.242	1076.94	9974.22	12491	19347	627.29	1147.25	1174.02
1918	750.825	2	1499.64	40.5008	0.688867	3.94737	B5XJR0	30S ribosomal protein S7 OS=Streptococcus pyogenes serotype M49 (strain NZ131) OX=471876 GN=rpsG PE=3 SV=1	EIMDAANNTGASVK	EIMDAANNTGASVK	[12] Phospho (STY)	79.61	1.97882	3	99.94	99.2167	AANNTGASVKKREDT	S	134	EIMDAANNTGASVK	[12] Phospho (STY)	7.5618	1.96313	3	AANNTGASVKKREDT	S	134	EIMDAANNTGASVK	[12] Phospho (STY)	69.7344	2.01412	AANNTGASVKKREDT	S	134	30.457	85.2337	116.674	59.8586	50.8557	63.3606	16.3121	59.5043	48.2116	218.203	508.84	403.998	57.9081	107.063	95.0604
1928	546.249	3	1635.73	46.6728	0.586733	2.63158	A0A0H3BWJ5	Transcription termination/antitermination protein NusG OS=Streptococcus pyogenes serotype M49 (strain NZ131) OX=471876 GN=nusG PE=3 SV=1	NTPNVTGFVGSHGNR	NTPNVTGFVGSHGNR	[11] Phospho (STY)	44.96	6.30219	2	99.83	99.43	NVTGFVGSHGNRSKP	S	100	NTPNVTGFVGSHGNR	[11] Phospho (STY)	6.9241	6.34893	5	NVTGFVGSHGNRSKP	S	100								1109.14	1923.25	1744.37	1658.18	1419.36	1865.52	638.896	1125.99	1130.35	6199.67	9583.22	9683.51	1082.98	1732.93	1614.7
1933	624.295	3	1869.86	58.403	0.64815	2.90859	A0A0H3BZL3	Conserved hypothetical integral membrane protein OS=Streptococcus pyogenes serotype M49 (strain NZ131) OX=471876 GN=Spy49_1194c PE=4 SV=1	ELFQLQNSGEDLNKR					0						ELFQLQNSGEDLNKR	[8] Phospho (STY)	6.6528	1.08445	7	ELFQLQNSGEDLNKR	S	186								2221.04	3680.38	2829.48	1679.53	1627.29	1741.94	1411.85	2007.42	2046.53	7952.49	9369.45	9712	2291.09	3005.09	2816.15
1969	720	3	2156.98	58.2184	0.430267	3.73961	B5XIW8	10 kDa chaperonin OS=Streptococcus pyogenes serotype M49 (strain NZ131) OX=471876 GN=groS PE=3 SV=1	FDDEKEQTVGGFVLAGTHK	FDDEKEQTVGGFVLAGTHK	[8] Phospho (STY)	28.57	0.44777	2	99.89	99.855	FDDEKEQTVGGFVLA	T	20	FDDEKEQTVGGFVLAGTHK	[8] Phospho (STY)	7.6555	0.483221	14	FDDEKEQTVGGFVLA	T	20								3609.2	6843.38	5713.57	838.501	855.303	720.326	2204.74	3878.84	3098.31	927.044	1617.1	1512.13	2936.43	3585.26	3049.91
1986	621.549	4	2482.17	49.4628	0.402167	3.3241	A0A0H3BZD6	Putative PTS system enzyme II OS=Streptococcus pyogenes serotype M49 (strain NZ131) OX=471876 GN=Spy49_1737c PE=4 SV=1	TEDEAKLPETPVSDAPVATAPHK					0										0				TEDEAKLPETPVSDAPVATAPHK	[13] Phospho (STY)	24.9392	0.919757	KLPETPVSDAPVATA	S	507	1879.37	2523.42	2144.17	1083.81	831.642	836.419	1304.97	2896.46	2827.97	5925.68	8320.72	10287	1756.78	2309.51	2429.92
2010	760.351	3	2278.03	61.0618	0.42265	4.01662	A0A0H3BZC7	EIIAB-Man OS=Streptococcus pyogenes serotype M49 (strain NZ131) OX=471876 GN=manL PE=4 SV=1	AVEGGVEINELNVGSMAHSTGK					0						AVEGGVEINELNVGSMAHSTGK	[19] Phospho (STY)	7.6739	0.0183045	2	NVGSMAHSTGKTMVN	S	277								632.003	44.1379	692.931	388.065	259.415	292.876	296.253	634.618	585.955	815.469	3518.14	4038.91	1564.48	1716.01	1886.16
2014	500.225	3	1497.65	41.2848	0.6815	2.21607	B5XJ60	30S ribosomal protein S13 OS=Streptococcus pyogenes serotype M49 (strain NZ131) OX=471876 GN=rpsM PE=3 SV=1	DLTSDQEDAIRR					0										0				DLTSDQEDAIRR	[4] Phospho (STY)	33.1915	3.85664	IRVKDLTSDQEDAIR	S	50	830.201	1637.09	1452.05	820.491	850.257	1125.89	640.536	1037.57	1014	1728.96	2572.41	3075.36	973.548	1630.86	1544.33
2015	747.873	2	1493.73	56.6426	0.4638	4.08587	A0A0H3C1H3	Fructose-bisphosphate aldolase class II OS=Streptococcus pyogenes serotype M49 (strain NZ131) OX=471876 GN=fba PE=4 SV=1	QAPVLIQTSMGAAK	QAPVLIQTSMGAAK	[9] Phospho (STY)	31.68	0.573534	3	85.25	83.1533	APVLIQTSMGAAKYM	S	50	QAPVLIQTSMGAAK	[9] Phospho (STY)	7.7576	0.557779	2	APVLIQTSMGAAKYM	S	50	QAPVLIQTSMGAAK	[9] Phospho (STY)	57.9165	0.608971	APVLIQTSMGAAKYM	S	50	75.6767	1292.73	493.857	3951.44	652.244	3511.87	130.332	461.865	469.325	67.8183	552.158	712.207	491.94	997.445	911.348
2031	527.749	2	1053.48	38.5437	0.30715	2.56233	A0A0H3BZC9	Uridylate kinase OS=Streptococcus pyogenes serotype M49 (strain NZ131) OX=471876 GN=pyrH PE=3 SV=1	LSGEALAGEK	LSGEALAGEK	[2] Phospho (STY)	51.25	9.43434	3	100	100	QRILIKLSGEALAGE	S	13					0											138.051	341.026	200.251	174.903	149.182	96.9628	176.557	169.879	222.255	675.942	1356.27	959.192	243.599	278.636	188.254
2035	593.936	3	1778.79	28.7153	0.525217	2.49307	A0A0H3BXI0	Uncharacterized protein OS=Streptococcus pyogenes serotype M49 (strain NZ131) OX=471876 GN=Spy49_1001c PE=3 SV=1	TKEEHEAASVTVQDR	TKEEHEAASVTVQDR	[9] Phospho (STY)	50.94	2.00731	6	99.74	97.135	KEEHEAASVTVQDRV	S	122	TKEEHEAASVTVQDR	[9] Phospho (STY)	7.7998	1.99408	7	KEEHEAASVTVQDRV	S	122								726.43	2210.41	1288.86	982.93	1007.77	993.858	916.383	1568.52	1159.04	2640.29	4687.54	4119.42	1267.64	1738.33	1524.84
2039	936.422	2	1870.83	48.1461	1.29643	4.98615	B5XIW7	60 kDa chaperonin OS=Streptococcus pyogenes serotype M49 (strain NZ131) OX=471876 GN=groL PE=3 SV=1	DSTVIVEGSGSSEAIANR	DSTVIVEGSGSSEAIANR	[12] Phospho (STY)	56.86	-0.964972	8	68.87	50.1775	IVEGSGSSEAIANRI	S	337	DSTVIVEGSGSSEAIANR	[11] Phospho (STY)	8.1883	-0.977551	11	VIVEGSGSSEAIANR	S	336	DSTVIVEGSGSSEAIANR	[12] Phospho (STY)	54.4588	-0.936677	IVEGSGSSEAIANRI	S	337	502.832	1511.15	883.042	819.04	740.22	484.21	651.447	1127.37	893.291	4133.08	6027.27	4921.65	516.893	640.307	490.43
2055	686.824	2	1371.63	55.8585	0.75055	3.60111	P0C096	Protein RecA OS=Streptococcus pyogenes serotype M49 (strain NZ131) OX=471876 GN=recA PE=3 SV=2	IIEIYGPESSGK	IIEIYGPESSGK	[10] Phospho (STY)	42.56	0.421065	5	50	49.992	EIYGPESSGKTTVAL	S	83					0											456.522	1142.34	834.437	1054.55	988.702	1196.77	308.035	701.225	613.573	3992.87	6525.77	6918.3	595.711	1014.99	958.742
2062	610.837	2	1219.66	51.5425	0.545517	3.25485	A0A0H3C2S7	Uncharacterized protein OS=Streptococcus pyogenes serotype M49 (strain NZ131) OX=471876 GN=Spy49_1801c PE=4 SV=1	NKETLVIPVK	NKETLVIPVK	[4] Phospho (STY)	42.76	0.820919	4	100	100	EVSKNKETLVIPVKT	T	125					0				NKETLVIPVK	[4] Phospho (STY)	71.4668	0.864319	EVSKNKETLVIPVKT	T	125	2924.49	5930.15	4303	851.398	946.087	696.602	1493.89	2622.72	1773.33	547.165	898.349	647.101	3236.66	4088.18	2665.19
2086	610.953	3	1829.84	57.6727	0.607217	2.97784	A0A0H3C1H3	Fructose-bisphosphate aldolase class II OS=Streptococcus pyogenes serotype M49 (strain NZ131) OX=471876 GN=fba PE=4 SV=1	VNVNTESQIAFSNATR	VNVNTESQIAFSNATR	[5] Phospho (STY)	93.09	2.66268	3	99.85	99.33	VAKVNVNTESQIAFS	T	233	VNVNTESQIAFSNATR	[5] Phospho (STY)	8.4245	2.70447	11	VAKVNVNTESQIAFS	T	233								1482.29	2121.6	2059.56	1066.06	1341.94	1939.02	847.527	1376.19	1648.02	1042.31	1476.59	2512.75	1419.51	2257.62	2528.51
2090	641.617	3	1921.83	46.032	1.25548	2.90859	B5XKM7	Enolase OS=Streptococcus pyogenes serotype M49 (strain NZ131) OX=471876 GN=eno PE=3 SV=1	GMVPSGASTGEHEAVELR					0						GMVPSGASTGEHEAVELR	[2] Oxidation (M)|[5] Phospho (STY)	7.4626	2.21851	2	FGRGMVPSGASTGEH	S	39								1472.69	3798.35	2644.32	510.907	607.191	643.849	5806.62	10611.3	9289.92	6320.9	9249.51	9186	1263.6	1818.03	1772.8
2105	475.564	3	1423.67	29.1996	0.668617	2.35457	A0A0H3C1S0	CsbD domain-containing protein OS=Streptococcus pyogenes serotype M49 (strain NZ131) OX=471876 GN=Spy49_1665c PE=3 SV=1	IEQASGGLKEGAGK					0						IEQASGGLKEGAGK	[5] Phospho (STY)	7.5314	-0.678849	2	KSKIEQASGGLKEGA	S	14	IEQASGGLKEGAGK	[5] Phospho (STY)	46.7035	-0.641668	KSKIEQASGGLKEGA	S	14	1046.67	1762.47	1517.22	1588.91	1440.61	1592.93	993.302	1227.03	1252.11	535.62	920.074	1028.18	906.243	1319.85	1298.36
2112	564.289	2	1126.56	46.5573	0.750783	2.90859	A0A0H3BX27	Dihydrolipoyl dehydrogenase OS=Streptococcus pyogenes serotype M49 (strain NZ131) OX=471876 GN=acoL PE=3 SV=1	TVTIGSQTIK					0										0				TVTIGSQTIK	[6] Phospho (STY)	72.2465	-0.659535	DKTVTIGSQTIKGRN	S	253	673.59	1530.44	1108.43	2640.32	2284.97	2162.6	628.699	946.411	903.164	756.497	1277.72	1399.85	1048.67	1446.17	1336.5
2159	547.248	3	1638.72	27.3783	0.742933	2.56233	B5XJH8	Adenylosuccinate synthetase OS=Streptococcus pyogenes serotype M49 (strain NZ131) OX=471876 GN=purA PE=3 SV=1	EVGHEYGTTTGRPR					0										0				EVGHEYGTTTGRPR	[10] Phospho (STY)	26.2563	5.05594	GHEYGTTTGRPRRVG	T	300	88.1646	461.578	291.919	419.801	517.483	524.53	66.5951	246.847	248.97	276.482	696.757	584.056	140.31	228.878	270.915
2204	693.804	2	1385.59	45.7452	0.586633	3.4626	A0A0H3BYM9	Glyceraldehyde-3-phosphate dehydrogenase OS=Streptococcus pyogenes serotype M49 (strain NZ131) OX=471876 GN=plr PE=3 SV=1	NVSVDEINAAMK	NVSVDEINAAMK	[3] Phospho (STY)|[11] Oxidation (M)	39.09	2.7681	4	100	100	VTLDKNVSVDEINAA	S	255					0											525.86	2315.05	955.789	467.933	569.36	601.882	541.238	1042.91	733.904	2406.43	4172.22	3882.01	363.587	584.255	487.318
2216	656.294	3	1965.86	46.5573	1.13265	3.04709	A0A0H3BXI0	Uncharacterized protein OS=Streptococcus pyogenes serotype M49 (strain NZ131) OX=471876 GN=Spy49_1001c PE=3 SV=1	VTSAASSTSQFVSEQTEK	VTSAASSTSQFVSEQTEK	[9] Phospho (STY)	111.75	1.846	20	96.57	71.7955	TSAASSTSQFVSEQT	S	137	VTSAASSTSQFVSEQTEK	[9] Phospho (STY)	8.5871	1.83403	23	TSAASSTSQFVSEQT	S	137								672.19	958.02	921.062	470.035	430.784	1299.84	746.997	967.222	1400.97	2513.03	3068.84	8373.88	960.583	2315.36	3083.94
2222	524.235	3	1569.68	46.9597	0.402433	2.70083	A0A0H3BZ18	Cell-division initiation protein OS=Streptococcus pyogenes serotype M49 (strain NZ131) OX=471876 GN=divIVA PE=4 SV=1	ATYDAQHLLDESK	ATYDAQHLLDESK	[3] Phospho (STY)	44.01	8.03251	2	99.99	99.955	NLVSKATYDAQHLLD	Y	98	ATYDAQHLLDESK	[3] Phospho (STY)	6.9042	8.01752	3	NLVSKATYDAQHLLD	Y	98								845.88	1397.57	1248.45	1286.54	1244.6	1320.82	1138.99	1551.02	1717.29	5112.68	7583.61	8470.28	1376.35	2526.36	2202.03
2223	794.393	2	1586.77	59.3711	0.8322	4.50139	B5XI32	Elongation factor P OS=Streptococcus pyogenes serotype M49 (strain NZ131) OX=471876 GN=efp PE=3 SV=1	LIINTAEGTYVSRA	LIINTAEGTYVSRA	[12] Phospho (STY)	56.21	0.0878253	4	99.07	93.335	TAEGTYVSRA-----	S	183	LIINTAEGTYVSRA	[12] Phospho (STY)	6.892	0.0729944	3	TAEGTYVSRA-----	S	183								269.834	592.973	385.285	527.71	445.467	423.909	303.89	778.828	522.31	4001.48	6341.69	6255.6	672.597	978.748	950.729
2238	735.344	2	1468.67	46.1139	0.64815	3.94737	B5XJR1	Elongation factor G OS=Streptococcus pyogenes serotype M49 (strain NZ131) OX=471876 GN=fusA PE=3 SV=1	VEANVGAPQVSYR	VEANVGAPQVSYR	[11] Phospho (STY)	78.12	1.69277	3	100	99.9933	NVGAPQVSYRETFRA	S	480	VEANVGAPQVSYR	[11] Phospho (STY)	7.9701	1.67674	6	NVGAPQVSYRETFRA	S	480	VEANVGAPQVSYR	[11] Phospho (STY)	75.7417	1.72881	NVGAPQVSYRETFRA	S	480	460.308	1178.55	684.669	488.698	343.897	272.974	282.301	664.807	451.994	1015.99	2090.1	1542.31	447.171	684.915	590.732
2257	824.326	3	2469.96	56.868	0.484283	3.1856	B5XJR1	Elongation factor G OS=Streptococcus pyogenes serotype M49 (strain NZ131) OX=471876 GN=fusA PE=3 SV=1	IGETHEGASQMDWMEQEQER	IGETHEGASQMDWMEQEQER	[9] Phospho (STY)	56.32	-0.0198766	10	50	50	GETHEGASQMDWMEQ	S	48	IGETHEGASQMDWMEQEQER	[9] Phospho (STY)	7.3042	-0.0294044	10	GETHEGASQMDWMEQ	S	48								3086.89	0	3218.8	1169.88	632.593	471.902	2416.02	2798.32	3455.24	1983.85	3244.37	3134.82	3624.32	4189.33	3883.05
2267	531.754	2	1061.49	24.3579	0.545617	2.83934	A0A0H3BX27	Dihydrolipoyl dehydrogenase OS=Streptococcus pyogenes serotype M49 (strain NZ131) OX=471876 GN=acoL PE=3 SV=1	APAQAASAAPK	APAQAASAAPK	[7] Phospho (STY)	25.62	2.39797	3	100	100	KAPAQAASAAPKAAL	S	118					0											489.194	820.844	1163.14	960.853	859.472	784.04	416.663	853.902	905.963	602.699	1298.61	1103.28	675.14	1058.26	927.857
2274	705.848	2	1409.68	75.6153	0.66115	3.87812	A0A0H3C219	Uncharacterized protein OS=Streptococcus pyogenes serotype M49 (strain NZ131) OX=471876 GN=Spy49_1782 PE=4 SV=1	EAASEIISNVLGK	EAASEIISNVLGK	[8] Phospho (STY)	61.51	1.20608	13	99.96	97.8031	EAASEIISNVLGKHL	S	60					0											792.314	1911.1	1672.71	785.519	608.98	952.21	409.365	680.129	639.951	2127.97	3645.39	4149.2	1705.38	2137.58	2381.13
2290	570.602	3	1708.78	54.3448	0.60695	2.90859	A0A0H3BYQ3	30S ribosomal protein S3 OS=Streptococcus pyogenes serotype M49 (strain NZ131) OX=471876 GN=rpsC PE=3 SV=1	AEGYSEGTVPLHTLR	AEGYSEGTVPLHTLR	[5] Phospho (STY)	38.1	1.19812	3	99.64	97.5633	IARAEGYSEGTVPLH	S	159	AEGYSEGTVPLHTLR	[5] Phospho (STY)	7.8642	1.24287	4	IARAEGYSEGTVPLH	S	159	AEGYSEGTVPLHTLR	[5] Phospho (STY)	62.8314	1.27385	IARAEGYSEGTVPLH	S	159	497.636	1072.15	1089.72	539.011	406.658	576.369	214.468	897.999	672.975	659.131	1133.1	1148.77	571.237	806.808	855.84
2313	1152.52	2	2303.02	63.3053	0.647917	6.57895	A0A0H3BYW2	EIICB-Lac OS=Streptococcus pyogenes serotype M49 (strain NZ131) OX=471876 GN=lacE PE=4 SV=1	VYDEQILAEEAAGTNSSDALK	VYDEQILAEEAAGTNSSDALK	[17] Phospho (STY)	92.14	-1.42227	4	49.66	42.115	EAAGTNSSDALKEKV	S	428	VYDEQILAEEAAGTNSSDALK	[17] Phospho (STY)	7.1298	-1.43249	4	EAAGTNSSDALKEKV	S	428								1260.97	2845.66	2033.41	599.824	479.591	292.691	450.737	880.383	699.516	7387.72	10869.9	9365.35	2224.62	1922.66	1432.14
2327	504.889	3	1511.64	27.2014	0.484083	2.28532	A0A0H3C1Q9	ATPase, AAA family OS=Streptococcus pyogenes serotype M49 (strain NZ131) OX=471876 GN=Spy49_1655 PE=3 SV=1	DGHYAGSKDLGNAK					0										0				DGHYAGSKDLGNAK	[7] Phospho (STY)	40.1827	2.84929	RDGHYAGSKDLGNAK	S	363	414.073	1176.63	842.003	784.057	760.121	768.66	746.517	1063.41	1020.43	1562.68	2945.75	2517.63	564.862	748.5	779.614
2329	542.693	2	1083.37	39.771	1.29583	2.77008	B5XJ02	UPF0297 protein Spy49_1751c OS=Streptococcus pyogenes serotype M49 (strain NZ131) OX=471876 GN=Spy49_1751c PE=3 SV=1	GFTDETVR	GFTDETVR	[3] Phospho (STY)|[6] Phospho (STY)	37.18	3.90584	2			----MGFTDETVRFK; T4T7	T,T	4, 7					0				GFTDETVR	[3] Phospho (STY)|[6] Phospho (STY)	67.5689	3.9547	----MGFTDETVRFK; T4T7	T,T	4, 7	1796.43	5063.45	4118.19	4203.17	4139.71	4291.55	2404.57	4808.65	4576.33	393.982	980.428	986.441	851.988	1430.7	1401.98
2331	584.767	2	1167.52	49.1352	0.566	2.97784	A0A0H3BZQ5	SSU ribosomal protein S1p OS=Streptococcus pyogenes serotype M49 (strain NZ131) OX=471876 GN=rpsA PE=4 SV=1	VLSIDEEAGR	VLSIDEEAGR	[3] Phospho (STY)	30.97	2.49913	4	100	100	EVEVKVLSIDEEAGR	S	249	VLSIDEEAGR	[3] Phospho (STY)	7.4595	2.56462	2	EVEVKVLSIDEEAGR	S	249								461.073	993.28	735.148	1267.99	1127.57	2082.43	360.233	581.367	547.082	2632.98	4182.68	3785.15	796.613	1089.26	1050.71
2335	675.844	2	1349.67	61.7302	0.661017	3.4626	A0A0H3BVE1	30S ribosomal protein S5 OS=Streptococcus pyogenes serotype M49 (strain NZ131) OX=471876 GN=rpsE PE=3 SV=1	SLGSNTPINIVR	SLGSNTPINIVR	[1] Phospho (STY)	65.15	2.08874	3	99.63	99.23	VADITSKSLGSNTPI	S	126	SLGSNTPINIVR	[1] Phospho (STY)	7.1256	2.0713	3	VADITSKSLGSNTPI	S	126	SLGSNTPINIVR	[1] Phospho (STY)	90.3233	2.05386	VADITSKSLGSNTPI	S	126	158.27	525.079	339.927	275.075	218.968	346.888	37.5224	261.938	237.597	150.543	344.077	336.454	77.6269	183.789	163.421
2346	573.777	2	1145.54	55.879	0.5251	2.70083	A0A0H3BZ39	Fc-gamma receptor OS=Streptococcus pyogenes serotype M49 (strain NZ131) OX=471876 GN=Spy49_1672c PE=4 SV=1	DKELSFLSK	DKELSFLSK	[8] Phospho (STY)	39.97	1.99482	2	96.08	94.25	DKELSFLSKVLDEAA	S	100					0											3773.52	6098.59	5340.88	3347.95	3541.85	3213.61	2330.82	3586.28	3066.17	476.91	883.821	708.548	888.773	1172.04	969.851
2356	621.288	2	1240.56	70.8346	1.49373	3.1856	B5XKI1	Elongation factor Tu OS=Streptococcus pyogenes serotype M49 (strain NZ131) OX=471876 GN=tuf PE=3 SV=1	TVGSGIVSEIEA	TVGSGIVSEIEA	[1] Phospho (STY)	64.02	2.17853	5	99.26	89.902	SIREGGRTVGSGIVS	T	387					0											508.182	1538.94	1187.89	746.873	505.112	762.849	521.473	1048.22	1039.08	5283.03	9152.38	11283.4	1032.93	1623.47	1640.7
2381	673.333	3	2016.98	66.1283	0.450517	2.90859	B5XIW7	60 kDa chaperonin OS=Streptococcus pyogenes serotype M49 (strain NZ131) OX=471876 GN=groL PE=3 SV=1	IALIKSQLETTTSDFDR	IALIKSQLETTTSDFDR	[6] Phospho (STY)	70.68	0.433902	4	99.56	96.825	NRIALIKSQLETTTS	S	349	IALIKSQLETTTSDFDR	[6] Phospho (STY)	7.9462	0.471814	14	NRIALIKSQLETTTS	S	349								497.225	988.98	807.972	686.439	624.921	786.565	540.387	1110.42	1105.48	2424.73	3573.16	4923.09	820.029	1327.68	1370.23
2391	575.29	2	1148.57	50.9356	0.927217	3.04709	B5XJ99	30S ribosomal protein S4 OS=Streptococcus pyogenes serotype M49 (strain NZ131) OX=471876 GN=rpsD PE=3 SV=1	VDPGQVISVR	VDPGQVISVR	[8] Phospho (STY)	48.34	6.39626	2	100	100	VDPGQVISVREKSMK	S	141					0											145.09	388.938	292.784	3294.45	3239.36	3375.24	81.1579	167.558	160.172	420.459	730.64	644.664	158.366	266.958	271.318
2395	374.863	3	1121.57	30.7137	0.6071	1.80055	A0A0H3BXB3	Uncharacterized protein OS=Streptococcus pyogenes serotype M49 (strain NZ131) OX=471876 GN=Spy49_0911c PE=4 SV=1	HGYVTKPIK	HGYVTKPIK	[5] Phospho (STY)	39.21	4.46338	5	99.99	99.864	YVKHGYVTKPIKKKY	T	56					0											360.867	620.537	542.414	704.021	647.899	711.345	878.084	1283.59	1229.32	1012.1	1685.73	1725.48	329.585	477.385	522.676
2409	888.408	2	1774.8	64.0482	0.5252	4.84765	B5XI40	30S ribosomal protein S6 OS=Streptococcus pyogenes serotype M49 (strain NZ131) OX=471876 GN=rpsF PE=3 SV=1	FDSILTDNGATVVESK	FDSILTDNGATVVESK	[3] Phospho (STY)	66.73	-0.396375	8	99.97	99.3738	ALVARFDSILTDNGA	S	28	FDSILTDNGATVVESK	[3] Phospho (STY)	7.9652	-0.409634	17	ALVARFDSILTDNGA	S	28								498.047	1175.62	794.858	1989.36	1655.78	1546.52	277.277	872.953	709.747	2235.55	4262.19	4072.3	869.565	1246.45	1225.63
2413	732.37	3	2194.09	91.3354	0.866033	3.39335	B5XKI1	Elongation factor Tu OS=Streptococcus pyogenes serotype M49 (strain NZ131) OX=471876 GN=tuf PE=3 SV=1	DTDKPLLLPVEDVFSITGR	DTDKPLLLPVEDVFSITGR	[17] Phospho (STY)	43.48	-1.63964	5	95.6	66.976	VEDVFSITGRGTVAS	T	225	DTDKPLLLPVEDVFSITGR	[15] Phospho (STY)	7.218	-1.60479	7	LPVEDVFSITGRGTV	S	223								104.188	473.47	110.352	389.508	176.524	398.321	225.736	435.516	601.819	2603.23	4470.09	6243.12	2515.5	3785.53	4101.13
2418	553.721	2	1105.43	28.4899	0.865967	2.70083	B5XLJ2	Serine hydroxymethyltransferase OS=Streptococcus pyogenes serotype M49 (strain NZ131) OX=471876 GN=glyA PE=3 SV=1	YAEGYPGNR	YAEGYPGNR	[1] Phospho (STY)	50.25	3.61432	3	100	99.6433	GSVLTNKYAEGYPGN	Y	55					0											118.044	345.964	346.184	1526.9	1265.15	1006.95	152.181	301.841	372.702	725.156	1452.68	1497.19	316.065	465.014	519.712
2419	829.658	3	2485.95	49.0197	0.668567	3.1856	B5XJR1	Elongation factor G OS=Streptococcus pyogenes serotype M49 (strain NZ131) OX=471876 GN=fusA PE=3 SV=1	IGETHEGASQMDWMEQEQER					0						IGETHEGASQMDWMEQEQER	[9] Phospho (STY)|[11] Oxidation (M)	6.7362	-0.282651	3	GETHEGASQMDWMEQ	S	48								2613.72	253.29	3380.81	1382.13	976.186	710.499	1824.38	3108.7	2283.3	3276.52	4922.01	4752.65	2614.18	2977.13	2875.5
2422	1152.52	2	2303.02	64.0073	0.784017	6.5097	A0A0H3BYW2	EIICB-Lac OS=Streptococcus pyogenes serotype M49 (strain NZ131) OX=471876 GN=lacE PE=4 SV=1	VYDEQILAEEAAGTNSSDALK	VYDEQILAEEAAGTNSSDALK	[17] Phospho (STY)	68.51	-1.019	9	80.13	50.9756	EAAGTNSSDALKEKV	S	428	VYDEQILAEEAAGTNSSDALK	[16] Phospho (STY)	7.0328	-1.02922	7	EEAAGTNSSDALKEK	S	427								1218.64	2858.2	1978.21	1047.14	891.64	668.445	517.808	1053.14	838.188	8753.98	13128.2	11245	2703.66	2447.26	2242.15
2427	620.786	2	1239.56	42.076	1.00913	3.3241	B5XKR6	30S ribosomal protein S21 OS=Streptococcus pyogenes serotype M49 (strain NZ131) OX=471876 GN=rpsU PE=3 SV=1	KNESLDDALR	KNESLDDALR	[4] Phospho (STY)	42.77	6.12011	3	100	100	TVVRKNESLDDALRR	S	11					0											473.385	1185.74	803.596	1082.19	1102.77	791.443	252.156	557.481	530.673	1065.92	1577.24	1442.68	649.447	790.943	677.089
2437	629.551	4	2514.18	48.1666	0.422883	2.97784	A0A0H3BZR7	Mid-cell-anchored protein Z OS=Streptococcus pyogenes serotype M49 (strain NZ131) OX=471876 GN=mapZ PE=3 SV=1	SEESKEVEVTKESQTLGLNEAK	SEESKEVEVTKESQTLGLNEAK	[10] Phospho (STY)	69.2	0.52603	5	99.32	97.334	ESKEVEVTKESQTLG	T	11					0											2861.7	4426.34	4164.15	2634.01	2495.4	3481.97	2809.64	3982.13	4205.41	253.286	456.331	809.196	3110.53	5162.92	5599.53
2440	805.389	2	1608.76	67.9628	1.07088	4.43213	A0A0H3C2K4	Alkyl hydroperoxide reductase C OS=Streptococcus pyogenes serotype M49 (strain NZ131) OX=471876 GN=ahpC PE=3 SV=1	EGAETLTPSLDLVGK	EGAETLTPSLDLVGK	[9] Phospho (STY)	40.32	-0.337472	2	96.17	95.9	GAETLTPSLDLVGKI	S	179	EGAETLTPSLDLVGK	[9] Phospho (STY)	7.3814	-0.28994	6	GAETLTPSLDLVGKI	S	179								474.891	1130.85	731.774	1160.07	1151.35	1161.65	290.885	728.932	652.902	3460.5	6027.74	6404.78	532.137	942.001	815.478
2454	985.457	2	1968.9	49.5243	0.566	5.40166	A0A0H3C2S7	Uncharacterized protein OS=Streptococcus pyogenes serotype M49 (strain NZ131) OX=471876 GN=Spy49_1801c PE=4 SV=1	LLSHQSMGYGQPLEVSK	LLSHQSMGYGQPLEVSK	[6] Phospho (STY)|[7] Oxidation (M)	54.01	-1.00327	12	95.58	62.9492	EKLLSHQSMGYGQPL	S	110	LLSHQSMGYGQPLEVSK	[6] Phospho (STY)|[7] Oxidation (M)	7.4591	-1.01523	7	EKLLSHQSMGYGQPL	S	110								3663.9	15028.6	5957.09	1509.04	1697.93	1162.83	1344.39	3363.68	1797.11	387.429	896.431	641.921	4422.49	5065.23	3868.08
2471	533.271	2	1064.53	26.5739	0.4637	2.63158	B5XJ36	50S ribosomal protein L3 OS=Streptococcus pyogenes serotype M49 (strain NZ131) OX=471876 GN=rplC PE=3 SV=1	EVLSNKPAK	EVLSNKPAK	[4] Phospho (STY)	34.27	1.12216	2	100	100	DDKREVLSNKPAKGH	S	61					0											103.653	349.383	264.906	365.949	304.746	318.141	71.7817	221.964	181.416	268.157	593.862	555.03	149.57	305.317	222.252
2474	893.909	2	1785.8	39.9553	0.586467	4.77839	A0A0H3BXI0	Uncharacterized protein OS=Streptococcus pyogenes serotype M49 (strain NZ131) OX=471876 GN=Spy49_1001c PE=3 SV=1	LKDTISDTVNSDEAAK	LKDTISDTVNSDEAAK	[11] Phospho (STY)	58.87	-0.280385	8	99.84	95.8212	TISDTVNSDEAAK--	S	157	LKDTISDTVNSDEAAK	[11] Phospho (STY)	8.3273	-0.293562	21	TISDTVNSDEAAK--	S	157								439.886	1054.47	727.491	980.57	861.713	631.781	445.068	995.41	625.782	2830.07	5206.85	3339.97	910.762	1081.09	795.594
2476	853.408	2	1704.8	41.1283	0.361233	4.84765	A0A0H3BYA0	PTS system_ IIB component_ putative OS=Streptococcus pyogenes serotype M49 (strain NZ131) OX=471876 GN=Spy49_1328c PE=4 SV=1	ILAACGAGVNSSHQIK	ILAACGAGVNSSHQIK	[5] Carbamidomethyl (C)|[11] Phospho (STY)	93.31	-0.273891	8	95.48	85.7638	ACGAGVNSSHQIKDA	S	14	ILAACGAGVNSSHQIK	[5] Carbamidomethyl (C)|[11] Phospho (STY)	7.8621	-0.287695	4	ACGAGVNSSHQIKDA	S	14								1275.78	2014.54	1708.98	290.804	299.997	179.735	1254.16	2268.31	1479.96	3178.11	5847.48	3771.76	1264.04	1264.5	927.698
2506	519.791	2	1037.57	52.9538	0.545517	2.77008	B5XI03	GTP-sensing transcriptional pleiotropic repressor CodY OS=Streptococcus pyogenes serotype M49 (strain NZ131) OX=471876 GN=codY PE=3 SV=1	KITSILQR	KITSILQR	[4] Phospho (STY)	43.13	3.1964	3	92.14	91.0867	EKTRKITSILQRSVD	S	13					0				KITSILQR	[4] Phospho (STY)	72.384	3.15104	EKTRKITSILQRSVD	S	13	48.8347	176.464	119.895	442.417	229.45	429.006	9.02502	90.0137	67.477	305.775	527.732	549.096	107.393	193.402	171.021
2530	666.293	2	1330.57	22.557	0.409767	3.60111	A0A0H3BZL9	PTS system_ fructose-specific IIABC component OS=Streptococcus pyogenes serotype M49 (strain NZ131) OX=471876 GN=fruA PE=4 SV=1	NGKSETAVSTEK	NGKSETAVSTEK	[1] Deamidation (N)|[4] Phospho (STY)	50.5	4.32245	2	99.44	99.01	YHAKNGKSETAVSTE	S	274					0				NGKSETAVSTEK	[1] Deamidation (N)|[4] Phospho (STY)	55.0863	4.36224	YHAKNGKSETAVSTE	S	274	378.814	1285.53	1024.45	433.307	332.1	277.694	299.914	701.857	661.968	860.116	1656.13	1346.66	611.94	595.955	719.417
2533	977.972	2	1953.93	51.2149	0.4636	5.40166	A0A0H3BZR7	Mid-cell-anchored protein Z OS=Streptococcus pyogenes serotype M49 (strain NZ131) OX=471876 GN=mapZ PE=3 SV=1	EVEVTKESQTLGLNEAK	EVEVTKESQTLGLNEAK	[5] Phospho (STY)	73.5	0.368105	11	99.73	91.9936	ESKEVEVTKESQTLG	T	11	EVEVTKESQTLGLNEAK	[5] Phospho (STY)	8.0852	0.356061	26	ESKEVEVTKESQTLG	T	11								3289.5	5953	4664.21	1592.8	1486.41	1076.57	1821.87	4686.24	3154.56	327.911	713.782	410.715	2962.72	4170.22	3201.01
2534	739.793	2	1477.57	43.3443	0.525217	3.87812	A0A0H3BXY9	Isoleucine--tRNA ligase OS=Streptococcus pyogenes serotype M49 (strain NZ131) OX=471876 GN=ileS PE=3 SV=1	SYNAFVCDHSAK	SYNAFVCDHSAK	[1] Phospho (STY)|[7] Carbamidomethyl (C)	46.91	1.49439	6	100	99.89	DPTTRMRSYNAFVCD	S	888					0											443.338	914.838	733.642	784.424	687.982	504.005	235.17	459.414	315.984	4039.14	6817.81	5119.41	451.242	538.941	399.959
2536	514.928	3	1541.76	58.0136	0.484333	2.28532	B5XMJ7	Cell cycle protein GpsB OS=Streptococcus pyogenes serotype M49 (strain NZ131) OX=471876 GN=gpsB PE=3 SV=1	VAQSATNFDILKR	VAQSATNFDILKR	[6] Phospho (STY)	47.61	1.02152	2	76.06	63.03	TRVAQSATNFDILKR	T	86					0											2303.74	4007.27	2984.72	841.574	867.008	1110.3	1606.16	2617.96	2693.5	331.719	605.267	713.457	3227.7	4634.8	4535.89
2554	951.939	2	1901.86	49.4423	0.463617	5.12465	B5XKG9	Lysine--tRNA ligase OS=Streptococcus pyogenes serotype M49 (strain NZ131) OX=471876 GN=lysS PE=3 SV=1	SNQHIEELNDQQIVR	SNQHIEELNDQQIVR	[1] Phospho (STY)	105.15	0.0181794	24	100	100	------MSNQHIEEL	S	2	SNQHIEELNDQQIVR	[1] Phospho (STY)	6.9145	0.00580567	30	------MSNQHIEEL	S	2								2296.96	4255.65	3370.14	2893.78	2546.35	1487.57	2391.49	4101.79	3216.75	1710.73	3327.32	2319.77	1695.98	1889.82	1553.86
2556	495.723	2	989.432	35.4536	0.76365	2.49307	A0A0H3BWD6	Phosphoribosylaminoimidazole-succinocarboxamide synthase OS=Streptococcus pyogenes serotype M49 (strain NZ131) OX=471876 GN=purC PE=3 SV=1	NVTAGSFSK	NVTAGSFSK	[6] Phospho (STY)	37.76	10.2576	2	99.03	94.885	LRNVTAGSFSKRFGV	S	109					0											744.103	1991.63	1520.76	4746.46	4119.81	3984.86	549.842	987.683	1017.47	516.603	1073.7	1026.59	961.448	1287.88	1177.88
2571	814.377	2	1626.74	42.117	0.82485	4.63989	A0A0H3BYW3	Uncharacterized protein OS=Streptococcus pyogenes serotype M49 (strain NZ131) OX=471876 GN=Spy49_0908 PE=4 SV=1	VEGIGEATSQTIQSK	VEGIGEATSQTIQSK	[8] Phospho (STY)	62.32	-6.0701	13	97.7	92.1492	VEGIGEATSQTIQSK	T	110	VEGIGEATSQTIQSK	[8] Phospho (STY)	7.022	-6.0231	3	VEGIGEATSQTIQSK	T	110								2355.95	4245.92	3388.71	2595.17	2987.49	1962.79	1116.45	2168.37	1547.51	757.957	1618.48	950.142	2347.6	2982.72	2230.46
2608	1366.61	3	4096.82	62.6574	0.90675	5.88643	A0A0H3BZ18	Cell-division initiation protein OS=Streptococcus pyogenes serotype M49 (strain NZ131) OX=471876 GN=divIVA PE=4 SV=1	RVDESNKELEAYQLDSQSDSTTEPEVNLSETQTFK	RVDESNKELEAYQLDSQSDSTTEPEVNLSETQTFK	[31] Phospho (STY)	164.59	-2.70177	3	98.03	71.39	PEVNLSETQTFKLNI	T	245	RVDESNKELEAYQLDSQSDSTTEPEVNLSETQTFK	[31] Phospho (STY)	7.6682	-2.68311	9	PEVNLSETQTFKLNI	T	245								620.498	875.995	393.989	2305.55	1446.86	3381.63	245.718	346.438	1304.87	0	0	5.45538	29628.5	23884.2	31208.6
2616	814.382	2	1626.75	44.6201	0.689067	4.36288	A0A0H3BYW3	Uncharacterized protein OS=Streptococcus pyogenes serotype M49 (strain NZ131) OX=471876 GN=Spy49_0908 PE=4 SV=1	VEGIGEATSQTIQSK					0						VEGIGEATSQTIQSK	[9] Phospho (STY)	7.2427	-1.01528	3	EGIGEATSQTIQSKM	S	111	VEGIGEATSQTIQSK	[9] Phospho (STY)	42.7288	-1.09122	EGIGEATSQTIQSKM	S	111	626.15	1249.07	1077.55	893.902	942.092	713.807	1411.19	2226.99	1958.55	2065.14	3514.85	3151.92	1153.63	1446.36	1371.92
2617	595.906	3	1784.7	20.3	0.525033	2.63158	B5XJ39	50S ribosomal protein L2 OS=Streptococcus pyogenes serotype M49 (strain NZ131) OX=471876 GN=rplB PE=3 SV=1	GSVMNPNDHPHGGGEGK	GSVMNPNDHPHGGGEGK	[2] Phospho (STY)|[4] Oxidation (M)	34.19	0.710763	2	100	100	IRPTVRGSVMNPNDH	S	223					0				GSVMNPNDHPHGGGEGK	[2] Phospho (STY)|[4] Oxidation (M)	34.2149	0.727237	IRPTVRGSVMNPNDH	S	223	60.87	913.729	224.314	66.2488	101.738	131.733	30.194	198.519	120.42	110.59	279.112	274.549	20.9362	89.0638	89.3304
2626	736.842	2	1471.67	47.2595	0.6612	3.80886	A0A0H3BYE4	Signal recognition particle protein OS=Streptococcus pyogenes serotype M49 (strain NZ131) OX=471876 GN=ffh PE=3 SV=1	IAAGSGNSFVEVNK	IAAGSGNSFVEVNK	[8] Phospho (STY)	45.27	-0.536823	3	93.76	91.8433	IAAGSGNSFVEVNKF	S	409	IAAGSGNSFVEVNK	[8] Phospho (STY)	6.4012	-0.552813	2	IAAGSGNSFVEVNKF	S	409	IAAGSGNSFVEVNK	[8] Phospho (STY)	36.8629	-0.568804	IAAGSGNSFVEVNKF	S	409	1016.5	1914.45	1592.26	1027.91	1047.56	944.542	735.373	1281.25	1126.18	2206.8	3724.12	3138.26	1071.93	1453.08	1326.18
2629	988.107	3	2961.3	47.3004	0.96835	4.15512	A0A0H3BZJ8	Cell division protein FtsA OS=Streptococcus pyogenes serotype M49 (strain NZ131) OX=471876 GN=ftsA PE=3 SV=1	RPESTIGYEQQASQTAYDSQVPSDPK					0						RPESTIGYEQQASQTAYDSQVPSDPK	[17] Phospho (STY)	7.3092	-1.14851	4	QQASQTAYDSQVPSD	Y	429								5486.27	9558.97	8485.72	2967.54	2518.95	2381.72	4379.13	6918.64	6139.8	5524.12	8724.8	8314.57	6391.1	7445.36	7156.47
2646	951.421	2	1900.83	52.7081	0.742917	5.19391	B5XJR1	Elongation factor G OS=Streptococcus pyogenes serotype M49 (strain NZ131) OX=471876 GN=fusA PE=3 SV=1	VYSGVLNSGSYVMNTSK					0										0				VYSGVLNSGSYVMNTSK	[10] Phospho (STY)|[13] Oxidation (M)	50.8602	-0.0553597	SGVLNSGSYVMNTSK	S	338	297.542	2964.05	938.509	1801.84	1498.73	1222.95	384.151	1394.92	891.417	1309.77	2642.76	2005.43	403.135	605.584	661.669
2652	708.788	2	1415.56	40.7801	0.620167	3.4626	B5XKI1	Elongation factor Tu OS=Streptococcus pyogenes serotype M49 (strain NZ131) OX=471876 GN=tuf PE=3 SV=1	DYASIDAAPEER	DYASIDAAPEER	[2] Phospho (STY)	51.7	0.960254	8	100	99.9537	SVNQPKDYASIDAAP	Y	50	DYASIDAAPEER	[2] Phospho (STY)	7.9513	0.94363	9	SVNQPKDYASIDAAP	Y	50								1674.1	2308.95	2165.92	1571.04	1865.5	1225.84	1231.44	1774.79	1580.29	1870.99	3234.63	2770.46	1462.99	1901.45	1785.4
2688	463.723	2	925.431	42.7575	1.23472	2.35457	A0A0H3C281	50S ribosomal protein L13 OS=Streptococcus pyogenes serotype M49 (strain NZ131) OX=471876 GN=rplM PE=3 SV=1	SITAGELR	SITAGELR	[1] Phospho (STY)	41.76	4.53615	2	97.15	80.79	MYPGGLKSITAGELR	S	88					0				SITAGELR	[3] Phospho (STY)	75.5444	4.48529	PGGLKSITAGELRSK	T	90	900.092	1259.51	1491.44	3661.07	3247.08	3383.05	728.863	1315.51	1410.21	1432.94	2524.39	2492.32	842.84	1366.47	1333.37
2705	586.594	3	1756.76	41.7893	0.463617	3.53186	A0A0H3BYW2	EIICB-Lac OS=Streptococcus pyogenes serotype M49 (strain NZ131) OX=471876 GN=lacE PE=4 SV=1	EYGAPVTAAAGSYGAHR					0						EYGAPVTAAAGSYGAHR	[2] Phospho (STY)	6.4474	1.02026	7	LNKAAKEYGAPVTAA	Y	489								858.306	1638.8	1287.09	555.316	434.081	486.143	468.47	735.542	629.389	3064.92	4609.4	4487.81	1048.05	1406.49	1368.19
2714	824.326	3	2469.96	57.3522	0.504833	3.1856	B5XJR1	Elongation factor G OS=Streptococcus pyogenes serotype M49 (strain NZ131) OX=471876 GN=fusA PE=3 SV=1	IGETHEGASQMDWMEQEQER	IGETHEGASQMDWMEQEQER	[9] Phospho (STY)	48.07	-0.638944	7	71.24	54.1671	GETHEGASQMDWMEQ	S	48	IGETHEGASQMDWMEQEQER	[4] Phospho (STY)	7.4697	-0.648472	8	KIHKIGETHEGASQM	T	43								1119.81	4.23795	1131.26	437.502	317.232	140.506	1390.42	1318.93	1519.77	3602.83	5192.91	4388.04	1409.07	1387.82	1237.4
2725	804.845	2	1607.68	31.1979	0.525217	4.15512	B5XJR1	Elongation factor G OS=Streptococcus pyogenes serotype M49 (strain NZ131) OX=471876 GN=fusA PE=3 SV=1	VDGMEAHGNSQIVR	VDGMEAHGNSQIVR	[4] Oxidation (M)|[10] Phospho (STY)	61.78	-0.62488	6	100	100	GMEAHGNSQIVRAYV	S	638	VDGMEAHGNSQIVR	[4] Oxidation (M)|[10] Phospho (STY)	7.476	-0.639518	4	GMEAHGNSQIVRAYV	S	638	VDGMEAHGNSQIVR	[4] Oxidation (M)|[10] Phospho (STY)	47.2263	-0.668793	GMEAHGNSQIVRAYV	S	638	274.53	2560.28	717.541	386.553	439.68	380.472	269.802	929.978	526.905	1242.71	2727.36	1988.53	682.384	836.17	724.311
2727	562.317	2	1122.62	42.117	0.60695	2.97784	B5XLE2	50S ribosomal protein L10 OS=Streptococcus pyogenes serotype M49 (strain NZ131) OX=471876 GN=rplJ PE=3 SV=1	VIKNSILTR	VIKNSILTR	[5] Phospho (STY)	39.13	2.59851	3	99.82	99.4633	EFKVIKNSILTRAAE	S	59					0											6.99385	20.6234	22.0655	129.677	154.215	156.66	7.39951	10.1808	13.065	8.1415	25.694	29.2792	6.53877	9.02758	14.4589
2733	722.829	2	1443.64	36.5042	0.6071	3.80886	A0A0H3BZ43	Uncharacterized protein OS=Streptococcus pyogenes serotype M49 (strain NZ131) OX=471876 GN=Spy49_1003c PE=3 SV=1	VSLQDKVSDMAR	VSLQDKVSDMAR	[8] Phospho (STY)|[10] Oxidation (M)	45.46	-0.172248	6	99.98	99.9517	VSLQDKVSDMARSTF	S	141	VSLQDKVSDMAR	[8] Phospho (STY)|[10] Oxidation (M)	7.2401	-0.11928	2	VSLQDKVSDMARSTF	S	141								215.2	2244.96	774.447	1247.12	1431.1	438.613	383.151	795.076	613.733	1812.75	3623.12	2473.91	74.2728	686.669	662.436
2765	533.219	2	1064.42	31.2184	1.51412	2.63158	A0A0H3C049	Spi SpeB protease inhibitor OS=Streptococcus pyogenes serotype M49 (strain NZ131) OX=471876 GN=Spy49_1689c PE=4 SV=1	SMIEAYQK	SMIEAYQK	[1] Phospho (STY)|[2] Oxidation (M)	53.75	-0.998654	2	100	100	LNHDNVRSMIEAYQK	S	88					0											1211.68	5876.42	3444.11	3114.86	2415.16	2563.47	4465.23	9560.5	9100.98	12741.3	19260.8	20562.8	1487.03	3174.8	2319.03
2793	679.769	2	1357.52	36.886	0.607267	3.60111	B5XHZ0	Chaperone protein DnaK OS=Streptococcus pyogenes serotype M49 (strain NZ131) OX=471876 GN=dnaK PE=3 SV=1	AAQESGNLDDMK	AAQESGNLDDMK	[5] Phospho (STY)	58.45	1.11436	5	100	100	ELKAAQESGNLDDMK	S	548	AAQESGNLDDMK	[5] Phospho (STY)	7.6643	1.09702	5	ELKAAQESGNLDDMK	S	548								351.845	45.4029	487.014	452.671	506.156	356.842	305.213	511.592	494.814	2337.43	3533.47	3560.43	657.446	648.965	570.1
2806	413.208	3	1236.6	23.2255	0.525183	2.00831	B5XJ52	50S ribosomal protein L18 OS=Streptococcus pyogenes serotype M49 (strain NZ131) OX=471876 GN=rplR PE=3 SV=1	GKLSGTADRPR					0										0				GKLSGTADRPR	[4] Phospho (STY)	31.7149	3.56199	RRVRGKLSGTADRPR	S	23	156.415	267.363	243.878	112.716	97.9292	98.8946	115.082	217.902	168.022	721.558	1287.77	1235.01	136.955	190.895	204.431
2811	528.915	3	1583.72	46.8161	0.702217	2.28532	A0A0H3BWH3	Putative calcium-transporting ATPase OS=Streptococcus pyogenes serotype M49 (strain NZ131) OX=471876 GN=pacL PE=4 SV=1	DLSTAVSKDAGIGDR	DLSTAVSKDAGIGDR	[7] Phospho (STY)	51.57	1.68125	2	99.61	98.695	KDLSTAVSKDAGIGD	S	190					0											1488.97	1986.77	2295.92	1204.5	901.344	1187.81	1104.84	1607.02	1752.92	2966.95	4513.96	5275.66	2294.41	3418.24	3319.72
2826	706.838	2	1411.66	40.0986	0.443133	3.73961	A0A0H3BWF1	Protein translocase subunit SecY OS=Streptococcus pyogenes serotype M49 (strain NZ131) OX=471876 GN=secY PE=3 SV=1	NSSYIPSVRPGR	NSSYIPSVRPGR	[4] Phospho (STY)	37.67	0.34972	2	99.96	99.94	NLQKNSSYIPSVRPG	Y	347					0											44.7968	363.343	239.981	225.859	148.537	83.501	40.0397	247.21	200.99	462.149	1008.19	637.624	203.802	240.996	189.781
2838	495.246	2	988.477	60.762	0.6815	2.49307	A0A0H3BYQ9	PTS system, IIB component OS=Streptococcus pyogenes serotype M49 (strain NZ131) OX=471876 GN=Spy49_0834 PE=4 SV=1	VHLSQLVN	VHLSQLVN	[4] Phospho (STY)	33.92	2.7701	9	100	100	SNTKVHLSQLVN---	S	159					0											594.539	1352.07	1065.31	376.122	318.5	408.108	499.316	879.265	767.603	2219.46	3622.92	3961.27	845.719	1279.2	1179.26
2846	451.229	2	900.443	67.7653	0.6275	2.28532	A0A0H3BWE7	Alcohol dehydrogenase OS=Streptococcus pyogenes serotype M49 (strain NZ131) OX=471876 GN=adhP PE=3 SV=1	KVLDFIS	KVLDFIS	[7] Phospho (STY)	38.66	7.65505	2	100	100	RKVLDFIS-------	S	338					0											874.61	1253.51	1138.42	733.528	555.93	602.091	495.191	1156.5	1069.09	2588.04	4149.49	5302.57	579.226	1147.89	1152.79
2863	685.805	2	1369.6	57.0859	0.58675	3.4626	A0A0H3BYM9	Glyceraldehyde-3-phosphate dehydrogenase OS=Streptococcus pyogenes serotype M49 (strain NZ131) OX=471876 GN=plr PE=3 SV=1	NVSVDEINAAMK	NVSVDEINAAMK	[3] Phospho (STY)	52.42	0.535193	3	100	100	VTLDKNVSVDEINAA	S	255	NVSVDEINAAMK	[3] Phospho (STY)	7.6286	0.518011	4	VTLDKNVSVDEINAA	S	255								306.79	78.7521	408.654	330.269	176.193	242.368	263.918	390.122	305.174	2661.36	3127.11	3767.93	330.338	587.691	667.215
2872	679.29	2	1356.57	47.5668	0.812117	3.60111	A0A0H3C002	Uncharacterized protein OS=Streptococcus pyogenes serotype M49 (strain NZ131) OX=471876 GN=Spy49_1390c PE=4 SV=1	LMDSDTIETPR	LMDSDTIETPR	[6] Phospho (STY)	58.79	1.75359	2	99.53	93.895	HRLMDSDTIETPRSY	T	308					0											1726.56	851.626	2877.54	999.648	931.524	792.071	1608.69	2462.48	2387.29	986.992	1774.09	1689.26	2233.2	3215.16	2928.22
2885	982.478	2	1962.94	65.7057	0.70935	5.47091	B5XK64	Ribosome-recycling factor OS=Streptococcus pyogenes serotype M49 (strain NZ131) OX=471876 GN=frr PE=3 SV=1	ALNASDLGITPANDGSVIR					0						ALNASDLGITPANDGSVIR	[16] Phospho (STY)	6.7078	0.209061	6	ITPANDGSVIRLVIP	S	96	ALNASDLGITPANDGSVIR	[16] Phospho (STY)	64.8971	0.146128	ITPANDGSVIRLVIP	S	96	375.495	845.623	664.401	425.755	392.038	180.355	241.334	560.283	359.151	4098.98	7197.74	5792.78	592.539	753.894	561.685
2889	528.238	3	1581.69	46.2499	1.05057	2.56233	A0A0H3BXD5	30S ribosomal protein S12 OS=Streptococcus pyogenes serotype M49 (strain NZ131) OX=471876 GN=rpsL PE=3 SV=1	SDSPALNIGYNSHK	SDSPALNIGYNSHK	[3] Phospho (STY)	52.39	6.00291	2	93.95	71.975	SKIEKSDSPALNIGY	S	39					0											1151.54	1671.68	1872.74	1465.13	1389.66	1459.29	907.648	1625.1	1413.24	893.462	1622.18	1686.4	1376.8	1986.81	1997.25
2894	493.532	3	1477.57	43.3443	0.5588	2.28532	A0A0H3BXY9	Isoleucine--tRNA ligase OS=Streptococcus pyogenes serotype M49 (strain NZ131) OX=471876 GN=ileS PE=3 SV=1	SYNAFVCDHSAK	SYNAFVCDHSAK	[1] Phospho (STY)|[7] Carbamidomethyl (C)	46.91	2.82827	6	100	99.8833	DPTTRMRSYNAFVCD	S	888					0											544.985	895.034	792.421	669.49	574.106	715.256	364.936	452.222	448.618	3642.55	5358.25	6030.93	479.18	754.787	782.029
2909	637.287	2	1272.56	26.2536	0.525233	3.39335	B5XLR6	30S ribosomal protein S20 OS=Streptococcus pyogenes serotype M49 (strain NZ131) OX=471876 GN=rpsT PE=3 SV=1	AASSSIDKAESK	AASSSIDKAESK	[4] Phospho (STY)	73.9	0.457902	2	87.76	68.36	ELFRAASSSIDKAES	S	49					0				AASSSIDKAESK	[4] Phospho (STY)	35.4741	0.420917	ELFRAASSSIDKAES	S	49	144.569	578.464	406.932	119.789	101.812	87.7602	106.2	303.112	221.709	353.928	922.71	736.217	242.168	426.504	390.964
2919	399.869	3	1196.58	28.8513	0.443317	2.00831	A0A0H3C1S0	CsbD domain-containing protein OS=Streptococcus pyogenes serotype M49 (strain NZ131) OX=471876 GN=Spy49_1665c PE=3 SV=1	SKIEQASGGLK	SKIEQASGGLK	[7] Phospho (STY)	53.98	3.53819	28	100	99.8396	KSKIEQASGGLKEGA	S	14	SKIEQASGGLK	[7] Phospho (STY)	7.6174	3.51852	17	KSKIEQASGGLKEGA	S	14								546.621	956.66	982.151	833.987	862.272	1277.6	561.124	787.414	1036.62	439.258	755.899	1332	252.6	525.488	624.116
2926	513.767	2	1025.52	57.9391	0.5867	2.63158	B5XJ99	30S ribosomal protein S4 OS=Streptococcus pyogenes serotype M49 (strain NZ131) OX=471876 GN=rpsD PE=3 SV=1	LGLSLTGTGK	LGLSLTGTGK	[4] Phospho (STY)	71.37	3.93929	3	99.97	98.7467	QSRRLGLSLTGTGKE	S	18					0											351.358	659.273	556.554	203.899	263.91	268.536	103.239	280.473	251.027	158.44	394.752	464.954	398.484	529.354	578.745
2946	547.248	3	1638.72	26.9147	0.668467	2.56233	B5XJH8	Adenylosuccinate synthetase OS=Streptococcus pyogenes serotype M49 (strain NZ131) OX=471876 GN=purA PE=3 SV=1	EVGHEYGTTTGRPR					0										0				EVGHEYGTTTGRPR	[10] Phospho (STY)	23.5227	4.57744	GHEYGTTTGRPRRVG	T	300	311.816	885.832	662.523	749.734	713.147	669.403	259.979	665.983	593.39	280.104	637.211	701.136	440.546	678.984	558.112
2955	746.334	3	2235.98	63.5846	0.545517	3.25485	A0A0H3BZ23	Cell division protein FtsZ OS=Streptococcus pyogenes serotype M49 (strain NZ131) OX=471876 GN=ftsZ PE=3 SV=1	VISNHNQNQGSAFGNWDLR					0						VISNHNQNQGSAFGNWDLR	[3] Phospho (STY)	7.0545	-0.451609	9	PSAQKVISNHNQNQG	S	383								928.169	684.066	1340.63	938.965	749.941	570.493	785.644	1450.14	1183.65	2321.63	4341.68	4407.6	1196.76	1652.74	1491.05
2957	675.843	2	1349.67	63.2234	0.824833	3.53186	A0A0H3BVE1	30S ribosomal protein S5 OS=Streptococcus pyogenes serotype M49 (strain NZ131) OX=471876 GN=rpsE PE=3 SV=1	SLGSNTPINIVR	SLGSNTPINIVR	[4] Phospho (STY)	65.49	0.866976	3	99.56	96.61	ITSKSLGSNTPINIV	S	129	SLGSNTPINIVR	[4] Phospho (STY)	7.6315	0.84954	3	ITSKSLGSNTPINIV	S	129								455.815	1051.28	945.484	2239.07	1913.78	1928.86	294.353	620.622	548.429	636.526	1342	1441.61	353.964	657.229	465.72
2985	671.945	3	2012.81	50.8332	0.286683	2.83934	B5XJR1	Elongation factor G OS=Streptococcus pyogenes serotype M49 (strain NZ131) OX=471876 GN=fusA PE=3 SV=1	LYDGSYHDVDSSETAFK					0						LYDGSYHDVDSSETAFK	[11] Phospho (STY)	7.2544	4.25596	2	GSYHDVDSSETAFKI	S	575								154.294	822.139	391.95	42.7117	9.02777	95.0996	125.966	224.902	215.055	805.703	871.779	1002.7	264.767	485.079	278.937
3006	629.283	2	1256.55	49.0197	0.668583	3.3241	B5XIW7	60 kDa chaperonin OS=Streptococcus pyogenes serotype M49 (strain NZ131) OX=471876 GN=groL PE=3 SV=1	DATMTALGQAAK	DATMTALGQAAK	[5] Phospho (STY)	35.53	3.04066	4	98.91	95.925	ELKDATMTALGQAAK	T	313	DATMTALGQAAK	[5] Phospho (STY)	7.7891	3.10151	3	ELKDATMTALGQAAK	T	313								470.35	444.453	848.586	1708.71	1027.03	1271.78	544.043	909.267	855.039	1941.38	3051.16	3133.96	731.688	1113.06	1128.49
3023	719.886	2	1437.76	39.9553	0.463617	4.08587	A0A0H3C1S0	CsbD domain-containing protein OS=Streptococcus pyogenes serotype M49 (strain NZ131) OX=471876 GN=Spy49_1665c PE=3 SV=1	LKSKIEQASGGLK	LKSKIEQASGGLK	[3] Phospho (STY)	79.56	-0.654219	6	100	99.9717	MSEEKLKSKIEQASG	S	8	LKSKIEQASGGLK	[3] Phospho (STY)	7.5544	-0.670587	7	MSEEKLKSKIEQASG	S	8								7.6629	591.654	401.812	353.088	387.066	218.436	0	318.436	188.609	269.363	569.522	336.77	564.181	689.527	542.266
3064	577.296	2	1152.58	38.0184	0.627717	2.97784	B5XJR1	Elongation factor G OS=Streptococcus pyogenes serotype M49 (strain NZ131) OX=471876 GN=fusA PE=3 SV=1	SVQEEIIKK	SVQEEIIKK	[1] Phospho (STY)	30.69	-1.36313	2	100	100	HYEDVPKSVQEEIIK	S	680					0											419.209	599.026	492.482	379.609	365.731	334.912	427.756	806.608	764.025	861.841	1363.19	1250.14	319.562	414.812	404.403
3066	468.709	2	935.404	38.2775	0.607233	2.21607	A0A0H3BXF8	Putative sugar ABC transporter OS=Streptococcus pyogenes serotype M49 (strain NZ131) OX=471876 GN=Spy49_0973c PE=4 SV=1	SVSFTTSK	SVSFTTSK	[1] Phospho (STY)	28.53	4.19809	3	96.01	93.85	AEMMVGRSVSFTTSK	S	241					0											507.965	919.576	833.598	483.68	467.206	399.806	402.148	579.598	588.745	1808.24	2997.69	2731.42	535.306	775.779	676.991
3069	750.824	4	2999.27	68.8566	0.52525	3.73961	A0A0H3BZC1	Uncharacterized protein OS=Streptococcus pyogenes serotype M49 (strain NZ131) OX=471876 GN=Spy49_0377 PE=4 SV=1	METFESDDAVDFDTKVMTLPEKDEK	METFESDDAVDFDTKVMTLPEKDEK	[14] Phospho (STY)	27.19	-0.607987	2	84.49	83.615	DDAVDFDTKVMTLPE	T	30					0											1506.99	462.745	1131.79	1665.26	1006.65	1646.77	1361.24	1723.59	2772.4	137.535	269.357	570.759	7595.48	11032.3	13255.5
3080	656.298	3	1965.87	49.9674	0.402183	3.1856	A0A0H3BXI0	Uncharacterized protein OS=Streptococcus pyogenes serotype M49 (strain NZ131) OX=471876 GN=Spy49_1001c PE=3 SV=1	VTSAASSTSQFVSEQTEK	VTSAASSTSQFVSEQTEK	[3] Phospho (STY)	81.45	7.62572	11	59.64	53.1418	TVQDRVTSAASSTSQ	S	131	VTSAASSTSQFVSEQTEK	[2] Phospho (STY)	8.6148	7.61375	15	VTVQDRVTSAASSTS	T	130								1037.02	1071.39	967.019	950.542	500.289	1045.97	767.525	1208.49	1133.85	1836.82	2356.25	5028.51	1214.27	1419.36	1890.61
3081	492.245	2	982.476	54.5086	0.688867	2.42382	A0A0H3BVR1	Amino acid ABC transporter_ ATP-binding protein OS=Streptococcus pyogenes serotype M49 (strain NZ131) OX=471876 GN=Spy49_0236c PE=4 SV=1	SNSIIEIK	SNSIIEIK	[1] Phospho (STY)	54.8	2.6261	3	97.89	95.1133	------MSNSIIEIK	S	2					0											450.532	943.609	729.422	569.099	817.312	691.292	540.496	1126.7	1135.95	1667.74	2683.52	2840.41	590.399	957.285	895.43
3087	740.304	2	1478.59	46.8982	0.681733	3.80886	B5XIW7	60 kDa chaperonin OS=Streptococcus pyogenes serotype M49 (strain NZ131) OX=471876 GN=groL PE=3 SV=1	SQLETTTSDFDR	SQLETTTSDFDR	[8] Phospho (STY)	33.22	1.11396	2	46.34	40.32	SQLETTTSDFDREKL	S	356	SQLETTTSDFDR	[8] Phospho (STY)	7.976	1.09805	3	SQLETTTSDFDREKL	S	356								268.155	1151.65	673.284	796.891	853.96	926.709	498.445	935.368	842.373	1876.29	2939.1	2749.28	399.364	676.483	507.355
3094	826.394	2	1650.77	53.0898	0.545517	4.43213	A0A0H3BWH3	Putative calcium-transporting ATPase OS=Streptococcus pyogenes serotype M49 (strain NZ131) OX=471876 GN=pacL PE=4 SV=1	IEEAALTGESVPVEK	IEEAALTGESVPVEK	[10] Phospho (STY)	25.86	-0.678673	2	87.22	85.7	EAALTGESVPVEKDL	S	178	IEEAALTGESVPVEK	[10] Phospho (STY)	6.3233	-0.692929	7	EAALTGESVPVEKDL	S	178								1040.4	1935.36	1560.8	674.299	611.604	557.606	767.9	1853.11	1481.11	1008.36	1763.21	1669.16	1160.74	1580.51	1414.26
3095	746.333	3	2235.98	60.6186	0.681483	3.1856	A0A0H3BZ23	Cell division protein FtsZ OS=Streptococcus pyogenes serotype M49 (strain NZ131) OX=471876 GN=ftsZ PE=3 SV=1	VISNHNQNQGSAFGNWDLR					0						VISNHNQNQGSAFGNWDLR	[11] Phospho (STY)	7.0695	-1.36883	5	NHNQNQGSAFGNWDL	S	391								2508.45	1937.9	3321.44	2364.54	2072.51	2029.74	1769.5	2878.89	2186.87	2984.15	3553.98	3605.77	2703.03	3586.93	3311.28
3113	636.286	3	1905.84	51.2149	0.258833	3.11634	B5XKM7	Enolase OS=Streptococcus pyogenes serotype M49 (strain NZ131) OX=471876 GN=eno PE=3 SV=1	GMVPSGASTGEHEAVELR					0						GMVPSGASTGEHEAVELR	[9] Phospho (STY)	7.2915	3.88594	3	MVPSGASTGEHEAVE	T	43								316.238	183.766	234.28	362.745	560.418	556.314	102.003	136.697	233.087	976.399	637.755	766.107	187.39	336.057	258.527
3118	513.262	2	1024.51	35.0717	0.750517	2.63158	A0A0H3BYQ3	30S ribosomal protein S3 OS=Streptococcus pyogenes serotype M49 (strain NZ131) OX=471876 GN=rpsC PE=3 SV=1	GIKTQVSGR	GIKTQVSGR	[4] Phospho (STY)	53.55	2.50402	3	99.99	99.9233	AGAKGIKTQVSGRLN	T	141					0				GIKTQVSGR	[4] Phospho (STY)	79.2231	2.55568	AGAKGIKTQVSGRLN	T	141	62.433	270.725	170.509	980.411	768.796	636.117	41.4297	157.51	140.704	99.1176	266.382	226.232	153.544	193.957	189.642
3127	742.026	3	2223.06	84.5774	0.8252	3.67036	A0A0H3BZL9	PTS system_ fructose-specific IIABC component OS=Streptococcus pyogenes serotype M49 (strain NZ131) OX=471876 GN=fruA PE=4 SV=1	SQELISLILNNEGNTYHAK	SQELISLILNNEGNTYHAK	[6] Phospho (STY)	60.99	-0.209635	9	99.97	94.4878	KKSQELISLILNNEG	S	257	SQELISLILNNEGNTYHAK	[6] Phospho (STY)	6.9627	-0.220221	2	KKSQELISLILNNEG	S	257								751.883	1691.49	804.586	623.512	402.608	692.011	569.788	901.654	1131.61	1152.52	1833.93	3450.85	2723.2	3766.55	3669.18
3129	571.233	2	1140.45	25.5032	0.484133	2.83934	B5XKP7	ATP synthase subunit b OS=Streptococcus pyogenes serotype M49 (strain NZ131) OX=471876 GN=atpF PE=3 SV=1	DIDQAEQSR	DIDQAEQSR	[8] Phospho (STY)	35.58	5.1583	3	100	100	DIDQAEQSRLSAQQL	S	55					0											405.37	1675.22	1970.42	1031.14	1171.88	1178.08	310.192	1320.4	908.346	2841.21	3390.22	4938.76	928.533	1780.9	1064.37
3187	648.832	2	1295.65	32.9913	0.525283	3.53186	B5XJ52	50S ribosomal protein L18 OS=Streptococcus pyogenes serotype M49 (strain NZ131) OX=471876 GN=rplR PE=3 SV=1	GTKTEQAVVVGK	GTKTEQAVVVGK	[4] Phospho (STY)	42.41	1.27526	3	94.71	76.1133	DVSKGTKTEQAVVVG	T	69					0											212.233	884.649	563.079	713.875	598.056	482.833	140.715	305.269	339.39	215.74	584.477	415.907	388.263	463.141	473.445
3191	712.841	2	1423.67	29.1996	0.443367	3.80886	A0A0H3C1S0	CsbD domain-containing protein OS=Streptococcus pyogenes serotype M49 (strain NZ131) OX=471876 GN=Spy49_1665c PE=3 SV=1	IEQASGGLKEGAGK					0						IEQASGGLKEGAGK	[5] Phospho (STY)	7.5314	-1.67151	2	KSKIEQASGGLKEGA	S	14								483.313	1272.19	956.001	1188.83	1008.3	784.65	432.863	989.472	735.08	328.876	776.07	600.802	463.582	632.488	546.1
3201	983.423	2	1964.83	73.7399	0.68905	5.26316	A0A0H3BY92	Uncharacterized protein OS=Streptococcus pyogenes serotype M49 (strain NZ131) OX=471876 GN=Spy49_1318c PE=4 SV=1	ATTSSCPSPEAFLQAYR	ATTSSCPSPEAFLQAYR	[5] Phospho (STY)|[6] Carbamidomethyl (C)	38.37	-1.68664	3	30.77	28.9067	SSKATTSSCPSPEAF	S	64					0											225.579	980.346	783.001	441.271	379.146	292.831	585.865	1141.56	875.078	5688.95	10987.5	8206.9	487.991	615.17	446.938
3212	517.219	2	1032.42	46.5573	0.545783	2.56233	A0A0H3C0Z3	Uncharacterized protein OS=Streptococcus pyogenes serotype M49 (strain NZ131) OX=471876 GN=Spy49_1787c PE=4 SV=1	SDAFTDVAK	SDAFTDVAK	[1] Phospho (STY)	34.7	6.635	2	99.97	99.845	------MSDAFTDVA	S	2					0											1044.22	1885.95	1499.38	1582.18	1150.5	1262.77	808.324	1297.51	1300.9	629.798	1012.52	1009.33	1049.02	1322.85	1380.15
3298	700.324	2	1398.63	42.6961	0.579267	3.80886	A0A0H3BZ61	F420_ligase domain-containing protein OS=Streptococcus pyogenes serotype M49 (strain NZ131) OX=471876 GN=Spy49_0453 PE=4 SV=1	TEVIDSQGETIK					0						TEVIDSQGETIK	[6] Phospho (STY)	6.8329	3.84437	2	RKTEVIDSQGETIKF	S	189								85.2361	412.78	309.394	211.057	193.261	138.427	129.824	376.454	289.852	31.5731	127.901	98.7045	139.109	238.107	237.234
3314	904.394	1	903.387	34.1238	0.5866	7.82548	A0A0H3BZJ0	Formate acetyltransferase OS=Streptococcus pyogenes serotype M49 (strain NZ131) OX=471876 GN=pfl PE=3 SV=1	AYTSNIR	AYTSNIR	[4] Phospho (STY)	31.94	1.58773	7	90.3	85.3886	GIFRAYTSNIRRARH	S	155					0											3.19925	237.034	187.908	0	0	0	0	117.335	123.686	1371.57	3348.23	3075.42	26.3441	100.571	130.555
3332	912.481	2	1822.95	55.7766	0.607	5.26316	A0A0H3BY55	Non-specific serine/threonine protein kinase OS=Streptococcus pyogenes serotype M49 (strain NZ131) OX=471876 GN=Spy49_1257c PE=4 SV=1	KIIFEDVESTKPLPK	KIIFEDVESTKPLPK	[10] Phospho (STY)	81.93	-0.371169	18	86.05	62.735	IFEDVESTKPLPKVA	T	291	KIIFEDVESTKPLPK	[9] Phospho (STY)	7.009	-0.384079	6	IIFEDVESTKPLPKV	S	290								3591.28	4817.83	4034.67	870.092	1002.67	444.036	2041.82	4052.66	2114.64	473.302	963.654	472.38	2747.55	2806.1	1642.31
3356	616.29	2	1230.57	43.3648	0.558783	3.1856	B5XLE2	50S ribosomal protein L10 OS=Streptococcus pyogenes serotype M49 (strain NZ131) OX=471876 GN=rplJ PE=3 SV=1	SLRESGVEFK	SLRESGVEFK	[5] Phospho (STY)	28.42	1.15483	3	88.8	62.9333	LRRSLRESGVEFKVI	S	49					0											8.6702	57.2839	30.713	123.325	57.1517	133.186	8.29684	25.1174	14.231	142.251	257.618	222.049	2.52983	23.8261	23.678
3388	541.932	3	1622.77	56.1583	0.62765	2.83934	B5XMC3	Arginine deiminase OS=Streptococcus pyogenes serotype M49 (strain NZ131) OX=471876 GN=arcA PE=3 SV=1	TAQTPIHVYSEIGK					0						TAQTPIHVYSEIGK	[1] Phospho (STY)	7.5979	2.07035	6	------MTAQTPIHV	T	2								537.709	904.724	727.579	542.511	610.027	621.285	332.105	548.514	464.489	3569.99	5171.19	5788.63	567.789	935.149	844.418
3406	654.819	2	1307.62	52.9333	0.627433	3.4626	A0A0H3BYB9	Tagatose-6-phosphate kinase OS=Streptococcus pyogenes serotype M49 (strain NZ131) OX=471876 GN=fruK PE=3 SV=1	IDQINLGSVNR					0						IDQINLGSVNR	[8] Phospho (STY)	7.2367	-0.173842	2	IDQINLGSVNRMASD	S	24								381.35	874.595	657.981	618.095	590.627	745.052	170.387	427.043	386.017	1546.51	2351.69	2250.38	522.492	615.863	664.109
3421	514.898	3	1541.67	49.0402	0.825033	2.42382	B5XJ48	50S ribosomal protein L5 OS=Streptococcus pyogenes serotype M49 (strain NZ131) OX=471876 GN=rplE PE=3 SV=1	DFHGVPTKSFDGR					0						DFHGVPTKSFDGR	[9] Phospho (STY)	6.7126	3.91367	3	FHGVPTKSFDGRGNY	S	122	DFHGVPTKSFDGR	[7] Phospho (STY)	55.5443	3.88314	RDFHGVPTKSFDGRG	T	120	818.048	950.733	1039.09	1118.75	850.404	1418.26	425.237	626.758	572.84	284.145	508.37	616.594	711.507	952.964	869.848
3475	582.925	3	1745.75	31.1979	0.927517	2.70083	A0A0H3BZR7	Mid-cell-anchored protein Z OS=Streptococcus pyogenes serotype M49 (strain NZ131) OX=471876 GN=mapZ PE=3 SV=1	RDQFLSEDSHHPAK					0						RDQFLSEDSHHPAK	[9] Phospho (STY)	7.1405	0.418802	3	DQFLSEDSHHPAKQN	S	167								1497.54	3746.39	3080.78	1923.93	1723.22	1382.83	1857.63	3290.31	2609.39	3141.36	6130.35	4727.83	2174.42	2805.46	2332.27
3485	603.953	3	1808.84	60.7824	0.484083	3.04709	A0A0H3C268	6-phospho-beta-galactosidase OS=Streptococcus pyogenes serotype M49 (strain NZ131) OX=471876 GN=lacG PE=3 SV=1	DSGYSGEIGVVHALPTK					0						DSGYSGEIGVVHALPTK	[5] Phospho (STY)	6.5238	1.83626	2	LFKDSGYSGEIGVVH	S	218								565.536	1028.28	1175.56	619.33	388.132	662.179	327.185	595.789	592.388	3789.05	5637	7493.98	947.837	1087.47	1253.79
3494	773.386	2	1544.76	58.5594	0.422883	4.08587	B5XJ35	30S ribosomal protein S10 OS=Streptococcus pyogenes serotype M49 (strain NZ131) OX=471876 GN=rpsJ PE=3 SV=1	TGATVAGPVPLPTER	TGATVAGPVPLPTER	[4] Phospho (STY)	45.11	-1.68966	3	91.24	87.4667	TATRTGATVAGPVPL	T	35	TGATVAGPVPLPTER	[1] Phospho (STY)	7.0766	-1.64016	3	IVETATRTGATVAGP	T	32								297.602	569.765	323.023	209.442	155.894	157.2	162.703	233.55	255.841	96.6444	180.851	197.036	275.463	405.726	380.704
3516	831.341	2	1660.67	36.9065	0.5252	4.43213	B5XJX2	UPF0154 protein Spy49_0296 OS=Streptococcus pyogenes serotype M49 (strain NZ131) OX=471876 GN=Spy49_0296 PE=3 SV=1	EMMSQMGQKPSEAK	EMMSQMGQKPSEAK	[11] Phospho (STY)	29.93	0.425056	4	99.85	99.6625	SQMGQKPSEAKIQQT	S	56					0											341.791	3.16409	290.128	249.324	142.148	38.6796	378.591	693.647	473.889	3931.2	5819	3873.14	472.939	376.956	312.24
3541	859.897	2	1717.78	72.062	0.78395	4.63989	A0A0H3C002	Uncharacterized protein OS=Streptococcus pyogenes serotype M49 (strain NZ131) OX=471876 GN=Spy49_1390c PE=4 SV=1	SSPYSLDLISVDQSK	SSPYSLDLISVDQSK	[2] Phospho (STY)	48.46	-0.628486	7	49.95	49.6857	HIKITRSSPYSLDLI	S	193	SSPYSLDLISVDQSK	[1] Phospho (STY)	6.727	-0.642186	9	PHIKITRSSPYSLDL	S	192								609.195	2244.36	1813.86	580.005	510.883	581.71	877.831	1911.44	1560.64	247.49	524.726	579.245	2224.92	2770.32	2867.37
3602	575.267	2	1148.52	34.6696	0.586617	3.11634	B5XJR1	Elongation factor G OS=Streptococcus pyogenes serotype M49 (strain NZ131) OX=471876 GN=fusA PE=3 SV=1	ILQMHANSR	ILQMHANSR	[8] Phospho (STY)	38.79	2.67893	2	100	100	ILQMHANSRQEIETV	S	361					0											186.262	317.659	441.66	345.635	333.759	279.96	140.972	369.676	353.514	803.12	1628	1451.81	300.083	474.703	398.11
3632	750.824	2	1499.63	39.1098	0.525217	3.94737	B5XJR0	30S ribosomal protein S7 OS=Streptococcus pyogenes serotype M49 (strain NZ131) OX=471876 GN=rpsG PE=3 SV=1	EIMDAANNTGASVK	EIMDAANNTGASVK	[9] Phospho (STY)	66.08	0.845148	6	99.9	97.4383	IMDAANNTGASVKKR	T	131	EIMDAANNTGASVK	[9] Phospho (STY)	7.5166	0.829456	6	IMDAANNTGASVKKR	T	131	EIMDAANNTGASVK	[9] Phospho (STY)	62.6906	0.880446	IMDAANNTGASVKKR	T	131	88.3488	17.1208	229.774	82.0995	75.7646	31.3975	104.248	200.736	127.247	347.726	700.639	522.479	142.343	241.255	235.875
3685	824.317	2	1646.62	22.7208	0.989033	4.08587	A0A0H3BYW3	Uncharacterized protein OS=Streptococcus pyogenes serotype M49 (strain NZ131) OX=471876 GN=Spy49_0908 PE=4 SV=1	LTSDKTDADDDDEK	LTSDKTDADDDDEK	[3] Phospho (STY)	58.81	0.346997	4	81.71	62.3225	SKMEKLTSDKTDADD	S	123	LTSDKTDADDDDEK	[2] Phospho (STY)	7.2139	0.332705	3	QSKMEKLTSDKTDAD	T	122	LTSDKTDADDDDEK	[3] Phospho (STY)	55.7726	0.304122	SKMEKLTSDKTDADD	S	123	71.7647	652.218	503.465	484.862	435.918	360.444	282.434	944.193	748.102	1802.57	3773.78	3003.6	647.288	898.914	788.875
3698	794.044	3	2379.11	60.7824	0.504567	3.3241	B5XHV3	Translation initiation factor IF-2 OS=Streptococcus pyogenes serotype M49 (strain NZ131) OX=471876 GN=infB PE=3 SV=1	VATGEAGGITQHIGAYQIEEAGK	VATGEAGGITQHIGAYQIEEAGK	[3] Phospho (STY)	23.38	-0.64529	2	99.11	98.78	LRNSRVATGEAGGIT	T	483	VATGEAGGITQHIGAYQIEEAGK	[3] Phospho (STY)	5.8058	-0.655182	4	LRNSRVATGEAGGIT	T	483								250.566	499.083	471.626	169.867	128.216	264.413	276.704	358.548	360.676	3198.02	4676.01	5550	426.252	456.485	530.448
3759	715.638	3	2143.89	28.313	0.607133	3.3241	A0A0H3BXC6	Signal recognition particle receptor FtsY OS=Streptococcus pyogenes serotype M49 (strain NZ131) OX=471876 GN=ftsY PE=3 SV=1	QAQADASNDSAKEEAVDTSK					0						QAQADASNDSAKEEAVDTSK	[10] Phospho (STY)	6.5411	0.157524	4	QADASNDSAKEEAVD	S	137								372.075	956.003	843.485	574.417	487.696	598.645	477.549	811.928	691.868	2163.29	3554.44	3607.65	486.371	682.555	604.284
3772	444.53	3	1330.57	23.5049	0.525183	2.21607	A0A0H3BZL9	PTS system_ fructose-specific IIABC component OS=Streptococcus pyogenes serotype M49 (strain NZ131) OX=471876 GN=fruA PE=4 SV=1	NGKSETAVSTEK	NGKSETAVSTEK	[1] Deamidation (N)|[4] Phospho (STY)	74.91	2.29968	17	99.83	95.47	YHAKNGKSETAVSTE	S	274	NGKSETAVSTEK	[1] Deamidation (N)|[4] Phospho (STY)	6.7286	2.28199	16	YHAKNGKSETAVSTE	S	274								308.994	735.231	692.111	169.608	170.785	355.045	274.459	458.725	730.281	521.119	1133.49	2207.97	284.176	741.015	904.008
3776	670.333	2	1338.65	50.0084	0.688867	3.4626	A0A0H3BZQ5	SSU ribosomal protein S1p OS=Streptococcus pyogenes serotype M49 (strain NZ131) OX=471876 GN=rpsA PE=4 SV=1	ISEGAVVTGTVAR					0						ISEGAVVTGTVAR	[2] Phospho (STY)	6.9916	-1.90456	4	AEVFSKISEGAVVTG	S	192								303.046	696.627	524.542	534.785	518.515	489.794	271.945	481.626	368.929	1784.7	2819.55	2546.38	382.877	565.837	507.723
3864	656.292	3	1965.86	43.9105	0.627833	3.04709	A0A0H3BXI0	Uncharacterized protein OS=Streptococcus pyogenes serotype M49 (strain NZ131) OX=471876 GN=Spy49_1001c PE=3 SV=1	VTSAASSTSQFVSEQTEK	VTSAASSTSQFVSEQTEK	[13] Phospho (STY)	102.18	-0.612408	12	99.94	94.5133	SSTSQFVSEQTEKLK	S	141	VTSAASSTSQFVSEQTEK	[13] Phospho (STY)	8.5987	-0.624379	21	SSTSQFVSEQTEKLK	S	141								323.651	1861.69	1134.67	367.995	311.003	599.458	665.988	1398.38	1250.5	1888.08	2604.59	5893.26	693.363	1454.4	1553.88
3878	879.056	3	2634.14	59.023	1.09103	3.60111	A0A0H3BZ03	R3H domain protein OS=Streptococcus pyogenes serotype M49 (strain NZ131) OX=471876 GN=Spy49_0209 PE=4 SV=1	AQQPSIPVEESEVPQDPGNDGFSK					0						AQQPSIPVEESEVPQDPGNDGFSK	[11] Phospho (STY)	7.0599	-1.49137	9	PSIPVEESEVPQDPG	S	140								1807.28	3124.28	2865.96	752.758	663.317	706.31	1200.94	2394.23	2080.16	5186.87	8378.17	8623.54	2386.92	3190.1	3190.32
3879	758.822	2	1515.63	31.7436	0.730017	3.94737	B5XJR0	30S ribosomal protein S7 OS=Streptococcus pyogenes serotype M49 (strain NZ131) OX=471876 GN=rpsG PE=3 SV=1	EIMDAANNTGASVK	EIMDAANNTGASVK	[3] Oxidation (M)|[12] Phospho (STY)	46.97	0.705523	4	98.11	92.72	AANNTGASVKKREDT	S	134					0				EIMDAANNTGASVK	[3] Oxidation (M)|[12] Phospho (STY)	41.2117	0.674469	AANNTGASVKKREDT	S	134	0	226.828	22.6971	0.681272	6.05264	0	0	12.7373	0	12.1756	102.431	80.9193	26.6555	55.139	42.4355
3913	493.907	3	1478.7	44.8175	0.5793	2.07756	A0A0H3BZ03	R3H domain protein OS=Streptococcus pyogenes serotype M49 (strain NZ131) OX=471876 GN=Spy49_0209 PE=4 SV=1	KPAQVDIEGISDK	KPAQVDIEGISDK	[11] Phospho (STY)	86.38	-1.37544	5	100	100	QVDIEGISDKTVYKA	S	55	KPAQVDIEGISDK	[11] Phospho (STY)	7.3739	-1.32373	5	QVDIEGISDKTVYKA	S	55								835.39	1425.18	1596.36	1288.61	1037.27	1164.08	652.579	1107.04	1192.2	1631.59	2460.78	3583.95	1010.36	1499.53	1358.34
3957	1001.39	2	2000.77	51.4401	0.750283	5.33241	A0A0H3BZC1	Uncharacterized protein OS=Streptococcus pyogenes serotype M49 (strain NZ131) OX=471876 GN=Spy49_0377 PE=4 SV=1	RMETFESDDAVDFDTK	RMETFESDDAVDFDTK	[2] Oxidation (M)|[15] Phospho (STY)	52.1	0.538833	10	100	99.736	DDAVDFDTKVMTLPE	T	30					0											2410.02	11496.6	5054.4	2912.5	3105.14	2410.65	1907.56	5486.62	3469.53	375.435	958.805	671.875	2576.5	2927.12	2725.84
3983	671.945	3	2012.81	51.6375	0.6479	2.90859	B5XJR1	Elongation factor G OS=Streptococcus pyogenes serotype M49 (strain NZ131) OX=471876 GN=fusA PE=3 SV=1	LYDGSYHDVDSSETAFK					0						LYDGSYHDVDSSETAFK	[5] Phospho (STY)	7.0633	4.8973	2	KAKLYDGSYHDVDSS	S	569								388.417	1246.82	932.985	284.463	217.058	284.861	425.742	690.33	656.318	1753.19	2776.44	2855.83	724.386	943.511	934.282
4020	642.825	2	1283.64	46.8778	0.463867	3.67036	B5XIG1	Trigger factor OS=Streptococcus pyogenes serotype M49 (strain NZ131) OX=471876 GN=tig PE=3 SV=1	AVEVITSTASVK					0						AVEVITSTASVK	[10] Phospho (STY)	6.9907	-1.01461	2	EVITSTASVK-----	S	425								253.109	387.76	317.827	271.651	251.321	262.564	200.393	256.477	297.714	1225.24	1930.85	1789.23	349.301	475.61	437.087
4032	773.382	2	1544.75	59.3302	0.750283	4.15512	B5XJ99	30S ribosomal protein S4 OS=Streptococcus pyogenes serotype M49 (strain NZ131) OX=471876 GN=rpsD PE=3 SV=1	SKLSEYGLQLAEK	SKLSEYGLQLAEK	[4] Phospho (STY)	75.48	1.01	3	99.84	94.1633	PNNRSKLSEYGLQLA	S	45	SKLSEYGLQLAEK	[4] Phospho (STY)	7.0012	0.99477	2	PNNRSKLSEYGLQLA	S	45								302.98	1015.98	821.018	468.471	383.901	306.355	20.8531	366.866	300.611	145.577	441.331	332.937	421.155	542.105	383.646
4057	1085.97	2	2169.92	84.0316	0.907	5.88643	A0A0H3BZX9	PTS system_ mannose-specific IIC component OS=Streptococcus pyogenes serotype M49 (strain NZ131) OX=471876 GN=manM PE=4 SV=1	KGGNGGNAAGSADPIGDILEDY					0						KGGNGGNAAGSADPIGDILEDY	[11] Phospho (STY)	6.6785	-0.262546	5	NGGNAAGSADPIGDI	S	258								115.549	1297.33	756.001	533.717	364.588	520.551	91.1804	466.931	627.999	2828.31	5897.82	5667.39	1425.89	1812.93	1886.84
4064	949.921	2	1897.83	62.6574	0.558633	5.0554	A0A0H3BZ95	UPF0371 protein Spy49_1067 OS=Streptococcus pyogenes serotype M49 (strain NZ131) OX=471876 GN=Spy49_1067 PE=3 SV=1	GYPTDINHIISSEGMGK	GYPTDINHIISSEGMGK	[12] Phospho (STY)	37.72	0.124442	3	84.04	69.9867	DINHIISSEGMGKND	S	143					0											111.398	42.4163	370.108	514.915	285.3	295.559	192.734	454.869	367.69	2086.5	3928.48	2879.04	279.731	504.574	370.098
4068	529.255	2	1056.5	68.3855	0.586683	2.77008	B5XIG1	Trigger factor OS=Streptococcus pyogenes serotype M49 (strain NZ131) OX=471876 GN=tig PE=3 SV=1	SLLSADMLK	SLLSADMLK	[1] Phospho (STY)	36.92	2.67833	5	99.83	96.826	MPADQVRSLLSADML	S	400					0											170.279	17.3092	255.454	393.859	313.674	363.088	117.372	222.628	206.113	862.533	1492.65	1779.91	387.848	735.179	600.769
4079	853.408	2	1704.8	41.6534	0.42265	5.19391	A0A0H3BYA0	PTS system_ IIB component_ putative OS=Streptococcus pyogenes serotype M49 (strain NZ131) OX=471876 GN=Spy49_1328c PE=4 SV=1	ILAACGAGVNSSHQIK	ILAACGAGVNSSHQIK	[5] Carbamidomethyl (C)|[12] Phospho (STY)	55.89	-0.32977	2	92.99	71.495	CGAGVNSSHQIKDAI	S	15	ILAACGAGVNSSHQIK	[5] Carbamidomethyl (C)|[12] Phospho (STY)	7.7383	-0.343574	2	CGAGVNSSHQIKDAI	S	15								481.48	760.413	571.356	144.544	123.94	64.1949	306.687	609.33	417.943	2823.64	5107.71	3283.33	377.158	446.004	263.336
4080	513.767	2	1025.52	56.7655	0.791433	2.63158	B5XJ99	30S ribosomal protein S4 OS=Streptococcus pyogenes serotype M49 (strain NZ131) OX=471876 GN=rpsD PE=3 SV=1	LGLSLTGTGK	LGLSLTGTGK	[6] Phospho (STY)	52.03	3.5295	3	97.35	83.2767	RRLGLSLTGTGKELA	T	20					0				LGLSLTGTGK	[4] Phospho (STY)	31.3369	3.48361	QSRRLGLSLTGTGKE	S	18	151.263	365.773	296.872	399.032	384.282	519.517	50.6655	163.081	155.18	84.6145	216.241	221.287	206.546	362.133	335.638
4091	584.623	3	1750.85	50.1034	0.504567	2.83934	A0A0H3BZC7	EIIAB-Man OS=Streptococcus pyogenes serotype M49 (strain NZ131) OX=471876 GN=manL PE=4 SV=1	IIVASDEVAQDDLRK					0						IIVASDEVAQDDLRK	[5] Phospho (STY)	7.3838	-0.892961	2	ADRIIVASDEVAQDD	S	201								933.9	1694.42	1383.91	304.792	397.117	479.434	732.718	1202.85	1079.57	591.583	877.695	1041.82	1042.71	1467.35	1526.42
4147	728.873	2	1455.73	43.3443	0.702133	3.94737	B5XJD9	Acetate kinase OS=Streptococcus pyogenes serotype M49 (strain NZ131) OX=471876 GN=ackA PE=3 SV=1	SKTIAINAGSSSLK	SKTIAINAGSSSLK	[3] Phospho (STY)	37.97	-0.689102	3	57.33	53.2967	----MSKTIAINAGS	T	4					0											279.729	852.125	552.068	395.521	295.768	142.091	112.743	319.203	214.101	564.714	1060.17	804.302	518.446	665.631	501.626
4163	942.95	2	1883.89	42.4782	0.58665	5.12465	A0A0H3BYW3	Uncharacterized protein OS=Streptococcus pyogenes serotype M49 (strain NZ131) OX=471876 GN=Spy49_0908 PE=4 SV=1	EKVEGIGEATSQTIQSK					0						EKVEGIGEATSQTIQSK	[10] Phospho (STY)	7.079	-0.957365	4	VEGIGEATSQTIQSK	T	110								422.818	886.274	600.879	960.836	954.742	516.337	697.17	1446.43	861.023	1676.5	3212	2016.72	980.124	1130.16	957.558
4175	896.944	2	1791.87	73.8554	0.5866	4.9169	A0A0H3C0B4	Uncharacterized protein OS=Streptococcus pyogenes serotype M49 (strain NZ131) OX=471876 GN=Spy49_0994c PE=4 SV=1	LASQNALELANQLAEK	LASQNALELANQLAEK	[3] Phospho (STY)	81.33	-1.91202	3	100	100	AKLDKLASQNALELA	S	107					0											46.596	184.948	124.887	298.658	239.12	323.606	176.47	296.492	233.973	1784.38	3529.17	3614.62	222.153	292.435	255.632
4197	415.204	2	828.393	65.5623	0.681667	2.21607	A0A0H3BY96	Phosphate acetyltransferase OS=Streptococcus pyogenes serotype M49 (strain NZ131) OX=471876 GN=pta PE=3 SV=1	SLFGGLR	SLFGGLR	[1] Phospho (STY)	37.26	3.86481	10	100	100	---MSIRSLFGGLRE	S	5					0											137.25	300.654	239.953	188.291	160.549	208.497	70.3132	143.35	145.482	518.534	992.307	1048.35	203.141	348.082	285.939
4212	540.253	4	2156.98	58.2184	0.389317	2.77008	B5XIW8	10 kDa chaperonin OS=Streptococcus pyogenes serotype M49 (strain NZ131) OX=471876 GN=groS PE=3 SV=1	FDDEKEQTVGGFVLAGTHK	FDDEKEQTVGGFVLAGTHK	[8] Phospho (STY)	28.57	2.51706	2	99.89	99.855	FDDEKEQTVGGFVLA	T	20	FDDEKEQTVGGFVLAGTHK	[8] Phospho (STY)	7.6555	2.55251	14	FDDEKEQTVGGFVLA	T	20								1904.27	3331.1	3156.95	755.518	781.496	1040.47	1127.23	1934.48	1843.14	516.97	1062.27	1340.42	1382.6	2226.27	2115.94
4250	625.979	3	1874.92	38.6256	0.525133	3.25485	B5XKI1	Elongation factor Tu OS=Streptococcus pyogenes serotype M49 (strain NZ131) OX=471876 GN=tuf PE=3 SV=1	SKPHVNIGTIGHVDHGK	SKPHVNIGTIGHVDHGK	[1] Phospho (STY)	68.6	0.178366	4	100	99.39	AKEKYDRSKPHVNIG	S	9	SKPHVNIGTIGHVDHGK	[1] Phospho (STY)	7.5778	0.21915	10	AKEKYDRSKPHVNIG	S	9								88.3751	1112.88	798.626	356.364	327.302	262.086	55.4949	530.314	361.782	177.834	2508.34	1993.52	533.817	841.839	706.691
4271	551.254	2	1100.49	71.1959	0.586833	2.83934	B5XJ52	50S ribosomal protein L18 OS=Streptococcus pyogenes serotype M49 (strain NZ131) OX=471876 GN=rplR PE=3 SV=1	GISEVVFDR	GISEVVFDR	[3] Phospho (STY)	61.31	2.24249	10	100	100	RAVAKGISEVVFDRG	S	89					0											78.3574	385.943	326.397	253.536	214.028	278.521	118.526	271.614	236.208	1189.3	1936.54	2014.35	151.751	349.948	257.356
4307	988.107	3	2961.3	51.3582	0.566	4.15512	A0A0H3BZJ8	Cell division protein FtsA OS=Streptococcus pyogenes serotype M49 (strain NZ131) OX=471876 GN=ftsA PE=3 SV=1	RPESTIGYEQQASQTAYDSQVPSDPK					0						RPESTIGYEQQASQTAYDSQVPSDPK	[4] Phospho (STY)	6.8589	-1.02788	6	DDSRRPESTIGYEQQ	S	416								726.897	1339.06	1071.67	816.6	678.301	706.588	887.71	1474.05	1269.25	2323.7	3335.47	2865.7	1161.83	1323.4	1299.64
4343	543.607	3	1627.8	58.5799	0.402183	2.83934	B5XJ47	50S ribosomal protein L24 OS=Streptococcus pyogenes serotype M49 (strain NZ131) OX=471876 GN=rplX PE=3 SV=1	EAPIHVSNVQVLDK					0						EAPIHVSNVQVLDK	[7] Phospho (STY)	6.8089	1.05853	2	KEAPIHVSNVQVLDK	S	66								45.9705	123.752	86.5415	9.04059	35.4145	76.322	4.2688	51.7361	41.6073	281.419	419.058	579.33	39.464	112.379	147.247
4344	590.749	2	1179.48	28.1901	0.845383	2.97784	A0A0H3BWH3	Putative calcium-transporting ATPase OS=Streptococcus pyogenes serotype M49 (strain NZ131) OX=471876 GN=pacL PE=4 SV=1	DGHVTEIDSK	DGHVTEIDSK	[5] Phospho (STY)	28.82	1.9427	2	99.78	99.64	IRRDGHVTEIDSKEL	T	134					0											338.792	856.906	570.506	362.41	297.704	230.678	189.903	650.56	536.981	1398.83	2595.98	2027.42	345.907	487.419	402.858
4350	437.446	4	1745.75	31.2184	0.968467	1.93906	A0A0H3BZR7	Mid-cell-anchored protein Z OS=Streptococcus pyogenes serotype M49 (strain NZ131) OX=471876 GN=mapZ PE=3 SV=1	RDQFLSEDSHHPAK					0						RDQFLSEDSHHPAK	[9] Phospho (STY)	7.1405	1.22133	3	DQFLSEDSHHPAKQN	S	167								1494.29	2802.08	2477.87	1603.16	1394.25	1785.3	1705.78	2455.77	2488.67	2885.29	5013.86	5462.64	1893.1	2655.98	2565.22
4388	879.385	2	1756.75	44.4358	0.48435	5.88643	A0A0H3BYW2	EIICB-Lac OS=Streptococcus pyogenes serotype M49 (strain NZ131) OX=471876 GN=lacE PE=4 SV=1	EYGAPVTAAAGSYGAHR	EYGAPVTAAAGSYGAHR	[12] Phospho (STY)	44.98	-1.3019	5	99.8	98.888	PVTAAAGSYGAHREI	S	499	EYGAPVTAAAGSYGAHR	[12] Phospho (STY)	7.0527	-1.31529	5	PVTAAAGSYGAHREI	S	499	EYGAPVTAAAGSYGAHR	[12] Phospho (STY)	54.377	-1.32869	PVTAAAGSYGAHREI	S	499	468.613	1051.56	754.633	276.364	211.3	149.405	119.971	438.556	327.503	1634.6	3200.27	2608.21	550.07	730.982	686.264
4410	785.36	2	1568.71	41.2848	0.463617	4.15512	B5XJ60	30S ribosomal protein S13 OS=Streptococcus pyogenes serotype M49 (strain NZ131) OX=471876 GN=rpsM PE=3 SV=1	VKDLTSDQEDAIR					0						VKDLTSDQEDAIR	[6] Phospho (STY)	7.1276	-1.71626	2	IRVKDLTSDQEDAIR	S	50								150.433	758.347	400.14	143.15	129.093	86.1874	121.657	351.761	246.461	686.778	1298.24	855.389	230.331	353.019	244.271
4412	601.632	3	1801.87	42.1375	0.545517	2.70083	B5XMJ7	Cell cycle protein GpsB OS=Streptococcus pyogenes serotype M49 (strain NZ131) OX=471876 GN=gpsB PE=3 SV=1	NTVSATVQQPVPQPTR					0						NTVSATVQQPVPQPTR	[6] Phospho (STY)	7.1071	0.672351	7	ARNTVSATVQQPVPQ	T	70								836.466	1276.02	1337.13	432.359	352.653	673.639	708.577	982.598	1268.6	383.279	666.812	999.191	686.698	1136.12	1287.38
4423	868.872	2	1735.73	43.631	0.48425	4.70914	B5XIW7	60 kDa chaperonin OS=Streptococcus pyogenes serotype M49 (strain NZ131) OX=471876 GN=groL PE=3 SV=1	SQLETTTSDFDREK					0						SQLETTTSDFDREK	[8] Phospho (STY)	7.7677	0.0907329	6	SQLETTTSDFDREKL	S	356								24.0538	155.846	73.0072	184.924	198.952	119.823	41.8919	111.666	42.4759	752.406	1300.99	973.381	44.6557	35.0587	40.8076
4426	699.835	2	1397.66	56.8269	0.750483	3.73961	A0A0H3C002	Uncharacterized protein OS=Streptococcus pyogenes serotype M49 (strain NZ131) OX=471876 GN=Spy49_1390c PE=4 SV=1	EISLGTASGLAGSR					0						EISLGTASGLAGSR	[8] Phospho (STY)	6.516	0.0776051	2	EISLGTASGLAGSRI	S	107								201.724	679.436	392.829	151.161	99.0462	133.361	159.152	352.417	316.651	460.698	876.197	793.842	328.509	467.963	409.781
4467	549.881	3	1646.62	22.7003	0.88665	2.70083	A0A0H3BYW3	Uncharacterized protein OS=Streptococcus pyogenes serotype M49 (strain NZ131) OX=471876 GN=Spy49_0908 PE=4 SV=1	LTSDKTDADDDDEK	LTSDKTDADDDDEK	[3] Phospho (STY)	58.81	1.64047	4	81.67	62.3125	SKMEKLTSDKTDADD	S	123	LTSDKTDADDDDEK	[2] Phospho (STY)	7.2139	1.62618	3	QSKMEKLTSDKTDAD	T	122	LTSDKTDADDDDEK	[3] Phospho (STY)	51.2826	1.5976	SKMEKLTSDKTDADD	S	123	68.8094	446.975	418.815	335.356	286.823	379.303	211.617	645.899	748.855	965.931	2306.22	3320.55	345.518	837.209	990.505
4479	950.472	1	949.465	29.7658	0.4432	8.03324	B5XIW7	60 kDa chaperonin OS=Streptococcus pyogenes serotype M49 (strain NZ131) OX=471876 GN=groL PE=3 SV=1	AIAQPVSGK	AIAQPVSGK	[7] Phospho (STY)	33.03	1.81914	7	100	100	KAIAQPVSGKEAIAQ	S	138					0											0	139.003	97.1093	52.7407	75.8275	58.6075	0	120.59	180.937	473.616	1584.26	1838.63	17.0133	58.6163	132.643
4485	598.299	3	1791.88	73.8554	0.607117	3.11634	A0A0H3C0B4	Uncharacterized protein OS=Streptococcus pyogenes serotype M49 (strain NZ131) OX=471876 GN=Spy49_0994c PE=4 SV=1	LASQNALELANQLAEK	LASQNALELANQLAEK	[3] Phospho (STY)	81.33	-0.160263	3	100	100	AKLDKLASQNALELA	S	107					0											71.8128	213.429	185.169	143.449	96.9018	256.084	157.458	290.642	308.103	1731.04	3082.87	4990.57	151.337	380.89	450.334
4493	724.835	2	1447.66	52.2035	0.504567	3.73961	B5XKM2	50S ribosomal protein L19 OS=Streptococcus pyogenes serotype M49 (strain NZ131) OX=471876 GN=rplS PE=3 SV=1	KGQGISEMYTVR	KGQGISEMYTVR	[6] Phospho (STY)	74.9	2.33463	3	100	99.2133	SRKGQGISEMYTVRK	S	56	KGQGISEMYTVR	[6] Phospho (STY)	6.3267	2.31837	3	SRKGQGISEMYTVRK	S	56								59.565	194.934	100.21	150.154	98.5645	189.456	42.3179	55.7782	37.8181	94.0852	290.885	164.665	49.7133	70.8599	59.8509
4502	568.586	3	1702.74	29.6019	0.44325	2.42382	A0A0H3BZ76	Putative phosphoprotein phosphatase (PppL protein) OS=Streptococcus pyogenes serotype M49 (strain NZ131) OX=471876 GN=pppL PE=4 SV=1	AGQITEEEAASHPQR	AGQITEEEAASHPQR	[11] Phospho (STY)	41.1	2.53548	2	99.98	99.97	ITEEEAASHPQRNII	S	155					0											280.692	672.567	549.868	249.201	262.308	283.65	395.338	674.284	549.685	1281.18	2161.5	2040.7	458.977	643.989	625.759
4588	859.897	2	1717.78	70.3094	0.5252	4.63989	A0A0H3C002	Uncharacterized protein OS=Streptococcus pyogenes serotype M49 (strain NZ131) OX=471876 GN=Spy49_1390c PE=4 SV=1	SSPYSLDLISVDQSK					0						SSPYSLDLISVDQSK	[1] Phospho (STY)	6.2089	-1.28339	4	PHIKITRSSPYSLDL	S	192								127.056	629.191	433.33	100.765	49.5285	59.9993	83.4197	361.924	312.447	35.1757	232.763	262.76	533.99	759.297	612.779
4625	536.746	2	1071.48	68.6314	0.5662	2.90859	A0A0H3C0C8	Putative alkaline-shock protein OS=Streptococcus pyogenes serotype M49 (strain NZ131) OX=471876 GN=asp PE=3 SV=1	DNFQSLLR	DNFQSLLR	[5] Phospho (STY)	45.37	1.63349	5	100	100	AIKDNFQSLLRKENY	S	48					0											147.871	328.459	276.064	193.701	184.061	349.281	139.621	343.823	429.369	1037.37	1505.71	1628.38	135.098	252.956	289.603
4706	1065.5	1	1064.49	32.1048	0.34085	10.1801	A0A0H3BZ85	Putative endopeptidase Clp ATP-binding chain C OS=Streptococcus pyogenes serotype M49 (strain NZ131) OX=471876 GN=clpC PE=3 SV=1	ELTSGHTLK	ELTSGHTLK	[4] Phospho (STY)	38.99	2.10403	6	93.04	78.475	ILSRELTSGHTLKIG	S	796					0											0	22.4101	4.20159	0	0	0	0	24.912	24.0998	536.619	1599.88	1455.55	0	2.90052	0
4710	917.086	3	2748.24	62.4526	0.566	4.15512	A0A0H3BZV5	PTS system_ lactose-specific IIA component (EIIA-Lac) (Lactose-permease IIA component) (Phosphotransferase enzyme II_ A component) OS=Streptococcus pyogenes serotype M49 (strain NZ131) OX=471876 GN=lacF PE=4 SV=1	AEELIAAGSDCLNDAHNAQTSLLQK	AEELIAAGSDCLNDAHNAQTSLLQK	[11] Carbamidomethyl (C)|[21] Phospho (STY)	26.53	-2.53697	2	33.33	33.33	DAHNAQTSLLQKEAA	S	59	AEELIAAGSDCLNDAHNAQTSLLQK	[11] Carbamidomethyl (C)|[21] Phospho (STY)	6.7202	-2.58192	4	DAHNAQTSLLQKEAA	S	59								694.781	1287.82	937.811	141.188	132.947	141.482	89.2305	406.032	383.914	4073	6289.75	6776.65	1465.44	1880.79	1746.1
4735	610.999	3	1829.97	52.7286	0.62005	3.3241	A0A0H3BVE1	30S ribosomal protein S5 OS=Streptococcus pyogenes serotype M49 (strain NZ131) OX=471876 GN=rpsE PE=3 SV=1	VLLKPAVEGSGVAAGGAVR					0						VLLKPAVEGSGVAAGGAVR	[10] Phospho (STY)	6.565	-1.176	2	LKPAVEGSGVAAGGA	S	102								205.648	681.507	595.423	339.349	317.521	481.073	187.285	344.933	365.584	384.711	823.443	1024.39	262.846	584.098	614.673
4817	855.387	2	1708.76	76.4812	0.599833	4.84765	A0A0H3BZR7	Mid-cell-anchored protein Z OS=Streptococcus pyogenes serotype M49 (strain NZ131) OX=471876 GN=mapZ PE=3 SV=1	YTELDTASLDNFIK					0						YTELDTASLDNFIK	[1] Phospho (STY)	7.0192	-0.0444761	5	SQKFDAKYTELDTAS	Y	68								298.35	1009.62	829.912	565.828	418.194	540.853	478.154	853.038	930.237	578.618	1316.7	1611.77	1051.86	1560.72	1666.76
4834	501.57	3	1501.69	47.3414	0.70215	2.28532	B5XKI1	Elongation factor Tu OS=Streptococcus pyogenes serotype M49 (strain NZ131) OX=471876 GN=tuf PE=3 SV=1	GEVYILSKDEGGR					0						GEVYILSKDEGGR	[7] Phospho (STY)	7.419	3.96972	2	KGEVYILSKDEGGRH	S	317								229.818	382.646	394.738	215.742	222.276	265.331	259.366	426.281	434.198	851.593	1356.39	1491.33	267.252	449.419	481.976
4839	1173.82	3	3518.44	58.0341	2.4007	4.63989	A0A0H3C1V2	Single-stranded DNA-binding protein OS=Streptococcus pyogenes serotype M49 (strain NZ131) OX=471876 GN=ssb2 PE=3 SV=1	EGGSTGSFNGGFNNNTSSSNSYSAPAQQTPNFGR					0						EGGSTGSFNGGFNNNTSSSNSYSAPAQQTPNFGR	[4] Phospho (STY)	7.6556	-1.12444	6	RATREGGSTGSFNGG	S	113								2314.38	5938.65	4705.46	1078.18	1260.89	869.91	1587	3329.4	3006.49	4271.68	6930.08	6190.21	3637.69	4274.56	3905.15
4858	982.462	1	981.455	29.6224	0.3818	8.72576	A0A0H3C1S0	CsbD domain-containing protein OS=Streptococcus pyogenes serotype M49 (strain NZ131) OX=471876 GN=Spy49_1665c PE=3 SV=1	IEQASGGLK	IEQASGGLK	[5] Phospho (STY)	57.02	1.41101	27	100	100	KSKIEQASGGLKEGA	S	14					0											21.2246	631.136	458.912	329.538	304.654	393.848	9.86499	442.026	431.349	135.17	587.502	521.074	27.5169	81.8293	109.611
4889	755.869	2	1509.72	47.9692	0.648117	4.01662	A0A0H3C1H3	Fructose-bisphosphate aldolase class II OS=Streptococcus pyogenes serotype M49 (strain NZ131) OX=471876 GN=fba PE=4 SV=1	QAPVLIQTSMGAAK					0										0				QAPVLIQTSMGAAK	[9] Phospho (STY)|[10] Oxidation (M)	45.1658	-2.30274	APVLIQTSMGAAKYM	S	50	33.6383	397.66	91.1058	41.5529	41.996	32.977	10.6974	84.2134	64.5457	90.2882	239.117	182.425	42.2577	103.457	67.5725
4909	458.21	2	914.406	32.5685	0.7226	2.21607	B5XMC1	Ornithine carbamoyltransferase OS=Streptococcus pyogenes serotype M49 (strain NZ131) OX=471876 GN=arcB PE=3 SV=1	TQVFQGR	TQVFQGR	[1] Phospho (STY)	40.01	5.28055	4	100	100	------MTQVFQGRS	T	2					0											289.03	509.488	401.236	245.195	255.291	197.258	184.531	314.739	310.931	1333.69	2485.38	2233.52	232.551	377.341	412.07
4929	718.95	3	2153.83	48.2485	1.28888	3.11634	A0A0H3BZ03	R3H domain protein OS=Streptococcus pyogenes serotype M49 (strain NZ131) OX=471876 GN=Spy49_0209 PE=4 SV=1	VLESGQDYTMDPMSNSER					0						VLESGQDYTMDPMSNSER	[10] Oxidation (M)|[16] Phospho (STY)	7.4999	-0.137565	3	TMDPMSNSERKIVHK	S	270								173.077	13.0344	507.723	76.4181	103.212	302.567	142.949	486.963	456.39	2964.79	4268.42	5754.64	187.455	669	704.436
5024	1069.92	2	2137.83	56.5812	0.750683	5.67867	A0A0H3BZ03	R3H domain protein OS=Streptococcus pyogenes serotype M49 (strain NZ131) OX=471876 GN=Spy49_0209 PE=4 SV=1	VLESGQDYTMDPMSNSER					0						VLESGQDYTMDPMSNSER	[14] Phospho (STY)	7.4374	-0.0784415	10	DYTMDPMSNSERKIV	S	268								162.165	0	169.625	187.733	56.7815	27.044	140.367	169.354	213.565	2679.5	4481.29	2581.81	279.758	258.478	199.449
5054	515.924	3	1544.75	59.3302	0.504567	2.49307	B5XJ99	30S ribosomal protein S4 OS=Streptococcus pyogenes serotype M49 (strain NZ131) OX=471876 GN=rpsD PE=3 SV=1	SKLSEYGLQLAEK	SKLSEYGLQLAEK	[4] Phospho (STY)	75.48	1.22883	3	99.84	93.9767	PNNRSKLSEYGLQLA	S	45	SKLSEYGLQLAEK	[4] Phospho (STY)	7.0012	1.21359	2	PNNRSKLSEYGLQLA	S	45								824.4	922.435	440.51	122.617	318.157	418.02	98.267	220.999	308.349	150.9	370.174	585.453	164.512	493.888	674.727
5058	593.936	3	1778.78	28.1287	0.5251	2.49307	A0A0H3BXI0	Uncharacterized protein OS=Streptococcus pyogenes serotype M49 (strain NZ131) OX=471876 GN=Spy49_1001c PE=3 SV=1	TKEEHEAASVTVQDR					0						TKEEHEAASVTVQDR	[9] Phospho (STY)	7.3892	0.601705	2	KEEHEAASVTVQDRV	S	122								384.427	1605.91	926.377	506.689	513.209	535.086	397.656	728.793	635.899	619.623	1192.27	1106.61	546.816	757.272	737.206
5062	642.286	2	1282.56	34.4237	0.640683	3.25485	A0A0H3C1I8	Guanylate kinase OS=Streptococcus pyogenes serotype M49 (strain NZ131) OX=471876 GN=gmk PE=3 SV=1	GTDSQEVIAQR	GTDSQEVIAQR	[4] Phospho (STY)	30.11	2.14489	3	98.39	78.51	LVGRGTDSQEVIAQR	S	142					0											190.856	692.047	608.434	487.854	474.158	364.283	292.062	795.25	751.403	1315.3	2648.76	2336.57	320.748	553.827	463.4
5071	529.751	2	1057.49	49.7626	0.443133	2.70083	B5XMM9	Glycine--tRNA ligase beta subunit OS=Streptococcus pyogenes serotype M49 (strain NZ131) OX=471876 GN=glyS PE=3 SV=1	SQFVIADAK	SQFVIADAK	[1] Phospho (STY)	40.33	2.51799	3	100	100	SYEADLRSQFVIADA	S	208					0											170.218	389.034	295.789	336.395	212.005	222.552	137.065	213.769	230.424	1614.29	2798.09	2533.56	288.751	335.382	384.334
5156	787.864	2	1573.71	53.0153	0.6479	4.22438	A0A0H3BZK2	50S ribosomal protein L27 OS=Streptococcus pyogenes serotype M49 (strain NZ131) OX=471876 GN=rpmA PE=3 SV=1	AADGQTVSGGSILYR					0						AADGQTVSGGSILYR	[8] Phospho (STY)	6.5005	0.031656	2	AADGQTVSGGSILYR	S	43	AADGQTVSGGSILYR	[8] Phospho (STY)	64.6665	0.0802461	AADGQTVSGGSILYR	S	43	276.894	535.525	370.504	207.877	229.344	210.856	103.057	397.987	250.53	178.282	361.247	338.828	192.91	307.535	241.121
5166	556.295	2	1110.57	77.2524	0.627833	3.1856	B5XK64	Ribosome-recycling factor OS=Streptococcus pyogenes serotype M49 (strain NZ131) OX=471876 GN=frr PE=3 SV=1	VLLISPFDK	VLLISPFDK	[5] Phospho (STY)	35.63	1.89865	4	100	100	EARVLLISPFDKSSI	S	68					0											116.552	269.477	224.104	166.665	157.901	193.336	86.3743	169.338	155.718	985.823	1911.18	2553.99	184.7	279.378	282.981
5210	456.745	4	1822.95	55.6742	0.783917	2.28532	A0A0H3BY55	Non-specific serine/threonine protein kinase OS=Streptococcus pyogenes serotype M49 (strain NZ131) OX=471876 GN=Spy49_1257c PE=4 SV=1	KIIFEDVESTKPLPK	KIIFEDVESTKPLPK	[10] Phospho (STY)	81.93	0.575134	17	86.05	62.8224	IFEDVESTKPLPKVA	T	291					0											1013.25	1467.63	1739.45	2554.45	3120.82	3587.98	861.047	1332.15	1929.61	225.722	441.521	928.48	908.38	1720.32	2244.02
5231	841.371	1	840.363	63.1824	0.72245	7.13296	A0A0H3BVE1	30S ribosomal protein S5 OS=Streptococcus pyogenes serotype M49 (strain NZ131) OX=471876 GN=rpsE PE=3 SV=1	GISVSDLA	GISVSDLA	[3] Phospho (STY)	41.53	0.38877	5	99.46	97.718	VAALRGISVSDLA--	S	159					0											32.0373	282.322	145.39	109.054	100.033	48.4789	5.60931	176.775	73.7015	851.976	1981.99	1338.8	152.634	146.732	86.6147
5243	1017.47	2	2032.93	59.8552	0.52505	5.88643	A0A0H3BYP4	Phosphoglucosamine mutase OS=Streptococcus pyogenes serotype M49 (strain NZ131) OX=471876 GN=glmM PE=3 SV=1	ASAGVMISASHNPALDNGIK	ASAGVMISASHNPALDNGIK	[10] Phospho (STY)|[17] Deamidation (N)	100.13	-0.429626	21	98.6	62.63	AGVMISASHNPALDN	S	100	ASAGVMISASHNPALDNGIK	[10] Phospho (STY)|[17] Deamidation (N)	6.4841	-0.392011	6	AGVMISASHNPALDN	S	100								330.442	13.4414	306.808	8.74654	0	0	643.179	1222.51	813.361	1664.82	3186.96	2069.87	1338.81	1310.51	1257.4
5278	506.747	2	1011.48	73.4941	0.668433	2.83934	B5XJ63	50S ribosomal protein L17 OS=Streptococcus pyogenes serotype M49 (strain NZ131) OX=471876 GN=rplQ PE=3 SV=1	LFSEIAPR	LFSEIAPR	[3] Phospho (STY)	36.94	1.3916	3	100	100	TALQKLFSEIAPRYA	S	93					0											46.833	293.026	171.761	116.746	87.178	103.372	56.8161	159.042	131.104	322.96	774.908	812.895	145.406	300.709	228.157
5299	513.251	2	1024.49	45.5273	0.6483	2.56233	B5XJR1	Elongation factor G OS=Streptococcus pyogenes serotype M49 (strain NZ131) OX=471876 GN=fusA PE=3 SV=1	SVQEEIIK	SVQEEIIK	[1] Phospho (STY)	44.44	3.52672	2	100	100	HYEDVPKSVQEEIIK	S	680					0											175.687	437.488	329.981	573.473	570.896	566.011	131.121	291.396	247.51	366.766	655.308	708.823	264.553	514.295	461.012
5321	513.256	2	1024.5	48.5354	0.607133	2.63158	B5XI03	GTP-sensing transcriptional pleiotropic repressor CodY OS=Streptococcus pyogenes serotype M49 (strain NZ131) OX=471876 GN=codY PE=3 SV=1	LTASVIADR	LTASVIADR	[4] Phospho (STY)	64.77	1.30774	2	99.23	85.425	NEGRLTASVIADRIG	S	208					0											126.976	257.907	248.969	700.146	730.79	730.955	71.199	125.152	143.619	111.167	268.266	304.278	242.044	487.775	413.225
5367	660.787	2	1319.56	58.2799	0.709583	3.60111	B5XKM2	50S ribosomal protein L19 OS=Streptococcus pyogenes serotype M49 (strain NZ131) OX=471876 GN=rplS PE=3 SV=1	GQGISEMYTVR	GQGISEMYTVR	[5] Phospho (STY)	69.66	0.863482	3	100	100	SRKGQGISEMYTVRK	S	56					0				GQGISEMYTVR	[5] Phospho (STY)	71.7075	0.903597	SRKGQGISEMYTVRK	S	56	19.1332	25.8993	11.9179	7.4859	8.77722	11.7648	22.1845	22.9701	5.08967	24.4953	124.457	116.231	0	3.24698	5.69432
5437	664.257	2	1326.5	49.2376	0.558633	3.53186	A0A0H3BVI6	Putative V-type Na+-ATPase subunit E OS=Streptococcus pyogenes serotype M49 (strain NZ131) OX=471876 GN=ntpE PE=4 SV=1	FSSYDCAELR	FSSYDCAELR	[3] Phospho (STY)|[6] Carbamidomethyl (C)	57.41	2.96737	2	98.83	98.155	KTGQKFSSYDCAELR	S	132					0											127.957	252.411	214.232	144.527	151.555	139.507	76.2167	214.622	117.479	3365.85	5482.81	4922.35	117.927	196.772	175.387
5438	594.779	2	1187.54	67.3629	0.5253	3.1856	B5XKI1	Elongation factor Tu OS=Streptococcus pyogenes serotype M49 (strain NZ131) OX=471876 GN=tuf PE=3 SV=1	AVVTGVEMFR	AVVTGVEMFR	[4] Phospho (STY)	32.34	2.18814	4	100	100	ETKKAVVTGVEMFRK	T	261					0											85.6487	9.12558	201.628	559.896	591.485	578.21	36.9674	123.441	170.017	1033.52	2103.92	2287.29	128.666	220.318	228.201
5482	792.866	2	1583.72	46.7751	0.463867	4.36288	A0A0H3BWH3	Putative calcium-transporting ATPase OS=Streptococcus pyogenes serotype M49 (strain NZ131) OX=471876 GN=pacL PE=4 SV=1	DLSTAVSKDAGIGDR	DLSTAVSKDAGIGDR	[7] Phospho (STY)	51.57	-0.713169	2	99.61	98.695	KDLSTAVSKDAGIGD	S	190					0											266.057	585.461	508.272	225.664	243.307	134.208	171.111	495.833	401.009	1192.8	2290.84	1760.94	405.564	645.061	553.08
5487	527.917	3	1580.73	53.8197	0.402183	2.90859	A0A0H3BY45	Ribosome hibernation promoting factor OS=Streptococcus pyogenes serotype M49 (strain NZ131) OX=471876 GN=hpf PE=3 SV=1	NVTLKPMDVEEAR					0						NVTLKPMDVEEAR	[3] Phospho (STY)	6.3324	2.36498	2	VVRTKNVTLKPMDVE	T	134								78.9293	93.8805	131.619	160.788	155.541	212.387	12.1272	117.123	112.925	478.646	810.717	889.472	132.729	191.404	238.235
5502	724.314	3	2169.92	84.0521	0.825083	2.97784	A0A0H3BZX9	PTS system_ mannose-specific IIC component OS=Streptococcus pyogenes serotype M49 (strain NZ131) OX=471876 GN=manM PE=4 SV=1	KGGNGGNAAGSADPIGDILEDY					0						KGGNGGNAAGSADPIGDILEDY	[11] Phospho (STY)	6.6785	-1.00621	5	NGGNAAGSADPIGDI	S	258								64.1654	561.499	553.664	260.126	145.067	838.309	12.4895	199.466	529.096	1166.97	2767.18	6637.25	378.032	1883.41	2783.08
5641	597.93	3	1790.77	32.8275	0.463617	2.56233	A0A0H3BY05	Carbamate kinase OS=Streptococcus pyogenes serotype M49 (strain NZ131) OX=471876 GN=arcC PE=3 SV=1	KQMAESGASFKEDAGR					0						KQMAESGASFKEDAGR	[6] Phospho (STY)	6.4036	1.22002	2	AKKQMAESGASFKED	S	147								140.572	90.5759	292.685	138.822	137.288	89.8491	121.958	191.672	196.402	3015.14	4563.31	4356.4	277.113	354.119	342.462
5674	742.026	3	2223.06	77.4498	0.48425	3.67036	A0A0H3BZL9	PTS system_ fructose-specific IIABC component OS=Streptococcus pyogenes serotype M49 (strain NZ131) OX=471876 GN=fruA PE=4 SV=1	SQELISLILNNEGNTYHAK	SQELISLILNNEGNTYHAK	[16] Phospho (STY)	32.62	-0.291919	3	99.87	99.7967	LNNEGNTYHAKNGKS	Y	267	SQELISLILNNEGNTYHAK	[15] Phospho (STY)	6.8501	-0.302505	2	ILNNEGNTYHAKNGK	T	266								237.877	764.234	407.709	621.376	318.4	479.816	257.384	458.669	383.897	996.358	1738.61	2361.47	1353.64	1776.75	1732.14
5774	576.735	2	1151.46	27.0581	0.422667	2.70083	A0A0H3C0F2	Tagatose 1_6-diphosphate aldolase OS=Streptococcus pyogenes serotype M49 (strain NZ131) OX=471876 GN=lacD2 PE=3 SV=1	TGYDATTTSR	TGYDATTTSR	[1] Phospho (STY)	39.69	5.90677	3	99.96	99.1533	LLLAYEKTGYDATTT	T	95					0				TGYDATTTSR	[1] Phospho (STY)	69.3236	5.8659	LLLAYEKTGYDATTT	T	95	127.401	633.624	464.515	196.337	190.416	125.528	102.619	195.236	315.398	511.65	1432.42	1209.53	187.734	373.1	311.205
5899	906.934	2	1811.85	66.8582	0.48425	4.98615	A0A0H3BZ18	Cell-division initiation protein OS=Streptococcus pyogenes serotype M49 (strain NZ131) OX=471876 GN=divIVA PE=4 SV=1	ESLSQSVILAQETAEK	ESLSQSVILAQETAEK	[4] Phospho (STY)	38.21	-1.06883	2	49.71	49.33	DEMKESLSQSVILAQ	S	68	ESLSQSVILAQETAEK	[4] Phospho (STY)	6.5783	-1.08182	2	DEMKESLSQSVILAQ	S	68								201.124	568.854	395.008	60.8121	40.287	22.6066	161.156	428.671	305.97	2571.23	4414.45	4202.86	482.054	717.057	575.017
5949	570.558	3	1708.65	19.4883	0.34075	2.49307	B5XJX2	UPF0154 protein Spy49_0296 OS=Streptococcus pyogenes serotype M49 (strain NZ131) OX=471876 GN=Spy49_0296 PE=3 SV=1	EMMSQMGQKPSEAK					0										0				EMMSQMGQKPSEAK	[2] Oxidation (M)|[3] Oxidation (M)|[6] Oxidation (M)|[11] Phospho (STY)	34.5115	1.35719	SQMGQKPSEAKIQQT	S	56	76.4398	5404.64	276.793	176.547	254.003	352.564	8.07126	21.1584	69.8191	417.67	828.417	964.324	11.2678	27.8197	50.3156
5953	1117.53	1	1116.52	56.4862	0.4843	10.0416	B5XKM7	Enolase OS=Streptococcus pyogenes serotype M49 (strain NZ131) OX=471876 GN=eno PE=3 SV=1	SIITDVYAR	SIITDVYAR	[1] Phospho (STY)	57.77	1.49776	22	100	99.1932	------MSIITDVYA	S	2					0											190.896	1227.48	958.719	757.486	797.824	695.252	615.414	1576.89	1552.02	318.899	1179.19	1293.6	118.272	362.959	458.057
5973	716.813	2	1431.61	56.4042	0.730033	3.80886	B5XJD9	Acetate kinase OS=Streptococcus pyogenes serotype M49 (strain NZ131) OX=471876 GN=ackA PE=3 SV=1	SGLSGVSGISSDMR	SGLSGVSGISSDMR	[11] Phospho (STY)	35.51	4.1026	2	49.33	47.15	SGVSGISSDMRDIEA	S	282					0											174.197	340.283	327.216	42.5865	89.2635	99.5874	76.0989	199.389	162.872	546.028	1097.86	1018.44	343.817	578.611	578.442
5976	398.224	2	794.433	51.5221	0.586483	2.07756	B5XJ51	50S ribosomal protein L6 OS=Streptococcus pyogenes serotype M49 (strain NZ131) OX=471876 GN=rplF PE=3 SV=1	LVLSVGK	LVLSVGK	[4] Phospho (STY)	24.46	3.74657	2	100	100	QGTKLVLSVGKSHQD	S	106					0											41.7844	146.505	99.8829	325.221	816.375	800.748	44.9985	82.5293	81.9325	91.713	206.656	212.415	58.0164	125.444	122.443
5982	401.533	3	1201.58	46.0115	0.504717	1.7313	B5XLJ8	L-lactate dehydrogenase OS=Streptococcus pyogenes serotype M49 (strain NZ131) OX=471876 GN=ldh PE=3 SV=1	DAAYSIINKK	DAAYSIINKK	[5] Phospho (STY)	42.59	2.52449	6	100	99.9467	SVRDAAYSIINKKGA	S	225					0											110.694	291.144	299.451	130.297	146.623	298.187	162.765	271.041	347.016	618.219	859.282	1644.5	159.986	377.024	470.013
5986	953.922	2	1905.83	52.5107	0.783883	4.98615	B5XKM7	Enolase OS=Streptococcus pyogenes serotype M49 (strain NZ131) OX=471876 GN=eno PE=3 SV=1	GMVPSGASTGEHEAVELR	GMVPSGASTGEHEAVELR	[8] Phospho (STY)	110.58	0.63217	3	98.28	90.6567	GMVPSGASTGEHEAV	S	42	GMVPSGASTGEHEAVELR	[8] Phospho (STY)	7.7212	0.672293	2	GMVPSGASTGEHEAV	S	42								4.02377	4.64044	54.6601	23.2774	50.104	11.8708	20.4168	34.0425	9.67682	159.809	574.918	491.689	0	42.4806	10.8748
6008	655.951	3	1964.83	73.7603	0.709517	3.3241	A0A0H3BY92	Uncharacterized protein OS=Streptococcus pyogenes serotype M49 (strain NZ131) OX=471876 GN=Spy49_1318c PE=4 SV=1	ATTSSCPSPEAFLQAYR	ATTSSCPSPEAFLQAYR	[5] Phospho (STY)|[6] Carbamidomethyl (C)	38.37	-0.661345	3	30.77	28.9067	SSKATTSSCPSPEAF	S	64					0											30.6503	252.126	269.229	40.2969	55.6028	418.944	133.367	283.343	424.835	1247.36	2665.65	7624.24	41.8883	474.698	684.137
6010	624.618	3	1870.83	48.1666	0.525267	3.04709	B5XIW7	60 kDa chaperonin OS=Streptococcus pyogenes serotype M49 (strain NZ131) OX=471876 GN=groL PE=3 SV=1	DSTVIVEGSGSSEAIANR	DSTVIVEGSGSSEAIANR	[12] Phospho (STY)	56.86	0.258739	5	49.29	47.704	IVEGSGSSEAIANRI	S	337	DSTVIVEGSGSSEAIANR	[11] Phospho (STY)	8.1883	0.24616	8	VIVEGSGSSEAIANR	S	336								231.21	459.35	469.932	167.913	183.318	370.684	274.203	502.268	532.559	1099.06	1384.77	1933.61	197.672	415.858	404.807
6011	820.818	2	1639.62	68.6109	0.886667	4.36288	B5XLC6	Elongation factor 4 OS=Streptococcus pyogenes serotype M49 (strain NZ131) OX=471876 GN=lepA PE=3 SV=1	GDFVTMDYIDDNR	GDFVTMDYIDDNR	[5] Phospho (STY)	63.13	-0.196835	5	100	99.988	RRRGDFVTMDYIDDN	T	440					0											64.2818	1.03305	214.538	127.089	144.534	122.948	28.643	230.503	274.9	1953.22	4682.34	4939.49	76.1645	256.519	217.397
6038	1000.76	3	2999.26	68.8566	0.3819	4.63989	A0A0H3BZC1	Uncharacterized protein OS=Streptococcus pyogenes serotype M49 (strain NZ131) OX=471876 GN=Spy49_0377 PE=4 SV=1	METFESDDAVDFDTKVMTLPEKDEK	METFESDDAVDFDTKVMTLPEKDEK	[14] Phospho (STY)	27.19	-2.18463	2	84.49	83.615	DDAVDFDTKVMTLPE	T	30					0											711.197	0	381.878	1027.26	432.694	472.951	729.464	1219.03	1528.23	0	73.6105	62.2412	3984.95	5110.95	4314.23
6055	550.271	3	1647.79	77.5729	0.525217	2.63158	A0A0H3BZ23	Cell division protein FtsZ OS=Streptococcus pyogenes serotype M49 (strain NZ131) OX=471876 GN=ftsZ PE=3 SV=1	AFSFDTASIQGAIIK	AFSFDTASIQGAIIK	[6] Phospho (STY)	95.23	0.87892	12	99.87	97.1642	-MAFSFDTASIQGAI	T	7	AFSFDTASIQGAIIK	[6] Phospho (STY)	7.9435	0.864639	14	-MAFSFDTASIQGAI	T	7								705.489	1743.77	1614.29	236.921	152.408	610.074	439.099	673.924	1158.27	17.0914	98.3564	420.016	1738.36	2981.52	4115.71
6065	770.012	3	2307.01	42.5806	0.525217	4.08587	A0A0H3BZ23	Cell division protein FtsZ OS=Streptococcus pyogenes serotype M49 (strain NZ131) OX=471876 GN=ftsZ PE=3 SV=1	TFTQTNAQQVAGAQYASDQAK					0						TFTQTNAQQVAGAQYASDQAK	[15] Phospho (STY)	6.9455	-0.82596	4	QQVAGAQYASDQAKQ	Y	346								283.702	776.113	565.774	433.318	402.124	403.174	281.895	494.045	451.486	626.924	1155.84	1113.35	368.813	538.928	560.485
6101	579.586	3	1735.74	42.2734	0.566	2.56233	B5XIW7	60 kDa chaperonin OS=Streptococcus pyogenes serotype M49 (strain NZ131) OX=471876 GN=groL PE=3 SV=1	SQLETTTSDFDREK					0						SQLETTTSDFDREK	[1] Phospho (STY)	6.9906	3.21212	3	NRIALIKSQLETTTS	S	349	SQLETTTSDFDREK	[1] Phospho (STY)	49.2832	3.185	NRIALIKSQLETTTS	S	349	229.148	868.061	620.052	309.654	243.215	262.041	469.456	958.93	860.199	958.157	1531.18	1761.26	330.173	580.906	534.923
6219	791.335	3	2370.98	57.9801	0.586717	4.15512	B5XKI2	Triosephosphate isomerase OS=Streptococcus pyogenes serotype M49 (strain NZ131) OX=471876 GN=tpiA PE=3 SV=1	VAAQNCYFENTGAFTGETSPK					0						VAAQNCYFENTGAFTGETSPK	[6] Carbamidomethyl (C)|[11] Phospho (STY)	7.4799	-0.193604	4	QNCYFENTGAFTGET	T	72								401.365	899.322	774.655	278.943	217.984	318.252	173.137	409.148	448.245	338.316	758.227	871.78	405.294	677.014	722.269
6227	812.39	2	1622.77	56.2402	0.620267	4.43213	B5XMC3	Arginine deiminase OS=Streptococcus pyogenes serotype M49 (strain NZ131) OX=471876 GN=arcA PE=3 SV=1	TAQTPIHVYSEIGK					0						TAQTPIHVYSEIGK	[1] Phospho (STY)	7.5979	-3.0609	4	------MTAQTPIHV	T	2								405.908	709.242	554.595	340.454	341.979	250.4	177.597	350.905	213.464	1579.48	2659.22	1987.62	381.517	498.484	326.982
6238	668.355	2	1334.7	36.9475	0.389067	3.60111	A0A0H3BYB7	LSU ribosomal protein L23p (L23Ae) OS=Streptococcus pyogenes serotype M49 (strain NZ131) OX=471876 GN=rplW PE=3 SV=1	VASVNTVNVKPK					0						VASVNTVNVKPK	[3] Phospho (STY)	6.425	-0.134286	2	FDGVKVASVNTVNVK	S	53								103.542	156.468	141.614	17.4832	16.1725	22.8808	59.6072	88.6469	71.8888	75.8416	147.33	117.067	42.869	110.788	151.354
6247	813.393	2	1624.77	33.9395	0.34825	4.50139	A0A0H3C1S0	CsbD domain-containing protein OS=Streptococcus pyogenes serotype M49 (strain NZ131) OX=471876 GN=Spy49_1665c PE=3 SV=1	EGAGKLTGDKELEAK	EGAGKLTGDKELEAK	[7] Phospho (STY)	64.49	-0.268568	3	100	100	KEGAGKLTGDKELEA	T	25	EGAGKLTGDKELEAK	[7] Phospho (STY)	7.3796	-0.283052	5	KEGAGKLTGDKELEA	T	25	EGAGKLTGDKELEAK	[7] Phospho (STY)	54.1908	-0.31202	KEGAGKLTGDKELEA	T	25	68.2048	248.125	194.492	124.27	120.199	94.8412	9.12146	148.1	148.099	144.317	410.385	309.333	125.887	171.158	198.175
6278	638.625	3	1912.85	54.5627	0.60695	2.77008	B5XKI1	Elongation factor Tu OS=Streptococcus pyogenes serotype M49 (strain NZ131) OX=471876 GN=tuf PE=3 SV=1	GITINTAHVEYETETR					0						GITINTAHVEYETETR	[6] Phospho (STY)	6.6629	-1.74426	2	ERGITINTAHVEYET	T	68								272.598	467.246	461.753	132.919	140.186	139.939	125.391	393.427	381.187	424.957	608.287	797.726	405.329	651.891	591.321
6411	763.362	2	1524.71	67.8268	0.545583	4.36288	A0A0H3C129	3-oxoacyl-[acyl-carrier-protein] reductase OS=Streptococcus pyogenes serotype M49 (strain NZ131) OX=471876 GN=fabG PE=3 SV=1	MQEQILSQIPMK					0						MQEQILSQIPMK	[7] Phospho (STY)	6.2391	0.290352	2	KMQEQILSQIPMKRI	S	204								69.5933	24.3412	162.226	102.165	46.6579	66.8467	20.4915	42.7439	93.0975	738.022	1309.16	1605.98	140.712	343.988	260.659
6412	830.415	2	1658.82	53.9221	0.3817	4.50139	A0A0H3BZC7	EIIAB-Man OS=Streptococcus pyogenes serotype M49 (strain NZ131) OX=471876 GN=manL PE=4 SV=1	LLHGQVATAWTPASK	LLHGQVATAWTPASK	[8] Phospho (STY)	43.5	-1.53954	4	99.77	97.6175	LLHGQVATAWTPASK	T	186	LLHGQVATAWTPASK	[8] Phospho (STY)	7.8581	-1.55373	11	LLHGQVATAWTPASK	T	186								280.043	80.0587	432.168	237.471	222.002	9.28188	95.9058	407.735	247.251	492.219	1095.58	645.449	387.419	472.047	239.606
6440	459.693	2	917.371	44.2103	0.804633	2.14681	B5XJ99	30S ribosomal protein S4 OS=Streptococcus pyogenes serotype M49 (strain NZ131) OX=471876 GN=rpsD PE=3 SV=1	YTGPSWK	YTGPSWK	[5] Phospho (STY)	26.94	2.45325	2	98.85	98.595	MSRYTGPSWKQSRRL	S	8					0											186.605	243.471	301.401	279.722	340.517	306.332	62.0105	173.991	230.82	125.137	277.583	291.981	147.654	265.561	281.588
6503	933.449	2	1864.88	51.3787	0.566	4.9169	B5XJR0	30S ribosomal protein S7 OS=Streptococcus pyogenes serotype M49 (strain NZ131) OX=471876 GN=rpsG PE=3 SV=1	VGGSNYQVPVEVRPER	VGGSNYQVPVEVRPER	[4] Phospho (STY)	78.49	0.165997	7	100	99.9629	RARRVGGSNYQVPVE	S	83	VGGSNYQVPVEVRPER	[4] Phospho (STY)	7.7474	0.207001	11	RARRVGGSNYQVPVE	S	83								97.7223	262.809	151.504	150.408	126.5	36.6824	8.69592	143.474	38.3618	501.364	879.06	522.681	127.837	148.501	74.7719
6562	1254.55	1	1253.54	28.367	0.34075	9.8338	A0A0H3BZL9	PTS system_ fructose-specific IIABC component OS=Streptococcus pyogenes serotype M49 (strain NZ131) OX=471876 GN=fruA PE=4 SV=1	VETNGASGVANR	VETNGASGVANR	[7] Phospho (STY)	81.12	-0.493299	23	100	95.5435	KVETNGASGVANRLT	S	205	VETNGASGVANR	[7] Phospho (STY)	7.361	-0.512072	16	KVETNGASGVANRLT	S	205								0	132.871	112.173	11.5897	4.04865	7.98921	0	24.5373	43.6891	494.289	1397.58	1656.77	46.0852	113.63	201.255
6719	683.822	2	1365.63	37.916	0.409833	3.53186	B5XJ39	50S ribosomal protein L2 OS=Streptococcus pyogenes serotype M49 (strain NZ131) OX=471876 GN=rplB PE=3 SV=1	AAGASAQVLGQEGK	AAGASAQVLGQEGK	[5] Phospho (STY)	68.38	0.470415	3	100	100	LVRAAGASAQVLGQE	S	161	AAGASAQVLGQEGK	[5] Phospho (STY)	7.7905	0.453182	3	LVRAAGASAQVLGQE	S	161								36.667	161.202	113.123	99.7806	72.7527	143.698	8.17879	46.3849	32.64	121.87	216.613	261.993	26.818	88.7812	46.9268
6730	535.766	2	1069.52	26.3896	0.402267	2.83934	A0A0H3BXP9	Putative rhamnosyltransferase OS=Streptococcus pyogenes serotype M49 (strain NZ131) OX=471876 GN=rgpAc PE=4 SV=1	LTTADSKVR	LTTADSKVR	[6] Phospho (STY)	29.53	1.41799	2	99.4	99.02	SRLTTADSKVRAYFQ	S	196					0											40.6602	173.354	123.422	68.2539	70.9493	54.5671	31.3079	95.5937	76.6329	551.011	1038.64	1005.13	52.8239	111.089	71.4888
6744	773.387	2	1544.76	57.5908	0.60745	4.15512	B5XJ35	30S ribosomal protein S10 OS=Streptococcus pyogenes serotype M49 (strain NZ131) OX=471876 GN=rpsJ PE=3 SV=1	TGATVAGPVPLPTER					0						TGATVAGPVPLPTER	[13] Phospho (STY)	7.0383	0.0941871	3	AGPVPLPTERSLYTI	T	44								0	7.88305	4.91542	19.6199	37.9074	23.88	0	3.80214	3.68451	4.87263	53.1923	11.4633	0	0	1.29185
6794	1011.92	2	2021.84	68.0857	0.579167	5.26316	A0A0H3BXS5	Protein-export membrane protein SecG OS=Streptococcus pyogenes serotype M49 (strain NZ131) OX=471876 GN=Spy49_0421 PE=3 SV=1	NPSSNVFDSSGSEALFER					0						NPSSNVFDSSGSEALFER	[9] Phospho (STY)	7.0248	-0.780709	4	PSSNVFDSSGSEALF	S	35								607.675	1410.83	1043.87	562.011	572.948	416.6	368.07	854.358	636.449	654.462	1359.11	912.298	779.619	860.974	648.551
6832	604.96	3	1811.86	66.8582	0.48425	3.11634	A0A0H3BZ18	Cell-division initiation protein OS=Streptococcus pyogenes serotype M49 (strain NZ131) OX=471876 GN=divIVA PE=4 SV=1	ESLSQSVILAQETAEK	ESLSQSVILAQETAEK	[4] Phospho (STY)	38.21	2.06929	2	49.71	49.33	DEMKESLSQSVILAQ	S	68	ESLSQSVILAQETAEK	[4] Phospho (STY)	6.5783	2.0563	2	DEMKESLSQSVILAQ	S	68								171.777	350.831	306.797	1237.5	1269	1660.96	86.0782	200.438	233.702	1420.76	1970.55	3008.73	315.045	625.032	528.533
6926	1007.41	2	2012.8	50.1238	0.443133	5.47091	B5XJR1	Elongation factor G OS=Streptococcus pyogenes serotype M49 (strain NZ131) OX=471876 GN=fusA PE=3 SV=1	LYDGSYHDVDSSETAFK	LYDGSYHDVDSSETAFK	[14] Phospho (STY)	90.35	0.420624	3	99.01	55.7067	HDVDSSETAFKIAAS	T	578	LYDGSYHDVDSSETAFK	[14] Phospho (STY)	7.634	0.458614	3	HDVDSSETAFKIAAS	T	578	LYDGSYHDVDSSETAFK	[12] Phospho (STY)	45.4238	0.446922	SYHDVDSSETAFKIA	S	576	2.34842	45.0427	32.7876	0	4.97668	0	0	10.3646	0	26.984	160.589	90.4266	12.8556	20.0773	24.3346
6934	605.277	3	1812.81	63.2234	0.504567	2.70083	B5XL08	Phosphopentomutase OS=Streptococcus pyogenes serotype M49 (strain NZ131) OX=471876 GN=deoB PE=3 SV=1	HDYAVSPFQDTVLNK					0						HDYAVSPFQDTVLNK	[6] Phospho (STY)	6.5001	0.00149309	2	NRHDYAVSPFQDTVL	S	227								100.234	366.128	347.25	215.93	238.145	198.495	44.9287	136.814	163.885	1211.54	1955.87	2467.6	223.202	345.988	395.14
6954	598.269	2	1194.52	78.098	0.545633	3.25485	A0A0H3BXC6	Signal recognition particle receptor FtsY OS=Streptococcus pyogenes serotype M49 (strain NZ131) OX=471876 GN=ftsY PE=3 SV=1	LNSFFANFR	LNSFFANFR	[3] Phospho (STY)	51.1	1.44846	6	100	100	GFSARLNSFFANFRR	S	232					0											62.3143	313.209	266.77	134.785	97.7703	136.543	82.1271	192.594	151.07	685.159	1434.36	1710.73	176.536	274.663	267.973
6989	554.793	2	1107.57	67.7448	0.504633	3.1856	B5XIK9	30S ribosomal protein S15 OS=Streptococcus pyogenes serotype M49 (strain NZ131) OX=471876 GN=rpsO PE=3 SV=1	ELIQSLGLR	ELIQSLGLR	[5] Phospho (STY)	23.05	1.71179	2	100	100	RYRELIQSLGLRR--	S	84					0											47.1884	115.945	67.432	394.202	325.704	263.051	4.85724	56.9661	27.8395	285.924	481.021	614.14	40.4096	116.929	86.0267
7088	407.561	3	1219.66	51.5425	0.484083	2.21607	A0A0H3C2S7	Uncharacterized protein OS=Streptococcus pyogenes serotype M49 (strain NZ131) OX=471876 GN=Spy49_1801c PE=4 SV=1	NKETLVIPVK	NKETLVIPVK	[4] Phospho (STY)	42.76	2.16314	4	100	100	EVSKNKETLVIPVKT	T	125					0											665.56	1446.42	1165.91	313.242	305.031	379.886	393.051	605.914	594.085	103.278	151.491	235.342	796.332	1318.53	1205.55
7170	573.934	3	1718.78	35.7741	0.586933	2.63158	A0A0H3BYY9	Superoxide dismutase OS=Streptococcus pyogenes serotype M49 (strain NZ131) OX=471876 GN=sodM PE=3 SV=1	HHATYVANTNAALEK					0						HHATYVANTNAALEK	[4] Phospho (STY)	7.2732	0.732519	2	HHDKHHATYVANTNA	T	34								114.405	254.501	245.907	123.331	136.29	121.785	53.2717	208.993	130.21	509.317	947.05	923.005	171.849	293.375	274.786
7243	421.19	2	840.365	63.121	0.8658	2.28532	A0A0H3BVE1	30S ribosomal protein S5 OS=Streptococcus pyogenes serotype M49 (strain NZ131) OX=471876 GN=rpsE PE=3 SV=1	GISVSDLA	GISVSDLA	[3] Phospho (STY)	41.53	2.78177	4	99.46	97.4975	VAALRGISVSDLA--	S	159					0											119.667	246.237	210.807	145.233	116.168	142.898	88.6653	142.651	161.263	613.659	1102.28	1298.3	113.062	224.589	250.173
7264	448.87	3	1343.59	27.665	0.3817	1.93906	A0A0H3BZR7	Mid-cell-anchored protein Z OS=Streptococcus pyogenes serotype M49 (strain NZ131) OX=471876 GN=mapZ PE=3 SV=1	SEESKEVEVTK	SEESKEVEVTK	[1] Phospho (STY)	81.94	2.13434	11	99.95	96.2145	------MSEESKEVE	S	2					0											299.026	629.026	612.512	311.987	390.959	643.114	659.132	837.825	1106.09	270.301	536.275	868.513	312.801	585.505	909.917
7282	408.882	3	1223.62	45.6837	0.6071	2.00831	A0A0H3C2S7	Uncharacterized protein OS=Streptococcus pyogenes serotype M49 (strain NZ131) OX=471876 GN=Spy49_1801c PE=4 SV=1	TVGLDSKSPLK	TVGLDSKSPLK	[6] Phospho (STY)	31.42	5.91954	2	92.93	92.53	VKTVGLDSKSPLKTI	S	137	TVGLDSKSPLK	[6] Phospho (STY)	6.9383	5.98204	3	VKTVGLDSKSPLKTI	S	137								275.735	459.926	518.533	1762.6	1579.99	2121.66	192.446	281.199	368.165	108.118	227.147	353.474	386.96	792.263	892.236
7298	993.395	2	1984.78	56.1788	0.722667	5.33241	A0A0H3BZC1	Uncharacterized protein OS=Streptococcus pyogenes serotype M49 (strain NZ131) OX=471876 GN=Spy49_0377 PE=4 SV=1	RMETFESDDAVDFDTK	RMETFESDDAVDFDTK	[15] Phospho (STY)	35.62	-0.272657	3	99.82	99.7533	DDAVDFDTKVMTLPE	T	30					0											2271.6	87.678	2033.89	1602.63	1245.5	553.315	1975.52	2538.87	1915.97	203.898	398.802	214.657	2733.52	2483.97	1882.52
7333	723.318	2	1444.62	38.3184	0.484317	3.80886	A0A0H3BY55	Non-specific serine/threonine protein kinase OS=Streptococcus pyogenes serotype M49 (strain NZ131) OX=471876 GN=Spy49_1257c PE=4 SV=1	TNYQTDQVAVAR	TNYQTDQVAVAR	[5] Phospho (STY)	29.85	-9.87784	2	98.45	97.55	VLRTNYQTDQVAVAR	T	50					0											283.429	969.332	737.386	659.711	599.495	347.238	379.629	653.999	618.639	679.881	1215.98	978.331	714.809	1068.87	936.333
7446	969.418	2	1936.82	49.7626	0.286683	5.12465	A0A0H3BZL9	PTS system_ fructose-specific IIABC component OS=Streptococcus pyogenes serotype M49 (strain NZ131) OX=471876 GN=fruA PE=4 SV=1	EEQTSTGLGDGIAMPHSK					0						EEQTSTGLGDGIAMPHSK	[17] Phospho (STY)	7.0446	-1.45832	11	DGIAMPHSKNIVVDK	S	68								216.991	27.0231	178.79	130.444	52.4468	41.7312	104.112	166.519	153.468	458.353	450.047	444.446	194.962	230.466	225.917
7538	432.892	3	1295.65	32.9913	0.430267	2.35457	B5XJ52	50S ribosomal protein L18 OS=Streptococcus pyogenes serotype M49 (strain NZ131) OX=471876 GN=rplR PE=3 SV=1	GTKTEQAVVVGK	GTKTEQAVVVGK	[4] Phospho (STY)	42.09	3.64786	3	94.57	76.0667	DVSKGTKTEQAVVVG	T	69					0											122.902	325.034	229.126	347.496	288.573	407.895	95.3158	173.7	249.301	85.4215	167.3	281.602	246.793	396.18	397.201
7681	969.429	2	1936.84	67.2605	0.7843	5.33241	A0A0H3BZS4	dTDP-4-dehydrorhamnose 3_5-epimerase OS=Streptococcus pyogenes serotype M49 (strain NZ131) OX=471876 GN=rmlC PE=4 SV=1	EGETFGNVYQTVIDASK					0						EGETFGNVYQTVIDASK	[9] Phospho (STY)	6.7974	-0.996505	3	GETFGNVYQTVIDAS	Y	109								11.5974	107.237	123.923	13.4702	10.697	0	15.3489	80.2095	82.6113	1347.81	2586.12	2447.7	34.0266	143.441	84.9577
7693	785.846	2	1569.68	46.9802	0.463867	4.36288	A0A0H3BZ18	Cell-division initiation protein OS=Streptococcus pyogenes serotype M49 (strain NZ131) OX=471876 GN=divIVA PE=4 SV=1	ATYDAQHLLDESK	ATYDAQHLLDESK	[3] Phospho (STY)	44.01	4.17711	2	99.99	99.955	NLVSKATYDAQHLLD	Y	98	ATYDAQHLLDESK	[3] Phospho (STY)	6.9042	4.16212	3	NLVSKATYDAQHLLD	Y	98								118.643	356.155	185.542	161.565	100.275	40.0808	61.0596	138.551	101.047	1760.37	3169.04	2381.76	205.261	286.562	236.011
7771	1014.95	2	2027.88	44.4358	0.545783	5.67867	A0A0H3BYR4	Putative cytoplasmic membrane protein OS=Streptococcus pyogenes serotype M49 (strain NZ131) OX=471876 GN=lemA PE=3 SV=1	VANASTPQETMAASNELSK					0						VANASTPQETMAASNELSK	[14] Phospho (STY)	6.1988	-1.27899	4	PQETMAASNELSKQV	S	91								69.3248	0	137.809	89.0508	64.6776	4.8126	157.851	347.792	239.51	1229.25	2375.87	1537.77	168.629	217.666	113.284
7777	692.302	3	2073.88	59.2687	0.443133	3.1856	A0A0H3BZC7	EIIAB-Man OS=Streptococcus pyogenes serotype M49 (strain NZ131) OX=471876 GN=manL PE=4 SV=1	FAEGIHQSGSMIFGEQEK					0						FAEGIHQSGSMIFGEQEK	[8] Phospho (STY)	6.8367	-1.39836	2	FAEGIHQSGSMIFGE	S	20								326.465	95.1387	618.554	492.236	454.821	468.78	229.736	418.077	490.859	456.03	770.037	1232.35	563.915	861.925	871.853
7803	1154.51	2	2307.01	44.9201	0.42285	6.16343	A0A0H3BZ23	Cell division protein FtsZ OS=Streptococcus pyogenes serotype M49 (strain NZ131) OX=471876 GN=ftsZ PE=3 SV=1	TFTQTNAQQVAGAQYASDQAK	TFTQTNAQQVAGAQYASDQAK	[17] Phospho (STY)	56.24	-1.77262	10	100	98.542	VAGAQYASDQAKQSV	S	348	TFTQTNAQQVAGAQYASDQAK	[17] Phospho (STY)	7.6188	-1.73948	16	VAGAQYASDQAKQSV	S	348								56.9758	225.504	159.811	34.7836	12.0903	0	36.1457	148.991	79.5551	629.621	1303.38	971.635	58.0343	119.972	117.228
7835	537.731	2	1073.45	23.3279	0.504683	2.63158	A0A0H3BYQ9	PTS system, IIB component OS=Streptococcus pyogenes serotype M49 (strain NZ131) OX=471876 GN=Spy49_0834 PE=4 SV=1	FDKSDPASK	FDKSDPASK	[8] Phospho (STY)	57.05	4.04898	2	99.97	99.035	FDKSDPASKVKVTPS	S	116					0											53.6402	273.21	185.348	25.9294	5.91321	9.61471	24.3498	82.7451	134.068	1104.98	2094.61	1813.76	102.867	179.098	172.87
7885	476.256	2	950.497	53.1717	0.6816	2.49307	B5XI03	GTP-sensing transcriptional pleiotropic repressor CodY OS=Streptococcus pyogenes serotype M49 (strain NZ131) OX=471876 GN=codY PE=3 SV=1	SVIVNALR	SVIVNALR	[1] Phospho (STY)	36.73	2.59609	2	100	100	DRIGITRSVIVNALR	S	219					0											37.7468	140.929	87.423	1733.3	1454.05	1515.32	14.7029	80.0847	94.6204	78.0242	158.82	155.906	101.483	186.229	191.342
8071	901.87	2	1801.72	30.2909	0.648	4.77839	B5XJ72	DNA-directed RNA polymerase subunit beta OS=Streptococcus pyogenes serotype M49 (strain NZ131) OX=471876 GN=rpoB PE=3 SV=1	QAQETQEVSETTDEK					0						QAQETQEVSETTDEK	[5] Phospho (STY)	6.4581	-0.323832	2	REKQAQETQEVSETT	T	1178								27.726	183.061	161.385	60.805	32.3428	17.8647	15.4382	143.57	87.2529	411.727	851.872	644.014	52.7376	108.426	74.1907
8150	411.196	3	1230.57	43.3853	0.48425	2.07756	B5XLE2	50S ribosomal protein L10 OS=Streptococcus pyogenes serotype M49 (strain NZ131) OX=471876 GN=rplJ PE=3 SV=1	SLRESGVEFK	SLRESGVEFK	[5] Phospho (STY)	28.42	0.979621	3	92.47	64.1567	LRRSLRESGVEFKVI	S	49					0											63.532	158.49	111.836	163.892	94.4076	257.634	29.0305	65.5335	52.8176	60.3008	97.3091	149.864	43.327	93.5268	115.842
8289	528.263	3	1581.77	65.1395	0.4097	2.77008	A0A0H3BYB3	APH domain-containing protein OS=Streptococcus pyogenes serotype M49 (strain NZ131) OX=471876 GN=Spy49_1343c PE=4 SV=1	TTTEQELTLTPLR	TTTEQELTLTPLR	[2] Phospho (STY)	96.61	1.20236	24	49.74	48.4533	-----MTTTEQELTL	T	3	TTTEQELTLTPLR	[1] Phospho (STY)	6.8182	1.18748	2	------MTTTEQELT	T	2								347.827	435.598	517.255	291.131	228.218	732.986	73.671	295.228	579.259	30.7321	154.16	664.956	117.302	778.929	1263.21
8372	463.722	2	925.429	43.6646	0.402317	2.35457	A0A0H3C281	50S ribosomal protein L13 OS=Streptococcus pyogenes serotype M49 (strain NZ131) OX=471876 GN=rplM PE=3 SV=1	SITAGELR	SITAGELR	[3] Phospho (STY)	26.38	2.57392	2	90.66	90.5	PGGLKSITAGELRSK	T	90					0											9.80035	11.178	12.5067	223.451	282.367	243.505	6.62217	8.28995	21.7499	12.2092	47.0142	48.0355	5.84578	18.5519	8.21063
8381	965.433	2	1928.85	52.5312	0.545517	5.40166	A0A0H3BWK0	PTS system_ IIB component OS=Streptococcus pyogenes serotype M49 (strain NZ131) OX=471876 GN=Spy49_0154 PE=4 SV=1	QLGVTDIQSASCSVGEAK					0						QLGVTDIQSASCSVGEAK	[11] Phospho (STY)|[12] Carbamidomethyl (C)	6.5712	-1.39307	2	VTDIQSASCSVGEAK	S	38								296.197	1891.61	789.059	238.274	314.216	315.36	132.469	401.401	313.015	2571.56	4001.49	3172	212.419	388.38	243.551
8383	751.848	2	1501.68	47.3209	0.409717	4.08587	B5XKI1	Elongation factor Tu OS=Streptococcus pyogenes serotype M49 (strain NZ131) OX=471876 GN=tuf PE=3 SV=1	GEVYILSKDEGGR					0						GEVYILSKDEGGR	[7] Phospho (STY)	7.419	0.33389	2	KGEVYILSKDEGGRH	S	317								45.1044	212.04	168.37	216.964	361.398	291.293	53.1294	217.99	137.815	556.485	1118.84	834.169	55.416	93.0469	87.532
8386	982.931	2	1963.85	71.0935	0.607067	5.33241	B5XJ39	50S ribosomal protein L2 OS=Streptococcus pyogenes serotype M49 (strain NZ131) OX=471876 GN=rplB PE=3 SV=1	NMTSLDFAEITTSTPEK					0						NMTSLDFAEITTSTPEK	[13] Phospho (STY)	7.7641	-0.256318	5	DFAEITTSTPEKSLL	S	27								0	0	0	0	0	0	0	0	0	676.698	1141.56	764.803	11.5806	27.3455	33.186
8410	814.904	2	1627.79	58.6004	0.361233	4.57064	B5XJ47	50S ribosomal protein L24 OS=Streptococcus pyogenes serotype M49 (strain NZ131) OX=471876 GN=rplX PE=3 SV=1	EAPIHVSNVQVLDK					0						EAPIHVSNVQVLDK	[7] Phospho (STY)	6.8089	-1.99679	2	KEAPIHVSNVQVLDK	S	66								8.77814	56.7365	21.1445	84.9063	80.2074	81.7953	4.09644	24.3905	0	83.1521	207.135	135.538	7.82707	10.9882	4.91177
8535	956.969	2	1911.92	64.5939	0.30715	5.60942	A0A0H3BXH0	Endolytic murein transglycosylase OS=Streptococcus pyogenes serotype M49 (strain NZ131) OX=471876 GN=mltG PE=3 SV=1	DAVMTSEALKPTLLSEK					0						DAVMTSEALKPTLLSEK	[5] Phospho (STY)	5.9592	-1.76695	5	AIKDAVMTSEALKPT	T	89								714.053	34.5284	1043.28	201.394	116.254	56.1072	541.856	985.956	863.855	0	17.8171	26.0717	846.808	1052.74	853.785
8597	535.934	3	1604.78	57.9801	0.92745	2.70083	A0A0H3BY55	Non-specific serine/threonine protein kinase OS=Streptococcus pyogenes serotype M49 (strain NZ131) OX=471876 GN=Spy49_1257c PE=4 SV=1	LSPPTPTVLTQESR					0						LSPPTPTVLTQESR	[13] Phospho (STY)	5.7114	-0.745772	3	PTVLTQESRLDQTNQ	S	319								1126.84	1828.04	1974.13	350.808	416.935	1122.37	876.82	1216.47	1800.92	78.7944	236.861	719.206	792.966	1787.56	2336.42
8628	737.831	2	1473.65	69.1566	0.607117	3.80886	A0A0H3BWG0	DNA-directed RNA polymerase subunit beta' OS=Streptococcus pyogenes serotype M49 (strain NZ131) OX=471876 GN=rpoC PE=3 SV=1	GNISNFSQLAGMR	GNISNFSQLAGMR	[4] Phospho (STY)	47.31	2.97131	3	99.77	97.5967	SGARGNISNFSQLAG	S	731	GNISNFSQLAGMR	[7] Phospho (STY)	6.5317	2.95534	2	RGNISNFSQLAGMRG	S	734								4.78961	76.5958	28.9661	750.741	771.374	885.241	0	12.6252	15.8094	9.79382	102.727	59.6177	25.297	37.0289	118.587
8702	501.239	2	1000.46	44.0538	0.586883	2.56233	B5XKI2	Triosephosphate isomerase OS=Streptococcus pyogenes serotype M49 (strain NZ131) OX=471876 GN=tpiA PE=3 SV=1	AFVEAVASK	AFVEAVASK	[8] Phospho (STY)	24.33	1.22599	2	100	100	AFVEAVASKLPSTDL	S	29					0											72.3972	158.124	122.746	128.236	102.247	107.218	61.4846	131.904	134.732	304.334	558.675	511.907	95.0759	170.708	157.405
8833	375.991	5	1874.92	38.6256	0.825083	1.93906	B5XKI1	Elongation factor Tu OS=Streptococcus pyogenes serotype M49 (strain NZ131) OX=471876 GN=tuf PE=3 SV=1	SKPHVNIGTIGHVDHGK	SKPHVNIGTIGHVDHGK	[1] Phospho (STY)	68.6	2.31134	4	100	99.39	AKEKYDRSKPHVNIG	S	9					0											1.81833	226.828	247.099	161.958	165.062	255.199	4.81116	76.5948	130.334	398.736	817.528	1105.83	134.441	249.075	270.761
8835	547.803	2	1093.59	62.8622	0.627433	2.97784	A0A0H3C281	50S ribosomal protein L13 OS=Streptococcus pyogenes serotype M49 (strain NZ131) OX=471876 GN=rplM PE=3 SV=1	LSAVVASVLR	LSAVVASVLR	[7] Phospho (STY)	34.24	1.53566	2	99.9	99.85	RLSAVVASVLRGKNK	S	36					0											3.42725	50.6061	29.3687	504.173	437.221	494.924	0	20.4274	24.981	0	3.38632	7.96008	3.21176	31.6572	23.1212
8883	764.37	2	1526.72	38.6666	0.3613	4.22438	A0A0H3BZ61	F420_ligase domain-containing protein OS=Streptococcus pyogenes serotype M49 (strain NZ131) OX=471876 GN=Spy49_0453 PE=4 SV=1	KTEVIDSQGETIK					0						KTEVIDSQGETIK	[7] Phospho (STY)	6.688	1.31306	2	RKTEVIDSQGETIKF	S	189								0	5.16181	0	0	0	0	8.60326	15.5959	1.62474	0	0	0	0	0	0
8941	884.412	1	883.405	43.1803	0.402333	8.03324	B5XMA2	UDP-N-acetylglucosamine--N-acetylmuramyl-(pentapeptide) pyrophosphoryl-undecaprenol N-acetylglucosamine transferase OS=Streptococcus pyogenes serotype M49 (strain NZ131) OX=471876 GN=murG PE=3 SV=1	ADISSAIK	ADISSAIK	[4] Phospho (STY)	54.01	-0.0149913	6	96.43	94.4033	DLLRADISSAIKEK-	S	354					0											0	5.23328	6.53049	0	0	0	0	16.1102	22.8622	107.107	416.287	369.696	4.83892	7.19174	13.9133
8954	1011.92	2	2021.83	70.2275	0.504717	5.26316	A0A0H3BXS5	Protein-export membrane protein SecG OS=Streptococcus pyogenes serotype M49 (strain NZ131) OX=471876 GN=Spy49_0421 PE=3 SV=1	NPSSNVFDSSGSEALFER					0						NPSSNVFDSSGSEALFER	[9] Phospho (STY)	6.6949	-1.58549	2	PSSNVFDSSGSEALF	S	35								342.352	932.934	707.437	325.707	275.563	178.457	169.752	490.027	351.836	323.735	939.747	725.441	539.047	617.22	483.969
9190	734.839	2	1467.66	51.2354	0.783883	3.94737	B5XIW7	60 kDa chaperonin OS=Streptococcus pyogenes serotype M49 (strain NZ131) OX=471876 GN=groL PE=3 SV=1	VGNDGVITIEESR					0						VGNDGVITIEESR	[12] Phospho (STY)	7.4594	1.95359	3	GVITIEESRGMETEL	S	178								41.7087	299.809	200.148	165.091	177.941	189.519	33.2572	143.177	102.191	47.389	179.179	181.904	63.1259	158.311	103.486
9204	569.272	3	1704.79	41.9941	0.0409667	2.70083	A0A0H3BYA0	PTS system, IIB component, putative OS=Streptococcus pyogenes serotype M49 (strain NZ131) OX=471876 GN=Spy49_1328c PE=4 SV=1	ILAACGAGVNSSHQIK					0										0				ILAACGAGVNSSHQIK	[5] Carbamidomethyl (C)|[12] Phospho (STY)	17.4723	-4.24165	CGAGVNSSHQIKDAI	S	15	104.134	120.415	104.062	148.28	118.157	91.6189	53.1801	59.3985	89.4237	389.542	435.259	405.884	86.8954	92.2338	88.9587
9242	1077.92	2	2153.83	48.269	1.22745	5.60942	A0A0H3BZ03	R3H domain protein OS=Streptococcus pyogenes serotype M49 (strain NZ131) OX=471876 GN=Spy49_0209 PE=4 SV=1	VLESGQDYTMDPMSNSER					0						VLESGQDYTMDPMSNSER	[10] Oxidation (M)|[16] Phospho (STY)	7.4999	-0.0922158	3	TMDPMSNSERKIVHK	S	270								41.3609	0	131.166	74.3541	33.7136	9.67578	4.05646	197.327	65.0374	2257.15	4123.81	2537.23	58.2637	134.17	50.2621
9401	859.36	2	1716.71	36.1634	0.62765	4.36288	A0A0H3BYI6	L-proline Glycine Betaine ABC transport ATP-binding protein proV OS=Streptococcus pyogenes serotype M49 (strain NZ131) OX=471876 GN=opuAA PE=3 SV=1	DQYPNQLSGGMQQR	DQYPNQLSGGMQQR	[3] Phospho (STY)|[11] Oxidation (M)	32.98	7.77835	2	99.96	99.93	LLDFKDQYPNQLSGG	Y	161					0											97.5556	1073.17	326.628	411.524	450.308	336.709	107.819	469.617	235.93	1989.64	3700.56	2515.63	113.406	185.339	169.156
9786	483.56	3	1447.66	52.2035	0.42265	2.28532	B5XKM2	50S ribosomal protein L19 OS=Streptococcus pyogenes serotype M49 (strain NZ131) OX=471876 GN=rplS PE=3 SV=1	KGQGISEMYTVR	KGQGISEMYTVR	[6] Phospho (STY)	74.84	4.19633	3	100	99.2133	SRKGQGISEMYTVRK	S	56	KGQGISEMYTVR	[6] Phospho (STY)	6.3267	4.18007	3	SRKGQGISEMYTVRK	S	56								141.547	204.909	155.536	429.792	282.536	326.508	105.64	89.7835	58.7679	34.6066	133.519	107.22	135.155	282.731	183.916
9846	824.823	2	1647.63	40.5622	0.504567	4.22438	B5XJ63	50S ribosomal protein L17 OS=Streptococcus pyogenes serotype M49 (strain NZ131) OX=471876 GN=rplQ PE=3 SV=1	NEIASENYDEAADK					0						NEIASENYDEAADK	[5] Phospho (STY)	6.6134	0.881115	2	YVRNEIASENYDEAA	S	72								0	82.3908	49.9962	3.05994	7.07458	9.37253	3.33334	28.1908	11.6412	88.2293	198.291	149.006	18.6596	15.4816	18.867
9849	1009.5	2	2016.98	66.1079	0.286683	5.81717	B5XIW7	60 kDa chaperonin OS=Streptococcus pyogenes serotype M49 (strain NZ131) OX=471876 GN=groL PE=3 SV=1	IALIKSQLETTTSDFDR	IALIKSQLETTTSDFDR	[6] Phospho (STY)	70.68	-0.519476	4	99.56	96.825	NRIALIKSQLETTTS	S	349	IALIKSQLETTTSDFDR	[6] Phospho (STY)	7.9462	-0.481564	14	NRIALIKSQLETTTS	S	349								0	78.1436	27.0594	48.6048	60.6971	8.52774	0	88.3921	37.3578	298.324	630.849	441.287	51.773	88.492	69.6549
9931	730.33	1	729.323	46.2908	0.525267	5.81717	B5XJ48	50S ribosomal protein L5 OS=Streptococcus pyogenes serotype M49 (strain NZ131) OX=471876 GN=rplE PE=3 SV=1	SIAGFR	SIAGFR	[1] Phospho (STY)	34.13	2.67446	2	100	100	LITKAKKSIAGFRLR	S	74					0											0	34.2452	18.9208	3.40323	0	0	0	18.1922	7.55811	3.92647	74.2061	63.7979	0	0	15.337
9949	509.916	3	1526.73	38.6871	0.50465	2.35457	A0A0H3BZ61	F420_ligase domain-containing protein OS=Streptococcus pyogenes serotype M49 (strain NZ131) OX=471876 GN=Spy49_0453 PE=4 SV=1	KTEVIDSQGETIK					0						KTEVIDSQGETIK	[7] Phospho (STY)	6.688	3.03694	2	RKTEVIDSQGETIKF	S	189								133.039	661.5	302.42	78.4427	91.2755	127.413	180.262	429.778	295.671	22.2054	78.0992	87.6647	121.749	224.102	299.847
9997	795.832	2	1589.65	35.1538	0.381917	4.08587	A0A0H3BZR7	Mid-cell-anchored protein Z OS=Streptococcus pyogenes serotype M49 (strain NZ131) OX=471876 GN=mapZ PE=3 SV=1	DQFLSEDSHHPAK	DQFLSEDSHHPAK	[8] Phospho (STY)	35.98	-0.570765	2	98.37	94.345	DQFLSEDSHHPAKQN	S	167	DQFLSEDSHHPAK	[8] Phospho (STY)	7.4817	-0.585569	7	DQFLSEDSHHPAKQN	S	167								92.8977	426.329	347.76	179.591	182.352	110.696	71.7375	385.676	345.907	247.539	799.788	514.15	146.983	233.787	268.461
10119	674.956	3	2021.85	68.0857	0.558683	3.39335	A0A0H3BXS5	Protein-export membrane protein SecG OS=Streptococcus pyogenes serotype M49 (strain NZ131) OX=471876 GN=Spy49_0421 PE=3 SV=1	NPSSNVFDSSGSEALFER					0						NPSSNVFDSSGSEALFER	[9] Phospho (STY)	7.0248	4.43658	4	PSSNVFDSSGSEALF	S	35								303.2	658.416	618.759	714.377	502.515	1368.86	198.421	371.006	541.57	228.885	464.399	1026.67	367.129	738.81	812.881
10122	862.392	2	1722.77	54.1195	0.463617	4.43213	A0A0H3BZJ8	Cell division protein FtsA OS=Streptococcus pyogenes serotype M49 (strain NZ131) OX=471876 GN=ftsA PE=3 SV=1	VDVVGSEEPVEVTER					0						VDVVGSEEPVEVTER	[6] Phospho (STY)	6.7039	-1.45445	4	VKVDVVGSEEPVEVT	S	280								9.39215	145.276	94.4517	12.1912	23.0629	0	9.87346	95.4172	71.9201	521.702	982.921	959.07	48.3916	114.87	86.3559
10142	791.37	2	1580.73	53.8197	0.348117	4.29363	A0A0H3BY45	Ribosome hibernation promoting factor OS=Streptococcus pyogenes serotype M49 (strain NZ131) OX=471876 GN=hpf PE=3 SV=1	NVTLKPMDVEEAR					0						NVTLKPMDVEEAR	[3] Phospho (STY)	6.3324	-0.442558	2	VVRTKNVTLKPMDVE	T	134								9.63278	17.3621	58.8853	28.0853	6.52811	6.22067	14.0797	89.1259	74.4793	255.62	672.639	403.25	138.538	243.15	243.999
10202	592.608	3	1774.8	64.0687	0.7226	3.04709	B5XI40	30S ribosomal protein S6 OS=Streptococcus pyogenes serotype M49 (strain NZ131) OX=471876 GN=rpsF PE=3 SV=1	FDSILTDNGATVVESK	FDSILTDNGATVVESK	[3] Phospho (STY)	66.73	-0.505771	8	99.97	99.3187	ALVARFDSILTDNGA	S	28	FDSILTDNGATVVESK	[3] Phospho (STY)	7.9652	-0.51903	17	ALVARFDSILTDNGA	S	28								13.6562	57.1265	83.4372	379.557	315.783	840.438	2.29926	61.1432	144.258	204.082	419.779	1295.34	15.264	287.044	412.737
10399	1154.51	2	2307.01	48.7328	0.7636	6.37119	A0A0H3BZ23	Cell division protein FtsZ OS=Streptococcus pyogenes serotype M49 (strain NZ131) OX=471876 GN=ftsZ PE=3 SV=1	TFTQTNAQQVAGAQYASDQAK	TFTQTNAQQVAGAQYASDQAK	[5] Phospho (STY)	41.27	-2.77397	13	36.97	34.1092	QPRTFTQTNAQQVAG	T	336	TFTQTNAQQVAGAQYASDQAK	[5] Phospho (STY)	7.8644	-2.74082	9	QPRTFTQTNAQQVAG	T	336								746.18	1939.79	1442.69	136.015	105.579	30.0437	280.112	748.256	561.26	89.6484	292.3	152.6	893.782	1042.84	1005.83
10445	917.435	2	1832.86	45.9501	0.361367	4.9169	A0A0H3BY55	Non-specific serine/threonine protein kinase OS=Streptococcus pyogenes serotype M49 (strain NZ131) OX=471876 GN=Spy49_1257c PE=4 SV=1	YIQNHAPLSNNEVVR	YIQNHAPLSNNEVVR	[9] Phospho (STY)	50.58	-0.956836	7	100	99.97	IQNHAPLSNNEVVRI	S	109	YIQNHAPLSNNEVVR	[9] Phospho (STY)	6.2447	-0.969675	9	IQNHAPLSNNEVVRI	S	109								30.9861	162.865	90.5231	85.1515	68.8731	23.5063	9.94705	84.8586	31.7036	898.741	1925.21	1396.86	18.9525	58.0388	69.3679
10498	1053.44	2	2104.86	51.6171	0.504567	5.40166	A0A0H3BZ03	R3H domain protein OS=Streptococcus pyogenes serotype M49 (strain NZ131) OX=471876 GN=Spy49_0209 PE=4 SV=1	TVSSIEGVDSYSEGNDPNR					0						TVSSIEGVDSYSEGNDPNR	[1] Phospho (STY)	7.1807	0.302228	4	ERKIVHKTVSSIEGV	T	278								7.67609	84.7135	20.0805	16.722	4.82153	0	0	21.1958	0	764.41	1558.22	1077.23	37.3146	92.896	38.8006
10561	868.872	2	1735.73	42.2734	0.484083	4.63989	B5XIW7	60 kDa chaperonin OS=Streptococcus pyogenes serotype M49 (strain NZ131) OX=471876 GN=groL PE=3 SV=1	SQLETTTSDFDREK					0						SQLETTTSDFDREK	[1] Phospho (STY)	6.9906	-0.553628	3	NRIALIKSQLETTTS	S	349								37.074	249.689	116.1	99.9843	94.3134	27.2663	41.3093	290.142	175.966	453.789	970.415	697.177	64.8815	122.535	69.4657
10632	494.25	2	986.486	55.1082	0.566	2.49307	B5XIW7	60 kDa chaperonin OS=Streptococcus pyogenes serotype M49 (strain NZ131) OX=471876 GN=groL PE=3 SV=1	GTFSVVAVK	GTFSVVAVK	[2] Phospho (STY)	27.63	1.81229	2	99.06	94.86	VLNKIRGTFSVVAVK	T	268					0											19.2632	65.8213	94.1243	57.0491	87.9159	54.6699	28.5273	104.09	81.0892	353.68	499.337	522.964	36.7125	105	67.6272
10646	818.113	4	3268.42	68.7133	0.307367	4.08587	A0A0H3BZ18	Cell-division initiation protein OS=Streptococcus pyogenes serotype M49 (strain NZ131) OX=471876 GN=divIVA PE=4 SV=1	ELEAYQLDSQSDSTTEPEVNLSETQTFK	ELEAYQLDSQSDSTTEPEVNLSETQTFK	[24] Phospho (STY)	104.05	1.63252	3	97.14	72.16	PEVNLSETQTFKLNI	T	245	ELEAYQLDSQSDSTTEPEVNLSETQTFK	[24] Phospho (STY)	7.77	1.62532	3	PEVNLSETQTFKLNI	T	245								22.0897	6.24014	36.4486	83.9827	0	624.537	16.2738	109.009	206.009	3.92044	41.8168	302.757	0	909.106	8236.44
10774	770.845	2	1539.68	65.0167	0.422783	4.08587	A0A0H3BZ23	Cell division protein FtsZ OS=Streptococcus pyogenes serotype M49 (strain NZ131) OX=471876 GN=ftsZ PE=3 SV=1	GNALMGIGIGSGEER					0						GNALMGIGIGSGEER	[11] Phospho (STY)	7.0035	0.654744	2	LMGIGIGSGEERIVE	S	233								29.2577	0	65.8542	56.925	25.4616	34.5761	0	18.5924	11.3171	151.068	514.523	531.66	42.853	102.269	56.3869
10805	1241.64	2	2481.26	82.1562	0.422833	7.13296	A0A0H3C1H3	Fructose-bisphosphate aldolase class II OS=Streptococcus pyogenes serotype M49 (strain NZ131) OX=471876 GN=fba PE=4 SV=1	LTAAVPGFPIVLHGGSGIPDDQIK	LTAAVPGFPIVLHGGSGIPDDQIK	[16] Phospho (STY)	50.49	-2.92289	3	100	99.97	PIVLHGGSGIPDDQI	S	211	LTAAVPGFPIVLHGGSGIPDDQIK	[16] Phospho (STY)	8.0421	-2.89208	5	PIVLHGGSGIPDDQI	S	211								0	0	0	0	0	0	0	0	0	0	0	0	0	0	0
10982	1242.08	2	2482.15	49.9674	0.34075	6.7867	A0A0H3BZD6	Putative PTS system enzyme II OS=Streptococcus pyogenes serotype M49 (strain NZ131) OX=471876 GN=Spy49_1737c PE=4 SV=1	TEDEAKLPETPVSDAPVATAPHK	TEDEAKLPETPVSDAPVATAPHK	[13] Phospho (STY)	124.73	-3.44459	27	99.99	97.4273	KLPETPVSDAPVATA	S	507					0											5.08729	128.9	67.3498	7.58286	34.1041	0	0	99.4048	65.6608	728.445	1838.39	1605.3	39.0325	80.2813	101.836
11172	355.839	3	1064.49	32.1048	0.3818	1.80055	A0A0H3BZ85	Putative endopeptidase Clp ATP-binding chain C OS=Streptococcus pyogenes serotype M49 (strain NZ131) OX=471876 GN=clpC PE=3 SV=1	ELTSGHTLK	ELTSGHTLK	[4] Phospho (STY)	35.88	4.11747	7	92.13	72.6686	ILSRELTSGHTLKIG	S	796					0											1.63766	19.7936	18.5397	6.87102	1.07844	21.8465	3.39485	13.0022	34.398	233.733	364.134	795.559	0	31.3376	38.4566
11547	977.457	2	1952.9	54.9108	0.361217	5.47091	A0A0H3C2S7	Uncharacterized protein OS=Streptococcus pyogenes serotype M49 (strain NZ131) OX=471876 GN=Spy49_1801c PE=4 SV=1	LLSHQSMGYGQPLEVSK	LLSHQSMGYGQPLEVSK	[6] Phospho (STY)	38.02	-3.53508	3	55.3	51.69	EKLLSHQSMGYGQPL	S	110	LLSHQSMGYGQPLEVSK	[3] Phospho (STY)	7.2974	-3.54713	4	RLQEKLLSHQSMGYG	S	107								366.93	8.09924	533.706	800.904	142.348	14.1906	77.1819	167.613	89.27	21.2584	3.74251	0	1136.9	1012.31	1334.98
11555	473.245	2	944.475	63.9868	0.443133	2.70083	B5XJ35	30S ribosomal protein S10 OS=Streptococcus pyogenes serotype M49 (strain NZ131) OX=471876 GN=rpsJ PE=3 SV=1	SLYTIIR	SLYTIIR	[1] Phospho (STY)	33.69	1.76837	3	99.92	99.4967	VPLPTERSLYTIIRA	S	47					0											0	10.8947	0	28.7545	19.9214	37.162	0	0	0.112866	2.29852	12.3254	17.9266	0.00106867	0	0.366461
11651	961.919	2	1921.82	46.032	0.525183	4.98615	B5XKM7	Enolase OS=Streptococcus pyogenes serotype M49 (strain NZ131) OX=471876 GN=eno PE=3 SV=1	GMVPSGASTGEHEAVELR					0						GMVPSGASTGEHEAVELR	[2] Oxidation (M)|[5] Phospho (STY)	7.4626	-0.327376	2	FGRGMVPSGASTGEH	S	39								0	58.1742	0	0	0	0	0	0	0	10.0258	91.9921	38.4517	0	0	0
11728	982.93	2	1963.85	74.4215	0.545617	5.33241	B5XJ39	50S ribosomal protein L2 OS=Streptococcus pyogenes serotype M49 (strain NZ131) OX=471876 GN=rplB PE=3 SV=1	NMTSLDFAEITTSTPEK	NMTSLDFAEITTSTPEK	[4] Phospho (STY)	31.44	-1.61388	3	49.94	49.8833	NGRRNMTSLDFAEIT	S	18	NMTSLDFAEITTSTPEK	[3] Phospho (STY)	7.8348	-1.57494	2	TNGRRNMTSLDFAEI	T	17								0	0	4.50079	0	0	0	0	0	3.89993	51.2509	243.357	210.14	0	10.0264	0
11857	889.081	3	2664.22	66.7558	0.463783	3.87812	A0A0H3BYB9	Tagatose-6-phosphate kinase OS=Streptococcus pyogenes serotype M49 (strain NZ131) OX=471876 GN=fruK PE=3 SV=1	SQEETELNGQGPIISQEQLEDLK	SQEETELNGQGPIISQEQLEDLK	[5] Phospho (STY)	96.77	1.5699	7	96.58	87.6833	KIKSQEETELNGQGP	T	99					0											233.642	733.255	560.114	55.5191	16.8479	42.8475	97.1637	188.579	145.314	289.596	648.252	821.091	133.088	231.478	210.914
11916	818.865	2	1635.71	46.6523	0.38195	4.29363	A0A0H3BWJ5	Transcription termination/antitermination protein NusG OS=Streptococcus pyogenes serotype M49 (strain NZ131) OX=471876 GN=nusG PE=3 SV=1	NTPNVTGFVGSHGNR	NTPNVTGFVGSHGNR	[11] Phospho (STY)	44.96	-0.416349	2	99.83	99.43	NVTGFVGSHGNRSKP	S	100	NTPNVTGFVGSHGNR	[11] Phospho (STY)	6.9241	-0.369601	5	NVTGFVGSHGNRSKP	S	100								4.98615	62.81	31.0012	29.3632	29.2385	13.8985	0	5.45489	5.80365	859.358	1712.71	1140.61	6.49426	27.1514	9.19531
12012	791.848	2	1581.68	46.2703	0.484317	4.15512	A0A0H3BXD5	30S ribosomal protein S12 OS=Streptococcus pyogenes serotype M49 (strain NZ131) OX=471876 GN=rpsL PE=3 SV=1	SDSPALNIGYNSHK	SDSPALNIGYNSHK	[3] Phospho (STY)	52.84	-0.0660402	2	93.95	71.975	SKIEKSDSPALNIGY	S	39					0											15.8273	157.951	78.7523	9.98792	10.1213	21.2417	26.8209	158.087	57.0999	85.7796	127.989	121.852	36.602	62.6699	38.2679
12229	935.445	2	1868.88	31.157	0.3614	5.0554	B5XJ47	50S ribosomal protein L24 OS=Streptococcus pyogenes serotype M49 (strain NZ131) OX=471876 GN=rplX PE=3 SV=1	HQKPNTENPQGAIVEK	HQKPNTENPQGAIVEK	[6] Phospho (STY)	76.78	-1.33263	3	100	100	KKHQKPNTENPQGAI	T	49	HQKPNTENPQGAIVEK	[6] Phospho (STY)	8.1161	-1.29172	7	KKHQKPNTENPQGAI	T	49								0	14.5909	0	0	4.70325	0	0	0	0	0	38.0937	29.9907	5.82599	0	4.89752
12278	880.614	4	3518.43	58.1161	0.948167	4.15512	A0A0H3C1V2	Single-stranded DNA-binding protein OS=Streptococcus pyogenes serotype M49 (strain NZ131) OX=471876 GN=ssb2 PE=3 SV=1	EGGSTGSFNGGFNNNTSSSNSYSAPAQQTPNFGR					0						EGGSTGSFNGGFNNNTSSSNSYSAPAQQTPNFGR	[4] Phospho (STY)	7.6556	-3.33601	4	RATREGGSTGSFNGG	S	113								80.2959	249.044	368.406	31.9384	39.4021	297.503	25.179	107.49	517.382	297.06	449.359	2055.64	122.384	645.498	1518.81
12362	1053.43	2	2104.86	49.3809	0.443133	5.54017	A0A0H3BZ03	R3H domain protein OS=Streptococcus pyogenes serotype M49 (strain NZ131) OX=471876 GN=Spy49_0209 PE=4 SV=1	TVSSIEGVDSYSEGNDPNR					0						TVSSIEGVDSYSEGNDPNR	[1] Phospho (STY)	6.745	-1.59261	4	ERKIVHKTVSSIEGV	T	278								17.4842	153.239	88.304	4.56853	3.92414	5.79858	3.77368	71.2584	20.3965	926.14	1567.18	1189.57	44.3211	67.2627	34.1111
12461	930.482	2	1858.95	66.7148	0.640533	5.12465	A0A0H3BZC7	EIIAB-Man OS=Streptococcus pyogenes serotype M49 (strain NZ131) OX=471876 GN=manL PE=4 SV=1	VVNALQGAIPAGTVIGDGK					0						VVNALQGAIPAGTVIGDGK	[13] Phospho (STY)	7.489	-2.7989	3	QGAIPAGTVIGDGKL	T	161								116.874	316.241	230.167	898.855	863.239	960.106	53.4651	129.009	77.9511	23.3198	69.7413	69.7527	67.6226	124.302	61.6781
12504	1017.47	2	2032.93	59.5276	0.320267	6.02493	A0A0H3BYP4	Phosphoglucosamine mutase OS=Streptococcus pyogenes serotype M49 (strain NZ131) OX=471876 GN=glmM PE=3 SV=1	ASAGVMISASHNPALDNGIK	ASAGVMISASHNPALDNGIK	[10] Phospho (STY)|[17] Deamidation (N)	33.71	-1.30713	7	56.8	38.3114	AGVMISASHNPALDN	S	100					0											128.234	43.8787	19.8047	0	0	0	26.0995	246.451	64.9232	386.712	887.64	557.134	310.093	286.588	416.626
12663	1025.47	2	2048.92	54.7674	0.30715	5.60942	A0A0H3BYP4	Phosphoglucosamine mutase OS=Streptococcus pyogenes serotype M49 (strain NZ131) OX=471876 GN=glmM PE=3 SV=1	ASAGVMISASHNPALDNGIK	ASAGVMISASHNPALDNGIK	[6] Oxidation (M)|[10] Phospho (STY)|[17] Deamidation (N)	85.13	-2.53675	2	92.98	71.235	AGVMISASHNPALDN	S	100					0											12.0333	443.713	66.5698	0	0	0	88.5032	233.255	136.874	544.389	923.906	571.012	96.3579	132.335	174.135
12707	1395.6	1	1394.59	49.4014	0.42265	11.6343	A0A0H3BZP2	Arsenate reductase OS=Streptococcus pyogenes serotype M49 (strain NZ131) OX=471876 GN=arsC PE=3 SV=1	EDGESVNPIEVK	EDGESVNPIEVK	[5] Phospho (STY)	81.11	-4.07884	4	100	100	YMKEDGESVNPIEVK	S	131					0											0	0	0	0	0	0	0	0	0	0	0	0	0	0	7.50421
12988	428.216	2	854.417	49.2376	0.566	2.21607	A0A0H3BYE2	Putative glutamyl-aminopeptidase OS=Streptococcus pyogenes serotype M49 (strain NZ131) OX=471876 GN=pepA PE=3 SV=1	STVDLIK	STVDLIK	[2] Phospho (STY)	40.95	2.54543	3	50	50	IKKLDRSTVDLIKRY	T	348					0											19.5506	76.1287	26.3392	76.8682	85.8578	114.489	18.1131	43.4952	41.9911	281.844	497.586	488.381	24.7174	60.1302	56.5528
13148	978.452	2	1954.89	52.1421	0.279317	5.40166	A0A0H3BZL9	PTS system_ fructose-specific IIABC component OS=Streptococcus pyogenes serotype M49 (strain NZ131) OX=471876 GN=fruA PE=4 SV=1	SETAVSTEKTSLGGAFYK					0						SETAVSTEKTSLGGAFYK	[10] Phospho (STY)	5.5463	-1.2115	4	TAVSTEKTSLGGAFY	T	283								160.877	458.678	300.059	63.4544	43.6098	11.1151	52.1052	230.683	113.234	195.878	464.21	328.597	117.781	178.953	154.948
13368	722.654	3	2164.94	60.4958	0.627433	3.73961	A0A0H3C0G3	Uncharacterized protein OS=Streptococcus pyogenes serotype M49 (strain NZ131) OX=471876 GN=Spy49_1599c PE=4 SV=1	DIADSTVIVSYTSDQGSAEK					0						DIADSTVIVSYTSDQGSAEK	[5] Phospho (STY)	6.7998	0.155233	7	VEKDIADSTVIVSYT	S	234								53.03	180.534	166.333	33.9722	24.3597	49.96	154.36	409.341	363.227	991.176	1586.7	3082.58	66.0381	265.925	354.134
13468	683.321	3	2046.94	94.2407	0.545717	3.39335	A0A0H3BZS7	DAK2 domain protein OS=Streptococcus pyogenes serotype M49 (strain NZ131) OX=471876 GN=Spy49_1556c PE=4 SV=1	SNITTSLFQEMVQAAATR	SNITTSLFQEMVQAAATR	[6] Phospho (STY)	47.78	-1.84175	2	29.25	28.52	-MSNITTSLFQEMVQ	S	7					0											0	0	0	0	0	0	0	0	0	0	0	11.3113	2.59973	15.2634	226.71
13629	953.471	1	952.464	40.6982	0.340883	8.79501	B5XJ55	50S ribosomal protein L15 OS=Streptococcus pyogenes serotype M49 (strain NZ131) OX=471876 GN=rplO PE=3 SV=1	SAEAAIIAK	SAEAAIIAK	[1] Phospho (STY)	87.27	0.820024	4	100	100	KAAKFSKSAEAAIIA	S	131					0											0	0	0	1.89883	14.2952	3.97849	0	0	0	7.28302	85.3341	19.4817	0	0	0
13943	912.892	2	1823.77	60.762	0.443133	4.98615	A0A0H3C052	NADH oxidase OS=Streptococcus pyogenes serotype M49 (strain NZ131) OX=471876 GN=nox1 PE=4 SV=1	VYMESPVQSIDYDAK					0						VYMESPVQSIDYDAK	[9] Phospho (STY)	6.4694	0.60778	2	YMESPVQSIDYDAKT	S	83								19.5665	11.1165	30.2757	156.384	75.0463	85.1923	15.3178	31.4141	36.9107	820.935	1505.5	1274.26	26.9142	67.306	25.135
14106	866.369	2	1730.72	22.1136	0.266317	4.50139	A0A0H3BXH0	Endolytic murein transglycosylase OS=Streptococcus pyogenes serotype M49 (strain NZ131) OX=471876 GN=mltG PE=3 SV=1	TDFKDKDQQDQQR	TDFKDKDQQDQQR	[1] Phospho (STY)	47.29	-1.86368	5	100	100	------MTDFKDKDQ	T	2					0											0	168.282	128.024	69.8092	66.5772	68.7827	29.4271	145.023	129.428	75.319	171.795	163.859	142.935	91.7291	121.581
14258	1055.49	2	2108.97	47.7847	0.389283	5.74792	B5XKP7	ATP synthase subunit b OS=Streptococcus pyogenes serotype M49 (strain NZ131) OX=471876 GN=atpF PE=3 SV=1	DIDQAEQSRLSAQQLEAK					0						DIDQAEQSRLSAQQLEAK	[11] Phospho (STY)	6.529	-1.20565	4	QAEQSRLSAQQLEAK	S	58								16.2375	131.685	73.7325	10.2666	6.34176	0	0	39.3527	29.7139	408.104	1038.52	726.266	26.2239	49.4522	47.3176
14324	1255.53	1	1254.52	28.0057	0.463667	9.90305	A0A0H3BZL9	PTS system_ fructose-specific IIABC component OS=Streptococcus pyogenes serotype M49 (strain NZ131) OX=471876 GN=fruA PE=4 SV=1	VETNGASGVANR	VETNGASGVANR	[4] Deamidation (N)|[7] Phospho (STY)	69.87	-1.67906	13	100	93.4567	KVETNGASGVANRLT	S	205	VETNGASGVANR	[4] Deamidation (N)|[7] Phospho (STY)	7.3733	-1.69782	10	KVETNGASGVANRLT	S	205								0	22.653	19.9335	0	0	0	0	4.66979	6.96014	245.995	847.867	992.808	4.54712	19.0677	57.9725
14469	1025.47	2	2048.92	55.1491	0.42265	5.74792	A0A0H3BYP4	Phosphoglucosamine mutase OS=Streptococcus pyogenes serotype M49 (strain NZ131) OX=471876 GN=glmM PE=3 SV=1	ASAGVMISASHNPALDNGIK	ASAGVMISASHNPALDNGIK	[6] Oxidation (M)|[10] Phospho (STY)|[17] Deamidation (N)	70.47	-1.6264	9	91.64	60.8222	AGVMISASHNPALDN	S	100					0											46.7222	516.105	165.168	0	0	0	130.95	588.835	179.924	521.059	1177.79	736.845	154.533	193.661	94.6959
14555	1152.51	2	2303.01	62.5345	0.422667	6.6482	A0A0H3BYW2	EIICB-Lac OS=Streptococcus pyogenes serotype M49 (strain NZ131) OX=471876 GN=lacE PE=4 SV=1	VYDEQILAEEAAGTNSSDALK					0						VYDEQILAEEAAGTNSSDALK	[14] Phospho (STY)	6.2095	-2.54106	5	LAEEAAGTNSSDALK	T	425								314.617	1011.6	744.778	0	0	0	159.125	398.868	238.092	398.049	660.895	500.083	390.323	432.92	262.346
14764	702.627	3	2104.86	51.6171	0.42265	2.83934	A0A0H3BZ03	R3H domain protein OS=Streptococcus pyogenes serotype M49 (strain NZ131) OX=471876 GN=Spy49_0209 PE=4 SV=1	TVSSIEGVDSYSEGNDPNR					0						TVSSIEGVDSYSEGNDPNR	[1] Phospho (STY)	7.1807	0.682052	4	ERKIVHKTVSSIEGV	T	278								1.94887	16.6676	23.0186	0	2.06973	19.5136	0	19.0071	8.25333	346.426	422.459	957.288	13.7879	61.18	88.4317
14772	876.424	2	1750.83	50.1443	0.320267	4.9169	A0A0H3BZC7	EIIAB-Man OS=Streptococcus pyogenes serotype M49 (strain NZ131) OX=471876 GN=manL PE=4 SV=1	IIVASDEVAQDDLRK					0						IIVASDEVAQDDLRK	[5] Phospho (STY)	7.3838	-9.44118	2	ADRIIVASDEVAQDD	S	201								120.724	400.528	233.461	14.595	40.042	21.4481	69.2637	256.767	109.642	56.4009	144.114	72.5523	160.24	189.512	148.627
15041	885.355	2	1768.69	26.0487	0.463717	4.57064	B5XJ39	50S ribosomal protein L2 OS=Streptococcus pyogenes serotype M49 (strain NZ131) OX=471876 GN=rplB PE=3 SV=1	GSVMNPNDHPHGGGEGK	GSVMNPNDHPHGGGEGK	[2] Phospho (STY)	42.01	-2.44224	2	100	100	IRPTVRGSVMNPNDH	S	223	GSVMNPNDHPHGGGEGK	[2] Phospho (STY)	7.6804	-2.39901	3	IRPTVRGSVMNPNDH	S	223								0	0	0	0	0	0	0	0	0	0	0	0	0	0	0
15700	1083.48	2	2164.94	60.5777	0.586483	5.81717	A0A0H3C0G3	Uncharacterized protein OS=Streptococcus pyogenes serotype M49 (strain NZ131) OX=471876 GN=Spy49_1599c PE=4 SV=1	DIADSTVIVSYTSDQGSAEK					0						DIADSTVIVSYTSDQGSAEK	[5] Phospho (STY)	6.7998	-0.590344	7	VEKDIADSTVIVSYT	S	234								0	66.0516	75.8997	2.79865	0	0	14.2584	91.8649	33.1584	1325.6	2426.26	1791.81	19.9797	78.6385	37.0166
16181	855.894	2	1709.77	41.7893	0.258833	4.77839	A0A0H3BXD5	30S ribosomal protein S12 OS=Streptococcus pyogenes serotype M49 (strain NZ131) OX=471876 GN=rpsL PE=3 SV=1	SDSPALNIGYNSHKK	SDSPALNIGYNSHKK	[12] Phospho (STY)	61.06	-2.27551	2	100	99.885	ALNIGYNSHKKVQTK	S	48					0											0	5.03397	2.44456	0	0	0	0	0	0	0	5.70135	0	0	0	0
16286	674.953	3	2021.84	70.2275	0.443283	3.3241	A0A0H3BXS5	Protein-export membrane protein SecG OS=Streptococcus pyogenes serotype M49 (strain NZ131) OX=471876 GN=Spy49_0421 PE=3 SV=1	NPSSNVFDSSGSEALFER					0						NPSSNVFDSSGSEALFER	[9] Phospho (STY)	6.6949	0.570752	2	PSSNVFDSSGSEALF	S	35								31.6014	217.411	318.36	62.9128	27.1513	285.765	14.5634	102.746	181.5	42.7617	187.567	592.048	108.336	358.585	500.592
16307	915.409	1	914.401	32.589	0.402333	7.40997	B5XMC1	Ornithine carbamoyltransferase OS=Streptococcus pyogenes serotype M49 (strain NZ131) OX=471876 GN=arcB PE=3 SV=1	TQVFQGR	TQVFQGR	[1] Phospho (STY)	35.28	0.257101	4	100	100	------MTQVFQGRS	T	2					0											0	0	4.74866	0	0	0	0	0	3.99503	125.015	601.927	470.151	0	0	15.4217
16368	1007.41	2	2012.8	50.8332	0.402183	5.40166	B5XJR1	Elongation factor G OS=Streptococcus pyogenes serotype M49 (strain NZ131) OX=471876 GN=fusA PE=3 SV=1	LYDGSYHDVDSSETAFK					0						LYDGSYHDVDSSETAFK	[11] Phospho (STY)	7.2544	-0.84747	2	GSYHDVDSSETAFKI	S	575								0	0	0	0	0	0	0	0	0	45.6833	93.3479	45.6417	0	0	0
16395	490.569	3	1468.69	46.1679	0.586717	2.28532	B5XJR1	Elongation factor G OS=Streptococcus pyogenes serotype M49 (strain NZ131) OX=471876 GN=fusA PE=3 SV=1	VEANVGAPQVSYR	VEANVGAPQVSYR	[11] Phospho (STY)	78.12	10.4843	3	100	99.9933	NVGAPQVSYRETFRA	S	480	VEANVGAPQVSYR	[11] Phospho (STY)	7.9701	10.4682	5	NVGAPQVSYRETFRA	S	480								73.4818	134.208	123.782	152.077	142.669	192.515	41.1121	87.2364	84.7524	34.5872	90.8221	176.846	62.4202	113.571	168.833
16427	967.936	2	1933.86	71.4548	0.402417	5.19391	B5XHX4	Serine--tRNA ligase OS=Streptococcus pyogenes serotype M49 (strain NZ131) OX=471876 GN=serS PE=3 SV=1	TYDVEVWIPAQNTYR					0						TYDVEVWIPAQNTYR	[1] Phospho (STY)	6.3795	-1.86656	5	MGFSAAKTYDVEVWI	T	333								3.27164	7.2525	3.42335	21.1371	9.76324	3.43737	37.5777	17.3016	1.9954	495.187	939.152	750.314	42.4407	119.955	67.8335
16523	951.422	1	950.415	46.9187	0.225517	8.51801	A0A0H3BYM9	Glyceraldehyde-3-phosphate dehydrogenase OS=Streptococcus pyogenes serotype M49 (strain NZ131) OX=471876 GN=plr PE=3 SV=1	TLEYFAK	TLEYFAK	[4] Phospho (STY)	26.19	0.0287843	2	99.81	99.79	QLVRTLEYFAKIAK-	Y	330					0											0	0	0	0	0	0	0	0	0	25.5093	233.044	200.301	0	0	0
17677	529.933	3	1586.78	59.3711	0.422667	2.70083	B5XI32	Elongation factor P OS=Streptococcus pyogenes serotype M49 (strain NZ131) OX=471876 GN=efp PE=3 SV=1	LIINTAEGTYVSRA	LIINTAEGTYVSRA	[12] Phospho (STY)	56.21	3.43726	4	99.07	93.335	TAEGTYVSRA-----	S	183	LIINTAEGTYVSRA	[12] Phospho (STY)	6.892	3.42243	3	TAEGTYVSRA-----	S	183								0	39.052	0	456.945	476.079	451.477	0	9.96613	10.5898	88.7284	240.562	562.808	5.2482	88.2928	93.6962
17725	645.627	3	1933.86	71.4753	0.402417	3.4626	B5XHX4	Serine--tRNA ligase OS=Streptococcus pyogenes serotype M49 (strain NZ131) OX=471876 GN=serS PE=3 SV=1	TYDVEVWIPAQNTYR					0						TYDVEVWIPAQNTYR	[1] Phospho (STY)	6.3795	-0.588706	5	MGFSAAKTYDVEVWI	T	333								0	0	0	0	0	4.52158	0	0	4.10239	336.824	597.509	1206.88	26.7079	103.366	131.659
17821	935.935	2	1869.86	58.3825	0.3205	5.12465	A0A0H3BZL3	Conserved hypothetical integral membrane protein OS=Streptococcus pyogenes serotype M49 (strain NZ131) OX=471876 GN=Spy49_1194c PE=4 SV=1	ELFQLQNSGEDLNKR					0						ELFQLQNSGEDLNKR	[8] Phospho (STY)	6.6528	-3.37302	7	ELFQLQNSGEDLNKR	S	186								37.1353	143.07	67.5152	15.7123	10.6037	5.36713	4.41064	50.5845	24.1692	530.774	1130.57	648.529	28.1929	73.9893	18.8252
18234	771.839	2	1541.66	49.1557	0.422667	4.08587	B5XJ48	50S ribosomal protein L5 OS=Streptococcus pyogenes serotype M49 (strain NZ131) OX=471876 GN=rplE PE=3 SV=1	DFHGVPTKSFDGR					0						DFHGVPTKSFDGR	[9] Phospho (STY)	6.7126	-2.36276	3	FHGVPTKSFDGRGNY	S	122								63.3516	309.607	162.737	299.906	343.186	239.816	46.4204	148.132	57.8951	10.3829	64.7222	16.4143	68.5446	157.179	81.5698
18676	901.444	1	900.436	67.9013	0.422733	7.89474	A0A0H3BWE7	Alcohol dehydrogenase OS=Streptococcus pyogenes serotype M49 (strain NZ131) OX=471876 GN=adhP PE=3 SV=1	KVLDFIS	KVLDFIS	[7] Phospho (STY)	38.66	0.540429	2	100	100	RKVLDFIS-------	S	338					0											0	67.2684	21.8261	0	0	0	1.88498	20.0988	7.52056	249.755	781.79	641.157	4.47592	5.41016	3.52246
18771	820.406	2	1638.8	28.5925	0.225417	4.29363	A0A0H3C1S0	CsbD domain-containing protein OS=Streptococcus pyogenes serotype M49 (strain NZ131) OX=471876 GN=Spy49_1665c PE=3 SV=1	SKIEQASGGLKEGAGK	SKIEQASGGLKEGAGK	[7] Phospho (STY)	32.96	-0.741727	2	99.84	99.805	KSKIEQASGGLKEGA	S	14					0											4.00649	55.6393	26.1443	16.7931	21.5605	15.222	0	34.241	7.53897	0	14.8172	0	12.4084	7.61694	13.2265
18985	698.832	2	1395.65	39.0279	0.22525	3.80886	B5XKR6	30S ribosomal protein S21 OS=Streptococcus pyogenes serotype M49 (strain NZ131) OX=471876 GN=rpsU PE=3 SV=1	KNESLDDALRR	KNESLDDALRR	[4] Phospho (STY)	45.36	-0.472604	2	100	100	TVVRKNESLDDALRR	S	11					0											0	10.0926	0	23.998	13.5869	15.5606	0	4.56619	4.94879	11.0848	146.448	106.673	7.22311	0	2.46863
19065	702.626	3	2104.86	49.3809	0.463617	2.90859	A0A0H3BZ03	R3H domain protein OS=Streptococcus pyogenes serotype M49 (strain NZ131) OX=471876 GN=Spy49_0209 PE=4 SV=1	TVSSIEGVDSYSEGNDPNR					0						TVSSIEGVDSYSEGNDPNR	[1] Phospho (STY)	6.745	-0.47112	4	ERKIVHKTVSSIEGV	T	278								24.1113	57.4304	43.0409	3.4122	0	7.59635	3.74115	29.8686	30.8199	346.708	428.43	735.255	3.54994	53.2792	33.4749
19277	1242.09	2	2482.17	47.8052	0.266433	6.85596	A0A0H3BZD6	Putative PTS system enzyme II OS=Streptococcus pyogenes serotype M49 (strain NZ131) OX=471876 GN=Spy49_1737c PE=4 SV=1	TEDEAKLPETPVSDAPVATAPHK	TEDEAKLPETPVSDAPVATAPHK	[10] Phospho (STY)	127.7	0.903109	14	99.98	90.3724	DEAKLPETPVSDAPV	T	504					0											0	17.263	0	0	0	0	0	7.11945	8.51169	171.071	640.798	596.278	0	9.37	13.0746
19360	879.385	2	1756.76	41.8098	0.279317	4.70914	A0A0H3BYW2	EIICB-Lac OS=Streptococcus pyogenes serotype M49 (strain NZ131) OX=471876 GN=lacE PE=4 SV=1	EYGAPVTAAAGSYGAHR					0						EYGAPVTAAAGSYGAHR	[2] Phospho (STY)	6.4474	-1.07563	7	LNKAAKEYGAPVTAA	Y	489								27.1584	157.939	129.242	17.3661	5.88377	6.43241	0	77.6011	18.5684	247.354	540.495	442.836	37.4577	86.8815	107.243
19879	907.465	1	906.458	40.821	0.2999	7.89474	A0A0H3BZC7	EIIAB-Man OS=Streptococcus pyogenes serotype M49 (strain NZ131) OX=471876 GN=manL PE=4 SV=1	ANVVPISK	ANVVPISK	[7] Phospho (STY)	40.3	0.14745	10	100	100	KANVVPISKLIEASK	S	230					0											4.27631	20.8218	5.27444	0	0	0	0	0	0	30.3029	124.168	85.2289	0	0	4.33737
20418	941.432	1	940.425	29.1791	0.225433	8.03324	B5XHZ0	Chaperone protein DnaK OS=Streptococcus pyogenes serotype M49 (strain NZ131) OX=471876 GN=dnaK PE=3 SV=1	NTTIPTSK	NTTIPTSK	[3] Phospho (STY)	39.46	-1.95144	2	91.14	84.205	KLIDRNTTIPTSKSQ	T	387					0											0	0	0	0	0	0	0	0	0	0	49.5082	55.5049	0	0	0
20682	893.352	2	1784.69	20.341	0.258833	4.43213	B5XJ39	50S ribosomal protein L2 OS=Streptococcus pyogenes serotype M49 (strain NZ131) OX=471876 GN=rplB PE=3 SV=1	GSVMNPNDHPHGGGEGK	GSVMNPNDHPHGGGEGK	[2] Phospho (STY)|[4] Oxidation (M)	34.24	-2.43151	2	100	100	IRPTVRGSVMNPNDH	S	223					0											0	0	0	0	0	0	0	0	0	0	0	0	0	0	0
20729	1106.43	1	1105.42	28.4694	0.29995	8.65651	B5XLJ2	Serine hydroxymethyltransferase OS=Streptococcus pyogenes serotype M49 (strain NZ131) OX=471876 GN=glyA PE=3 SV=1	YAEGYPGNR	YAEGYPGNR	[1] Phospho (STY)	50.25	0.675919	2	100	99.775	GSVLTNKYAEGYPGN	Y	55					0											0	0	0	0	0	0	0	0	0	0	0	0	0	0	0
20824	890.399	2	1778.78	28.6948	0.279333	4.84765	A0A0H3BXI0	Uncharacterized protein OS=Streptococcus pyogenes serotype M49 (strain NZ131) OX=471876 GN=Spy49_1001c PE=3 SV=1	TKEEHEAASVTVQDR	TKEEHEAASVTVQDR	[9] Phospho (STY)	51	0.225983	6	99.74	97.2183	KEEHEAASVTVQDRV	S	122	TKEEHEAASVTVQDR	[9] Phospho (STY)	7.7998	0.212753	7	KEEHEAASVTVQDRV	S	122								0	52.7815	2.80695	0	0	0	0	19.8628	8.97394	44.3576	181.059	145.673	3.84794	17.1313	3.745
20930	970.438	1	969.431	44.3334	0.348367	8.44875	B5XJ40	30S ribosomal protein S19 OS=Streptococcus pyogenes serotype M49 (strain NZ131) OX=471876 GN=rpsS PE=3 SV=1	LGEFAPTR	LGEFAPTR	[7] Phospho (STY)	43.15	-1.1222	3	100	100	KLGEFAPTRTYKGHA	T	77					0											0	0	0	0	0	0	0	0	0	0	0	0	0	0	0
21179	368.171	3	1101.49	42.8805	0.3483	1.93906	B5XIW7	60 kDa chaperonin OS=Streptococcus pyogenes serotype M49 (strain NZ131) OX=471876 GN=groL PE=3 SV=1	DIKFSADAR	DIKFSADAR	[5] Phospho (STY)	39.46	5.72683	3	100	100	MAKDIKFSADARAAM	S	8					0											0	0	0	27.3377	45.8971	23.0339	0	0	3.01404	2.92746	3.85542	11.9641	0	0	4.50456
21830	996.477	1	995.469	27.706	0.299783	8.44875	A0A0H3BY55	Non-specific serine/threonine protein kinase OS=Streptococcus pyogenes serotype M49 (strain NZ131) OX=471876 GN=Spy49_1257c PE=4 SV=1	VASGPTASVK	VASGPTASVK	[6] Phospho (STY)	55.02	0.524731	9	99.26	91.7444	PKVASGPTASVKLSP	T	302	VASGPTASVK	[6] Phospho (STY)	5.9692	0.601546	4	PKVASGPTASVKLSP	T	302								0	359.121	303.747	0	0	4.55606	0	138.124	155.485	0	28.6141	16.4343	11.1743	50.2766	108.546
21831	818.919	2	1635.82	29.7043	0.217883	4.57064	B5XHV3	Translation initiation factor IF-2 OS=Streptococcus pyogenes serotype M49 (strain NZ131) OX=471876 GN=infB PE=3 SV=1	ASKPDVTASQTVKPK					0						ASKPDVTASQTVKPK	[2] Phospho (STY)	6.119	0.241307	5	ISSFSKASKPDVTAS	S	54								0	20.9072	25.1411	13.0261	0	0	0.853278	11.6371	5.19294	0	29.8072	33.448	8.6092	3.33945	0
21999	1074.49	1	1073.48	50.6694	0.361217	9.21053	B5XLJ8	L-lactate dehydrogenase OS=Streptococcus pyogenes serotype M49 (strain NZ131) OX=471876 GN=ldh PE=3 SV=1	DAAYSIINK	DAAYSIINK	[5] Phospho (STY)	53.82	-0.935443	6	100	99.9771	SVRDAAYSIINKKGA	S	225					0											0	0	0	0	0	0	0	0	0	22.2386	163.973	93.7817	0	0	0
22411	1219.62	1	1218.61	35.6175	0.16405	10.4571	B5XKI1	Elongation factor Tu OS=Streptococcus pyogenes serotype M49 (strain NZ131) OX=471876 GN=tuf PE=3 SV=1	RLPTSVNQPK	RLPTSVNQPK	[5] Phospho (STY)	36.33	-1.54771	4	89.53	71.855	LARRLPTSVNQPKDY	S	43					0											0	0	0	0	0	0	0	0	0	5.90344	137.516	175.451	0	0	0
22663	499.573	3	1495.7	38.1825	0.361517	2.21607	A0A0H3BXH0	Endolytic murein transglycosylase OS=Streptococcus pyogenes serotype M49 (strain NZ131) OX=471876 GN=mltG PE=3 SV=1	VVQANELQETASK	VVQANELQETASK	[12] Phospho (STY)	38.97	3.47233	3	89.74	76.24	NELQETASKESQVPL	S	124	VVQANELQETASK	[12] Phospho (STY)	6.2294	3.4566	2	NELQETASKESQVPL	S	124								73.1413	263.296	178.868	85.6154	107.93	171.811	65.9752	146.449	163.757	17.2867	70.1717	106.657	65.6219	173.944	214.577
22930	907.411	2	1812.81	63.2234	0.266217	4.9169	B5XL08	Phosphopentomutase OS=Streptococcus pyogenes serotype M49 (strain NZ131) OX=471876 GN=deoB PE=3 SV=1	HDYAVSPFQDTVLNK					0						HDYAVSPFQDTVLNK	[6] Phospho (STY)	6.5001	-0.00845313	2	NRHDYAVSPFQDTVL	S	227								0	0	0	0	3.75886	0	0	0	0	171.692	487.412	242.15	0	3.34803	0
23364	365.67	2	729.324	46.3318	0.484317	1.86981	B5XJ48	50S ribosomal protein L5 OS=Streptococcus pyogenes serotype M49 (strain NZ131) OX=471876 GN=rplE PE=3 SV=1	SIAGFR	SIAGFR	[1] Phospho (STY)	34.13	4.64638	2	100	100	LITKAKKSIAGFRLR	S	74					0											0.00277388	8.48105	2.82399	6.01388	2.77209	12.3003	0	4.97294	0.037527	4.40019	22.7603	26.0939	0	3.88695	1.74315
23479	1060.43	1	1059.43	33.3528	0.2998	8.86427	A0A0H3C124	Putative mannose-specific phosphotransferase system component IID OS=Streptococcus pyogenes serotype M49 (strain NZ131) OX=471876 GN=manN PE=4 SV=1	LYTSPEDR	LYTSPEDR	[4] Phospho (STY)	38.9	-1.16009	6	93.75	78.29	ALKKLYTSPEDRATA	S	50					0											0	0	0	0	0	0	0	0	0	0	93.9918	137.934	0	0	0
23629	685.804	2	1369.59	81.4056	0.566117	3.60111	A0A0H3BVU9	Response regulator CsrR OS=Streptococcus pyogenes serotype M49 (strain NZ131) OX=471876 GN=csrR PE=4 SV=1	DSIMDVVAGLDR	DSIMDVVAGLDR	[2] Phospho (STY)	29.43	-0.812737	2	100	100	MMMTARDSIMDVVAG	S	84					0											0	0	0	13.2135	3.78604	3.40695	0	5.24741	76.1665	3.07376	195.433	326.989	3.81934	100.022	159.169
23782	676.971	3	2027.89	65.7671	0.402167	2.90859	A0A0H3BZJ0	Formate acetyltransferase OS=Streptococcus pyogenes serotype M49 (strain NZ131) OX=471876 GN=pfl PE=3 SV=1	VFHEVLSMDDAAEAISSK	VFHEVLSMDDAAEAISSK	[7] Phospho (STY)	44.09	0.53353	5	99.91	90.634	RVFHEVLSMDDAAEA	S	764					0											2.21139	0	10.9611	3.21017	0	2.8985	0	12.9129	21.1301	191.146	917.618	1497.47	80.9915	118.756	154.322
23821	1007.41	2	2012.8	51.6785	0.44315	5.33241	B5XJR1	Elongation factor G OS=Streptococcus pyogenes serotype M49 (strain NZ131) OX=471876 GN=fusA PE=3 SV=1	LYDGSYHDVDSSETAFK					0						LYDGSYHDVDSSETAFK	[5] Phospho (STY)	7.0633	0.140633	2	KAKLYDGSYHDVDSS	S	569								0	12.7052	0	0	0	0	0	0	0	51.4026	229.829	82.6215	0	0	0
24238	1072.95	2	2143.88	28.3466	0.217883	6.09418	A0A0H3BXC6	Signal recognition particle receptor FtsY OS=Streptococcus pyogenes serotype M49 (strain NZ131) OX=471876 GN=ftsY PE=3 SV=1	QAQADASNDSAKEEAVDTSK					0						QAQADASNDSAKEEAVDTSK	[10] Phospho (STY)	6.5411	-4.47147	4	QADASNDSAKEEAVD	S	137								0	2.49939	3.62054	0	0	0	0	0	0	142.452	305.689	234.266	0	0	0
25269	1133.97	2	2265.92	51.5966	0.3817	6.02493	A0A0H3BZ03	R3H domain protein OS=Streptococcus pyogenes serotype M49 (strain NZ131) OX=471876 GN=Spy49_0209 PE=4 SV=1	VLESGQDYTMDPMSNSERK	VLESGQDYTMDPMSNSERK	[16] Phospho (STY)	40	-2.16019	3	86.66	61.1833	TMDPMSNSERKIVHK	S	270	VLESGQDYTMDPMSNSERK	[16] Phospho (STY)	7.4103	-2.17058	2	TMDPMSNSERKIVHK	S	270								0	0	0	5.82117	0	0	0	0	0	119.243	424.061	200.801	0	0	0
25361	918.373	1	917.366	44.2308	0.463867	7.61773	B5XJ99	30S ribosomal protein S4 OS=Streptococcus pyogenes serotype M49 (strain NZ131) OX=471876 GN=rpsD PE=3 SV=1	YTGPSWK	YTGPSWK	[5] Phospho (STY)	26.94	-2.95534	2	98.85	98.595	MSRYTGPSWKQSRRL	S	8					0											0	0	0	0	0	0	0	0	0	0	0	0	0	0	0
25377	646.622	3	1936.85	67.281	0.38195	3.1856	A0A0H3BZS4	dTDP-4-dehydrorhamnose 3_5-epimerase OS=Streptococcus pyogenes serotype M49 (strain NZ131) OX=471876 GN=rmlC PE=4 SV=1	EGETFGNVYQTVIDASK					0						EGETFGNVYQTVIDASK	[9] Phospho (STY)	6.7974	-0.0448644	3	GETFGNVYQTVIDAS	Y	109								0.398603	2.83193	1.91625	4.29084	0.382163	9.56347	0	0.340614	0	16.1608	83.8168	615.638	1.3234	8.36017	4.0538
26412	1023.45	1	1022.45	54.7674	0.307167	8.51801	A0A0H3BZL9	PTS system_ fructose-specific IIABC component OS=Streptococcus pyogenes serotype M49 (strain NZ131) OX=471876 GN=fruA PE=4 SV=1	TSLGGAFYK	TSLGGAFYK	[2] Phospho (STY)	48.42	-2.10801	7	95.67	72.9122	AVSTEKTSLGGAFYK	S	284					0											0	3.61923	0	0	0	0	0	0	0	0	76.5285	69.7766	0	0	0
26509	375.213	3	1122.62	42.1579	0.34075	1.93906	B5XLE2	50S ribosomal protein L10 OS=Streptococcus pyogenes serotype M49 (strain NZ131) OX=471876 GN=rplJ PE=3 SV=1	VIKNSILTR	VIKNSILTR	[5] Phospho (STY)	39.13	2.09754	3	99.82	99.4633	EFKVIKNSILTRAAE	S	59					0											0	0	0	2.53203	1.40326	3.3889	0	0	0	0	0	0	0	0	0
26566	936.408	1	935.401	38.2365	0.1362	7.89474	A0A0H3BXF8	Putative sugar ABC transporter OS=Streptococcus pyogenes serotype M49 (strain NZ131) OX=471876 GN=Spy49_0973c PE=4 SV=1	SVSFTTSK	SVSFTTSK	[1] Phospho (STY)	27.2	0.820804	3	96.01	94.65	AEMMVGRSVSFTTSK	S	241					0											0	0	0	0	0	0	0	0	0	41.273	159.607	93.2482	0	0	0
27133	688.063	4	2748.22	62.4731	0.279317	3.60111	A0A0H3BZV5	PTS system_ lactose-specific IIA component (EIIA-Lac) (Lactose-permease IIA component) (Phosphotransferase enzyme II_ A component) OS=Streptococcus pyogenes serotype M49 (strain NZ131) OX=471876 GN=lacF PE=4 SV=1	AEELIAAGSDCLNDAHNAQTSLLQK	AEELIAAGSDCLNDAHNAQTSLLQK	[11] Carbamidomethyl (C)|[21] Phospho (STY)	26.48	-7.76985	2	33.33	33.33	DAHNAQTSLLQKEAA	S	59	AEELIAAGSDCLNDAHNAQTSLLQK	[11] Carbamidomethyl (C)|[21] Phospho (STY)	6.7202	-7.8148	3	DAHNAQTSLLQKEAA	S	59								4.64252	43.28	53.8292	5.15248	6.77349	12.5043	0	4.52023	6.896	185.926	400.417	580.386	32.7766	101.055	110.988
28386	996.478	1	995.47	30.1271	0.5456	8.241	A0A0H3BY55	Non-specific serine/threonine protein kinase OS=Streptococcus pyogenes serotype M49 (strain NZ131) OX=471876 GN=Spy49_1257c PE=4 SV=1	VASGPTASVK	VASGPTASVK	[3] Phospho (STY)	65.04	1.43641	9	99.99	99.6033	KPLPKVASGPTASVK	S	299	VASGPTASVK	[3] Phospho (STY)	6.0557	1.51323	3	KPLPKVASGPTASVK	S	299								0	43.0263	46.2279	0	0	6.29013	0	61.9309	55.1195	1.46027	128.89	107.969	0	26.766	36.2934
28673	601.583	3	1801.73	30.2909	0.258833	2.70083	B5XJ72	DNA-directed RNA polymerase subunit beta OS=Streptococcus pyogenes serotype M49 (strain NZ131) OX=471876 GN=rpoB PE=3 SV=1	QAQETQEVSETTDEK					0						QAQETQEVSETTDEK	[5] Phospho (STY)	6.4581	1.35784	2	REKQAQETQEVSETT	T	1178								6.39699	48.486	27.1802	5.47086	8.35901	12.5239	0.527969	35.8517	58.7605	0.0389822	66.3435	192.714	1.58878	21.2426	32.2906
28709	351.825	3	1052.45	28.5925	0.20495	1.80055	A0A0H3BZB4	Phosphoenolpyruvate-protein phosphotransferase OS=Streptococcus pyogenes serotype M49 (strain NZ131) OX=471876 GN=ptsI PE=3 SV=1	TSHSAIMAR	TSHSAIMAR	[2] Phospho (STY)	23.34	5.24535	2	49.74	49.31	TNIGGRTSHSAIMAR	S	190					0											6.76686	0	20.667	3.3054	11.3126	2.28183	7.08025	6.0318	36.753	4.92441	7.2848	33.4042	12.0958	33.13	49.8424
28885	1154.51	2	2307.01	47.8668	0.32785	6.16343	A0A0H3BZ23	Cell division protein FtsZ OS=Streptococcus pyogenes serotype M49 (strain NZ131) OX=471876 GN=ftsZ PE=3 SV=1	TFTQTNAQQVAGAQYASDQAK					0						TFTQTNAQQVAGAQYASDQAK	[5] Phospho (STY)	6.9927	-5.07906	5	QPRTFTQTNAQQVAG	T	336								0	11.9729	0	0	0	0	0	3.66797	0	20.5805	77.4224	30.6537	3.59351	0	9.09784
29509	1281.08	2	2560.15	59.5686	0.2998	7.61773	A0A0H3BYW2	EIICB-Lac OS=Streptococcus pyogenes serotype M49 (strain NZ131) OX=471876 GN=lacE PE=4 SV=1	VYDEQILAEEAAGTNSSDALKEK	VYDEQILAEEAAGTNSSDALKEK	[17] Phospho (STY)	79.4	-2.71064	5	49.26	39.29	EAAGTNSSDALKEKV	S	428	VYDEQILAEEAAGTNSSDALKEK	[17] Phospho (STY)	7.0388	-2.71983	4	EAAGTNSSDALKEKV	S	428								0	0	0	0	0	0	0	0	0	134.339	340.602	402.761	5.20131	0	0
29641	1018.39	1	1017.38	33.3323	0.2998	8.241	A0A0H3BYC1	DNA-directed RNA polymerase subunit alpha OS=Streptococcus pyogenes serotype M49 (strain NZ131) OX=471876 GN=rpoA PE=3 SV=1	VGSNDGFDK	VGSNDGFDK	[3] Phospho (STY)	33.08	-1.6266	2	100	100	VEPARVGSNDGFDKL	S	185	VGSNDGFDK	[3] Phospho (STY)	6.0996	-1.55144	2	VEPARVGSNDGFDKL	S	185								0	0	0	0	0	0	0	0	0	11.6221	111.903	100.833	0	0	0
30006	394.168	3	1179.48	28.2311	0.402233	1.86981	A0A0H3BWH3	Putative calcium-transporting ATPase OS=Streptococcus pyogenes serotype M49 (strain NZ131) OX=471876 GN=pacL PE=4 SV=1	DGHVTEIDSK	DGHVTEIDSK	[5] Phospho (STY)	28.82	2.07099	2	99.78	99.64	IRRDGHVTEIDSKEL	T	134					0											1.43184	3.93941	5.68826	17.928	11.8072	7.81545	3.5006	10.3854	8.4362	58.493	140.621	190.646	2.17747	12.7932	6.68479
30030	973.413	1	972.405	37.0908	0.238517	8.241	A0A0H3BZ23	Cell division protein FtsZ OS=Streptococcus pyogenes serotype M49 (strain NZ131) OX=471876 GN=ftsZ PE=3 SV=1	AEQVSGFR	AEQVSGFR	[5] Phospho (STY)	38.28	-1.17979	9	100	100	QEKAEQVSGFRQPRT	S	325					0											0	0	0	0	0	0	0	0	0	0	14.5353	36.7534	0	0	0
30764	1049.43	1	1048.43	41.0055	0.266317	8.65651	A0A0H3C049	Spi SpeB protease inhibitor OS=Streptococcus pyogenes serotype M49 (strain NZ131) OX=471876 GN=Spy49_1689c PE=4 SV=1	SMIEAYQK	SMIEAYQK	[1] Phospho (STY)	46.64	-4.28121	3	100	99.81	LNHDNVRSMIEAYQK	S	88					0											0	0	0	0	0	0	0	0	0	75.2668	268.568	164.982	0	0	0
31829	1102.49	1	1101.49	42.8601	0.2459	9.27978	B5XIW7	60 kDa chaperonin OS=Streptococcus pyogenes serotype M49 (strain NZ131) OX=471876 GN=groL PE=3 SV=1	DIKFSADAR	DIKFSADAR	[5] Phospho (STY)	39.46	1.69821	3	100	100	MAKDIKFSADARAAM	S	8					0											0	0	0	0	0	0	0	0	0	0	0	0	0	0	0
31964	1421.67	1	1420.67	39.9143	0.163817	11.7036	A0A0H3BYM9	Glyceraldehyde-3-phosphate dehydrogenase OS=Streptococcus pyogenes serotype M49 (strain NZ131) OX=471876 GN=plr PE=3 SV=1	AGAANIVPNSTGAAK	AGAANIVPNSTGAAK	[11] Phospho (STY)	46.46	-3.64578	6	77.78	57.5963	ANIVPNSTGAAKAIG	T	212					0											0	0	0	0	4.34125	3.10913	0	0	0	0	0	0	0	19.9984	96.7603
32190	939.45	2	1876.88	37.2679	0.279483	5.0554	A0A0H3BY55	Non-specific serine/threonine protein kinase OS=Streptococcus pyogenes serotype M49 (strain NZ131) OX=471876 GN=Spy49_1257c PE=4 SV=1	LDQTNQTDALQPPTKK					0						LDQTNQTDALQPPTKK	[7] Phospho (STY)	5.9588	-4.32978	3	RLDQTNQTDALQPPT	T	327								0	204.172	104.147	19.6627	44.7058	0	0	170.347	102.24	0	27.6002	0	28.2717	156.734	109.504
32359	542.597	3	1624.77	54.747	0.327633	2.63158	A0A0H3C0R9	Phosphopantothenoylcysteine synthetase OS=Streptococcus pyogenes serotype M49 (strain NZ131) OX=471876 GN=dpfB PE=4 SV=1	ALLISNNEVASADTK	ALLISNNEVASADTK	[14] Phospho (STY)	67.92	-0.628119	2	99.67	92.8333	NEVASADTKEAIADL	T	214					0											5.10786	21.9066	0	14.8547	2.18509	28.4475	0.965931	2.80031	20.3612	18.1603	42.4006	442.69	13.0914	36.1093	100.671
32853	976.021	2	1950.03	45.3222	0.320517	5.33241	B5XM21	Uridine kinase OS=Streptococcus pyogenes serotype M49 (strain NZ131) OX=471876 GN=udk PE=3 SV=1	KPIIIGVTGGSGGGKTSVSR	KPIIIGVTGGSGGGKTSVSR	[16] Phospho (STY)	59.76	-1.72024	12	85.89	67.4042	GGSGGGKTSVSRAIL	T	19					0											0	84.8424	37.5455	30.5471	36.9932	3.61627	0	88.9556	29.4133	0	59.4046	26.7349	20.5645	31.1036	34.5311
33473	1258.09	2	2514.17	48.1461	0.1974	7.06371	A0A0H3BZR7	Mid-cell-anchored protein Z OS=Streptococcus pyogenes serotype M49 (strain NZ131) OX=471876 GN=mapZ PE=3 SV=1	SEESKEVEVTKESQTLGLNEAK	SEESKEVEVTKESQTLGLNEAK	[10] Phospho (STY)	69.2	-2.69285	4	99.32	97.605	ESKEVEVTKESQTLG	T	11					0											13.8922	112.28	69.5693	0	0	0	0	70.3086	54.1995	0	0	0	28.1144	91.4848	128.818
33948	1159.48	1	1158.47	38.203	0.17715	9.76454	A0A0H3BZ76	Putative phosphoprotein phosphatase (PppL protein) OS=Streptococcus pyogenes serotype M49 (strain NZ131) OX=471876 GN=pppL PE=4 SV=1	SNNQDFINK	SNNQDFINK	[1] Phospho (STY)	44.87	1.40254	5	100	100	TDIGQKRSNNQDFIN	S	14					0											0	0	0	0	0	0	0	0	0	3.92816	60.2913	61.04	0	0	0
34098	621.323	4	2481.26	82.1562	0.32045	3.60111	A0A0H3C1H3	Fructose-bisphosphate aldolase class II OS=Streptococcus pyogenes serotype M49 (strain NZ131) OX=471876 GN=fba PE=4 SV=1	LTAAVPGFPIVLHGGSGIPDDQIK	LTAAVPGFPIVLHGGSGIPDDQIK	[16] Phospho (STY)	50.49	-1.07558	2	100	99.965	PIVLHGGSGIPDDQI	S	211					0											0	0	0	0	0	0	0	0	0	0	0	0	0	0	0
34215	627.784	2	1253.55	28.2925	0.0614333	2.00831	A0A0H3BZL9	PTS system_ fructose-specific IIABC component OS=Streptococcus pyogenes serotype M49 (strain NZ131) OX=471876 GN=fruA PE=4 SV=1	VETNGASGVANR					0						VETNGASGVANR	[7] Phospho (STY)	6.6791	11.2076	2	KVETNGASGVANRLT	S	205								0	0	0	0	0	0	0	0	0	0	0	0	0	0	0
34518	860.393	2	1718.77	35.7741	0.176933	4.63989	A0A0H3BYY9	Superoxide dismutase OS=Streptococcus pyogenes serotype M49 (strain NZ131) OX=471876 GN=sodM PE=3 SV=1	HHATYVANTNAALEK					0						HHATYVANTNAALEK	[4] Phospho (STY)	7.2732	-3.64579	2	HHDKHHATYVANTNA	T	34								0	0	0	0	0	0	0	0	0	0	24.0229	2.55898	0	0	0
35314	1197.59	1	1196.58	28.8308	0.156467	10.1108	A0A0H3C1S0	CsbD domain-containing protein OS=Streptococcus pyogenes serotype M49 (strain NZ131) OX=471876 GN=Spy49_1665c PE=3 SV=1	SKIEQASGGLK	SKIEQASGGLK	[7] Phospho (STY)	50.11	1.89654	5	99.95	99.8783	KSKIEQASGGLKEGA	S	14					0											0	3.8197	0	0	0	0	0	0	0	0	0	0	0	0	0
36300	474.566	3	1420.67	39.9553	0.22525	2.21607	A0A0H3BYM9	Glyceraldehyde-3-phosphate dehydrogenase OS=Streptococcus pyogenes serotype M49 (strain NZ131) OX=471876 GN=plr PE=3 SV=1	AGAANIVPNSTGAAK	AGAANIVPNSTGAAK	[11] Phospho (STY)	47.95	2.55187	4	79.29	60.1375	ANIVPNSTGAAKAIG	T	212					0											6.23744	31.3845	27.0148	7.70456	16.9069	39.5182	4.34565	15.9969	21.3039	3.89928	10.9589	23.8304	20.2437	86.7731	102.684
36689	1186.5	2	2370.98	57.9801	0.27955	6.37119	B5XKI2	Triosephosphate isomerase OS=Streptococcus pyogenes serotype M49 (strain NZ131) OX=471876 GN=tpiA PE=3 SV=1	VAAQNCYFENTGAFTGETSPK					0						VAAQNCYFENTGAFTGETSPK	[6] Carbamidomethyl (C)|[11] Phospho (STY)	7.4799	-0.540382	4	QNCYFENTGAFTGET	T	72								0	7.07941	0	0	0	0	0	0	0	0	0	0	0	0	0
36755	875.408	2	1748.8	43.726	0.0409667	0	A0A0H3BY55	Non-specific serine/threonine protein kinase OS=Streptococcus pyogenes serotype M49 (strain NZ131) OX=471876 GN=Spy49_1257c PE=4 SV=1	LDQTNQTDALQPPTK					0						LDQTNQTDALQPPTK	[4] Phospho (STY)	7.3039	2.21519	3	QESRLDQTNQTDALQ	T	324								0	0	0	0	0	0	0	0	0	0	0	0	0	6.95162	0
36998	915.995	2	1829.98	52.7491	0.2998	5.19391	A0A0H3BVE1	30S ribosomal protein S5 OS=Streptococcus pyogenes serotype M49 (strain NZ131) OX=471876 GN=rpsE PE=3 SV=1	VLLKPAVEGSGVAAGGAVR					0						VLLKPAVEGSGVAAGGAVR	[10] Phospho (STY)	6.565	-0.344745	2	LKPAVEGSGVAAGGA	S	102								0	1.51128	0.409551	0.0182675	0	0	0	0	0	0.935313	3.45647	0.572728	0	0.0756907	0
40047	1024.47	2	2046.93	94.1997	0.361433	5.47091	A0A0H3BZS7	DAK2 domain protein OS=Streptococcus pyogenes serotype M49 (strain NZ131) OX=471876 GN=Spy49_1556c PE=4 SV=1	SNITTSLFQEMVQAAATR	SNITTSLFQEMVQAAATR	[6] Phospho (STY)	47.78	-4.84862	2	29.25	28.52	-MSNITTSLFQEMVQ	S	7					0											0	0	0	0	0	0	0	0	0	0	0	0	0	0	0
40321	498.914	3	1493.72	56.6631	0.1843	2.49307	A0A0H3C1H3	Fructose-bisphosphate aldolase class II OS=Streptococcus pyogenes serotype M49 (strain NZ131) OX=471876 GN=fba PE=4 SV=1	QAPVLIQTSMGAAK	QAPVLIQTSMGAAK	[9] Phospho (STY)	31.68	-8.42816	3	85.25	83.1533	APVLIQTSMGAAKYM	S	50					0											0	0	0	2.99515	4.04442	20.8266	0	0	1.98326	0	2.17361	0	1.86338	4.95529	6.6992
41242	1369.64	1	1368.63	38.1003	0.16405	11.4958	A0A0H3BZ18	Cell-division initiation protein OS=Streptococcus pyogenes serotype M49 (strain NZ131) OX=471876 GN=divIVA PE=4 SV=1	ATANAEATNLVSK	ATANAEATNLVSK	[12] Phospho (STY)	97.18	2.31849	3	100	99.4783	AEATNLVSKATYDAQ	S	94	ATANAEATNLVSK	[12] Phospho (STY)	6.9568	2.3013	3	AEATNLVSKATYDAQ	S	94								0	0	0	0	0	0	0	0	0	4.43976	88.8171	187.688	0	0	0
41510	896.389	2	1790.76	32.807	0.15645	4.63989	A0A0H3BY05	Carbamate kinase OS=Streptococcus pyogenes serotype M49 (strain NZ131) OX=471876 GN=arcC PE=3 SV=1	KQMAESGASFKEDAGR					0						KQMAESGASFKEDAGR	[6] Phospho (STY)	6.4036	-1.42502	2	AKKQMAESGASFKED	S	147								0	0	0	0	0	0	0	0	0	41.573	114.926	97.9667	0	0	0
41780	547.548	3	1639.62	68.6109	0.286683	2.42382	B5XLC6	Elongation factor 4 OS=Streptococcus pyogenes serotype M49 (strain NZ131) OX=471876 GN=lepA PE=3 SV=1	GDFVTMDYIDDNR	GDFVTMDYIDDNR	[5] Phospho (STY)	63.13	-0.926816	4	100	99.9875	RRRGDFVTMDYIDDN	T	440					0											0	0	0	0	0	0	0	0	0	0	57.5401	190.398	0	0	0
41966	570.593	3	1708.76	76.5221	0.205017	2.70083	A0A0H3BZR7	Mid-cell-anchored protein Z OS=Streptococcus pyogenes serotype M49 (strain NZ131) OX=471876 GN=mapZ PE=3 SV=1	YTELDTASLDNFIK					0						YTELDTASLDNFIK	[1] Phospho (STY)	6.7994	-1.67707	3	SQKFDAKYTELDTAS	Y	68								0	3.05786	2.1868	0	0	0	0	3.24491	10.5436	0	3.23804	60.5763	2.75583	31.0916	89.0281
42419	358.823	3	1073.45	24.4734	0.1975	1.5928	A0A0H3BYQ9	PTS system, IIB component OS=Streptococcus pyogenes serotype M49 (strain NZ131) OX=471876 GN=Spy49_0834 PE=4 SV=1	FDKSDPASK	FDKSDPASK	[4] Phospho (STY)	53.3	3.59451	2	99.88	99.74	NVGRFDKSDPASKVK	S	112					0											0	0	0	0	0	0	0	0.882408	0	15.5908	46.8473	102.913	0	1.97998	0
42526	1004.4	1	1003.4	40.1805	0.07455	8.31025	B5XJ02	UPF0297 protein Spy49_1751c OS=Streptococcus pyogenes serotype M49 (strain NZ131) OX=471876 GN=Spy49_1751c PE=3 SV=1	GFTDETVR	GFTDETVR	[3] Phospho (STY)	34.61	-5.6316	3	99.76	99.6425	----MGFTDETVRFK	T	4					0											0	0	0	0	0	0	0	0	0	0	0	0	0	0	0
42790	939.431	1	938.424	40.6982	0.1155	7.96399	B5XK64	Ribosome-recycling factor OS=Streptococcus pyogenes serotype M49 (strain NZ131) OX=471876 GN=frr PE=3 SV=1	ANASLLDR	ANASLLDR	[4] Phospho (STY)	42.69	1.56298	4	100	100	RAGRANASLLDRIQV	S	35					0											0	0	0	0	0	0	0	0	0	0	11.1815	4.36267	0	0	0
[truncated: 65 more columns]

## Sheet: Exp 2 HDMSE
										Mascot										Ion accounting								Spectral library							Peptide raw abundance
																																			THY 0.8		THY ME		THY exp		THY stat		THY late stat		CDMF ME		CDMF exp		CDMF stat
Feature	m/z	Charge	Mass	Retention time (min)	Retention time window (min)	Drift time (ms)	UniProt Acc. No.	Protein name	Peptide sequence	Peptide sequence	Modifications [position]	Peptide score	Mass error (ppm)	Spectral counts	Max local probab	Mean pocal probab	15 AS window	Residue	Position	Peptide sequence	Modifications [position]	Peptide score	Mass error (ppm)	Spectral counts	15 AS window	Residue	Position	Peptide sequence	Modifications [position]	Peptide score	Mass error (ppm)	15 AS window	Residue	Position	10092021_Spy_Phos_THY08_HDMSe_01	10092021_Spy_Phos_THY08_HDMSe_02	10092021_Spy_Phos_THY15_HDMSe_01	10092021_Spy_Phos_THY15_HDMSe_02	10092021_Spy_Phos_THYexpo_HDMSe_01	10092021_Spy_Phos_THYexpo_HDMSe_02	10092021_Spy_Phos_THY20h_HDMSe_01	10092021_Spy_Phos_THY20h_HDMSe_02	10092021_Spy_Phos_THY3d_HDMSe_01	10092021_Spy_Phos_THY3d_HDMSe_02	10092021_Spy_Phos_Fru15_HDMSe_01	10092021_Spy_Phos_Fru15_HDMSe_02	10092021_Spy_Phos_Fruexpo_HDMSe_01	10092021_Spy_Phos_Fruexpo_HDMSe_02	10092021_Spy_Phos_Fru20h_HDMSe_01
3	875.413	2	1748.81	42.8805	5.32693	4.98615	A0A0H3BY55	Non-specific serine/threonine protein kinase OS=Streptococcus pyogenes serotype M49 (strain NZ131) OX=471876 GN=Spy49_1257c PE=4	LDQTNQTDALQPPTK	LDQTNQTDALQPPTK	[4] Phospho (STY)	100.65	7.37026	26	100	97.519	QESRLDQTNQTDALQ	T	324	LDQTNQTDALQPPTK	[4] Phospho (STY)	6.1752	7.3568	11	QESRLDQTNQTDALQ	T	324	LDQTNQTDALQPPTK	[4] Phospho (STY)	68.1452	7.38707	QESRLDQTNQTDALQ	T	324	1.42407e+06	1.55462e+06	811254	870269	1.2587e+06	1.23464e+06	490039	477380	390218	394633	1.49457e+06	1.51211e+06	1.72679e+06	1.66478e+06	1.77258e+06
16	1090.48	3	3268.42	67.6446	2.32602	4.84765	A0A0H3BZ18	Cell-division initiation protein OS=Streptococcus pyogenes serotype M49 (strain NZ131) OX=471876 GN=divIVA PE=4	ELEAYQLDSQSDSTTEPEVNLSETQTFK	ELEAYQLDSQSDSTTEPEVNLSETQTFK	[24] Phospho (STY)	188.41	1.7867	22	98.38	82.4704	PEVNLSETQTFKLNI	T	245	ELEAYQLDSQSDSTTEPEVNLSETQTFK	[24] Phospho (STY)	8.4128	1.7795	24	PEVNLSETQTFKLNI	T	245	ELEAYQLDSQSDSTTEPEVNLSETQTFK	[24] Phospho (STY)	61.6892	1.7651	PEVNLSETQTFKLNI	T	245	397895	373866	337382	282531	436484	412476	157999	144728	48279.1	48957	533319	502367	955703	919519	642054
20	803.403	2	1604.79	55.3757	1.49373	4.15512	A0A0H3BY55	Non-specific serine/threonine protein kinase OS=Streptococcus pyogenes serotype M49 (strain NZ131) OX=471876 GN=Spy49_1257c PE=4	LSPPTPTVLTQESR	LSPPTPTVLTQESR	[10] Phospho (STY)	63.11	5.91829	15	99.63	94.0927	PPTPTVLTQESRLDQ	T	316					0				LSPPTPTVLTQESR	[10] Phospho (STY)	25.6119	5.93662	PPTPTVLTQESRLDQ	T	316	329976	319849	195087	215492	229535	245919	101639	102800	88483.8	92418	333951	344263	363676	360352	375009
24	828.396	3	2482.17	49.2163	1.13243	3.60111	A0A0H3BZD6	Putative PTS system enzyme II OS=Streptococcus pyogenes serotype M49 (strain NZ131) OX=471876 GN=Spy49_1737c PE=4	TEDEAKLPETPVSDAPVATAPHK	TEDEAKLPETPVSDAPVATAPHK	[13] Phospho (STY)	164.2	1.87194	22	100	94.9791	KLPETPVSDAPVATA	S	507	TEDEAKLPETPVSDAPVATAPHK	[13] Phospho (STY)	6.4434	1.86246	3	KLPETPVSDAPVATA	S	507	TEDEAKLPETPVSDAPVATAPHK	[13] Phospho (STY)	57.8433	1.83401	KLPETPVSDAPVATA	S	507	31829.1	31891	11631.3	12290.9	6096.78	6108.65	159142	141216	118936	111111	28058.4	28004.5	28571.4	27340.7	42746.1
29	565.964	3	1694.87	59.7546	1.05053	3.11634	A0A0H3BY55	Non-specific serine/threonine protein kinase OS=Streptococcus pyogenes serotype M49 (strain NZ131) OX=471876 GN=Spy49_1257c PE=4	IIFEDVESTKPLPK	IIFEDVESTKPLPK	[9] Phospho (STY)	75.44	10.826	21	92.32	77.4368	IFEDVESTKPLPKVA	T	291	IIFEDVESTKPLPK	[9] Phospho (STY)	6.0788	10.8121	5	IFEDVESTKPLPKVA	T	291	IIFEDVESTKPLPK	[9] Phospho (STY)	73.1092	10.9023	IFEDVESTKPLPKVA	T	291	208887	208217	54494.5	52913.1	84490.6	93014	26072.7	32334.4	20536.5	22842.4	102542	110233	186695	204174	263161
30	678.327	3	2031.96	57.6331	1.2964	3.11634	A0A0H3BYP4	Phosphoglucosamine mutase OS=Streptococcus pyogenes serotype M49 (strain NZ131) OX=471876 GN=glmM PE=3	ASAGVMISASHNPALDNGIK	ASAGVMISASHNPALDNGIK	[10] Phospho (STY)	123.46	6.49906	25	99.8	87.11	AGVMISASHNPALDN	S	100	ASAGVMISASHNPALDNGIK	[10] Phospho (STY)	7.0837	6.53669	15	AGVMISASHNPALDN	S	100	ASAGVMISASHNPALDNGIK	[8] Phospho (STY)	46.0309	6.56274	ASAGVMISASHNPAL	S	98	205103	182293	39484.2	40775.7	44140	40425.6	169630	172095	136825	144549	90837.8	92692.7	293834	291284	297531
34	828.395	3	2482.16	47.0207	0.484083	4.15512	A0A0H3BZD6	Putative PTS system enzyme II OS=Streptococcus pyogenes serotype M49 (strain NZ131) OX=471876 GN=Spy49_1737c PE=4	TEDEAKLPETPVSDAPVATAPHK	TEDEAKLPETPVSDAPVATAPHK	[10] Phospho (STY)	114.77	0.132637	20	99.98	95.4159	DEAKLPETPVSDAPV	T	504	TEDEAKLPETPVSDAPVATAPHK	[10] Phospho (STY)	6.4683	0.123156	3	DEAKLPETPVSDAPV	T	504								20753.5	21757.9	7468.24	6766.75	3626.68	3078.14	93761	96192.6	74342.7	76555.5	22732.1	21920.7	23319.4	23340.8	29004.6
41	1314.58	3	3940.72	64.6168	1.7799	5.74792	A0A0H3BZ18	Cell-division initiation protein OS=Streptococcus pyogenes serotype M49 (strain NZ131) OX=471876 GN=divIVA PE=4	VDESNKELEAYQLDSQSDSTTEPEVNLSETQTFK	VDESNKELEAYQLDSQSDSTTEPEVNLSETQTFK	[30] Phospho (STY)	176.83	-1.32463	8	46.79	36.7229	PEVNLSETQTFKLNI	T	245	VDESNKELEAYQLDSQSDSTTEPEVNLSETQTFK	[30] Phospho (STY)	8.4182	-1.30523	16	PEVNLSETQTFKLNI	T	245	VDESNKELEAYQLDSQSDSTTEPEVNLSETQTFK	[30] Phospho (STY)	69.4008	-1.37389	PEVNLSETQTFKLNI	T	245	117957	96537.1	148960	116860	172568	145566	49483.3	49687	11797.1	10685.6	213110	191571	479029	464758	339246
43	610.32	2	1218.63	34.8461	1.30937	3.3241	B5XKI1	Elongation factor Tu OS=Streptococcus pyogenes serotype M49 (strain NZ131) OX=471876 GN=tuf PE=3	RLPTSVNQPK	RLPTSVNQPK	[5] Phospho (STY)	47.45	11.0387	22	95.45	74.6507	LARRLPTSVNQPKDY	S	43	RLPTSVNQPK	[5] Phospho (STY)	8.0911	11.1014	5	LARRLPTSVNQPKDY	S	43	RLPTSVNQPK	[5] Phospho (STY)	78.3986	11.0001	LARRLPTSVNQPKDY	S	43	28280.5	31872.3	21507.8	22952.1	11906.5	12550.7	114341	118714	119191	121333	35614.2	36835.7	35643	36481.3	92543
44	732.375	3	2194.1	91.1945	0.82485	3.39335	B5XKI1	Elongation factor Tu OS=Streptococcus pyogenes serotype M49 (strain NZ131) OX=471876 GN=tuf PE=3	DTDKPLLLPVEDVFSITGR	DTDKPLLLPVEDVFSITGR	[17] Phospho (STY)	81.01	4.45252	22	98.82	75.8187	VEDVFSITGRGTVAS	T	225	DTDKPLLLPVEDVFSITGR	[17] Phospho (STY)	8.3804	4.48737	17	VEDVFSITGRGTVAS	T	225	DTDKPLLLPVEDVFSITGR	[17] Phospho (STY)	65.6726	4.42034	VEDVFSITGRGTVAS	T	225	3688.68	3331.66	10652.4	8989.06	6723.14	3161.82	174616	149234	192425	187590	10494.5	10768.1	31945.9	26262.6	73534.9
45	828.099	3	2481.28	82.3963	0.988933	4.22438	A0A0H3C1H3	Fructose-bisphosphate aldolase class II OS=Streptococcus pyogenes serotype M49 (strain NZ131) OX=471876 GN=fba PE=4	LTAAVPGFPIVLHGGSGIPDDQIK	LTAAVPGFPIVLHGGSGIPDDQIK	[16] Phospho (STY)	74.55	3.72019	14	100	99.9793	PIVLHGGSGIPDDQI	S	211	LTAAVPGFPIVLHGGSGIPDDQIK	[16] Phospho (STY)	8.0541	3.75101	18	PIVLHGGSGIPDDQI	S	211	LTAAVPGFPIVLHGGSGIPDDQIK	[16] Phospho (STY)	46.8908	3.77234	PIVLHGGSGIPDDQI	S	211	16249.9	15910	16041.7	14264.4	11886.6	11184.5	206368	205034	281384	278075	18560.9	22765.7	80550	80305	296968
48	1131.48	2	2260.94	58.8476	2.14198	6.23269	A0A0H3BZ18	Cell-division initiation protein OS=Streptococcus pyogenes serotype M49 (strain NZ131) OX=471876 GN=divIVA PE=4	TVLNEDIPESDDSASFDATR	TVLNEDIPESDDSASFDATR	[19] Phospho (STY)	80.55	1.03234	21	99.87	92.5428	DSASFDATRQFTPEE	T	201	TVLNEDIPESDDSASFDATR	[19] Phospho (STY)	8.1171	1.06616	24	DSASFDATRQFTPEE	T	201	TVLNEDIPESDDSASFDATR	[19] Phospho (STY)	92.5345	1.08957	DSASFDATRQFTPEE	T	201	204696	186583	119053	114988	103700	104736	58703.5	57074.3	38875.7	40279.1	151807	144250	101120	102484	230945
54	679.314	2	1356.61	74.6896	1.00955	3.60111	A0A0H3C124	Putative mannose-specific phosphotransferase system component IID OS=Streptococcus pyogenes serotype M49 (strain NZ131) OX=471876 GN=manN PE=4	DMSGGILQDITK	DMSGGILQDITK	[3] Phospho (STY)	83.98	9.58901	26	100	99.9983	SEITKDMSGGILQDI	S	174	DMSGGILQDITK	[3] Phospho (STY)	7.9925	9.57167	10	SEITKDMSGGILQDI	S	174	DMSGGILQDITK	[3] Phospho (STY)	85.5139	9.55432	SEITKDMSGGILQDI	S	174	24208.8	24338.9	21555.7	21586.4	12927.8	12586.3	124045	124027	237774	247973	23134.2	23204.8	26880.6	26137.8	94869.5
59	711.348	2	1420.68	39.2654	1.24775	3.73961	A0A0H3BYM9	Glyceraldehyde-3-phosphate dehydrogenase OS=Streptococcus pyogenes serotype M49 (strain NZ131) OX=471876 GN=plr PE=3	AGAANIVPNSTGAAK	AGAANIVPNSTGAAK	[11] Phospho (STY)	48.71	7.07481	18	78.98	54.1213	ANIVPNSTGAAKAIG	T	212	AGAANIVPNSTGAAK	[10] Phospho (STY)	8.3883	7.05824	5	AANIVPNSTGAAKAI	S	211	AGAANIVPNSTGAAK	[10] Phospho (STY)	90.107	7.11207	AANIVPNSTGAAKAI	S	211	66407.6	72290.6	73473.6	80988.4	53511.1	54628.5	134267	138287	136432	139422	93464.4	96498.2	108361	105512	179059
63	627.784	2	1253.55	27.0579	0.688867	3.1856	A0A0H3BZL9	PTS system, fructose-specific IIABC component OS=Streptococcus pyogenes serotype M49 (strain NZ131) OX=471876 GN=fruA PE=4	VETNGASGVANR	VETNGASGVANR	[7] Phospho (STY)	96.88	10.0524	19	100	99.4568	KVETNGASGVANRLT	S	205	VETNGASGVANR	[7] Phospho (STY)	7.3296	10.0337	3	KVETNGASGVANRLT	S	205	VETNGASGVANR	[7] Phospho (STY)	87.9004	10.0947	KVETNGASGVANRLT	S	205	25132.6	27359.4	29618	30438.1	19561.9	22021.6	102811	100628	71883.7	84773.2	35868.5	40345.7	25264.4	26669.8	33165.4
64	1025.21	4	4096.83	61.9915	1.71847	3.80886	A0A0H3BZ18	Cell-division initiation protein OS=Streptococcus pyogenes serotype M49 (strain NZ131) OX=471876 GN=divIVA PE=4	RVDESNKELEAYQLDSQSDSTTEPEVNLSETQTFK	RVDESNKELEAYQLDSQSDSTTEPEVNLSETQTFK	[31] Phospho (STY)	170.72	0.545827	11	37.3	33.3842	PEVNLSETQTFKLNI	T	245	RVDESNKELEAYQLDSQSDSTTEPEVNLSETQTFK	[31] Phospho (STY)	8.379	0.564492	21	PEVNLSETQTFKLNI	T	245	RVDESNKELEAYQLDSQSDSTTEPEVNLSETQTFK	[31] Phospho (STY)	48.1775	0.571669	PEVNLSETQTFKLNI	T	245	59216.5	42103.5	123848	100792	77574.7	47178.3	48577.6	43799.7	9615.58	9316.26	119456	58522.6	410197	352697	445317
66	708.792	2	1415.57	45.1791	0.886617	3.67036	B5XKI1	Elongation factor Tu OS=Streptococcus pyogenes serotype M49 (strain NZ131) OX=471876 GN=tuf PE=3	DYASIDAAPEER	DYASIDAAPEER	[4] Phospho (STY)	82.64	6.92905	26	100	100	NQPKDYASIDAAPEE	S	52	DYASIDAAPEER	[4] Phospho (STY)	8.3116	6.91242	10	NQPKDYASIDAAPEE	S	52	DYASIDAAPEER	[4] Phospho (STY)	89.7958	6.8958	NQPKDYASIDAAPEE	S	52	26446.9	27220.4	21779.8	22211.3	16210.2	16274.1	106026	110434	139807	142092	30611.9	31813.6	35244.3	36769.5	77744
69	683.66	3	2047.96	52.7906	1.49352	2.97784	A0A0H3BYP4	Phosphoglucosamine mutase OS=Streptococcus pyogenes serotype M49 (strain NZ131) OX=471876 GN=glmM PE=3	ASAGVMISASHNPALDNGIK	ASAGVMISASHNPALDNGIK	[6] Oxidation (M)|[10] Phospho (STY)	135.81	8.27848	26	99.79	86.4877	AGVMISASHNPALDN	S	100					0				ASAGVMISASHNPALDNGIK	[6] Oxidation (M)|[10] Phospho (STY)	41.5645	8.24401	AGVMISASHNPALDN	S	100	183372	178575	41322.8	42179.7	43510.8	45454	150509	149104	159283	164939	110679	108613	278387	274078	270992
72	698.31	2	1394.61	48.4527	0.873467	3.80886	A0A0H3BZP2	Arsenate reductase OS=Streptococcus pyogenes serotype M49 (strain NZ131) OX=471876 GN=arsC PE=3	EDGESVNPIEVK	EDGESVNPIEVK	[5] Phospho (STY)	83.73	7.02043	26	100	100	YMKEDGESVNPIEVK	S	131					0				EDGESVNPIEVK	[5] Phospho (STY)	87.8685	6.98668	YMKEDGESVNPIEVK	S	131	31385.5	34196.7	40941.8	42301.1	24953	27522.4	30033.3	32037.1	21573.4	23653.3	66951.4	68961.8	163341	159814	182487
75	559.274	2	1116.53	55.86	0.9685	3.04709	B5XKM7	Enolase OS=Streptococcus pyogenes serotype M49 (strain NZ131) OX=471876 GN=eno PE=3	SIITDVYAR	SIITDVYAR	[1] Phospho (STY)	57.67	11.1677	24	99.98	96.5479	------MSIITDVYA	S	2	SIITDVYAR	[1] Phospho (STY)	8.3929	11.1466	4	------MSIITDVYA	S	2	SIITDVYAR	[1] Phospho (STY)	98.2709	11.1256	------MSIITDVYA	S	2	63823	61631.8	62322.8	69655.7	49871.6	60711.3	90166.2	89100.4	127695	130615	44540.7	46134.4	23392.4	24306.9	12218.1
78	608.66	3	1822.96	55.4372	0.689217	3.25485	A0A0H3BY55	Non-specific serine/threonine protein kinase OS=Streptococcus pyogenes serotype M49 (strain NZ131) OX=471876 GN=Spy49_1257c PE=4	KIIFEDVESTKPLPK	KIIFEDVESTKPLPK	[10] Phospho (STY)	72.64	5.95589	13	88.98	73.1953	IFEDVESTKPLPKVA	T	291	KIIFEDVESTKPLPK	[10] Phospho (STY)	6.1175	5.94298	6	IFEDVESTKPLPKVA	T	291	KIIFEDVESTKPLPK	[10] Phospho (STY)	60.5217	5.98493	IFEDVESTKPLPKVA	T	291	98276.9	86531.5	10497.8	12483.4	14359.5	13711.3	6666.78	6448.28	2200.99	2261.21	20636.3	20108.8	65198.6	63817.6	136395
86	848.436	2	1694.86	59.7546	0.853133	5.12465	A0A0H3BY55	Non-specific serine/threonine protein kinase OS=Streptococcus pyogenes serotype M49 (strain NZ131) OX=471876 GN=Spy49_1257c PE=4	IIFEDVESTKPLPK	IIFEDVESTKPLPK	[9] Phospho (STY)	75.44	2.49194	21	92.39	82.2604	IFEDVESTKPLPKVA	T	291	IIFEDVESTKPLPK	[9] Phospho (STY)	6.5071	2.47805	12	IFEDVESTKPLPKVA	T	291	IIFEDVESTKPLPK	[9] Phospho (STY)	65.9433	2.56829	IFEDVESTKPLPKVA	T	291	94637.3	97455.1	37162.3	34176.7	57211.7	58795.4	15487.7	14661	11138	11578	49496.7	51171.9	104091	104486	149292
88	603.97	3	1808.89	47.7022	1.43202	3.11634	A0A0H3BZD6	Putative PTS system enzyme II OS=Streptococcus pyogenes serotype M49 (strain NZ131) OX=471876 GN=Spy49_1737c PE=4	LPETPVSDAPVATAPHK	LPETPVSDAPVATAPHK	[7] Phospho (STY)	83.93	10.2051	26	99.43	88.1818	KLPETPVSDAPVATA	S	507	LPETPVSDAPVATAPHK	[13] Phospho (STY)	5.9986	10.2474	3	VSDAPVATAPHKTMQ	T	513	LPETPVSDAPVATAPHK	[7] Phospho (STY)	82.8083	10.1661	KLPETPVSDAPVATA	S	507	42198.3	39983.9	21044.6	22965.5	13469.5	15232.4	122520	131328	158776	166979	43440.6	46602.1	34489.5	35200.6	45482.5
89	1016.98	2	2031.95	57.6536	0.9071	6.30194	A0A0H3BYP4	Phosphoglucosamine mutase OS=Streptococcus pyogenes serotype M49 (strain NZ131) OX=471876 GN=glmM PE=3	ASAGVMISASHNPALDNGIK	ASAGVMISASHNPALDNGIK	[10] Phospho (STY)	116.05	1.16634	23	99.67	84.9556	AGVMISASHNPALDN	S	100	ASAGVMISASHNPALDNGIK	[10] Phospho (STY)	7.0837	1.20397	16	AGVMISASHNPALDN	S	100	ASAGVMISASHNPALDNGIK	[10] Phospho (STY)	58.1452	1.23002	AGVMISASHNPALDN	S	100	55693.6	55531.9	16358.3	14068.1	17508.4	12966.2	87983.6	77578.4	63618.7	63586.5	30834.4	26770.7	113510	110052	123821
93	475.745	2	949.475	28.7968	1.24762	2.49307	B5XIW7	Chaperonin GroEL OS=Streptococcus pyogenes serotype M49 (strain NZ131) OX=471876 GN=groEL PE=3	AIAQPVSGK	AIAQPVSGK	[7] Phospho (STY)	35.72	12.6667	7	100	100	KAIAQPVSGKEAIAQ	S	138	AIAQPVSGK	[7] Phospho (STY)	8.1603	12.7473	3	KAIAQPVSGKEAIAQ	S	138	AIAQPVSGK	[7] Phospho (STY)	96.7094	12.6171	KAIAQPVSGKEAIAQ	S	138	28122.6	29085.3	23455.4	25046.1	17195.5	17457.3	80016.3	78162.6	110039	131406	29227	28033.8	22621.4	23355.5	45199.9
97	628.276	2	1254.54	26.6762	1.37048	3.1856	A0A0H3BZL9	PTS system, fructose-specific IIABC component OS=Streptococcus pyogenes serotype M49 (strain NZ131) OX=471876 GN=fruA PE=4	VETNGASGVANR	VETNGASGVANR	[4] Deamidation (N)|[7] Phospho (STY)	90.52	10.1	18	100	95.8889	KVETNGASGVANRLT	S	205	VETNGASGVANR	[4] Deamidation (N)|[7] Phospho (STY)	7.2909	10.0812	11	KVETNGASGVANRLT	S	205	VETNGASGVANR	[4] Deamidation (N)|[7] Phospho (STY)	80.6862	10.1422	KVETNGASGVANRLT	S	205	23067.1	24946.8	24309.2	26515.7	18987.2	19838.9	85519.5	83251.5	123315	163783	35440.2	35201.4	24397.5	23818.7	30145.4
107	626.643	3	1876.91	38.4608	3.61475	3.04709	A0A0H3BY55	Non-specific serine/threonine protein kinase OS=Streptococcus pyogenes serotype M49 (strain NZ131) OX=471876 GN=Spy49_1257c PE=4	LDQTNQTDALQPPTKK	LDQTNQTDALQPPTKK	[4] Phospho (STY)	79.76	8.19916	17	99.98	94.4192	QESRLDQTNQTDALQ	T	324	LDQTNQTDALQPPTKK	[4] Phospho (STY)	6.935	8.2399	8	QESRLDQTNQTDALQ	T	324	LDQTNQTDALQPPTKK	[7] Phospho (STY)	58.7783	8.2681	RLDQTNQTDALQPPT	T	327	306442	330098	107247	117844	142195	148428	74945.1	77908.4	36042.8	36511.8	266608	274356	281823	275899	513682
117	583.944	3	1748.81	42.9009	2.90575	2.90859	A0A0H3BY55	Non-specific serine/threonine protein kinase OS=Streptococcus pyogenes serotype M49 (strain NZ131) OX=471876 GN=Spy49_1257c PE=4	LDQTNQTDALQPPTK	LDQTNQTDALQPPTK	[4] Phospho (STY)	95.89	7.19988	25	100	95.5639	QESRLDQTNQTDALQ	T	324	LDQTNQTDALQPPTK	[4] Phospho (STY)	6.1752	7.18642	7	QESRLDQTNQTDALQ	T	324	LDQTNQTDALQPPTK	[7] Phospho (STY)	79.5732	7.21669	RLDQTNQTDALQPPT	T	327	270370	282660	67420.2	74964.4	123415	129810	34388.3	38786.2	29969.5	31429.7	218957	225646	262712	248142	275251
121	678.654	3	2032.94	59.3729	1.97822	3.04709	A0A0H3BYP4	Phosphoglucosamine mutase OS=Streptococcus pyogenes serotype M49 (strain NZ131) OX=471876 GN=glmM PE=3	ASAGVMISASHNPALDNGIK	ASAGVMISASHNPALDNGIK	[10] Phospho (STY)|[17] Deamidation (N)	137.43	4.951	23	99.75	79.0991	AGVMISASHNPALDN	S	100	ASAGVMISASHNPALDNGIK	[10] Phospho (STY)|[17] Deamidation (N)	7.3848	4.98862	23	AGVMISASHNPALDN	S	100	ASAGVMISASHNPALDNGIK	[10] Phospho (STY)|[17] Deamidation (N)	48.7068	5.01466	AGVMISASHNPALDN	S	100	126737	107546	20238.6	20882.8	23362.2	19578.5	124163	126225	139506	150328	62802	54673.8	187856	188282	181330
126	1136.56	1	1135.55	57.4766	0.545883	10.5956	A0A0H3BXI0	Uncharacterized protein OS=Streptococcus pyogenes serotype M49 (strain NZ131) OX=471876 GN=Spy49_1001c PE=3	DIPAIAESIK	DIPAIAESIK	[8] Phospho (STY)	59.25	1.3683	24	100	100	DIPAIAESIKAIVSQ	S	85	DIPAIAESIK	[8] Phospho (STY)	8.6467	1.34758	13	DIPAIAESIKAIVSQ	S	85								3653.85	3720.8	3013.24	2796.79	1490.26	1317.96	22768	23228	71164.4	69044.1	4064.1	4674.79	2624.91	2781.44	4412.54
136	687.308	2	1372.6	67.2217	0.989017	3.60111	A0A0H3C124	Putative mannose-specific phosphotransferase system component IID OS=Streptococcus pyogenes serotype M49 (strain NZ131) OX=471876 GN=manN PE=4	DMSGGILQDITK	DMSGGILQDITK	[2] Oxidation (M)|[3] Phospho (STY)	92.42	5.60744	26	100	100	SEITKDMSGGILQDI	S	174	DMSGGILQDITK	[2] Oxidation (M)|[3] Phospho (STY)	7.9491	5.5903	12	SEITKDMSGGILQDI	S	174	DMSGGILQDITK	[2] Oxidation (M)|[3] Phospho (STY)	85.8626	5.64601	SEITKDMSGGILQDI	S	174	14533.4	14889.9	9877.6	10824.5	7393.18	7858.12	73278.9	72681.6	131133	140230	14153.5	14831	14889.6	15543.4	50873.5
137	905.445	2	1808.87	47.7022	0.627567	4.98615	A0A0H3BZD6	Putative PTS system enzyme II OS=Streptococcus pyogenes serotype M49 (strain NZ131) OX=471876 GN=Spy49_1737c PE=4	LPETPVSDAPVATAPHK	LPETPVSDAPVATAPHK	[7] Phospho (STY)	83.93	2.06522	25	99.43	89.6226	KLPETPVSDAPVATA	S	507	LPETPVSDAPVATAPHK	[7] Phospho (STY)	6.2093	2.1075	2	KLPETPVSDAPVATA	S	507	LPETPVSDAPVATAPHK	[7] Phospho (STY)	60.657	2.0262	KLPETPVSDAPVATA	S	507	11692.2	11942	10160.4	10196.6	5402.47	5288.19	74727.7	68345.4	96157.4	94741.5	18531.5	17896.7	12784.4	13025.8	17253.4
138	643.316	2	1284.62	40.6026	0.750467	3.60111	A0A0H3BZ43	Uncharacterized protein OS=Streptococcus pyogenes serotype M49 (strain NZ131) OX=471876 GN=Spy49_1003c PE=3	NTSKDLTSAIR	NTSKDLTSAIR	[3] Phospho (STY)	65.07	7.50359	20	97.02	79.3314	ETYIKNTSKDLTSAI	S	10	NTSKDLTSAIR	[3] Phospho (STY)	6.728	7.56312	4	ETYIKNTSKDLTSAI	S	10	NTSKDLTSAIR	[3] Phospho (STY)	72.5177	7.44863	ETYIKNTSKDLTSAI	S	10	8930.66	9214.12	7518.11	7720.21	3322.93	3667.46	43858.8	44483.3	44243.2	45990.1	10770.8	10709.8	7895.1	8431.88	22270.5
143	620.782	2	1239.55	27.2831	0.60695	3.39335	B5XK64	Ribosome-recycling factor OS=Streptococcus pyogenes serotype M49 (strain NZ131) OX=471876 GN=frr PE=3	FAQSHQSLSR	FAQSHQSLSR	[7] Phospho (STY)	63.93	7.51369	16	99.69	87.8884	RFAQSHQSLSREYAS	S	19	FAQSHQSLSR	[7] Phospho (STY)	6.5958	7.49471	2	RFAQSHQSLSREYAS	S	19	FAQSHQSLSR	[9] Phospho (STY)	72.0481	7.45674	AQSHQSLSREYASIR	S	21	5518.72	6241.87	5409.37	5768.84	2648.49	2655.33	38037.1	37114.7	52193.8	52794.8	7810.01	7342.42	6586.28	6799.21	34939
144	740.307	2	1478.6	45.0429	0.89385	3.87812	B5XIW7	Chaperonin GroEL OS=Streptococcus pyogenes serotype M49 (strain NZ131) OX=471876 GN=groEL PE=3	SQLETTTSDFDR	SQLETTTSDFDR	[1] Phospho (STY)	79.81	4.21186	26	100	94.239	NRIALIKSQLETTTS	S	349	SQLETTTSDFDR	[1] Phospho (STY)	8.4925	4.19595	21	NRIALIKSQLETTTS	S	349	SQLETTTSDFDR	[1] Phospho (STY)	96.2559	4.18003	NRIALIKSQLETTTS	S	349	9204.99	10260.5	9735.93	9902.76	6067.36	5975.86	55236.2	55745	87492.8	92797.3	12925.4	12858.4	7855.95	7733.5	16965.9
154	646.618	3	1936.83	50.103	0.832517	3.4626	A0A0H3BZL9	PTS system, fructose-specific IIABC component OS=Streptococcus pyogenes serotype M49 (strain NZ131) OX=471876 GN=fruA PE=4	EEQTSTGLGDGIAMPHSK	EEQTSTGLGDGIAMPHSK	[4] Phospho (STY)	78	3.8395	12	93.08	60.0223	IMTREEQTSTGLGDG	T	55	EEQTSTGLGDGIAMPHSK	[5] Phospho (STY)	7.3971	3.87898	4	MTREEQTSTGLGDGI	S	56	EEQTSTGLGDGIAMPHSK	[6] Phospho (STY)	67.649	3.85468	TREEQTSTGLGDGIA	T	57	24448.2	24867.1	12644	13776.7	8544.2	8704.21	76457	81337.3	37547.9	38235.5	33322.3	35645.9	29593.1	28826.2	41723.4
161	915.346	2	1828.68	59.7751	2.56505	4.84765	A0A0H3BZC1	Uncharacterized protein OS=Streptococcus pyogenes serotype M49 (strain NZ131) OX=471876 GN=Spy49_0377 PE=4	METFESDDAVDFDTK	METFESDDAVDFDTK	[14] Phospho (STY)	83.1	1.35397	23	100	99.9548	DDAVDFDTKVMTLPE	T	30					0				METFESDDAVDFDTK	[14] Phospho (STY)	75.3235	1.32823	DDAVDFDTKVMTLPE	T	30	103482	94538.1	71742.5	62621.7	83038.9	82590.6	16547	16886.4	8323.94	8355.74	106161	104189	161248	159884	45849.3
163	711.837	2	1421.66	41.7686	0.771167	3.67036	A0A0H3C2P8	Uncharacterized protein OS=Streptococcus pyogenes serotype M49 (strain NZ131) OX=471876 GN=Spy49_1748c PE=4	KETIELANDGPR	KETIELANDGPR	[3] Phospho (STY)	104.14	3.57726	24	100	100	DEFIRKETIELANDG	T	13					0				KETIELANDGPR	[3] Phospho (STY)	88.8935	3.59794	DEFIRKETIELANDG	T	13	36101.2	41001.5	20458.2	21929.8	25101.9	24677.3	11360.5	11046.9	6579.94	13552.4	34239.2	34288	42102	39837	44338
164	537.752	2	1073.49	49.7211	1.0504	2.77008	B5XLJ8	L-lactate dehydrogenase OS=Streptococcus pyogenes serotype M49 (strain NZ131) OX=471876 GN=ldh PE=3	DAAYSIINK	DAAYSIINK	[5] Phospho (STY)	44.27	9.28255	17	100	99.9287	SVRDAAYSIINKKGA	S	225					0				DAAYSIINK	[5] Phospho (STY)	95.3907	9.2387	SVRDAAYSIINKKGA	S	225	6933.46	7559.9	6457.36	7109.11	5039.38	5185.75	40203.5	42627.2	79593.7	78492.9	10788.1	11799.8	9553.1	8514.23	21223.4
173	502.712	2	1003.41	39.6341	1.26835	2.63158	B5XJ02	UPF0297 protein Spy49_1751c OS=Streptococcus pyogenes serotype M49 (strain NZ131) OX=471876 GN=Spy49_1751c PE=3 M	GFTDETVR	GFTDETVR	[3] Phospho (STY)	52.02	8.48965	23	99.93	99.0792	----MGFTDETVRFK	T	4					0											23451.9	23316.4	23159.6	24352.5	18313.9	20160.9	12598.8	12799.2	14397.5	14760.5	28483.6	28442.4	27021.8	26435.4	19316
176	1024.98	2	2047.94	52.7906	1.0299	5.88643	A0A0H3BYP4	Phosphoglucosamine mutase OS=Streptococcus pyogenes serotype M49 (strain NZ131) OX=471876 GN=glmM PE=3	ASAGVMISASHNPALDNGIK	ASAGVMISASHNPALDNGIK	[6] Oxidation (M)|[10] Phospho (STY)	143.05	1.40211	26	99.82	84.9404	AGVMISASHNPALDN	S	100					0				ASAGVMISASHNPALDNGIK	[6] Oxidation (M)|[10] Phospho (STY)	65.156	1.36764	AGVMISASHNPALDN	S	100	41389.2	43675	11922.4	10909.3	12588.6	9841.98	58276.9	48714.6	57160.5	56667.8	28108.1	25050.1	88787.4	85151.8	88256.9
181	1004.41	1	1003.4	37.1107	0.5867	8.65651	B5XJ02	UPF0297 protein Spy49_1751c OS=Streptococcus pyogenes serotype M49 (strain NZ131) OX=471876 GN=Spy49_1751c PE=3 M	GFTDETVR	GFTDETVR	[6] Phospho (STY)	46.8	1.78257	19	99.95	96.3552	-MGFTDETVRFKLDD	T	7					0											12507.4	13992.7	12878.6	13761.1	10391.4	12092.8	1629.73	1556.3	1244.21	986.374	24432.8	28917	9680.12	11790.9	24750.7
182	683.985	3	2048.93	54.4686	2.27795	2.97784	A0A0H3BYP4	Phosphoglucosamine mutase OS=Streptococcus pyogenes serotype M49 (strain NZ131) OX=471876 GN=glmM PE=3	ASAGVMISASHNPALDNGIK	ASAGVMISASHNPALDNGIK	[6] Oxidation (M)|[10] Phospho (STY)|[17] Deamidation (N)	117.98	4.77534	16	99.65	76.2203	AGVMISASHNPALDN	S	100					0				ASAGVMISASHNPALDNGIK	[6] Oxidation (M)|[10] Phospho (STY)|[17] Deamidation (N)	55.3841	4.74088	AGVMISASHNPALDN	S	100	109063	108342	19396.7	20109.5	22620	23307.1	93432.4	88300	109373	113628	67834	62264.9	193217	185623	150723
187	1366.61	3	4096.82	61.9915	1.95683	6.02493	A0A0H3BZ18	Cell-division initiation protein OS=Streptococcus pyogenes serotype M49 (strain NZ131) OX=471876 GN=divIVA PE=4	RVDESNKELEAYQLDSQSDSTTEPEVNLSETQTFK	RVDESNKELEAYQLDSQSDSTTEPEVNLSETQTFK	[31] Phospho (STY)	170.72	-2.09895	10	37.3	33.4464	PEVNLSETQTFKLNI	T	245	RVDESNKELEAYQLDSQSDSTTEPEVNLSETQTFK	[31] Phospho (STY)	8.0676	-2.08029	18	PEVNLSETQTFKLNI	T	245	RVDESNKELEAYQLDSQSDSTTEPEVNLSETQTFK	[31] Phospho (STY)	45.4837	-2.07311	PEVNLSETQTFKLNI	T	245	11399.7	8086.52	59062.2	45846.9	33570.6	16531.8	18209.1	11573.2	2399.33	2109.95	37736.3	14411.3	155781	136669	207422
188	620.781	2	1239.55	58.2402	0.988867	3.3241	B5XHZ0	Chaperone protein DnaK OS=Streptococcus pyogenes serotype M49 (strain NZ131) OX=471876 GN=dnaK PE=3	DAAQSALDELK	DAAQSALDELK	[5] Phospho (STY)	81.04	6.5608	22	100	100	TERDAAQSALDELKA	S	537	DAAQSALDELK	[5] Phospho (STY)	8.2853	6.54181	10	TERDAAQSALDELKA	S	537	DAAQSALDELK	[5] Phospho (STY)	81.3753	6.52283	TERDAAQSALDELKA	S	537	6684.61	6646.09	5945.2	6033.48	2865.48	3254.85	45751.9	47793.5	86513.9	91298.1	8535.81	9152.56	5773.58	6449.28	40579.6
195	874.44	3	2620.3	59.7955	0.463883	4.29363	A0A0H3BXH0	Endolytic murein transglycosylase OS=Streptococcus pyogenes serotype M49 (strain NZ131) OX=471876 GN=mltG PE=3	VVQANELQETASKESQVPLTIEK	VVQANELQETASKESQVPLTIEK	[12] Phospho (STY)	48.37	-0.784992	7	70.08	54.2471	NELQETASKESQVPL	S	124	VVQANELQETASKESQVPLTIEK	[10] Phospho (STY)	6.4652	-0.75581	15	QANELQETASKESQV	T	122	VVQANELQETASKESQVPLTIEK	[12] Phospho (STY)	38.871	-0.773772	NELQETASKESQVPL	S	124	21928.7	20706.4	11030.3	10100	6803.48	7502.77	14706.3	15563.7	8432.79	9178.42	16896.6	17506.4	20411.3	21202.9	19877
207	742.865	2	1483.71	35.4941	0.504733	3.94737	B5XKI2	Triosephosphate isomerase OS=Streptococcus pyogenes serotype M49 (strain NZ131) OX=471876 GN=tpiA PE=3	VQYGGSVKPENVK	VQYGGSVKPENVK	[6] Phospho (STY)	71.04	5.15649	15	100	99.9628	VRVQYGGSVKPENVK	S	214	VQYGGSVKPENVK	[6] Phospho (STY)	8.322	5.14063	13	VRVQYGGSVKPENVK	S	214	VQYGGSVKPENVK	[6] Phospho (STY)	80.2416	5.2437	VRVQYGGSVKPENVK	S	214	3698.93	4653.45	3203.36	3678.93	1717.54	1620.32	19442.3	17748.3	21387.4	18870.4	6702.12	6724.32	14993.7	16012.2	74779.1
208	693.839	2	1385.66	64.1122	0.661017	3.94737	B5XMJ7	Cell cycle protein GpsB OS=Streptococcus pyogenes serotype M49 (strain NZ131) OX=471876 GN=gpsB PE=3	VAQSATNFDILK	VAQSATNFDILK	[6] Phospho (STY)	78.01	2.51828	18	99.85	95.9465	TRVAQSATNFDILKR	T	86	VAQSATNFDILK	[6] Phospho (STY)	7.0411	2.57346	15	TRVAQSATNFDILKR	T	86	VAQSATNFDILK	[6] Phospho (STY)	69.7371	2.48431	TRVAQSATNFDILKR	T	86	31732.1	32871	18798.9	17462.7	20180.9	22426.8	10967.1	12191	8402.35	8678.87	33056.8	34686.3	43862.8	45595.6	26450.6
222	601.798	2	1201.58	45.4248	0.648033	3.25485	B5XLJ8	L-lactate dehydrogenase OS=Streptococcus pyogenes serotype M49 (strain NZ131) OX=471876 GN=ldh PE=3	DAAYSIINKK	DAAYSIINKK	[5] Phospho (STY)	55.16	5.83009	14	100	99.9519	SVRDAAYSIINKKGA	S	225	DAAYSIINKK	[5] Phospho (STY)	7.9244	5.81051	10	SVRDAAYSIINKKGA	S	225	DAAYSIINKK	[5] Phospho (STY)	58.7002	5.79092	SVRDAAYSIINKKGA	S	225	6132.74	6930.39	4917.48	5431.57	2626.72	2644.77	33466	33987.8	46774	52385.8	7323.38	7182.02	5912.84	5765.9	25993.9
223	751.351	2	1500.69	59.3729	1.6989	3.94737	A0A0H3BXR4	Ribonucleoside-diphosphate reductase OS=Streptococcus pyogenes serotype M49 (strain NZ131) OX=471876 GN=nrdE1 PE=3	YQPATPSFLNAGR	YQPATPSFLNAGR	[5] Phospho (STY)	39.68	7.18615	3	99.48	97.432	NQRYQPATPSFLNAG	T	155					0				YQPATPSFLNAGR	[5] Phospho (STY)	83.329	7.15478	NQRYQPATPSFLNAG	T	155	4186.89	3574.51	2661.75	2841.82	1553.07	1624.45	4146.97	3728.77	8397.62	8626.71	8658.14	8296.56	42800.3	44672.8	217932
225	939.454	2	1876.89	38.4608	2.26463	5.54017	A0A0H3BY55	Non-specific serine/threonine protein kinase OS=Streptococcus pyogenes serotype M49 (strain NZ131) OX=471876 GN=Spy49_1257c PE=4	LDQTNQTDALQPPTKK	LDQTNQTDALQPPTKK	[4] Phospho (STY)	78.06	0.165112	16	99.98	93.7814	QESRLDQTNQTDALQ	T	324	LDQTNQTDALQPPTKK	[4] Phospho (STY)	6.935	0.205853	10	QESRLDQTNQTDALQ	T	324								51024.5	66140.4	25432.4	26259.3	37569.9	37827.4	13240.5	11882.7	4662.94	4805.44	60325.2	57941.8	55190	59025.9	194222
231	831.343	2	1660.67	36.1013	0.5047	4.57064	B5XJX2	UPF0154 protein Spy49_0296 OS=Streptococcus pyogenes serotype M49 (strain NZ131) OX=471876 GN=Spy49_0296 PE=3	EMMSQMGQKPSEAK	EMMSQMGQKPSEAK	[11] Phospho (STY)	55.96	3.4773	11	99.98	99.3945	SQMGQKPSEAKIQQT	S	56	EMMSQMGQKPSEAK	[11] Phospho (STY)	6.2482	3.46313	2	SQMGQKPSEAKIQQT	S	56	EMMSQMGQKPSEAK	[11] Phospho (STY)	72.4931	3.49501	SQMGQKPSEAKIQQT	S	56	2442.69	2341.98	3005.35	2957.01	870.876	1067.67	55023.6	53859	50970.1	50186.5	3637.28	4345.96	1854.52	2366.8	7913.82
232	651.019	3	1950.03	44.9815	0.504783	3.67036	B5XM21	Uridine kinase OS=Streptococcus pyogenes serotype M49 (strain NZ131) OX=471876 GN=udk PE=3	KPIIIGVTGGSGGGKTSVSR	KPIIIGVTGGSGGGKTSVSR	[16] Phospho (STY)	84.04	2.27728	13	93.49	82.0347	GGSGGGKTSVSRAIL	T	19					0				KPIIIGVTGGSGGGKTSVSR	[16] Phospho (STY)	47.7259	2.24108	GGSGGGKTSVSRAIL	T	19	19514.3	21382.9	5431.15	6065.04	3088.91	3003.01	10079.9	10235.4	2353.25	2508.4	6452.56	6320.24	17940.6	17610.7	36173.8
233	569.279	3	1704.81	40.8	0.6278	2.77008	A0A0H3BYA0	PTS system, IIB component, putative OS=Streptococcus pyogenes serotype M49 (strain NZ131) OX=471876 GN=Spy49_1328c PE=4	ILAACGAGVNSSHQIK	ILAACGAGVNSSHQIK	[5] Carbamidomethyl (C)|[11] Phospho (STY)	106.9	7.4265	11	96.89	86.6131	ACGAGVNSSHQIKDA	S	14					0				ILAACGAGVNSSHQIK	[5] Carbamidomethyl (C)|[11] Phospho (STY)	70.1158	7.5024	ACGAGVNSSHQIKDA	S	14	19601.7	21100.1	8839.38	9417.4	9811.92	9906.42	50180.3	49404.6	49915.1	47074.9	16783.3	18027.7	11581.2	11341.2	8918.54
254	495.582	3	1483.72	35.4941	0.484233	2.77008	B5XKI2	Triosephosphate isomerase OS=Streptococcus pyogenes serotype M49 (strain NZ131) OX=471876 GN=tpiA PE=3	VQYGGSVKPENVK	VQYGGSVKPENVK	[6] Phospho (STY)	63.85	10.4333	9	100	99.946	VRVQYGGSVKPENVK	S	214	VQYGGSVKPENVK	[6] Phospho (STY)	8.322	10.4175	10	VRVQYGGSVKPENVK	S	214	VQYGGSVKPENVK	[6] Phospho (STY)	62.7569	10.5205	VRVQYGGSVKPENVK	S	214	6305.01	6498.59	2280.31	2879.59	1556.94	1307.9	13533.9	15147.9	14347	15170.8	7627.61	7998.32	15807.8	16152.1	66983.4
255	943.424	2	1884.83	59.2088	0.45075	5.26316	B5XJR1	Elongation factor G OS=Streptococcus pyogenes serotype M49 (strain NZ131) OX=471876 GN=fusA PE=3	VYSGVLNSGSYVMNTSK	VYSGVLNSGSYVMNTSK	[10] Phospho (STY)	75.33	0.0283437	10	99.37	82.3427	SGVLNSGSYVMNTSK	S	338	VYSGVLNSGSYVMNTSK	[10] Phospho (STY)	8.2164	0.0689132	13	SGVLNSGSYVMNTSK	S	338	VYSGVLNSGSYVMNTSK	[10] Phospho (STY)	66.0803	0.0564277	SGVLNSGSYVMNTSK	S	338	2361.89	2188.61	1872.53	1655.03	922.037	890.999	11155.3	11220	21883.5	25894.8	3278.8	3144.03	4858.03	5535.09	27200.6
260	685.325	2	1368.64	37.2466	0.866033	3.67036	A0A0H3BZ18	Cell-division initiation protein OS=Streptococcus pyogenes serotype M49 (strain NZ131) OX=471876 GN=divIVA PE=4	ATANAEATNLVSK	ATANAEATNLVSK	[12] Phospho (STY)	96.76	5.28821	26	100	99.1697	AEATNLVSKATYDAQ	S	94	ATANAEATNLVSK	[12] Phospho (STY)	7.5581	5.27102	18	AEATNLVSKATYDAQ	S	94	ATANAEATNLVSK	[12] Phospho (STY)	87.5324	5.25382	AEATNLVSKATYDAQ	S	94	4056.38	4320.12	6429.7	6730.14	4126.4	4328.67	61828.6	65323.3	66080.3	64928.1	9015.14	9017.16	7455.16	7618.17	26668.2
262	532.266	2	1062.52	35.1738	0.812	2.83934	B5XKI1	Elongation factor Tu OS=Streptococcus pyogenes serotype M49 (strain NZ131) OX=471876 GN=tuf PE=3	LPTSVNQPK	LPTSVNQPK	[4] Phospho (STY)	47.91	6.45598	18	94.58	87.5929	LARRLPTSVNQPKDY	S	43	LPTSVNQPK	[4] Phospho (STY)	7.0528	6.52795	3	LARRLPTSVNQPKDY	S	43	LPTSVNQPK	[4] Phospho (STY)	58.5407	6.5058	LARRLPTSVNQPKDY	S	43	6601.67	7044.29	6088.88	6411.65	4220.29	4273.09	32931.8	34900.4	49925.3	51103	9196.94	9475.4	7977.14	7900.31	22866.9
263	791.892	2	1581.77	64.8011	0.668383	4.29363	A0A0H3BYB3	APH domain-containing protein OS=Streptococcus pyogenes serotype M49 (strain NZ131) OX=471876 GN=Spy49_1343c PE=4	TTTEQELTLTPLR	TTTEQELTLTPLR	[2] Phospho (STY)	99.74	2.90214	15	49.93	49.6382	-----MTTTEQELTL	T	3					0				TTTEQELTLTPLR	[2] Phospho (STY)	89.1936	2.93561	-----MTTTEQELTL	T	3	23551.2	23895	16617.8	17642.5	11124	11137.8	15189.6	15491.3	16742.2	18747.6	25298.2	26391	31943.1	31726.2	31115.5
269	660.834	2	1319.65	74.3209	0.988933	3.60111	A0A0H3BZD9	Protein GrpE OS=Streptococcus pyogenes serotype M49 (strain NZ131) OX=471876 GN=grpE PE=3	AILPSLDNLER	AILPSLDNLER	[5] Phospho (STY)	62.67	3.3956	11	100	100	LAKAILPSLDNLERA	S	99	AILPSLDNLER	[5] Phospho (STY)	6.7822	3.37777	4	LAKAILPSLDNLERA	S	99	AILPSLDNLER	[5] Phospho (STY)	60.9183	3.35994	LAKAILPSLDNLERA	S	99	2277.73	2170.78	1418.85	1377.87	730.917	735.018	53053.6	53680.3	90091.3	98128.7	1375.62	1322.25	2498.64	2694.36	40075.4
274	665.812	2	1329.61	54.3662	1.39872	3.39335	B5XJM0	Glucose-6-phosphate isomerase OS=Streptococcus pyogenes serotype M49 (strain NZ131) OX=471876 GN=pgi PE=3	SGTTTEPAIAFR	SGTTTEPAIAFR	[4] Phospho (STY)	58.87	9.84358	11	96.02	75.1115	VISKSGTTTEPAIAF	T	149	SGTTTEPAIAFR	[1] Phospho (STY)	7.0165	9.90109	3	SVNVISKSGTTTEPA	S	146	SGTTTEPAIAFR	[1] Phospho (STY)	88.2736	9.80818	SVNVISKSGTTTEPA	S	146	6360.72	6460.59	5694.1	5890.88	2751.77	3103.39	16699.7	16401.7	25504.5	27206.4	11271.2	11690.4	22255.5	22874.3	194960
278	452.705	2	903.395	33.1958	1.12485	2.35457	A0A0H3BZJ0	Formate acetyltransferase OS=Streptococcus pyogenes serotype M49 (strain NZ131) OX=471876 GN=pfl PE=3	AYTSNIR	AYTSNIR	[4] Phospho (STY)	43.21	11.2159	18	94.08	85.2532	GIFRAYTSNIRRARH	S	155					0				AYTSNIR	[4] Phospho (STY)	92.4972	11.2745	GIFRAYTSNIRRARH	S	155	5354.52	6279.91	5451.71	5625.7	4224.04	4320.24	39103.5	42810.5	86255.4	85092.8	7212.58	7063.81	7925.46	7525.72	10739.3
279	671.783	2	1341.55	44.4153	0.907083	3.60111	B5XJ60	30S ribosomal protein S13 OS=Streptococcus pyogenes serotype M49 (strain NZ131) OX=471876 GN=rpsM PE=3	DLTSDQEDAIR	DLTSDQEDAIR	[4] Phospho (STY)	80	4.39804	18	98.68	92.07	IRVKDLTSDQEDAIR	S	50	DLTSDQEDAIR	[4] Phospho (STY)	7.7247	4.3805	11	IRVKDLTSDQEDAIR	S	50	DLTSDQEDAIR	[3] Phospho (STY)	83.7449	4.4375	DIRVKDLTSDQEDAI	T	49	4752.5	4940.55	4697.13	4863.26	3216.25	3258.55	28116.6	29635.7	46590.8	48502.6	6645.94	6736.96	8091.88	8040.15	29001.1
281	986.188	4	3940.72	64.6168	1.34988	4.70914	A0A0H3BZ18	Cell-division initiation protein OS=Streptococcus pyogenes serotype M49 (strain NZ131) OX=471876 GN=divIVA PE=4	VDESNKELEAYQLDSQSDSTTEPEVNLSETQTFK	VDESNKELEAYQLDSQSDSTTEPEVNLSETQTFK	[30] Phospho (STY)	176.83	-0.396188	7	46.79	36.7243	PEVNLSETQTFKLNI	T	245	VDESNKELEAYQLDSQSDSTTEPEVNLSETQTFK	[30] Phospho (STY)	8.4182	-0.376784	16	PEVNLSETQTFKLNI	T	245	VDESNKELEAYQLDSQSDSTTEPEVNLSETQTFK	[30] Phospho (STY)	53.8852	-0.445451	PEVNLSETQTFKLNI	T	245	33492	28265.7	21874	13171	24632.6	19264	4821.86	7132.96	2057.74	2126.49	48097.5	46395.1	121400	122331	78717.9
291	824.904	2	1647.79	77.3083	0.7635	4.70914	A0A0H3BZ23	Cell division protein FtsZ OS=Streptococcus pyogenes serotype M49 (strain NZ131) OX=471876 GN=ftsZ PE=3	AFSFDTASIQGAIIK	AFSFDTASIQGAIIK	[6] Phospho (STY)	95.96	1.40579	22	99.91	93.0254	-MAFSFDTASIQGAI	T	7	AFSFDTASIQGAIIK	[6] Phospho (STY)	8.2174	1.39151	18	-MAFSFDTASIQGAI	T	7	AFSFDTASIQGAIIK	[6] Phospho (STY)	81.8762	1.43791	-MAFSFDTASIQGAI	T	7	33316	29110.7	9018.05	8526.01	19201.8	17187.5	11885.3	12002.4	10500.8	10721.5	21388	18850.5	37220.6	36423.3	49066.3
294	636.958	3	1907.85	50.8332	0.648267	2.70083	A0A0H3C0G3	Uncharacterized protein OS=Streptococcus pyogenes serotype M49 (strain NZ131) OX=471876 GN=Spy49_1599c PE=4	AGSHPQTSQINVGEFEK	AGSHPQTSQINVGEFEK	[7] Phospho (STY)	63.67	6.03099	4	74.75	54.0635	KAGSHPQTSQINVGE	T	67	AGSHPQTSQINVGEFEK	[8] Phospho (STY)	7.4006	6.07107	14	AGSHPQTSQINVGEF	S	68	AGSHPQTSQINVGEFEK	[8] Phospho (STY)	85.0949	6.09881	AGSHPQTSQINVGEF	S	68	15631.1	14727.8	5631.28	6387.65	2998.78	3929.93	69147.4	70488.4	62535.3	59750.4	15994.5	16141.1	15078.7	14153.5	18763.4
298	530.725	2	1059.44	32.2479	1.32973	2.83934	A0A0H3C124	Putative mannose-specific phosphotransferase system component IID OS=Streptococcus pyogenes serotype M49 (strain NZ131) OX=471876 GN=manN PE=4	LYTSPEDR	LYTSPEDR	[4] Phospho (STY)	50.6	7.44852	19	95	81.8004	ALKKLYTSPEDRATA	S	50					0				LYTSPEDR	[4] Phospho (STY)	93.6655	7.4041	ALKKLYTSPEDRATA	S	50	3880.54	4299.28	3884.84	4260.33	2849.31	2806.79	27785.8	28302.6	64982.7	65525.9	5849.71	5918.9	4156.32	4368.93	22575.7
302	724.765	2	1447.52	26.2945	1.39835	3.67036	B5XKI2	Triosephosphate isomerase OS=Streptococcus pyogenes serotype M49 (strain NZ131) OX=471876 GN=tpiA PE=3	SATQDDAQNMCK	SATQDDAQNMCK	[1] Phospho (STY)|[11] Carbamidomethyl (C)	93.95	3.40538	7	50	50	WAIGTGKSATQDDAQ	S	178	SATQDDAQNMCK	[1] Phospho (STY)|[11] Carbamidomethyl (C)	8.3162	3.38913	19	WAIGTGKSATQDDAQ	S	178	SATQDDAQNMCK	[3] Phospho (STY)|[11] Carbamidomethyl (C)	67.5904	3.44195	IGTGKSATQDDAQNM	T	180	2677.24	2924.33	3180.03	3403.41	2212.22	2144.17	26755.9	25180.6	28739.8	36809.5	4851.35	4759.79	6634.54	6548.44	47556.7
304	628.272	2	1254.53	29.1582	1.45247	3.1856	A0A0H3BZL9	PTS system, fructose-specific IIABC component OS=Streptococcus pyogenes serotype M49 (strain NZ131) OX=471876 GN=fruA PE=4	VETNGASGVANR	VETNGASGVANR	[4] Deamidation (N)|[7] Phospho (STY)	92.93	4.43116	25	100	99.5776	KVETNGASGVANRLT	S	205	VETNGASGVANR	[4] Deamidation (N)|[7] Phospho (STY)	7.0792	4.4124	12	KVETNGASGVANRLT	S	205	VETNGASGVANR	[4] Deamidation (N)|[7] Phospho (STY)	87.0128	4.47335	KVETNGASGVANRLT	S	205	7948.61	9219.55	9893	10072.6	5803.58	6282.32	31909.5	32708	44722.9	46299.9	16025.6	16194.4	14910.8	15997.9	14803.4
315	651.977	3	1952.91	54.4686	0.525367	2.90859	A0A0H3C2S7	Uncharacterized protein OS=Streptococcus pyogenes serotype M49 (strain NZ131) OX=471876 GN=Spy49_1801c PE=4	LLSHQSMGYGQPLEVSK					0						LLSHQSMGYGQPLEVSK	[3] Phospho (STY)	6.7184	1.9596	7	RLQEKLLSHQSMGYG	S	107	LLSHQSMGYGQPLEVSK	[6] Phospho (STY)	86.3583	1.9355	EKLLSHQSMGYGQPL	S	110	19412.1	20940.3	4453.13	5506.48	7291.15	8812.03	7300.09	7083.31	4651.85	2383.46	14173.9	13524.8	27200.5	25803.6	22643.6
326	1152.52	2	2303.02	63.2054	1.87492	6.57895	A0A0H3BYW2	EIICB-Lac OS=Streptococcus pyogenes serotype M49 (strain NZ131) OX=471876 GN=lacE PE=4	VYDEQILAEEAAGTNSSDALK	VYDEQILAEEAAGTNSSDALK	[17] Phospho (STY)	131.49	0.401141	10	89.92	51.7436	EAAGTNSSDALKEKV	S	428	VYDEQILAEEAAGTNSSDALK	[17] Phospho (STY)	7.3722	0.390922	7	EAAGTNSSDALKEKV	S	428	VYDEQILAEEAAGTNSSDALK	[17] Phospho (STY)	71.9181	0.413907	EAAGTNSSDALKEKV	S	428	6757.26	6080.74	6212.32	4902.89	3338.84	2987.23	128384	122211	163899	158120	7948.89	7057.32	6267.07	6380.01	3238.37
327	793.7	3	2378.08	43.3238	0.791483	3.67036	B5XI23	Protein translocase subunit SecA OS=Streptococcus pyogenes serotype M49 (strain NZ131) OX=471876 GN=secA PE=3	ATTAAPQNIQSQQSANTDDLPK	ATTAAPQNIQSQQSANTDDLPK	[17] Phospho (STY)	67.94	0.93496	13	99.4	84.4238	QSQQSANTDDLPKVE	T	809	ATTAAPQNIQSQQSANTDDLPK	[17] Phospho (STY)	7.6441	0.925064	20	QSQQSANTDDLPKVE	T	809	ATTAAPQNIQSQQSANTDDLPK	[17] Phospho (STY)	12.978	0.905273	QSQQSANTDDLPKVE	T	809	41851.3	42981.7	13245	14218.5	17486.4	17713.7	8859.42	9822.82	3049.1	3102.6	32447.2	34425.2	46890.3	47028.4	30103.6
334	491.739	2	981.464	28.6125	1.62932	2.70083	A0A0H3C1S0	CsbD domain-containing protein OS=Streptococcus pyogenes serotype M49 (strain NZ131) OX=471876 GN=Spy49_1665c PE=3	IEQASGGLK	IEQASGGLK	[5] Phospho (STY)	56.38	10.855	19	100	100	KSKIEQASGGLKEGA	S	14	IEQASGGLK	[5] Phospho (STY)	7.6677	10.831	4	KSKIEQASGGLKEGA	S	14	IEQASGGLK	[5] Phospho (STY)	90.8778	10.8071	KSKIEQASGGLKEGA	S	14	8200.63	9292.79	8819.56	9826.52	7147.2	7485.86	22267.3	24132.7	26024.1	32411.2	14894.2	14766.3	13782.9	13798.1	24586.2
336	634.964	3	1901.87	48.7323	0.709567	2.90859	B5XKG9	Lysine--tRNA ligase OS=Streptococcus pyogenes serotype M49 (strain NZ131) OX=471876 GN=lysS PE=3	SNQHIEELNDQQIVR	SNQHIEELNDQQIVR	[1] Phospho (STY)	104.93	3.28948	24	100	100	------MSNQHIEEL	S	2	SNQHIEELNDQQIVR	[1] Phospho (STY)	7.2231	3.2771	25	------MSNQHIEEL	S	2	SNQHIEELNDQQIVR	[1] Phospho (STY)	88.961	3.25235	------MSNQHIEEL	S	2	27838.8	26255.6	12374.8	12950.9	9516.28	10584	31533.5	32647.6	15698.4	15940.5	15218.8	15340.4	15715.3	15433.5	9390.34
338	569.277	3	1704.81	41.3662	0.681717	3.04709	A0A0H3BYA0	PTS system, IIB component, putative OS=Streptococcus pyogenes serotype M49 (strain NZ131) OX=471876 GN=Spy49_1328c PE=4	ILAACGAGVNSSHQIK	ILAACGAGVNSSHQIK	[5] Carbamidomethyl (C)|[12] Phospho (STY)	64.11	4.2608	5	92.8	67.19	CGAGVNSSHQIKDAI	S	15	ILAACGAGVNSSHQIK	[5] Carbamidomethyl (C)|[12] Phospho (STY)	7.4677	4.24699	3	CGAGVNSSHQIKDAI	S	15								13999.1	14710.1	4538.89	5856.09	5423.61	5375.65	49485.8	51554.8	42349.2	42292.4	10081.7	11066.9	6477.26	6378.45	9018.91
344	901.945	2	1801.87	41.4686	0.627667	4.77839	B5XMJ7	Cell cycle protein GpsB OS=Streptococcus pyogenes serotype M49 (strain NZ131) OX=471876 GN=gpsB PE=3	NTVSATVQQPVPQPTR	NTVSATVQQPVPQPTR	[6] Phospho (STY)	99.39	1.23398	16	99.91	79.6171	ARNTVSATVQQPVPQ	T	70	NTVSATVQQPVPQPTR	[6] Phospho (STY)	7.2898	1.27642	13	ARNTVSATVQQPVPQ	T	70	NTVSATVQQPVPQPTR	[6] Phospho (STY)	86.9098	1.20786	ARNTVSATVQQPVPQ	T	70	6224	6938.21	2005.43	1911.57	3118.45	3251.98	3071.85	3052.72	3514.99	3195.85	7375.84	7485.87	19099.7	19756.1	83039.1
358	599.3	2	1196.59	27.8827	0.463617	3.11634	A0A0H3C1S0	CsbD domain-containing protein OS=Streptococcus pyogenes serotype M49 (strain NZ131) OX=471876 GN=Spy49_1665c PE=3	SKIEQASGGLK	SKIEQASGGLK	[7] Phospho (STY)	55.51	4.83157	22	100	99.4867	KSKIEQASGGLKEGA	S	14	SKIEQASGGLK	[7] Phospho (STY)	7.2601	4.8119	10	KSKIEQASGGLKEGA	S	14	SKIEQASGGLK	[7] Phospho (STY)	84.2794	4.79224	KSKIEQASGGLKEGA	S	14	3062.2	3571.34	3388	3594.69	1536.17	1618.92	16598.6	16575.7	15020	15244.2	6267.48	6178.38	5201.12	5468.4	19047.4
360	662.6	3	1984.78	55.3143	1.15298	2.83934	A0A0H3BZC1	Uncharacterized protein OS=Streptococcus pyogenes serotype M49 (strain NZ131) OX=471876 GN=Spy49_0377 PE=4	RMETFESDDAVDFDTK	RMETFESDDAVDFDTK	[15] Phospho (STY)	86.62	1.46101	15	100	99.9406	DDAVDFDTKVMTLPE	T	30					0				RMETFESDDAVDFDTK	[15] Phospho (STY)	87.6955	1.52621	DDAVDFDTKVMTLPE	T	30	47264.6	35644.3	14312.5	13939.3	14799.7	16644.4	2918.32	3265.16	807.5	1026.47	23709.1	21156.6	50159.9	46123.8	14963
364	1152.52	2	2303.02	62.4961	0.729817	6.6482	A0A0H3BYW2	EIICB-Lac OS=Streptococcus pyogenes serotype M49 (strain NZ131) OX=471876 GN=lacE PE=4	VYDEQILAEEAAGTNSSDALK	VYDEQILAEEAAGTNSSDALK	[16] Phospho (STY)	89.03	0.464545	3	46.06	39.89	EEAAGTNSSDALKEK	S	427	VYDEQILAEEAAGTNSSDALK	[16] Phospho (STY)	7.3549	0.454327	8	EEAAGTNSSDALKEK	S	427	VYDEQILAEEAAGTNSSDALK	[16] Phospho (STY)	70.9256	0.477311	EEAAGTNSSDALKEK	S	427	3441.62	2790.62	2887.42	2563.91	1705.71	1636.55	66955.9	58773.9	85383.5	85490.9	4699.63	3873.58	3048.92	3255.51	1613.81
368	454.24	2	906.465	40.3772	0.763583	2.21607	A0A0H3BZC7	EIIAB-Man OS=Streptococcus pyogenes serotype M49 (strain NZ131) OX=471876 GN=manL PE=4	ANVVPISK	ANVVPISK	[7] Phospho (STY)	41.79	8.31647	25	100	100	KANVVPISKLIEASK	S	230					0				ANVVPISK	[7] Phospho (STY)	74.4421	8.26455	KANVVPISKLIEASK	S	230	6261.12	6093.9	4389.78	4985.47	4853.35	4703.61	21547.7	21616.2	25591.2	24762.6	5537.92	6351.56	5612.94	5709.57	21714.7
369	672.802	2	1343.59	26.5943	0.599583	3.53186	A0A0H3BZR7	Mid-cell-anchored protein Z OS=Streptococcus pyogenes serotype M49 (strain NZ131) OX=471876 GN=mapZ PE=3	SEESKEVEVTK	SEESKEVEVTK	[1] Phospho (STY)	90.36	3.3829	21	99.97	94.2904	------MSEESKEVE	S	2					0											10460.6	11165.2	9055.13	8792.92	8728.88	10225.7	15390.8	15212.3	5420.08	7802.64	10239.9	10921.9	8127.12	9259.03	9200.3
377	470.224	2	938.433	40.2543	1.05038	2.42382	B5XK64	Ribosome-recycling factor OS=Streptococcus pyogenes serotype M49 (strain NZ131) OX=471876 GN=frr PE=3	ANASLLDR	ANASLLDR	[4] Phospho (STY)	55	11.2296	25	100	100	RAGRANASLLDRIQV	S	35					0				ANASLLDR	[4] Phospho (STY)	78.1719	11.1795	RAGRANASLLDRIQV	S	35	4050.5	4241.98	3817.84	3950.74	2416.53	2620.84	20507.2	21553.6	37957.4	38642.4	5833.58	5808.92	5148.02	5028.74	18085.5
379	498.745	2	995.475	26.5943	0.783883	2.49307	A0A0H3BY55	Non-specific serine/threonine protein kinase OS=Streptococcus pyogenes serotype M49 (strain NZ131) OX=471876 GN=Spy49_1257c PE=4	VASGPTASVK	VASGPTASVK	[6] Phospho (STY)	71.65	6.33964	10	99.49	92.2433	PKVASGPTASVKLSP	T	302	VASGPTASVK	[6] Phospho (STY)	5.8204	6.41645	7	PKVASGPTASVKLSP	T	302	VASGPTASVK	[6] Phospho (STY)	69.9684	6.39281	PKVASGPTASVKLSP	T	302	12013.9	12954.6	3597.83	3747.88	7243.71	8314.19	3491.37	3834.51	1348.23	1839.97	8194.84	8771.87	13287.2	14398	47212.1
382	1017.47	2	2032.93	59.3729	1.39157	6.02493	A0A0H3BYP4	Phosphoglucosamine mutase OS=Streptococcus pyogenes serotype M49 (strain NZ131) OX=471876 GN=glmM PE=3	ASAGVMISASHNPALDNGIK	ASAGVMISASHNPALDNGIK	[10] Phospho (STY)|[17] Deamidation (N)	137.43	0.498108	23	99.75	79.4432	AGVMISASHNPALDN	S	100	ASAGVMISASHNPALDNGIK	[10] Phospho (STY)|[17] Deamidation (N)	7.3848	0.535722	23	AGVMISASHNPALDN	S	100	ASAGVMISASHNPALDNGIK	[10] Phospho (STY)|[17] Deamidation (N)	68.6646	0.561761	AGVMISASHNPALDN	S	100	25343.9	23332	6723.49	6121.33	7474.97	5294.81	49589.6	40273.8	52537.6	51333.9	16070.7	12301.9	61688.9	58167.9	62182.6
387	853.409	2	1704.8	40.8	0.5254	4.98615	A0A0H3BYA0	PTS system, IIB component, putative OS=Streptococcus pyogenes serotype M49 (strain NZ131) OX=471876 GN=Spy49_1328c PE=4	ILAACGAGVNSSHQIK	ILAACGAGVNSSHQIK	[5] Carbamidomethyl (C)|[12] Phospho (STY)	105.43	1.50065	8	96.89	82.9147	CGAGVNSSHQIKDAI	S	15	ILAACGAGVNSSHQIK	[5] Carbamidomethyl (C)|[11] Phospho (STY)	7.5128	1.48685	4	ACGAGVNSSHQIKDA	S	14	ILAACGAGVNSSHQIK	[5] Carbamidomethyl (C)|[12] Phospho (STY)	71.8839	1.57656	CGAGVNSSHQIKDAI	S	15	5479.7	6651.22	4569.12	4450.42	5053.8	4710.77	36880	34662.7	30574.5	31285.4	6631.72	6374.75	3260.04	3246.5	2244.19
398	580.247	2	1158.48	37.4104	0.927467	2.90859	A0A0H3BZ76	Putative phosphoprotein phosphatase (PppL protein) OS=Streptococcus pyogenes serotype M49 (strain NZ131) OX=471876 GN=pppL PE=4	SNNQDFINK	SNNQDFINK	[1] Phospho (STY)	71.55	6.79718	21	100	100	TDIGQKRSNNQDFIN	S	14	SNNQDFINK	[1] Phospho (STY)	7.1883	6.77686	8	TDIGQKRSNNQDFIN	S	14	SNNQDFINK	[1] Phospho (STY)	88.846	6.75655	TDIGQKRSNNQDFIN	S	14	6523.04	7452.21	6906.47	7858.16	4862.48	4851.93	36166.1	36359.2	60562.8	58704.8	8438.63	9522.24	7193.75	6994.77	22345.3
403	527.235	2	1052.45	29.6628	0.82505	2.56233	A0A0H3BZB4	Phosphoenolpyruvate-protein phosphotransferase OS=Streptococcus pyogenes serotype M49 (strain NZ131) OX=471876 GN=ptsI PE=3	TSHSAIMAR	TSHSAIMAR	[1] Phospho (STY)	55.7	6.82451	8	95.34	86.3982	VTNIGGRTSHSAIMA	T	189	TSHSAIMAR	[1] Phospho (STY)	6.5867	6.80215	3	VTNIGGRTSHSAIMA	T	189	TSHSAIMAR	[2] Phospho (STY)	68.5914	6.77979	TNIGGRTSHSAIMAR	S	190	4245.85	4535.34	17599.5	16860.2	24623.4	22337.4	15021.6	13194.6	6846.5	7220.32	5925.7	5263.65	4742.38	4278.2	4986.02
406	476.219	2	950.423	46.2295	0.7431	2.63158	A0A0H3BYM9	Glyceraldehyde-3-phosphate dehydrogenase OS=Streptococcus pyogenes serotype M49 (strain NZ131) OX=471876 GN=plr PE=3	TLEYFAK	TLEYFAK	[4] Phospho (STY)	37.66	8.07482	6	99.99	99.735	QLVRTLEYFAKIAK-	Y	330					0				TLEYFAK	[4] Phospho (STY)	28.3193	8.02529	QLVRTLEYFAKIAK-	Y	330	2270.16	2499.62	1522.52	1934.9	951.846	1603.68	15774.4	17629.3	30062.2	30652.5	3085.27	3410.79	2184.73	2120.43	12931.2
414	768.682	3	2303.02	63.185	2.17472	4.36288	A0A0H3BYW2	EIICB-Lac OS=Streptococcus pyogenes serotype M49 (strain NZ131) OX=471876 GN=lacE PE=4	VYDEQILAEEAAGTNSSDALK	VYDEQILAEEAAGTNSSDALK	[17] Phospho (STY)	83.05	1.40251	10	82.31	44.1058	EAAGTNSSDALKEKV	S	428	VYDEQILAEEAAGTNSSDALK	[17] Phospho (STY)	7.368	1.3923	7	EAAGTNSSDALKEKV	S	428	VYDEQILAEEAAGTNSSDALK	[17] Phospho (STY)	75.9592	1.41528	EAAGTNSSDALKEKV	S	428	10183.4	9235	4930.47	3669.9	2619.29	2561.86	103140	113097	134801	146225	8578.45	8370.74	7314.62	7649.38	3511.79
416	622.289	2	1242.56	50.4308	0.689233	3.3241	A0A0H3BY05	Carbamate kinase OS=Streptococcus pyogenes serotype M49 (strain NZ131) OX=471876 GN=arcC PE=3	LEEVTVSQMK	LEEVTVSQMK	[7] Phospho (STY)	52.36	5.38081	9	99.38	96.5373	KLEEVTVSQMKEYIT	S	258	LEEVTVSQMK	[7] Phospho (STY)	7.1534	5.36188	6	KLEEVTVSQMKEYIT	S	258	LEEVTVSQMK	[7] Phospho (STY)	94.187	5.42342	KLEEVTVSQMKEYIT	S	258	3759.9	4188.71	2949.84	3447.17	1402.11	1740.16	30723.7	35350.5	59390.8	64014.6	4916.02	5141.4	2483.84	2350.57	4335.03
422	854.393	3	2560.16	58.8886	0.586667	4.84765	A0A0H3BYW2	EIICB-Lac OS=Streptococcus pyogenes serotype M49 (strain NZ131) OX=471876 GN=lacE PE=4	VYDEQILAEEAAGTNSSDALKEK	VYDEQILAEEAAGTNSSDALKEK	[17] Phospho (STY)	70.3	-0.614548	7	71.47	48.1662	EAAGTNSSDALKEKV	S	428	VYDEQILAEEAAGTNSSDALKEK	[17] Phospho (STY)	7.0566	-0.62374	3	EAAGTNSSDALKEKV	S	428	VYDEQILAEEAAGTNSSDALKEK	[17] Phospho (STY)	42.0533	-0.603064	EAAGTNSSDALKEKV	S	428	5079.91	4229.64	1794.14	1981.46	912.135	903.926	48404.2	49314.1	54224.8	53900.9	3083.54	2668.78	3188.41	3442.4	1739.32
429	950.471	1	949.464	28.8304	0.688983	8.241	B5XIW7	Chaperonin GroEL OS=Streptococcus pyogenes serotype M49 (strain NZ131) OX=471876 GN=groEL PE=3	AIAQPVSGK	AIAQPVSGK	[7] Phospho (STY)	32.37	0.191382	12	100	100	KAIAQPVSGKEAIAQ	S	138	AIAQPVSGK	[7] Phospho (STY)	8.1603	0.271919	6	KAIAQPVSGKEAIAQ	S	138								748.023	1089.25	1316.74	1643.08	868.439	969.016	14375.2	13575	19683.8	25973	1675.71	1595.63	772.428	940.391	3296.16
435	849.358	2	1696.7	42.7371	0.9481	4.50139	B5XI32	Elongation factor P OS=Streptococcus pyogenes serotype M49 (strain NZ131) OX=471876 GN=efp PE=3	TGSTFDTTYRPDEK	TGSTFDTTYRPDEK	[3] Phospho (STY)	79.39	2.24286	8	92.26	55.078	LRDVRTGSTFDTTYR	S	48	TGSTFDTTYRPDEK	[3] Phospho (STY)	7.234	2.28793	4	LRDVRTGSTFDTTYR	S	48	TGSTFDTTYRPDEK	[3] Phospho (STY)	68.0903	2.31913	LRDVRTGSTFDTTYR	S	48	2414.94	2563.24	2663.83	2841.1	1254.4	1122.24	34303.2	32529.2	37298.6	37247.4	3277.59	3336.25	3123.91	2968.96	11216
439	652.32	3	1953.94	50.4308	0.586683	3.1856	A0A0H3BZR7	Mid-cell-anchored protein Z OS=Streptococcus pyogenes serotype M49 (strain NZ131) OX=471876 GN=mapZ PE=3	EVEVTKESQTLGLNEAK	EVEVTKESQTLGLNEAK	[5] Phospho (STY)	85.26	4.16647	7	99.97	96.46	ESKEVEVTKESQTLG	T	11	EVEVTKESQTLGLNEAK	[5] Phospho (STY)	7.9823	4.15443	18	ESKEVEVTKESQTLG	T	11	EVEVTKESQTLGLNEAK	[8] Phospho (STY)	63.8451	4.2327	EVEVTKESQTLGLNE	S	14	21158.7	20834.7	4244.04	5102.93	6757.85	8509.49	4724.82	5915.97	967.756	1008.78	19639.7	20475.4	31222.9	29749.1	24358.7
441	622.638	3	1864.89	50.7512	0.681683	3.04709	B5XJR0	30S ribosomal protein S7 OS=Streptococcus pyogenes serotype M49 (strain NZ131) OX=471876 GN=rpsG PE=3	VGGSNYQVPVEVRPER	VGGSNYQVPVEVRPER	[4] Phospho (STY)	82.94	4.74582	10	100	99.994	RARRVGGSNYQVPVE	S	83	VGGSNYQVPVEVRPER	[4] Phospho (STY)	7.9002	4.78682	13	RARRVGGSNYQVPVE	S	83								4924.61	4629.58	1849.67	2679.09	1340.85	2137.72	24255.4	24638.1	33429.6	32356.6	4171.15	4618.71	5322.03	4934.22	34792.1
444	901.944	2	1801.87	43.8901	0.74335	4.84765	B5XMJ7	Cell cycle protein GpsB OS=Streptococcus pyogenes serotype M49 (strain NZ131) OX=471876 GN=gpsB PE=3	NTVSATVQQPVPQPTR	NTVSATVQQPVPQPTR	[2] Phospho (STY)	94.99	0.0700073	18	99.92	93.6135	AKYQARNTVSATVQQ	T	66	NTVSATVQQPVPQPTR	[2] Phospho (STY)	7.24	0.112445	14	AKYQARNTVSATVQQ	T	66	NTVSATVQQPVPQPTR	[4] Phospho (STY)	86.3904	0.0438865	YQARNTVSATVQQPV	S	68	27928	28424.9	5597.32	6255.48	17360.2	18578.5	4108.21	4234.43	1359.18	1305.95	17175.9	17471.8	34439	34772.3	37405.3
455	1098.05	2	2194.09	91.1945	0.627433	6.37119	B5XKI1	Elongation factor Tu OS=Streptococcus pyogenes serotype M49 (strain NZ131) OX=471876 GN=tuf PE=3	DTDKPLLLPVEDVFSITGR	DTDKPLLLPVEDVFSITGR	[17] Phospho (STY)	81.01	0.761568	21	98.82	76.299	VEDVFSITGRGTVAS	T	225	DTDKPLLLPVEDVFSITGR	[17] Phospho (STY)	8.3804	0.79642	18	VEDVFSITGRGTVAS	T	225	DTDKPLLLPVEDVFSITGR	[17] Phospho (STY)	75.0513	0.729391	VEDVFSITGRGTVAS	T	225	196.895	135.761	2202.62	1641.18	1319.11	423.681	63048.7	41980.5	58598.2	55177.9	1121.21	1168.34	4482.47	3177.32	11900.3
456	633.62	3	1897.84	62.2373	0.545517	2.63158	A0A0H3BZ95	UPF0371 protein Spy49_1067 OS=Streptococcus pyogenes serotype M49 (strain NZ131) OX=471876 GN=Spy49_1067 PE=3	GYPTDINHIISSEGMGK	GYPTDINHIISSEGMGK	[12] Phospho (STY)	58.69	4.99426	8	85.4	73.2913	DINHIISSEGMGKND	S	143					0											7534.73	6465.97	4171.32	3161.83	2093.69	1855.79	17731.6	20803.4	22115.6	27257.8	5250.09	5771.68	7749.53	6610.94	13448.3
457	471.224	2	940.433	28.0875	1.59562	2.49307	B5XHZ0	Chaperone protein DnaK OS=Streptococcus pyogenes serotype M49 (strain NZ131) OX=471876 GN=dnaK PE=3	NTTIPTSK	NTTIPTSK	[3] Phospho (STY)	58.27	6.33188	11	97.6	91.4109	KLIDRNTTIPTSKSQ	T	387					0				NTTIPTSK	[3] Phospho (STY)	57.1651	6.38817	KLIDRNTTIPTSKSQ	T	387	2914.91	3364.65	2467.28	2824.13	1956.87	2159.83	17587.4	18666.2	24538.7	30786.8	3942.59	4095.37	2816.93	2948.19	29686.2
459	525.227	2	1048.44	40.4386	1.07092	2.70083	A0A0H3C049	Spi SpeB protease inhibitor OS=Streptococcus pyogenes serotype M49 (strain NZ131) OX=471876 GN=Spy49_1689c PE=4	SMIEAYQK	SMIEAYQK	[1] Phospho (STY)	41.56	9.68916	16	99.99	99.8114	LNHDNVRSMIEAYQK	S	88					0				SMIEAYQK	[1] Phospho (STY)	92.8101	9.64426	LNHDNVRSMIEAYQK	S	88	5041.23	5490.91	4537.1	4864.44	2337.27	2285.84	37714.3	37556.6	114537	105074	6083.59	6717.49	3154.83	3128.72	5283.9
461	709.342	2	1416.67	52.2244	0.68165	4.01662	A0A0H3C178	Putative putative C3-degrading proteinase OS=Streptococcus pyogenes serotype M49 (strain NZ131) OX=471876 GN=cppA PE=4	HLQGTDLPSLEK	HLQGTDLPSLEK	[9] Phospho (STY)	43.87	2.4671	5	99.94	98.8929	LQGTDLPSLEKDATF	S	136	HLQGTDLPSLEK	[9] Phospho (STY)	6.1296	2.45048	11	LQGTDLPSLEKDATF	S	136								9752.53	10179.1	6523.04	6304.92	3868.83	3534.18	11053.5	10728.5	11151.1	9550.47	7428.15	7816.99	13301.9	12315.1	10079.8
465	554.566	3	1660.68	36.1013	0.525167	2.70083	B5XJX2	UPF0154 protein Spy49_0296 OS=Streptococcus pyogenes serotype M49 (strain NZ131) OX=471876 GN=Spy49_0296 PE=3	EMMSQMGQKPSEAK	EMMSQMGQKPSEAK	[11] Phospho (STY)	69.26	6.69767	11	100	99.81	SQMGQKPSEAKIQQT	S	56	EMMSQMGQKPSEAK	[11] Phospho (STY)	6.2482	6.6835	2	SQMGQKPSEAKIQQT	S	56	EMMSQMGQKPSEAK	[11] Phospho (STY)	70.972	6.71538	SQMGQKPSEAKIQQT	S	56	4137.73	3464.47	1492.63	1655.88	631.552	499.879	29269.7	32876.4	28329.1	32326.2	3775.65	4008.35	2381.69	2584.23	6577.31
469	679.77	2	1357.53	35.8555	0.804633	3.67036	B5XHZ0	Chaperone protein DnaK OS=Streptococcus pyogenes serotype M49 (strain NZ131) OX=471876 GN=dnaK PE=3	AAQESGNLDDMK	AAQESGNLDDMK	[5] Phospho (STY)	80.14	2.99487	14	100	100	ELKAAQESGNLDDMK	S	548	AAQESGNLDDMK	[5] Phospho (STY)	8.3098	2.97753	17	ELKAAQESGNLDDMK	S	548	AAQESGNLDDMK	[5] Phospho (STY)	76.4665	3.03386	ELKAAQESGNLDDMK	S	548	2259.79	2595.3	2852.92	3087.98	2219.67	2183.24	21439.7	21724.5	34272.4	35056.5	3429.49	3510.28	2199.1	2312.72	11928
471	693.838	2	1385.66	64.9035	0.729817	3.80886	B5XMJ7	Cell cycle protein GpsB OS=Streptococcus pyogenes serotype M49 (strain NZ131) OX=471876 GN=gpsB PE=3	VAQSATNFDILK	VAQSATNFDILK	[4] Phospho (STY)	88.58	1.77862	20	99.96	98.3823	QPTRVAQSATNFDIL	S	84	VAQSATNFDILK	[4] Phospho (STY)	7.1857	1.83381	14	QPTRVAQSATNFDIL	S	84	VAQSATNFDILK	[4] Phospho (STY)	84.5112	1.74465	QPTRVAQSATNFDIL	S	84	6532.89	6658.68	3658.58	3992.82	4071.84	4310.75	26218.4	24818.8	27587.6	29731.2	8364.14	7769.44	8092.79	8009.71	6362.09
486	796.85	2	1591.69	38.3379	0.586583	4.22438	B5XJR1	Elongation factor G OS=Streptococcus pyogenes serotype M49 (strain NZ131) OX=471876 GN=fusA PE=3	VDGMEAHGNSQIVR	VDGMEAHGNSQIVR	[10] Phospho (STY)	98.5	2.76579	12	100	100	GMEAHGNSQIVRAYV	S	638	VDGMEAHGNSQIVR	[10] Phospho (STY)	7.8877	2.75101	15	GMEAHGNSQIVRAYV	S	638	VDGMEAHGNSQIVR	[10] Phospho (STY)	51.7104	2.84709	GMEAHGNSQIVRAYV	S	638	1217.27	1614.52	1468.29	1722.94	847.13	869.632	15679.9	15386.5	22060	23550.5	2154.93	2174.48	2668.77	2596.37	13317.9
490	936.423	2	1870.83	46.9593	2.23637	5.0554	B5XIW7	Chaperonin GroEL OS=Streptococcus pyogenes serotype M49 (strain NZ131) OX=471876 GN=groEL PE=3	DSTVIVEGSGSSEAIANR	DSTVIVEGSGSSEAIANR	[12] Phospho (STY)	90.99	0.258455	15	95.08	59.3778	IVEGSGSSEAIANRI	S	337	DSTVIVEGSGSSEAIANR	[12] Phospho (STY)	8.525	0.245876	12	IVEGSGSSEAIANRI	S	337	DSTVIVEGSGSSEAIANR	[12] Phospho (STY)	66.4778	0.286749	IVEGSGSSEAIANRI	S	337	3835.95	4473.41	2275.01	2400.12	1658.53	1803.55	30207.6	32308.4	57170.6	58106.2	4727.85	4805.33	6034.88	5924.9	12392.8
491	888.411	2	1774.81	63.4848	0.852683	4.9169	B5XI40	30S ribosomal protein S6 OS=Streptococcus pyogenes serotype M49 (strain NZ131) OX=471876 GN=rpsF PE=3	FDSILTDNGATVVESK	FDSILTDNGATVVESK	[3] Phospho (STY)	102.25	2.20697	14	100	99.1473	ALVARFDSILTDNGA	S	28	FDSILTDNGATVVESK	[3] Phospho (STY)	8.0721	2.19371	21	ALVARFDSILTDNGA	S	28	FDSILTDNGATVVESK	[3] Phospho (STY)	84.0122	2.18045	ALVARFDSILTDNGA	S	28	3414.46	3145.63	3255.17	3086.43	1643.98	1782.71	22032.8	21145.2	45522.8	46495.9	4629.03	4235.31	3756.58	3928.7	22395.1
494	621.55	4	2482.17	49.2163	0.64075	3.11634	A0A0H3BZD6	Putative PTS system enzyme II OS=Streptococcus pyogenes serotype M49 (strain NZ131) OX=471876 GN=Spy49_1737c PE=4	TEDEAKLPETPVSDAPVATAPHK	TEDEAKLPETPVSDAPVATAPHK	[13] Phospho (STY)	146.27	2.64727	22	99.99	94.3596	KLPETPVSDAPVATA	S	507	TEDEAKLPETPVSDAPVATAPHK	[13] Phospho (STY)	6.1333	2.63779	2	KLPETPVSDAPVATA	S	507	TEDEAKLPETPVSDAPVATAPHK	[13] Phospho (STY)	53.3108	2.60935	KLPETPVSDAPVATA	S	507	8055.54	7818.99	1573.91	1675.22	710.756	900.542	22432.1	21958.1	19398.2	19758.1	4722.75	5672.13	5211.22	5533.93	8187.56
498	535.253	2	1068.49	36.4626	1.1733	2.83934	A0A0H3C004	Uncharacterized protein OS=Streptococcus pyogenes serotype M49 (strain NZ131) OX=471876 GN=Spy49_0627 PE=4	IVDDTIGTR	IVDDTIGTR	[5] Phospho (STY)	58.2	5.10895	26	99.98	97.3432	EEKIVDDTIGTRTRK	T	14					0				IVDDTIGTR	[5] Phospho (STY)	80.3409	5.15849	EEKIVDDTIGTRTRK	T	14	10592.4	11315.9	4485.89	4981.38	8887.75	9045.84	9637.26	10327	9522.86	9975.03	11018.3	12547.2	14524.7	14152.3	21548.9
499	810.059	3	2427.15	51.2149	0.845633	4.50139	B5XIW7	Chaperonin GroEL OS=Streptococcus pyogenes serotype M49 (strain NZ131) OX=471876 GN=groEL PE=3	ITVDKDSTVIVEGSGSSEAIANR	ITVDKDSTVIVEGSGSSEAIANR	[17] Phospho (STY)	95.92	0.783568	7	95.14	52.2112	IVEGSGSSEAIANRI	S	337	ITVDKDSTVIVEGSGSSEAIANR	[17] Phospho (STY)	8.5352	0.773872	14	IVEGSGSSEAIANRI	S	337	ITVDKDSTVIVEGSGSSEAIANR	[17] Phospho (STY)	78.4983	0.75448	IVEGSGSSEAIANRI	S	337	3483.49	3429.26	1052.04	1098.88	567.939	588.861	22761	22536.2	31369.2	33318.1	1611.88	2103.28	3606.71	4055.7	15828.3
500	666.292	2	1330.57	21.9906	0.668633	3.39335	A0A0H3BZL9	PTS system, fructose-specific IIABC component OS=Streptococcus pyogenes serotype M49 (strain NZ131) OX=471876 GN=fruA PE=4	NGKSETAVSTEK	NGKSETAVSTEK	[1] Deamidation (N)|[4] Phospho (STY)	79.81	3.1921	18	99.91	94.348	YHAKNGKSETAVSTE	S	274	NGKSETAVSTEK	[1] Deamidation (N)|[4] Phospho (STY)	6.8895	3.17441	9	YHAKNGKSETAVSTE	S	274	NGKSETAVSTEK	[1] Deamidation (N)|[4] Phospho (STY)	51.4365	3.23188	YHAKNGKSETAVSTE	S	274	3024.98	3585.98	3911.49	4097.85	3362.82	3570.29	16166.1	16653.7	5131.06	5437.67	5000.41	5047.93	4438.41	4621.96	5328.27
502	498.746	2	995.476	29.0763	2.15442	2.77008	A0A0H3BY55	Non-specific serine/threonine protein kinase OS=Streptococcus pyogenes serotype M49 (strain NZ131) OX=471876 GN=Spy49_1257c PE=4	VASGPTASVK	VASGPTASVK	[3] Phospho (STY)	58.88	7.60709	15	99.99	99.4788	KPLPKVASGPTASVK	S	299	VASGPTASVK	[3] Phospho (STY)	6.1347	7.68391	11	KPLPKVASGPTASVK	S	299	VASGPTASVK	[3] Phospho (STY)	74.8517	7.66027	KPLPKVASGPTASVK	S	299	7208.27	8204.43	6668.41	7297.54	5286.84	5626.17	12376.3	13462.7	12996.2	16747.5	10770.5	11100.1	9147.39	9487.24	10916.9
514	531.572	3	1591.69	38.3379	0.60705	2.49307	B5XJR1	Elongation factor G OS=Streptococcus pyogenes serotype M49 (strain NZ131) OX=471876 GN=fusA PE=3	VDGMEAHGNSQIVR	VDGMEAHGNSQIVR	[10] Phospho (STY)	103.39	7.93436	12	100	100	GMEAHGNSQIVRAYV	S	638	VDGMEAHGNSQIVR	[10] Phospho (STY)	7.8877	7.91957	7	GMEAHGNSQIVRAYV	S	638	VDGMEAHGNSQIVR	[10] Phospho (STY)	64.5407	8.01565	GMEAHGNSQIVRAYV	S	638	3226.68	3502.29	1663.88	2025.3	1062.74	1092.61	14263.8	15230.4	20911	21403.1	3854.41	3822.41	4745.75	4271.23	14386.8
516	979.11	3	2934.31	79.1296	4.03773	4.22438	A0A0H3BZJ0	Formate acetyltransferase OS=Streptococcus pyogenes serotype M49 (strain NZ131) OX=471876 GN=pfl PE=3	GVFLNEDGTVNTSQVEFFSPGANPSNK	GVFLNEDGTVNTSQVEFFSPGANPSNK	[13] Phospho (STY)	132.18	0.120546	5	93.61	61.3357	EDGTVNTSQVEFFSP	S	637	GVFLNEDGTVNTSQVEFFSPGANPSNK	[13] Phospho (STY)	8.5123	0.146606	3	EDGTVNTSQVEFFSP	S	637	GVFLNEDGTVNTSQVEFFSPGANPSNK	[13] Phospho (STY)	16.4177	0.130566	EDGTVNTSQVEFFSP	S	637	56.7272	21.0303	869.064	477	1066.89	627.73	161566	127159	184689	174525	3634.62	2419.46	6145.86	5226.82	4487.71
530	672.804	2	1343.59	28.0466	0.504567	3.53186	A0A0H3BZR7	Mid-cell-anchored protein Z OS=Streptococcus pyogenes serotype M49 (strain NZ131) OX=471876 GN=mapZ PE=3	SEESKEVEVTK	SEESKEVEVTK	[4] Phospho (STY)	42.41	6.33935	6	99.07	91.9712	---MSEESKEVEVTK	S	5					0				SEESKEVEVTK	[4] Phospho (STY)	25.7011	6.37875	---MSEESKEVEVTK	S	5	4952.2	5257.41	4144.31	4224.2	2744.23	2997.82	13683.8	13781.1	11130.5	10486.4	6599.02	6893.66	6044.9	5984.62	9050.41
531	754.654	3	2260.94	58.8271	1.91672	3.4626	A0A0H3BZ18	Cell-division initiation protein OS=Streptococcus pyogenes serotype M49 (strain NZ131) OX=471876 GN=divIVA PE=4	TVLNEDIPESDDSASFDATR	TVLNEDIPESDDSASFDATR	[19] Phospho (STY)	80.55	0.698998	19	99.87	92.4743	DSASFDATRQFTPEE	T	201	TVLNEDIPESDDSASFDATR	[19] Phospho (STY)	8.1171	0.732819	24	DSASFDATRQFTPEE	T	201	TVLNEDIPESDDSASFDATR	[19] Phospho (STY)	41.6609	0.756231	DSASFDATRQFTPEE	T	201	51831	47735.1	15215.1	13257.1	11003.1	12372.1	6085.74	7305.78	3944.24	5224.97	27441.8	26815.9	16777.3	17482.7	40922.8
536	551.753	2	1101.49	42.4576	0.906933	2.90859	B5XIW7	Chaperonin GroEL OS=Streptococcus pyogenes serotype M49 (strain NZ131) OX=471876 GN=groEL PE=3	DIKFSADAR	DIKFSADAR	[5] Phospho (STY)	44.93	5.8991	12	100	100	MAKDIKFSADARAAM	S	8					0				DIKFSADAR	[5] Phospho (STY)	87.0145	5.85637	MAKDIKFSADARAAM	S	8	4519.32	4679.98	4018.98	4333.53	2001.08	2070.82	9435.17	9009.71	15676.4	14836.9	5296.58	5194.44	11236.1	11523.7	37936.2
541	740.306	2	1478.6	45.8681	0.668583	3.87812	B5XIW7	Chaperonin GroEL OS=Streptococcus pyogenes serotype M49 (strain NZ131) OX=471876 GN=groEL PE=3	SQLETTTSDFDR	SQLETTTSDFDR	[8] Phospho (STY)	69.41	2.75747	18	93.46	67.7189	SQLETTTSDFDREKL	S	356	SQLETTTSDFDR	[8] Phospho (STY)	8.5159	2.74156	11	SQLETTTSDFDREKL	S	356								3079.57	3249.59	2501.09	2781.36	1706.64	1668.95	19542.5	19863.4	34024.8	35531.7	4354.87	4490.01	3663.36	3771.99	13958
546	611.962	3	1832.86	45.4453	0.6071	3.04709	A0A0H3BY55	Non-specific serine/threonine protein kinase OS=Streptococcus pyogenes serotype M49 (strain NZ131) OX=471876 GN=Spy49_1257c PE=4	YIQNHAPLSNNEVVR	YIQNHAPLSNNEVVR	[9] Phospho (STY)	68.13	4.11485	13	100	99.9921	IQNHAPLSNNEVVRI	S	109	YIQNHAPLSNNEVVR	[9] Phospho (STY)	5.9069	4.10201	12	IQNHAPLSNNEVVRI	S	109	YIQNHAPLSNNEVVR	[9] Phospho (STY)	25.3315	4.13089	IQNHAPLSNNEVVRI	S	109	5627.69	5769.29	2722.14	3052.66	1371.76	1375.77	21407.9	23076.6	19381.4	23417.7	5498.82	5254.68	5650.75	5362.06	22356.9
547	621.55	4	2482.17	47.0207	0.545517	3.25485	A0A0H3BZD6	Putative PTS system enzyme II OS=Streptococcus pyogenes serotype M49 (strain NZ131) OX=471876 GN=Spy49_1737c PE=4	TEDEAKLPETPVSDAPVATAPHK	TEDEAKLPETPVSDAPVATAPHK	[10] Phospho (STY)	114.77	2.65827	17	99.98	98.2158	DEAKLPETPVSDAPV	T	504	TEDEAKLPETPVSDAPVATAPHK	[10] Phospho (STY)	6.3073	2.64879	2	DEAKLPETPVSDAPV	T	504	TEDEAKLPETPVSDAPVATAPHK	[10] Phospho (STY)	63.3416	2.62035	DEAKLPETPVSDAPV	T	504	7463.62	7110.83	1469.54	1413.73	652.464	651.848	19931.9	23320.8	15538.1	18639.9	5439.87	5889.21	5237.25	5485.13	6790.33
548	512.234	2	1022.45	54.2022	0.743083	2.70083	A0A0H3BZL9	PTS system, fructose-specific IIABC component OS=Streptococcus pyogenes serotype M49 (strain NZ131) OX=471876 GN=fruA PE=4	TSLGGAFYK	TSLGGAFYK	[2] Phospho (STY)	48.04	6.77254	9	90.26	76.9945	AVSTEKTSLGGAFYK	S	284	TSLGGAFYK	[2] Phospho (STY)	6.9307	6.74952	2	AVSTEKTSLGGAFYK	S	284	TSLGGAFYK	[2] Phospho (STY)	98.6262	6.7265	AVSTEKTSLGGAFYK	S	284	4700.22	3909.69	3991.13	3565.81	2065.83	2558.76	14100.6	15210.4	21931.7	24050.6	5485.96	6197.64	4260.63	4957.17	3633.96
554	509.701	2	1017.39	32.3224	1.35022	2.35457	A0A0H3BYC1	DNA-directed RNA polymerase subunit alpha OS=Streptococcus pyogenes serotype M49 (strain NZ131) OX=471876 GN=rpoA PE=3	VGSNDGFDK	VGSNDGFDK	[3] Phospho (STY)	54.35	6.68557	13	100	100	VEPARVGSNDGFDKL	S	185	VGSNDGFDK	[3] Phospho (STY)	6.1683	6.76073	3	VEPARVGSNDGFDKL	S	185	VGSNDGFDK	[3] Phospho (STY)	92.9147	6.7376	VEPARVGSNDGFDKL	S	185	2597.14	2946.86	2791.17	3030.24	2310.02	2095.26	20132.9	19713.6	42869.5	43537.4	3882	4065.08	2808.59	2836.15	10964.9
557	527.234	2	1052.45	27.8082	0.742933	2.63158	A0A0H3BZB4	Phosphoenolpyruvate-protein phosphotransferase OS=Streptococcus pyogenes serotype M49 (strain NZ131) OX=471876 GN=ptsI PE=3	TSHSAIMAR	TSHSAIMAR	[2] Phospho (STY)	40.71	5.17645	12	60.61	50.0224	TNIGGRTSHSAIMAR	S	190					0				TSHSAIMAR	[2] Phospho (STY)	85.627	5.13173	TNIGGRTSHSAIMAR	S	190	6566.75	7008.68	7036.56	7712.5	5724.55	5902.31	8658.99	9177.75	3139.21	3368.38	6238.06	5928.78	5619.69	5576.27	28233.4
560	768.682	3	2303.02	62.4756	0.7503	4.08587	A0A0H3BYW2	EIICB-Lac OS=Streptococcus pyogenes serotype M49 (strain NZ131) OX=471876 GN=lacE PE=4	VYDEQILAEEAAGTNSSDALK	VYDEQILAEEAAGTNSSDALK	[16] Phospho (STY)	89.03	1.68142	4	46.06	39.636	EEAAGTNSSDALKEK	S	427	VYDEQILAEEAAGTNSSDALK	[16] Phospho (STY)	7.3549	1.67121	8	EEAAGTNSSDALKEK	S	427	VYDEQILAEEAAGTNSSDALK	[17] Phospho (STY)	77.2064	1.69419	EAAGTNSSDALKEKV	S	428	6280.53	5243.51	2691.16	2519.85	1555.62	1749.58	56320	60203.6	73669.2	83767.5	5974.12	5718.84	3990.13	4288.37	2078.28
561	794.393	2	1586.77	58.745	1.03005	4.50139	B5XI32	Elongation factor P OS=Streptococcus pyogenes serotype M49 (strain NZ131) OX=471876 GN=efp PE=3	LIINTAEGTYVSRA	LIINTAEGTYVSRA	[12] Phospho (STY)	107.43	0.647345	13	99.99	78.5227	TAEGTYVSRA-----	S	183	LIINTAEGTYVSRA	[12] Phospho (STY)	7.1496	0.632514	8	TAEGTYVSRA-----	S	183	LIINTAEGTYVSRA	[12] Phospho (STY)	76.4727	0.680704	TAEGTYVSRA-----	S	183	2617.73	2369.1	1902.34	1944.28	774.437	897.734	24343.3	25664.6	35324.7	38068.1	2543.1	2636.16	3054.31	3159.8	15097.9
564	841.371	1	840.364	65.5644	0.742917	7.06371	A0A0H3BVE1	30S ribosomal protein S5 OS=Streptococcus pyogenes serotype M49 (strain NZ131) OX=471876 GN=rpsE PE=3	GISVSDLA	GISVSDLA	[3] Phospho (STY)	37.84	1.0898	6	85.25	75.3617	VAALRGISVSDLA--	S	159					0											1439.21	1684.52	2038.37	1965.65	1128.63	1226.92	15793.4	16297.6	30037.9	29638.1	3138.8	3078.6	2156.37	2296.94	9746.96
574	995.386	2	1988.76	67.665	0.791433	5.19391	A0A0H3C000	Putative phosphotransferase system (PTS), enzyme II component C OS=Streptococcus pyogenes serotype M49 (strain NZ131) OX=471876 GN=Spy49_0835 PE=4	QTTFDSKESEEEDFFA	QTTFDSKESEEEDFFA	[9] Phospho (STY)	34.04	0.496024	3	46.83	42.7833	TTFDSKESEEEDFFA	S	237					0											5268.54	5293.12	3512.91	3109.28	1753.55	1579.86	59046.7	56179	79511.5	83063	4822.03	4494.78	1926.94	1510.57	1936.66
575	621.289	2	1240.56	73.0935	1.0709	3.25485	B5XKI1	Elongation factor Tu OS=Streptococcus pyogenes serotype M49 (strain NZ131) OX=471876 GN=tuf PE=3	TVGSGIVSEIEA	TVGSGIVSEIEA	[4] Phospho (STY)	51.1	4.47266	6	97.03	92.4817	EGGRTVGSGIVSEIE	S	390	TVGSGIVSEIEA	[4] Phospho (STY)	8.1212	4.45369	8	EGGRTVGSGIVSEIE	S	390	TVGSGIVSEIEA	[4] Phospho (STY)	92.1754	4.43472	EGGRTVGSGIVSEIE	S	390	1545.79	1507.53	975.562	897.806	605.956	560.206	28552.4	31947.4	64276.9	68930.8	1841.99	1919.89	994.334	962.298	15906.7
577	571.268	2	1140.52	41.0664	0.648083	3.04709	A0A0H3BZT5	Peptide chain release factor 2 OS=Streptococcus pyogenes serotype M49 (strain NZ131) OX=471876 GN=prfB PE=3	TSQELNELK	TSQELNELK	[2] Phospho (STY)	37.13	13.0248	4	89.93	79.225	NIAAQKTSQELNELK	S	17					0											7887.84	8453.75	7993.7	7969.48	3253.92	3274.23	21513.5	19414.2	26443.7	20971.8	13660.2	13041.9	12819.3	12946.5	15876.8
578	626.804	2	1251.59	49.0189	0.689283	3.53186	A0A0H3BZ43	Uncharacterized protein OS=Streptococcus pyogenes serotype M49 (strain NZ131) OX=471876 GN=Spy49_1003c PE=3	HVPTIYDSIK	HVPTIYDSIK	[8] Phospho (STY)	34.91	3.55124	5	99.76	99.516	HVPTIYDSIKSIVEE	S	96					0				HVPTIYDSIK	[8] Phospho (STY)	91.0334	3.51363	HVPTIYDSIKSIVEE	S	96	3002.06	3321.01	1473.24	1347.28	575.181	537.348	19446.5	20628.7	33629.9	35433	2241.99	2241.72	2347.33	2266.32	10819.4
580	793.39	2	1584.76	67.6446	0.681667	4.36288	A0A0H3BWF1	Protein translocase subunit SecY OS=Streptococcus pyogenes serotype M49 (strain NZ131) OX=471876 GN=secY PE=3	LMQGAPTSSYLPLK	LMQGAPTSSYLPLK	[8] Phospho (STY)	35.29	1.4183	3	67.59	66.2533	LMQGAPTSSYLPLKV	S	257					0				LMQGAPTSSYLPLK	[8] Phospho (STY)	78.086	1.4517	LMQGAPTSSYLPLKV	S	257	1216.82	1321.62	944.499	1058.95	357.149	365.314	15720.7	16094.3	54409.2	59133.9	1314.63	1315.83	791.08	719.553	2828.04
581	1000.76	3	2999.27	68.6335	0.5867	4.70914	A0A0H3BZC1	Uncharacterized protein OS=Streptococcus pyogenes serotype M49 (strain NZ131) OX=471876 GN=Spy49_0377 PE=4	METFESDDAVDFDTKVMTLPEKDEK	METFESDDAVDFDTKVMTLPEKDEK	[14] Phospho (STY)	58.56	-0.0776008	9	98.96	80.3111	DDAVDFDTKVMTLPE	T	30					0				METFESDDAVDFDTKVMTLPEKDEK	[14] Phospho (STY)	46.1426	-0.0756445	DDAVDFDTKVMTLPE	T	30	8586.75	7730.58	7918.55	5310.09	8176.05	4704.95	2675.39	2210.57	941.177	1043.75	6596.2	4014.22	39082.9	32458.3	18459.9
595	621.289	2	1240.56	68.7974	0.627517	3.39335	B5XKI1	Elongation factor Tu OS=Streptococcus pyogenes serotype M49 (strain NZ131) OX=471876 GN=tuf PE=3	TVGSGIVSEIEA	TVGSGIVSEIEA	[8] Phospho (STY)	55.92	3.77041	4	94.34	71.4533	TVGSGIVSEIEA---	S	394	TVGSGIVSEIEA	[8] Phospho (STY)	7.8763	3.75144	4	TVGSGIVSEIEA---	S	394	TVGSGIVSEIEA	[4] Phospho (STY)	95.1297	3.73247	EGGRTVGSGIVSEIE	S	390	1903.97	1931.41	1200.84	957.462	583.102	633.032	24205	27242.9	57608.7	64350.8	2511	2533.64	1367.3	1562.54	13447.4
597	983.936	2	1965.86	45.5272	0.886617	5.26316	A0A0H3BXI0	Uncharacterized protein OS=Streptococcus pyogenes serotype M49 (strain NZ131) OX=471876 GN=Spy49_1001c PE=3	VTSAASSTSQFVSEQTEK	VTSAASSTSQFVSEQTEK	[9] Phospho (STY)	104.85	0.337438	14	93.61	67.1044	TSAASSTSQFVSEQT	S	137	VTSAASSTSQFVSEQTEK	[9] Phospho (STY)	8.567	0.325467	18	TSAASSTSQFVSEQT	S	137								2533.82	3607.23	1416.55	1587.46	1274.52	1377.5	16381.2	16567.4	11068.2	11387.4	4796.49	4392.64	2880.23	2772.43	7802.09
599	675.822	2	1349.63	43.2419	0.525267	4.15512	B5XM69	2,3-bisphosphoglycerate-dependent phosphoglycerate mutase OS=Streptococcus pyogenes serotype M49 (strain NZ131) OX=471876 GN=gpmA PE=3	NVFVGAHGNSIR	NVFVGAHGNSIR	[10] Phospho (STY)	49.04	4.5538	6	100	100	FVGAHGNSIRALVKH	S	185	NVFVGAHGNSIR	[10] Phospho (STY)	7.9441	4.53636	2	FVGAHGNSIRALVKH	S	185	NVFVGAHGNSIR	[10] Phospho (STY)	79.9315	4.50149	FVGAHGNSIRALVKH	S	185	205.624	259.033	136.878	115.463	35.3508	24.3264	15406.9	14861.7	24112.1	23953.7	191.779	173.344	197.534	195.188	25582.1
603	704	3	2108.98	46.816	0.450517	3.11634	B5XKP7	ATP synthase subunit b OS=Streptococcus pyogenes serotype M49 (strain NZ131) OX=471876 GN=atpF PE=3	DIDQAEQSRLSAQQLEAK	DIDQAEQSRLSAQQLEAK	[11] Phospho (STY)	78.46	2.16761	6	95.43	62.9057	QAEQSRLSAQQLEAK	S	58	DIDQAEQSRLSAQQLEAK	[8] Phospho (STY)	6.8868	2.15645	6	DIDQAEQSRLSAQQL	S	55	DIDQAEQSRLSAQQLEAK	[11] Phospho (STY)	58.3036	2.13414	QAEQSRLSAQQLEAK	S	58	3422.87	3414.76	1332.13	1481.52	811.903	723.469	26876.6	27502.8	23621.5	25362.6	3487.81	3455.84	2676.91	2584.6	4618.94
605	477.242	2	952.469	40.3157	1.0299	2.56233	B5XJ55	50S ribosomal protein L15 OS=Streptococcus pyogenes serotype M49 (strain NZ131) OX=471876 GN=rplO PE=3	SAEAAIIAK	SAEAAIIAK	[1] Phospho (STY)	74.49	5.9041	15	100	100	KAAKFSKSAEAAIIA	S	131	SAEAAIIAK	[1] Phospho (STY)	7.7716	5.8794	7	KAAKFSKSAEAAIIA	S	131	SAEAAIIAK	[1] Phospho (STY)	95.341	5.85469	KAAKFSKSAEAAIIA	S	131	2714.65	2818.66	2292.81	2500.97	1518.8	1621.8	13748.2	14038.8	24535.6	23659.8	3189.04	3414.61	2815.3	2734.66	7649.63
611	824.327	3	2469.96	56.8081	0.545767	3.25485	B5XJR1	Elongation factor G OS=Streptococcus pyogenes serotype M49 (strain NZ131) OX=471876 GN=fusA PE=3	IGETHEGASQMDWMEQEQER	IGETHEGASQMDWMEQEQER	[9] Phospho (STY)	81.14	0.658979	15	89.13	57.0529	GETHEGASQMDWMEQ	S	48	IGETHEGASQMDWMEQEQER	[9] Phospho (STY)	8.0151	0.649452	8	GETHEGASQMDWMEQ	S	48	IGETHEGASQMDWMEQEQER	[9] Phospho (STY)	74.9869	0.711369	GETHEGASQMDWMEQ	S	48	4674.44	4125.17	1438.66	1466.99	1602.27	1634.88	18695.6	19479	14595.4	15253.9	3233.79	2930.51	4068.65	3950.15	10308.7
612	685.806	2	1369.6	56.3852	0.566167	3.53186	A0A0H3BYM9	Glyceraldehyde-3-phosphate dehydrogenase OS=Streptococcus pyogenes serotype M49 (strain NZ131) OX=471876 GN=plr PE=3	NVSVDEINAAMK	NVSVDEINAAMK	[3] Phospho (STY)	66.01	1.82361	12	100	100	VTLDKNVSVDEINAA	S	255	NVSVDEINAAMK	[3] Phospho (STY)	8.6099	1.80643	13	VTLDKNVSVDEINAA	S	255	NVSVDEINAAMK	[3] Phospho (STY)	84.6712	1.78924	VTLDKNVSVDEINAA	S	255	1572.69	1277.92	1240.39	1403.87	504.35	748.586	13482.2	14756.2	30513.4	30902.8	2029.72	1846.59	1305.37	1565.16	9205.42
615	805.39	2	1608.77	67.4193	0.58665	4.43213	A0A0H3C2K4	Alkyl hydroperoxide reductase C OS=Streptococcus pyogenes serotype M49 (strain NZ131) OX=471876 GN=ahpC PE=3	EGAETLTPSLDLVGK	EGAETLTPSLDLVGK	[9] Phospho (STY)	87.88	0.49783	13	99.66	94.4214	GAETLTPSLDLVGKI	S	179	EGAETLTPSLDLVGK	[9] Phospho (STY)	7.9943	0.545362	13	GAETLTPSLDLVGKI	S	179	EGAETLTPSLDLVGK	[9] Phospho (STY)	86.6727	0.468574	GAETLTPSLDLVGKI	S	179	2185.22	2238.44	1361.25	1345.78	584.088	720.024	13211.9	14864.1	37470.2	39673.6	2599.01	2544.68	1840.62	2087.57	4773.09
616	626.78	2	1251.54	66.7169	0.525267	3.4626	A0A0H3C0J7	Phosphocarrier protein HPr OS=Streptococcus pyogenes serotype M49 (strain NZ131) OX=471876 GN=ptsH PE=3	FASDITLDYK	FASDITLDYK	[3] Phospho (STY)	76.06	1.99868	18	99.99	97.9037	QTASKFASDITLDYK	S	31	FASDITLDYK	[3] Phospho (STY)	7.0853	1.97988	8	QTASKFASDITLDYK	S	31	FASDITLDYK	[3] Phospho (STY)	37.7157	1.96107	QTASKFASDITLDYK	S	31	10065.9	10515.9	8742.12	9419.78	6648.26	6950.46	6248.91	6074.75	5962.91	6092.6	6197.28	6615.65	2983.82	2919.45	9568.9
627	628.302	2	1254.59	37.6973	0.607083	3.67036	A0A0H3BY05	Carbamate kinase OS=Streptococcus pyogenes serotype M49 (strain NZ131) OX=471876 GN=arcC PE=3	AQQEALISTSK	AQQEALISTSK	[8] Phospho (STY)	63.24	3.47571	4	33.33	33.33	AQQEALISTSKSLVK	S	31	AQQEALISTSK	[8] Phospho (STY)	8.1882	3.53666	7	AQQEALISTSKSLVK	S	31								2764.53	3069.53	2483.43	2741.97	1304.4	1404.17	24120.2	25516.5	40164.7	41910.7	3443.27	3552.96	1877.45	1945.51	2831.92
628	668.784	2	1335.55	35.8964	0.866067	3.60111	A0A0H3C114	Inosine-5'-monophosphate dehydrogenase OS=Streptococcus pyogenes serotype M49 (strain NZ131) OX=471876 GN=guaB PE=3	YFQGSVNEANK	YFQGSVNEANK	[5] Phospho (STY)	54.18	3.50693	11	100	99.94	SDRYFQGSVNEANKL	S	411	YFQGSVNEANK	[5] Phospho (STY)	7.376	3.48931	12	SDRYFQGSVNEANKL	S	411	YFQGSVNEANK	[5] Phospho (STY)	85.4937	3.47169	SDRYFQGSVNEANKL	S	411	2037.01	2292.52	2329.05	2670.87	1632.19	1606.06	19110.5	19324.4	19545.8	19501.8	3756.2	3852.44	2463.5	2479.43	9360.6
633	474.895	3	1421.66	41.7686	0.545917	2.35457	A0A0H3C2P8	Uncharacterized protein OS=Streptococcus pyogenes serotype M49 (strain NZ131) OX=471876 GN=Spy49_1748c PE=4	KETIELANDGPR	KETIELANDGPR	[3] Phospho (STY)	104.14	5.97774	23	100	100	DEFIRKETIELANDG	T	13					0				KETIELANDGPR	[3] Phospho (STY)	41.4873	5.99842	DEFIRKETIELANDG	T	13	16171.5	17012.3	3449.53	4057.83	4921.08	5092.46	1323.66	1445.13	647.585	875.256	10221.6	10462.8	12589.7	11924.6	12661.9
635	610.84	2	1219.66	51.3993	0.648067	3.3241	A0A0H3C2S7	Uncharacterized protein OS=Streptococcus pyogenes serotype M49 (strain NZ131) OX=471876 GN=Spy49_1801c PE=4	NKETLVIPVK	NKETLVIPVK	[4] Phospho (STY)	59.92	5.56063	8	100	100	EVSKNKETLVIPVKT	T	125	NKETLVIPVK	[4] Phospho (STY)	7.4107	5.54134	4	EVSKNKETLVIPVKT	T	125	NKETLVIPVK	[4] Phospho (STY)	73.2113	5.66673	EVSKNKETLVIPVKT	T	125	6039.1	5718.06	674.559	648.142	2101.65	2325.03	878.606	893.951	194.232	194.294	3880.42	3745.42	17236.5	17838.8	38738.8
645	983.936	2	1965.86	44.136	0.566183	5.33241	A0A0H3BXI0	Uncharacterized protein OS=Streptococcus pyogenes serotype M49 (strain NZ131) OX=471876 GN=Spy49_1001c PE=3	VTSAASSTSQFVSEQTEK	VTSAASSTSQFVSEQTEK	[7] Phospho (STY)	80.77	0.35349	9	87.61	65.1064	RVTSAASSTSQFVSE	S	135	VTSAASSTSQFVSEQTEK	[7] Phospho (STY)	8.4417	0.341519	16	RVTSAASSTSQFVSE	S	135	VTSAASSTSQFVSEQTEK	[8] Phospho (STY)	33.7482	0.329549	VTSAASSTSQFVSEQ	T	136	3262.26	3670.34	1340.25	1466.63	1239.62	1326.55	14578.4	15314.3	8327.81	8760.38	4646.67	4382.97	2662.32	2699.29	7458.96
646	813.394	2	1624.77	54.0794	0.784033	4.57064	A0A0H3C0R9	Phosphopantothenoylcysteine synthetase OS=Streptococcus pyogenes serotype M49 (strain NZ131) OX=471876 GN=dpfB PE=4	ALLISNNEVASADTK	ALLISNNEVASADTK	[11] Phospho (STY)	94.85	1.54476	13	99.99	93.6985	ISNNEVASADTKEAI	S	211					0				ALLISNNEVASADTK	[14] Phospho (STY)	76.0688	1.57734	NEVASADTKEAIADL	T	214	7028.87	7234.94	5411.05	6258.96	3273.34	4130.34	38758.7	42075.9	36075.4	43380.2	6830.3	7346	5132.43	5824.86	25131.7
650	1635.2	2	3268.38	67.6446	0.968533	9.14127	A0A0H3BZ18	Cell-division initiation protein OS=Streptococcus pyogenes serotype M49 (strain NZ131) OX=471876 GN=divIVA PE=4	ELEAYQLDSQSDSTTEPEVNLSETQTFK	ELEAYQLDSQSDSTTEPEVNLSETQTFK	[24] Phospho (STY)	188.41	-11.4413	16	97.46	84.0661	PEVNLSETQTFKLNI	T	245	ELEAYQLDSQSDSTTEPEVNLSETQTFK	[24] Phospho (STY)	8.4128	-11.4485	16	PEVNLSETQTFKLNI	T	245								12510.1	12685.2	13187.3	12821.8	20414.2	17358.8	5284.65	4354.14	480.856	380.128	21652.4	22885.9	68101.3	50927.8	36773.2
659	735.348	2	1468.68	45.1995	0.934933	4.01662	B5XJR1	Elongation factor G OS=Streptococcus pyogenes serotype M49 (strain NZ131) OX=471876 GN=fusA PE=3	VEANVGAPQVSYR	VEANVGAPQVSYR	[11] Phospho (STY)	61.42	7.72446	8	100	99.9688	NVGAPQVSYRETFRA	S	480	VEANVGAPQVSYR	[11] Phospho (STY)	8.0643	7.70843	8	NVGAPQVSYRETFRA	S	480	VEANVGAPQVSYR	[11] Phospho (STY)	90.1912	7.7605	NVGAPQVSYRETFRA	S	480	2273.05	2308.88	1732.75	1750.7	795.861	802.2	7836.97	7877.22	14129.5	14252.9	4050.15	4179.86	5219.26	5667.59	29800.1
662	923.343	2	1844.67	54.9119	1.25537	4.9169	A0A0H3BZC1	Uncharacterized protein OS=Streptococcus pyogenes serotype M49 (strain NZ131) OX=471876 GN=Spy49_0377 PE=4	METFESDDAVDFDTK	METFESDDAVDFDTK	[1] Oxidation (M)|[14] Phospho (STY)	84.7	0.528395	13	100	99.2038	DDAVDFDTKVMTLPE	T	30					0				METFESDDAVDFDTK	[1] Oxidation (M)|[14] Phospho (STY)	79.0749	0.502881	DDAVDFDTKVMTLPE	T	30	30605.4	29105	16342	18980	29126.8	34390.3	6415.2	6180.5	2086.05	2110.42	26668.9	28032.8	35834.4	37729.2	8489.77
664	982.478	2	1962.94	65.1213	1.00913	5.54017	B5XK64	Ribosome-recycling factor OS=Streptococcus pyogenes serotype M49 (strain NZ131) OX=471876 GN=frr PE=3	ALNASDLGITPANDGSVIR	ALNASDLGITPANDGSVIR	[16] Phospho (STY)	68.16	0.306653	8	99.97	94.8188	ITPANDGSVIRLVIP	S	96	ALNASDLGITPANDGSVIR	[16] Phospho (STY)	7.184	0.345608	14	ITPANDGSVIRLVIP	S	96	ALNASDLGITPANDGSVIR	[16] Phospho (STY)	76.8323	0.282676	ITPANDGSVIRLVIP	S	96	2294.59	2327.27	2268.16	1982.61	1090.61	1000.51	22265.1	22369.1	57707.8	56619.3	3413.37	3318.58	2372.23	2422.9	17617.4
665	949.922	2	1897.83	62.2373	0.484083	5.12465	A0A0H3BZ95	UPF0371 protein Spy49_1067 OS=Streptococcus pyogenes serotype M49 (strain NZ131) OX=471876 GN=Spy49_1067 PE=3	GYPTDINHIISSEGMGK	GYPTDINHIISSEGMGK	[12] Phospho (STY)	61.06	0.49208	7	86.18	77.0786	DINHIISSEGMGKND	S	143					0											2455.89	2281.35	2835.44	2110.69	1483.68	1271.63	14779.4	12787.3	14969.5	17160.1	2305.93	2303.38	3311.3	3099.88	7583.74
666	586.596	3	1756.76	43.7877	0.62025	3.39335	A0A0H3BYW2	EIICB-Lac OS=Streptococcus pyogenes serotype M49 (strain NZ131) OX=471876 GN=lacE PE=4	EYGAPVTAAAGSYGAHR	EYGAPVTAAAGSYGAHR	[12] Phospho (STY)	86.21	4.44979	9	100	99.59	PVTAAAGSYGAHREI	S	499	EYGAPVTAAAGSYGAHR	[12] Phospho (STY)	6.7528	4.43639	7	PVTAAAGSYGAHREI	S	499	EYGAPVTAAAGSYGAHR	[12] Phospho (STY)	83.5483	4.52345	PVTAAAGSYGAHREI	S	499	4421.07	4535.47	1533.97	1653.2	1074.24	1173.62	30984.4	34202.5	37281	37646.5	4349.3	4546.64	2771.5	2889.91	2252.33
667	569.29	2	1136.57	52.4497	0.5661	3.1856	B5XHX4	Serine--tRNA ligase OS=Streptococcus pyogenes serotype M49 (strain NZ131) OX=471876 GN=serS PE=3	NIASAAIAQAK	NIASAAIAQAK	[4] Phospho (STY)	51.76	5.47757	10	100	100	KAERNIASAAIAQAK	S	56	NIASAAIAQAK	[4] Phospho (STY)	7.3067	5.45686	9	KAERNIASAAIAQAK	S	56	NIASAAIAQAK	[4] Phospho (STY)	78.0432	5.43616	KAERNIASAAIAQAK	S	56	657.464	735.538	486.966	623.15	240.626	373.776	4195.93	4534.28	6806.38	7380.19	954.469	1028.09	1133.73	1164.25	17259.3
668	739.794	2	1477.57	42.9828	0.484317	3.94737	A0A0H3BXY9	Isoleucine--tRNA ligase OS=Streptococcus pyogenes serotype M49 (strain NZ131) OX=471876 GN=ileS PE=3	SYNAFVCDHSAK	SYNAFVCDHSAK	[1] Phospho (STY)|[7] Carbamidomethyl (C)	72.19	2.72965	10	100	99.9508	DPTTRMRSYNAFVCD	S	888	SYNAFVCDHSAK	[2] Phospho (STY)|[7] Carbamidomethyl (C)	5.6804	2.71373	2	PTTRMRSYNAFVCDH	Y	889	SYNAFVCDHSAK	[1] Phospho (STY)|[7] Carbamidomethyl (C)	85.5044	2.74955	DPTTRMRSYNAFVCD	S	888	2607.02	3621.22	3358.34	4064.1	1475.43	1545.42	47371.4	43940.1	51223.7	44617.8	4686.09	4135.95	3913.16	3749.35	8762.69
671	1086.46	2	2170.91	84.838	0.9071	5.81717	A0A0H3BZX9	PTS system, mannose-specific IIC component OS=Streptococcus pyogenes serotype M49 (strain NZ131) OX=471876 GN=manM PE=4	KGGNGGNAAGSADPIGDILEDY	KGGNGGNAAGSADPIGDILEDY	[4] Deamidation (N)|[11] Phospho (STY)	94.06	0.414604	9	93.22	85.1922	NGGNAAGSADPIGDI	S	258	KGGNGGNAAGSADPIGDILEDY	[4] Deamidation (N)|[11] Phospho (STY)	7.4612	0.449827	8	NGGNAAGSADPIGDI	S	258	KGGNGGNAAGSADPIGDILEDY	[4] Deamidation (N)|[11] Phospho (STY)	50.7648	0.392923	NGGNAAGSADPIGDI	S	258	3088.88	3011.87	2824.01	2534.38	1799.5	1783.3	45981.5	43974.1	72562.7	73632.4	3436.75	3484.94	5017.63	4693.78	24350.4
676	740.359	2	1478.7	44.231	0.722783	3.94737	A0A0H3BZ03	R3H domain protein OS=Streptococcus pyogenes serotype M49 (strain NZ131) OX=471876 GN=Spy49_0209 PE=4	KPAQVDIEGISDK	KPAQVDIEGISDK	[11] Phospho (STY)	108.43	1.47284	12	100	100	QVDIEGISDKTVYKA	S	55	KPAQVDIEGISDK	[11] Phospho (STY)	7.6203	1.52455	12	QVDIEGISDKTVYKA	S	55								2980.9	3178.93	1720.99	1768.08	858.873	912.343	15275	15086.2	16109.7	16476.8	3763	3806.73	4026.08	4177.82	5334.33
681	487.214	2	972.413	36.3192	0.82505	2.56233	A0A0H3BZ23	Cell division protein FtsZ OS=Streptococcus pyogenes serotype M49 (strain NZ131) OX=471876 GN=ftsZ PE=3	AEQVSGFR	AEQVSGFR	[5] Phospho (STY)	55.68	6.24971	18	100	100	QEKAEQVSGFRQPRT	S	325					0				AEQVSGFR	[5] Phospho (STY)	64.2755	6.20131	QEKAEQVSGFRQPRT	S	325	2028.83	2314.91	2276.31	2387.96	1767.66	1753.62	9015.23	10437	16397.7	16945.4	3330.32	3482.94	2496.57	2662.15	11680.8
686	629.283	2	1256.55	47.9686	0.668467	3.39335	B5XIW7	Chaperonin GroEL OS=Streptococcus pyogenes serotype M49 (strain NZ131) OX=471876 GN=groEL PE=3	DATMTALGQAAK	DATMTALGQAAK	[5] Phospho (STY)	62.24	3.56647	16	99.78	94.6113	ELKDATMTALGQAAK	T	313	DATMTALGQAAK	[5] Phospho (STY)	8.3433	3.62733	17	ELKDATMTALGQAAK	T	313	DATMTALGQAAK	[5] Phospho (STY)	84.8521	3.52902	ELKDATMTALGQAAK	T	313	2045.47	2316.57	1940.01	2069.62	1057.17	1314.14	10193.1	11146.2	21594.1	23428	3575.28	3560.18	2963.73	3130.68	12096.7
687	570.239	2	1138.46	42.5395	0.607133	3.3241	A0A0H3BZY3	3-oxoacyl-[acyl-carrier-protein] synthase 2 OS=Streptococcus pyogenes serotype M49 (strain NZ131) OX=471876 GN=fabF PE=3	FDTTDYAVK	FDTTDYAVK	[3] Phospho (STY)	54.28	3.60274	10	94.14	92.212	GPITKFDTTDYAVKN	T	43	FDTTDYAVK	[3] Phospho (STY)	7.3493	3.66991	8	GPITKFDTTDYAVKN	T	43								7833.04	9239.23	5584.58	6291.22	7305.96	7605.85	6677.14	6279.38	7444.46	7985.37	7184.14	6906.41	8389.57	8117.63	6485.57
692	760.352	3	2278.03	61.1053	0.968183	3.94737	A0A0H3BZC7	EIIAB-Man OS=Streptococcus pyogenes serotype M49 (strain NZ131) OX=471876 GN=manL PE=4	AVEGGVEINELNVGSMAHSTGK	AVEGGVEINELNVGSMAHSTGK	[20] Phospho (STY)	72.38	1.39543	6	48.52	41.9317	VGSMAHSTGKTMVNN	T	278	AVEGGVEINELNVGSMAHSTGK	[20] Phospho (STY)	7.6849	1.429	6	VGSMAHSTGKTMVNN	T	278	AVEGGVEINELNVGSMAHSTGK	[20] Phospho (STY)	49.8822	1.45223	VGSMAHSTGKTMVNN	T	278	3670.15	3724	1843.8	1693.05	1120.84	848.42	22636.1	25909.3	28296	28147.2	3000.43	2898.96	7679.15	7932.47	20671
695	757.687	3	2270.04	69.8067	0.927583	4.15512	B5XKM7	Enolase OS=Streptococcus pyogenes serotype M49 (strain NZ131) OX=471876 GN=eno PE=3	SGETEDSTIADIAVATNAGQIK	SGETEDSTIADIAVATNAGQIK	[1] Phospho (STY)	132.87	3.48208	7	91.22	76.8086	TAVVSHRSGETEDST	S	374	SGETEDSTIADIAVATNAGQIK	[1] Phospho (STY)	9.0746	3.47171	17	TAVVSHRSGETEDST	S	374	SGETEDSTIADIAVATNAGQIK	[1] Phospho (STY)	69.607	3.53908	TAVVSHRSGETEDST	S	374	1110.53	1091.23	417.189	353.449	256.72	195.873	3320.09	4036.89	9633.55	10723.3	1366.51	1501.76	8491.24	9613.32	66336.7
702	1241.64	2	2481.26	82.3963	0.579233	7.20222	A0A0H3C1H3	Fructose-bisphosphate aldolase class II OS=Streptococcus pyogenes serotype M49 (strain NZ131) OX=471876 GN=fba PE=4	LTAAVPGFPIVLHGGSGIPDDQIK	LTAAVPGFPIVLHGGSGIPDDQIK	[16] Phospho (STY)	74.55	-1.18517	13	100	99.9777	PIVLHGGSGIPDDQI	S	211	LTAAVPGFPIVLHGGSGIPDDQIK	[16] Phospho (STY)	8.0541	-1.15435	18	PIVLHGGSGIPDDQI	S	211								161.673	127.556	771.879	687.98	606.2	436.832	26587.8	19260.8	38810.2	31882.3	643.593	650.806	3536.12	3196	29381.1
705	667.933	3	2000.78	50.5872	0.989017	2.77008	A0A0H3BZC1	Uncharacterized protein OS=Streptococcus pyogenes serotype M49 (strain NZ131) OX=471876 GN=Spy49_0377 PE=4	RMETFESDDAVDFDTK	RMETFESDDAVDFDTK	[2] Oxidation (M)|[15] Phospho (STY)	64.43	2.58769	11	100	99.8864	DDAVDFDTKVMTLPE	T	30					0				RMETFESDDAVDFDTK	[2] Oxidation (M)|[15] Phospho (STY)	78.2178	2.5524	DDAVDFDTKVMTLPE	T	30	36867.7	35250.8	9397.84	9808.64	15243.5	17076.9	1769.81	2119.7	711.761	709.383	21397.3	21700.6	38216.5	37051.7	12952.6
709	620.786	2	1239.56	41.8914	0.72285	3.39335	B5XKR6	30S ribosomal protein S21 OS=Streptococcus pyogenes serotype M49 (strain NZ131) OX=471876 GN=rpsU PE=3	KNESLDDALR	KNESLDDALR	[4] Phospho (STY)	75.96	6.78135	9	100	100	TVVRKNESLDDALRR	S	11	KNESLDDALR	[4] Phospho (STY)	6.0896	6.76236	5	TVVRKNESLDDALRR	S	11	KNESLDDALR	[4] Phospho (STY)	88.5142	6.74338	TVVRKNESLDDALRR	S	11	1361.71	1373.82	1248.24	1283.7	555.676	605.685	7110.77	6861.9	10181.8	10885	1943.7	1999.81	2294.57	2377.3	15732.3
715	899.921	2	1797.83	45.95	0.9274	5.0554	B5XIY2	Histidine ammonia-lyase OS=Streptococcus pyogenes serotype M49 (strain NZ131) OX=471876 GN=hutH PE=3	NLLEGSQNTTVATQSR	NLLEGSQNTTVATQSR	[15] Phospho (STY)	93.51	1.23923	7	99.3	77.2488	NTTVATQSRVQDPYT	S	274	NLLEGSQNTTVATQSR	[15] Phospho (STY)	7.5883	1.22614	4	NTTVATQSRVQDPYT	S	274	NLLEGSQNTTVATQSR	[15] Phospho (STY)	57.7235	1.21305	NTTVATQSRVQDPYT	S	274	2237.11	2574.07	1429.51	1468.66	484.575	514.31	24567	25040.9	66484.3	71876.6	2962.42	2952.78	1462.45	1665.64	2292.15
718	657.796	2	1313.58	46.5981	0.463617	3.53186	A0A0H3BYE4	Signal recognition particle protein OS=Streptococcus pyogenes serotype M49 (strain NZ131) OX=471876 GN=ffh PE=3	LSESDVQEVTK	LSESDVQEVTK	[4] Phospho (STY)	84.34	2.18242	14	99.98	95.6713	GKKKLSESDVQEVTK	S	26	LSESDVQEVTK	[4] Phospho (STY)	7.0536	2.24063	12	GKKKLSESDVQEVTK	S	26	LSESDVQEVTK	[4] Phospho (STY)	79.5107	2.14658	GKKKLSESDVQEVTK	S	26	2513.78	2644.45	2219.88	2242.38	1189.06	1331.32	13254.4	13574.9	19979.7	19591.5	3845.97	3620.17	3232.71	3491.69	9552.74
724	590.577	3	1768.71	24.9165	0.607083	2.77008	B5XJ39	50S ribosomal protein L2 OS=Streptococcus pyogenes serotype M49 (strain NZ131) OX=471876 GN=rplB PE=3	GSVMNPNDHPHGGGEGK	GSVMNPNDHPHGGGEGK	[2] Phospho (STY)	64.17	6.01855	4	100	100	IRPTVRGSVMNPNDH	S	223	GSVMNPNDHPHGGGEGK	[2] Phospho (STY)	7.5895	6.06178	5	IRPTVRGSVMNPNDH	S	223	GSVMNPNDHPHGGGEGK	[2] Phospho (STY)	42.1189	5.97863	IRPTVRGSVMNPNDH	S	223	704.974	904.431	407.056	406.717	121.631	166.852	2113.76	2296.3	416.106	905.259	709.327	604.389	833.286	874.341	3785.03
727	559.747	2	1117.48	31.4358	0.92755	2.90859	A0A0H3C0C0	30S ribosomal protein S14 OS=Streptococcus pyogenes serotype M49 (strain NZ131) OX=471876 GN=rpsN2 PE=3	AKGDYESLR	AKGDYESLR	[7] Phospho (STY)	77.88	-0.689283	4	100	99.9975	KAKGDYESLRKLPRD	S	35					0				AKGDYESLR	[7] Phospho (STY)	73.421	-0.641914	KAKGDYESLRKLPRD	S	35	1562.29	1918.07	1417.88	1630.67	988.681	1227.12	11630.7	11972.1	23236.1	23844.7	2933.84	3327.29	2515.27	2698.28	22746.3
730	469.741	4	1874.93	38.1201	1.37077	2.56233	B5XKI1	Elongation factor Tu OS=Streptococcus pyogenes serotype M49 (strain NZ131) OX=471876 GN=tuf PE=3	SKPHVNIGTIGHVDHGK	SKPHVNIGTIGHVDHGK	[1] Phospho (STY)	120.56	9.78926	3	100	99.0467	AKEKYDRSKPHVNIG	S	9					0				SKPHVNIGTIGHVDHGK	[1] Phospho (STY)	44.4824	9.79239	AKEKYDRSKPHVNIG	S	9	3892.52	3884.02	896.348	1064.47	178.627	232.954	11965.7	11425.1	17021.1	16645.5	599.74	542.27	1416.08	1433.5	19922.9
734	868.874	2	1735.73	43.0647	0.484317	4.77839	B5XIW7	Chaperonin GroEL OS=Streptococcus pyogenes serotype M49 (strain NZ131) OX=471876 GN=groEL PE=3	SQLETTTSDFDREK	SQLETTTSDFDREK	[8] Phospho (STY)	71.85	1.55575	9	92.74	75.196	SQLETTTSDFDREKL	S	356	SQLETTTSDFDREK	[8] Phospho (STY)	8.3548	1.5998	10	SQLETTTSDFDREKL	S	356	SQLETTTSDFDREK	[8] Phospho (STY)	52.3842	1.57269	SQLETTTSDFDREKL	S	356	410.025	570.154	651.324	703.064	216.928	158.727	12739.7	10625.8	15069	16050.7	722.729	698.946	578.384	476.394	4762.17
738	915.923	2	1829.83	56.8285	0.586717	4.98615	A0A0H3C1H3	Fructose-bisphosphate aldolase class II OS=Streptococcus pyogenes serotype M49 (strain NZ131) OX=471876 GN=fba PE=4	VNVNTESQIAFSNATR	VNVNTESQIAFSNATR	[5] Phospho (STY)	101.21	-0.0353666	14	99.89	98.4693	VAKVNVNTESQIAFS	T	233	VNVNTESQIAFSNATR	[5] Phospho (STY)	8.7265	0.0064224	24	VAKVNVNTESQIAFS	T	233	VNVNTESQIAFSNATR	[5] Phospho (STY)	79.0793	-0.0192992	VAKVNVNTESQIAFS	T	233	3995.43	3846.6	4002.82	4268.38	2611.5	2862.83	7471.43	7860.78	18777.9	20026.4	5499.47	5872.42	6244.12	6831.59	26487.3
742	988.108	3	2961.3	47.1362	1.00927	4.22438	A0A0H3BZJ8	Cell division protein FtsA OS=Streptococcus pyogenes serotype M49 (strain NZ131) OX=471876 GN=ftsA PE=3	RPESTIGYEQQASQTAYDSQVPSDPK					0						RPESTIGYEQQASQTAYDSQVPSDPK	[4] Phospho (STY)	7.3069	-0.641845	4	DDSRRPESTIGYEQQ	S	416								16481.6	15447.9	8164.04	7212.35	8225.24	7299.16	8586.06	8588.05	2252	2354.49	14341.1	12823.1	20167	19122.3	8850.51
743	954.929	2	1907.84	50.8332	0.504767	4.98615	A0A0H3C0G3	Uncharacterized protein OS=Streptococcus pyogenes serotype M49 (strain NZ131) OX=471876 GN=Spy49_1599c PE=4	AGSHPQTSQINVGEFEK	AGSHPQTSQINVGEFEK	[7] Phospho (STY)	63.67	1.32792	4	74.75	54.9575	KAGSHPQTSQINVGE	T	67	AGSHPQTSQINVGEFEK	[8] Phospho (STY)	7.4006	1.368	15	AGSHPQTSQINVGEF	S	68								2760.42	3081.29	2473.56	2242.62	1089.27	1103.29	42069.7	36325.2	32113.3	29076.7	4696.94	3991.54	3449.02	3532.53	4953.95
748	575.29	2	1148.57	50.0694	0.66855	3.11634	B5XJ99	30S ribosomal protein S4 OS=Streptococcus pyogenes serotype M49 (strain NZ131) OX=471876 GN=rpsD PE=3	VDPGQVISVR	VDPGQVISVR	[8] Phospho (STY)	65.36	5.30025	11	100	100	VDPGQVISVREKSMK	S	141	VDPGQVISVR	[8] Phospho (STY)	6.785	5.36682	3	VDPGQVISVREKSMK	S	141	VDPGQVISVR	[8] Phospho (STY)	67.3065	5.34634	VDPGQVISVREKSMK	S	141	269.176	360.029	308.616	321.887	147.903	139.616	4020.16	4229.61	11937.4	12355.4	309.255	271.517	897.805	974.131	12440.5
757	854.865	2	1707.72	62.5166	0.6479	4.50139	B5XKU5	UPF0342 protein Spy49_0636 OS=Streptococcus pyogenes serotype M49 (strain NZ131) OX=471876 GN=Spy49_0636 PE=3	SQEIYDYANQLER	SQEIYDYANQLER	[1] Phospho (STY)	67.26	0.8091	21	100	99.9876	------MSQEIYDYA	S	2	SQEIYDYANQLER	[1] Phospho (STY)	7.504	0.795319	15	------MSQEIYDYA	S	2	SQEIYDYANQLER	[1] Phospho (STY)	89.2796	0.840097	------MSQEIYDYA	S	2	8840.4	7696.7	8163.69	7772.8	7906.72	7705.86	17330.9	15687.1	30571.3	30745	5953.3	5819.62	5131.07	5349.24	4171.28
758	624.297	3	1869.87	58.0559	0.886667	2.97784	A0A0H3BZL3	Conserved hypothetical integral membrane protein OS=Streptococcus pyogenes serotype M49 (strain NZ131) OX=471876 GN=Spy49_1194c PE=4	ELFQLQNSGEDLNKR	ELFQLQNSGEDLNKR	[8] Phospho (STY)	79.65	3.30282	7	100	100	ELFQLQNSGEDLNKR	S	186	ELFQLQNSGEDLNKR	[8] Phospho (STY)	7.1698	3.29024	7	ELFQLQNSGEDLNKR	S	186	ELFQLQNSGEDLNKR	[8] Phospho (STY)	56.1895	3.26507	ELFQLQNSGEDLNKR	S	186	4170.84	4174.36	2008.39	2015.55	864.405	788.97	28372.5	31302.2	39434.4	46744.6	2508.24	2376.86	4353.36	4648.28	2857.35
760	1176.23	3	3525.67	95.982	1.00942	5.54017	A0A0H3BZ03	R3H domain protein OS=Streptococcus pyogenes serotype M49 (strain NZ131) OX=471876 GN=Spy49_0209 PE=4	LEAEDTKVVPLMSEDSPAQTLSNLAETVTETK	LEAEDTKVVPLMSEDSPAQTLSNLAETVTETK	[6] Phospho (STY)	108.25	-0.0509498	5	99.99	95.836	QKLEAEDTKVVPLMS	T	103	LEAEDTKVVPLMSEDSPAQTLSNLAETVTETK	[6] Phospho (STY)	7.5808	-0.0292612	9	QKLEAEDTKVVPLMS	T	103								1593.99	1103.96	313.525	67.2369	16099.3	7329.88	7209.87	6566.67	1279.35	1202.47	9407.98	7640.37	68341.4	62031.8	92685.5
771	841.372	1	840.364	61.6098	0.80435	7.27147	A0A0H3BVE1	30S ribosomal protein S5 OS=Streptococcus pyogenes serotype M49 (strain NZ131) OX=471876 GN=rpsE PE=3	GISVSDLA	GISVSDLA	[3] Phospho (STY)	60.49	1.74232	10	99.77	97.779	VAALRGISVSDLA--	S	159					0											913.349	1090.44	1527.04	1504.68	969.688	842.062	13248	12259.5	24771.6	23565.8	1970.3	2186.62	1189.14	1229.83	5752.95
773	881.899	2	1761.78	48.3503	0.8454	4.77839	A0A0H3BZ03	R3H domain protein OS=Streptococcus pyogenes serotype M49 (strain NZ131) OX=471876 GN=Spy49_0209 PE=4	NAPAVNSADVEPEEIK	NAPAVNSADVEPEEIK	[7] Phospho (STY)	58.65	0.705851	8	100	100	KNAPAVNSADVEPEE	S	84	NAPAVNSADVEPEEIK	[7] Phospho (STY)	8.0965	0.692494	15	KNAPAVNSADVEPEE	S	84	NAPAVNSADVEPEEIK	[7] Phospho (STY)	54.1428	0.679136	KNAPAVNSADVEPEE	S	84	2950.89	3006.32	2442.81	2736.71	1668.26	1975.58	22114.1	22323.3	29381.4	32145.7	4872.52	5001.41	3832.66	3817.2	5540.6
777	623.968	3	1868.88	30.2495	0.46375	2.90859	B5XJ47	50S ribosomal protein L24 OS=Streptococcus pyogenes serotype M49 (strain NZ131) OX=471876 GN=rplX PE=3	HQKPNTENPQGAIVEK	HQKPNTENPQGAIVEK	[6] Phospho (STY)	66.88	2.91087	6	100	100	KKHQKPNTENPQGAI	T	49	HQKPNTENPQGAIVEK	[6] Phospho (STY)	7.8533	2.95179	9	KKHQKPNTENPQGAI	T	49	HQKPNTENPQGAIVEK	[6] Phospho (STY)	60.1186	2.8731	KKHQKPNTENPQGAI	T	49	2211.43	2603.11	763.701	753.328	280.367	267.918	7291.93	6935.91	2836.57	3061.19	2789.09	2484.15	4779.47	4850.52	22097.3
789	671.943	3	2012.81	49.2371	1.194	3.04709	B5XJR1	Elongation factor G OS=Streptococcus pyogenes serotype M49 (strain NZ131) OX=471876 GN=fusA PE=3	LYDGSYHDVDSSETAFK	LYDGSYHDVDSSETAFK	[14] Phospho (STY)	63.17	2.25274	6	95.19	66.9183	HDVDSSETAFKIAAS	T	578	LYDGSYHDVDSSETAFK	[14] Phospho (STY)	7.6541	2.29073	5	HDVDSSETAFKIAAS	T	578	LYDGSYHDVDSSETAFK	[14] Phospho (STY)	28.4575	2.21766	HDVDSSETAFKIAAS	T	578	2507.46	2292.64	1057.69	1072.24	579.596	615.564	5014.6	4304.51	6805.51	6523.34	2741.03	2761.51	8148.46	7837.88	34421.7
797	450.578	3	1348.71	43.8901	0.8867	2.28532	B5XKI2	Triosephosphate isomerase OS=Streptococcus pyogenes serotype M49 (strain NZ131) OX=471876 GN=tpiA PE=3	SRKPIIAGNWK	SRKPIIAGNWK	[1] Phospho (STY)	54.02	7.92594	5	100	100	------MSRKPIIAG	S	2					0				SRKPIIAGNWK	[1] Phospho (STY)	64.1095	7.8736	------MSRKPIIAG	S	2	2864.86	2738.6	801.603	800.181	84.3747	73.8056	9578.53	10639.9	8767.37	10214.3	520.301	561.854	2849.83	2858.85	22449.1
798	579.588	3	1735.74	43.0443	0.54575	2.63158	B5XIW7	Chaperonin GroEL OS=Streptococcus pyogenes serotype M49 (strain NZ131) OX=471876 GN=groEL PE=3	SQLETTTSDFDREK	SQLETTTSDFDREK	[8] Phospho (STY)	71.83	6.26419	9	92.12	74.643	SQLETTTSDFDREKL	S	356	SQLETTTSDFDREK	[8] Phospho (STY)	8.3548	6.30824	8	SQLETTTSDFDREKL	S	356	SQLETTTSDFDREK	[8] Phospho (STY)	59.0446	6.28113	SQLETTTSDFDREKL	S	356	2243.79	2426.43	850.909	904.675	306.181	326.55	10797.1	10779.9	13807.1	15160.9	2123.44	2145.78	1903.97	1722	12005.2
799	543.767	2	1085.52	54.4277	0.566167	2.90859	A0A0H3C2S7	Uncharacterized protein OS=Streptococcus pyogenes serotype M49 (strain NZ131) OX=471876 GN=Spy49_1801c PE=4	TISPVSQFK	TISPVSQFK	[6] Phospho (STY)	28.7	3.851	2	99.66	99.615	LKTISPVSQFKSNNR	S	148					0											5562.59	6357.22	3931.58	4382.17	3843.89	4931.63	4048.76	3990.09	3472.45	3302.25	7436.27	7340.04	7998.18	8128.54	8627.95
803	599.299	2	1196.58	28.3668	0.566	3.11634	A0A0H3C1S0	CsbD domain-containing protein OS=Streptococcus pyogenes serotype M49 (strain NZ131) OX=471876 GN=Spy49_1665c PE=3	SKIEQASGGLK	SKIEQASGGLK	[1] Phospho (STY)	76.19	2.45655	14	100	99.9806	MSEEKLKSKIEQASG	S	8	SKIEQASGGLK	[1] Phospho (STY)	7.1308	2.43689	7	MSEEKLKSKIEQASG	S	8	SKIEQASGGLK	[1] Phospho (STY)	67.6555	2.41722	MSEEKLKSKIEQASG	S	8	1555.9	1869.62	1125.45	1175.74	593.537	600.752	6301.03	6419.64	4379.2	4292.72	2837.03	2722.29	1921.01	2022.36	7485.29
804	523.723	2	1045.43	35.8145	0.668667	2.63158	A0A0H3C1B5	Cell division protein SepF OS=Streptococcus pyogenes serotype M49 (strain NZ131) OX=471876 GN=sepF PE=3	MSTSSIANR	MSTSSIANR	[4] Phospho (STY)	54.76	5.27491	15	87.47	71.755	RRKRMSTSSIANRRE	S	108	MSTSSIANR	[4] Phospho (STY)	7.6511	5.2524	11	RRKRMSTSSIANRRE	S	108								3390.64	4088.79	3127.92	3369.2	4394	4537.93	15063	15670.3	19306.1	19810.8	5825.56	5352.77	9232.65	6526.99	9830.38
811	1069.92	2	2137.83	55.6346	0.812083	5.74792	A0A0H3BZ03	R3H domain protein OS=Streptococcus pyogenes serotype M49 (strain NZ131) OX=471876 GN=Spy49_0209 PE=4	VLESGQDYTMDPMSNSER	VLESGQDYTMDPMSNSER	[16] Phospho (STY)	75.15	0.390404	8	93.46	81.1178	TMDPMSNSERKIVHK	S	270	VLESGQDYTMDPMSNSER	[16] Phospho (STY)	7.911	0.379396	12	TMDPMSNSERKIVHK	S	270	VLESGQDYTMDPMSNSER	[16] Phospho (STY)	55.7153	0.415165	TMDPMSNSERKIVHK	S	270	1965.12	2128.05	2804.39	2969.23	1315.9	1256.49	27930.9	27946.5	31095.4	35466	4353.43	4065.54	2411.3	2305.12	4528.47
817	561.791	2	1121.57	29.8807	0.422817	3.11634	A0A0H3BXB3	Uncharacterized protein OS=Streptococcus pyogenes serotype M49 (strain NZ131) OX=471876 GN=Spy49_0911c PE=4	HGYVTKPIK	HGYVTKPIK	[5] Phospho (STY)	44.09	3.16109	9	100	99.876	YVKHGYVTKPIKKKY	T	56					0				HGYVTKPIK	[5] Phospho (STY)	47.9351	3.27646	YVKHGYVTKPIKKKY	T	56	3277.43	4091.38	1446.49	1973.58	695.934	1055.35	3496.73	3245.83	1721.25	1589.27	3321.2	3984.69	6023.7	6453.18	6092.93
818	546.281	3	1635.82	28.7354	0.893783	2.97784	B5XHV3	Translation initiation factor IF-2 OS=Streptococcus pyogenes serotype M49 (strain NZ131) OX=471876 GN=infB PE=3	ASKPDVTASQTVKPK					0						ASKPDVTASQTVKPK	[2] Phospho (STY)	5.9711	-2.04336	8	ISSFSKASKPDVTAS	S	54								4946.05	5861.83	3005.8	6629.67	1707.12	2310.5	5724.56	6356.05	2645.59	3080.95	7296.02	5832.56	5663.62	5370.85	11061.1
831	750.826	2	1499.64	39.7087	0.6686	3.94737	B5XJR0	30S ribosomal protein S7 OS=Streptococcus pyogenes serotype M49 (strain NZ131) OX=471876 GN=rpsG PE=3	EIMDAANNTGASVK	EIMDAANNTGASVK	[12] Phospho (STY)	77.77	3.25622	9	99.95	85.8445	AANNTGASVKKREDT	S	134	EIMDAANNTGASVK	[12] Phospho (STY)	7.5953	3.24053	7	AANNTGASVKKREDT	S	134	EIMDAANNTGASVK	[12] Phospho (STY)	83.0779	3.29152	AANNTGASVKKREDT	S	134	240.543	208.702	218.332	293.003	235.674	216.104	4001.52	3980.16	6146.88	6825.94	297.941	217.445	412.694	361.787	4676.67
838	675.844	2	1349.67	62.8852	0.566	3.53186	A0A0H3BVE1	30S ribosomal protein S5 OS=Streptococcus pyogenes serotype M49 (strain NZ131) OX=471876 GN=rpsE PE=3	SLGSNTPINIVR	SLGSNTPINIVR	[4] Phospho (STY)	77.14	2.0279	9	99.63	94.66	ITSKSLGSNTPINIV	S	129	SLGSNTPINIVR	[4] Phospho (STY)	7.7442	2.01046	8	ITSKSLGSNTPINIV	S	129	SLGSNTPINIVR	[4] Phospho (STY)	87.6368	1.99303	ITSKSLGSNTPINIV	S	129	899.969	1022.61	612.976	718.548	305.686	346.845	4232.08	4323.09	11562.7	12561.7	532.752	516.302	832.442	712.257	9276.25
840	557.243	2	1112.47	36.9263	0.82505	2.77008	A0A0H3BZ23	Cell division protein FtsZ OS=Streptococcus pyogenes serotype M49 (strain NZ131) OX=471876 GN=ftsZ PE=3	QSVQPGFDR					0						QSVQPGFDR	[2] Phospho (STY)	7.2465	5.01897	2	ASDQAKQSVQPGFDR	S	354	QSVQPGFDR	[2] Phospho (STY)	75.7065	4.90793	ASDQAKQSVQPGFDR	S	354	1699.92	1678.21	1413.94	1620.18	1387.66	1392.59	8699.48	8486.45	9044.13	9522.02	2396.63	2600.72	2125.1	2110.34	7525.61
857	1085.97	2	2169.92	83.2419	0.648183	5.88643	A0A0H3BZX9	PTS system, mannose-specific IIC component OS=Streptococcus pyogenes serotype M49 (strain NZ131) OX=471876 GN=manM PE=4	KGGNGGNAAGSADPIGDILEDY	KGGNGGNAAGSADPIGDILEDY	[11] Phospho (STY)	72.38	0.112729	13	100	99.9577	NGGNAAGSADPIGDI	S	258	KGGNGGNAAGSADPIGDILEDY	[11] Phospho (STY)	7.2808	0.147968	14	NGGNAAGSADPIGDI	S	258	KGGNGGNAAGSADPIGDILEDY	[11] Phospho (STY)	60.4406	0.0801935	NGGNAAGSADPIGDI	S	258	2426.09	2196	2331.08	2081.7	1525.57	1422.62	33294.7	35831.7	41586.9	42874.6	2834.15	2682.78	4031.24	4032.23	27284.3
858	700.326	2	1398.64	42.0143	0.4302	3.87812	A0A0H3BZ61	F420_ligase domain-containing protein OS=Streptococcus pyogenes serotype M49 (strain NZ131) OX=471876 GN=Spy49_0453 PE=4	TEVIDSQGETIK	TEVIDSQGETIK	[6] Phospho (STY)	65.98	7.53196	4	99.93	97.1975	RKTEVIDSQGETIKF	S	189					0				TEVIDSQGETIK	[6] Phospho (STY)	79.0663	7.56981	RKTEVIDSQGETIKF	S	189	127.42	145.373	62.299	73.045	25.7926	55.5222	180.92	250.525	246.734	236.381	123.341	92.2172	1244.56	1275.45	41270.5
859	708.788	2	1415.56	39.7496	0.5867	3.53186	B5XKI1	Elongation factor Tu OS=Streptococcus pyogenes serotype M49 (strain NZ131) OX=471876 GN=tuf PE=3	DYASIDAAPEER	DYASIDAAPEER	[2] Phospho (STY)	73.95	0.957531	26	100	99.9954	SVNQPKDYASIDAAP	Y	50	DYASIDAAPEER	[2] Phospho (STY)	8.3415	0.940906	23	SVNQPKDYASIDAAP	Y	50	DYASIDAAPEER	[2] Phospho (STY)	95.2124	0.924282	SVNQPKDYASIDAAP	Y	50	2628.44	2823.95	2538.06	2598.04	1844.09	1924.86	11751.7	11895.9	16891.8	18436.2	2945.21	2848.59	2570.58	2497.05	5841.94
861	525.755	2	1049.5	49.6802	0.968517	2.90859	A0A0H3C114	Inosine-5'-monophosphate dehydrogenase OS=Streptococcus pyogenes serotype M49 (strain NZ131) OX=471876 GN=guaB PE=3	LPLVDNSGR	LPLVDNSGR	[7] Phospho (STY)	50.26	5.08593	11	100	100	KLPLVDNSGRLSGLI	S	194					0				LPLVDNSGR	[7] Phospho (STY)	67.5189	5.13636	KLPLVDNSGRLSGLI	S	194	3768.54	4224.36	3125.83	3294.75	1762.33	1883.08	18281.3	20215.3	16183.1	16330.8	3882.12	4057.5	4003.02	4034.33	8215.74
862	646.617	3	1936.83	49.1345	0.9686	3.39335	A0A0H3BZL9	PTS system, fructose-specific IIABC component OS=Streptococcus pyogenes serotype M49 (strain NZ131) OX=471876 GN=fruA PE=4	EEQTSTGLGDGIAMPHSK	EEQTSTGLGDGIAMPHSK	[17] Phospho (STY)	71.16	2.47416	3	100	100	DGIAMPHSKNIVVDK	S	68	EEQTSTGLGDGIAMPHSK	[17] Phospho (STY)	7.293	2.51364	17	DGIAMPHSKNIVVDK	S	68	EEQTSTGLGDGIAMPHSK	[17] Phospho (STY)	73.9793	2.48934	DGIAMPHSKNIVVDK	S	68	5359.1	4979.42	2268.75	2237.17	1698.28	1641.21	10971.4	13321.9	8943.12	9856.63	5634.68	6481.39	4528.72	4007.02	8314.44
863	853.409	2	1704.8	41.3662	0.484317	5.26316	A0A0H3BYA0	PTS system, IIB component, putative OS=Streptococcus pyogenes serotype M49 (strain NZ131) OX=471876 GN=Spy49_1328c PE=4	ILAACGAGVNSSHQIK	ILAACGAGVNSSHQIK	[5] Carbamidomethyl (C)|[12] Phospho (STY)	64.11	0.817787	4	92.8	72.5525	CGAGVNSSHQIKDAI	S	15	ILAACGAGVNSSHQIK	[5] Carbamidomethyl (C)|[12] Phospho (STY)	7.4677	0.803983	2	CGAGVNSSHQIKDAI	S	15								2596.43	3286.79	1951.48	2095.81	1905.87	1736.65	28422.8	27226.8	21158.3	21799.9	2854.41	2991.02	1326.64	1410.99	1449.57
875	874.44	3	2620.3	58.4993	0.422867	4.01662	A0A0H3BXH0	Endolytic murein transglycosylase OS=Streptococcus pyogenes serotype M49 (strain NZ131) OX=471876 GN=mltG PE=3	VVQANELQETASKESQVPLTIEK	VVQANELQETASKESQVPLTIEK	[15] Phospho (STY)	45.21	-0.749347	7	74.15	49.1933	QETASKESQVPLTIE	S	127	VVQANELQETASKESQVPLTIEK	[15] Phospho (STY)	6.3627	-0.720165	6	QETASKESQVPLTIE	S	127	VVQANELQETASKESQVPLTIEK	[15] Phospho (STY)	44.7787	-0.738127	QETASKESQVPLTIE	S	127	7263.61	6906.89	2225.51	2477.39	2178.21	1985.1	6874.82	6676.67	3617.36	3341.4	4937.84	4510.78	7967.9	8609.09	7053.08
890	742.028	3	2223.06	84.7561	0.7097	3.73961	A0A0H3BZL9	PTS system, fructose-specific IIABC component OS=Streptococcus pyogenes serotype M49 (strain NZ131) OX=471876 GN=fruA PE=4	SQELISLILNNEGNTYHAK	SQELISLILNNEGNTYHAK	[6] Phospho (STY)	127.31	1.91909	8	100	99.6788	KKSQELISLILNNEG	S	257	SQELISLILNNEGNTYHAK	[6] Phospho (STY)	7.2218	1.90851	13	KKSQELISLILNNEG	S	257	SQELISLILNNEGNTYHAK	[6] Phospho (STY)	77.0289	1.9773	KKSQELISLILNNEG	S	257	876.615	835.096	1407.97	997.013	511.069	264.908	23906.4	22904.2	28267	28742.6	835.628	927.617	4432.12	3764.7	6087.75
893	594.77	2	1187.53	31.7022	0.750617	3.3241	A0A0H3C124	Putative mannose-specific phosphotransferase system component IID OS=Streptococcus pyogenes serotype M49 (strain NZ131) OX=471876 GN=manN PE=4	KLYTSPEDR	KLYTSPEDR	[5] Phospho (STY)	54.62	3.06059	8	94.99	81.5962	ALKKLYTSPEDRATA	S	50	KLYTSPEDR	[5] Phospho (STY)	6.9738	3.04077	3	ALKKLYTSPEDRATA	S	50	KLYTSPEDR	[5] Phospho (STY)	79.0564	3.10516	ALKKLYTSPEDRATA	S	50	2020.67	2196.52	1714.59	1768.91	888.191	843.944	13855.2	13961.8	20148.8	21080.1	2892.64	3362.29	3145.7	3168.84	11332.4
897	603.966	3	1808.88	44.8176	0.96855	3.11634	A0A0H3BZD6	Putative PTS system enzyme II OS=Streptococcus pyogenes serotype M49 (strain NZ131) OX=471876 GN=Spy49_1737c PE=4	LPETPVSDAPVATAPHK	LPETPVSDAPVATAPHK	[4] Phospho (STY)	54.93	2.93254	5	97.36	94.93	DEAKLPETPVSDAPV	T	504	LPETPVSDAPVATAPHK	[4] Phospho (STY)	5.8926	2.97481	3	DEAKLPETPVSDAPV	T	504	LPETPVSDAPVATAPHK	[4] Phospho (STY)	85.461	2.89351	DEAKLPETPVSDAPV	T	504	6667.26	7131.39	2596.92	3272.52	1765.15	1698.02	24293.4	27064.8	35355.8	36337.7	8005.45	8401.45	6502.89	6196.88	7309.47
900	583.772	2	1165.53	23.8325	0.381833	3.11634	B5XJ61	30S ribosomal protein S11 OS=Streptococcus pyogenes serotype M49 (strain NZ131) OX=471876 GN=rpsK PE=3	GPGSGRESAIR	GPGSGRESAIR	[8] Phospho (STY)	33.54	3.73751	2	90.32	85.595	GPGSGRESAIRALAA	S	93					0				GPGSGRESAIR	[8] Phospho (STY)	21.6345	3.78292	GPGSGRESAIRALAA	S	93	493.648	533.824	429.148	394.237	212.78	238.931	7409.57	8230.53	4746.48	4967.3	545.983	505.146	448.586	566.04	6302.15
906	566.26	2	1130.51	48.0095	0.845533	3.11634	A0A0H3BXY9	Isoleucine--tRNA ligase OS=Streptococcus pyogenes serotype M49 (strain NZ131) OX=471876 GN=ileS PE=3	QYALSQVDK	QYALSQVDK	[5] Phospho (STY)	40.83	4.0184	4	99.99	99.9525	MCRQYALSQVDKQRN	S	115					0				QYALSQVDK	[5] Phospho (STY)	83.4839	4.06522	MCRQYALSQVDKQRN	S	115	2803.71	2902.79	2491.41	2510.02	1495.39	1688.02	11565.5	12198.6	20111.8	21904.5	2633.25	2600.08	4059.55	4281.1	6510.45
907	654.822	2	1307.63	65.544	0.545517	3.53186	B5XHZ0	Chaperone protein DnaK OS=Streptococcus pyogenes serotype M49 (strain NZ131) OX=471876 GN=dnaK PE=3	FQLTDIPAAPR	FQLTDIPAAPR	[4] Phospho (STY)	54.37	1.67259	8	100	100	TLGRFQLTDIPAAPR	T	430	FQLTDIPAAPR	[4] Phospho (STY)	8.3441	1.73107	10	TLGRFQLTDIPAAPR	T	430	FQLTDIPAAPR	[4] Phospho (STY)	91.9924	1.71307	TLGRFQLTDIPAAPR	T	430	874.36	911.573	728.579	718.242	328.79	305.789	5753.8	6824.41	16984.4	16178.2	1181.79	1033.21	981.215	1051.17	4940.78
921	442.713	2	883.41	42.6757	0.607117	2.21607	B5XMA2	UDP-N-acetylglucosamine--N-acetylmuramyl-(pentapeptide) pyrophosphoryl-undecaprenol N-acetylglucosamine transferase OS=Streptococcus pyogenes serotype M49 (strain NZ131) OX=471876 GN=murG PE=3	ADISSAIK	ADISSAIK	[4] Phospho (STY)	54.51	5.95007	11	96.89	89.5683	DLLRADISSAIKEK-	S	354					0				ADISSAIK	[4] Phospho (STY)	97.1249	5.89679	DLLRADISSAIKEK-	S	354	2054.42	2228.76	2403.72	2623.69	2009.13	2023.5	5764.35	5974.32	6538.99	6571.16	3344.47	3431.61	2715.93	2398.1	2526.36
927	542.6	3	1624.78	33.1958	0.443133	2.70083	A0A0H3C1S0	CsbD domain-containing protein OS=Streptococcus pyogenes serotype M49 (strain NZ131) OX=471876 GN=Spy49_1665c PE=3	EGAGKLTGDKELEAK	EGAGKLTGDKELEAK	[7] Phospho (STY)	40.3	4.89697	3	100	100	KEGAGKLTGDKELEA	T	25	EGAGKLTGDKELEAK	[7] Phospho (STY)	6.8807	4.88249	5	KEGAGKLTGDKELEA	T	25	EGAGKLTGDKELEAK	[7] Phospho (STY)	24.4076	4.85352	KEGAGKLTGDKELEA	T	25	2308.77	2792.75	1087.41	1101.08	547.397	578.186	5663.96	6268.63	1642.59	1804.59	3440.4	3266.08	4149.83	4182.53	14142.9
933	854.393	3	2560.16	57.7559	0.68905	4.15512	A0A0H3BYW2	EIICB-Lac OS=Streptococcus pyogenes serotype M49 (strain NZ131) OX=471876 GN=lacE PE=4	VYDEQILAEEAAGTNSSDALKEK	VYDEQILAEEAAGTNSSDALKEK	[17] Phospho (STY)	44.32	-0.820428	6	42.94	34.9317	EAAGTNSSDALKEKV	S	428	VYDEQILAEEAAGTNSSDALKEK	[16] Phospho (STY)	6.8132	-0.82962	2	EEAAGTNSSDALKEK	S	427	VYDEQILAEEAAGTNSSDALKEK	[16] Phospho (STY)	44.2963	-0.808944	EEAAGTNSSDALKEK	S	427	3206.14	2856.43	1015.37	1014.94	583.486	659.877	28611.9	29112	25118.4	25142.8	1476.08	1513.61	2082.61	2234.11	1019.01
936	651.948	3	1952.82	40.8	0.845667	3.53186	A0A0H3BZL9	PTS system, fructose-specific IIABC component OS=Streptococcus pyogenes serotype M49 (strain NZ131) OX=471876 GN=fruA PE=4	EEQTSTGLGDGIAMPHSK					0						EEQTSTGLGDGIAMPHSK	[4] Phospho (STY)|[14] Oxidation (M)	7.0293	1.64731	7	IMTREEQTSTGLGDG	T	55	EEQTSTGLGDGIAMPHSK	[6] Phospho (STY)|[14] Oxidation (M)	49.7741	1.67442	TREEQTSTGLGDGIA	T	57	8869.9	9758.67	3377.56	3713.16	2612.25	2821.11	25899.6	26617.7	10013.5	9245.86	12888.7	14115.9	9001.73	8974.89	11562.9
941	636.287	3	1905.84	51.945	0.82515	2.97784	B5XKM7	Enolase OS=Streptococcus pyogenes serotype M49 (strain NZ131) OX=471876 GN=eno PE=3	GMVPSGASTGEHEAVELR	GMVPSGASTGEHEAVELR	[8] Phospho (STY)	120.88	5.89156	4	98.7	91.755	GMVPSGASTGEHEAV	S	42	GMVPSGASTGEHEAVELR	[8] Phospho (STY)	7.962	5.93168	9	GMVPSGASTGEHEAV	S	42	GMVPSGASTGEHEAVELR	[8] Phospho (STY)	32.0772	5.85452	GMVPSGASTGEHEAV	S	42	1930.85	1548.75	682.487	858.442	305.118	430.731	6857.82	7435.47	10069.9	10348.9	1469.68	1413.89	3073.52	3381.54	37508.1
943	1190.04	2	2378.07	43.3238	0.5048	6.6482	B5XI23	Protein translocase subunit SecA OS=Streptococcus pyogenes serotype M49 (strain NZ131) OX=471876 GN=secA PE=3	ATTAAPQNIQSQQSANTDDLPK	ATTAAPQNIQSQQSANTDDLPK	[17] Phospho (STY)	67.94	-0.566598	13	99.4	84.4562	QSQQSANTDDLPKVE	T	809	ATTAAPQNIQSQQSANTDDLPK	[17] Phospho (STY)	7.6441	-0.576494	20	QSQQSANTDDLPKVE	T	809	ATTAAPQNIQSQQSANTDDLPK	[17] Phospho (STY)	41.2529	-0.596286	QSQQSANTDDLPKVE	T	809	10548.2	11766.8	8149.87	8121.2	9559.64	8823.56	4821.54	4268.77	1191.1	1186.86	13080.4	12666.7	19145.2	20242.1	10579.2
952	494.743	2	987.472	44.9815	0.74315	2.83934	B5XMJ7	Cell cycle protein GpsB OS=Streptococcus pyogenes serotype M49 (strain NZ131) OX=471876 GN=gpsB PE=3	TSIIYSPK	TSIIYSPK	[2] Phospho (STY)	39.46	4.01942	3	66.88	55.6267	-----MTSIIYSPKD	S	3					0				TSIIYSPK	[2] Phospho (STY)	71.8297	3.97176	-----MTSIIYSPKD	S	3	3945.46	4390.23	3491.07	3797.66	2885.54	2996.15	11390.4	12593.7	12440.4	13780.9	5480.96	5670.98	5423.19	5158.23	3448.04
953	756.318	3	2265.93	50.9355	0.873517	3.1856	A0A0H3BZ03	R3H domain protein OS=Streptococcus pyogenes serotype M49 (strain NZ131) OX=471876 GN=Spy49_0209 PE=4	VLESGQDYTMDPMSNSERK	VLESGQDYTMDPMSNSERK	[16] Phospho (STY)	52.95	1.26776	8	86.93	61.119	TMDPMSNSERKIVHK	S	270	VLESGQDYTMDPMSNSERK	[16] Phospho (STY)	7.4011	1.25737	7	TMDPMSNSERKIVHK	S	270	VLESGQDYTMDPMSNSERK	[16] Phospho (STY)	37.9677	1.28073	TMDPMSNSERKIVHK	S	270	4384.46	3787.97	1994.4	2519.45	1567.36	1102.59	23436.7	25392.8	21496.8	22482.6	4741.41	4585.07	4050.12	3871.1	7467.21
954	581.261	2	1160.51	40.2338	1.22732	2.90859	B5XJ99	30S ribosomal protein S4 OS=Streptococcus pyogenes serotype M49 (strain NZ131) OX=471876 GN=rpsD PE=3	SRYTGPSWK					0										0				SRYTGPSWK	[1] Phospho (STY)	77.0224	4.1792	------MSRYTGPSW	S	2	4584.48	4725.45	5069.45	5262.12	2295.32	2201.23	9700.64	9554.3	6965.06	7407.11	4126.55	3860.02	4105.43	4122.5	6717.72
957	706.84	2	1411.67	39.5932	0.627533	3.87812	A0A0H3BWF1	Protein translocase subunit SecY OS=Streptococcus pyogenes serotype M49 (strain NZ131) OX=471876 GN=secY PE=3	NSSYIPSVRPGR	NSSYIPSVRPGR	[4] Phospho (STY)	53.83	3.54035	3	100	99.94	NLQKNSSYIPSVRPG	Y	347					0				NSSYIPSVRPGR	[4] Phospho (STY)	67.3812	3.56118	NLQKNSSYIPSVRPG	Y	347	850.64	958.112	622.453	656.505	249.73	310.92	3871.58	3891.69	4583.43	4855.87	1182.75	1083.98	1510.09	1636.9	864.074
965	682.348	2	1362.68	68.2722	0.54565	3.73961	B5XJ35	30S ribosomal protein S10 OS=Streptococcus pyogenes serotype M49 (strain NZ131) OX=471876 GN=rpsJ PE=3	LDLPSGVNVEIK	LDLPSGVNVEIK	[5] Phospho (STY)	59.67	1.86633	6	100	100	LMKLDLPSGVNVEIK	S	94	LDLPSGVNVEIK	[5] Phospho (STY)	7.0645	1.92244	7	LMKLDLPSGVNVEIK	S	94	LDLPSGVNVEIK	[5] Phospho (STY)	81.3396	1.83179	LMKLDLPSGVNVEIK	S	94	145.778	165.892	111.056	127.332	50.3817	93.2598	7389.97	7325.7	18011.2	19720.9	258.076	380.309	483.288	500.258	11223.4
970	529.256	2	1056.5	68.1084	0.661133	2.83934	B5XIG1	Trigger factor OS=Streptococcus pyogenes serotype M49 (strain NZ131) OX=471876 GN=tig PE=3	SLLSADMLK	SLLSADMLK	[1] Phospho (STY)	55.65	4.1342	14	99.96	99.6613	MPADQVRSLLSADML	S	400	SLLSADMLK	[1] Phospho (STY)	7.6231	4.11193	6	MPADQVRSLLSADML	S	400	SLLSADMLK	[1] Phospho (STY)	95.6384	4.08965	MPADQVRSLLSADML	S	400	1398.78	1407.25	1091.45	930.932	467.83	491.599	9998.57	10960.7	15386.9	19291.3	1194.29	1294.06	1630.57	1492.5	4493.35
971	765.683	3	2294.03	54.4481	0.771083	3.94737	A0A0H3BZC7	EIIAB-Man OS=Streptococcus pyogenes serotype M49 (strain NZ131) OX=471876 GN=manL PE=4	AVEGGVEINELNVGSMAHSTGK	AVEGGVEINELNVGSMAHSTGK	[16] Oxidation (M)|[20] Phospho (STY)	39.45	1.03239	4	47.9	36.9725	VGSMAHSTGKTMVNN	T	278					0				AVEGGVEINELNVGSMAHSTGK	[16] Oxidation (M)|[20] Phospho (STY)	33.7672	1.00162	VGSMAHSTGKTMVNN	T	278	3507.59	3877.26	1588.91	1791.01	1493.48	1520.56	18209.6	16628.3	21406.8	19517.5	3459.84	3508.36	5697.42	5588.66	16651.9
974	466.228	3	1395.66	38.6452	0.689117	2.07756	B5XKR6	30S ribosomal protein S21 OS=Streptococcus pyogenes serotype M49 (strain NZ131) OX=471876 GN=rpsU PE=3	KNESLDDALRR	KNESLDDALRR	[4] Phospho (STY)	53.53	8.82744	9	100	100	TVVRKNESLDDALRR	S	11					0				KNESLDDALRR	[4] Phospho (STY)	50.9685	8.77685	TVVRKNESLDDALRR	S	11	986.26	879.397	249.573	275.15	110.068	63.2017	5484.58	5866.23	3937.83	4709.53	405.07	362.014	804.177	750.406	15407.3
975	537.731	2	1073.45	23.0819	0.50475	2.83934	A0A0H3BYQ9	PTS system, IIB component OS=Streptococcus pyogenes serotype M49 (strain NZ131) OX=471876 GN=Spy49_0834 PE=4	FDKSDPASK	FDKSDPASK	[4] Phospho (STY)	76.21	4.90647	13	100	99.7838	NVGRFDKSDPASKVK	S	112	FDKSDPASK	[4] Phospho (STY)	6.9695	4.88454	2	NVGRFDKSDPASKVK	S	112	FDKSDPASK	[4] Phospho (STY)	72.2267	4.86262	NVGRFDKSDPASKVK	S	112	2628.11	2807.62	2094.69	2254.16	1585.08	1788.05	24723.8	24628.2	13302.6	14899.5	2141.09	2072.28	1078.76	1185.73	1703.21
976	642.317	2	1282.62	56.0369	0.750617	3.4626	B5XMC3	Arginine deiminase OS=Streptococcus pyogenes serotype M49 (strain NZ131) OX=471876 GN=arcA PE=3	NTITNAILESK	NTITNAILESK	[10] Phospho (STY)	46.03	1.20282	7	99.99	99.7336	ITNAILESKGLKLIK	S	379	NTITNAILESK	[10] Phospho (STY)	8.0186	1.26243	9	ITNAILESKGLKLIK	S	379	NTITNAILESK	[10] Phospho (STY)	88.0252	1.16612	ITNAILESKGLKLIK	S	379	1599.38	1821.05	836.857	1064.67	425.473	500.265	8057.72	8349.43	18152.3	18052.3	1815.38	1880.33	2223.1	1981.22	1963.14
983	750.826	4	2999.27	68.6335	0.620267	3.80886	A0A0H3BZC1	Uncharacterized protein OS=Streptococcus pyogenes serotype M49 (strain NZ131) OX=471876 GN=Spy49_0377 PE=4	METFESDDAVDFDTKVMTLPEKDEK	METFESDDAVDFDTKVMTLPEKDEK	[14] Phospho (STY)	58.56	1.43153	9	98.96	80.3111	DDAVDFDTKVMTLPE	T	30					0				METFESDDAVDFDTKVMTLPEKDEK	[14] Phospho (STY)	62.0262	1.43349	DDAVDFDTKVMTLPE	T	30	10478.3	9178.91	5195.84	3629.36	5073.87	3351.37	1863.26	2213.71	580.883	604.405	6595.28	4362.87	33485	30889.9	16736.7
992	675.844	2	1349.67	61.3305	0.606967	3.4626	A0A0H3BVE1	30S ribosomal protein S5 OS=Streptococcus pyogenes serotype M49 (strain NZ131) OX=471876 GN=rpsE PE=3	SLGSNTPINIVR	SLGSNTPINIVR	[1] Phospho (STY)	87.82	2.53722	10	99.89	95.4936	VADITSKSLGSNTPI	S	126	SLGSNTPINIVR	[1] Phospho (STY)	7.8594	2.51979	7	VADITSKSLGSNTPI	S	126	SLGSNTPINIVR	[1] Phospho (STY)	89.8269	2.50235	VADITSKSLGSNTPI	S	126	670.016	752.318	693.536	834.952	360.093	357.263	3679.61	3728.12	9700.83	10430.8	1012.81	1114.41	1389.73	1644.23	5528.65
994	651.643	3	1951.91	44.7767	0.402333	3.25485	A0A0H3BXD5	30S ribosomal protein S12 OS=Streptococcus pyogenes serotype M49 (strain NZ131) OX=471876 GN=rpsL PE=3	IEKSDSPALNIGYNSHK	IEKSDSPALNIGYNSHK	[6] Phospho (STY)	66.73	2.15552	3	50	50	SKIEKSDSPALNIGY	S	39	IEKSDSPALNIGYNSHK	[4] Phospho (STY)	7.1618	2.14346	6	RKSKIEKSDSPALNI	S	37	IEKSDSPALNIGYNSHK	[4] Phospho (STY)	79.1471	2.22182	RKSKIEKSDSPALNI	S	37	467.186	471.788	101.987	76.8076	33.9549	16.7634	3088.75	3007.85	2085.98	2007.7	216.275	132.472	719.435	606.401	4620.58
997	629.283	2	1256.55	45.5067	0.64805	3.3241	B5XIW7	Chaperonin GroEL OS=Streptococcus pyogenes serotype M49 (strain NZ131) OX=471876 GN=groEL PE=3	DATMTALGQAAK	DATMTALGQAAK	[3] Phospho (STY)	67.81	2.96811	10	99.98	99.5558	GLELKDATMTALGQA	T	311	DATMTALGQAAK	[3] Phospho (STY)	8.2154	3.02896	14	GLELKDATMTALGQA	T	311	DATMTALGQAAK	[3] Phospho (STY)	68.8648	2.93065	GLELKDATMTALGQA	T	311	784.768	853.959	722.247	780.503	325.116	384.346	5737.66	5819.33	16668.1	18964.7	1258.33	1178.64	914.553	932.578	11106.9
1001	993.396	2	1984.78	55.3143	0.75065	5.40166	A0A0H3BZC1	Uncharacterized protein OS=Streptococcus pyogenes serotype M49 (strain NZ131) OX=471876 GN=Spy49_0377 PE=4	RMETFESDDAVDFDTK	RMETFESDDAVDFDTK	[15] Phospho (STY)	86.62	0.206491	15	100	99.9659	DDAVDFDTKVMTLPE	T	30					0				RMETFESDDAVDFDTK	[15] Phospho (STY)	49.316	0.271688	DDAVDFDTKVMTLPE	T	30	15452.3	13216.2	11220.5	10719.9	12560.1	10704.3	1746.09	1506.65	322.589	281.078	9766.29	8063.47	20798.2	20663.1	6165.37
1003	686.825	2	1371.64	55.2938	1.25538	3.67036	P0C096	Protein RecA OS=Streptococcus pyogenes serotype M49 (strain NZ131) OX=471876 GN=recA PE=3	IIEIYGPESSGK	IIEIYGPESSGK	[9] Phospho (STY)	57	2.66195	3	50	49.995	IEIYGPESSGKTTVA	S	82	IIEIYGPESSGK	[9] Phospho (STY)	6.3686	2.64479	2	IEIYGPESSGKTTVA	S	82	IIEIYGPESSGK	[9] Phospho (STY)	78.0649	2.70054	IEIYGPESSGKTTVA	S	82	2007.4	1741.09	1543.81	1674.55	607.634	715.238	15007.2	15384.1	20361.1	22071.2	2133.3	2399.39	2893.28	2635.79	6661.55
1004	570.239	2	1138.46	51.945	0.586783	2.97784	A0A0H3BYL1	Pyruvate kinase OS=Streptococcus pyogenes serotype M49 (strain NZ131) OX=471876 GN=pyk PE=3	EFSYVTGEK					0										0				EFSYVTGEK	[3] Phospho (STY)	73.0088	4.67502	ADDAKEFSYVTGEKI	S	107	1057.53	1019.2	796.645	983.44	483.692	624.032	8287.78	8934.43	17082.9	16665.3	1814.29	1814.53	1627.64	1691.1	7158.74
1005	719.356	3	2155.05	67.2217	0.58665	3.1856	B5XJ57	Adenylate kinase OS=Streptococcus pyogenes serotype M49 (strain NZ131) OX=471876 GN=adk PE=3	SYIDKGELVPDEVTNGIVK					0						SYIDKGELVPDEVTNGIVK	[1] Phospho (STY)	6.8857	0.135794	6	EMGRLAKSYIDKGEL	S	51	SYIDKGELVPDEVTNGIVK	[1] Phospho (STY)	72.4643	0.113954	EMGRLAKSYIDKGEL	S	51	3341.42	4916.66	1078.22	3564.92	796.689	6431.6	11864.3	13862.8	14471.7	16171.6	1360.47	1130.29	1059.16	1057.64	6565.17
1007	803.357	2	1604.7	47.5867	0.784017	4.15512	B5XL08	Phosphopentomutase OS=Streptococcus pyogenes serotype M49 (strain NZ131) OX=471876 GN=deoB PE=3	TISTEDNPTGYVTK	TISTEDNPTGYVTK	[3] Phospho (STY)	98.12	0.952038	5	94.43	83.504	PIPLKTISTEDNPTG	S	71	TISTEDNPTGYVTK	[3] Phospho (STY)	7.2186	0.99969	7	PIPLKTISTEDNPTG	S	71	TISTEDNPTGYVTK	[4] Phospho (STY)	70.3267	0.985025	IPLKTISTEDNPTGY	T	72	2785.14	3049.92	2024.68	2013.93	922.771	998.273	20986.5	20798.3	44024.8	45331.5	3450.27	3637.28	2608.71	2722.6	8219.03
1014	714.834	2	1427.65	46.0523	0.4638	3.94737	A0A0H3BZ43	Uncharacterized protein OS=Streptococcus pyogenes serotype M49 (strain NZ131) OX=471876 GN=Spy49_1003c PE=3	VSLQDKVSDMAR	VSLQDKVSDMAR	[8] Phospho (STY)	53.57	4.03322	12	100	98.682	VSLQDKVSDMARSTF	S	141	VSLQDKVSDMAR	[8] Phospho (STY)	6.8546	4.08678	7	VSLQDKVSDMARSTF	S	141	VSLQDKVSDMAR	[8] Phospho (STY)	71.7244	4.00025	VSLQDKVSDMARSTF	S	141	1961.31	2089.69	1348.79	1218.1	521.807	490.97	11113.7	10747.5	13752.2	13397.4	1605.94	1432.37	2415.7	2468.82	6060.91
1017	570.936	3	1709.79	41.6326	0.845483	2.56233	A0A0H3BXD5	30S ribosomal protein S12 OS=Streptococcus pyogenes serotype M49 (strain NZ131) OX=471876 GN=rpsL PE=3	SDSPALNIGYNSHKK	SDSPALNIGYNSHKK	[12] Phospho (STY)	77.34	5.1201	3	100	99.9667	ALNIGYNSHKKVQTK	S	48	SDSPALNIGYNSHKK	[12] Phospho (STY)	7.1075	5.10633	2	ALNIGYNSHKKVQTK	S	48								3647.34	3475.48	2058.89	2568.89	929.762	1116.19	5703.26	5828.3	3375.94	5644.77	8018.83	8178.13	13738.1	12143.6	19612.1
1021	553.949	3	1658.83	53.4796	0.58685	2.70083	A0A0H3BZC7	EIIAB-Man OS=Streptococcus pyogenes serotype M49 (strain NZ131) OX=471876 GN=manL PE=4	LLHGQVATAWTPASK	LLHGQVATAWTPASK	[8] Phospho (STY)	65.01	4.2805	8	99.95	99.3612	LLHGQVATAWTPASK	T	186	LLHGQVATAWTPASK	[8] Phospho (STY)	8.0883	4.26631	22	LLHGQVATAWTPASK	T	186	LLHGQVATAWTPASK	[8] Phospho (STY)	53.0177	4.35851	LLHGQVATAWTPASK	T	186	4665.92	4948.16	1181.12	1306.62	1203.11	1510.92	5022.58	6889.77	3201.09	4196.84	1380.4	1499.19	3280.94	3214.85	16686.4
1022	652.639	3	1954.9	51.6786	0.48425	3.11634	A0A0H3BZL9	PTS system, fructose-specific IIABC component OS=Streptococcus pyogenes serotype M49 (strain NZ131) OX=471876 GN=fruA PE=4	SETAVSTEKTSLGGAFYK					0						SETAVSTEKTSLGGAFYK	[10] Phospho (STY)	6.5866	1.68615	3	TAVSTEKTSLGGAFY	T	283								1775.29	1791.45	450.327	424.411	292.218	350.774	3449.82	3655.92	3318.99	3409.86	1580.17	1821.88	2664.92	2503.88	1577.21
1025	697.799	2	1393.58	58.2402	0.763617	3.87812	A0A0H3BZ76	Putative phosphoprotein phosphatase (PppL protein) OS=Streptococcus pyogenes serotype M49 (strain NZ131) OX=471876 GN=pppL PE=4	IYDLGQSEDFK	IYDLGQSEDFK	[7] Phospho (STY)	53.16	2.63453	10	100	99.983	RIYDLGQSEDFKGMG	S	91	IYDLGQSEDFK	[7] Phospho (STY)	7.1518	2.6894	8	RIYDLGQSEDFKGMG	S	91	IYDLGQSEDFK	[7] Phospho (STY)	85.4503	2.67251	RIYDLGQSEDFKGMG	S	91	1030.43	1079.53	1085.24	1126.14	524.201	651.36	13333.4	13868.4	27889.3	29048.2	1670.53	1839.09	1360.72	1501.57	5432.35
1041	616.295	2	1230.58	43.0033	0.750767	3.25485	B5XLE2	50S ribosomal protein L10 OS=Streptococcus pyogenes serotype M49 (strain NZ131) OX=471876 GN=rplJ PE=3	SLRESGVEFK	SLRESGVEFK	[5] Phospho (STY)	47.85	8.60942	2	99.71	93.44	LRRSLRESGVEFKVI	S	49					0				SLRESGVEFK	[5] Phospho (STY)	74.5666	8.65243	LRRSLRESGVEFKVI	S	49	743.47	561.473	637.464	607.953	213.791	247.483	2623.8	2584.85	2697.43	2997.77	932.973	877.323	1042.42	1168.32	2424.43
1048	793.699	3	2378.07	43.931	1.1252	3.67036	B5XI23	Protein translocase subunit SecA OS=Streptococcus pyogenes serotype M49 (strain NZ131) OX=471876 GN=secA PE=3	ATTAAPQNIQSQQSANTDDLPK	ATTAAPQNIQSQQSANTDDLPK	[14] Phospho (STY)	48.69	-0.262703	4	96.64	83.8825	QNIQSQQSANTDDLP	S	806	ATTAAPQNIQSQQSANTDDLPK	[14] Phospho (STY)	6.964	-0.272599	13	QNIQSQQSANTDDLP	S	806	ATTAAPQNIQSQQSANTDDLPK	[2] Phospho (STY)	70.8846	-0.29239	ERASQRATTAAPQNI	T	794	11671.5	12614.9	3549.76	3841.58	3724.31	4189.56	24618	27286.7	13244.4	14870.8	12306.7	12157	13897.3	13197.9	15905.6
1055	983.937	2	1965.86	43.0033	0.5048	5.47091	A0A0H3BXI0	Uncharacterized protein OS=Streptococcus pyogenes serotype M49 (strain NZ131) OX=471876 GN=Spy49_1001c PE=3	VTSAASSTSQFVSEQTEK	VTSAASSTSQFVSEQTEK	[13] Phospho (STY)	90.98	1.38308	7	99.96	97.8243	SSTSQFVSEQTEKLK	S	141	VTSAASSTSQFVSEQTEK	[13] Phospho (STY)	8.2284	1.37111	12	SSTSQFVSEQTEKLK	S	141	VTSAASSTSQFVSEQTEK	[13] Phospho (STY)	37	1.35914	SSTSQFVSEQTEKLK	S	141	685.499	840.937	471.903	555.825	238.051	260.777	16771.7	16597.7	16421.8	16838.4	1084.47	1014.73	718.308	579.283	2313.85
1058	879.386	2	1756.76	43.7877	0.50475	5.95568	A0A0H3BYW2	EIICB-Lac OS=Streptococcus pyogenes serotype M49 (strain NZ131) OX=471876 GN=lacE PE=4	EYGAPVTAAAGSYGAHR	EYGAPVTAAAGSYGAHR	[12] Phospho (STY)	86.21	0.0474454	8	100	99.5989	PVTAAAGSYGAHREI	S	499	EYGAPVTAAAGSYGAHR	[12] Phospho (STY)	6.7528	0.0340497	6	PVTAAAGSYGAHREI	S	499	EYGAPVTAAAGSYGAHR	[12] Phospho (STY)	80.2153	0.121104	PVTAAAGSYGAHREI	S	499	870.491	1040.67	684.915	632.585	445.758	425.995	20753.5	18799.9	22323.8	22205.3	1317.97	1239.34	680.529	765.085	569.122
1060	530.894	3	1589.66	34.5463	0.389233	2.14681	A0A0H3BZR7	Mid-cell-anchored protein Z OS=Streptococcus pyogenes serotype M49 (strain NZ131) OX=471876 GN=mapZ PE=3	DQFLSEDSHHPAK	DQFLSEDSHHPAK	[8] Phospho (STY)	41.7	6.08808	3	99.28	97.77	DQFLSEDSHHPAKQN	S	167	DQFLSEDSHHPAK	[8] Phospho (STY)	7.4093	6.07328	5	DQFLSEDSHHPAKQN	S	167								5195.42	5296.04	1904.13	1917.33	1007.72	1097.54	11113.1	12264.3	7855.51	8641.47	3481.63	3826.07	6186.26	6815.8	5884.28
1064	541.268	3	1620.78	54.8095	0.77115	2.90859	A0A0H3C0A4	Phosphate transport ATP-binding protein pstB OS=Streptococcus pyogenes serotype M49 (strain NZ131) OX=471876 GN=pstB PE=4	DKSILDHAVESSLK					0										0				DKSILDHAVESSLK	[3] Phospho (STY)	45.5249	4.10553	LKGIRDKSILDHAVE	S	119	1271.65	1248.55	606.784	536.256	138.56	195.189	9274.48	9736.23	7547.32	7986.09	671.911	610.058	1218.05	1342.17	2182.94
1067	830.417	2	1658.82	53.4796	0.484267	4.57064	A0A0H3BZC7	EIIAB-Man OS=Streptococcus pyogenes serotype M49 (strain NZ131) OX=471876 GN=manL PE=4	LLHGQVATAWTPASK	LLHGQVATAWTPASK	[8] Phospho (STY)	65.01	0.788914	8	99.91	99.355	LLHGQVATAWTPASK	T	186	LLHGQVATAWTPASK	[8] Phospho (STY)	8.0883	0.774727	22	LLHGQVATAWTPASK	T	186	LLHGQVATAWTPASK	[8] Phospho (STY)	39.8809	0.866922	LLHGQVATAWTPASK	T	186	2280.19	2487.29	1858.89	1986.27	2090.97	1564.88	8010.2	8122.69	4421.13	4749.65	1018.61	907.49	2403.96	2118.92	16480.4
1071	474.243	2	946.471	43.1059	0.709567	2.49307	B5XKI1	Elongation factor Tu OS=Streptococcus pyogenes serotype M49 (strain NZ131) OX=471876 GN=tuf PE=3	EHILLSR					0										0				EHILLSR	[6] Phospho (STY)	92.0438	7.79426	TREHILLSRQVGVKH	S	126	1172.57	1408.15	650.647	708.254	466.919	473.668	8947.85	9210.95	14932.4	15269	658.118	600.991	1099.34	1118.45	6684.56
1080	748.854	2	1495.69	35.0714	0.5661	4.08587	A0A0H3BXH0	Endolytic murein transglycosylase OS=Streptococcus pyogenes serotype M49 (strain NZ131) OX=471876 GN=mltG PE=3	VVQANELQETASK	VVQANELQETASK	[10] Phospho (STY)	64.58	1.15021	6	99.02	91.45	QANELQETASKESQV	T	122	VVQANELQETASK	[10] Phospho (STY)	6.5825	1.13448	8	QANELQETASKESQV	T	122	VVQANELQETASK	[10] Phospho (STY)	49.1737	1.1856	QANELQETASKESQV	T	122	5418.39	5538.28	1554.76	1576.46	3084.47	3205.79	1500.11	1576.2	594.087	682.451	4507.29	5268.95	7903.2	8838.26	21938.3
1082	773.384	2	1544.75	58.9704	0.668583	4.22438	B5XJ99	30S ribosomal protein S4 OS=Streptococcus pyogenes serotype M49 (strain NZ131) OX=471876 GN=rpsD PE=3	SKLSEYGLQLAEK	SKLSEYGLQLAEK	[4] Phospho (STY)	79.21	3.49046	4	99.88	92.8775	PNNRSKLSEYGLQLA	S	45	SKLSEYGLQLAEK	[4] Phospho (STY)	6.9026	3.47523	3	PNNRSKLSEYGLQLA	S	45	SKLSEYGLQLAEK	[4] Phospho (STY)	79.6829	3.52473	PNNRSKLSEYGLQLA	S	45	253.938	165.056	118.154	131.321	35.9607	15.0986	1881.02	1605.39	4205.38	3908.76	134.94	108.271	417.682	332.238	3792.06
1092	534.263	2	1066.51	41.6867	0.504783	2.97784	B5XKP7	ATP synthase subunit b OS=Streptococcus pyogenes serotype M49 (strain NZ131) OX=471876 GN=atpF PE=3	LSAQQLEAK	LSAQQLEAK	[2] Phospho (STY)	53.27	4.5385	5	100	100	QAEQSRLSAQQLEAK	S	58	LSAQQLEAK	[2] Phospho (STY)	7.2067	4.6102	5	QAEQSRLSAQQLEAK	S	58	LSAQQLEAK	[2] Phospho (STY)	75.2733	4.49437	QAEQSRLSAQQLEAK	S	58	1718.05	1767.59	1518.31	1702.1	915.304	1161.09	9289.96	9254.23	15571.5	18297.9	2520.34	2580.14	2592.56	2584.33	3033.88
1098	527.75	2	1053.49	37.7513	0.361233	2.63158	A0A0H3BZC9	Uridylate kinase OS=Streptococcus pyogenes serotype M49 (strain NZ131) OX=471876 GN=pyrH PE=3	LSGEALAGEK	LSGEALAGEK	[2] Phospho (STY)	59.32	11.2987	9	100	100	QRILIKLSGEALAGE	S	13					0											607.066	713.504	636.478	814.4	564.029	506.471	4696.87	5719.95	7893.84	8707.85	1209.63	1128.97	3046.43	3429.47	13328.5
1104	640.302	2	1278.59	49.278	0.42285	3.67036	B5XHX4	Serine--tRNA ligase OS=Streptococcus pyogenes serotype M49 (strain NZ131) OX=471876 GN=serS PE=3	GVSEDTLTHLK	GVSEDTLTHLK	[3] Phospho (STY)	69.39	2.39361	7	99.99	98.4557	KLKKRGVSEDTLTHL	S	24	GVSEDTLTHLK	[3] Phospho (STY)	7.066	2.45341	9	KLKKRGVSEDTLTHL	S	24								1007.8	955.782	620.704	659.519	245.435	344.718	8499.03	7167.35	14349.2	14348.1	842.505	831.949	1201.16	1097.32	9020.8
1112	770.014	3	2307.02	47.5048	0.484217	4.22438	A0A0H3BZ23	Cell division protein FtsZ OS=Streptococcus pyogenes serotype M49 (strain NZ131) OX=471876 GN=ftsZ PE=3	TFTQTNAQQVAGAQYASDQAK	TFTQTNAQQVAGAQYASDQAK	[5] Phospho (STY)	101.17	1.07025	14	86.66	40.4206	QPRTFTQTNAQQVAG	T	336	TFTQTNAQQVAGAQYASDQAK	[5] Phospho (STY)	8.2799	1.1034	7	QPRTFTQTNAQQVAG	T	336	TFTQTNAQQVAGAQYASDQAK	[5] Phospho (STY)	49.293	1.083	QPRTFTQTNAQQVAG	T	336	8955.71	9349.83	1504.17	1805.65	2648.22	3044.36	4778.74	5616.1	3133.07	3518.26	8283.61	8728.12	11592	11414	16138.5
1114	951.939	2	1901.86	48.7116	0.422867	5.12465	B5XKG9	Lysine--tRNA ligase OS=Streptococcus pyogenes serotype M49 (strain NZ131) OX=471876 GN=lysS PE=3	SNQHIEELNDQQIVR	SNQHIEELNDQQIVR	[1] Phospho (STY)	104.93	-0.0586618	23	100	100	------MSNQHIEEL	S	2	SNQHIEELNDQQIVR	[1] Phospho (STY)	7.2231	-0.0710355	26	------MSNQHIEEL	S	2	SNQHIEELNDQQIVR	[1] Phospho (STY)	36.34	-0.0957829	------MSNQHIEEL	S	2	7063.25	7143.39	8051.62	7912.94	6048.11	5024.7	21895.9	18569.9	8223.34	7160.97	6286.49	5298.3	6095.62	5648.68	3171.25
1117	592.285	2	1182.56	31.3744	0.443283	3.11634	A0A0H3C1S0	CsbD domain-containing protein OS=Streptococcus pyogenes serotype M49 (strain NZ131) OX=471876 GN=Spy49_1665c PE=3	LTGDKELEAK	LTGDKELEAK	[2] Phospho (STY)	40.83	2.32789	2	100	100	KEGAGKLTGDKELEA	T	25					0				LTGDKELEAK	[2] Phospho (STY)	20.1059	2.37265	KEGAGKLTGDKELEA	T	25	1594.06	1776.12	1169.28	1321.3	818.983	924.175	3786.4	3682.84	1759.73	1723.7	3275.57	3624.41	3339.87	3588.7	5792.65
[truncated: 1,167 more rows]
[truncated: 63 more columns]

## Sheet: Exp 3 HDMSE
										Mascot										Ion accounting								Spectral library							Peptide raw abundance
[truncated: 1,382 more rows]
[truncated: 33 more columns]

[truncated: 3 more sheets: Exp 1 DDA, Exp 2 DDA, Exp 3 DDA]
