# Supplementary material for: Dynamic Protein Phosphorylation in Streptococcus pyogenes during Growth, Stationary Phase, and Starvation
Source: Microorganisms. 2024 Mar 20;12(3):621. doi: 10.3390/microorganisms12030621 (PMC10975399; doi:10.3390/microorganisms12030621)
Supplement: Supplementary file 1 [file microorganisms-12-00621-s001.zip › Supplementary Table S3.xlsx]

## Sheet: Legend
Phosphorylation site identification
Column heading	Description
UniProt Acc. No.	UniProtKB Accession of the protein containing the phosphorylation site
Protein name	Name of the protein containing the phosphorylation site
15 AS window	15 amino acid sequence window surrounding the phosphorylation site
Residue	Phosphorylated amino acid
Position	Position of phosphorylation site in the protein sequence
Sum Ident	Number phosphosite identifications by different phosphopeptide ion features
1_DDA	Number of phosphopeptide ion features identified in experiment 1 by DDA data searched with Mascot
1_SL	Number of phosphopeptide ion features identified in experiment 1 by HDMSE data searched against a spectral library
1_MA	Number of phosphopeptide ion features identified in experiment 1 by HDMSE data searched with Mascot
1_IA	Number of phosphopeptide ion features identified in experiment 1 by HDMSE data searched with the ion accounting algorithm
2_DDA	Number of phosphopeptide ion features identified in experiment 2 by DDA data searched with Mascot
2_SL	Number of phosphopeptide ion features identified in experiment 2 by HDMSE data searched against a spectral library
2_MA	Number of phosphopeptide ion features identified in experiment 2 by HDMSE data searched with Mascot
2_IA	Number of phosphopeptide ion features identified in experiment 2 by HDMSE data searched with the ion accounting algorithm
3_DDA	Number of phosphopeptide ion features identified in experiment 3 by DDA data searched with Mascot
3_SL	Number of phosphopeptide ion features identified in experiment 3 by HDMSE data searched against a spectral library
3_MA	Number of phosphopeptide ion features identified in experiment 3 by HDMSE data searched with Mascot
3_IA	Number of phosphopeptide ion features identified in experiment 3 by HDMSE data searched with the ion accounting algorithm

## Sheet: Phosphorylation sites
UniProt Acc. No.	Protein name	15 AS window	Residue	Position	Sum Ident	1_DDA	1_SL	1_MA	1_IA	2_DDA	2_SL	2_MA	2_IA	3_DDA	3_SL	3_MA	3_IA
A0A0H3BVD7	Aldehyde-alcohol dehydrogenase OS=Streptococcus pyogenes serotype M49 (strain NZ131) OX=471876 GN=adhE	KLLGLPASTPEEAVE	S	796	4											2	2
A0A0H3BVD7	Aldehyde-alcohol dehydrogenase OS=Streptococcus pyogenes serotype M49 (strain NZ131) OX=471876 GN=adhE	NAVGDNVSAINLLNI	S	447	2								1				1
A0A0H3BVD7	Aldehyde-alcohol dehydrogenase OS=Streptococcus pyogenes serotype M49 (strain NZ131) OX=471876 GN=adhE	RELAYLAYEDQCSPA	Y	844	2												2
A0A0H3BVE1	30S ribosomal protein S5 OS=Streptococcus pyogenes serotype M49 (strain NZ131) OX=471876 GN=rpsE	ITSKSLGSNTPINIV	S	129	13	1		1	1	2	1	1	1	1	2	1	1
A0A0H3BVE1	30S ribosomal protein S5 OS=Streptococcus pyogenes serotype M49 (strain NZ131) OX=471876 GN=rpsE	LKPAVEGSGVAAGGA	S	102	10				2	2	2		2				2
A0A0H3BVE1	30S ribosomal protein S5 OS=Streptococcus pyogenes serotype M49 (strain NZ131) OX=471876 GN=rpsE	VAALRGISVSDLA--	S	159	10			2				4				3	1
A0A0H3BVE1	30S ribosomal protein S5 OS=Streptococcus pyogenes serotype M49 (strain NZ131) OX=471876 GN=rpsE	VADITSKSLGSNTPI	S	126	8			1	1	1	1	1	1			1	1
A0A0H3BVI6	Putative V-type Na+-ATPase subunit E OS=Streptococcus pyogenes serotype M49 (strain NZ131) OX=471876 GN=ntpE	KTGQKFSSYDCAELR	S	132	5			1				1		1	1	1
A0A0H3BVI6	Putative V-type Na+-ATPase subunit E OS=Streptococcus pyogenes serotype M49 (strain NZ131) OX=471876 GN=ntpE	CLKIATDSLDTDFKE	S	29	2							1				1
A0A0H3BVL7	ParB domain-containing protein OS=Streptococcus pyogenes serotype M49 (strain NZ131) OX=471876 GN=Spy49_0168	------MSNFISPVY	S	2	2					1		1
A0A0H3BVR1	Amino acid ABC transporter, ATP-binding protein OS=Streptococcus pyogenes serotype M49 (strain NZ131) OX=471876 GN=Spy49_0236c	------MSNSIIEIK	S	2	5			1				2				2
A0A0H3BVR1	Amino acid ABC transporter, ATP-binding protein OS=Streptococcus pyogenes serotype M49 (strain NZ131) OX=471876 GN=Spy49_0236c	EVISIIGSSGSGKST	S	39	2								1				1
A0A0H3BVS5	Oligopeptide transport ATP-binding protein oppF OS=Streptococcus pyogenes serotype M49 (strain NZ131) OX=471876 GN=oppF	INGRKSKSEANELIR	S	80	6					1	1	1		1	1	1
A0A0H3BVU9	Response regulator CsrR OS=Streptococcus pyogenes serotype M49 (strain NZ131) OX=471876 GN=csrR	MMMTARDSIMDVVAG	S	84	6			1		1		1	1			1	1
A0A0H3BVU9	Response regulator CsrR OS=Streptococcus pyogenes serotype M49 (strain NZ131) OX=471876 GN=csrR	VLNPQNRSVNRGDDE	S	145	2												2
A0A0H3BW88	Archaeal S-adenosylmethionine synthetase OS=Streptococcus pyogenes serotype M49 (strain NZ131) OX=471876 GN=Spy49_0455	SVQDFGGSDFIEPIK	S	76	6					2	2		2
A0A0H3BW88	Archaeal S-adenosylmethionine synthetase OS=Streptococcus pyogenes serotype M49 (strain NZ131) OX=471876 GN=Spy49_0455	IIIRGGHSVQDFGGS	S	69	5					1		2	2
A0A0H3BW88	Archaeal S-adenosylmethionine synthetase OS=Streptococcus pyogenes serotype M49 (strain NZ131) OX=471876 GN=Spy49_0455	--MDLKITNGFYDPS	T	6	3					1			2
A0A0H3BW88	Archaeal S-adenosylmethionine synthetase OS=Streptococcus pyogenes serotype M49 (strain NZ131) OX=471876 GN=Spy49_0455	LNNGKQNTNLILSTQ	T	381	3					1			2
A0A0H3BW88	Archaeal S-adenosylmethionine synthetase OS=Streptococcus pyogenes serotype M49 (strain NZ131) OX=471876 GN=Spy49_0455	LKITNGFYDPSHLSY	Y	10	2					2
A0A0H3BW88	Archaeal S-adenosylmethionine synthetase OS=Streptococcus pyogenes serotype M49 (strain NZ131) OX=471876 GN=Spy49_0455	FYDPSHLSYEVVERK	S	16	2							2
A0A0H3BW88	Archaeal S-adenosylmethionine synthetase OS=Streptococcus pyogenes serotype M49 (strain NZ131) OX=471876 GN=Spy49_0455	SKKCFNSSIPLFKIQ	S	98	2					1		1
A0A0H3BW88	Archaeal S-adenosylmethionine synthetase OS=Streptococcus pyogenes serotype M49 (strain NZ131) OX=471876 GN=Spy49_0455	NTNLILSTQHFIPKT	T	387	2								2
A0A0H3BWD2	ATP-dependent zinc metalloprotease FtsH OS=Streptococcus pyogenes serotype M49 (strain NZ131) OX=471876 GN=ftsH	NKIKIDASDIDEAED	S	418	12					2	1	1	1	1		3	3
A0A0H3BWD2	ATP-dependent zinc metalloprotease FtsH OS=Streptococcus pyogenes serotype M49 (strain NZ131) OX=471876 GN=ftsH	KNPKKYKSLGARIPA	S	214	5									2	1	2
A0A0H3BWD6	Phosphoribosylaminoimidazole-succinocarboxamide synthase OS=Streptococcus pyogenes serotype M49 (strain NZ131) OX=471876 GN=purC	LRNVTAGSFSKRFGV	S	109	2			1				1
A0A0H3BWE7	Alcohol dehydrogenase OS=Streptococcus pyogenes serotype M49 (strain NZ131) OX=471876 GN=adhP	RKVLDFIS-------	S	338	10			2		1	1	2		1		3
A0A0H3BWF1	Protein translocase subunit SecY OS=Streptococcus pyogenes serotype M49 (strain NZ131) OX=471876 GN=secY	NLQKNSSYIPSVRPG	Y	347	14	1	1	2		2	1	1		2	2	2
A0A0H3BWF1	Protein translocase subunit SecY OS=Streptococcus pyogenes serotype M49 (strain NZ131) OX=471876 GN=secY	AENLQKNSSYIPSVR	S	345	10					2	2			2	2	2
A0A0H3BWF1	Protein translocase subunit SecY OS=Streptococcus pyogenes serotype M49 (strain NZ131) OX=471876 GN=secY	KNSSYIPSVRPGRET	S	350	10					2	2			2	2	2
A0A0H3BWF1	Protein translocase subunit SecY OS=Streptococcus pyogenes serotype M49 (strain NZ131) OX=471876 GN=secY	LMQGAPTSSYLPLKV	S	257	4					1	1					2
A0A0H3BWF1	Protein translocase subunit SecY OS=Streptococcus pyogenes serotype M49 (strain NZ131) OX=471876 GN=secY	KLMQGAPTSSYLPLK	T	256	3					1	1	1
A0A0H3BWF1	Protein translocase subunit SecY OS=Streptococcus pyogenes serotype M49 (strain NZ131) OX=471876 GN=secY	MQGAPTSSYLPLKVN	S	258	3					1	1			1
A0A0H3BWG0	DNA-directed RNA polymerase subunit beta' OS=Streptococcus pyogenes serotype M49 (strain NZ131) OX=471876 GN=rpoC	SGARGNISNFSQLAG	S	731	5	1		1		1			1				1
A0A0H3BWH3	Putative calcium-transporting ATPase OS=Streptococcus pyogenes serotype M49 (strain NZ131) OX=471876 GN=pacL	KDLSTAVSKDAGIGD	S	190	12			2		1		2	1	1	1	4
A0A0H3BWH3	Putative calcium-transporting ATPase OS=Streptococcus pyogenes serotype M49 (strain NZ131) OX=471876 GN=pacL	EALKSMSSPLARIRR	S	122	11					1	1	2		3	2	2
A0A0H3BWH3	Putative calcium-transporting ATPase OS=Streptococcus pyogenes serotype M49 (strain NZ131) OX=471876 GN=pacL	IRRDGHVTEIDSKEL	T	134	11			2		1	1	2	1	2	1	1
A0A0H3BWH3	Putative calcium-transporting ATPase OS=Streptococcus pyogenes serotype M49 (strain NZ131) OX=471876 GN=pacL	EAALTGESVPVEKDL	S	178	10	1		1	1	1	1	1	1	1	1	1
A0A0H3BWH3	Putative calcium-transporting ATPase OS=Streptococcus pyogenes serotype M49 (strain NZ131) OX=471876 GN=pacL	TSREGLTSAQAKERL	S	31	7					1	1			2	1	2
A0A0H3BWH3	Putative calcium-transporting ATPase OS=Streptococcus pyogenes serotype M49 (strain NZ131) OX=471876 GN=pacL	AAIEALKSMSSPLAR	S	119	7							2		1		4
A0A0H3BWH3	Putative calcium-transporting ATPase OS=Streptococcus pyogenes serotype M49 (strain NZ131) OX=471876 GN=pacL	GDRVNMGYQNSNVTY	Y	203	6					1	1	1	1			2
A0A0H3BWH3	Putative calcium-transporting ATPase OS=Streptococcus pyogenes serotype M49 (strain NZ131) OX=471876 GN=pacL	YQNSNVTYGRGIGVI	Y	210	5					1	1	1	1			1
A0A0H3BWH3	Putative calcium-transporting ATPase OS=Streptococcus pyogenes serotype M49 (strain NZ131) OX=471876 GN=pacL	HEAFYTQSEETVLDQ	S	14	4					1	1	1	1
A0A0H3BWJ5	Transcription termination/antitermination protein NusG OS=Streptococcus pyogenes serotype M49 (strain NZ131) OX=471876 GN=nusG	NVTGFVGSHGNRSKP	S	100	16			2	2	1	1	2	2	1	1	2	2
A0A0H3BWJ5	Transcription termination/antitermination protein NusG OS=Streptococcus pyogenes serotype M49 (strain NZ131) OX=471876 GN=nusG	VGSHGNRSKPTPLLE	S	105	16	1		2	2	1	1	2	1	1	1	2	2
A0A0H3BWK0	PTS system, IIB component OS=Streptococcus pyogenes serotype M49 (strain NZ131) OX=471876 GN=Spy49_0154	DIQSASCSVGEAKGL	S	40	7					1		1	1	1	1	1	1
A0A0H3BWQ8	Ribulose-phosphate 3-epimerase OS=Streptococcus pyogenes serotype M49 (strain NZ131) OX=471876 GN=rpe	GSYLFKASDLVSQVQ	S	205	6					1	1	1		1		2
A0A0H3BWQ8	Ribulose-phosphate 3-epimerase OS=Streptococcus pyogenes serotype M49 (strain NZ131) OX=471876 GN=rpe	FKASDLVSQVQTLRT	S	209	2					1						1
A0A0H3BWV1	Signal transduction histidine-protein kinase ArlS OS=Streptococcus pyogenes serotype M49 (strain NZ131) OX=471876 GN=csrS	KLQSRFISDVSHELR	S	276	2					1	1
A0A0H3BWX7	Beta sliding clamp OS=Streptococcus pyogenes serotype M49 (strain NZ131) OX=471876 GN=dnaN	YPRLQEVSTENPLIL	S	130	4					1	1		1			1
A0A0H3BX27	Dihydrolipoyl dehydrogenase OS=Streptococcus pyogenes serotype M49 (strain NZ131) OX=471876 GN=acoL	KAPAQAASAAPKAAL	S	118	8			1		1		1	1	1	1	1	1
A0A0H3BX27	Dihydrolipoyl dehydrogenase OS=Streptococcus pyogenes serotype M49 (strain NZ131) OX=471876 GN=acoL	DKTVTIGSQTIKGRN	S	253	6					1	1		2				2
A0A0H3BX54	Xaa-His dipeptidase OS=Streptococcus pyogenes serotype M49 (strain NZ131) OX=471876 GN=Spy49_0844	AKFLNQFTFEGAAKD	T	293	8					1	1	1	1	1	1	1	1
A0A0H3BX54	Xaa-His dipeptidase OS=Streptococcus pyogenes serotype M49 (strain NZ131) OX=471876 GN=Spy49_0844	KQTGLKGYEQVIGGG	Y	411	5								1	1	1	1	1
A0A0H3BX54	Xaa-His dipeptidase OS=Streptococcus pyogenes serotype M49 (strain NZ131) OX=471876 GN=Spy49_0844	KELGLPVSKKVRFIV	S	142	3							1				2
A0A0H3BX54	Xaa-His dipeptidase OS=Streptococcus pyogenes serotype M49 (strain NZ131) OX=471876 GN=Spy49_0844	EVTIIGKSAHGSTPE	S	269	2												2
A0A0H3BX58	Uncharacterized protein OS=Streptococcus pyogenes serotype M49 (strain NZ131) OX=471876 GN=Spy49_0129	TLLSLMNSIEQEART	S	10	10					3	2	5
A0A0H3BX58	Uncharacterized protein OS=Streptococcus pyogenes serotype M49 (strain NZ131) OX=471876 GN=Spy49_0129	EARTIYDSYDAKKKA	S	21	7					1		2		1	1	2
A0A0H3BX71	Uncharacterized protein OS=Streptococcus pyogenes serotype M49 (strain NZ131) OX=471876 GN=Spy49_0427c	QLIQRVQSLTVGRLL	S	89	2							1				1
A0A0H3BX75	Catabolite control protein A OS=Streptococcus pyogenes serotype M49 (strain NZ131) OX=471876 GN=ccpA	VAREAGVSMATVSRV	S	19	4					1	1	1					1
A0A0H3BX75	Catabolite control protein A OS=Streptococcus pyogenes serotype M49 (strain NZ131) OX=471876 GN=ccpA	GVSMATVSRVVNGNK	S	24	2							1				1
A0A0H3BX93	Shikimate 5-dehydrogenase OS=Streptococcus pyogenes serotype M49 (strain NZ131) OX=471876 GN=aroE.2	HKKILVDSVCLEDKI	S	41	2					2
A0A0H3BXB3	Uncharacterized protein OS=Streptococcus pyogenes serotype M49 (strain NZ131) OX=471876 GN=Spy49_0911c	YVKHGYVTKPIKKKY	T	56	12	2	1	2		3	2	2
A0A0H3BXC6	Signal recognition particle receptor FtsY OS=Streptococcus pyogenes serotype M49 (strain NZ131) OX=471876 GN=ftsY	KQAQADASNDSAKEE	S	134	13					1			2	2	2	2	4
A0A0H3BXC6	Signal recognition particle receptor FtsY OS=Streptococcus pyogenes serotype M49 (strain NZ131) OX=471876 GN=ftsY	TSKEQSSSQQVMEDY	S	152	11					2	1	2	2			2	2
A0A0H3BXC6	Signal recognition particle receptor FtsY OS=Streptococcus pyogenes serotype M49 (strain NZ131) OX=471876 GN=ftsY	GFSARLNSFFANFRR	S	232	7			1		1	1	1	1			1	1
A0A0H3BXC6	Signal recognition particle receptor FtsY OS=Streptococcus pyogenes serotype M49 (strain NZ131) OX=471876 GN=ftsY	KVSELSQSTASEPKD	S	107	4				1	1			1				1
A0A0H3BXC6	Signal recognition particle receptor FtsY OS=Streptococcus pyogenes serotype M49 (strain NZ131) OX=471876 GN=ftsY	QADASNDSAKEEAVD	S	137	4	1				1			2
A0A0H3BXC6	Signal recognition particle receptor FtsY OS=Streptococcus pyogenes serotype M49 (strain NZ131) OX=471876 GN=ftsY	DLKVSELSQSTASEP	S	105	3					1		1	1
A0A0H3BXC6	Signal recognition particle receptor FtsY OS=Streptococcus pyogenes serotype M49 (strain NZ131) OX=471876 GN=ftsY	PEKADPASVVFDGME	S	381	2					1			1
A0A0H3BXC6	Signal recognition particle receptor FtsY OS=Streptococcus pyogenes serotype M49 (strain NZ131) OX=471876 GN=ftsY	DDIGEFHSEDFMKGL	S	504	2												2
A0A0H3BXD5	30S ribosomal protein S12 OS=Streptococcus pyogenes serotype M49 (strain NZ131) OX=471876 GN=rpsL	ALNIGYNSHKKVQTK	S	48	11			2				4	2			1	2
A0A0H3BXD5	30S ribosomal protein S12 OS=Streptococcus pyogenes serotype M49 (strain NZ131) OX=471876 GN=rpsL	SKIEKSDSPALNIGY	S	39	5			2		1				1		1
A0A0H3BXD5	30S ribosomal protein S12 OS=Streptococcus pyogenes serotype M49 (strain NZ131) OX=471876 GN=rpsL	RKSKIEKSDSPALNI	S	37	2								2
A0A0H3BXF8	Putative sugar ABC transporter OS=Streptococcus pyogenes serotype M49 (strain NZ131) OX=471876 GN=Spy49_0973c	AEMMVGRSVSFTTSK	S	241	12			2		1	1	2		1	1	2	2
A0A0H3BXF8	Putative sugar ABC transporter OS=Streptococcus pyogenes serotype M49 (strain NZ131) OX=471876 GN=Spy49_0973c	MMVGRSVSFTTSKKA	S	243	4									1	1	2
A0A0H3BXF8	Putative sugar ABC transporter OS=Streptococcus pyogenes serotype M49 (strain NZ131) OX=471876 GN=Spy49_0973c	SAKVSDISVGAQQRV	S	143	3								1			1	1
A0A0H3BXF9	Putative ABC transporter OS=Streptococcus pyogenes serotype M49 (strain NZ131) OX=471876 GN=atmD	AQLKYAGTSTDEPLL	T	286	2											2
A0A0H3BXH0	Endolytic murein transglycosylase OS=Streptococcus pyogenes serotype M49 (strain NZ131) OX=471876 GN=mltG	NELQETASKESQVPL	S	124	15	2	1	3	3	2	1	1		1	1
A0A0H3BXH0	Endolytic murein transglycosylase OS=Streptococcus pyogenes serotype M49 (strain NZ131) OX=471876 GN=mltG	AIKDAVMTSEALKPT	T	89	9	2			2	2	1		2
A0A0H3BXH0	Endolytic murein transglycosylase OS=Streptococcus pyogenes serotype M49 (strain NZ131) OX=471876 GN=mltG	QANELQETASKESQV	T	122	6			1	1	1	1	1	1
A0A0H3BXH0	Endolytic murein transglycosylase OS=Streptococcus pyogenes serotype M49 (strain NZ131) OX=471876 GN=mltG	QETASKESQVPLTIE	S	127	5	1				1	1		1				1
A0A0H3BXH0	Endolytic murein transglycosylase OS=Streptococcus pyogenes serotype M49 (strain NZ131) OX=471876 GN=mltG	------MTDFKDKDQ	T	2	5			2				2				1
A0A0H3BXI0	Uncharacterized protein OS=Streptococcus pyogenes serotype M49 (strain NZ131) OX=471876 GN=Spy49_1001c	TISDTVNSDEAAK--	S	157	29	1	1	2	2	3	3	3	3	2	2	3	4
A0A0H3BXI0	Uncharacterized protein OS=Streptococcus pyogenes serotype M49 (strain NZ131) OX=471876 GN=Spy49_1001c	SSTSQFVSEQTEKLK	S	141	17	1	1	2	2	1	1	2	2	1	1	1	2
A0A0H3BXI0	Uncharacterized protein OS=Streptococcus pyogenes serotype M49 (strain NZ131) OX=471876 GN=Spy49_1001c	EKLKDTISDTVNSDE	S	152	13	1	1	2		1		2	2			2	2
A0A0H3BXI0	Uncharacterized protein OS=Streptococcus pyogenes serotype M49 (strain NZ131) OX=471876 GN=Spy49_1001c	TSAASSTSQFVSEQT	S	137	12	1	1	2	2			2	2			1	1
A0A0H3BXI0	Uncharacterized protein OS=Streptococcus pyogenes serotype M49 (strain NZ131) OX=471876 GN=Spy49_1001c	RVTSAASSTSQFVSE	S	135	12			2	2			2	2			2	2
A0A0H3BXI0	Uncharacterized protein OS=Streptococcus pyogenes serotype M49 (strain NZ131) OX=471876 GN=Spy49_1001c	KEEHEAASVTVQDRV	S	122	11			2	3	1	1	2	2
A0A0H3BXI0	Uncharacterized protein OS=Streptococcus pyogenes serotype M49 (strain NZ131) OX=471876 GN=Spy49_1001c	TVQDRVTSAASSTSQ	S	131	10	1				1		2		1	1	2	2
A0A0H3BXI0	Uncharacterized protein OS=Streptococcus pyogenes serotype M49 (strain NZ131) OX=471876 GN=Spy49_1001c	DIPAIAESIKAIVSQ	S	85	10	2		1	1	1		1	1	1		1	1
A0A0H3BXI0	Uncharacterized protein OS=Streptococcus pyogenes serotype M49 (strain NZ131) OX=471876 GN=Spy49_1001c	IVSQNVDSMTHLKVV	S	96	4								2				2
A0A0H3BXI0	Uncharacterized protein OS=Streptococcus pyogenes serotype M49 (strain NZ131) OX=471876 GN=Spy49_1001c	DRVTSAASSTSQFVS	S	134	4				2							1	1
A0A0H3BXI0	Uncharacterized protein OS=Streptococcus pyogenes serotype M49 (strain NZ131) OX=471876 GN=Spy49_1001c	EHEAASVTVQDRVTS	T	124	3							1	2
A0A0H3BXI3	Putative peptidoglycan branched peptide synthesis protein, serine/alanine adding enzyme OS=Streptococcus pyogenes serotype M49 (strain NZ131) OX=471876 GN=murM.1	QKDLTILSEQLAAGK	S	288	4					1	1	1				1
A0A0H3BXP9	Putative rhamnosyltransferase OS=Streptococcus pyogenes serotype M49 (strain NZ131) OX=471876 GN=rgpAc	FNQSVAKSAALYWSK	S	327	6					1	1	2				2
A0A0H3BXP9	Putative rhamnosyltransferase OS=Streptococcus pyogenes serotype M49 (strain NZ131) OX=471876 GN=rgpAc	IKEFMASSTKRDLVI	S	236	5					1	1	1				2
A0A0H3BXP9	Putative rhamnosyltransferase OS=Streptococcus pyogenes serotype M49 (strain NZ131) OX=471876 GN=rgpAc	SRLTTADSKVRAYFQ	S	196	3			1				1		1
A0A0H3BXQ2	DNA translocase FtsK OS=Streptococcus pyogenes serotype M49 (strain NZ131) OX=471876 GN=ftsK	ETQKASASMIQRRLS	S	760	6							1		2	1	2
A0A0H3BXR4	Ribonucleoside-diphosphate reductase OS=Streptococcus pyogenes serotype M49 (strain NZ131) OX=471876 GN=nrdE1	NQRYQPATPSFLNAG	T	155	8	1	1		1	1	1	3
A0A0H3BXS5	Protein-export membrane protein SecG OS=Streptococcus pyogenes serotype M49 (strain NZ131) OX=471876 GN=Spy49_0421	PSSNVFDSSGSEALF	S	35	10				2	1			1	1	1	2	2
A0A0H3BXS5	Protein-export membrane protein SecG OS=Streptococcus pyogenes serotype M49 (strain NZ131) OX=471876 GN=Spy49_0421	NVFDSSGSEALFERT	S	38	7					1				1	1	2	2
A0A0H3BXS5	Protein-export membrane protein SecG OS=Streptococcus pyogenes serotype M49 (strain NZ131) OX=471876 GN=Spy49_0421	SSNVFDSSGSEALFE	S	36	6									1	1	2	2
A0A0H3BXT4	Putative sugar transferase OS=Streptococcus pyogenes serotype M49 (strain NZ131) OX=471876 GN=Spy49_0433	TPTLYSKSLIESYGV	S	118	2							1				1
A0A0H3BXU4	Putative ABC transporter OS=Streptococcus pyogenes serotype M49 (strain NZ131) OX=471876 GN=Spy49_0683	LDAWSIESDVKTVLS	S	135	6					1	1	1		1	1	1
A0A0H3BXU8	AP_endonuc_2 domain-containing protein OS=Streptococcus pyogenes serotype M49 (strain NZ131) OX=471876 GN=Spy49_0451	LKERLQKYNITPISI	Y	59	2					1		1
A0A0H3BXV2	Glyco_trans_2-like domain-containing protein OS=Streptococcus pyogenes serotype M49 (strain NZ131) OX=471876 GN=Spy49_0457	KSSDILSSNDIENLK	S	262	4					1	1	1	1
A0A0H3BXV2	Glyco_trans_2-like domain-containing protein OS=Streptococcus pyogenes serotype M49 (strain NZ131) OX=471876 GN=Spy49_0457	IKSSDILSSNDIENL	S	261	2					1			1
A0A0H3BXW6	Branched-chain-amino-acid aminotransferase OS=Streptococcus pyogenes serotype M49 (strain NZ131) OX=471876 GN=bcaT	LPGKAAKSAGFSDVI	S	201	3					1			2
A0A0H3BXX4	Single-stranded-DNA-specific exonuclease RecJ OS=Streptococcus pyogenes serotype M49 (strain NZ131) OX=471876 GN=recJ	KLTELSHYLNIEKLL	Y	660	2					2
A0A0H3BXY2	Uncharacterized protein OS=Streptococcus pyogenes serotype M49 (strain NZ131) OX=471876 GN=Spy49_0496	KTISVLTSDVNVTLH	S	45	6					1	1	2	2
A0A0H3BXY9	Isoleucine--tRNA ligase OS=Streptococcus pyogenes serotype M49 (strain NZ131) OX=471876 GN=ileS	DPTTRMRSYNAFVCD	S	888	12			2		2	2	2		2	1	1
A0A0H3BXY9	Isoleucine--tRNA ligase OS=Streptococcus pyogenes serotype M49 (strain NZ131) OX=471876 GN=ileS	MCRQYALSQVDKQRN	S	115	8					1	1	2		1	1	2
A0A0H3BXY9	Isoleucine--tRNA ligase OS=Streptococcus pyogenes serotype M49 (strain NZ131) OX=471876 GN=ileS	AGKFGWESFETLASH	S	266	8					2	2	2				2
A0A0H3BXY9	Isoleucine--tRNA ligase OS=Streptococcus pyogenes serotype M49 (strain NZ131) OX=471876 GN=ileS	KGEKMSKSKGNIISP	S	584	5			1				1	1			2
A0A0H3BXZ7	50S ribosomal subunit assembly factor BipA OS=Streptococcus pyogenes serotype M49 (strain NZ131) OX=471876 GN=bipA	GAIIQSLSERKGDML	S	425	5					1	1		2			1
A0A0H3BY05	Carbamate kinase OS=Streptococcus pyogenes serotype M49 (strain NZ131) OX=471876 GN=arcC	QMAESGASFKEDAGR	S	150	28					3	2	1	1	4	5	6	6
A0A0H3BY05	Carbamate kinase OS=Streptococcus pyogenes serotype M49 (strain NZ131) OX=471876 GN=arcC	KLEEVTVSQMKEYIT	S	258	24	2	2	2	1	3	2	3	1	2	2	3	1
A0A0H3BY05	Carbamate kinase OS=Streptococcus pyogenes serotype M49 (strain NZ131) OX=471876 GN=arcC	QDQFAPGSMLPKVEA	S	273	9					1	1		1			2	4
A0A0H3BY05	Carbamate kinase OS=Streptococcus pyogenes serotype M49 (strain NZ131) OX=471876 GN=arcC	VEDATSKSLTGVEAV	S	205	6					1	1	1	1			1	1
A0A0H3BY05	Carbamate kinase OS=Streptococcus pyogenes serotype M49 (strain NZ131) OX=471876 GN=arcC	AQQEALISTSKSLVK	S	31	3								1			2
A0A0H3BY45	Ribosome hibernation promoting factor OS=Streptococcus pyogenes serotype M49 (strain NZ131) OX=471876 GN=hpf	VVRTKNVTLKPMDVE	T	134	12				2	2	2	2	2				2
A0A0H3BY55	Non-specific serine/threonine protein kinase OS=Streptococcus pyogenes serotype M49 (strain NZ131) OX=471876 GN=Spy49_1257c	QESRLDQTNQTDALQ	T	324	47	6	3	4	5	5	1	4	4	3	3	5	4
A0A0H3BY55	Non-specific serine/threonine protein kinase OS=Streptococcus pyogenes serotype M49 (strain NZ131) OX=471876 GN=Spy49_1257c	IFEDVESTKPLPKVA	T	291	33	4		5	2	4	4	5	3	3	2		1
A0A0H3BY55	Non-specific serine/threonine protein kinase OS=Streptococcus pyogenes serotype M49 (strain NZ131) OX=471876 GN=Spy49_1257c	PPTPTVLTQESRLDQ	T	316	20	2		2	2	2	2	2		2	2	2	2
A0A0H3BY55	Non-specific serine/threonine protein kinase OS=Streptococcus pyogenes serotype M49 (strain NZ131) OX=471876 GN=Spy49_1257c	IQNHAPLSNNEVVRI	S	109	18	1	1	2	2	1	1	2	2	1	1	2	2
A0A0H3BY55	Non-specific serine/threonine protein kinase OS=Streptococcus pyogenes serotype M49 (strain NZ131) OX=471876 GN=Spy49_1257c	PKVASGPTASVKLSP	T	302	18	1	1	2	2	1	1	2	2	1	1	2	2
A0A0H3BY55	Non-specific serine/threonine protein kinase OS=Streptococcus pyogenes serotype M49 (strain NZ131) OX=471876 GN=Spy49_1257c	KPLPKVASGPTASVK	S	299	17	1		2	2	1	1	2	2	2	1	2	1
A0A0H3BY55	Non-specific serine/threonine protein kinase OS=Streptococcus pyogenes serotype M49 (strain NZ131) OX=471876 GN=Spy49_1257c	IKVLRTNYQTDQVAV	Y	48	9	1	1	1	1	1						2	2
A0A0H3BY55	Non-specific serine/threonine protein kinase OS=Streptococcus pyogenes serotype M49 (strain NZ131) OX=471876 GN=Spy49_1257c	RDLMTALSYNRSRER	S	274	6					1	1	1	1			1	1
A0A0H3BY55	Non-specific serine/threonine protein kinase OS=Streptococcus pyogenes serotype M49 (strain NZ131) OX=471876 GN=Spy49_1257c	DLMTALSYNRSRERK	Y	275	6					1	1	1	1			1	1
A0A0H3BY55	Non-specific serine/threonine protein kinase OS=Streptococcus pyogenes serotype M49 (strain NZ131) OX=471876 GN=Spy49_1257c	RLDQTNQTDALQPPT	T	327	4	2			1	1
A0A0H3BY55	Non-specific serine/threonine protein kinase OS=Streptococcus pyogenes serotype M49 (strain NZ131) OX=471876 GN=Spy49_1257c	LSDRYGSTFEMSRDL	T	262	3					1	1	1
A0A0H3BY55	Non-specific serine/threonine protein kinase OS=Streptococcus pyogenes serotype M49 (strain NZ131) OX=471876 GN=Spy49_1257c	VLRTNYQTDQVAVAR	T	50	2			1				1
A0A0H3BY61	Ribonuclease Y OS=Streptococcus pyogenes serotype M49 (strain NZ131) OX=471876 GN=rny	SKEKVLDSKEQSLTD	S	129	8					1	1	2	2			2
A0A0H3BY81	Putative L-malate permease OS=Streptococcus pyogenes serotype M49 (strain NZ131) OX=471876 GN=malP	IGHSEDMSDALKDNS	S	257	7					1	1	2		1	1	1
A0A0H3BY81	Putative L-malate permease OS=Streptococcus pyogenes serotype M49 (strain NZ131) OX=471876 GN=malP	QLVKIGHSEDMSDAL	S	253	6									3	1	2
A0A0H3BY83	Transketolase OS=Streptococcus pyogenes serotype M49 (strain NZ131) OX=471876 GN=tkt	------MTFDAIDQL	T	2	2								1				1
A0A0H3BY83	Transketolase OS=Streptococcus pyogenes serotype M49 (strain NZ131) OX=471876 GN=tkt	QNIFDEQSAEYKESI	S	592	2												2
A0A0H3BY85	Rhamnosyltransferase OS=Streptococcus pyogenes serotype M49 (strain NZ131) OX=471876 GN=rgpBc	LIRDDGSTDGTQDII	T	41	6					1	1	1		1	1	1
A0A0H3BY90	Putative ribose-phosphate pyrophosphokinase OS=Streptococcus pyogenes serotype M49 (strain NZ131) OX=471876 GN=prs	SKLGLSGSDVVVVSP	S	169	2					1			1
A0A0H3BY92	Uncharacterized protein OS=Streptococcus pyogenes serotype M49 (strain NZ131) OX=471876 GN=Spy49_1318c	SSKATTSSCPSPEAF	S	64	2					1	1
A0A0H3BY93	Putative pore-forming peptide OS=Streptococcus pyogenes serotype M49 (strain NZ131) OX=471876 GN=Spy49_0625	GPRKLLISAITKIEV	S	90	2							1				1
A0A0H3BY96	Phosphate acetyltransferase OS=Streptococcus pyogenes serotype M49 (strain NZ131) OX=471876 GN=pta	---MSIRSLFGGLRE	S	5	9			1		1	1	2		1	1	2
A0A0H3BY96	Phosphate acetyltransferase OS=Streptococcus pyogenes serotype M49 (strain NZ131) OX=471876 GN=pta	EPIILGQSEEVRNLL	S	52	2					1							1
A0A0H3BYA0	PTS system, IIB component, putative OS=Streptococcus pyogenes serotype M49 (strain NZ131) OX=471876 GN=Spy49_1328c	CGAGVNSSHQIKDAI	S	15	23	1	2	1	2	1	1	3	2	2	2	3	3
A0A0H3BYA0	PTS system, IIB component, putative OS=Streptococcus pyogenes serotype M49 (strain NZ131) OX=471876 GN=Spy49_1328c	ACGAGVNSSHQIKDA	S	14	16	1	1	1	2	4	1	1		2	1	1	1
A0A0H3BYA0	PTS system, IIB component, putative OS=Streptococcus pyogenes serotype M49 (strain NZ131) OX=471876 GN=Spy49_1328c	VEAGPILYRIPIMSE	Y	78	4								4
A0A0H3BYA0	PTS system, IIB component, putative OS=Streptococcus pyogenes serotype M49 (strain NZ131) OX=471876 GN=Spy49_1328c	DAIETQMSDRGYDVH	S	27	2					1							1
A0A0H3BYB7	LSU ribosomal protein L23p (L23Ae) OS=Streptococcus pyogenes serotype M49 (strain NZ131) OX=471876 GN=rplW	FDGVKVASVNTVNVK	S	53	8				1	2	1	2	2
A0A0H3BYB7	LSU ribosomal protein L23p (L23Ae) OS=Streptococcus pyogenes serotype M49 (strain NZ131) OX=471876 GN=rplW	KPVITEKSMIALEAG	S	16	3					1		2
A0A0H3BYB9	Tagatose-6-phosphate kinase OS=Streptococcus pyogenes serotype M49 (strain NZ131) OX=471876 GN=fruK	IDQINLGSVNRMASD	S	24	5				1			1	1			1	1
A0A0H3BYB9	Tagatose-6-phosphate kinase OS=Streptococcus pyogenes serotype M49 (strain NZ131) OX=471876 GN=fruK	KIKSQEETELNGQGP	T	99	2			1								1
A0A0H3BYC1	DNA-directed RNA polymerase subunit alpha OS=Streptococcus pyogenes serotype M49 (strain NZ131) OX=471876 GN=rpoA	VEPARVGSNDGFDKL	S	185	15	1	1	2	2	1	1	2	2	2		1
A0A0H3BYE2	Putative glutamyl-aminopeptidase OS=Streptococcus pyogenes serotype M49 (strain NZ131) OX=471876 GN=pepA	IIKKLDRSTVDLIKR	S	347	4							2				2
A0A0H3BYE2	Putative glutamyl-aminopeptidase OS=Streptococcus pyogenes serotype M49 (strain NZ131) OX=471876 GN=pepA	--MTDLFSKIKEVTE	S	6	2											2
A0A0H3BYE4	Signal recognition particle protein OS=Streptococcus pyogenes serotype M49 (strain NZ131) OX=471876 GN=ffh	GKKKLSESDVQEVTK	S	26	17	1	1	1	1	2	1	1	1	2	1	2	3
A0A0H3BYE4	Signal recognition particle protein OS=Streptococcus pyogenes serotype M49 (strain NZ131) OX=471876 GN=ffh	IAAGSGNSFVEVNKF	S	409	8			1	1			1	1	1	1	1	1
A0A0H3BYE4	Signal recognition particle protein OS=Streptococcus pyogenes serotype M49 (strain NZ131) OX=471876 GN=ffh	RRRIAAGSGNSFVEV	S	406	6							1	1	1	1	1	1
A0A0H3BYF0	Putative ATP-dependent Clp proteinase OS=Streptococcus pyogenes serotype M49 (strain NZ131) OX=471876 GN=clpL	MLTPKADSVLTQLGT	S	74	2												2
A0A0H3BYF0	Putative ATP-dependent Clp proteinase OS=Streptococcus pyogenes serotype M49 (strain NZ131) OX=471876 GN=clpL	AVSKLIGTTAGYVGY	T	496	2												2
A0A0H3BYG0	Putative transcriptional regulator OS=Streptococcus pyogenes serotype M49 (strain NZ131) OX=471876 GN=cpsY	KDGVEFLSYARQIIE	S	66	2					1	1
A0A0H3BYG7	Putative toxic anion resistance protein OS=Streptococcus pyogenes serotype M49 (strain NZ131) OX=471876 GN=Spy49_0138c	KDLKTKDSATPDYQI	S	222	8							1	1	1	1	2	2
A0A0H3BYG9	Aminopeptidase OS=Streptococcus pyogenes serotype M49 (strain NZ131) OX=471876 GN=pepN	AYQNNIASIPAAVRR	S	669	6							2	2			2
A0A0H3BYI5	Glucose-1-phosphate thymidylyltransferase OS=Streptococcus pyogenes serotype M49 (strain NZ131) OX=471876 GN=rmlA	GIILAGGSGTRLYPL	S	10	3					1	1		1
A0A0H3BYJ6	CsbD domain-containing protein OS=Streptococcus pyogenes serotype M49 (strain NZ131) OX=471876 GN=Spy49_1002c	GKISGDKSLETEGKV	S	29	8							1		3	2	2
A0A0H3BYL1	Pyruvate kinase OS=Streptococcus pyogenes serotype M49 (strain NZ131) OX=471876 GN=pyk	ADDAKEFSYVTGEKI	S	107	16					2	2		2	1	1	4	4
A0A0H3BYL1	Pyruvate kinase OS=Streptococcus pyogenes serotype M49 (strain NZ131) OX=471876 GN=pyk	AFPRTNKTDVIASAV	T	384	13					2	1	2	2	1	1	2	2
A0A0H3BYL1	Pyruvate kinase OS=Streptococcus pyogenes serotype M49 (strain NZ131) OX=471876 GN=pyk	NVFRFNFSHGDHKEQ	S	58	8					2	2	2				1	1
A0A0H3BYL1	Pyruvate kinase OS=Streptococcus pyogenes serotype M49 (strain NZ131) OX=471876 GN=pyk	TIDRNAQTLLNEYGR	T	365	4							1	1			1	1
A0A0H3BYL1	Pyruvate kinase OS=Streptococcus pyogenes serotype M49 (strain NZ131) OX=471876 GN=pyk	ATTQGIQSTRDVIAL	S	124	2											1	1
A0A0H3BYL1	Pyruvate kinase OS=Streptococcus pyogenes serotype M49 (strain NZ131) OX=471876 GN=pyk	EYGRLDSSAFPRTNK	S	376	2							1				1
A0A0H3BYM8	Putative ABC transporter OS=Streptococcus pyogenes serotype M49 (strain NZ131) OX=471876 GN=Spy49_0800	KITEHLASFEDLVKR	S	129	4					1	1	2
A0A0H3BYM9	Glyceraldehyde-3-phosphate dehydrogenase OS=Streptococcus pyogenes serotype M49 (strain NZ131) OX=471876 GN=plr	VTLDKNVSVDEINAA	S	255	17	2		2	1	1	1	2	1	2	2	2	1
A0A0H3BYM9	Glyceraldehyde-3-phosphate dehydrogenase OS=Streptococcus pyogenes serotype M49 (strain NZ131) OX=471876 GN=plr	QLVRTLEYFAKIAK-	Y	330	8			2		1	1	2		1		1
A0A0H3BYM9	Glyceraldehyde-3-phosphate dehydrogenase OS=Streptococcus pyogenes serotype M49 (strain NZ131) OX=471876 GN=plr	KVMEVDGSQLVKVVS	S	305	8	1	1	1	1	1		1	1			1
A0A0H3BYM9	Glyceraldehyde-3-phosphate dehydrogenase OS=Streptococcus pyogenes serotype M49 (strain NZ131) OX=471876 GN=plr	TQGRFDGTVEVKEGG	T	57	5					1		2		1		1
A0A0H3BYM9	Glyceraldehyde-3-phosphate dehydrogenase OS=Streptococcus pyogenes serotype M49 (strain NZ131) OX=471876 GN=plr	AANIVPNSTGAAKAI	S	211	4					1				1	1	1
A0A0H3BYM9	Glyceraldehyde-3-phosphate dehydrogenase OS=Streptococcus pyogenes serotype M49 (strain NZ131) OX=471876 GN=plr	ANIVPNSTGAAKAIG	T	212	4			3				1
A0A0H3BYN6	Ribose-phosphate pyrophosphokinase OS=Streptococcus pyogenes serotype M49 (strain NZ131) OX=471876 GN=prsA	SVDKMNTSEVMNIIG	S	206	6							2				2	2
A0A0H3BYN6	Ribose-phosphate pyrophosphokinase OS=Streptococcus pyogenes serotype M49 (strain NZ131) OX=471876 GN=prsA	SPDHGGVTRARKLAQ	T	178	3					1	1	1
A0A0H3BYN6	Ribose-phosphate pyrophosphokinase OS=Streptococcus pyogenes serotype M49 (strain NZ131) OX=471876 GN=prsA	MNIIGNVSGKKCILI	S	216	3												3
A0A0H3BYN8	Lipoate--protein ligase OS=Streptococcus pyogenes serotype M49 (strain NZ131) OX=471876 GN=Spy49_0812	SAKEQFGSWDWTYGK	S	235	2					1							1
A0A0H3BYN9	Putative esterase OS=Streptococcus pyogenes serotype M49 (strain NZ131) OX=471876 GN=Spy49_1033c	GQKRSFSSWLVEKMF	S	29	2							1				1
A0A0H3BYP3	Oligopeptide transport system permease protein oppC OS=Streptococcus pyogenes serotype M49 (strain NZ131) OX=471876 GN=oppC	-MESIDKSKFRFVER	S	7	9					1				1	1	6
A0A0H3BYP3	Oligopeptide transport system permease protein oppC OS=Streptococcus pyogenes serotype M49 (strain NZ131) OX=471876 GN=oppC	FRFVERDSEASEVID	S	16	2											2
A0A0H3BYP4	Phosphoglucosamine mutase OS=Streptococcus pyogenes serotype M49 (strain NZ131) OX=471876 GN=glmM	AGVMISASHNPALDN	S	100	67	4	3	10	4	8	6	9	4	4	4	9	2
A0A0H3BYQ3	30S ribosomal protein S3 OS=Streptococcus pyogenes serotype M49 (strain NZ131) OX=471876 GN=rpsC	IARAEGYSEGTVPLH	S	159	11	1	1	1	1	1		1	1	1	1	1	1
A0A0H3BYQ3	30S ribosomal protein S3 OS=Streptococcus pyogenes serotype M49 (strain NZ131) OX=471876 GN=rpsC	AGAKGIKTQVSGRLN	T	141	5	1	1	1		1		1
A0A0H3BYQ3	30S ribosomal protein S3 OS=Streptococcus pyogenes serotype M49 (strain NZ131) OX=471876 GN=rpsC	AEGYSEGTVPLHTLR	T	162	3					1			2
A0A0H3BYQ9	PTS system, IIB component OS=Streptococcus pyogenes serotype M49 (strain NZ131) OX=471876 GN=Spy49_0834	NVGRFDKSDPASKVK	S	112	13			2		1	1	1	1	2	1	3	1
A0A0H3BYQ9	PTS system, IIB component OS=Streptococcus pyogenes serotype M49 (strain NZ131) OX=471876 GN=Spy49_0834	FDKSDPASKVKVTPS	S	116	11			1		1	1	1		1	1	3	2
A0A0H3BYQ9	PTS system, IIB component OS=Streptococcus pyogenes serotype M49 (strain NZ131) OX=471876 GN=Spy49_0834	SNTKVHLSQLVN---	S	159	8			1		1	1	2		1		2
A0A0H3BYR4	Putative cytoplasmic membrane protein OS=Streptococcus pyogenes serotype M49 (strain NZ131) OX=471876 GN=lemA	PQETMAASNELSKQV	S	91	13				1	1	1	2	2	1	1	2	2
A0A0H3BYR4	Putative cytoplasmic membrane protein OS=Streptococcus pyogenes serotype M49 (strain NZ131) OX=471876 GN=lemA	RARVANASTPQETMA	S	82	7					1			2			2	2
A0A0H3BYR4	Putative cytoplasmic membrane protein OS=Streptococcus pyogenes serotype M49 (strain NZ131) OX=471876 GN=lemA	ELSKQVTSLFAVAEN	S	100	2								2
A0A0H3BYR8	Ribosomal_L12_N domain-containing protein OS=Streptococcus pyogenes serotype M49 (strain NZ131) OX=471876 GN=Spy49_0847	IAEIKEASILELNDL	S	16	5					1	1	1	1				1
A0A0H3BYS1	Putative PBP 5 synthesis repressor OS=Streptococcus pyogenes serotype M49 (strain NZ131) OX=471876 GN=psr	DEDDAFLTESVARCA	T	131	3					1	1		1
A0A0H3BYS4	Dihydropteroate synthase OS=Streptococcus pyogenes serotype M49 (strain NZ131) OX=471876 GN=folP	RPGCRFVSATDEIDR	S	67	7					1	1	1		1	1	1	1
A0A0H3BYS4	Dihydropteroate synthase OS=Streptococcus pyogenes serotype M49 (strain NZ131) OX=471876 GN=folP	GCRFVSATDEIDRVV	T	69	4							1		1	1	1
A0A0H3BYS4	Dihydropteroate synthase OS=Streptococcus pyogenes serotype M49 (strain NZ131) OX=471876 GN=folP	IIDVGGESTRPGCRF	S	58	2					1	1
A0A0H3BYT5	NAD-dependent malic enzyme OS=Streptococcus pyogenes serotype M49 (strain NZ131) OX=471876 GN=Spy49_0864	PGVASVSSAIAKDKT	S	47	5					1				1	1	1	1
A0A0H3BYT6	Non-phosphorylating glyceraldehyde-3-phosphate dehydrogenase (NADP) OS=Streptococcus pyogenes serotype M49 (strain NZ131) OX=471876 GN=gapN	KGHKAAVSEVIRTAE	S	99	3							2				1
A0A0H3BYT6	Non-phosphorylating glyceraldehyde-3-phosphate dehydrogenase (NADP) OS=Streptococcus pyogenes serotype M49 (strain NZ131) OX=471876 GN=gapN	QLAAEIKTLVEKLSV	T	306	2												2
A0A0H3BYW2	EIICB-Lac OS=Streptococcus pyogenes serotype M49 (strain NZ131) OX=471876 GN=lacE	EAAGTNSSDALKEKV	S	428	31	1	2	2	4	2	3	2	3	2	3	4	3
A0A0H3BYW2	EIICB-Lac OS=Streptococcus pyogenes serotype M49 (strain NZ131) OX=471876 GN=lacE	PVTAAAGSYGAHREI	S	499	21	1	1	2	2	4	2	2	2	2	2	1
A0A0H3BYW2	EIICB-Lac OS=Streptococcus pyogenes serotype M49 (strain NZ131) OX=471876 GN=lacE	EEAAGTNSSDALKEK	S	427	21	2				3	1		2	2	2	4	5
A0A0H3BYW2	EIICB-Lac OS=Streptococcus pyogenes serotype M49 (strain NZ131) OX=471876 GN=lacE	LNKAAKEYGAPVTAA	Y	489	16				2	2	2	2	2	2	2	1	1
A0A0H3BYW2	EIICB-Lac OS=Streptococcus pyogenes serotype M49 (strain NZ131) OX=471876 GN=lacE	TAKALTDSMNRSLPS	S	92	5									2	1	2
A0A0H3BYW2	EIICB-Lac OS=Streptococcus pyogenes serotype M49 (strain NZ131) OX=471876 GN=lacE	VLCAGGGTSGLLANA	T	474	4							2	2
A0A0H3BYW2	EIICB-Lac OS=Streptococcus pyogenes serotype M49 (strain NZ131) OX=471876 GN=lacE	AKTEGAQYIKLTRDG	Y	545	2												2
A0A0H3BYW3	Uncharacterized protein OS=Streptococcus pyogenes serotype M49 (strain NZ131) OX=471876 GN=Spy49_0908	SKMEKLTSDKTDADD	S	123	15	2	2	2		1		2		2	2	2
A0A0H3BYW3	Uncharacterized protein OS=Streptococcus pyogenes serotype M49 (strain NZ131) OX=471876 GN=Spy49_0908	ATSQTIQSKMEKLTS	S	116	5	1							2				2
A0A0H3BYW3	Uncharacterized protein OS=Streptococcus pyogenes serotype M49 (strain NZ131) OX=471876 GN=Spy49_0908	VEGIGEATSQTIQSK	T	110	4			2	2
A0A0H3BYW3	Uncharacterized protein OS=Streptococcus pyogenes serotype M49 (strain NZ131) OX=471876 GN=Spy49_0908	EGIGEATSQTIQSKM	S	111	2				1	1
A0A0H3BYW3	Uncharacterized protein OS=Streptococcus pyogenes serotype M49 (strain NZ131) OX=471876 GN=Spy49_0908	IGEATSQTIQSKMEK	T	113	2								2
A0A0H3BYY9	Superoxide dismutase OS=Streptococcus pyogenes serotype M49 (strain NZ131) OX=471876 GN=sodM	HHDKHHATYVANTNA	T	34	10				2	1	1	2	2				2
A0A0H3BZ00	Collagen-like surface protein OS=Streptococcus pyogenes serotype M49 (strain NZ131) OX=471876 GN=sclA	GEKAPEKSPEVTPTP	S	284	2											1	1
A0A0H3BZ03	R3H domain protein OS=Streptococcus pyogenes serotype M49 (strain NZ131) OX=471876 GN=Spy49_0209	TMDPMSNSERKIVHK	S	270	39	3	1	2	4	2	2	4	4	2	3	6	6
A0A0H3BZ03	R3H domain protein OS=Streptococcus pyogenes serotype M49 (strain NZ131) OX=471876 GN=Spy49_0209	QVDIEGISDKTVYKA	S	55	20	1	1	2	2	1		2	4	1	1	2	3
A0A0H3BZ03	R3H domain protein OS=Streptococcus pyogenes serotype M49 (strain NZ131) OX=471876 GN=Spy49_0209	KNAPAVNSADVEPEE	S	84	17	1	1	1	1	2	1	2	2	1	1	2	2
A0A0H3BZ03	R3H domain protein OS=Streptococcus pyogenes serotype M49 (strain NZ131) OX=471876 GN=Spy49_0209	YHGKVLKSLQLLAQN	S	210	9					1	1	2	2			1	2
A0A0H3BZ03	R3H domain protein OS=Streptococcus pyogenes serotype M49 (strain NZ131) OX=471876 GN=Spy49_0209	QKLEAEDTKVVPLMS	T	103	4							2	2
A0A0H3BZ03	R3H domain protein OS=Streptococcus pyogenes serotype M49 (strain NZ131) OX=471876 GN=Spy49_0209	IVHKTVSSIEGVDSY	S	281	2												2
A0A0H3BZ03	R3H domain protein OS=Streptococcus pyogenes serotype M49 (strain NZ131) OX=471876 GN=Spy49_0209	YVEHRTETLIDFTQK	T	243	2					1			1
A0A0H3BZ03	R3H domain protein OS=Streptococcus pyogenes serotype M49 (strain NZ131) OX=471876 GN=Spy49_0209	KIVHKTVSSIEGVDS	S	280	2	1								1
A0A0H3BZ11	Phosphoglucomutase OS=Streptococcus pyogenes serotype M49 (strain NZ131) OX=471876 GN=pgmA	YLRQELLSMDEKTKE	S	26	3					1	1						1
A0A0H3BZ11	Phosphoglucomutase OS=Streptococcus pyogenes serotype M49 (strain NZ131) OX=471876 GN=pgmA	KTISVTLSGVDGAAE	S	464	2								1				1
A0A0H3BZ18	Cell-division initiation protein OS=Streptococcus pyogenes serotype M49 (strain NZ131) OX=471876 GN=divIVA	PEVNLSETQTFKLNI	T	245	33	2		4	4	4	5	2	6	1	1	2	2
A0A0H3BZ18	Cell-division initiation protein OS=Streptococcus pyogenes serotype M49 (strain NZ131) OX=471876 GN=divIVA	DSASFDATRQFTPEE	T	201	22	2		2	2	2	2	2	4	1	1	2	2
A0A0H3BZ18	Cell-division initiation protein OS=Streptococcus pyogenes serotype M49 (strain NZ131) OX=471876 GN=divIVA	NLVSKATYDAQHLLD	Y	98	18			2	2	1	1	2	2	2	2	2	2
A0A0H3BZ18	Cell-division initiation protein OS=Streptococcus pyogenes serotype M49 (strain NZ131) OX=471876 GN=divIVA	AEATNLVSKATYDAQ	S	94	17	2	1	2	2	1	1	1	1	1	1	3	1
A0A0H3BZ18	Cell-division initiation protein OS=Streptococcus pyogenes serotype M49 (strain NZ131) OX=471876 GN=divIVA	DEMKESLSQSVILAQ	S	68	7				2	1	1		2				1
A0A0H3BZ18	Cell-division initiation protein OS=Streptococcus pyogenes serotype M49 (strain NZ131) OX=471876 GN=divIVA	MKESLSQSVILAQET	S	70	2								1				1
A0A0H3BZ23	Cell division protein FtsZ OS=Streptococcus pyogenes serotype M49 (strain NZ131) OX=471876 GN=ftsZ	VAGAQYASDQAKQSV	S	348	17	1	1	2	2	1	1	2	2	1		2	2
A0A0H3BZ23	Cell division protein FtsZ OS=Streptococcus pyogenes serotype M49 (strain NZ131) OX=471876 GN=ftsZ	QEKAEQVSGFRQPRT	S	325	13	1	1	2		2	1	2		1	1	2
A0A0H3BZ23	Cell division protein FtsZ OS=Streptococcus pyogenes serotype M49 (strain NZ131) OX=471876 GN=ftsZ	-MAFSFDTASIQGAI	T	7	12	1	1	2	2	1	1	2	2
A0A0H3BZ23	Cell division protein FtsZ OS=Streptococcus pyogenes serotype M49 (strain NZ131) OX=471876 GN=ftsZ	PSAQKVISNHNQNQG	S	383	12	1			1	1	1	2	2			2	2
A0A0H3BZ23	Cell division protein FtsZ OS=Streptococcus pyogenes serotype M49 (strain NZ131) OX=471876 GN=ftsZ	LMGIGIGSGEERIVE	S	233	10				1	1	1	1	1	1	1	1	2
A0A0H3BZ23	Cell division protein FtsZ OS=Streptococcus pyogenes serotype M49 (strain NZ131) OX=471876 GN=ftsZ	----MAFSFDTASIQ	S	4	10					1	1	2	2			2	2
A0A0H3BZ23	Cell division protein FtsZ OS=Streptococcus pyogenes serotype M49 (strain NZ131) OX=471876 GN=ftsZ	ASDQAKQSVQPGFDR	S	354	8			1		1	1		1	1	1	1	1
A0A0H3BZ23	Cell division protein FtsZ OS=Streptococcus pyogenes serotype M49 (strain NZ131) OX=471876 GN=ftsZ	QPRTFTQTNAQQVAG	T	336	8					1	1	2	2				2
A0A0H3BZ23	Cell division protein FtsZ OS=Streptococcus pyogenes serotype M49 (strain NZ131) OX=471876 GN=ftsZ	NHNQNQGSAFGNWDL	S	391	7				1	1		2	1			1	1
A0A0H3BZ23	Cell division protein FtsZ OS=Streptococcus pyogenes serotype M49 (strain NZ131) OX=471876 GN=ftsZ	AFSFDTASIQGAIIK	S	9	3											2	1
A0A0H3BZ23	Cell division protein FtsZ OS=Streptococcus pyogenes serotype M49 (strain NZ131) OX=471876 GN=ftsZ	QQVAGAQYASDQAKQ	Y	346	3				1								2
A0A0H3BZ23	Cell division protein FtsZ OS=Streptococcus pyogenes serotype M49 (strain NZ131) OX=471876 GN=ftsZ	TPLLEALSEADNVLR	S	185	2					1			1
A0A0H3BZ29	Iron-sulfur cluster assembly ATPase protein SufC OS=Streptococcus pyogenes serotype M49 (strain NZ131) OX=471876 GN=Spy49_0242	KADEDKISVRDFITK	S	116	2							2
A0A0H3BZ33	Xaa-His dipeptidase OS=Streptococcus pyogenes serotype M49 (strain NZ131) OX=471876 GN=Spy49_1193c	RKKTGDQSPAQSSGG	S	384	9					1		1	1	1	1	2	2
A0A0H3BZ39	Fc-gamma receptor OS=Streptococcus pyogenes serotype M49 (strain NZ131) OX=471876 GN=Spy49_1672c	DKELSFLSKVLDEAA	S	100	3	1		1				1
A0A0H3BZ40	Oligopeptide transport ATP-binding protein oppD OS=Streptococcus pyogenes serotype M49 (strain NZ131) OX=471876 GN=oppD	NGRIANGSIVYRGQE	S	72	8							2		2	2	2
A0A0H3BZ40	Oligopeptide transport ATP-binding protein oppD OS=Streptococcus pyogenes serotype M49 (strain NZ131) OX=471876 GN=oppD	QKILRKMSQQEEGNV	S	349	2					1						1
A0A0H3BZ43	Uncharacterized protein OS=Streptococcus pyogenes serotype M49 (strain NZ131) OX=471876 GN=Spy49_1003c	VSLQDKVSDMARSTF	S	141	28	1	1	4	4	1	1	2	2	4	2	3	3
A0A0H3BZ43	Uncharacterized protein OS=Streptococcus pyogenes serotype M49 (strain NZ131) OX=471876 GN=Spy49_1003c	ETYIKNTSKDLTSAI	S	10	11	1				1	2	2	2	1	1	1
A0A0H3BZ43	Uncharacterized protein OS=Streptococcus pyogenes serotype M49 (strain NZ131) OX=471876 GN=Spy49_1003c	NTSKDLTSAIRGQLT	S	15	8					1	1	2		1	1	2
A0A0H3BZ43	Uncharacterized protein OS=Streptococcus pyogenes serotype M49 (strain NZ131) OX=471876 GN=Spy49_1003c	HVPTIYDSIKSIVEE	S	96	8	1		1		1	1	2		2
A0A0H3BZ43	Uncharacterized protein OS=Streptococcus pyogenes serotype M49 (strain NZ131) OX=471876 GN=Spy49_1003c	TIYDSIKSIVEEEVK	S	99	7					1		1		2	1	1	1
A0A0H3BZ43	Uncharacterized protein OS=Streptococcus pyogenes serotype M49 (strain NZ131) OX=471876 GN=Spy49_1003c	TETYIKNTSKDLTSA	T	9	4			2	2
A0A0H3BZ43	Uncharacterized protein OS=Streptococcus pyogenes serotype M49 (strain NZ131) OX=471876 GN=Spy49_1003c	DKLVNTESVRDGVNV	S	62	3			1		1		1
A0A0H3BZ43	Uncharacterized protein OS=Streptococcus pyogenes serotype M49 (strain NZ131) OX=471876 GN=Spy49_1003c	EYQKHVPTIYDSIKS	T	92	2					1							1
A0A0H3BZ60	Histidine kinase OS=Streptococcus pyogenes serotype M49 (strain NZ131) OX=471876 GN=Spy49_1240c	GIEQNDISIVRLTYE	S	278	2							1				1
A0A0H3BZ61	F420_ligase domain-containing protein OS=Streptococcus pyogenes serotype M49 (strain NZ131) OX=471876 GN=Spy49_0453	RKTEVIDSQGETIKF	S	189	15	1			3	3	3	3	2
A0A0H3BZ61	F420_ligase domain-containing protein OS=Streptococcus pyogenes serotype M49 (strain NZ131) OX=471876 GN=Spy49_0453	VAVVITDSDGREDKR	S	159	11					2	2	3	4
A0A0H3BZ61	F420_ligase domain-containing protein OS=Streptococcus pyogenes serotype M49 (strain NZ131) OX=471876 GN=Spy49_0453	SGGIDRKSVDEVFLL	S	122	6					1	1	2	2
A0A0H3BZ61	F420_ligase domain-containing protein OS=Streptococcus pyogenes serotype M49 (strain NZ131) OX=471876 GN=Spy49_0453	NLVNRDLSRLDIKKN	S	94	2					1	1
A0A0H3BZ61	F420_ligase domain-containing protein OS=Streptococcus pyogenes serotype M49 (strain NZ131) OX=471876 GN=Spy49_0453	LVMGQRGTGIPAVLI	T	218	2					1	1
A0A0H3BZ61	F420_ligase domain-containing protein OS=Streptococcus pyogenes serotype M49 (strain NZ131) OX=471876 GN=Spy49_0453	----MNLSIFGLKNI	S	4	2							2
A0A0H3BZ68	Membrane protein insertase YidC OS=Streptococcus pyogenes serotype M49 (strain NZ131) OX=471876 GN=oxaA	SRKDVTPSQNMEQAN	S	283	4					1	1	2
A0A0H3BZ76	Putative phosphoprotein phosphatase (PppL protein) OS=Streptococcus pyogenes serotype M49 (strain NZ131) OX=471876 GN=pppL	TDIGQKRSNNQDFIN	S	14	21	1	1	2		1	1	2	2	3	2	4	2
A0A0H3BZ76	Putative phosphoprotein phosphatase (PppL protein) OS=Streptococcus pyogenes serotype M49 (strain NZ131) OX=471876 GN=pppL	ITEEEAASHPQRNII	S	155	14	1		1		2	2	2	2	1	1	1	1
A0A0H3BZ76	Putative phosphoprotein phosphatase (PppL protein) OS=Streptococcus pyogenes serotype M49 (strain NZ131) OX=471876 GN=pppL	TQSIGQASPVEPDLG	S	170	12					2	2	2	2			2	2
A0A0H3BZ76	Putative phosphoprotein phosphatase (PppL protein) OS=Streptococcus pyogenes serotype M49 (strain NZ131) OX=471876 GN=pppL	RIYDLGQSEDFKGMG	S	91	8					1	1	1	1	1	1	1	1
A0A0H3BZ76	Putative phosphoprotein phosphatase (PppL protein) OS=Streptococcus pyogenes serotype M49 (strain NZ131) OX=471876 GN=pppL	WLFETIQSENQRIYD	S	80	7					1	1		1			2	2
A0A0H3BZ85	Putative endopeptidase Clp ATP-binding chain C OS=Streptococcus pyogenes serotype M49 (strain NZ131) OX=471876 GN=clpC	ILSRELTSGHTLKIG	S	796	8	1	1	3		1		1		1
A0A0H3BZ90	Alkyl hydroperoxide reductase protein F OS=Streptococcus pyogenes serotype M49 (strain NZ131) OX=471876 GN=nox3	RISIENITLDRQPSF	T	57	5					1	1		1			1	1
A0A0H3BZ95	UPF0371 protein Spy49_1067 OS=Streptococcus pyogenes serotype M49 (strain NZ131) OX=471876 GN=Spy49_1067	DINHIISSEGMGKND	S	143	15			3		2		2		2	2	2	2
A0A0H3BZA2	Uncharacterized protein OS=Streptococcus pyogenes serotype M49 (strain NZ131) OX=471876 GN=Spy49_0497	QFAKEKGSEYSHLAR	S	57	5					2	1	2
A0A0H3BZA2	Uncharacterized protein OS=Streptococcus pyogenes serotype M49 (strain NZ131) OX=471876 GN=Spy49_0497	AYQAYKESPDDYHQF	S	44	2					1	1
A0A0H3BZA2	Uncharacterized protein OS=Streptococcus pyogenes serotype M49 (strain NZ131) OX=471876 GN=Spy49_0497	YSHLARDTFYDVKDK	T	66	2							2
A0A0H3BZB4	Phosphoenolpyruvate-protein phosphotransferase OS=Streptococcus pyogenes serotype M49 (strain NZ131) OX=471876 GN=ptsI	QAAQDELSVIRENAV	S	56	12					2	2	2	2			2	2
A0A0H3BZB4	Phosphoenolpyruvate-protein phosphotransferase OS=Streptococcus pyogenes serotype M49 (strain NZ131) OX=471876 GN=ptsI	FPTEDEQYEAYKAVL	Y	316	6								2			2	2
A0A0H3BZB4	Phosphoenolpyruvate-protein phosphotransferase OS=Streptococcus pyogenes serotype M49 (strain NZ131) OX=471876 GN=ptsI	VTNIGGRTSHSAIMA	T	189	5							2	2			1
A0A0H3BZB4	Phosphoenolpyruvate-protein phosphotransferase OS=Streptococcus pyogenes serotype M49 (strain NZ131) OX=471876 GN=ptsI	IGGRTSHSAIMARTL	S	192	3					1		1	1
A0A0H3BZC1	Uncharacterized protein OS=Streptococcus pyogenes serotype M49 (strain NZ131) OX=471876 GN=Spy49_0377	DDAVDFDTKVMTLPE	T	30	53	3	1	5		10	10	12		5	3	4
A0A0H3BZC1	Uncharacterized protein OS=Streptococcus pyogenes serotype M49 (strain NZ131) OX=471876 GN=Spy49_0377	EKARRMETFESDDAV	T	19	7	1	1			3	2
A0A0H3BZC1	Uncharacterized protein OS=Streptococcus pyogenes serotype M49 (strain NZ131) OX=471876 GN=Spy49_0377	-MGRPLLTDDIIEKA	T	7	4			2		1	1
A0A0H3BZC7	EIIAB-Man OS=Streptococcus pyogenes serotype M49 (strain NZ131) OX=471876 GN=manL	ADRIIVASDEVAQDD	S	201	18	1			2	3	1	2	2	1	1	2	3
A0A0H3BZC7	EIIAB-Man OS=Streptococcus pyogenes serotype M49 (strain NZ131) OX=471876 GN=manL	LLHGQVATAWTPASK	T	186	16	1	1	2	2	2	2	2	2				2
A0A0H3BZC7	EIIAB-Man OS=Streptococcus pyogenes serotype M49 (strain NZ131) OX=471876 GN=manL	KANVVPISKLIEASK	S	230	10	1	1	2		1	1	2		1		1
A0A0H3BZC7	EIIAB-Man OS=Streptococcus pyogenes serotype M49 (strain NZ131) OX=471876 GN=manL	ISKLIEASKDPRFGN	S	236	8					1		2		2	1	1	1
A0A0H3BZC7	EIIAB-Man OS=Streptococcus pyogenes serotype M49 (strain NZ131) OX=471876 GN=manL	QGAIPAGTVIGDGKL	T	161	7				1	1	1	2	2
A0A0H3BZC7	EIIAB-Man OS=Streptococcus pyogenes serotype M49 (strain NZ131) OX=471876 GN=manL	ATAWTPASKADRIIV	S	192	6					1	1		2				2
A0A0H3BZC7	EIIAB-Man OS=Streptococcus pyogenes serotype M49 (strain NZ131) OX=471876 GN=manL	INELNVGSMAHSTGK	S	273	3					2	1
A0A0H3BZC7	EIIAB-Man OS=Streptococcus pyogenes serotype M49 (strain NZ131) OX=471876 GN=manL	VGSMAHSTGKTMVNN	T	278	2											1	1
A0A0H3BZC7	EIIAB-Man OS=Streptococcus pyogenes serotype M49 (strain NZ131) OX=471876 GN=manL	FAEGIHQSGSMIFGE	S	20	2				1								1
A0A0H3BZC9	Uridylate kinase OS=Streptococcus pyogenes serotype M49 (strain NZ131) OX=471876 GN=pyrH	QRILIKLSGEALAGE	S	13	7			1				2		2	1	1
A0A0H3BZD6	Putative PTS system enzyme II OS=Streptococcus pyogenes serotype M49 (strain NZ131) OX=471876 GN=Spy49_1737c	KLPETPVSDAPVATA	S	507	62	3	3	5	4	8	5	6	3	9	6	10
A0A0H3BZD6	Putative PTS system enzyme II OS=Streptococcus pyogenes serotype M49 (strain NZ131) OX=471876 GN=Spy49_1737c	DEAKLPETPVSDAPV	T	504	45	2	2	3	2	3	3	5	4	5	6	10
A0A0H3BZD6	Putative PTS system enzyme II OS=Streptococcus pyogenes serotype M49 (strain NZ131) OX=471876 GN=Spy49_1737c	PHKTMQGTVITLTSP	T	522	14					3	3		4			4
A0A0H3BZD6	Putative PTS system enzyme II OS=Streptococcus pyogenes serotype M49 (strain NZ131) OX=471876 GN=Spy49_1737c	AAKSAAKSNQNALQR	S	97	12									4	3	5
A0A0H3BZD6	Putative PTS system enzyme II OS=Streptococcus pyogenes serotype M49 (strain NZ131) OX=471876 GN=Spy49_1737c	VSDAPVATAPHKTMQ	T	513	10					1	1	1	2	1		4
A0A0H3BZD6	Putative PTS system enzyme II OS=Streptococcus pyogenes serotype M49 (strain NZ131) OX=471876 GN=Spy49_1737c	VSKEAAKSAAKSNQN	S	93	6					1				2	1	2
A0A0H3BZD6	Putative PTS system enzyme II OS=Streptococcus pyogenes serotype M49 (strain NZ131) OX=471876 GN=Spy49_1737c	KFEQDAKSLLTAIGG	S	10	4							2				2
A0A0H3BZD9	Protein GrpE OS=Streptococcus pyogenes serotype M49 (strain NZ131) OX=471876 GN=grpE	LAKAILPSLDNLERA	S	99	11	1	1	1		1	1	1	1	1	1	2
A0A0H3BZE8	Universal stress protein OS=Streptococcus pyogenes serotype M49 (strain NZ131) OX=471876 GN=Spy49_1389	DLLVVRDSTKTL---	S	146	3									1		2
A0A0H3BZF7	Putative NAD(P)H-flavin oxidoreductase OS=Streptococcus pyogenes serotype M49 (strain NZ131) OX=471876 GN=Spy49_0430c	SRLKLYESFQKEDMD	S	122	2							2
A0A0H3BZH8	ABC transporter ATP-binding protein OS=Streptococcus pyogenes serotype M49 (strain NZ131) OX=471876 GN=Spy49_1815	EPSTGHISLGPDERL	S	59	5					1				1	1	2
A0A0H3BZH8	ABC transporter ATP-binding protein OS=Streptococcus pyogenes serotype M49 (strain NZ131) OX=471876 GN=Spy49_1815	KKSVNVLSGGEKVRV	S	440	4											2	2
A0A0H3BZI2	Uncharacterized protein OS=Streptococcus pyogenes serotype M49 (strain NZ131) OX=471876 GN=Spy49_0454	SDVLDDLSRQYFTIE	S	57	3					1		1	1
A0A0H3BZI7	Putative ATP-dependent protease OS=Streptococcus pyogenes serotype M49 (strain NZ131) OX=471876 GN=clpE	LRALMTNSENITIKA	S	739	3					1	1						1
A0A0H3BZI7	Putative ATP-dependent protease OS=Streptococcus pyogenes serotype M49 (strain NZ131) OX=471876 GN=clpE	DLKEKEQSQLVNLAN	S	446	2												2
A0A0H3BZI8	Putative glycosyl transferase OS=Streptococcus pyogenes serotype M49 (strain NZ131) OX=471876 GN=Spy49_0620	IIPAYNESSNIVNTI	S	13	6					3	1					2
A0A0H3BZI8	Putative glycosyl transferase OS=Streptococcus pyogenes serotype M49 (strain NZ131) OX=471876 GN=Spy49_0620	IPAYNESSNIVNTIR	S	14	2					1	1
A0A0H3BZI9	UDP-glucose 6-dehydrogenase OS=Streptococcus pyogenes serotype M49 (strain NZ131) OX=471876 GN=Spy49_0459	YDQRIGNSHNNPSFG	S	238	5					2	1		2
A0A0H3BZI9	UDP-glucose 6-dehydrogenase OS=Streptococcus pyogenes serotype M49 (strain NZ131) OX=471876 GN=Spy49_0459	AKNINATSSEELAYK	S	64	4					1	1	1	1
A0A0H3BZI9	UDP-glucose 6-dehydrogenase OS=Streptococcus pyogenes serotype M49 (strain NZ131) OX=471876 GN=Spy49_0459	DFNEFIKYSDIIVAN	Y	356	4					1	1	1	1
A0A0H3BZI9	UDP-glucose 6-dehydrogenase OS=Streptococcus pyogenes serotype M49 (strain NZ131) OX=471876 GN=Spy49_0459	APIITSISESNLLRK	S	274	2								2
A0A0H3BZJ0	Formate acetyltransferase OS=Streptococcus pyogenes serotype M49 (strain NZ131) OX=471876 GN=pfl	RVFHEVLSMDDAAEA	S	764	15			1		2	2	2	2			2	4
A0A0H3BZJ0	Formate acetyltransferase OS=Streptococcus pyogenes serotype M49 (strain NZ131) OX=471876 GN=pfl	TPYDGDESFLAGATE	S	45	12					1	1	2	2	1	1	2	2
A0A0H3BZJ0	Formate acetyltransferase OS=Streptococcus pyogenes serotype M49 (strain NZ131) OX=471876 GN=pfl	GIFRAYTSNIRRARH	S	155	12	1	1	2		1	1	2		3		1
A0A0H3BZJ0	Formate acetyltransferase OS=Streptococcus pyogenes serotype M49 (strain NZ131) OX=471876 GN=pfl	MATVKTNTDVFEKAW	T	8	9					1	1	1		1	1	2	2
A0A0H3BZJ0	Formate acetyltransferase OS=Streptococcus pyogenes serotype M49 (strain NZ131) OX=471876 GN=pfl	GWLQNLNSLAKLEFS	S	662	8					1	1	1	1	1	1	1	1
A0A0H3BZJ0	Formate acetyltransferase OS=Streptococcus pyogenes serotype M49 (strain NZ131) OX=471876 GN=pfl	EDGTVNTSQVEFFSP	S	637	8							2	2			2	2
A0A0H3BZJ0	Formate acetyltransferase OS=Streptococcus pyogenes serotype M49 (strain NZ131) OX=471876 GN=pfl	KAYDALYSGDPTFIT	S	323	5											2	3
A0A0H3BZJ0	Formate acetyltransferase OS=Streptococcus pyogenes serotype M49 (strain NZ131) OX=471876 GN=pfl	EDVIVRISGYCVNTK	S	737	5					1		1		2		1
A0A0H3BZJ0	Formate acetyltransferase OS=Streptococcus pyogenes serotype M49 (strain NZ131) OX=471876 GN=pfl	ISLTTQVSPRALGKT	S	682	4					1			1			1	1
A0A0H3BZJ0	Formate acetyltransferase OS=Streptococcus pyogenes serotype M49 (strain NZ131) OX=471876 GN=pfl	DAAEAISSK------	S	774	4											2	2
A0A0H3BZJ0	Formate acetyltransferase OS=Streptococcus pyogenes serotype M49 (strain NZ131) OX=471876 GN=pfl	VIVRISGYCVNTKYL	Y	739	3									1		1	1
A0A0H3BZJ0	Formate acetyltransferase OS=Streptococcus pyogenes serotype M49 (strain NZ131) OX=471876 GN=pfl	MKMSHKHSSIQYEGV	S	390	2												2
A0A0H3BZJ0	Formate acetyltransferase OS=Streptococcus pyogenes serotype M49 (strain NZ131) OX=471876 GN=pfl	LTGLNGGYDDVHRDY	Y	450	2												2
A0A0H3BZJ0	Formate acetyltransferase OS=Streptococcus pyogenes serotype M49 (strain NZ131) OX=471876 GN=pfl	SHANDGISLTTQVSP	S	676	2								2
A0A0H3BZJ8	Cell division protein FtsA OS=Streptococcus pyogenes serotype M49 (strain NZ131) OX=471876 GN=ftsA	VKVDVVGSEEPVEVT	S	280	8	1			1	1	1		1	1		1	1
A0A0H3BZK2	50S ribosomal protein L27 OS=Streptococcus pyogenes serotype M49 (strain NZ131) OX=471876 GN=rpmA	AADGQTVSGGSILYR	S	43	8	1	1		1	1	1	1	1				1
A0A0H3BZK2	50S ribosomal protein L27 OS=Streptococcus pyogenes serotype M49 (strain NZ131) OX=471876 GN=rpmA	RQRGTHIYPGVNVGR	Y	57	2								2
A0A0H3BZK3	Glucokinase OS=Streptococcus pyogenes serotype M49 (strain NZ131) OX=471876 GN=Spy49_1181c	KETQEVGSVVEKELG	S	99	3								1			1	1
A0A0H3BZL3	Conserved hypothetical integral membrane protein OS=Streptococcus pyogenes serotype M49 (strain NZ131) OX=471876 GN=Spy49_1194c	ELFQLQNSGEDLNKR	S	186	25				2	3	2	3	3	2	2	3	5
A0A0H3BZL3	Conserved hypothetical integral membrane protein OS=Streptococcus pyogenes serotype M49 (strain NZ131) OX=471876 GN=Spy49_1194c	ALDTGIASVVRKNKG	S	45	2											1	1
A0A0H3BZL3	Conserved hypothetical integral membrane protein OS=Streptococcus pyogenes serotype M49 (strain NZ131) OX=471876 GN=Spy49_1194c	SKIEEDPSKSLVADK	S	166	2												2
A0A0H3BZL6	Beta-glucoside permease IIABC component OS=Streptococcus pyogenes serotype M49 (strain NZ131) OX=471876 GN=Spy49_0485	DQQVKAISNVIGVMR	S	49	4					1	1	1				1
A0A0H3BZL6	Beta-glucoside permease IIABC component OS=Streptococcus pyogenes serotype M49 (strain NZ131) OX=471876 GN=Spy49_0485	QGFEQLVSVGDVVKR	S	560	3					1	1					1
A0A0H3BZL9	PTS system, fructose-specific IIABC component OS=Streptococcus pyogenes serotype M49 (strain NZ131) OX=471876 GN=fruA	KVETNGASGVANRLT	S	205	49	3	3	5	6	3	3	6	6	6	2	5	1
A0A0H3BZL9	PTS system, fructose-specific IIABC component OS=Streptococcus pyogenes serotype M49 (strain NZ131) OX=471876 GN=fruA	YHAKNGKSETAVSTE	S	274	33	2	2	3	2	2	1	4	4	3	1	5	4
A0A0H3BZL9	PTS system, fructose-specific IIABC component OS=Streptococcus pyogenes serotype M49 (strain NZ131) OX=471876 GN=fruA	IMTREEQTSTGLGDG	T	55	28	1	1	4	4			3	2	2	2	4	5
A0A0H3BZL9	PTS system, fructose-specific IIABC component OS=Streptococcus pyogenes serotype M49 (strain NZ131) OX=471876 GN=fruA	KKSQELISLILNNEG	S	257	16	1		1	1	1	1	2	2	1	2	2	2
A0A0H3BZL9	PTS system, fructose-specific IIABC component OS=Streptococcus pyogenes serotype M49 (strain NZ131) OX=471876 GN=fruA	LNNEGNTYHAKNGKS	Y	267	14	1		1		1	1	2	2	1	1	2	2
A0A0H3BZL9	PTS system, fructose-specific IIABC component OS=Streptococcus pyogenes serotype M49 (strain NZ131) OX=471876 GN=fruA	DGIAMPHSKNIVVDK	S	68	13				1	1	1	2	2	1	1	2	2
A0A0H3BZL9	PTS system, fructose-specific IIABC component OS=Streptococcus pyogenes serotype M49 (strain NZ131) OX=471876 GN=fruA	AVSTEKTSLGGAFYK	S	284	12	1	1	2		1	1	1	1	1	1	2
A0A0H3BZL9	PTS system, fructose-specific IIABC component OS=Streptococcus pyogenes serotype M49 (strain NZ131) OX=471876 GN=fruA	TAVSTEKTSLGGAFY	T	283	6	1	1		2				2
A0A0H3BZL9	PTS system, fructose-specific IIABC component OS=Streptococcus pyogenes serotype M49 (strain NZ131) OX=471876 GN=fruA	VADGIKKSQELISLI	S	252	6							2	2				2
A0A0H3BZL9	PTS system, fructose-specific IIABC component OS=Streptococcus pyogenes serotype M49 (strain NZ131) OX=471876 GN=fruA	ILNNEGNTYHAKNGK	T	266	4					1	1		2
A0A0H3BZN1	Uncharacterized protein OS=Streptococcus pyogenes serotype M49 (strain NZ131) OX=471876 GN=Spy49_1218c	TVENLTASKERLTLD	S	63	4											3	1
A0A0H3BZN1	Uncharacterized protein OS=Streptococcus pyogenes serotype M49 (strain NZ131) OX=471876 GN=Spy49_1218c	VFDKAVESVETAVDK	S	34	3							1	1			1
A0A0H3BZP2	Arsenate reductase OS=Streptococcus pyogenes serotype M49 (strain NZ131) OX=471876 GN=arsC	YMKEDGESVNPIEVK	S	131	13	1	1	2		1	1	4		1	1	1
A0A0H3BZQ5	SSU ribosomal protein S1p OS=Streptococcus pyogenes serotype M49 (strain NZ131) OX=471876 GN=rpsA	EVEVKVLSIDEEAGR	S	249	11	1		1	1			1	1	1	1	2	2
A0A0H3BZQ5	SSU ribosomal protein S1p OS=Streptococcus pyogenes serotype M49 (strain NZ131) OX=471876 GN=rpsA	LRGFIPASMIDTRFV	S	136	8					1	1	1	1	1	1	1	1
A0A0H3BZQ5	SSU ribosomal protein S1p OS=Streptococcus pyogenes serotype M49 (strain NZ131) OX=471876 GN=rpsA	AEVFSKISEGAVVTG	S	192	8				1	1		1	1	1	1	1	1
A0A0H3BZQ5	SSU ribosomal protein S1p OS=Streptococcus pyogenes serotype M49 (strain NZ131) OX=471876 GN=rpsA	RAVKGGLSIEFEGLR	S	123	4					1		1	1				1
A0A0H3BZQ5	SSU ribosomal protein S1p OS=Streptococcus pyogenes serotype M49 (strain NZ131) OX=471876 GN=rpsA	ERNVSPKSVVSVGEE	S	235	3					1	1						1
A0A0H3BZQ5	SSU ribosomal protein S1p OS=Streptococcus pyogenes serotype M49 (strain NZ131) OX=471876 GN=rpsA	EARAEVFSKISEGAV	S	189	3							1				2
A0A0H3BZQ5	SSU ribosomal protein S1p OS=Streptococcus pyogenes serotype M49 (strain NZ131) OX=471876 GN=rpsA	ENPKDVLSVGQEVTV	S	324	3							1	1				1
A0A0H3BZR7	Mid-cell-anchored protein Z OS=Streptococcus pyogenes serotype M49 (strain NZ131) OX=471876 GN=mapZ	DQFLSEDSHHPAKQN	S	167	22			2	4	1	2	5	4			3	1
A0A0H3BZR7	Mid-cell-anchored protein Z OS=Streptococcus pyogenes serotype M49 (strain NZ131) OX=471876 GN=mapZ	PKRDQFLSEDSHHPA	S	164	18					3	2	5	4	2		1	1
A0A0H3BZR7	Mid-cell-anchored protein Z OS=Streptococcus pyogenes serotype M49 (strain NZ131) OX=471876 GN=mapZ	ESKEVEVTKESQTLG	T	11	16	1		5	2	2		2	2			1	1
A0A0H3BZR7	Mid-cell-anchored protein Z OS=Streptococcus pyogenes serotype M49 (strain NZ131) OX=471876 GN=mapZ	------MSEESKEVE	S	2	11	1		2		1		1		4	1	1
A0A0H3BZR7	Mid-cell-anchored protein Z OS=Streptococcus pyogenes serotype M49 (strain NZ131) OX=471876 GN=mapZ	YTELDTASLDNFIKK	S	75	8					1	1	1	1	1	1	1	1
A0A0H3BZR7	Mid-cell-anchored protein Z OS=Streptococcus pyogenes serotype M49 (strain NZ131) OX=471876 GN=mapZ	SEIKAGVTKDDSILD	T	42	8	1		1	1	1		1	1			1	1
A0A0H3BZR7	Mid-cell-anchored protein Z OS=Streptococcus pyogenes serotype M49 (strain NZ131) OX=471876 GN=mapZ	QKFDAKYTELDTASL	T	69	7	1				1	1	1		1	1	1
A0A0H3BZR7	Mid-cell-anchored protein Z OS=Streptococcus pyogenes serotype M49 (strain NZ131) OX=471876 GN=mapZ	---MSEESKEVEVTK	S	5	6	1		2		1	1	1
A0A0H3BZR7	Mid-cell-anchored protein Z OS=Streptococcus pyogenes serotype M49 (strain NZ131) OX=471876 GN=mapZ	AKYTELDTASLDNFI	T	73	4					1	1	1	1
A0A0H3BZR7	Mid-cell-anchored protein Z OS=Streptococcus pyogenes serotype M49 (strain NZ131) OX=471876 GN=mapZ	EVTKESQTLGLNEAK	T	16	4					2		1	1
A0A0H3BZS4	dTDP-4-dehydrorhamnose 3,5-epimerase OS=Streptococcus pyogenes serotype M49 (strain NZ131) OX=471876 GN=rmlC	GETFGNVYQTVIDAS	Y	109	8				2			1	1	1	1	1	1
A0A0H3BZS4	dTDP-4-dehydrorhamnose 3,5-epimerase OS=Streptococcus pyogenes serotype M49 (strain NZ131) OX=471876 GN=rmlC	------MTETFFDKP	T	2	4								2				2
A0A0H3BZS5	Putative amino acid ABC transproter OS=Streptococcus pyogenes serotype M49 (strain NZ131) OX=471876 GN=Spy49_1287c	AKSLGMTSVQVYRRG	S	165	5					1	1			1	1	1
A0A0H3BZS5	Putative amino acid ABC transproter OS=Streptococcus pyogenes serotype M49 (strain NZ131) OX=471876 GN=Spy49_1287c	GEIEAAKSLGMTSVQ	S	160	3									1	1	1
A0A0H3BZT0	Uncharacterized protein OS=Streptococcus pyogenes serotype M49 (strain NZ131) OX=471876 GN=Spy49_1297c	YREAFYISNENKAKQ	S	282	5					1	1			1	1	1
A0A0H3BZT5	Peptide chain release factor 2 OS=Streptococcus pyogenes serotype M49 (strain NZ131) OX=471876 GN=prfB	NIAAQKTSQELNELK	S	17	5							1		1	1	2
A0A0H3BZV5	PTS system, lactose-specific IIA component (EIIA-Lac) (Lactose-permease IIA component) (Phosphotransferase enzyme II, A component) OS=Streptococcus pyogenes serotype M49 (strain NZ131) OX=471876 GN=lacF	DAHNAQTSLLQKEAA	S	59	7				2	1	1					1	2
A0A0H3BZV5	PTS system, lactose-specific IIA component (EIIA-Lac) (Lactose-permease IIA component) (Phosphotransferase enzyme II, A component) OS=Streptococcus pyogenes serotype M49 (strain NZ131) OX=471876 GN=lacF	AYAGDARSKFLEALK	S	22	6					1	1	1		2		1
A0A0H3BZV5	PTS system, lactose-specific IIA component (EIIA-Lac) (Lactose-permease IIA component) (Phosphotransferase enzyme II, A component) OS=Streptococcus pyogenes serotype M49 (strain NZ131) OX=471876 GN=lacF	EELIAAGSDCLNDAH	S	47	2								1				1
A0A0H3BZW4	Streptolysin S export ATP-binding protein (SagG) OS=Streptococcus pyogenes serotype M49 (strain NZ131) OX=471876 GN=sagG	------MSFVQLTNV	S	2	6					1	1	1		1	1	1
A0A0H3BZW4	Streptolysin S export ATP-binding protein (SagG) OS=Streptococcus pyogenes serotype M49 (strain NZ131) OX=471876 GN=sagG	TVGIDPQSRNHILES	S	169	2											2
A0A0H3BZW4	Streptolysin S export ATP-binding protein (SagG) OS=Streptococcus pyogenes serotype M49 (strain NZ131) OX=471876 GN=sagG	LADKPDWSLIEDGEK	S	252	2											2
A0A0H3BZX9	PTS system, mannose-specific IIC component OS=Streptococcus pyogenes serotype M49 (strain NZ131) OX=471876 GN=manM	NGGNAAGSADPIGDI	S	258	53	1			2	4	4	8	8	2	2	11	11
A0A0H3BZX9	PTS system, mannose-specific IIC component OS=Streptococcus pyogenes serotype M49 (strain NZ131) OX=471876 GN=manM	IGDILEDY-------	Y	269	16								5			4	7
A0A0H3BZY3	3-oxoacyl-[acyl-carrier-protein] synthase 2 OS=Streptococcus pyogenes serotype M49 (strain NZ131) OX=471876 GN=fabF	GPITKFDTTDYAVKN	T	43	5					1		1	1			1	1
A0A0H3BZZ0	CRISPR-associated endonuclease Cas9 OS=Streptococcus pyogenes serotype M49 (strain NZ131) OX=471876 GN=cas9	ANLDKVLSAYNKHRD	S	1292	3									1		2
A0A0H3BZZ3	Teichoic acid export ATP-binding protein tagH OS=Streptococcus pyogenes serotype M49 (strain NZ131) OX=471876 GN=rgpDc	DDLSALDSASGLYQR	S	387	2												2
A0A0H3C000	Putative phosphotransferase system (PTS), enzyme II component C OS=Streptococcus pyogenes serotype M49 (strain NZ131) OX=471876 GN=Spy49_0835	SKQTTFDSKESEEED	S	234	2											2
A0A0H3C002	Uncharacterized protein OS=Streptococcus pyogenes serotype M49 (strain NZ131) OX=471876 GN=Spy49_1390c	HRLMDSDTIETPRSY	T	308	7	1		1		1		1		1	1		1
A0A0H3C002	Uncharacterized protein OS=Streptococcus pyogenes serotype M49 (strain NZ131) OX=471876 GN=Spy49_1390c	TPRSYTISEAGYRSG	S	318	5					1	1		1			1	1
A0A0H3C004	Uncharacterized protein OS=Streptococcus pyogenes serotype M49 (strain NZ131) OX=471876 GN=Spy49_0627	EEKIVDDTIGTRTRK	T	14	10	1	1	1		1	1	2		1	1	1
A0A0H3C005	Succinate-semialdehyde dehydrogenase NADP OS=Streptococcus pyogenes serotype M49 (strain NZ131) OX=471876 GN=Spy49_0841	GSERGGASIAEEAGK	S	214	2											1	1
A0A0H3C022	Dipeptide transport ATP-binding protein dppD OS=Streptococcus pyogenes serotype M49 (strain NZ131) OX=471876 GN=dppD	QDFLKGVTHDLRG--	T	262	4					1	1	2
A0A0H3C049	Spi SpeB protease inhibitor OS=Streptococcus pyogenes serotype M49 (strain NZ131) OX=471876 GN=Spy49_1689c	LNHDNVRSMIEAYQK	S	88	15			3		2	1	4		2		2	1
A0A0H3C052	NADH oxidase OS=Streptococcus pyogenes serotype M49 (strain NZ131) OX=471876 GN=nox1	YMESPVQSIDYDAKT	S	83	6				1			1	1			1	2
A0A0H3C052	NADH oxidase OS=Streptococcus pyogenes serotype M49 (strain NZ131) OX=471876 GN=nox1	TNYIALASNAVRTGI	S	311	5					1	1		1			1	1
A0A0H3C0A4	Phosphate transport ATP-binding protein pstB OS=Streptococcus pyogenes serotype M49 (strain NZ131) OX=471876 GN=pstB	LKGIRDKSILDHAVE	S	119	4					1	1			1	1
A0A0H3C0B4	Uncharacterized protein OS=Streptococcus pyogenes serotype M49 (strain NZ131) OX=471876 GN=Spy49_0994c	AKLDKLASQNALELA	S	107	12			2		2	2	2	2			2
A0A0H3C0C0	30S ribosomal protein S14 OS=Streptococcus pyogenes serotype M49 (strain NZ131) OX=471876 GN=rpsN2	KAKGDYESLRKLPRD	S	35	17					5	5	7
A0A0H3C0C8	Putative alkaline-shock protein OS=Streptococcus pyogenes serotype M49 (strain NZ131) OX=471876 GN=asp	AIKDNFQSLLRKENY	S	48	3			1				1				1
A0A0H3C0D5	Dihydrolipoamide acetyltransferase component of pyruvate dehydrogenase complex OS=Streptococcus pyogenes serotype M49 (strain NZ131) OX=471876 GN=acoC	GIDLATVSGTGFNGK	S	196	8					1	1	1	1			2	2
A0A0H3C0D5	Dihydrolipoamide acetyltransferase component of pyruvate dehydrogenase complex OS=Streptococcus pyogenes serotype M49 (strain NZ131) OX=471876 GN=acoC	APKENVASPAPQVAA	S	115	2												2
A0A0H3C0F1	Teichoic acid D-alanyltransferase OS=Streptococcus pyogenes serotype M49 (strain NZ131) OX=471876 GN=dltB	HRKKKGLSPLFQSRA	S	377	2							1				1
A0A0H3C0F2	Tagatose 1,6-diphosphate aldolase OS=Streptococcus pyogenes serotype M49 (strain NZ131) OX=471876 GN=lacD2	LLLAYEKTGYDATTT	T	95	9	1	1	1				1		1		2	2
A0A0H3C0F2	Tagatose 1,6-diphosphate aldolase OS=Streptococcus pyogenes serotype M49 (strain NZ131) OX=471876 GN=lacD2	EKISDNASPEFAKVK	S	177	6							1	1	1	1	1	1
A0A0H3C0G3	Uncharacterized protein OS=Streptococcus pyogenes serotype M49 (strain NZ131) OX=471876 GN=Spy49_1599c	AGSHPQTSQINVGEF	S	68	4											2	2
A0A0H3C0G3	Uncharacterized protein OS=Streptococcus pyogenes serotype M49 (strain NZ131) OX=471876 GN=Spy49_1599c	VEKDIADSTVIVSYT	S	234	4											2	2
A0A0H3C0H8	2-amino-4-hydroxy-6-hydroxymethyldihydropteridine diphosphokinase OS=Streptococcus pyogenes serotype M49 (strain NZ131) OX=471876 GN=folK	ETQAIEQSLGRVRHE	S	80	8					1	1	1	1	1	1	1	1
A0A0H3C0J7	Phosphocarrier protein HPr OS=Streptococcus pyogenes serotype M49 (strain NZ131) OX=471876 GN=ptsH	QTASKFASDITLDYK	S	31	11	1		1	1	1	1	1	1	1	1	1	1
A0A0H3C0J7	Phosphocarrier protein HPr OS=Streptococcus pyogenes serotype M49 (strain NZ131) OX=471876 GN=ptsH	ASDITLDYKGKAVNL	Y	37	7	1						1	1	1	1	1	1
A0A0H3C0R9	Phosphopantothenoylcysteine synthetase OS=Streptococcus pyogenes serotype M49 (strain NZ131) OX=471876 GN=dpfB	ISNNEVASADTKEAI	S	211	5					1		1		1	1	1
A0A0H3C0S1	Putative sugar ABC transporter OS=Streptococcus pyogenes serotype M49 (strain NZ131) OX=471876 GN=Spy49_0972c	TLGFEIRSVGLNPHA	S	223	10							2		2	2	4
A0A0H3C0S1	Putative sugar ABC transporter OS=Streptococcus pyogenes serotype M49 (strain NZ131) OX=471876 GN=Spy49_0972c	VGLNPHASEYAGMSS	S	231	3					1						2
A0A0H3C0V3	Glutamine--fructose-6-phosphate aminotransferase [isomerizing] OS=Streptococcus pyogenes serotype M49 (strain NZ131) OX=471876 GN=glmS	ELIRDSYTAELDLSD	T	236	2					1			1
A0A0H3C0V3	Glutamine--fructose-6-phosphate aminotransferase [isomerizing] OS=Streptococcus pyogenes serotype M49 (strain NZ131) OX=471876 GN=glmS	YTAELDLSDIGKGTY	S	242	2					1			1
A0A0H3C0V7	Putative ABC transporter OS=Streptococcus pyogenes serotype M49 (strain NZ131) OX=471876 GN=Spy49_1021	AIDDLTITIPNGKII	T	26	2							1				1
A0A0H3C0Z0	Putative ABC transporter OS=Streptococcus pyogenes serotype M49 (strain NZ131) OX=471876 GN=Spy49_1298c	NQTIDSFSHGMRQKV	S	134	15					1		2	2	2	2	2	4
A0A0H3C0Z3	Uncharacterized protein OS=Streptococcus pyogenes serotype M49 (strain NZ131) OX=471876 GN=Spy49_1787c	------MSDAFTDVA	S	2	2			1				1
A0A0H3C114	Inosine-5'-monophosphate dehydrogenase OS=Streptococcus pyogenes serotype M49 (strain NZ131) OX=471876 GN=guaB	SDRYFQGSVNEANKL	S	411	12	1	1	1	1	1	1	1	1	1	1	1	1
A0A0H3C114	Inosine-5'-monophosphate dehydrogenase OS=Streptococcus pyogenes serotype M49 (strain NZ131) OX=471876 GN=guaB	IGPGSICTTRVVAGV	T	311	9					2	1	1	1	1	1	1	1
A0A0H3C114	Inosine-5'-monophosphate dehydrogenase OS=Streptococcus pyogenes serotype M49 (strain NZ131) OX=471876 GN=guaB	IHKNMSITEQAEEVR	T	81	9					1	1		3			1	3
A0A0H3C114	Inosine-5'-monophosphate dehydrogenase OS=Streptococcus pyogenes serotype M49 (strain NZ131) OX=471876 GN=guaB	KLPLVDNSGRLSGLI	S	194	8			1		1	1	1		1	1		2
A0A0H3C114	Inosine-5'-monophosphate dehydrogenase OS=Streptococcus pyogenes serotype M49 (strain NZ131) OX=471876 GN=guaB	GVIHKNMSITEQAEE	S	79	5								1			1	3
A0A0H3C114	Inosine-5'-monophosphate dehydrogenase OS=Streptococcus pyogenes serotype M49 (strain NZ131) OX=471876 GN=guaB	LMQRYRISGVPIVET	S	123	5					2							3
A0A0H3C114	Inosine-5'-monophosphate dehydrogenase OS=Streptococcus pyogenes serotype M49 (strain NZ131) OX=471876 GN=guaB	KKGSSDRYFQGSVNE	Y	407	3											2	1
A0A0H3C114	Inosine-5'-monophosphate dehydrogenase OS=Streptococcus pyogenes serotype M49 (strain NZ131) OX=471876 GN=guaB	AAMKKGSSDRYFQGS	S	404	2									2
A0A0H3C120	Uncharacterized protein OS=Streptococcus pyogenes serotype M49 (strain NZ131) OX=471876 GN=Spy49_1351c	DENALENSIGFNSKM	S	325	4					1	1					2
A0A0H3C124	Putative mannose-specific phosphotransferase system component IID OS=Streptococcus pyogenes serotype M49 (strain NZ131) OX=471876 GN=manN	SEITKDMSGGILQDI	S	174	25	2	1	2	2	2	2	5	3	2		3	1
A0A0H3C124	Putative mannose-specific phosphotransferase system component IID OS=Streptococcus pyogenes serotype M49 (strain NZ131) OX=471876 GN=manN	ALKKLYTSPEDRATA	S	50	16	1	1	2		2	2	3	1	2	1	1
A0A0H3C124	Putative mannose-specific phosphotransferase system component IID OS=Streptococcus pyogenes serotype M49 (strain NZ131) OX=471876 GN=manN	PALKKLYTSPEDRAT	T	49	10					1	1	1	1	2	1	3
A0A0H3C124	Putative mannose-specific phosphotransferase system component IID OS=Streptococcus pyogenes serotype M49 (strain NZ131) OX=471876 GN=manN	RSQFLQGSWNYERMQ	S	25	3							1	1				1
A0A0H3C124	Putative mannose-specific phosphotransferase system component IID OS=Streptococcus pyogenes serotype M49 (strain NZ131) OX=471876 GN=manN	TSPEDRATALERHME	T	56	2								1				1
A0A0H3C129	3-oxoacyl-[acyl-carrier-protein] reductase OS=Streptococcus pyogenes serotype M49 (strain NZ131) OX=471876 GN=fabG	KMQEQILSQIPMKRI	S	204	8	1			1	1	1	1	1				2
A0A0H3C178	Putative putative C3-degrading proteinase OS=Streptococcus pyogenes serotype M49 (strain NZ131) OX=471876 GN=cppA	LQGTDLPSLEKDATF	S	136	4	1			1			1	1
A0A0H3C190	Transcriptional regulator, biotin repressor family OS=Streptococcus pyogenes serotype M49 (strain NZ131) OX=471876 GN=Spy49_1142c	PLNIKTHSDVTNFMS	S	119	7					1				2	1	3
A0A0H3C1A0	Arginine repressor OS=Streptococcus pyogenes serotype M49 (strain NZ131) OX=471876 GN=argR	QGPRSIKSTILAVSD	S	81	2							2
A0A0H3C1B0	Uncharacterized protein OS=Streptococcus pyogenes serotype M49 (strain NZ131) OX=471876 GN=Spy49_1166	KIVIPGQSKTLHTNN	S	83	5			1				2		1	1
A0A0H3C1B5	Cell division protein SepF OS=Streptococcus pyogenes serotype M49 (strain NZ131) OX=471876 GN=sepF	REQYQQSTCSDQTTI	T	121	10			2	2			2	2				2
A0A0H3C1B5	Cell division protein SepF OS=Streptococcus pyogenes serotype M49 (strain NZ131) OX=471876 GN=sepF	RRKRMSTSSIANRRE	S	108	9							1	1	2	1	2	2
A0A0H3C1B5	Cell division protein SepF OS=Streptococcus pyogenes serotype M49 (strain NZ131) OX=471876 GN=sepF	RREQYQQSTCSDQTT	S	120	4							2	2
A0A0H3C1B5	Cell division protein SepF OS=Streptococcus pyogenes serotype M49 (strain NZ131) OX=471876 GN=sepF	VDRRKRMSTSSIANR	S	106	2					1		1
A0A0H3C1B5	Cell division protein SepF OS=Streptococcus pyogenes serotype M49 (strain NZ131) OX=471876 GN=sepF	DRRKRMSTSSIANRR	T	107	2							2
A0A0H3C1C5	Putative peroxide resistance protein OS=Streptococcus pyogenes serotype M49 (strain NZ131) OX=471876 GN=Spy49_1183c	----MTNTLVENIYA	T	4	7					1		2				2	2
A0A0H3C1C5	Putative peroxide resistance protein OS=Streptococcus pyogenes serotype M49 (strain NZ131) OX=471876 GN=Spy49_1183c	LVENIYASVTHNISK	S	12	3								2				1
A0A0H3C1C5	Putative peroxide resistance protein OS=Streptococcus pyogenes serotype M49 (strain NZ131) OX=471876 GN=Spy49_1183c	ASVTHNISKKEASKN	S	18	3					1		2
A0A0H3C1E7	Valine--tRNA ligase OS=Streptococcus pyogenes serotype M49 (strain NZ131) OX=471876 GN=valS	EGRKMSKSLGNGIDP	S	523	3					1		1	1
A0A0H3C1H3	Fructose-bisphosphate aldolase class II OS=Streptococcus pyogenes serotype M49 (strain NZ131) OX=471876 GN=fba	PIVLHGGSGIPDDQI	S	211	20	1	1	3	2	1	1	3	2	1	1	2	2
A0A0H3C1H3	Fructose-bisphosphate aldolase class II OS=Streptococcus pyogenes serotype M49 (strain NZ131) OX=471876 GN=fba	VAKVNVNTESQIAFS	T	233	17	1		1	1	2	2	2	2	1	1	2	2
A0A0H3C1H3	Fructose-bisphosphate aldolase class II OS=Streptococcus pyogenes serotype M49 (strain NZ131) OX=471876 GN=fba	APVLIQTSMGAAKYM	S	50	11	2	2	2	1	1	1	1	1
A0A0H3C1H3	Fructose-bisphosphate aldolase class II OS=Streptococcus pyogenes serotype M49 (strain NZ131) OX=471876 GN=fba	KVNVNTESQIAFSNA	S	235	4								2			1	1
A0A0H3C1H3	Fructose-bisphosphate aldolase class II OS=Streptococcus pyogenes serotype M49 (strain NZ131) OX=471876 GN=fba	YEANEAEYDGKKLFD	Y	257	2												2
A0A0H3C1H6	Cysteine synthase OS=Streptococcus pyogenes serotype M49 (strain NZ131) OX=471876 GN=cysM	PHKIQGISAGFIPNT	S	225	10					1	1	2	2			2	2
A0A0H3C1H6	Cysteine synthase OS=Streptococcus pyogenes serotype M49 (strain NZ131) OX=471876 GN=cysM	FIPNTLDTKAYDQII	T	235	9					1			2	1	1	2	2
A0A0H3C1H6	Cysteine synthase OS=Streptococcus pyogenes serotype M49 (strain NZ131) OX=471876 GN=cysM	DNGERYLSTELYDVP	S	301	4							1	1			1	1
A0A0H3C1H6	Cysteine synthase OS=Streptococcus pyogenes serotype M49 (strain NZ131) OX=471876 GN=cysM	DQIIRVKSKDALETA	S	246	2					1							1
A0A0H3C1K3	Thioredoxin reductase OS=Streptococcus pyogenes serotype M49 (strain NZ131) OX=471876 GN=nox2	KFNVENIYGIVQKIE	Y	76	5					1	1	2				1
A0A0H3C1K3	Thioredoxin reductase OS=Streptococcus pyogenes serotype M49 (strain NZ131) OX=471876 GN=nox2	CVLTEDASYEAKTVI	S	97	4							1		1	1	1
A0A0H3C1M5	Putative Sodium-dependent phosphate transporter OS=Streptococcus pyogenes serotype M49 (strain NZ131) OX=471876 GN=Spy49_1316c	VVKYEALYLDRLLIT	Y	327	2									1	1
A0A0H3C1P7	Transcription termination/antitermination protein NusA OS=Streptococcus pyogenes serotype M49 (strain NZ131) OX=471876 GN=nusA	KDALAISSAYELGDK	S	85	6					1	1	1	1			1	1
A0A0H3C1P7	Transcription termination/antitermination protein NusA OS=Streptococcus pyogenes serotype M49 (strain NZ131) OX=471876 GN=nusA	RIDIKSASEYDRLEA	S	356	4									1	1	1	1
A0A0H3C1Q9	ATPase, AAA family OS=Streptococcus pyogenes serotype M49 (strain NZ131) OX=471876 GN=Spy49_1655	RDGHYAGSKDLGNAK	S	363	4	1	1			1	1
A0A0H3C1S0	CsbD domain-containing protein OS=Streptococcus pyogenes serotype M49 (strain NZ131) OX=471876 GN=Spy49_1665c	KSKIEQASGGLKEGA	S	14	40	3	3	7	4	3	2	4	4	3	1	3	3
A0A0H3C1S0	CsbD domain-containing protein OS=Streptococcus pyogenes serotype M49 (strain NZ131) OX=471876 GN=Spy49_1665c	MSEEKLKSKIEQASG	S	8	20	2	2	3	3	2	2	3	3
A0A0H3C1S0	CsbD domain-containing protein OS=Streptococcus pyogenes serotype M49 (strain NZ131) OX=471876 GN=Spy49_1665c	KEGAGKLTGDKELEA	T	25	17	3	2	2	2	2	2	3	1
A0A0H3C1S1	Chaperone protein DnaJ OS=Streptococcus pyogenes serotype M49 (strain NZ131) OX=471876 GN=dnaJ	GMMRRQVTCDICHGS	T	189	15					1	1	2	2			5	4
A0A0H3C1S1	Chaperone protein DnaJ OS=Streptococcus pyogenes serotype M49 (strain NZ131) OX=471876 GN=dnaJ	KPGTAPVTCRKCHGS	T	163	7					2		2		1		2
A0A0H3C1S1	Chaperone protein DnaJ OS=Streptococcus pyogenes serotype M49 (strain NZ131) OX=471876 GN=dnaJ	VSYNREATCGTCSGS	T	146	5					1				2		2
A0A0H3C1S1	Chaperone protein DnaJ OS=Streptococcus pyogenes serotype M49 (strain NZ131) OX=471876 GN=dnaJ	AYETLSDSQKRAAYD	S	59	3								2			1
A0A0H3C1W1	Multimodular transpeptidase-transglycosylase OS=Streptococcus pyogenes serotype M49 (strain NZ131) OX=471876 GN=pbp2A	PNANHLDSSATKNSE	S	47	3	1				2
A0A0H3C1X8	Putative endopeptidase O OS=Streptococcus pyogenes serotype M49 (strain NZ131) OX=471876 GN=pepO	YQSLKSFSEFVANIA	S	100	5					1	1	1	1			1
A0A0H3C219	Uncharacterized protein OS=Streptococcus pyogenes serotype M49 (strain NZ131) OX=471876 GN=Spy49_1782	EAASEIISNVLGKHL	S	60	7			1		1	1	1		1	1	1
A0A0H3C228	L-serine dehydratase OS=Streptococcus pyogenes serotype M49 (strain NZ131) OX=471876 GN=sdhA	KGNSLSDTTILNAVR	T	88	6			1				1				2	2
A0A0H3C268	6-phospho-beta-galactosidase OS=Streptococcus pyogenes serotype M49 (strain NZ131) OX=471876 GN=lacG	LFKDSGYSGEIGVVH	S	218	7				1	1				1	1	1	2
A0A0H3C276	Galactose-6-phosphate isomerase subunit LacA OS=Streptococcus pyogenes serotype M49 (strain NZ131) OX=471876 GN=lacA2	ARIITLGSEISAPGI	S	106	7					2	1	1	1			1	1
A0A0H3C276	Galactose-6-phosphate isomerase subunit LacA OS=Streptococcus pyogenes serotype M49 (strain NZ131) OX=471876 GN=lacA2	GMVAAEVSDERSAYM	S	85	4							1	1			1	1
A0A0H3C276	Galactose-6-phosphate isomerase subunit LacA OS=Streptococcus pyogenes serotype M49 (strain NZ131) OX=471876 GN=lacA2	KYEVVDVSENEVRDF	S	33	2							1					1
A0A0H3C276	Galactose-6-phosphate isomerase subunit LacA OS=Streptococcus pyogenes serotype M49 (strain NZ131) OX=471876 GN=lacA2	ITLGSEISAPGIAKN	S	109	2					1			1
A0A0H3C281	50S ribosomal protein L13 OS=Streptococcus pyogenes serotype M49 (strain NZ131) OX=471876 GN=rplM	PGGLKSITAGELRSK	T	90	8	1		1		3	1	2
A0A0H3C281	50S ribosomal protein L13 OS=Streptococcus pyogenes serotype M49 (strain NZ131) OX=471876 GN=rplM	DKVYYTHSMYPGGLK	S	80	6					2	2	2
A0A0H3C281	50S ribosomal protein L13 OS=Streptococcus pyogenes serotype M49 (strain NZ131) OX=471876 GN=rplM	MYPGGLKSITAGELR	S	88	3			1				2
A0A0H3C281	50S ribosomal protein L13 OS=Streptococcus pyogenes serotype M49 (strain NZ131) OX=471876 GN=rplM	KGMLPHNTLGRAQGM	T	115	2					1	1
A0A0H3C281	50S ribosomal protein L13 OS=Streptococcus pyogenes serotype M49 (strain NZ131) OX=471876 GN=rplM	RLSAVVASVLRGKNK	S	36	2			1				1
A0A0H3C2K4	Alkyl hydroperoxide reductase C OS=Streptococcus pyogenes serotype M49 (strain NZ131) OX=471876 GN=ahpC	GAETLTPSLDLVGKI	S	179	17			1	1	2	1	1	4	1	1	1	4
A0A0H3C2K4	Alkyl hydroperoxide reductase C OS=Streptococcus pyogenes serotype M49 (strain NZ131) OX=471876 GN=ahpC	YHDGKFITVTNEDVK	T	23	6							1	1	1	1	1	1
A0A0H3C2K4	Alkyl hydroperoxide reductase C OS=Streptococcus pyogenes serotype M49 (strain NZ131) OX=471876 GN=ahpC	GKEIAEFSAQAYHDG	S	12	6								2			2	2
A0A0H3C2K4	Alkyl hydroperoxide reductase C OS=Streptococcus pyogenes serotype M49 (strain NZ131) OX=471876 GN=ahpC	KEGAETLTPSLDLVG	T	177	3					1	1		1
A0A0H3C2P8	Uncharacterized protein OS=Streptococcus pyogenes serotype M49 (strain NZ131) OX=471876 GN=Spy49_1748c	DEFIRKETIELANDG	T	13	15	2	1	2		2	2	2		1	1	2
A0A0H3C2S7	Uncharacterized protein OS=Streptococcus pyogenes serotype M49 (strain NZ131) OX=471876 GN=Spy49_1801c	KKDSDIKSVTEIVEE	S	87	18	1	1	1	1	1	1	2	2	2	1	3	2
A0A0H3C2S7	Uncharacterized protein OS=Streptococcus pyogenes serotype M49 (strain NZ131) OX=471876 GN=Spy49_1801c	EKLLSHQSMGYGQPL	S	110	14	2	1	2	2	3				1	1		2
A0A0H3C2S7	Uncharacterized protein OS=Streptococcus pyogenes serotype M49 (strain NZ131) OX=471876 GN=Spy49_1801c	EVSKNKETLVIPVKT	T	125	12	1	1	2		2	2	2	2
A0A0H3C2S7	Uncharacterized protein OS=Streptococcus pyogenes serotype M49 (strain NZ131) OX=471876 GN=Spy49_1801c	VKTVGLDSKSPLKTI	S	137	11	1	1	2	2			2	2				1
A0A0H3C2S7	Uncharacterized protein OS=Streptococcus pyogenes serotype M49 (strain NZ131) OX=471876 GN=Spy49_1801c	LKTISPVSQFKSNNR	S	148	7	1	1	1		1		1		1	1
A0A0H3C2S7	Uncharacterized protein OS=Streptococcus pyogenes serotype M49 (strain NZ131) OX=471876 GN=Spy49_1801c	KSPLKTISPVSQFKS	S	145	6					2	1			1	1	1
A0A0H3C2S7	Uncharacterized protein OS=Streptococcus pyogenes serotype M49 (strain NZ131) OX=471876 GN=Spy49_1801c	DSKSPLKTISPVSQF	T	143	5					3			2
A0A0H3C2S7	Uncharacterized protein OS=Streptococcus pyogenes serotype M49 (strain NZ131) OX=471876 GN=Spy49_1801c	---MSEKSLGEVLRE	S	5	2							1				1
A0A0H3C2S7	Uncharacterized protein OS=Streptococcus pyogenes serotype M49 (strain NZ131) OX=471876 GN=Spy49_1801c	DSDIKSVTEIVEEKL	T	89	2					1		1
B5XHV3	Translation initiation factor IF-2 OS=Streptococcus pyogenes serotype M49 (strain NZ131) OX=471876 GN=infB	LRNSRVATGEAGGIT	T	483	9			1	1			2	2			1	2
B5XHV3	Translation initiation factor IF-2 OS=Streptococcus pyogenes serotype M49 (strain NZ131) OX=471876 GN=infB	ISSFSKASKPDVTAS	S	54	8				2				2			2	2
B5XHV3	Translation initiation factor IF-2 OS=Streptococcus pyogenes serotype M49 (strain NZ131) OX=471876 GN=infB	HREAALKSIEEAETK	S	273	5					1			2				2
B5XHV3	Translation initiation factor IF-2 OS=Streptococcus pyogenes serotype M49 (strain NZ131) OX=471876 GN=infB	GQKKNKKSWNSQNQV	S	322	3					1		1	1
B5XHV3	Translation initiation factor IF-2 OS=Streptococcus pyogenes serotype M49 (strain NZ131) OX=471876 GN=infB	KKIISSFSKASKPDV	S	51	2							1				1
B5XHX4	Serine--tRNA ligase OS=Streptococcus pyogenes serotype M49 (strain NZ131) OX=471876 GN=serS	GFSAAKTYDVEVWIP	Y	334	14					1	1	2	2	2	2	2	2
B5XHX4	Serine--tRNA ligase OS=Streptococcus pyogenes serotype M49 (strain NZ131) OX=471876 GN=serS	KAERNIASAAIAQAK	S	56	12	1	1	1	1	1	1	1	1	1	1	1	1
B5XHX4	Serine--tRNA ligase OS=Streptococcus pyogenes serotype M49 (strain NZ131) OX=471876 GN=serS	KLKKRGVSEDTLTHL	S	24	6					1		1	1	1		1	1
B5XHZ0	Chaperone protein DnaK OS=Streptococcus pyogenes serotype M49 (strain NZ131) OX=471876 GN=dnaK	ELKAAQESGNLDDMK	S	548	16	1		1	1	1	1	1	1	4	2	2	1
B5XHZ0	Chaperone protein DnaK OS=Streptococcus pyogenes serotype M49 (strain NZ131) OX=471876 GN=dnaK	EQHIVIKSNDGLSEE	S	473	15	1				2		3	3	1	1	2	2
B5XHZ0	Chaperone protein DnaK OS=Streptococcus pyogenes serotype M49 (strain NZ131) OX=471876 GN=dnaK	TERDAAQSALDELKA	S	537	13	1		1	1	1	1	2	2	1	1	2
B5XHZ0	Chaperone protein DnaK OS=Streptococcus pyogenes serotype M49 (strain NZ131) OX=471876 GN=dnaK	KLIDRNTTIPTSKSQ	T	387	10			2		1	1	2		1	1	2
B5XHZ0	Chaperone protein DnaK OS=Streptococcus pyogenes serotype M49 (strain NZ131) OX=471876 GN=dnaK	TLGRFQLTDIPAAPR	T	430	8					1	1	1	1	1	1	1	1
B5XHZ0	Chaperone protein DnaK OS=Streptococcus pyogenes serotype M49 (strain NZ131) OX=471876 GN=dnaK	IKSNDGLSEEEIDRM	S	478	8					1	1	1	1	1	1	1	1
B5XHZ0	Chaperone protein DnaK OS=Streptococcus pyogenes serotype M49 (strain NZ131) OX=471876 GN=dnaK	EGAQANDSANNDDVV	S	594	8							2	2			2	2
B5XHZ0	Chaperone protein DnaK OS=Streptococcus pyogenes serotype M49 (strain NZ131) OX=471876 GN=dnaK	TEGKGFDTERDAAQS	T	530	5					1			2				2
B5XHZ0	Chaperone protein DnaK OS=Streptococcus pyogenes serotype M49 (strain NZ131) OX=471876 GN=dnaK	KENGIDLSQDKMALQ	S	223	3					1	1		1
B5XHZ0	Chaperone protein DnaK OS=Streptococcus pyogenes serotype M49 (strain NZ131) OX=471876 GN=dnaK	MGTSEKVSANGKEYT	S	78	2							2
B5XHZ8	Aspartyl/glutamyl-tRNA(Asn/Gln) amidotransferase subunit B OS=Streptococcus pyogenes serotype M49 (strain NZ131) OX=471876 GN=gatB	LKNLNSFSNVRKGLE	S	220	3					1	1						1
B5XI03	GTP-sensing transcriptional pleiotropic repressor CodY OS=Streptococcus pyogenes serotype M49 (strain NZ131) OX=471876 GN=codY	EKTRKITSILQRSVD	S	13	4	1	1	1		1
B5XI03	GTP-sensing transcriptional pleiotropic repressor CodY OS=Streptococcus pyogenes serotype M49 (strain NZ131) OX=471876 GN=codY	NEGRLTASVIADRIG	S	208	4			1		1		1	1
B5XI23	Protein translocase subunit SecA OS=Streptococcus pyogenes serotype M49 (strain NZ131) OX=471876 GN=secA	QSQQSANTDDLPKVE	T	809	20	1	1	2	2	2	2	2	2	1	1	2	2
B5XI23	Protein translocase subunit SecA OS=Streptococcus pyogenes serotype M49 (strain NZ131) OX=471876 GN=secA	SYADQMASLSDRDLQ	S	35	7					1	1		1			2	2
B5XI23	Protein translocase subunit SecA OS=Streptococcus pyogenes serotype M49 (strain NZ131) OX=471876 GN=secA	QNIQSQQSANTDDLP	S	806	7			1	1	1		2	2
B5XI23	Protein translocase subunit SecA OS=Streptococcus pyogenes serotype M49 (strain NZ131) OX=471876 GN=secA	TMEGRRFSDGLHQAI	S	331	5					1	1		2				1
B5XI23	Protein translocase subunit SecA OS=Streptococcus pyogenes serotype M49 (strain NZ131) OX=471876 GN=secA	AAPQNIQSQQSANTD	S	803	4								1	1		2
B5XI23	Protein translocase subunit SecA OS=Streptococcus pyogenes serotype M49 (strain NZ131) OX=471876 GN=secA	MFVKTLTSVDYVIDV	S	247	2											1	1
B5XI32	Elongation factor P OS=Streptococcus pyogenes serotype M49 (strain NZ131) OX=471876 GN=efp	TAEGTYVSRA-----	S	183	20	1		2	2	2	2	2	1	1	1	3	3
B5XI32	Elongation factor P OS=Streptococcus pyogenes serotype M49 (strain NZ131) OX=471876 GN=efp	LRDVRTGSTFDTTYR	S	48	19	2	2	2	2	2	1	1	1	2	2	2
B5XI32	Elongation factor P OS=Streptococcus pyogenes serotype M49 (strain NZ131) OX=471876 GN=efp	TVPAQYLYKMDDTAY	Y	74	4								2				2
B5XI40	30S ribosomal protein S6 OS=Streptococcus pyogenes serotype M49 (strain NZ131) OX=471876 GN=rpsF	ALVARFDSILTDNGA	S	28	21	1		2	2	1	1	2	3	2	1	2	4
B5XI40	30S ribosomal protein S6 OS=Streptococcus pyogenes serotype M49 (strain NZ131) OX=471876 GN=rpsF	WEKRRLAYEINDFRE	Y	50	3					1	1	1
B5XI61	Xaa-Pro dipeptidyl-peptidase OS=Streptococcus pyogenes serotype M49 (strain NZ131) OX=471876 GN=pepX	KNDMDALSFFQSEQE	S	68	9					1		2	2			2	2
B5XID8	Deoxyribose-phosphate aldolase OS=Streptococcus pyogenes serotype M49 (strain NZ131) OX=471876 GN=deoC	IKAAGGISSLEDAKT	S	188	2									1			1
B5XIF1	Phosphoglycerate kinase OS=Streptococcus pyogenes serotype M49 (strain NZ131) OX=471876 GN=pgk	TAHRAHASNVGISAN	S	161	7					2	1	2	2
B5XIF1	Phosphoglycerate kinase OS=Streptococcus pyogenes serotype M49 (strain NZ131) OX=471876 GN=pgk	DTEGEAVSEGFLGLD	S	291	7					1			2			2	2
B5XIF1	Phosphoglycerate kinase OS=Streptococcus pyogenes serotype M49 (strain NZ131) OX=471876 GN=pgk	GLDIGPKSIAEFDQA	S	303	6					1	1	1	1			1	1
B5XIF1	Phosphoglycerate kinase OS=Streptococcus pyogenes serotype M49 (strain NZ131) OX=471876 GN=pgk	EADKEGKSLAPVAAD	S	73	5					1	1		1	1			1
B5XIF1	Phosphoglycerate kinase OS=Streptococcus pyogenes serotype M49 (strain NZ131) OX=471876 GN=pgk	SIIGGGDSAAAAINL	S	357	4					1	1		1				1
B5XIF1	Phosphoglycerate kinase OS=Streptococcus pyogenes serotype M49 (strain NZ131) OX=471876 GN=pgk	DVDGKKESKNDEELG	S	129	3									1			2
B5XIF1	Phosphoglycerate kinase OS=Streptococcus pyogenes serotype M49 (strain NZ131) OX=471876 GN=pgk	VKQPGVKSIIGGGDS	S	350	3					1			1				1
B5XIF1	Phosphoglycerate kinase OS=Streptococcus pyogenes serotype M49 (strain NZ131) OX=471876 GN=pgk	DVVFPGVTRGAKLEE	T	95	2							1	1
B5XIG1	Trigger factor OS=Streptococcus pyogenes serotype M49 (strain NZ131) OX=471876 GN=tig	MPADQVRSLLSADML	S	400	11			1		1	1	2	2	1	1	2
B5XIG1	Trigger factor OS=Streptococcus pyogenes serotype M49 (strain NZ131) OX=471876 GN=tig	QPKIDVVSMEKGKEW	S	97	10					1	1	2		2	1	3
B5XIG1	Trigger factor OS=Streptococcus pyogenes serotype M49 (strain NZ131) OX=471876 GN=tig	EVITSTASVK-----	S	425	8					1	1	1	1	1	1	1	1
B5XIG1	Trigger factor OS=Streptococcus pyogenes serotype M49 (strain NZ131) OX=471876 GN=tig	VNVTFPESYQAEDLA	S	222	3								2				1
B5XIG1	Trigger factor OS=Streptococcus pyogenes serotype M49 (strain NZ131) OX=471876 GN=tig	IHEEVNRSVNEFMGN	S	317	3					1		1	1
B5XIG1	Trigger factor OS=Streptococcus pyogenes serotype M49 (strain NZ131) OX=471876 GN=tig	KAEGFEATDSEIEQE	T	376	2								2
B5XIJ1	30S ribosomal protein S9 OS=Streptococcus pyogenes serotype M49 (strain NZ131) OX=471876 GN=rpsI	NKKDVEEYIPHADLR	Y	38	4								2				2
B5XIJ1	30S ribosomal protein S9 OS=Streptococcus pyogenes serotype M49 (strain NZ131) OX=471876 GN=rpsI	VDPDFRDSLKRAGLL	S	97	3					1	1		1
B5XIK9	30S ribosomal protein S15 OS=Streptococcus pyogenes serotype M49 (strain NZ131) OX=471876 GN=rpsO	RYRELIQSLGLRR--	S	84	6			1		1	1	1		1	1
B5XIK9	30S ribosomal protein S15 OS=Streptococcus pyogenes serotype M49 (strain NZ131) OX=471876 GN=rpsO	KNEIIAQYARHEGDT	Y	15	2							2
B5XIW7	Chaperonin GroEL OS=Streptococcus pyogenes serotype M49 (strain NZ131) OX=471876 GN=groEL	NRIALIKSQLETTTS	S	349	50	3	2	3	5	4	3	6	5	4	4	6	5
B5XIW7	Chaperonin GroEL OS=Streptococcus pyogenes serotype M49 (strain NZ131) OX=471876 GN=groEL	SQLETTTSDFDREKL	S	356	26				3	2	2	3	3	4	3	3	3
B5XIW7	Chaperonin GroEL OS=Streptococcus pyogenes serotype M49 (strain NZ131) OX=471876 GN=groEL	IVEGSGSSEAIANRI	S	337	25	2	1			2	2	4	3	2	2	4	3
B5XIW7	Chaperonin GroEL OS=Streptococcus pyogenes serotype M49 (strain NZ131) OX=471876 GN=groEL	ELKDATMTALGQAAK	T	313	17			1	1	1	1	1	1	3	2	3	3
B5XIW7	Chaperonin GroEL OS=Streptococcus pyogenes serotype M49 (strain NZ131) OX=471876 GN=groEL	MAKDIKFSADARAAM	S	8	14	1	1	3		1	1	3				2	2
B5XIW7	Chaperonin GroEL OS=Streptococcus pyogenes serotype M49 (strain NZ131) OX=471876 GN=groEL	KAIAQPVSGKEAIAQ	S	138	14	1	1	2		1	1	2	2	2		1	1
B5XIW7	Chaperonin GroEL OS=Streptococcus pyogenes serotype M49 (strain NZ131) OX=471876 GN=groEL	GLELKDATMTALGQA	T	311	13					1	1	1	1	1	2	3	3
B5XIW7	Chaperonin GroEL OS=Streptococcus pyogenes serotype M49 (strain NZ131) OX=471876 GN=groEL	KSQLETTTSDFDREK	T	355	13					1	2	2		1	1	3	3
B5XIW7	Chaperonin GroEL OS=Streptococcus pyogenes serotype M49 (strain NZ131) OX=471876 GN=groEL	VLNKIRGTFSVVAVK	T	268	13			1		1	1	2	2	1	1	2	2
B5XIW7	Chaperonin GroEL OS=Streptococcus pyogenes serotype M49 (strain NZ131) OX=471876 GN=groEL	VLEKAFGSPLITNDG	S	45	3					1			1				1
B5XIW7	Chaperonin GroEL OS=Streptococcus pyogenes serotype M49 (strain NZ131) OX=471876 GN=groEL	IAQVAAVSSRSEKVG	S	150	3					1			1				1
B5XIW7	Chaperonin GroEL OS=Streptococcus pyogenes serotype M49 (strain NZ131) OX=471876 GN=groEL	GVITIEESRGMETEL	S	178	3				1				1				1
B5XIW7	Chaperonin GroEL OS=Streptococcus pyogenes serotype M49 (strain NZ131) OX=471876 GN=groEL	KVGAPTETALKEMKL	T	385	3							1	1				1
B5XIW7	Chaperonin GroEL OS=Streptococcus pyogenes serotype M49 (strain NZ131) OX=471876 GN=groEL	NKIRGTFSVVAVKAP	S	270	2							1				1
B5XIW7	Chaperonin GroEL OS=Streptococcus pyogenes serotype M49 (strain NZ131) OX=471876 GN=groEL	VIVEGSGSSEAIANR	S	336	2			1	1
B5XIW7	Chaperonin GroEL OS=Streptococcus pyogenes serotype M49 (strain NZ131) OX=471876 GN=groEL	LIKSQLETTTSDFDR	T	353	2											1	1
B5XIW8	Co-chaperonin GroES OS=Streptococcus pyogenes serotype M49 (strain NZ131) OX=471876 GN=groES	FDDEKEQTVGGFVLA	T	20	10			2	2	1		2	2				1
B5XIW8	Co-chaperonin GroES OS=Streptococcus pyogenes serotype M49 (strain NZ131) OX=471876 GN=groES	SDIIAIVTK------	T	95	6					1	1	1	1			1	1
B5XIX5	Imidazolonepropionase OS=Streptococcus pyogenes serotype M49 (strain NZ131) OX=471876 GN=hutI	STVRATRSASFDNLY	S	122	2											1	1
B5XIY2	Histidine ammonia-lyase OS=Streptococcus pyogenes serotype M49 (strain NZ131) OX=471876 GN=hutH	NTTVATQSRVQDPYT	S	274	16	1	1	2	2	1	1	1	1	1	1	2	2
B5XIY5	30S ribosomal protein S2 OS=Streptococcus pyogenes serotype M49 (strain NZ131) OX=471876 GN=rpsB	EAVADEATRAGQYFI	T	85	4					1	1	1	1
B5XIY5	30S ribosomal protein S2 OS=Streptococcus pyogenes serotype M49 (strain NZ131) OX=471876 GN=rpsB	---MAVISMKQLLEC	S	5	2											2
B5XIY6	Elongation factor Ts OS=Streptococcus pyogenes serotype M49 (strain NZ131) OX=471876 GN=tsf	YGSKAQLSDDVITAA	S	240	10					1	1	2	2			2	2
B5XIY6	Elongation factor Ts OS=Streptococcus pyogenes serotype M49 (strain NZ131) OX=471876 GN=tsf	KKANDFESEVAATMA	S	334	9					1						4	4
B5XIY6	Elongation factor Ts OS=Streptococcus pyogenes serotype M49 (strain NZ131) OX=471876 GN=tsf	TVEAYLDSVNAKAIA	S	308	8					1	1	1	1	1	1	1	1
B5XIY6	Elongation factor Ts OS=Streptococcus pyogenes serotype M49 (strain NZ131) OX=471876 GN=tsf	DSKTVEAYLDSVNAK	Y	305	6							1	1	2	1		1
B5XIY6	Elongation factor Ts OS=Streptococcus pyogenes serotype M49 (strain NZ131) OX=471876 GN=tsf	DEQHFGAYQHNGGRI	Y	156	4					1			2				1
B5XJ02	UPF0297 protein Spy49_1751c OS=Streptococcus pyogenes serotype M49 (strain NZ131) OX=471876 GN=Spy49_1751c	-MGFTDETVRFKLDD	T	7	18	3	2	3		2	1	3		2	1	1
B5XJ02	UPF0297 protein Spy49_1751c OS=Streptococcus pyogenes serotype M49 (strain NZ131) OX=471876 GN=Spy49_1751c	----MGFTDETVRFK	T	4	15	2	2	3				3		2	2	1
B5XJ09	DNA mismatch repair protein MutL OS=Streptococcus pyogenes serotype M49 (strain NZ131) OX=471876 GN=mutL	HATSKIKSQSDLFRI	S	83	2											2
B5XJ13	Phosphate acyltransferase OS=Streptococcus pyogenes serotype M49 (strain NZ131) OX=471876 GN=plsX	GDQTKINSYLIQSDR	S	45	2							1				1
B5XJ13	Phosphate acyltransferase OS=Streptococcus pyogenes serotype M49 (strain NZ131) OX=471876 GN=plsX	HTDEKIMSDDEPAKA	S	64	2									1		1
B5XJ35	30S ribosomal protein S10 OS=Streptococcus pyogenes serotype M49 (strain NZ131) OX=471876 GN=rpsJ	AGPVPLPTERSLYTI	T	44	7	1			1	1	1	1	1				1
B5XJ35	30S ribosomal protein S10 OS=Streptococcus pyogenes serotype M49 (strain NZ131) OX=471876 GN=rpsJ	LMKLDLPSGVNVEIK	S	94	5					1	1	1	1				1
B5XJ35	30S ribosomal protein S10 OS=Streptococcus pyogenes serotype M49 (strain NZ131) OX=471876 GN=rpsJ	VPLPTERSLYTIIRA	S	47	5			1				2				2
B5XJ35	30S ribosomal protein S10 OS=Streptococcus pyogenes serotype M49 (strain NZ131) OX=471876 GN=rpsJ	TATRTGATVAGPVPL	T	35	3			1				1	1
B5XJ35	30S ribosomal protein S10 OS=Streptococcus pyogenes serotype M49 (strain NZ131) OX=471876 GN=rpsJ	IVETATRTGATVAGP	T	32	2					1							1
B5XJ35	30S ribosomal protein S10 OS=Streptococcus pyogenes serotype M49 (strain NZ131) OX=471876 GN=rpsJ	ATHKYKDSREQFEMR	S	61	2					1		1
B5XJ36	50S ribosomal protein L3 OS=Streptococcus pyogenes serotype M49 (strain NZ131) OX=471876 GN=rplC	RYHRRPGSMGPVAPN	S	143	8					2	1	2	2				1
B5XJ36	50S ribosomal protein L3 OS=Streptococcus pyogenes serotype M49 (strain NZ131) OX=471876 GN=rplC	DDKREVLSNKPAKGH	S	61	3			1				1	1
B5XJ37	50S ribosomal protein L4 OS=Streptococcus pyogenes serotype M49 (strain NZ131) OX=471876 GN=rplD	FVAVEGLSFAAPKTA	S	130	6					1	1	1	1			1	1
B5XJ39	50S ribosomal protein L2 OS=Streptococcus pyogenes serotype M49 (strain NZ131) OX=471876 GN=rplB	IRPTVRGSVMNPNDH	S	223	21	2	2	4	2	3	2	4	2
B5XJ39	50S ribosomal protein L2 OS=Streptococcus pyogenes serotype M49 (strain NZ131) OX=471876 GN=rplB	LVRAAGASAQVLGQE	S	161	9			1	1	1	1	1	1	1		1	1
B5XJ39	50S ribosomal protein L2 OS=Streptococcus pyogenes serotype M49 (strain NZ131) OX=471876 GN=rplB	NGRRNMTSLDFAEIT	S	18	7					2	1	2	2
B5XJ39	50S ribosomal protein L2 OS=Streptococcus pyogenes serotype M49 (strain NZ131) OX=471876 GN=rplB	EVGQRIVSGPDADIK	S	118	4					2	2
B5XJ39	50S ribosomal protein L2 OS=Streptococcus pyogenes serotype M49 (strain NZ131) OX=471876 GN=rplB	PVGRKAPSTPWGKPA	S	247	3					1			2
B5XJ39	50S ribosomal protein L2 OS=Streptococcus pyogenes serotype M49 (strain NZ131) OX=471876 GN=rplB	DFAEITTSTPEKSLL	S	27	2				1								1
B5XJ40	30S ribosomal protein S19 OS=Streptococcus pyogenes serotype M49 (strain NZ131) OX=471876 GN=rpsS	KLGEFAPTRTYKGHA	T	77	8	1	1	2		1	1	2
B5XJ44	50S ribosomal protein L29 OS=Streptococcus pyogenes serotype M49 (strain NZ131) OX=471876 GN=rpmC	VKELRGLSQEELAKK	S	17	8					1	1	1		2	1	2
B5XJ45	30S ribosomal protein S17 OS=Streptococcus pyogenes serotype M49 (strain NZ131) OX=471876 GN=rpsQ	IMETRPLSATKRFRL	S	69	2					1	1
B5XJ47	50S ribosomal protein L24 OS=Streptococcus pyogenes serotype M49 (strain NZ131) OX=471876 GN=rplX	KKHQKPNTENPQGAI	T	49	19	1	1	2	2	2	1	2	2	1	1		4
B5XJ47	50S ribosomal protein L24 OS=Streptococcus pyogenes serotype M49 (strain NZ131) OX=471876 GN=rplX	KEAPIHVSNVQVLDK	S	66	13				2	4	3	2	2
B5XJ48	50S ribosomal protein L5 OS=Streptococcus pyogenes serotype M49 (strain NZ131) OX=471876 GN=rplE	RDFHGVPTKSFDGRG	T	120	6	1				2	1	2
B5XJ48	50S ribosomal protein L5 OS=Streptococcus pyogenes serotype M49 (strain NZ131) OX=471876 GN=rplE	MGVGDAVSNAKNLEK	S	46	5					2	1					1	1
B5XJ48	50S ribosomal protein L5 OS=Streptococcus pyogenes serotype M49 (strain NZ131) OX=471876 GN=rplE	AAELALISGQKPLIT	S	62	5					2	1		2
B5XJ48	50S ribosomal protein L5 OS=Streptococcus pyogenes serotype M49 (strain NZ131) OX=471876 GN=rplE	LITKAKKSIAGFRLR	S	74	5			2				2				1
B5XJ50	30S ribosomal protein S8 OS=Streptococcus pyogenes serotype M49 (strain NZ131) OX=471876 GN=rpsH	EVLEVPASNIKKGIA	S	30	5					1	1		2				1
B5XJ51	50S ribosomal protein L6 OS=Streptococcus pyogenes serotype M49 (strain NZ131) OX=471876 GN=rplF	TVVRPNDSKEMKTIH	S	58	9					2	1	4	2
B5XJ51	50S ribosomal protein L6 OS=Streptococcus pyogenes serotype M49 (strain NZ131) OX=471876 GN=rplF	AYIRSLRSPEPYKGK	S	153	4					1	1		2
B5XJ51	50S ribosomal protein L6 OS=Streptococcus pyogenes serotype M49 (strain NZ131) OX=471876 GN=rplF	QGTKLVLSVGKSHQD	S	106	3			1				2
B5XJ51	50S ribosomal protein L6 OS=Streptococcus pyogenes serotype M49 (strain NZ131) OX=471876 GN=rplF	IEIKVEGTEITVVRP	T	48	2												2
B5XJ51	50S ribosomal protein L6 OS=Streptococcus pyogenes serotype M49 (strain NZ131) OX=471876 GN=rplF	NNMVVGVSEGFKKDL	S	80	2								2
B5XJ52	50S ribosomal protein L18 OS=Streptococcus pyogenes serotype M49 (strain NZ131) OX=471876 GN=rplR	RAVAKGISEVVFDRG	S	89	10			1		2	1	2		1	1	2
B5XJ52	50S ribosomal protein L18 OS=Streptococcus pyogenes serotype M49 (strain NZ131) OX=471876 GN=rplR	DVSKGTKTEQAVVVG	T	69	9			2		2	1	2	2
B5XJ52	50S ribosomal protein L18 OS=Streptococcus pyogenes serotype M49 (strain NZ131) OX=471876 GN=rplR	RRVRGKLSGTADRPR	S	23	7	1	1			1	1	1		1	1
B5XJ55	50S ribosomal protein L15 OS=Streptococcus pyogenes serotype M49 (strain NZ131) OX=471876 GN=rplO	KAAKFSKSAEAAIIA	S	131	12	1	1	2		1	1	2	2			1	1
B5XJ55	50S ribosomal protein L15 OS=Streptococcus pyogenes serotype M49 (strain NZ131) OX=471876 GN=rplO	LGFEGGQTPLFRRIP	T	55	3					1		1					1
B5XJ57	Adenylate kinase OS=Streptococcus pyogenes serotype M49 (strain NZ131) OX=471876 GN=adk	EMGRLAKSYIDKGEL	S	51	24					3	3	2	4	2	2	4	4
B5XJ57	Adenylate kinase OS=Streptococcus pyogenes serotype M49 (strain NZ131) OX=471876 GN=adk	INIKVDPSCLVERLS	S	119	3									1	1	1
B5XJ60	30S ribosomal protein S13 OS=Streptococcus pyogenes serotype M49 (strain NZ131) OX=471876 GN=rpsM	IRVKDLTSDQEDAIR	S	50	31	1	1	1	2	4	1	3	3	3	3	5	4
B5XJ60	30S ribosomal protein S13 OS=Streptococcus pyogenes serotype M49 (strain NZ131) OX=471876 GN=rpsM	KRLMEIGSYRGIRHR	S	85	3					1	1	1
B5XJ61	30S ribosomal protein S11 OS=Streptococcus pyogenes serotype M49 (strain NZ131) OX=471876 GN=rpsK	GPGSGRESAIRALAA	S	93	14	1				2	1	2		2	2	2	2
B5XJ61	30S ribosomal protein S11 OS=Streptococcus pyogenes serotype M49 (strain NZ131) OX=471876 GN=rpsK	GFKGSRKSTPFAAQM	S	56	2								2
B5XJ63	50S ribosomal protein L17 OS=Streptococcus pyogenes serotype M49 (strain NZ131) OX=471876 GN=rplQ	YVRNEIASENYDEAA	S	72	13	1			1	2	1	1	3	1	1	1	1
B5XJ63	50S ribosomal protein L17 OS=Streptococcus pyogenes serotype M49 (strain NZ131) OX=471876 GN=rplQ	TALQKLFSEIAPRYA	S	93	7			1		1	1	1		1	1	1
B5XJ63	50S ribosomal protein L17 OS=Streptococcus pyogenes serotype M49 (strain NZ131) OX=471876 GN=rplQ	EAADKYTSTTALQKL	S	84	2					1	1
B5XJ63	50S ribosomal protein L17 OS=Streptococcus pyogenes serotype M49 (strain NZ131) OX=471876 GN=rplQ	DEAADKYTSTTALQK	T	83	2								2
B5XJ70	Tyrosine--tRNA ligase OS=Streptococcus pyogenes serotype M49 (strain NZ131) OX=471876 GN=tyrS	TGKKFGKSEGNAVWL	S	233	2								1			1
B5XJ72	DNA-directed RNA polymerase subunit beta OS=Streptococcus pyogenes serotype M49 (strain NZ131) OX=471876 GN=rpoB	AGTEMTRSVIESIEE	S	318	5					1			2				2
B5XJ72	DNA-directed RNA polymerase subunit beta OS=Streptococcus pyogenes serotype M49 (strain NZ131) OX=471876 GN=rpoB	AQETQEVSETTDEK-	S	1182	4	1								1		1	1
B5XJ77	Arginine--tRNA ligase OS=Streptococcus pyogenes serotype M49 (strain NZ131) OX=471876 GN=argS	EQVITAGSDYAQQDE	S	101	10					1	1	2	2			2	2
B5XJ77	Arginine--tRNA ligase OS=Streptococcus pyogenes serotype M49 (strain NZ131) OX=471876 GN=argS	TRILDDNSERDNRLV	S	532	7					1	1			3	1		1
B5XJ99	30S ribosomal protein S4 OS=Streptococcus pyogenes serotype M49 (strain NZ131) OX=471876 GN=rpsD	PNNRSKLSEYGLQLA	S	45	12	1		2	2	1	1	1	1	1		1	1
B5XJ99	30S ribosomal protein S4 OS=Streptococcus pyogenes serotype M49 (strain NZ131) OX=471876 GN=rpsD	VDPGQVISVREKSMK	S	141	10			1		1	1	1	1	2	1	1	1
B5XJ99	30S ribosomal protein S4 OS=Streptococcus pyogenes serotype M49 (strain NZ131) OX=471876 GN=rpsD	QSRRLGLSLTGTGKE	S	18	10	1		1		1	1	3	2			1
B5XJ99	30S ribosomal protein S4 OS=Streptococcus pyogenes serotype M49 (strain NZ131) OX=471876 GN=rpsD	MSRYTGPSWKQSRRL	S	8	8			2		1	1	2				2
B5XJ99	30S ribosomal protein S4 OS=Streptococcus pyogenes serotype M49 (strain NZ131) OX=471876 GN=rpsD	QHGPNNRSKLSEYGL	S	42	5					1			1	1			2
B5XJ99	30S ribosomal protein S4 OS=Streptococcus pyogenes serotype M49 (strain NZ131) OX=471876 GN=rpsD	------MSRYTGPSW	S	2	2					1	1
B5XJ99	30S ribosomal protein S4 OS=Streptococcus pyogenes serotype M49 (strain NZ131) OX=471876 GN=rpsD	KELARRNYVPGQHGP	Y	31	2					1	1
B5XJ99	30S ribosomal protein S4 OS=Streptococcus pyogenes serotype M49 (strain NZ131) OX=471876 GN=rpsD	RRLGLSLTGTGKELA	T	20	2	1		1
B5XJA2	50S ribosomal protein L9 OS=Streptococcus pyogenes serotype M49 (strain NZ131) OX=471876 GN=rplI	NLAKEATSQSIGELK	S	41	7	1	1	1		1	1	1				1
B5XJA2	50S ribosomal protein L9 OS=Streptococcus pyogenes serotype M49 (strain NZ131) OX=471876 GN=rplI	AKEATSQSIGELKGK	S	43	2					1		1
B5XJD9	Acetate kinase OS=Streptococcus pyogenes serotype M49 (strain NZ131) OX=471876 GN=ackA	KSGLSGVSGISSDMR	S	278	6					1		1	1			1	2
B5XJD9	Acetate kinase OS=Streptococcus pyogenes serotype M49 (strain NZ131) OX=471876 GN=ackA	VNMLNKKSGLSGVSG	S	272	5								1			1	3
B5XJD9	Acetate kinase OS=Streptococcus pyogenes serotype M49 (strain NZ131) OX=471876 GN=ackA	SGVSGISSDMRDIEA	S	282	3					1	1						1
B5XJD9	Acetate kinase OS=Streptococcus pyogenes serotype M49 (strain NZ131) OX=471876 GN=ackA	------MSKTIAINA	S	2	2											2
B5XJD9	Acetate kinase OS=Streptococcus pyogenes serotype M49 (strain NZ131) OX=471876 GN=ackA	LNKKSGLSGVSGISS	S	275	2											1	1
B5XJH8	Adenylosuccinate synthetase OS=Streptococcus pyogenes serotype M49 (strain NZ131) OX=471876 GN=purA	EVGHEYGTTTGRPRR	T	298	5					1		2	2
B5XJH8	Adenylosuccinate synthetase OS=Streptococcus pyogenes serotype M49 (strain NZ131) OX=471876 GN=purA	VGHEYGTTTGRPRRV	T	299	2					1	1
B5XJH8	Adenylosuccinate synthetase OS=Streptococcus pyogenes serotype M49 (strain NZ131) OX=471876 GN=purA	EDITGVRSLDELPEN	S	385	2							1				1
B5XJM0	Glucose-6-phosphate isomerase OS=Streptococcus pyogenes serotype M49 (strain NZ131) OX=471876 GN=pgi	VISKSGTTTEPAIAF	T	149	7	1		1		1		1		1	1	1
B5XJM0	Glucose-6-phosphate isomerase OS=Streptococcus pyogenes serotype M49 (strain NZ131) OX=471876 GN=pgi	------MSHITFDYS	S	2	2					1						1
B5XJM4	Glycerol-3-phosphate dehydrogenase [NAD(P)+] OS=Streptococcus pyogenes serotype M49 (strain NZ131) OX=471876 GN=gpsA	ESILGMMSNEFRSEN	S	328	14					4	3	1	1			1	4
B5XJR0	30S ribosomal protein S7 OS=Streptococcus pyogenes serotype M49 (strain NZ131) OX=471876 GN=rpsG	RARRVGGSNYQVPVE	S	83	20	1	1	2	2	2		2	2	2	2	2	2
B5XJR0	30S ribosomal protein S7 OS=Streptococcus pyogenes serotype M49 (strain NZ131) OX=471876 GN=rpsG	AANNTGASVKKREDT	S	134	18	2	2	2	1	2	3	3	1			1	1
B5XJR0	30S ribosomal protein S7 OS=Streptococcus pyogenes serotype M49 (strain NZ131) OX=471876 GN=rpsG	IMDAANNTGASVKKR	T	131	11	1	1	1	1	1		1	1	1	1	1	1
B5XJR0	30S ribosomal protein S7 OS=Streptococcus pyogenes serotype M49 (strain NZ131) OX=471876 GN=rpsG	TIVYDAFSAIKEATG	S	48	4					1	1		1				1
B5XJR0	30S ribosomal protein S7 OS=Streptococcus pyogenes serotype M49 (strain NZ131) OX=471876 GN=rpsG	RRVGGSNYQVPVEVR	Y	85	4					1	1						2
B5XJR0	30S ribosomal protein S7 OS=Streptococcus pyogenes serotype M49 (strain NZ131) OX=471876 GN=rpsG	LPDPLYNSKIVTRLI	S	20	4							2	2
B5XJR1	Elongation factor G OS=Streptococcus pyogenes serotype M49 (strain NZ131) OX=471876 GN=fusA	GMEAHGNSQIVRAYV	S	638	50	3	3	4	4	5	4	4	4	4	4	6	5
B5XJR1	Elongation factor G OS=Streptococcus pyogenes serotype M49 (strain NZ131) OX=471876 GN=fusA	SGVLNSGSYVMNTSK	S	338	20	2	2	1		2	2	1	1	2	2	3	2
B5XJR1	Elongation factor G OS=Streptococcus pyogenes serotype M49 (strain NZ131) OX=471876 GN=fusA	HDVDSSETAFKIAAS	T	578	17	2	1	2	2	1	1	2	2	1	1		2
B5XJR1	Elongation factor G OS=Streptococcus pyogenes serotype M49 (strain NZ131) OX=471876 GN=fusA	NVGAPQVSYRETFRA	S	480	16	1	1	2	2	1	1	1	1	1	1	2	2
B5XJR1	Elongation factor G OS=Streptococcus pyogenes serotype M49 (strain NZ131) OX=471876 GN=fusA	KAKLYDGSYHDVDSS	S	569	14				2	2	2	2	2	1	1		2
B5XJR1	Elongation factor G OS=Streptococcus pyogenes serotype M49 (strain NZ131) OX=471876 GN=fusA	HYEDVPKSVQEEIIK	S	680	12			2		1	1	2	2			2	2
B5XJR1	Elongation factor G OS=Streptococcus pyogenes serotype M49 (strain NZ131) OX=471876 GN=fusA	DEDLMMKYLEGEEIT	Y	229	11					2	1	2	2			2	2
B5XJR1	Elongation factor G OS=Streptococcus pyogenes serotype M49 (strain NZ131) OX=471876 GN=fusA	ILQMHANSRQEIETV	S	361	8			1		1		1	1	1	1	1	1
B5XJR1	Elongation factor G OS=Streptococcus pyogenes serotype M49 (strain NZ131) OX=471876 GN=fusA	GETHEGASQMDWMEQ	S	48	8					1	1	2	2				2
B5XJR1	Elongation factor G OS=Streptococcus pyogenes serotype M49 (strain NZ131) OX=471876 GN=fusA	YRETFRASTQARGFF	S	488	5					1	1		2	1
B5XJR1	Elongation factor G OS=Streptococcus pyogenes serotype M49 (strain NZ131) OX=471876 GN=fusA	KIGADFLYSVQTLHD	Y	146	5					1			2			1	1
B5XJR1	Elongation factor G OS=Streptococcus pyogenes serotype M49 (strain NZ131) OX=471876 GN=fusA	LTFFRVYSGVLNSGS	S	331	3					1			1				1
B5XJR1	Elongation factor G OS=Streptococcus pyogenes serotype M49 (strain NZ131) OX=471876 GN=fusA	KDTTTGDSLTDEKAK	S	387	3									1		1	1
B5XJR1	Elongation factor G OS=Streptococcus pyogenes serotype M49 (strain NZ131) OX=471876 GN=fusA	QEQERGITITSAATT	T	62	2								2
B5XJR1	Elongation factor G OS=Streptococcus pyogenes serotype M49 (strain NZ131) OX=471876 GN=fusA	VGLKDTTTGDSLTDE	T	384	2							1		1
B5XJU2	Probable transcriptional regulatory protein Spy49_0265 OS=Streptococcus pyogenes serotype M49 (strain NZ131) OX=471876 GN=Spy49_0265	NGGNMGASGSVSYLF	S	124	7					1			1				5
B5XJU2	Probable transcriptional regulatory protein Spy49_0265 OS=Streptococcus pyogenes serotype M49 (strain NZ131) OX=471876 GN=Spy49_0265	KLIDALESDDDVQKV	S	224	5					1	1		1			1	1
B5XJU2	Probable transcriptional regulatory protein Spy49_0265 OS=Streptococcus pyogenes serotype M49 (strain NZ131) OX=471876 GN=Spy49_0265	IDKAKGNTDETFVEG	T	75	5							1	1			2	1
B5XJW0	GTPase Der OS=Streptococcus pyogenes serotype M49 (strain NZ131) OX=471876 GN=der	GEDRVIASPVAGTTR	S	203	4					1	1	1				1
B5XJX2	UPF0154 protein Spy49_0296 OS=Streptococcus pyogenes serotype M49 (strain NZ131) OX=471876 GN=Spy49_0296	SQMGQKPSEAKIQQT	S	56	59	1	1	2		9	6	3	2	15	11	9
B5XJY9	Probable manganese-dependent inorganic pyrophosphatase OS=Streptococcus pyogenes serotype M49 (strain NZ131) OX=471876 GN=ppaC	QVNTVDISEVLERQE	S	227	5					1	1		1			1	1
B5XJY9	Probable manganese-dependent inorganic pyrophosphatase OS=Streptococcus pyogenes serotype M49 (strain NZ131) OX=471876 GN=ppaC	MALLKAGTNLASKSE	T	191	4								2				2
B5XJY9	Probable manganese-dependent inorganic pyrophosphatase OS=Streptococcus pyogenes serotype M49 (strain NZ131) OX=471876 GN=ppaC	KAGTNLASKSEVELI	S	195	2												2
B5XJZ7	Uracil phosphoribosyltransferase OS=Streptococcus pyogenes serotype M49 (strain NZ131) OX=471876 GN=upp	VDIQTPVSKTVQKQL	S	60	3					1							2
B5XK03	Initiation-control protein YabA OS=Streptococcus pyogenes serotype M49 (strain NZ131) OX=471876 GN=Spy49_0329	AMKKQVQSLVEENTI	S	33	3					1	1					1
B5XK49	Bifunctional protein GlmU OS=Streptococcus pyogenes serotype M49 (strain NZ131) OX=471876 GN=glmU	------MTNYAIILA	T	2	7					2	1	1	1			1	1
B5XK61	50S ribosomal protein L11 OS=Streptococcus pyogenes serotype M49 (strain NZ131) OX=471876 GN=rplK	RSMGFTVTD------	T	140	8							2				4	2
B5XK61	50S ribosomal protein L11 OS=Streptococcus pyogenes serotype M49 (strain NZ131) OX=471876 GN=rplK	DKSFDFITKTPPAAV	T	70	2							1				1
B5XK62	50S ribosomal protein L1 OS=Streptococcus pyogenes serotype M49 (strain NZ131) OX=471876 GN=rplA	NPKTGTVTMDVAKAV	T	146	11	1				2		2		2	1	3
B5XK62	50S ribosomal protein L1 OS=Streptococcus pyogenes serotype M49 (strain NZ131) OX=471876 GN=rplA	AMVLPNGTGKTQRVL	T	69	2												2
B5XK64	Ribosome-recycling factor OS=Streptococcus pyogenes serotype M49 (strain NZ131) OX=471876 GN=frr	RFAQSHQSLSREYAS	S	19	17			2	2	2		3	2	3	1	2
B5XK64	Ribosome-recycling factor OS=Streptococcus pyogenes serotype M49 (strain NZ131) OX=471876 GN=frr	RAGRANASLLDRIQV	S	35	11	1	1	2		2	1	2		1		1
B5XK64	Ribosome-recycling factor OS=Streptococcus pyogenes serotype M49 (strain NZ131) OX=471876 GN=frr	ITPANDGSVIRLVIP	S	96	11				1	1	1	2	2			2	2
B5XK64	Ribosome-recycling factor OS=Streptococcus pyogenes serotype M49 (strain NZ131) OX=471876 GN=frr	EARVLLISPFDKSSI	S	68	8			1		1	1	1	1	1	1	1
B5XK64	Ribosome-recycling factor OS=Streptococcus pyogenes serotype M49 (strain NZ131) OX=471876 GN=frr	LDRIQVDYYGAPTPL	Y	44	6							2	2			1	1
B5XK64	Ribosome-recycling factor OS=Streptococcus pyogenes serotype M49 (strain NZ131) OX=471876 GN=frr	TPLNQLASITVPEAR	S	56	4							2	2
B5XK64	Ribosome-recycling factor OS=Streptococcus pyogenes serotype M49 (strain NZ131) OX=471876 GN=frr	LISPFDKSSIKDIER	S	73	2					1	1
B5XK64	Ribosome-recycling factor OS=Streptococcus pyogenes serotype M49 (strain NZ131) OX=471876 GN=frr	NASDLGITPANDGSV	T	90	2	1								1
B5XKA6	Threonine--tRNA ligase OS=Streptococcus pyogenes serotype M49 (strain NZ131) OX=471876 GN=thrS	CRGPHVPSTGRIQVF	S	186	5	1	1			1	1			1
B5XKA6	Threonine--tRNA ligase OS=Streptococcus pyogenes serotype M49 (strain NZ131) OX=471876 GN=thrS	MMHRYEKSGALSGLQ	S	367	4					1	1	1	1
B5XKG9	Lysine--tRNA ligase OS=Streptococcus pyogenes serotype M49 (strain NZ131) OX=471876 GN=lysS	------MSNQHIEEL	S	2	22	1	1	2	2	4	2	2	2	1	1	2	2
B5XKG9	Lysine--tRNA ligase OS=Streptococcus pyogenes serotype M49 (strain NZ131) OX=471876 GN=lysS	NDPIDQLSRFEAQAQ	S	432	14					3	2	2	3			2	2
B5XKI1	Elongation factor Tu OS=Streptococcus pyogenes serotype M49 (strain NZ131) OX=471876 GN=tuf	KGEVYILSKDEGGRH	S	317	29	1			2	5	2	2	4	3	3	3	4
B5XKI1	Elongation factor Tu OS=Streptococcus pyogenes serotype M49 (strain NZ131) OX=471876 GN=tuf	LARRLPTSVNQPKDY	S	43	21	2	2	3	1	2	2	4	2	1		2
B5XKI1	Elongation factor Tu OS=Streptococcus pyogenes serotype M49 (strain NZ131) OX=471876 GN=tuf	SIREGGRTVGSGIVS	T	387	20	2		1		2	1	2	3	2	2	2	3
B5XKI1	Elongation factor Tu OS=Streptococcus pyogenes serotype M49 (strain NZ131) OX=471876 GN=tuf	VEDVFSITGRGTVAS	T	225	16	1		1		2	2	2	2	1	1	2	2
B5XKI1	Elongation factor Tu OS=Streptococcus pyogenes serotype M49 (strain NZ131) OX=471876 GN=tuf	NQPKDYASIDAAPEE	S	52	16	1	1	1	1	1	1	2	2	1	1	2	2
B5XKI1	Elongation factor Tu OS=Streptococcus pyogenes serotype M49 (strain NZ131) OX=471876 GN=tuf	YETETRHYAHIDAPG	Y	80	15					4	2	2	2	1	1		3
B5XKI1	Elongation factor Tu OS=Streptococcus pyogenes serotype M49 (strain NZ131) OX=471876 GN=tuf	QVIAKPGSINPHTKF	S	302	14					2	1	2	2	2	1	2	2
B5XKI1	Elongation factor Tu OS=Streptococcus pyogenes serotype M49 (strain NZ131) OX=471876 GN=tuf	AKEKYDRSKPHVNIG	S	9	12	1		3	2	1	1	1		1	1		1
B5XKI1	Elongation factor Tu OS=Streptococcus pyogenes serotype M49 (strain NZ131) OX=471876 GN=tuf	TKFKGEVYILSKDEG	Y	314	10					1	1	2	2			2	2
B5XKI1	Elongation factor Tu OS=Streptococcus pyogenes serotype M49 (strain NZ131) OX=471876 GN=tuf	ETKKAVVTGVEMFRK	T	261	9			1		1	1	1	1	1	1	1	1
B5XKI1	Elongation factor Tu OS=Streptococcus pyogenes serotype M49 (strain NZ131) OX=471876 GN=tuf	SVNQPKDYASIDAAP	Y	50	8			1	1	1	1	1	1			1	1
B5XKI1	Elongation factor Tu OS=Streptococcus pyogenes serotype M49 (strain NZ131) OX=471876 GN=tuf	EGGRTVGSGIVSEIE	S	390	7							2	2			2	1
B5XKI1	Elongation factor Tu OS=Streptococcus pyogenes serotype M49 (strain NZ131) OX=471876 GN=tuf	TREHILLSRQVGVKH	S	126	6					1	1			2	1	1
B5XKI1	Elongation factor Tu OS=Streptococcus pyogenes serotype M49 (strain NZ131) OX=471876 GN=tuf	LPVEDVFSITGRGTV	S	223	6					2		1	1			1	1
B5XKI1	Elongation factor Tu OS=Streptococcus pyogenes serotype M49 (strain NZ131) OX=471876 GN=tuf	DLPVIQGSALKALEG	S	177	4							2	2
B5XKI1	Elongation factor Tu OS=Streptococcus pyogenes serotype M49 (strain NZ131) OX=471876 GN=tuf	TVGSGIVSEIEA---	S	394	4							2	2
B5XKI1	Elongation factor Tu OS=Streptococcus pyogenes serotype M49 (strain NZ131) OX=471876 GN=tuf	EERERGITINTAHVE	T	65	3							1	1				1
B5XKI1	Elongation factor Tu OS=Streptococcus pyogenes serotype M49 (strain NZ131) OX=471876 GN=tuf	ERGITINTAHVEYET	T	68	3								1				2
B5XKI1	Elongation factor Tu OS=Streptococcus pyogenes serotype M49 (strain NZ131) OX=471876 GN=tuf	KPHVNIGTIGHVDHG	T	17	2					1			1
B5XKI1	Elongation factor Tu OS=Streptococcus pyogenes serotype M49 (strain NZ131) OX=471876 GN=tuf	DAPGHADYVKNMITG	Y	91	2								2
B5XKI2	Triosephosphate isomerase OS=Streptococcus pyogenes serotype M49 (strain NZ131) OX=471876 GN=tpiA	VRVQYGGSVKPENVK	S	214	29	2	2	2	2	4	3	2	2	4	2	2	2
B5XKI2	Triosephosphate isomerase OS=Streptococcus pyogenes serotype M49 (strain NZ131) OX=471876 GN=tpiA	QNCYFENTGAFTGET	T	72	7				2	1			2				2
B5XKI2	Triosephosphate isomerase OS=Streptococcus pyogenes serotype M49 (strain NZ131) OX=471876 GN=tpiA	PIVCCGESLETYEAG	S	131	6							2	2				2
B5XKI2	Triosephosphate isomerase OS=Streptococcus pyogenes serotype M49 (strain NZ131) OX=471876 GN=tpiA	AFVEAVASKLPSTDL	S	29	5			1		1		1	1			1
B5XKI2	Triosephosphate isomerase OS=Streptococcus pyogenes serotype M49 (strain NZ131) OX=471876 GN=tpiA	------MSRKPIIAG	S	2	4					1	1	2
B5XKI2	Triosephosphate isomerase OS=Streptococcus pyogenes serotype M49 (strain NZ131) OX=471876 GN=tpiA	WAIGTGKSATQDDAQ	S	178	4					1			1			2
B5XKI2	Triosephosphate isomerase OS=Streptococcus pyogenes serotype M49 (strain NZ131) OX=471876 GN=tpiA	IGTGKSATQDDAQNM	T	180	3	1								2
B5XKI2	Triosephosphate isomerase OS=Streptococcus pyogenes serotype M49 (strain NZ131) OX=471876 GN=tpiA	TGAFTGETSPKVLAE	T	79	2												2
B5XKL7	50S ribosomal protein L31 type B OS=Streptococcus pyogenes serotype M49 (strain NZ131) OX=471876 GN=rpmE2	PLIRVEISSDSHPFY	S	50	2								2
B5XKL7	50S ribosomal protein L31 type B OS=Streptococcus pyogenes serotype M49 (strain NZ131) OX=471876 GN=rpmE2	LIRVEISSDSHPFYT	S	51	2								2
B5XKM2	50S ribosomal protein L19 OS=Streptococcus pyogenes serotype M49 (strain NZ131) OX=471876 GN=rplS	SRKGQGISEMYTVRK	S	56	14	1	1	3	2	2	2	3
B5XKM2	50S ribosomal protein L19 OS=Streptococcus pyogenes serotype M49 (strain NZ131) OX=471876 GN=rplS	MYTVRKISGGIGVER	S	65	4					2	1	1
B5XKM2	50S ribosomal protein L19 OS=Streptococcus pyogenes serotype M49 (strain NZ131) OX=471876 GN=rplS	-MNPLIQSLTEGQLR	S	7	3							1					2
B5XKM2	50S ribosomal protein L19 OS=Streptococcus pyogenes serotype M49 (strain NZ131) OX=471876 GN=rplS	LTEGQLRSDVPNFRP	S	15	2												2
B5XKM5	Septation ring formation regulator EzrA OS=Streptococcus pyogenes serotype M49 (strain NZ131) OX=471876 GN=ezrA	SFEAGVQSSFEHALR	S	524	12					2	2	2	2			2	2
B5XKM5	Septation ring formation regulator EzrA OS=Streptococcus pyogenes serotype M49 (strain NZ131) OX=471876 GN=ezrA	HIQERIDSLYEVFER	S	296	6					1	1	1	1			1	1
B5XKM5	Septation ring formation regulator EzrA OS=Streptococcus pyogenes serotype M49 (strain NZ131) OX=471876 GN=ezrA	QERIDSLYEVFEREI	Y	298	5					1	1		1			1	1
B5XKM5	Septation ring formation regulator EzrA OS=Streptococcus pyogenes serotype M49 (strain NZ131) OX=471876 GN=ezrA	SLHLIGQSQTSFREW	S	65	4								2				2
B5XKM5	Septation ring formation regulator EzrA OS=Streptococcus pyogenes serotype M49 (strain NZ131) OX=471876 GN=ezrA	SQFVALNSSGDPVEA	S	192	4							2	2
B5XKM5	Septation ring formation regulator EzrA OS=Streptococcus pyogenes serotype M49 (strain NZ131) OX=471876 GN=ezrA	KTLTNVESGQMDVFA	S	400	4					1			1				2
B5XKM5	Septation ring formation regulator EzrA OS=Streptococcus pyogenes serotype M49 (strain NZ131) OX=471876 GN=ezrA	ESIRANSSELVTLDL	S	273	2								1				1
B5XKM5	Septation ring formation regulator EzrA OS=Streptococcus pyogenes serotype M49 (strain NZ131) OX=471876 GN=ezrA	RINIEAVSRLSEVAT	S	478	2							1				1
B5XKM7	Enolase OS=Streptococcus pyogenes serotype M49 (strain NZ131) OX=471876 GN=eno	GMVPSGASTGEHEAV	S	42	21			2	2	4	2	4	2	1	1	1	2
B5XKM7	Enolase OS=Streptococcus pyogenes serotype M49 (strain NZ131) OX=471876 GN=eno	------MSIITDVYA	S	2	13	1	1	2		1	1	2	2	1		1	1
B5XKM7	Enolase OS=Streptococcus pyogenes serotype M49 (strain NZ131) OX=471876 GN=eno	TAVVSHRSGETEDST	S	374	10	1	2		2	2	1	1	1
B5XKM7	Enolase OS=Streptococcus pyogenes serotype M49 (strain NZ131) OX=471876 GN=eno	MVPSGASTGEHEAVE	T	43	9				1	1			2			2	3
B5XKM7	Enolase OS=Streptococcus pyogenes serotype M49 (strain NZ131) OX=471876 GN=eno	ERKVYDYTKFEGEGA	T	260	6							2	2				2
B5XKM7	Enolase OS=Streptococcus pyogenes serotype M49 (strain NZ131) OX=471876 GN=eno	LKERGLVTAVGDEGG	T	200	4					1		1	1				1
B5XKM7	Enolase OS=Streptococcus pyogenes serotype M49 (strain NZ131) OX=471876 GN=eno	TSAEQVDYLEELVNK	Y	278	2					1							1
B5XKP7	ATP synthase subunit b OS=Streptococcus pyogenes serotype M49 (strain NZ131) OX=471876 GN=atpF	QAEQSRLSAQQLEAK	S	58	26	1	1		2	2	2	4	2	2	2	4	4
B5XKP7	ATP synthase subunit b OS=Streptococcus pyogenes serotype M49 (strain NZ131) OX=471876 GN=atpF	AQSQLIDSYLDDLGE	S	156	10					1	1	2	2			2	2
B5XKP7	ATP synthase subunit b OS=Streptococcus pyogenes serotype M49 (strain NZ131) OX=471876 GN=atpF	DIDQAEQSRLSAQQL	S	55	8			1		1	1	2		2		1
B5XKP7	ATP synthase subunit b OS=Streptococcus pyogenes serotype M49 (strain NZ131) OX=471876 GN=atpF	SQASKIISDAKEIGQ	S	82	2							1				1
B5XKP9	ATP synthase subunit alpha OS=Streptococcus pyogenes serotype M49 (strain NZ131) OX=471876 GN=atpA	EAFTQFGSDLDAATQ	S	400	2												2
B5XKQ0	ATP synthase gamma chain OS=Streptococcus pyogenes serotype M49 (strain NZ131) OX=471876 GN=atpG	RDFQIYASKIRQITT	S	48	6					1	1			1	1	2
B5XKR6	30S ribosomal protein S21 OS=Streptococcus pyogenes serotype M49 (strain NZ131) OX=471876 GN=rpsU	TVVRKNESLDDALRR	S	11	26	1	1	3		4	2	3	1	4	3	3	1
B5XKT9	50S ribosomal protein L35 OS=Streptococcus pyogenes serotype M49 (strain NZ131) OX=471876 GN=rpmI	RKAGLVSSGDFKRIK	S	52	4							1		1		1	1
B5XKU0	50S ribosomal protein L20 OS=Streptococcus pyogenes serotype M49 (strain NZ131) OX=471876 GN=rplT	RMNGLSYSQLMHGLK	S	77	6					1	1	2	2
B5XKU5	UPF0342 protein Spy49_0636 OS=Streptococcus pyogenes serotype M49 (strain NZ131) OX=471876 GN=Spy49_0636	------MSQEIYDYA	S	2	8					1	1	2	2			2
B5XKV2	50S ribosomal protein L21 OS=Streptococcus pyogenes serotype M49 (strain NZ131) OX=471876 GN=rplU	-----MSTYAIIKTG	T	3	8					1	1	2		1	1	2
B5XKV2	50S ribosomal protein L21 OS=Streptococcus pyogenes serotype M49 (strain NZ131) OX=471876 GN=rplU	EGATVVGTVEKQGKQ	T	63	2												2
B5XKW7	30S ribosomal protein S16 OS=Streptococcus pyogenes serotype M49 (strain NZ131) OX=471876 GN=rpsP	DRVLEWLSKGAQPSD	S	61	3							2				1
B5XKW7	30S ribosomal protein S16 OS=Streptococcus pyogenes serotype M49 (strain NZ131) OX=471876 GN=rpsP	YRINVADSRAPRDGR	S	25	2							2
B5XL08	Phosphopentomutase OS=Streptococcus pyogenes serotype M49 (strain NZ131) OX=471876 GN=deoB	NRHDYAVSPFQDTVL	S	227	14				2	1	1		2	2	2	2	2
B5XL08	Phosphopentomutase OS=Streptococcus pyogenes serotype M49 (strain NZ131) OX=471876 GN=deoB	KIGLGNISRPIPLKT	S	62	13					2	1	2	2	1	1	2	2
B5XL08	Phosphopentomutase OS=Streptococcus pyogenes serotype M49 (strain NZ131) OX=471876 GN=deoB	MGHNKSNSHGIDTLI	S	270	9					1			2	1	1	2	2
B5XL08	Phosphopentomutase OS=Streptococcus pyogenes serotype M49 (strain NZ131) OX=471876 GN=deoB	PIPLKTISTEDNPTG	S	71	5							1	1	1	1	1
B5XL08	Phosphopentomutase OS=Streptococcus pyogenes serotype M49 (strain NZ131) OX=471876 GN=deoB	INDIFNGSGITNDMG	S	257	3								1				2
B5XLC6	Elongation factor 4 OS=Streptococcus pyogenes serotype M49 (strain NZ131) OX=471876 GN=lepA	RRRGDFVTMDYIDDN	T	440	9			2		2	1	1	1			1	1
B5XLC6	Elongation factor 4 OS=Streptococcus pyogenes serotype M49 (strain NZ131) OX=471876 GN=lepA	GDFVTMDYIDDNRVN	Y	443	5					1	1	1				2
B5XLE2	50S ribosomal protein L10 OS=Streptococcus pyogenes serotype M49 (strain NZ131) OX=471876 GN=rplJ	LRRSLRESGVEFKVI	S	49	8			2		1	1	3					1
B5XLE2	50S ribosomal protein L10 OS=Streptococcus pyogenes serotype M49 (strain NZ131) OX=471876 GN=rplJ	EFKVIKNSILTRAAE	S	59	8	1		2		2	1	2
B5XLE2	50S ribosomal protein L10 OS=Streptococcus pyogenes serotype M49 (strain NZ131) OX=471876 GN=rplJ	------MSEAIIAKK	S	2	5					1	1	2				1
B5XLE2	50S ribosomal protein L10 OS=Streptococcus pyogenes serotype M49 (strain NZ131) OX=471876 GN=rplJ	GPSAVAFSNEDVIAP	S	86	4							2	2
B5XLE2	50S ribosomal protein L10 OS=Streptococcus pyogenes serotype M49 (strain NZ131) OX=471876 GN=rplJ	ASIVVVDSRGLTVDQ	S	31	2							1	1
B5XLE8	GTP cyclohydrolase 1 OS=Streptococcus pyogenes serotype M49 (strain NZ131) OX=471876 GN=folE	MKKERLMSINKEKAE	S	8	2							2
B5XLI1	GMP reductase OS=Streptococcus pyogenes serotype M49 (strain NZ131) OX=471876 GN=guaC	KCIITSRSQADTSVT	S	26	7					1	1	1	1	1	1	1
B5XLI8	Peptide chain release factor 1 OS=Streptococcus pyogenes serotype M49 (strain NZ131) OX=471876 GN=prfA	QRVPVTESQGRVHTS	S	194	2							1				1
B5XLI8	Peptide chain release factor 1 OS=Streptococcus pyogenes serotype M49 (strain NZ131) OX=471876 GN=prfA	EELGELLSDPDVVSD	S	22	2					1							1
B5XLJ2	Serine hydroxymethyltransferase OS=Streptococcus pyogenes serotype M49 (strain NZ131) OX=471876 GN=glyA	GSVLTNKYAEGYPGN	Y	55	5			2				2				1
B5XLJ8	L-lactate dehydrogenase OS=Streptococcus pyogenes serotype M49 (strain NZ131) OX=471876 GN=ldh	SVRDAAYSIINKKGA	S	225	26	2	2	4		2	2	4	2	3	1	3	1
B5XLJ8	L-lactate dehydrogenase OS=Streptococcus pyogenes serotype M49 (strain NZ131) OX=471876 GN=ldh	ISVRDAAYSIINKKG	Y	224	5					1	1	3
B5XLJ8	L-lactate dehydrogenase OS=Streptococcus pyogenes serotype M49 (strain NZ131) OX=471876 GN=ldh	KIYAADYSDCHDADL	S	70	4								2				2
B5XLJ8	L-lactate dehydrogenase OS=Streptococcus pyogenes serotype M49 (strain NZ131) OX=471876 GN=ldh	GSGTSLDSARFRQAL	S	153	4					2		1	1
B5XLJ8	L-lactate dehydrogenase OS=Streptococcus pyogenes serotype M49 (strain NZ131) OX=471876 GN=ldh	FAKEEFASAAKN---	S	323	2											1	1
B5XLN9	GMP synthase [glutamine-hydrolyzing] OS=Streptococcus pyogenes serotype M49 (strain NZ131) OX=471876 GN=guaA	GNREYGQSTLHLRET	S	117	6					1	1	2	2
B5XLR6	30S ribosomal protein S20 OS=Streptococcus pyogenes serotype M49 (strain NZ131) OX=471876 GN=rpsT	KAFEANPSEELFRAA	S	40	6					1	1	1	1			1	1
B5XLR6	30S ribosomal protein S20 OS=Streptococcus pyogenes serotype M49 (strain NZ131) OX=471876 GN=rpsT	ELFRAASSSIDKAES	S	49	5	1	1	1		1						1
B5XLR6	30S ribosomal protein S20 OS=Streptococcus pyogenes serotype M49 (strain NZ131) OX=471876 GN=rpsT	LFRAASSSIDKAESK	S	50	3							1				2
B5XLR6	30S ribosomal protein S20 OS=Streptococcus pyogenes serotype M49 (strain NZ131) OX=471876 GN=rpsT	EELFRAASSSIDKAE	S	48	2					1		1
B5XLV6	ATP-dependent 6-phosphofructokinase OS=Streptococcus pyogenes serotype M49 (strain NZ131) OX=471876 GN=pfkA	KVASTIQYDFEHKGK	Y	207	5								2			1	2
B5XLV6	ATP-dependent 6-phosphofructokinase OS=Streptococcus pyogenes serotype M49 (strain NZ131) OX=471876 GN=pfkA	FDIEKVASTIQYDFE	S	203	4											2	2
B5XLV6	ATP-dependent 6-phosphofructokinase OS=Streptococcus pyogenes serotype M49 (strain NZ131) OX=471876 GN=pfkA	GDIFPLGSKEVGDKI	S	54	3					1			2
B5XLX3	D-alanyl carrier protein OS=Streptococcus pyogenes serotype M49 (strain NZ131) OX=471876 GN=dltC	FNIKVPISEFGRDDW	S	56	6					1	1	1		1	1	1
B5XLX5	D-alanine--D-alanyl carrier protein ligase OS=Streptococcus pyogenes serotype M49 (strain NZ131) OX=471876 GN=dltA	TFVALTKSGHAYIPV	S	76	4					1	1	1	1
B5XM21	Uridine kinase OS=Streptococcus pyogenes serotype M49 (strain NZ131) OX=471876 GN=udk	GGSGGGKTSVSRAIL	T	19	9	1	1	2		1	1	3
B5XM60	Peptide chain release factor 3 OS=Streptococcus pyogenes serotype M49 (strain NZ131) OX=471876 GN=prfC	----MSLTEEIKKRR	T	4	2									1	1
B5XM69	2,3-bisphosphoglycerate-dependent phosphoglycerate mutase OS=Streptococcus pyogenes serotype M49 (strain NZ131) OX=471876 GN=gpmA	FVGAHGNSIRALVKH	S	185	15					2	2	2	2	4	2	1
B5XM69	2,3-bisphosphoglycerate-dependent phosphoglycerate mutase OS=Streptococcus pyogenes serotype M49 (strain NZ131) OX=471876 GN=gpmA	QVHIWRRSYDVLPPA	S	116	3					1	1						1
B5XM82	Exodeoxyribonuclease 7 small subunit OS=Streptococcus pyogenes serotype M49 (strain NZ131) OX=471876 GN=xseB	VPLEEAISEFQKGML	S	33	3					1						2
B5XM83	Exodeoxyribonuclease 7 large subunit OS=Streptococcus pyogenes serotype M49 (strain NZ131) OX=471876 GN=xseA	LLMANMASQYDSQLA	S	374	3					1						2
B5XMA2	UDP-N-acetylglucosamine--N-acetylmuramyl-(pentapeptide) pyrophosphoryl-undecaprenol N-acetylglucosamine transferase OS=Streptococcus pyogenes serotype M49 (strain NZ131) OX=471876 GN=murG	DLLRADISSAIKEK-	S	354	12	1	1	2		1	1	2		1	1	2
B5XMC1	Ornithine carbamoyltransferase OS=Streptococcus pyogenes serotype M49 (strain NZ131) OX=471876 GN=arcB	------MTQVFQGRS	T	2	8			2				2		1	1	2
B5XMC3	Arginine deiminase OS=Streptococcus pyogenes serotype M49 (strain NZ131) OX=471876 GN=arcA	------MTAQTPIHV	T	2	19	1			2	2	2	2	2	2	2	2	2
B5XMC3	Arginine deiminase OS=Streptococcus pyogenes serotype M49 (strain NZ131) OX=471876 GN=arcA	ITNAILESKGLKLIK	S	379	10			1	1	1	1	1	1	1	1	1	1
B5XMC3	Arginine deiminase OS=Streptococcus pyogenes serotype M49 (strain NZ131) OX=471876 GN=arcA	VVVYNRNTITNAILE	T	371	8					1	1	1	1	1	1	1	1
B5XMC3	Arginine deiminase OS=Streptococcus pyogenes serotype M49 (strain NZ131) OX=471876 GN=arcA	AFIDEYLSEANIRGR	S	94	5					1		1	1			1	1
B5XMC3	Arginine deiminase OS=Streptococcus pyogenes serotype M49 (strain NZ131) OX=471876 GN=arcA	ELPEIPASEKGLTDL	S	139	4					1				1	1		1
B5XMC3	Arginine deiminase OS=Streptococcus pyogenes serotype M49 (strain NZ131) OX=471876 GN=arcA	QTPIHVYSEIGKLKK	S	11	4					1	1	2
B5XMJ7	Cell cycle protein GpsB OS=Streptococcus pyogenes serotype M49 (strain NZ131) OX=471876 GN=gpsB	AKYQARNTVSATVQQ	T	66	17	1	1	2	2	2	1	2	2	1	1		2
B5XMJ7	Cell cycle protein GpsB OS=Streptococcus pyogenes serotype M49 (strain NZ131) OX=471876 GN=gpsB	TRVAQSATNFDILKR	T	86	12	1	1	2	1	1	1	1	1	1	1		1
B5XMJ7	Cell cycle protein GpsB OS=Streptococcus pyogenes serotype M49 (strain NZ131) OX=471876 GN=gpsB	YQARNTVSATVQQPV	S	68	12	1		1	1			2	2		1	2	2
B5XMJ7	Cell cycle protein GpsB OS=Streptococcus pyogenes serotype M49 (strain NZ131) OX=471876 GN=gpsB	QPTRVAQSATNFDIL	S	84	11	1		1	1	1	1	1	1	1	1	1	1
B5XMJ7	Cell cycle protein GpsB OS=Streptococcus pyogenes serotype M49 (strain NZ131) OX=471876 GN=gpsB	ARNTVSATVQQPVPQ	T	70	8					1	1	1	1			2	2
B5XMJ7	Cell cycle protein GpsB OS=Streptococcus pyogenes serotype M49 (strain NZ131) OX=471876 GN=gpsB	QQPVPQPTRVAQSAT	T	79	4					1	1						2
B5XMM9	Glycine--tRNA ligase beta subunit OS=Streptococcus pyogenes serotype M49 (strain NZ131) OX=471876 GN=glyS	SYEADLRSQFVIADA	S	208	13			1		1	1	2	2	1	1	2	2
P0C096	Protein RecA OS=Streptococcus pyogenes serotype M49 (strain NZ131) OX=471876 GN=recA	IEIYGPESSGKTTVA	S	82	4					1	1		1	1
