# Supplementary material for: Dynamic Protein Phosphorylation in Streptococcus pyogenes during Growth, Stationary Phase, and Starvation
Source: Microorganisms. 2024 Mar 20;12(3):621. doi: 10.3390/microorganisms12030621 (PMC10975399; doi:10.3390/microorganisms12030621)
Supplement: Supplementary file 1 [file microorganisms-12-00621-s001.zip › Supplementary Table S4.xlsx]

## Sheet: Legend
Phosphoproteins whose phosphorylation sites have been localized
Column heading	Description
UniProt Acc. No.	UniProtKB Accession of the protein containing the phosphorylation site(s)
Protein name	Name of the protein containing the phosphorylation site(s)
Number of p-sites	Number of different phosphorylation sites in the protein

## Sheet: Proteine
UniProt Acc. No.	Protein name	Number of p-sites
B5XKI1	Elongation factor Tu OS=Streptococcus pyogenes serotype M49 (strain NZ131) OX=471876 GN=tuf	20
B5XIW7	Chaperonin GroEL OS=Streptococcus pyogenes serotype M49 (strain NZ131) OX=471876 GN=groEL	16
B5XJR1	Elongation factor G OS=Streptococcus pyogenes serotype M49 (strain NZ131) OX=471876 GN=fusA	15
A0A0H3BZJ0	Formate acetyltransferase OS=Streptococcus pyogenes serotype M49 (strain NZ131) OX=471876 GN=pfl	14
A0A0H3BY55	Non-specific serine/threonine protein kinase OS=Streptococcus pyogenes serotype M49 (strain NZ131) OX=471876 GN=Spy49_1257c	12
A0A0H3BZ23	Cell division protein FtsZ OS=Streptococcus pyogenes serotype M49 (strain NZ131) OX=471876 GN=ftsZ	12
A0A0H3BXI0	Uncharacterized protein OS=Streptococcus pyogenes serotype M49 (strain NZ131) OX=471876 GN=Spy49_1001c	11
A0A0H3BZL9	PTS system, fructose-specific IIABC component OS=Streptococcus pyogenes serotype M49 (strain NZ131) OX=471876 GN=fruA	10
A0A0H3BZR7	Mid-cell-anchored protein Z OS=Streptococcus pyogenes serotype M49 (strain NZ131) OX=471876 GN=mapZ	10
B5XHZ0	Chaperone protein DnaK OS=Streptococcus pyogenes serotype M49 (strain NZ131) OX=471876 GN=dnaK	10
A0A0H3BWH3	Putative calcium-transporting ATPase OS=Streptococcus pyogenes serotype M49 (strain NZ131) OX=471876 GN=pacL	9
A0A0H3BZC7	EIIAB-Man OS=Streptococcus pyogenes serotype M49 (strain NZ131) OX=471876 GN=manL	9
A0A0H3C2S7	Uncharacterized protein OS=Streptococcus pyogenes serotype M49 (strain NZ131) OX=471876 GN=Spy49_1801c	9
A0A0H3BW88	Archaeal S-adenosylmethionine synthetase OS=Streptococcus pyogenes serotype M49 (strain NZ131) OX=471876 GN=Spy49_0455	8
A0A0H3BXC6	Signal recognition particle receptor FtsY OS=Streptococcus pyogenes serotype M49 (strain NZ131) OX=471876 GN=ftsY	8
A0A0H3BZ03	R3H domain protein OS=Streptococcus pyogenes serotype M49 (strain NZ131) OX=471876 GN=Spy49_0209	8
A0A0H3BZ43	Uncharacterized protein OS=Streptococcus pyogenes serotype M49 (strain NZ131) OX=471876 GN=Spy49_1003c	8
A0A0H3C114	Inosine-5'-monophosphate dehydrogenase OS=Streptococcus pyogenes serotype M49 (strain NZ131) OX=471876 GN=guaB	8
B5XIF1	Phosphoglycerate kinase OS=Streptococcus pyogenes serotype M49 (strain NZ131) OX=471876 GN=pgk	8
B5XJ99	30S ribosomal protein S4 OS=Streptococcus pyogenes serotype M49 (strain NZ131) OX=471876 GN=rpsD	8
B5XK64	Ribosome-recycling factor OS=Streptococcus pyogenes serotype M49 (strain NZ131) OX=471876 GN=frr	8
B5XKI2	Triosephosphate isomerase OS=Streptococcus pyogenes serotype M49 (strain NZ131) OX=471876 GN=tpiA	8
B5XKM5	Septation ring formation regulator EzrA OS=Streptococcus pyogenes serotype M49 (strain NZ131) OX=471876 GN=ezrA	8
A0A0H3BYW2	EIICB-Lac OS=Streptococcus pyogenes serotype M49 (strain NZ131) OX=471876 GN=lacE	7
A0A0H3BZD6	Putative PTS system enzyme II OS=Streptococcus pyogenes serotype M49 (strain NZ131) OX=471876 GN=Spy49_1737c	7
A0A0H3BZQ5	SSU ribosomal protein S1p OS=Streptococcus pyogenes serotype M49 (strain NZ131) OX=471876 GN=rpsA	7
B5XKM7	Enolase OS=Streptococcus pyogenes serotype M49 (strain NZ131) OX=471876 GN=eno	7
A0A0H3BWF1	Protein translocase subunit SecY OS=Streptococcus pyogenes serotype M49 (strain NZ131) OX=471876 GN=secY	6
A0A0H3BYL1	Pyruvate kinase OS=Streptococcus pyogenes serotype M49 (strain NZ131) OX=471876 GN=pyk	6
A0A0H3BYM9	Glyceraldehyde-3-phosphate dehydrogenase OS=Streptococcus pyogenes serotype M49 (strain NZ131) OX=471876 GN=plr	6
A0A0H3BZ18	Cell-division initiation protein OS=Streptococcus pyogenes serotype M49 (strain NZ131) OX=471876 GN=divIVA	6
A0A0H3BZ61	F420_ligase domain-containing protein OS=Streptococcus pyogenes serotype M49 (strain NZ131) OX=471876 GN=Spy49_0453	6
B5XI23	Protein translocase subunit SecA OS=Streptococcus pyogenes serotype M49 (strain NZ131) OX=471876 GN=secA	6
B5XIG1	Trigger factor OS=Streptococcus pyogenes serotype M49 (strain NZ131) OX=471876 GN=tig	6
B5XJ35	30S ribosomal protein S10 OS=Streptococcus pyogenes serotype M49 (strain NZ131) OX=471876 GN=rpsJ	6
B5XJ39	50S ribosomal protein L2 OS=Streptococcus pyogenes serotype M49 (strain NZ131) OX=471876 GN=rplB	6
B5XJR0	30S ribosomal protein S7 OS=Streptococcus pyogenes serotype M49 (strain NZ131) OX=471876 GN=rpsG	6
B5XMC3	Arginine deiminase OS=Streptococcus pyogenes serotype M49 (strain NZ131) OX=471876 GN=arcA	6
B5XMJ7	Cell cycle protein GpsB OS=Streptococcus pyogenes serotype M49 (strain NZ131) OX=471876 GN=gpsB	6
A0A0H3BXH0	Endolytic murein transglycosylase OS=Streptococcus pyogenes serotype M49 (strain NZ131) OX=471876 GN=mltG	5
A0A0H3BY05	Carbamate kinase OS=Streptococcus pyogenes serotype M49 (strain NZ131) OX=471876 GN=arcC	5
A0A0H3BYW3	Uncharacterized protein OS=Streptococcus pyogenes serotype M49 (strain NZ131) OX=471876 GN=Spy49_0908	5
A0A0H3BZ76	Putative phosphoprotein phosphatase (PppL protein) OS=Streptococcus pyogenes serotype M49 (strain NZ131) OX=471876 GN=pppL	5
A0A0H3C124	Putative mannose-specific phosphotransferase system component IID OS=Streptococcus pyogenes serotype M49 (strain NZ131) OX=471876 GN=manN	5
A0A0H3C1B5	Cell division protein SepF OS=Streptococcus pyogenes serotype M49 (strain NZ131) OX=471876 GN=sepF	5
A0A0H3C1H3	Fructose-bisphosphate aldolase class II OS=Streptococcus pyogenes serotype M49 (strain NZ131) OX=471876 GN=fba	5
A0A0H3C281	50S ribosomal protein L13 OS=Streptococcus pyogenes serotype M49 (strain NZ131) OX=471876 GN=rplM	5
B5XHV3	Translation initiation factor IF-2 OS=Streptococcus pyogenes serotype M49 (strain NZ131) OX=471876 GN=infB	5
B5XIY6	Elongation factor Ts OS=Streptococcus pyogenes serotype M49 (strain NZ131) OX=471876 GN=tsf	5
B5XJ51	50S ribosomal protein L6 OS=Streptococcus pyogenes serotype M49 (strain NZ131) OX=471876 GN=rplF	5
B5XJD9	Acetate kinase OS=Streptococcus pyogenes serotype M49 (strain NZ131) OX=471876 GN=ackA	5
B5XL08	Phosphopentomutase OS=Streptococcus pyogenes serotype M49 (strain NZ131) OX=471876 GN=deoB	5
B5XLE2	50S ribosomal protein L10 OS=Streptococcus pyogenes serotype M49 (strain NZ131) OX=471876 GN=rplJ	5
B5XLJ8	L-lactate dehydrogenase OS=Streptococcus pyogenes serotype M49 (strain NZ131) OX=471876 GN=ldh	5
A0A0H3BVE1	30S ribosomal protein S5 OS=Streptococcus pyogenes serotype M49 (strain NZ131) OX=471876 GN=rpsE	4
A0A0H3BX54	Xaa-His dipeptidase OS=Streptococcus pyogenes serotype M49 (strain NZ131) OX=471876 GN=Spy49_0844	4
A0A0H3BXY9	Isoleucine--tRNA ligase OS=Streptococcus pyogenes serotype M49 (strain NZ131) OX=471876 GN=ileS	4
A0A0H3BYA0	PTS system, IIB component, putative OS=Streptococcus pyogenes serotype M49 (strain NZ131) OX=471876 GN=Spy49_1328c	4
A0A0H3BZB4	Phosphoenolpyruvate-protein phosphotransferase OS=Streptococcus pyogenes serotype M49 (strain NZ131) OX=471876 GN=ptsI	4
A0A0H3BZI9	UDP-glucose 6-dehydrogenase OS=Streptococcus pyogenes serotype M49 (strain NZ131) OX=471876 GN=Spy49_0459	4
A0A0H3C1H6	Cysteine synthase OS=Streptococcus pyogenes serotype M49 (strain NZ131) OX=471876 GN=cysM	4
A0A0H3C1S1	Chaperone protein DnaJ OS=Streptococcus pyogenes serotype M49 (strain NZ131) OX=471876 GN=dnaJ	4
A0A0H3C276	Galactose-6-phosphate isomerase subunit LacA OS=Streptococcus pyogenes serotype M49 (strain NZ131) OX=471876 GN=lacA2	4
A0A0H3C2K4	Alkyl hydroperoxide reductase C OS=Streptococcus pyogenes serotype M49 (strain NZ131) OX=471876 GN=ahpC	4
B5XJ48	50S ribosomal protein L5 OS=Streptococcus pyogenes serotype M49 (strain NZ131) OX=471876 GN=rplE	4
B5XJ63	50S ribosomal protein L17 OS=Streptococcus pyogenes serotype M49 (strain NZ131) OX=471876 GN=rplQ	4
B5XKM2	50S ribosomal protein L19 OS=Streptococcus pyogenes serotype M49 (strain NZ131) OX=471876 GN=rplS	4
B5XKP7	ATP synthase subunit b OS=Streptococcus pyogenes serotype M49 (strain NZ131) OX=471876 GN=atpF	4
B5XLR6	30S ribosomal protein S20 OS=Streptococcus pyogenes serotype M49 (strain NZ131) OX=471876 GN=rpsT	4
A0A0H3BVD7	Aldehyde-alcohol dehydrogenase OS=Streptococcus pyogenes serotype M49 (strain NZ131) OX=471876 GN=adhE	3
A0A0H3BXD5	30S ribosomal protein S12 OS=Streptococcus pyogenes serotype M49 (strain NZ131) OX=471876 GN=rpsL	3
A0A0H3BXF8	Putative sugar ABC transporter OS=Streptococcus pyogenes serotype M49 (strain NZ131) OX=471876 GN=Spy49_0973c	3
A0A0H3BXP9	Putative rhamnosyltransferase OS=Streptococcus pyogenes serotype M49 (strain NZ131) OX=471876 GN=rgpAc	3
A0A0H3BXS5	Protein-export membrane protein SecG OS=Streptococcus pyogenes serotype M49 (strain NZ131) OX=471876 GN=Spy49_0421	3
A0A0H3BYE4	Signal recognition particle protein OS=Streptococcus pyogenes serotype M49 (strain NZ131) OX=471876 GN=ffh	3
A0A0H3BYN6	Ribose-phosphate pyrophosphokinase OS=Streptococcus pyogenes serotype M49 (strain NZ131) OX=471876 GN=prsA	3
A0A0H3BYQ3	30S ribosomal protein S3 OS=Streptococcus pyogenes serotype M49 (strain NZ131) OX=471876 GN=rpsC	3
A0A0H3BYQ9	PTS system, IIB component OS=Streptococcus pyogenes serotype M49 (strain NZ131) OX=471876 GN=Spy49_0834	3
A0A0H3BYR4	Putative cytoplasmic membrane protein OS=Streptococcus pyogenes serotype M49 (strain NZ131) OX=471876 GN=lemA	3
A0A0H3BYS4	Dihydropteroate synthase OS=Streptococcus pyogenes serotype M49 (strain NZ131) OX=471876 GN=folP	3
A0A0H3BZA2	Uncharacterized protein OS=Streptococcus pyogenes serotype M49 (strain NZ131) OX=471876 GN=Spy49_0497	3
A0A0H3BZC1	Uncharacterized protein OS=Streptococcus pyogenes serotype M49 (strain NZ131) OX=471876 GN=Spy49_0377	3
A0A0H3BZL3	Conserved hypothetical integral membrane protein OS=Streptococcus pyogenes serotype M49 (strain NZ131) OX=471876 GN=Spy49_1194c	3
A0A0H3BZV5	PTS system, lactose-specific IIA component (EIIA-Lac) (Lactose-permease IIA component) (Phosphotransferase enzyme II, A component) OS=Streptococcus pyogenes serotype M49 (strain NZ131) OX=471876 GN=lacF	3
A0A0H3BZW4	Streptolysin S export ATP-binding protein (SagG) OS=Streptococcus pyogenes serotype M49 (strain NZ131) OX=471876 GN=sagG	3
A0A0H3C1C5	Putative peroxide resistance protein OS=Streptococcus pyogenes serotype M49 (strain NZ131) OX=471876 GN=Spy49_1183c	3
A0A0H3C1S0	CsbD domain-containing protein OS=Streptococcus pyogenes serotype M49 (strain NZ131) OX=471876 GN=Spy49_1665c	3
B5XHX4	Serine--tRNA ligase OS=Streptococcus pyogenes serotype M49 (strain NZ131) OX=471876 GN=serS	3
B5XI32	Elongation factor P OS=Streptococcus pyogenes serotype M49 (strain NZ131) OX=471876 GN=efp	3
B5XJ52	50S ribosomal protein L18 OS=Streptococcus pyogenes serotype M49 (strain NZ131) OX=471876 GN=rplR	3
B5XJH8	Adenylosuccinate synthetase OS=Streptococcus pyogenes serotype M49 (strain NZ131) OX=471876 GN=purA	3
B5XJU2	Probable transcriptional regulatory protein Spy49_0265 OS=Streptococcus pyogenes serotype M49 (strain NZ131) OX=471876 GN=Spy49_0265	3
B5XJY9	Probable manganese-dependent inorganic pyrophosphatase OS=Streptococcus pyogenes serotype M49 (strain NZ131) OX=471876 GN=ppaC	3
B5XLV6	ATP-dependent 6-phosphofructokinase OS=Streptococcus pyogenes serotype M49 (strain NZ131) OX=471876 GN=pfkA	3
A0A0H3BVI6	Putative V-type Na+-ATPase subunit E OS=Streptococcus pyogenes serotype M49 (strain NZ131) OX=471876 GN=ntpE	2
A0A0H3BVR1	Amino acid ABC transporter, ATP-binding protein OS=Streptococcus pyogenes serotype M49 (strain NZ131) OX=471876 GN=Spy49_0236c	2
A0A0H3BVU9	Response regulator CsrR OS=Streptococcus pyogenes serotype M49 (strain NZ131) OX=471876 GN=csrR	2
A0A0H3BWD2	ATP-dependent zinc metalloprotease FtsH OS=Streptococcus pyogenes serotype M49 (strain NZ131) OX=471876 GN=ftsH	2
A0A0H3BWJ5	Transcription termination/antitermination protein NusG OS=Streptococcus pyogenes serotype M49 (strain NZ131) OX=471876 GN=nusG	2
A0A0H3BWQ8	Ribulose-phosphate 3-epimerase OS=Streptococcus pyogenes serotype M49 (strain NZ131) OX=471876 GN=rpe	2
A0A0H3BX27	Dihydrolipoyl dehydrogenase OS=Streptococcus pyogenes serotype M49 (strain NZ131) OX=471876 GN=acoL	2
A0A0H3BX58	Uncharacterized protein OS=Streptococcus pyogenes serotype M49 (strain NZ131) OX=471876 GN=Spy49_0129	2
A0A0H3BX75	Catabolite control protein A OS=Streptococcus pyogenes serotype M49 (strain NZ131) OX=471876 GN=ccpA	2
A0A0H3BXV2	Glyco_trans_2-like domain-containing protein OS=Streptococcus pyogenes serotype M49 (strain NZ131) OX=471876 GN=Spy49_0457	2
A0A0H3BY81	Putative L-malate permease OS=Streptococcus pyogenes serotype M49 (strain NZ131) OX=471876 GN=malP	2
A0A0H3BY83	Transketolase OS=Streptococcus pyogenes serotype M49 (strain NZ131) OX=471876 GN=tkt	2
A0A0H3BY96	Phosphate acetyltransferase OS=Streptococcus pyogenes serotype M49 (strain NZ131) OX=471876 GN=pta	2
A0A0H3BYB7	LSU ribosomal protein L23p (L23Ae) OS=Streptococcus pyogenes serotype M49 (strain NZ131) OX=471876 GN=rplW	2
A0A0H3BYB9	Tagatose-6-phosphate kinase OS=Streptococcus pyogenes serotype M49 (strain NZ131) OX=471876 GN=fruK	2
A0A0H3BYE2	Putative glutamyl-aminopeptidase OS=Streptococcus pyogenes serotype M49 (strain NZ131) OX=471876 GN=pepA	2
A0A0H3BYF0	Putative ATP-dependent Clp proteinase OS=Streptococcus pyogenes serotype M49 (strain NZ131) OX=471876 GN=clpL	2
A0A0H3BYP3	Oligopeptide transport system permease protein oppC OS=Streptococcus pyogenes serotype M49 (strain NZ131) OX=471876 GN=oppC	2
A0A0H3BYT6	Non-phosphorylating glyceraldehyde-3-phosphate dehydrogenase (NADP) OS=Streptococcus pyogenes serotype M49 (strain NZ131) OX=471876 GN=gapN	2
A0A0H3BZ11	Phosphoglucomutase OS=Streptococcus pyogenes serotype M49 (strain NZ131) OX=471876 GN=pgmA	2
A0A0H3BZ40	Oligopeptide transport ATP-binding protein oppD OS=Streptococcus pyogenes serotype M49 (strain NZ131) OX=471876 GN=oppD	2
A0A0H3BZH8	ABC transporter ATP-binding protein OS=Streptococcus pyogenes serotype M49 (strain NZ131) OX=471876 GN=Spy49_1815	2
A0A0H3BZI7	Putative ATP-dependent protease OS=Streptococcus pyogenes serotype M49 (strain NZ131) OX=471876 GN=clpE	2
A0A0H3BZI8	Putative glycosyl transferase OS=Streptococcus pyogenes serotype M49 (strain NZ131) OX=471876 GN=Spy49_0620	2
A0A0H3BZK2	50S ribosomal protein L27 OS=Streptococcus pyogenes serotype M49 (strain NZ131) OX=471876 GN=rpmA	2
A0A0H3BZL6	Beta-glucoside permease IIABC component OS=Streptococcus pyogenes serotype M49 (strain NZ131) OX=471876 GN=Spy49_0485	2
A0A0H3BZN1	Uncharacterized protein OS=Streptococcus pyogenes serotype M49 (strain NZ131) OX=471876 GN=Spy49_1218c	2
A0A0H3BZS4	dTDP-4-dehydrorhamnose 3,5-epimerase OS=Streptococcus pyogenes serotype M49 (strain NZ131) OX=471876 GN=rmlC	2
A0A0H3BZS5	Putative amino acid ABC transproter OS=Streptococcus pyogenes serotype M49 (strain NZ131) OX=471876 GN=Spy49_1287c	2
A0A0H3BZX9	PTS system, mannose-specific IIC component OS=Streptococcus pyogenes serotype M49 (strain NZ131) OX=471876 GN=manM	2
A0A0H3C002	Uncharacterized protein OS=Streptococcus pyogenes serotype M49 (strain NZ131) OX=471876 GN=Spy49_1390c	2
A0A0H3C052	NADH oxidase OS=Streptococcus pyogenes serotype M49 (strain NZ131) OX=471876 GN=nox1	2
A0A0H3C0D5	Dihydrolipoamide acetyltransferase component of pyruvate dehydrogenase complex OS=Streptococcus pyogenes serotype M49 (strain NZ131) OX=471876 GN=acoC	2
A0A0H3C0F2	Tagatose 1,6-diphosphate aldolase OS=Streptococcus pyogenes serotype M49 (strain NZ131) OX=471876 GN=lacD2	2
A0A0H3C0G3	Uncharacterized protein OS=Streptococcus pyogenes serotype M49 (strain NZ131) OX=471876 GN=Spy49_1599c	2
A0A0H3C0J7	Phosphocarrier protein HPr OS=Streptococcus pyogenes serotype M49 (strain NZ131) OX=471876 GN=ptsH	2
A0A0H3C0S1	Putative sugar ABC transporter OS=Streptococcus pyogenes serotype M49 (strain NZ131) OX=471876 GN=Spy49_0972c	2
A0A0H3C0V3	Glutamine--fructose-6-phosphate aminotransferase [isomerizing] OS=Streptococcus pyogenes serotype M49 (strain NZ131) OX=471876 GN=glmS	2
A0A0H3C1K3	Thioredoxin reductase OS=Streptococcus pyogenes serotype M49 (strain NZ131) OX=471876 GN=nox2	2
A0A0H3C1P7	Transcription termination/antitermination protein NusA OS=Streptococcus pyogenes serotype M49 (strain NZ131) OX=471876 GN=nusA	2
B5XI03	GTP-sensing transcriptional pleiotropic repressor CodY OS=Streptococcus pyogenes serotype M49 (strain NZ131) OX=471876 GN=codY	2
B5XI40	30S ribosomal protein S6 OS=Streptococcus pyogenes serotype M49 (strain NZ131) OX=471876 GN=rpsF	2
B5XIJ1	30S ribosomal protein S9 OS=Streptococcus pyogenes serotype M49 (strain NZ131) OX=471876 GN=rpsI	2
B5XIK9	30S ribosomal protein S15 OS=Streptococcus pyogenes serotype M49 (strain NZ131) OX=471876 GN=rpsO	2
B5XIW8	Co-chaperonin GroES OS=Streptococcus pyogenes serotype M49 (strain NZ131) OX=471876 GN=groES	2
B5XIY5	30S ribosomal protein S2 OS=Streptococcus pyogenes serotype M49 (strain NZ131) OX=471876 GN=rpsB	2
B5XJ02	UPF0297 protein Spy49_1751c OS=Streptococcus pyogenes serotype M49 (strain NZ131) OX=471876 GN=Spy49_1751c	2
B5XJ13	Phosphate acyltransferase OS=Streptococcus pyogenes serotype M49 (strain NZ131) OX=471876 GN=plsX	2
B5XJ36	50S ribosomal protein L3 OS=Streptococcus pyogenes serotype M49 (strain NZ131) OX=471876 GN=rplC	2
B5XJ47	50S ribosomal protein L24 OS=Streptococcus pyogenes serotype M49 (strain NZ131) OX=471876 GN=rplX	2
B5XJ55	50S ribosomal protein L15 OS=Streptococcus pyogenes serotype M49 (strain NZ131) OX=471876 GN=rplO	2
B5XJ57	Adenylate kinase OS=Streptococcus pyogenes serotype M49 (strain NZ131) OX=471876 GN=adk	2
B5XJ60	30S ribosomal protein S13 OS=Streptococcus pyogenes serotype M49 (strain NZ131) OX=471876 GN=rpsM	2
B5XJ61	30S ribosomal protein S11 OS=Streptococcus pyogenes serotype M49 (strain NZ131) OX=471876 GN=rpsK	2
B5XJ72	DNA-directed RNA polymerase subunit beta OS=Streptococcus pyogenes serotype M49 (strain NZ131) OX=471876 GN=rpoB	2
B5XJ77	Arginine--tRNA ligase OS=Streptococcus pyogenes serotype M49 (strain NZ131) OX=471876 GN=argS	2
B5XJA2	50S ribosomal protein L9 OS=Streptococcus pyogenes serotype M49 (strain NZ131) OX=471876 GN=rplI	2
B5XJM0	Glucose-6-phosphate isomerase OS=Streptococcus pyogenes serotype M49 (strain NZ131) OX=471876 GN=pgi	2
B5XK61	50S ribosomal protein L11 OS=Streptococcus pyogenes serotype M49 (strain NZ131) OX=471876 GN=rplK	2
B5XK62	50S ribosomal protein L1 OS=Streptococcus pyogenes serotype M49 (strain NZ131) OX=471876 GN=rplA	2
B5XKA6	Threonine--tRNA ligase OS=Streptococcus pyogenes serotype M49 (strain NZ131) OX=471876 GN=thrS	2
B5XKG9	Lysine--tRNA ligase OS=Streptococcus pyogenes serotype M49 (strain NZ131) OX=471876 GN=lysS	2
B5XKL7	50S ribosomal protein L31 type B OS=Streptococcus pyogenes serotype M49 (strain NZ131) OX=471876 GN=rpmE2	2
B5XKV2	50S ribosomal protein L21 OS=Streptococcus pyogenes serotype M49 (strain NZ131) OX=471876 GN=rplU	2
B5XKW7	30S ribosomal protein S16 OS=Streptococcus pyogenes serotype M49 (strain NZ131) OX=471876 GN=rpsP	2
B5XLC6	Elongation factor 4 OS=Streptococcus pyogenes serotype M49 (strain NZ131) OX=471876 GN=lepA	2
B5XLI8	Peptide chain release factor 1 OS=Streptococcus pyogenes serotype M49 (strain NZ131) OX=471876 GN=prfA	2
B5XM69	2,3-bisphosphoglycerate-dependent phosphoglycerate mutase OS=Streptococcus pyogenes serotype M49 (strain NZ131) OX=471876 GN=gpmA	2
A0A0H3BVL7	ParB domain-containing protein OS=Streptococcus pyogenes serotype M49 (strain NZ131) OX=471876 GN=Spy49_0168	1
A0A0H3BVS5	Oligopeptide transport ATP-binding protein oppF OS=Streptococcus pyogenes serotype M49 (strain NZ131) OX=471876 GN=oppF	1
A0A0H3BWD6	Phosphoribosylaminoimidazole-succinocarboxamide synthase OS=Streptococcus pyogenes serotype M49 (strain NZ131) OX=471876 GN=purC	1
A0A0H3BWE7	Alcohol dehydrogenase OS=Streptococcus pyogenes serotype M49 (strain NZ131) OX=471876 GN=adhP	1
A0A0H3BWG0	DNA-directed RNA polymerase subunit beta' OS=Streptococcus pyogenes serotype M49 (strain NZ131) OX=471876 GN=rpoC	1
A0A0H3BWK0	PTS system, IIB component OS=Streptococcus pyogenes serotype M49 (strain NZ131) OX=471876 GN=Spy49_0154	1
A0A0H3BWV1	Signal transduction histidine-protein kinase ArlS OS=Streptococcus pyogenes serotype M49 (strain NZ131) OX=471876 GN=csrS	1
A0A0H3BWX7	Beta sliding clamp OS=Streptococcus pyogenes serotype M49 (strain NZ131) OX=471876 GN=dnaN	1
A0A0H3BX71	Uncharacterized protein OS=Streptococcus pyogenes serotype M49 (strain NZ131) OX=471876 GN=Spy49_0427c	1
A0A0H3BX93	Shikimate 5-dehydrogenase OS=Streptococcus pyogenes serotype M49 (strain NZ131) OX=471876 GN=aroE.2	1
A0A0H3BXB3	Uncharacterized protein OS=Streptococcus pyogenes serotype M49 (strain NZ131) OX=471876 GN=Spy49_0911c	1
A0A0H3BXF9	Putative ABC transporter OS=Streptococcus pyogenes serotype M49 (strain NZ131) OX=471876 GN=atmD	1
A0A0H3BXI3	Putative peptidoglycan branched peptide synthesis protein, serine/alanine adding enzyme OS=Streptococcus pyogenes serotype M49 (strain NZ131) OX=471876 GN=murM.1	1
A0A0H3BXQ2	DNA translocase FtsK OS=Streptococcus pyogenes serotype M49 (strain NZ131) OX=471876 GN=ftsK	1
A0A0H3BXR4	Ribonucleoside-diphosphate reductase OS=Streptococcus pyogenes serotype M49 (strain NZ131) OX=471876 GN=nrdE1	1
A0A0H3BXT4	Putative sugar transferase OS=Streptococcus pyogenes serotype M49 (strain NZ131) OX=471876 GN=Spy49_0433	1
A0A0H3BXU4	Putative ABC transporter OS=Streptococcus pyogenes serotype M49 (strain NZ131) OX=471876 GN=Spy49_0683	1
A0A0H3BXU8	AP_endonuc_2 domain-containing protein OS=Streptococcus pyogenes serotype M49 (strain NZ131) OX=471876 GN=Spy49_0451	1
A0A0H3BXW6	Branched-chain-amino-acid aminotransferase OS=Streptococcus pyogenes serotype M49 (strain NZ131) OX=471876 GN=bcaT	1
A0A0H3BXX4	Single-stranded-DNA-specific exonuclease RecJ OS=Streptococcus pyogenes serotype M49 (strain NZ131) OX=471876 GN=recJ	1
A0A0H3BXY2	Uncharacterized protein OS=Streptococcus pyogenes serotype M49 (strain NZ131) OX=471876 GN=Spy49_0496	1
A0A0H3BXZ7	50S ribosomal subunit assembly factor BipA OS=Streptococcus pyogenes serotype M49 (strain NZ131) OX=471876 GN=bipA	1
A0A0H3BY45	Ribosome hibernation promoting factor OS=Streptococcus pyogenes serotype M49 (strain NZ131) OX=471876 GN=hpf	1
A0A0H3BY61	Ribonuclease Y OS=Streptococcus pyogenes serotype M49 (strain NZ131) OX=471876 GN=rny	1
A0A0H3BY85	Rhamnosyltransferase OS=Streptococcus pyogenes serotype M49 (strain NZ131) OX=471876 GN=rgpBc	1
A0A0H3BY90	Putative ribose-phosphate pyrophosphokinase OS=Streptococcus pyogenes serotype M49 (strain NZ131) OX=471876 GN=prs	1
A0A0H3BY92	Uncharacterized protein OS=Streptococcus pyogenes serotype M49 (strain NZ131) OX=471876 GN=Spy49_1318c	1
A0A0H3BY93	Putative pore-forming peptide OS=Streptococcus pyogenes serotype M49 (strain NZ131) OX=471876 GN=Spy49_0625	1
A0A0H3BYC1	DNA-directed RNA polymerase subunit alpha OS=Streptococcus pyogenes serotype M49 (strain NZ131) OX=471876 GN=rpoA	1
A0A0H3BYG0	Putative transcriptional regulator OS=Streptococcus pyogenes serotype M49 (strain NZ131) OX=471876 GN=cpsY	1
A0A0H3BYG7	Putative toxic anion resistance protein OS=Streptococcus pyogenes serotype M49 (strain NZ131) OX=471876 GN=Spy49_0138c	1
A0A0H3BYG9	Aminopeptidase OS=Streptococcus pyogenes serotype M49 (strain NZ131) OX=471876 GN=pepN	1
A0A0H3BYI5	Glucose-1-phosphate thymidylyltransferase OS=Streptococcus pyogenes serotype M49 (strain NZ131) OX=471876 GN=rmlA	1
A0A0H3BYJ6	CsbD domain-containing protein OS=Streptococcus pyogenes serotype M49 (strain NZ131) OX=471876 GN=Spy49_1002c	1
A0A0H3BYM8	Putative ABC transporter OS=Streptococcus pyogenes serotype M49 (strain NZ131) OX=471876 GN=Spy49_0800	1
A0A0H3BYN8	Lipoate--protein ligase OS=Streptococcus pyogenes serotype M49 (strain NZ131) OX=471876 GN=Spy49_0812	1
A0A0H3BYN9	Putative esterase OS=Streptococcus pyogenes serotype M49 (strain NZ131) OX=471876 GN=Spy49_1033c	1
A0A0H3BYP4	Phosphoglucosamine mutase OS=Streptococcus pyogenes serotype M49 (strain NZ131) OX=471876 GN=glmM	1
A0A0H3BYR8	Ribosomal_L12_N domain-containing protein OS=Streptococcus pyogenes serotype M49 (strain NZ131) OX=471876 GN=Spy49_0847	1
A0A0H3BYS1	Putative PBP 5 synthesis repressor OS=Streptococcus pyogenes serotype M49 (strain NZ131) OX=471876 GN=psr	1
A0A0H3BYT5	NAD-dependent malic enzyme OS=Streptococcus pyogenes serotype M49 (strain NZ131) OX=471876 GN=Spy49_0864	1
A0A0H3BYY9	Superoxide dismutase OS=Streptococcus pyogenes serotype M49 (strain NZ131) OX=471876 GN=sodM	1
A0A0H3BZ00	Collagen-like surface protein OS=Streptococcus pyogenes serotype M49 (strain NZ131) OX=471876 GN=sclA	1
A0A0H3BZ29	Iron-sulfur cluster assembly ATPase protein SufC OS=Streptococcus pyogenes serotype M49 (strain NZ131) OX=471876 GN=Spy49_0242	1
A0A0H3BZ33	Xaa-His dipeptidase OS=Streptococcus pyogenes serotype M49 (strain NZ131) OX=471876 GN=Spy49_1193c	1
A0A0H3BZ39	Fc-gamma receptor OS=Streptococcus pyogenes serotype M49 (strain NZ131) OX=471876 GN=Spy49_1672c	1
A0A0H3BZ60	Histidine kinase OS=Streptococcus pyogenes serotype M49 (strain NZ131) OX=471876 GN=Spy49_1240c	1
A0A0H3BZ68	Membrane protein insertase YidC OS=Streptococcus pyogenes serotype M49 (strain NZ131) OX=471876 GN=oxaA	1
A0A0H3BZ85	Putative endopeptidase Clp ATP-binding chain C OS=Streptococcus pyogenes serotype M49 (strain NZ131) OX=471876 GN=clpC	1
A0A0H3BZ90	Alkyl hydroperoxide reductase protein F OS=Streptococcus pyogenes serotype M49 (strain NZ131) OX=471876 GN=nox3	1
A0A0H3BZ95	UPF0371 protein Spy49_1067 OS=Streptococcus pyogenes serotype M49 (strain NZ131) OX=471876 GN=Spy49_1067	1
A0A0H3BZC9	Uridylate kinase OS=Streptococcus pyogenes serotype M49 (strain NZ131) OX=471876 GN=pyrH	1
A0A0H3BZD9	Protein GrpE OS=Streptococcus pyogenes serotype M49 (strain NZ131) OX=471876 GN=grpE	1
A0A0H3BZE8	Universal stress protein OS=Streptococcus pyogenes serotype M49 (strain NZ131) OX=471876 GN=Spy49_1389	1
A0A0H3BZF7	Putative NAD(P)H-flavin oxidoreductase OS=Streptococcus pyogenes serotype M49 (strain NZ131) OX=471876 GN=Spy49_0430c	1
A0A0H3BZI2	Uncharacterized protein OS=Streptococcus pyogenes serotype M49 (strain NZ131) OX=471876 GN=Spy49_0454	1
A0A0H3BZJ8	Cell division protein FtsA OS=Streptococcus pyogenes serotype M49 (strain NZ131) OX=471876 GN=ftsA	1
A0A0H3BZK3	Glucokinase OS=Streptococcus pyogenes serotype M49 (strain NZ131) OX=471876 GN=Spy49_1181c	1
A0A0H3BZP2	Arsenate reductase OS=Streptococcus pyogenes serotype M49 (strain NZ131) OX=471876 GN=arsC	1
A0A0H3BZT0	Uncharacterized protein OS=Streptococcus pyogenes serotype M49 (strain NZ131) OX=471876 GN=Spy49_1297c	1
A0A0H3BZT5	Peptide chain release factor 2 OS=Streptococcus pyogenes serotype M49 (strain NZ131) OX=471876 GN=prfB	1
A0A0H3BZY3	3-oxoacyl-[acyl-carrier-protein] synthase 2 OS=Streptococcus pyogenes serotype M49 (strain NZ131) OX=471876 GN=fabF	1
A0A0H3BZZ0	CRISPR-associated endonuclease Cas9 OS=Streptococcus pyogenes serotype M49 (strain NZ131) OX=471876 GN=cas9	1
A0A0H3BZZ3	Teichoic acid export ATP-binding protein tagH OS=Streptococcus pyogenes serotype M49 (strain NZ131) OX=471876 GN=rgpDc	1
A0A0H3C000	Putative phosphotransferase system (PTS), enzyme II component C OS=Streptococcus pyogenes serotype M49 (strain NZ131) OX=471876 GN=Spy49_0835	1
A0A0H3C004	Uncharacterized protein OS=Streptococcus pyogenes serotype M49 (strain NZ131) OX=471876 GN=Spy49_0627	1
A0A0H3C005	Succinate-semialdehyde dehydrogenase NADP OS=Streptococcus pyogenes serotype M49 (strain NZ131) OX=471876 GN=Spy49_0841	1
A0A0H3C022	Dipeptide transport ATP-binding protein dppD OS=Streptococcus pyogenes serotype M49 (strain NZ131) OX=471876 GN=dppD	1
A0A0H3C049	Spi SpeB protease inhibitor OS=Streptococcus pyogenes serotype M49 (strain NZ131) OX=471876 GN=Spy49_1689c	1
A0A0H3C0A4	Phosphate transport ATP-binding protein pstB OS=Streptococcus pyogenes serotype M49 (strain NZ131) OX=471876 GN=pstB	1
A0A0H3C0B4	Uncharacterized protein OS=Streptococcus pyogenes serotype M49 (strain NZ131) OX=471876 GN=Spy49_0994c	1
A0A0H3C0C0	30S ribosomal protein S14 OS=Streptococcus pyogenes serotype M49 (strain NZ131) OX=471876 GN=rpsN2	1
A0A0H3C0C8	Putative alkaline-shock protein OS=Streptococcus pyogenes serotype M49 (strain NZ131) OX=471876 GN=asp	1
A0A0H3C0F1	Teichoic acid D-alanyltransferase OS=Streptococcus pyogenes serotype M49 (strain NZ131) OX=471876 GN=dltB	1
A0A0H3C0H8	2-amino-4-hydroxy-6-hydroxymethyldihydropteridine diphosphokinase OS=Streptococcus pyogenes serotype M49 (strain NZ131) OX=471876 GN=folK	1
A0A0H3C0R9	Phosphopantothenoylcysteine synthetase OS=Streptococcus pyogenes serotype M49 (strain NZ131) OX=471876 GN=dpfB	1
A0A0H3C0V7	Putative ABC transporter OS=Streptococcus pyogenes serotype M49 (strain NZ131) OX=471876 GN=Spy49_1021	1
A0A0H3C0Z0	Putative ABC transporter OS=Streptococcus pyogenes serotype M49 (strain NZ131) OX=471876 GN=Spy49_1298c	1
A0A0H3C0Z3	Uncharacterized protein OS=Streptococcus pyogenes serotype M49 (strain NZ131) OX=471876 GN=Spy49_1787c	1
A0A0H3C120	Uncharacterized protein OS=Streptococcus pyogenes serotype M49 (strain NZ131) OX=471876 GN=Spy49_1351c	1
A0A0H3C129	3-oxoacyl-[acyl-carrier-protein] reductase OS=Streptococcus pyogenes serotype M49 (strain NZ131) OX=471876 GN=fabG	1
A0A0H3C178	Putative putative C3-degrading proteinase OS=Streptococcus pyogenes serotype M49 (strain NZ131) OX=471876 GN=cppA	1
A0A0H3C190	Transcriptional regulator, biotin repressor family OS=Streptococcus pyogenes serotype M49 (strain NZ131) OX=471876 GN=Spy49_1142c	1
A0A0H3C1A0	Arginine repressor OS=Streptococcus pyogenes serotype M49 (strain NZ131) OX=471876 GN=argR	1
A0A0H3C1B0	Uncharacterized protein OS=Streptococcus pyogenes serotype M49 (strain NZ131) OX=471876 GN=Spy49_1166	1
A0A0H3C1E7	Valine--tRNA ligase OS=Streptococcus pyogenes serotype M49 (strain NZ131) OX=471876 GN=valS	1
A0A0H3C1M5	Putative Sodium-dependent phosphate transporter OS=Streptococcus pyogenes serotype M49 (strain NZ131) OX=471876 GN=Spy49_1316c	1
A0A0H3C1Q9	ATPase, AAA family OS=Streptococcus pyogenes serotype M49 (strain NZ131) OX=471876 GN=Spy49_1655	1
A0A0H3C1W1	Multimodular transpeptidase-transglycosylase OS=Streptococcus pyogenes serotype M49 (strain NZ131) OX=471876 GN=pbp2A	1
A0A0H3C1X8	Putative endopeptidase O OS=Streptococcus pyogenes serotype M49 (strain NZ131) OX=471876 GN=pepO	1
A0A0H3C219	Uncharacterized protein OS=Streptococcus pyogenes serotype M49 (strain NZ131) OX=471876 GN=Spy49_1782	1
A0A0H3C228	L-serine dehydratase OS=Streptococcus pyogenes serotype M49 (strain NZ131) OX=471876 GN=sdhA	1
A0A0H3C268	6-phospho-beta-galactosidase OS=Streptococcus pyogenes serotype M49 (strain NZ131) OX=471876 GN=lacG	1
A0A0H3C2P8	Uncharacterized protein OS=Streptococcus pyogenes serotype M49 (strain NZ131) OX=471876 GN=Spy49_1748c	1
B5XHZ8	Aspartyl/glutamyl-tRNA(Asn/Gln) amidotransferase subunit B OS=Streptococcus pyogenes serotype M49 (strain NZ131) OX=471876 GN=gatB	1
B5XI61	Xaa-Pro dipeptidyl-peptidase OS=Streptococcus pyogenes serotype M49 (strain NZ131) OX=471876 GN=pepX	1
B5XID8	Deoxyribose-phosphate aldolase OS=Streptococcus pyogenes serotype M49 (strain NZ131) OX=471876 GN=deoC	1
B5XIX5	Imidazolonepropionase OS=Streptococcus pyogenes serotype M49 (strain NZ131) OX=471876 GN=hutI	1
B5XIY2	Histidine ammonia-lyase OS=Streptococcus pyogenes serotype M49 (strain NZ131) OX=471876 GN=hutH	1
B5XJ09	DNA mismatch repair protein MutL OS=Streptococcus pyogenes serotype M49 (strain NZ131) OX=471876 GN=mutL	1
B5XJ37	50S ribosomal protein L4 OS=Streptococcus pyogenes serotype M49 (strain NZ131) OX=471876 GN=rplD	1
B5XJ40	30S ribosomal protein S19 OS=Streptococcus pyogenes serotype M49 (strain NZ131) OX=471876 GN=rpsS	1
B5XJ44	50S ribosomal protein L29 OS=Streptococcus pyogenes serotype M49 (strain NZ131) OX=471876 GN=rpmC	1
B5XJ45	30S ribosomal protein S17 OS=Streptococcus pyogenes serotype M49 (strain NZ131) OX=471876 GN=rpsQ	1
B5XJ50	30S ribosomal protein S8 OS=Streptococcus pyogenes serotype M49 (strain NZ131) OX=471876 GN=rpsH	1
B5XJ70	Tyrosine--tRNA ligase OS=Streptococcus pyogenes serotype M49 (strain NZ131) OX=471876 GN=tyrS	1
B5XJM4	Glycerol-3-phosphate dehydrogenase [NAD(P)+] OS=Streptococcus pyogenes serotype M49 (strain NZ131) OX=471876 GN=gpsA	1
B5XJW0	GTPase Der OS=Streptococcus pyogenes serotype M49 (strain NZ131) OX=471876 GN=der	1
B5XJX2	UPF0154 protein Spy49_0296 OS=Streptococcus pyogenes serotype M49 (strain NZ131) OX=471876 GN=Spy49_0296	1
B5XJZ7	Uracil phosphoribosyltransferase OS=Streptococcus pyogenes serotype M49 (strain NZ131) OX=471876 GN=upp	1
B5XK03	Initiation-control protein YabA OS=Streptococcus pyogenes serotype M49 (strain NZ131) OX=471876 GN=Spy49_0329	1
B5XK49	Bifunctional protein GlmU OS=Streptococcus pyogenes serotype M49 (strain NZ131) OX=471876 GN=glmU	1
B5XKP9	ATP synthase subunit alpha OS=Streptococcus pyogenes serotype M49 (strain NZ131) OX=471876 GN=atpA	1
B5XKQ0	ATP synthase gamma chain OS=Streptococcus pyogenes serotype M49 (strain NZ131) OX=471876 GN=atpG	1
B5XKR6	30S ribosomal protein S21 OS=Streptococcus pyogenes serotype M49 (strain NZ131) OX=471876 GN=rpsU	1
B5XKT9	50S ribosomal protein L35 OS=Streptococcus pyogenes serotype M49 (strain NZ131) OX=471876 GN=rpmI	1
B5XKU0	50S ribosomal protein L20 OS=Streptococcus pyogenes serotype M49 (strain NZ131) OX=471876 GN=rplT	1
B5XKU5	UPF0342 protein Spy49_0636 OS=Streptococcus pyogenes serotype M49 (strain NZ131) OX=471876 GN=Spy49_0636	1
B5XLE8	GTP cyclohydrolase 1 OS=Streptococcus pyogenes serotype M49 (strain NZ131) OX=471876 GN=folE	1
B5XLI1	GMP reductase OS=Streptococcus pyogenes serotype M49 (strain NZ131) OX=471876 GN=guaC	1
B5XLJ2	Serine hydroxymethyltransferase OS=Streptococcus pyogenes serotype M49 (strain NZ131) OX=471876 GN=glyA	1
B5XLN9	GMP synthase [glutamine-hydrolyzing] OS=Streptococcus pyogenes serotype M49 (strain NZ131) OX=471876 GN=guaA	1
B5XLX3	D-alanyl carrier protein OS=Streptococcus pyogenes serotype M49 (strain NZ131) OX=471876 GN=dltC	1
B5XLX5	D-alanine--D-alanyl carrier protein ligase OS=Streptococcus pyogenes serotype M49 (strain NZ131) OX=471876 GN=dltA	1
B5XM21	Uridine kinase OS=Streptococcus pyogenes serotype M49 (strain NZ131) OX=471876 GN=udk	1
B5XM60	Peptide chain release factor 3 OS=Streptococcus pyogenes serotype M49 (strain NZ131) OX=471876 GN=prfC	1
B5XM82	Exodeoxyribonuclease 7 small subunit OS=Streptococcus pyogenes serotype M49 (strain NZ131) OX=471876 GN=xseB	1
B5XM83	Exodeoxyribonuclease 7 large subunit OS=Streptococcus pyogenes serotype M49 (strain NZ131) OX=471876 GN=xseA	1
B5XMA2	UDP-N-acetylglucosamine--N-acetylmuramyl-(pentapeptide) pyrophosphoryl-undecaprenol N-acetylglucosamine transferase OS=Streptococcus pyogenes serotype M49 (strain NZ131) OX=471876 GN=murG	1
B5XMC1	Ornithine carbamoyltransferase OS=Streptococcus pyogenes serotype M49 (strain NZ131) OX=471876 GN=arcB	1
B5XMM9	Glycine--tRNA ligase beta subunit OS=Streptococcus pyogenes serotype M49 (strain NZ131) OX=471876 GN=glyS	1
P0C096	Protein RecA OS=Streptococcus pyogenes serotype M49 (strain NZ131) OX=471876 GN=recA	1
