# Supplementary material for: Dynamic Protein Phosphorylation in Streptococcus pyogenes during Growth, Stationary Phase, and Starvation
Source: Microorganisms. 2024 Mar 20;12(3):621. doi: 10.3390/microorganisms12030621 (PMC10975399; doi:10.3390/microorganisms12030621)
Supplement: Supplementary file 1 [file microorganisms-12-00621-s001.zip › Supplementary Table S5.xlsx]

## Sheet: Legend
Quantification of the occurrence of phosphorylation sites
For each phosphorylation site, the amounts of all associated phosphopeptide ions, i.e., species with different charge states, missed cleavages, and additional modifications, were summed.
Results are given without and with normalization to the abundance of the corresponding protein.
Column heading	Description
1st feature	Identifier from Progenesis data analysis of the most abundant phosphopeptide ion containing the phosphorylation site
No. of features	Number of phosphopeptide ions whose amounts were included in the quantification
UniProt Acc. No.	UniProtKB Accession of the protein containing the phosphorylation site
Protein name	Name of the protein containing the phosphorylation site
15 AS window	15 amino acid sequence window surrounding the phosphorylation site
Residue	Phosphorylated amino acid
Position	Position of phosphorylation site in the protein sequence
Identified by	Search strategy that enabled identification of the phosphosite: MA - Mascot, IA - Ion accounting, SL - spectral library search
Used for quantification	Yes = Phosphosite was included in quantitative analysis of dynamic protein phosphorylation

## Sheet: Exp 1
									Phosphorylation site abundance										Phosphorylation site abundance normalized to protein abundance
1st feature	No. of features	UniProt Acc. No.	Protein name	15 AS window	Residue	Position	Identified by	Used for quantification	THY 0.8	THY ME	THY exp	THY stat	CDMF ME	CDMF exp	CDMF stat	CDM- ME	CDM- exp	CDM- stat	THY 0.8	THY ME	THY exp	THY stat	CDMF ME	CDMF exp	CDMF stat	CDM- ME	CDM- exp	CDM- stat
2329	1	B5XJ02	UPF0297 protein Spy49_1751c OS=Streptococcus pyogenes serotype M49 (strain NZ131) OX=471876 GN=Spy49_1751c PE=3 SV=1	----MGFTDETVRFK; T4T7	T, T	4, 7	M L	yes	3658.94	4212.9	3929.32	787.721	1228.93	19.7965	66.5811	998.209	103.787	12216.8	166.2	125.1	167.9	36.5	59.3	1.3	4.1	38.7	3.2	391.3
5156	1	A0A0H3BZK2	50S ribosomal protein L27 OS=Streptococcus pyogenes serotype M49 (strain NZ131) OX=471876 GN=rpmA PE=3 SV=1	AADGQTVSGGSILYR	S	43	P L	yes	396.213	215.237	249.939	293.62	247.917	214	796.704	267.565	389.363	5792.33	9.8	5.9	7.7	10.9	6.6	4.7	17.1	6.6	12.4	357.8
1918	2	B5XJR0	30S ribosomal protein S7 OS=Streptococcus pyogenes serotype M49 (strain NZ131) OX=471876 GN=rpsG PE=3 SV=1	AANNTGASVKKREDT	S	134	M P L	yes	160.393	56.3586	50.8606	441.819	130.493	191.253	1125.14	91.5973	833.839	36324.7	2.2	0.8	0.8	7.4	1.9	2.5	15.6	1.3	12.2	565
336	2	A0A0H3BYA0	PTS system_ IIB component_ putative OS=Streptococcus pyogenes serotype M49 (strain NZ131) OX=471876 GN=Spy49_1328c PE=4 SV=1	ACGAGVNSSHQIKDA	S	14	M P L	yes	13202.8	3643.52	14518.8	29920	12425.6	8517	10363	12944.9	5938.86	4713.9	851.2	866.6	836	1028.9	750.9	890.5	971.4	875.5	1223.3	1019.2
4091	2	A0A0H3BZC7	EIIAB-Man OS=Streptococcus pyogenes serotype M49 (strain NZ131) OX=471876 GN=manL PE=4 SV=1	ADRIIVASDEVAQDD	S	201	P	yes	1588.95	419.498	1150.99	929.025	1513.66	1715.98	4215.86	1218.62	895.966	1890.81	33.5	11.7	27.4	26.6	33.5	23.5	53	27.2	23.9	53.5
203	2	A0A0H3BZ18	Cell-division initiation protein OS=Streptococcus pyogenes serotype M49 (strain NZ131) OX=471876 GN=divIVA PE=4 SV=1	AEATNLVSKATYDAQ	S	94	M P L	yes	6585	2409.52	6893.67	47064.5	8447.81	10591	13400.2	7037.33	13270.4	17317	281.3	109.2	301.6	2216.2	358.8	345	582.6	304.5	591.6	850.9
3066	2	A0A0H3BXF8	Putative sugar ABC transporter OS=Streptococcus pyogenes serotype M49 (strain NZ131) OX=471876 GN=Spy49_0973c PE=4 SV=1	AEMMVGRSVSFTTSK	S	241	M	yes	753.708	450.029	523.73	2610.24	662.995	662.155	1698.14	611.557	996.878	2559.29	97.3	80.3	76.3	297.7	85.7	83.3	205.3	82.9	173.9	413.3
3776	1	A0A0H3BZQ5	SSU ribosomal protein S1p OS=Streptococcus pyogenes serotype M49 (strain NZ131) OX=471876 GN=rpsA PE=4 SV=1	AEVFSKISEGAVVTG	S	192	P	yes	508.404	516.524	373.878	2382.25	485.75	749.778	3136.78	519.108	841.036	2729.19	8.8	9.5	7.5	52.5	8.7	11	44.2	8.9	16.1	54.4
8702	1	B5XKI2	Triosephosphate isomerase OS=Streptococcus pyogenes serotype M49 (strain NZ131) OX=471876 GN=tpiA PE=3 SV=1	AFVEAVASKLPSTDL	S	29	M	yes	116.042	115.738	112.444	457.086	139.471	131.825	909.435	181.398	290.59	945.417	1.5	1.1	1.3	6.6	1.8	1.6	10.2	1.9	2.5	7.9
3118	1	A0A0H3BYQ3	30S ribosomal protein S3 OS=Streptococcus pyogenes serotype M49 (strain NZ131) OX=471876 GN=rpsC PE=3 SV=1	AGAKGIKTQVSGRLN	T	141	M L	yes	168.033	795.676	114.474	196.643	178.312	197.992	500.725	215.058	1148.72	5380.02	2.2	11	1.8	3.1	2.5	2.4	6.3	2.8	15.8	74.4
6744	1	B5XJ35	30S ribosomal protein S10 OS=Streptococcus pyogenes serotype M49 (strain NZ131) OX=471876 GN=rpsJ PE=3 SV=1	AGPVPLPTERSLYTI	T	44	P	yes	6.96304	26.515	0	21.9467	0	0	287.736	0	39.279	4900.04	0.1	0.4	0	0.4	0	0	4	0	0.6	78.9
57	10	A0A0H3BYP4	Phosphoglucosamine mutase OS=Streptococcus pyogenes serotype M49 (strain NZ131) OX=471876 GN=glmM PE=3 SV=1	AGVMISASHNPALDN	S	100	M P L	yes	109109	20316.7	156929	290129	156336	175109	245538	161156	93098.3	125800	7139.8	1268.2	10142.9	20014.9	10769.8	10836.4	14232.5	10676.1	6063	7861.7
4625	1	A0A0H3C0C8	Putative alkaline-shock protein OS=Streptococcus pyogenes serotype M49 (strain NZ131) OX=471876 GN=asp PE=3 SV=1	AIKDNFQSLLRKENY	S	48	M	yes	250.88	242.651	304.469	1390.61	225.654	262.242	778.747	351.06	1153.25	2804.55	35.7	28.5	39	196.1	31.4	41.3	123.5	45.5	137.7	345.3
939	3	B5XKI1	Elongation factor Tu OS=Streptococcus pyogenes serotype M49 (strain NZ131) OX=471876 GN=tuf PE=3 SV=1	AKEKYDRSKPHVNIG	S	9	M P	yes	3675.7	4379.2	2386.56	14117	4815.94	3342.63	25682.3	5738.43	6728.39	27057.8	15.3	17.3	10	54	20.7	14	108.1	23.3	25.3	94.4
4175	2	A0A0H3C0B4	Uncharacterized protein OS=Streptococcus pyogenes serotype M49 (strain NZ131) OX=471876 GN=Spy49_0994c PE=4 SV=1	AKLDKLASQNALELA	S	107	M	yes	275.504	452.483	487.701	6244.34	584.389	526.302	2150.77	752.162	2331.24	9625.69	143.4	216.7	250.1	3863.3	326.3	228.4	848.1	440.2	1287	6066.8
929	2	B5XMJ7	Cell cycle protein GpsB OS=Streptococcus pyogenes serotype M49 (strain NZ131) OX=471876 GN=gpsB PE=3 SV=1	AKYQARNTVSATVQQ	T	66	M P L	yes	30072.3	12544.5	14996.7	5618.07	17809.2	4935.66	6680.82	12475.4	3737.57	7496.76	4668.3	1533	2368	1172.3	2840.2	777.1	1822.9	1907.3	533.3	1457.8
613	2	A0A0H3C124	Putative mannose-specific phosphotransferase system component IID OS=Streptococcus pyogenes serotype M49 (strain NZ131) OX=471876 GN=manN PE=4 SV=1	ALKKLYTSPEDRATA	S	50	M L	yes	2693.9	2037.47	2245.39	9763.54	2346.72	2128.2	11199	2385.22	4068.75	13145	95.4	93.8	80.9	342.9	85.3	48.8	252.8	86	165.3	508.4
1300	2	A0A0H3BXD5	30S ribosomal protein S12 OS=Streptococcus pyogenes serotype M49 (strain NZ131) OX=471876 GN=rpsL PE=3 SV=1	ALNIGYNSHKKVQTK	S	48	M	yes	2171.12	1133.09	1028.98	1418.22	1704.6	1639.64	4022.79	1395.13	1413.88	11483.8	93.3	52.5	55.4	86.8	77.6	63.7	152.5	63.2	75.4	682.5
2409	2	B5XI40	30S ribosomal protein S6 OS=Streptococcus pyogenes serotype M49 (strain NZ131) OX=471876 GN=rpsF PE=3 SV=1	ALVARFDSILTDNGA	S	28	M P	yes	877.679	2243.73	685.772	4162.07	1350.95	1824.33	8564.36	1005.99	1877.8	7020.22	18.4	46	15.3	102.4	28.5	31.9	145	20.2	39.7	140.5
2015	2	A0A0H3C1H3	Fructose-bisphosphate aldolase class II OS=Streptococcus pyogenes serotype M49 (strain NZ131) OX=471876 GN=fba PE=4 SV=1	APVLIQTSMGAAKYM	S	50	M P L	yes	625.57	2721.25	356.792	446.825	805.508	1072.74	14838.8	604.991	826.853	713.147	5.6	25.2	3.7	4.8	7.1	7.4	110.4	5.1	7.5	6.1
1406	1	A0A0H3BZ23	Cell division protein FtsZ OS=Streptococcus pyogenes serotype M49 (strain NZ131) OX=471876 GN=ftsZ PE=3 SV=1	ASDQAKQSVQPGFDR	S	354	M	yes	1753.94	657.197	2600.5	3888.95	1486.67	1727.18	5867.9	1633.75	4303.21	6399.14	38.7	14.3	56.9	85.7	34.5	35.3	113.8	36.8	95.1	133.2
606	2	A0A0H3BZL9	PTS system_ fructose-specific IIABC component OS=Streptococcus pyogenes serotype M49 (strain NZ131) OX=471876 GN=fruA PE=4 SV=1	AVSTEKTSLGGAFYK	S	284	M L	yes	3703.25	2087.99	2729.74	8752.1	3322.13	3367.12	4109.23	2831.99	5194.7	14687.1	74.8	71.3	72.8	297.5	74	60.7	64.2	74.7	166.7	425.4
558	2	A0A0H3BYA0	PTS system_ IIB component_ putative OS=Streptococcus pyogenes serotype M49 (strain NZ131) OX=471876 GN=Spy49_1328c PE=4 SV=1	CGAGVNSSHQIKDAI	S	15	M P L	yes	6685.18	2402.38	5345.55	26081.5	5371.34	3441.23	7075.06	4599.83	3011.91	2285.72	431	571.4	307.8	896.9	324.6	359.8	663.2	311.1	620.4	494.2
634	5	A0A0H3BZC1	Uncharacterized protein OS=Streptococcus pyogenes serotype M49 (strain NZ131) OX=471876 GN=Spy49_0377 PE=4 SV=1	DDAVDFDTKVMTLPE	T	30	M L	yes	39734.2	20713.3	30717.5	6077.74	39430.7	12877.5	3017.54	26264	5576.16	8732.48	25870.2	16085.1	18538.4	5758	27424.6	10889.6	8742.4	17507.3	3715.5	7556.4
2471	1	B5XJ36	50S ribosomal protein L3 OS=Streptococcus pyogenes serotype M49 (strain NZ131) OX=471876 GN=rplC PE=3 SV=1	DDKREVLSNKPAKGH	S	61	M	yes	238.097	329.251	157.773	471.877	225.32	261.418	461.809	203.845	610.615	9065.59	6.1	8.3	4.5	15.1	6.2	6.8	11.4	5.6	17.1	297.1
44	3	A0A0H3BZD6	Putative PTS system enzyme II OS=Streptococcus pyogenes serotype M49 (strain NZ131) OX=471876 GN=Spy49_1737c PE=4 SV=1	DEAKLPETPVSDAPV	T	504	M P L	yes	23347.3	12679.6	19406.2	111043	25650.2	17556.9	45977.2	26393.7	24685.4	59369	1769.3	2285.4	1098.5	8501.4	2156.2	2568	5700.5	2276.9	3961.7	8783.8
193	2	A0A0H3C2P8	Uncharacterized protein OS=Streptococcus pyogenes serotype M49 (strain NZ131) OX=471876 GN=Spy49_1748c PE=4 SV=1	DEFIRKETIELANDG	T	13	M L	yes	52723.6	14014.8	33888.3	11783	56497.8	34463.2	20855.4	45096.9	21925.7	14038.9	69805.2	24653.5	54141.8	19463.3	71372.4	38738.7	23307.6	61442.9	36047.8	23667.8
7446	1	A0A0H3BZL9	PTS system_ fructose-specific IIABC component OS=Streptococcus pyogenes serotype M49 (strain NZ131) OX=471876 GN=fruA PE=4 SV=1	DGIAMPHSKNIVVDK	S	68	P	yes	138.624	76.1397	142.486	450.108	215.49	188.603	761.68	197.14	165.158	1598.52	2.8	2.6	3.8	15.3	4.8	3.4	11.9	5.2	5.3	46.3
3129	1	B5XKP7	ATP synthase subunit b OS=Streptococcus pyogenes serotype M49 (strain NZ131) OX=471876 GN=atpF PE=3 SV=1	DIDQAEQSRLSAQQL	S	55	M	yes	1350.15	1126.77	846.122	3723.29	1258.34	1165.58	1432.08	1060.31	1839.59	6490.37	143.9	133.7	96.9	415.6	144.5	145.2	194.5	113.8	205.2	695.2
353	1	A0A0H3BXI0	Uncharacterized protein OS=Streptococcus pyogenes serotype M49 (strain NZ131) OX=471876 GN=Spy49_1001c PE=3 SV=1	DIPAIAESIKAIVSQ	S	85	M P	yes	1213.21	1249.8	1515.36	11933.8	988.664	704.818	1324.81	2103.82	7250.19	30630.6	24.5	16.7	25.8	177.2	14.8	12.5	18.2	30.7	101	484.2
2346	1	A0A0H3BZ39	Fc-gamma receptor OS=Streptococcus pyogenes serotype M49 (strain NZ131) OX=471876 GN=Spy49_1672c PE=4 SV=1	DKELSFLSKVLDEAA	S	100	M	yes	5071.6	3367.08	2994.41	689.848	1009.8	648.595	299.65	313.627	780.382	611.506	351	198.4	218	52.4	82.2	58	22.3	21.6	46.3	37.8
1016	2	B5XMA2	UDP-N-acetylglucosamine--N-acetylmuramyl-(pentapeptide) pyrophosphoryl-undecaprenol N-acetylglucosamine transferase OS=Streptococcus pyogenes serotype M49 (strain NZ131) OX=471876 GN=murG PE=3 SV=1	DLLRADISSAIKEK-	S	354	M L	yes	1295.05	2056.86	1536.07	5289.89	1515.55	1386.59	2060.81	1736.12	4957.47	12472.5	2619.9	4349.8	2891.1	7063.1	2617.9	2000.3	2299.3	3491	10704.2	21783.8
2534	2	A0A0H3BXY9	Isoleucine--tRNA ligase OS=Streptococcus pyogenes serotype M49 (strain NZ131) OX=471876 GN=ileS PE=3 SV=1	DPTTRMRSYNAFVCD	S	888	M	yes	1441.45	1312.04	759.626	10336	1134.5	1191.32	4095.53	1504.13	2273	4019.2	143	138.4	79.5	1228.2	114.7	84.6	269.6	161.1	243.3	427.1
677	4	A0A0H3BZR7	Mid-cell-anchored protein Z OS=Streptococcus pyogenes serotype M49 (strain NZ131) OX=471876 GN=mapZ PE=3 SV=1	DQFLSEDSHHPAKQN	S	167	M P	yes	11071.1	6621.87	10859.2	18257.2	10013.3	7500.85	8792.21	9767.63	11552.8	19704	1044	653.4	1089.8	2082.7	1088.5	662.9	728.4	1017	1133.1	2155.7
356	2	A0A0H3BZ18	Cell-division initiation protein OS=Streptococcus pyogenes serotype M49 (strain NZ131) OX=471876 GN=divIVA PE=4 SV=1	DSASFDATRQFTPEE	T	201	M P	yes	122229	163839	187795	74204.8	94352.7	27662.5	16523.7	141170	99023.2	76037	5221.4	7425.2	8216.1	3494.2	4007.4	901.1	718.4	6108.3	4414.5	3736.2
3187	2	B5XJ52	50S ribosomal protein L18 OS=Streptococcus pyogenes serotype M49 (strain NZ131) OX=471876 GN=rplR PE=3 SV=1	DVSKGTKTEQAVVVG	T	69	M	yes	777.754	946.39	434.248	582.117	787.412	668.263	1178.8	767.029	1030.24	7782.94	39.8	45.1	25.2	36.4	44.8	37.5	56.8	39.1	49.6	451.5
3094	1	A0A0H3BWH3	Putative calcium-transporting ATPase OS=Streptococcus pyogenes serotype M49 (strain NZ131) OX=471876 GN=pacL PE=4 SV=1	EAALTGESVPVEKDL	S	178	M P	yes	1512.44	614.256	1366.9	1480.36	1385.34	1230.14	2065.04	1184.05	1480.25	2812.99	175.1	66	134.3	162.2	142.4	114.3	229.3	133.9	165.7	296.4
2274	1	A0A0H3C219	Uncharacterized protein OS=Streptococcus pyogenes serotype M49 (strain NZ131) OX=471876 GN=Spy49_1782 PE=4 SV=1	EAASEIISNVLGKHL	S	60	M	yes	1458.6	782.204	576.424	3307.57	2074.67	1192.85	3196.02	1621.29	1768.17	3888	455	339.4	414.2	2823.3	625.9	357.6	834.2	524.5	632.3	1428.7
5166	1	B5XK64	Ribosome-recycling factor OS=Streptococcus pyogenes serotype M49 (strain NZ131) OX=471876 GN=frr PE=3 SV=1	EARVLLISPFDKSSI	S	68	M	yes	203.279	172.08	138.067	1817.65	249.373	247.526	963.493	200.537	561.171	3005.41	7.7	6.3	6.1	83.8	9.4	7.8	25.7	7.6	21.8	115.8
302	1	A0A0H3C004	Uncharacterized protein OS=Streptococcus pyogenes serotype M49 (strain NZ131) OX=471876 GN=Spy49_0627 PE=4 SV=1	EEKIVDDTIGTRTRK	T	14	M L	yes	14672	4927.1	10755.5	8982.74	13442.9	7838.87	4397.14	12348.6	9359.86	9071.88	4964.8	1876	3419.4	2509.9	4014.4	2218.7	1615.6	4243.4	3280.8	2996.9
2727	2	B5XLE2	50S ribosomal protein L10 OS=Streptococcus pyogenes serotype M49 (strain NZ131) OX=471876 GN=rplJ PE=3 SV=1	EFKVIKNSILTRAAE	S	59	M	yes	14.3557	150.625	8.25833	20.4128	8.56251	19.9269	828.622	9.7544	63.3301	7782.59	0.3	3.1	0.2	0.6	0.2	0.4	13.1	0.2	1.3	184
1135	2	A0A0H3BXI0	Uncharacterized protein OS=Streptococcus pyogenes serotype M49 (strain NZ131) OX=471876 GN=Spy49_1001c PE=3 SV=1	EKLKDTISDTVNSDE	S	152	M P L	yes	6165.1	4797.12	5914.58	13334.6	6893.93	6506.88	17339	6099.02	8212.1	18845.2	124.5	64.1	100.7	198	103.2	115.4	238.2	89	114.4	297.9
1933	2	A0A0H3BZL3	Conserved hypothetical integral membrane protein OS=Streptococcus pyogenes serotype M49 (strain NZ131) OX=471876 GN=Spy49_1194c PE=4 SV=1	ELFQLQNSGEDLNKR	S	186	P	yes	2992.82	1693.6	1848.66	9781.35	2744.52	1828.39	2075.65	2510.78	1973.67	1901.2	1083.2	1068.7	480.5	1400.2	798	995.6	685.8	761.4	1146.6	1113.4
2793	1	B5XHZ0	Chaperone protein DnaK OS=Streptococcus pyogenes serotype M49 (strain NZ131) OX=471876 GN=dnaK PE=3 SV=1	ELKAAQESGNLDDMK	S	548	M P	yes	299.253	430.023	431.669	3148.39	622.787	514.206	3032.63	559.541	1169.77	4488.72	2.9	2.5	3.8	28.7	6.5	4.9	24	4	7.4	30.7
3006	1	B5XIW7	60 kDa chaperonin OS=Streptococcus pyogenes serotype M49 (strain NZ131) OX=471876 GN=groL PE=3 SV=1	ELKDATMTALGQAAK	T	313	M P	yes	588.44	1329.99	772.86	2712.33	989.775	805.417	4280.3	884.448	1441.03	4008.74	4.5	7.4	6.4	22.4	9.7	9.4	40	6.1	8.2	23.3
242	5	A0A0H3BZR7	Mid-cell-anchored protein Z OS=Streptococcus pyogenes serotype M49 (strain NZ131) OX=471876 GN=mapZ PE=3 SV=1	ESKEVEVTKESQTLG	T	11	M P L	yes	47517.5	17908.6	39537.7	8689.83	44800	24601.5	5562.13	42897.9	20797.3	6100.31	4480.9	1767.1	3967.9	991.3	4870	2174.2	460.8	4466.5	2039.8	667.4
5438	1	B5XKI1	Elongation factor Tu OS=Streptococcus pyogenes serotype M49 (strain NZ131) OX=471876 GN=tuf PE=3 SV=1	ETKKAVVTGVEMFRK	T	261	M	yes	96.0967	582.206	119.328	1803.84	186.123	214.883	1330.44	246.284	372.322	1547.8	0.4	2.3	0.5	6.9	0.8	0.9	5.6	1	1.4	5.4
2331	1	A0A0H3BZQ5	SSU ribosomal protein S1p OS=Streptococcus pyogenes serotype M49 (strain NZ131) OX=471876 GN=rpsA PE=4 SV=1	EVEVKVLSIDEEAGR	S	249	M P	yes	727.943	1495.2	498.504	3534.8	977.083	1704.04	5258.72	629.929	1170.14	3802.81	12.6	27.5	10	77.9	17.5	25	74.1	10.8	22.4	75.8
2062	2	A0A0H3C2S7	Uncharacterized protein OS=Streptococcus pyogenes serotype M49 (strain NZ131) OX=471876 GN=Spy49_1801c PE=4 SV=1	EVSKNKETLVIPVKT	T	125	M L	yes	5478.22	1164.42	2494.49	860.952	4437.01	985.08	664.007	2124.94	224.32	1083.3	1276.2	309.2	828	392	997.2	203	167.2	477.1	63.1	372.2
1969	2	B5XIW8	10 kDa chaperonin OS=Streptococcus pyogenes serotype M49 (strain NZ131) OX=471876 GN=groS PE=3 SV=1	FDDEKEQTVGGFVLA	T	20	M P	yes	8187.41	1664.84	4696.39	2325.71	5101.59	1998.19	2053.27	6522.63	5483.66	4397.17	150.4	22	89.2	49.6	112.5	59.8	60.4	94.1	65.7	55.4
6238	1	A0A0H3BYB7	LSU ribosomal protein L23p (L23Ae) OS=Streptococcus pyogenes serotype M49 (strain NZ131) OX=471876 GN=rplW PE=3 SV=1	FDGVKVASVNTVNVK	S	53	P	yes	133.398	17.2219	74.8387	114.555	102.612	44.841	286.714	56.6419	89.9484	3867.58	3.6	0.5	2.3	3.6	3.1	1.2	6.1	1.6	2.7	142.3
7835	1	A0A0H3BYQ9	PTS system, IIB component OS=Streptococcus pyogenes serotype M49 (strain NZ131) OX=471876 GN=Spy49_0834 PE=4 SV=1	FDKSDPASKVKVTPS	S	116	M	yes	170.642	13.4627	81.6061	1669.47	151.367	33.0298	329.397	97.7581	233.734	572.64	7.2	1.8	3.2	50.3	6.2	2.1	17.7	4.7	31.2	58.5
2440	1	A0A0H3C2K4	Alkyl hydroperoxide reductase C OS=Streptococcus pyogenes serotype M49 (strain NZ131) OX=471876 GN=ahpC PE=3 SV=1	GAETLTPSLDLVGKI	S	179	M P	yes	779.47	1158.62	558.433	5298.02	765.231	464.348	1430.77	1240.83	2873.17	5729.8	19.9	21.9	12.4	98	15.9	12	29.2	22.9	51.6	106.6
6954	1	A0A0H3BXC6	Signal recognition particle receptor FtsY OS=Streptococcus pyogenes serotype M49 (strain NZ131) OX=471876 GN=ftsY PE=3 SV=1	GFSARLNSFFANFRR	S	232	M	yes	213.754	122.445	141.622	1276.89	240.086	128.484	732.681	232.511	408.676	1697.45	21.7	9.5	13.7	135.4	24.7	14.6	70.5	21.2	33	143.7
405	2	A0A0H3BZJ0	Formate acetyltransferase OS=Streptococcus pyogenes serotype M49 (strain NZ131) OX=471876 GN=pfl PE=3 SV=1	GIFRAYTSNIRRARH	S	155	M L	yes	3858.93	1829.04	2802.78	26177.6	3292.07	3968.41	6440.68	3282.34	4399.97	20489.2	68.8	109.9	52.7	438.6	71.2	114	467	81.2	240.5	789.2
1252	1	A0A0H3BYE4	Signal recognition particle protein OS=Streptococcus pyogenes serotype M49 (strain NZ131) OX=471876 GN=ffh PE=3 SV=1	GKKKLSESDVQEVTK	S	26	M P L	yes	1670.71	1507.09	1682.15	5114.76	2015.76	1800.64	6416.64	1585.56	3529.55	9150.27	111.2	82.6	109.2	356.9	146.4	140.8	518	100.6	200.7	544.3
488	4	B5XJR1	Elongation factor G OS=Streptococcus pyogenes serotype M49 (strain NZ131) OX=471876 GN=fusA PE=3 SV=1	GMEAHGNSQIVRAYV	S	638	M P L	yes	8160.63	5192.33	7946.77	23001.7	12860.4	24743.4	19006.4	8670.59	12310.8	50979.1	95.1	58.6	93.8	279.1	145.8	227.2	185.2	96.1	138	538.4
1441	2	B5XKM7	Enolase OS=Streptococcus pyogenes serotype M49 (strain NZ131) OX=471876 GN=eno PE=3 SV=1	GMVPSGASTGEHEAV	S	42	M P	yes	1783.52	1406.69	1358.47	3702.37	2221.93	3294.92	38417	1940.75	1114.02	2409.27	10.7	8.9	8.7	25.9	14.1	17	172.1	11.2	6.7	14.9
2418	2	B5XLJ2	Serine hydroxymethyltransferase OS=Streptococcus pyogenes serotype M49 (strain NZ131) OX=471876 GN=glyA PE=3 SV=1	GSVLTNKYAEGYPGN	Y	55	M	yes	270.029	1266.35	275.481	1225.07	433.664	655.287	9112.08	505.701	1685.47	3073.5	147.9	634.3	134.1	627.3	244.5	292.5	3914	308.3	889.2	1642
9190	1	B5XIW7	60 kDa chaperonin OS=Streptococcus pyogenes serotype M49 (strain NZ131) OX=471876 GN=groL PE=3 SV=1	GVITIEESRGMETEL	S	178	P	yes	183.07	179.729	96.6075	133.195	112.243	197.07	3146.02	115.993	175.735	258.074	1.4	1	0.8	1.1	1.1	2.3	29.4	0.8	1	1.5
7170	2	A0A0H3BYY9	Superoxide dismutase OS=Streptococcus pyogenes serotype M49 (strain NZ131) OX=471876 GN=sodM PE=3 SV=1	HHDKHHATYVANTNA	T	34	P	yes	205.401	127.341	131.27	802.612	247.678	418.704	2892.22	170.587	217.824	1167.55	21.3	6	7.8	44.1	11	41.3	272.4	10.2	12.8	51.5
2872	1	A0A0H3C002	Uncharacterized protein OS=Streptococcus pyogenes serotype M49 (strain NZ131) OX=471876 GN=Spy49_1390c PE=4 SV=1	HRLMDSDTIETPRSY	T	308	M	yes	1818.66	907.871	2152.89	1483.59	2792.16	1961.83	1837.6	2200.27	2047.93	2449.79	390	276.6	509.2	335.1	612.1	379.8	393.9	526.7	556.8	583.7
754	1	A0A0H3BZ43	Uncharacterized protein OS=Streptococcus pyogenes serotype M49 (strain NZ131) OX=471876 GN=Spy49_1003c PE=3 SV=1	HVPTIYDSIKSIVEE	S	96	M	yes	2081.01	2692.83	1585.11	13791	2172.17	1341.36	7800.55	2231.78	3935.05	14656.6	49.3	50	35.9	260.5	43.9	31.4	139.9	46.2	75	294.4
3064	2	B5XJR1	Elongation factor G OS=Streptococcus pyogenes serotype M49 (strain NZ131) OX=471876 GN=fusA PE=3 SV=1	HYEDVPKSVQEEIIK	S	680	M	yes	823.786	930.367	889.564	1738.94	793.854	1546.47	10898.9	676.685	892.087	2603.87	9.6	10.5	10.5	21.1	9	14.2	106.2	7.5	10	27.5
2626	1	A0A0H3BYE4	Signal recognition particle protein OS=Streptococcus pyogenes serotype M49 (strain NZ131) OX=471876 GN=ffh PE=3 SV=1	IAAGSGNSFVEVNKF	S	409	M P L	yes	1508.45	1007.16	1047.49	3022.42	1283.26	679.075	1108.67	1345.99	2066.38	5680.46	100.4	55.2	68	210.9	93.2	53.1	89.5	85.4	117.5	337.9
2290	1	A0A0H3BYQ3	30S ribosomal protein S3 OS=Streptococcus pyogenes serotype M49 (strain NZ131) OX=471876 GN=rpsC PE=3 SV=1	IARAEGYSEGTVPLH	S	159	M P L	yes	885.99	506.339	597.807	983.215	741.778	734.219	2972.56	837.188	2413.77	10680.5	11.6	7	9.4	15.5	10.4	8.9	37.4	10.9	33.2	147.7
3406	1	A0A0H3BYB9	Tagatose-6-phosphate kinase OS=Streptococcus pyogenes serotype M49 (strain NZ131) OX=471876 GN=fruK PE=3 SV=1	IDQINLGSVNRMASD	S	24	P	yes	638.068	651.583	327.842	2049.43	601.006	762.333	3846.1	405.217	570.039	1901.02	44.5	68.3	30.5	234.3	42	43.4	192	36.3	57.3	171.1
1905	1	A0A0H3BY55	Non-specific serine/threonine protein kinase OS=Streptococcus pyogenes serotype M49 (strain NZ131) OX=471876 GN=Spy49_1257c PE=4 SV=1	IKVLRTNYQTDQVAV	Y	48	M P L	yes	1533.15	853.359	1633.02	3637.84	1306.96	1126.93	903.317	1396.62	2593.7	3629.56	255.3	112	208.5	476	215.6	200.9	155.5	206.3	378.4	514.2
3602	1	B5XJR1	Elongation factor G OS=Streptococcus pyogenes serotype M49 (strain NZ131) OX=471876 GN=fusA PE=3 SV=1	ILQMHANSRQEIETV	S	361	M	yes	317.501	318.983	288.049	1293.9	388.106	631.655	3499.57	342.854	338.993	1675.95	3.7	3.6	3.4	15.7	4.4	5.8	34.1	3.8	3.8	17.7
86	3	A0A0H3BZ85	Putative endopeptidase Clp ATP-binding chain C OS=Streptococcus pyogenes serotype M49 (strain NZ131) OX=471876 GN=clpC PE=3 SV=1	ILSRELTSGHTLKIG	S	796	M L	yes	11759.3	8687.08	10940.5	69019	9704.61	9263.54	19609.5	12998.5	38593.6	71474.5	1868.9	1173.8	1712.8	11763.7	1694.4	1536.6	4574.6	2204.3	5630.2	11369.4
3632	1	B5XJR0	30S ribosomal protein S7 OS=Streptococcus pyogenes serotype M49 (strain NZ131) OX=471876 GN=rpsG PE=3 SV=1	IMDAANNTGASVKKR	T	131	M P L	yes	109.359	63.4035	146.224	525.407	206.042	581.409	5495.89	162.057	314.398	3433.17	1.5	0.9	2.3	8.8	3	7.6	76.2	2.3	4.6	53.4
802	2	A0A0H3BY55	Non-specific serine/threonine protein kinase OS=Streptococcus pyogenes serotype M49 (strain NZ131) OX=471876 GN=Spy49_1257c PE=4 SV=1	IQNHAPLSNNEVVRI	S	109	M P L	yes	3859.6	2522.74	3439.91	19573.3	3157.67	2228.06	11760.6	3262.38	4938.58	11778.1	642.7	331.1	439.2	2561.1	520.9	397.2	2024.5	481.9	720.5	1668.6
1882	4	B5XJ39	50S ribosomal protein L2 OS=Streptococcus pyogenes serotype M49 (strain NZ131) OX=471876 GN=rplB PE=3 SV=1	IRPTVRGSVMNPNDH	S	223	M P L	yes	708.903	297.594	506.813	839.189	500.276	478.606	1901.51	430.711	1751.9	28953.3	5.9	2.6	4.9	8.7	4.5	4	16.6	3.9	16.8	275.4
4344	2	A0A0H3BWH3	Putative calcium-transporting ATPase OS=Streptococcus pyogenes serotype M49 (strain NZ131) OX=471876 GN=pacL PE=4 SV=1	IRRDGHVTEIDSKEL	T	134	M	yes	592.538	308.99	466.152	2136.58	419.298	311.034	1087	372.282	652.13	2309.05	68.6	33.2	45.8	234.1	43.1	28.9	120.7	42.1	73	243.3
996	3	B5XJ60	30S ribosomal protein S13 OS=Streptococcus pyogenes serotype M49 (strain NZ131) OX=471876 GN=rpsM PE=3 SV=1	IRVKDLTSDQEDAIR	S	50	M P L	yes	4485.2	3210.05	3107.55	10231.5	4782.13	8876.49	45072.8	3784.91	5860.44	20553.1	141.9	96.7	105	377.4	156.4	273.4	1216.4	114.6	185.8	670.4
986	2	B5XHV3	Translation initiation factor IF-2 OS=Streptococcus pyogenes serotype M49 (strain NZ131) OX=471876 GN=infB PE=3 SV=1	ISSFSKASKPDVTAS	S	54	P	yes	3849.16	3084.17	2557.19	2806.8	2973.31	3465.14	7943.53	4333.56	6018.27	11178.3	260	179	193	203.2	201.3	235.2	569.8	273.9	350.9	643.8
4502	1	A0A0H3BZ76	Putative phosphoprotein phosphatase (PppL protein) OS=Streptococcus pyogenes serotype M49 (strain NZ131) OX=471876 GN=pppL PE=4 SV=1	ITEEEAASHPQRNII	S	155	M	yes	501.017	265.021	539.546	1827.33	576.63	641.791	2349.45	539.288	871.365	2659.06	39.7	16.6	42.1	187.1	47.5	48.1	141.4	41.2	57.8	179.6
1809	1	B5XMC3	Arginine deiminase OS=Streptococcus pyogenes serotype M49 (strain NZ131) OX=471876 GN=arcA PE=3 SV=1	ITNAILESKGLKLIK	S	379	M P	yes	1141.67	796.385	752.26	5149.91	1013.32	1140.38	3943.26	1080.44	1599.67	5557.54	13.7	18	7.9	35.3	11.6	19.9	58.8	11.4	31	97.1
2885	1	B5XK64	Ribosome-recycling factor OS=Streptococcus pyogenes serotype M49 (strain NZ131) OX=471876 GN=frr PE=3 SV=1	ITPANDGSVIRLVIP	S	96	P L	yes	628.317	333.234	387.041	5695.88	636.698	828.259	6755.7	604.248	1639.75	9252.42	23.8	12.2	17.1	262.6	24	26.1	180.2	22.9	63.7	356.5
2957	1	A0A0H3BVE1	30S ribosomal protein S5 OS=Streptococcus pyogenes serotype M49 (strain NZ131) OX=471876 GN=rpsE PE=3 SV=1	ITSKSLGSNTPINIV	S	129	M P	yes	820.214	2025.26	487.78	1138.01	489.322	519.482	2307.64	430.996	843.906	10002.8	10.1	24.9	7	18	6.7	6.3	28.3	5.1	10.2	125.9
1241	2	B5XJ55	50S ribosomal protein L15 OS=Streptococcus pyogenes serotype M49 (strain NZ131) OX=471876 GN=rplO PE=3 SV=1	KAAKFSKSAEAAIIA	S	131	M L	yes	1414.97	3596.6	1213.7	4194.01	1611.41	2215.3	2991.83	1247.51	1946.21	11830.2	36	92.2	33.5	129	41.6	48.5	76.4	33.1	54.6	565.5
1477	1	B5XHX4	Serine--tRNA ligase OS=Streptococcus pyogenes serotype M49 (strain NZ131) OX=471876 GN=serS PE=3 SV=1	KAERNIASAAIAQAK	S	56	M P L	yes	511.18	781.238	384.724	3006.98	783.821	1098.66	3045.42	621.701	997.442	8860.5	61.9	94.7	50.6	337.6	97.5	110.4	278.8	70.3	112.1	1054.7
225	2	B5XIW7	60 kDa chaperonin OS=Streptococcus pyogenes serotype M49 (strain NZ131) OX=471876 GN=groL PE=3 SV=1	KAIAQPVSGKEAIAQ	S	138	M L	yes	11716.5	12401.3	13319.8	31591.4	11826.3	10479	17206.8	12759.2	23320.1	61163.4	89.6	69	110.3	260.9	115.9	122.3	160.8	88	132.7	355.5
3983	2	B5XJR1	Elongation factor G OS=Streptococcus pyogenes serotype M49 (strain NZ131) OX=471876 GN=fusA PE=3 SV=1	KAKLYDGSYHDVDSS	S	569	P	yes	858.11	265.819	593.043	2587.8	864.419	1121.73	7584.1	739.842	767.195	3579.14	10	3	7	31.4	9.8	10.3	73.9	8.2	8.6	37.8
598	2	A0A0H3BZC7	EIIAB-Man OS=Streptococcus pyogenes serotype M49 (strain NZ131) OX=471876 GN=manL PE=4 SV=1	KANVVPISKLIEASK	S	230	M L	yes	4278.31	3148.03	2986.68	7931.64	3845.15	4563.76	9799.89	3494.57	4828.47	9775.65	90.2	87.8	71.1	227.1	85.1	62.5	123.2	78	128.8	276.6
2267	1	A0A0H3BX27	Dihydrolipoyl dehydrogenase OS=Streptococcus pyogenes serotype M49 (strain NZ131) OX=471876 GN=acoL PE=3 SV=1	KAPAQAASAAPKAAL	S	118	M	yes	823.841	868.053	725.576	1001.98	886.517	1309.88	3840.75	929.479	1874.55	3034.76	66.4	58	44.7	75.6	54.8	73.6	168.5	70.3	156.5	249.1
2811	2	A0A0H3BWH3	Putative calcium-transporting ATPase OS=Streptococcus pyogenes serotype M49 (strain NZ131) OX=471876 GN=pacL PE=4 SV=1	KDLSTAVSKDAGIGD	S	190	M	yes	2377.06	1299.25	1844.25	5999.95	3545.06	2588.36	5340.46	2444.15	2371.79	6568.4	275.2	139.6	181.2	657.4	364.4	240.5	593	276.4	265.5	692.1
4343	2	B5XJ47	50S ribosomal protein L24 OS=Streptococcus pyogenes serotype M49 (strain NZ131) OX=471876 GN=rplX PE=3 SV=1	KEAPIHVSNVQVLDK	S	66	P	yes	112.088	124.166	39.1329	567.333	109.155	98.4339	1288.83	63.2478	168.093	7440.78	2.1	2.5	0.9	14.9	2.3	1.8	23.1	1.3	3.7	295
2035	2	A0A0H3BXI0	Uncharacterized protein OS=Streptococcus pyogenes serotype M49 (strain NZ131) OX=471876 GN=Spy49_1001c PE=3 SV=1	KEEHEAASVTVQDRV	S	122	M P	yes	1426.14	995.346	1227.56	3939.76	1516.4	1629.54	5932.52	1480.21	2526.8	4542.08	28.8	13.3	20.9	58.5	22.7	28.9	81.5	21.6	35.2	71.8
441	2	A0A0H3C1S0	CsbD domain-containing protein OS=Streptococcus pyogenes serotype M49 (strain NZ131) OX=471876 GN=Spy49_1665c PE=3 SV=1	KEGAGKLTGDKELEA	T	25	M P L	yes	3969.78	2598.38	3286.63	6079.78	3939.02	4840.1	25681	4729.86	8918.36	8466.04	255.2	145.2	349.7	586.4	238.4	270.7	910.6	230.8	449.2	736.3
1425	1	A0A0H3BXY9	Isoleucine--tRNA ligase OS=Streptococcus pyogenes serotype M49 (strain NZ131) OX=471876 GN=ileS PE=3 SV=1	KGEKMSKSKGNIISP	S	584	M	yes	1505.97	1045.65	1124.63	1572.87	1609.27	3076.87	18281	1374.36	1207.03	1604.48	149.4	110.3	117.7	186.9	162.7	218.5	1203.4	147.2	129.2	170.5
4834	2	B5XKI1	Elongation factor Tu OS=Streptococcus pyogenes serotype M49 (strain NZ131) OX=471876 GN=tuf PE=3 SV=1	KGEVYILSKDEGGRH	S	317	P	yes	480.484	506.266	525.042	2065.26	465.308	596.898	3064.77	541.826	744.644	2063.73	2	2	2.2	7.9	2	2.5	12.9	2.2	2.8	7.2
1157	1	A0A0H3C228	L-serine dehydratase OS=Streptococcus pyogenes serotype M49 (strain NZ131) OX=471876 GN=sdhA PE=3 SV=1	KGNSLSDTTILNAVR	T	88	M	yes	3472.96	2330.25	2981.61	5593.44	5343.64	3784.53	3837.79	4856.31	3181.87	3420.54	807.2	646.4	683.6	603.4	1180.8	756.3	634.1	965.6	770.3	886.5
1445	1	A0A0H3C1B0	Uncharacterized protein OS=Streptococcus pyogenes serotype M49 (strain NZ131) OX=471876 GN=Spy49_1166 PE=4 SV=1	KIVIPGQSKTLHTNN	S	83	M	yes	1980.83	950.283	1059.46	3436.46	2221.55	1657.99	4483.67	1338.53	2361.11	4676.9	333	147.5	200.7	569.5	339	225.5	505	203.7	388.9	789.9
1548	1	A0A0H3C2S7	Uncharacterized protein OS=Streptococcus pyogenes serotype M49 (strain NZ131) OX=471876 GN=Spy49_1801c PE=4 SV=1	KKDSDIKSVTEIVEE	S	87	M P L	yes	2780.32	2045.27	1399.99	6062.69	3068.8	2357.4	5901.8	2613.09	1938.54	7902.08	647.7	543.1	464.7	2760.4	689.7	485.8	1486.1	586.7	545.3	2715
807	2	B5XJ47	50S ribosomal protein L24 OS=Streptococcus pyogenes serotype M49 (strain NZ131) OX=471876 GN=rplX PE=3 SV=1	KKHQKPNTENPQGAI	T	49	M P L	yes	2108.32	1360.86	1378.35	3194.58	1974.28	4063.13	33732.7	1727.15	1962.6	4984.06	39.5	27.4	31.7	83.9	41.6	74.3	604.6	35.5	43.2	197.6
3127	1	A0A0H3BZL9	PTS system_ fructose-specific IIABC component OS=Streptococcus pyogenes serotype M49 (strain NZ131) OX=471876 GN=fruA PE=4 SV=1	KKSQELISLILNNEG	S	257	M P	yes	1084.24	573.976	866.166	2144.63	3384.98	416.036	7796.02	1580.91	610.775	2896.68	21.9	19.6	23.1	72.9	75.4	7.5	121.8	41.7	19.6	83.9
1306	2	A0A0H3BY05	Carbamate kinase OS=Streptococcus pyogenes serotype M49 (strain NZ131) OX=471876 GN=arcC PE=3 SV=1	KLEEVTVSQMKEYIT	S	258	M P L	yes	3239.77	2495.12	1960.15	18725.1	3097.58	2302.62	7864.39	2948.11	3683.71	6426.8	104.8	141.2	43.8	216.2	67.4	79.1	223.7	64.3	208.4	334.8
1757	2	B5XJ40	30S ribosomal protein S19 OS=Streptococcus pyogenes serotype M49 (strain NZ131) OX=471876 GN=rpsS PE=3 SV=1	KLGEFAPTRTYKGHA	T	77	M L	yes	317.775	126.277	223.608	222.09	240.505	257.266	416.003	265.936	937.232	16359.8	8.9	3.8	7.2	7.5	7.2	7.6	16.7	7.6	28.7	543.5
1401	2	B5XHZ0	Chaperone protein DnaK OS=Streptococcus pyogenes serotype M49 (strain NZ131) OX=471876 GN=dnaK PE=3 SV=1	KLIDRNTTIPTSKSQ	T	387	M	yes	1372.43	2408.13	1124.61	4146.66	1245.57	1217.3	8112.29	1384.86	2466	6974.33	13.3	14	9.9	37.8	13	11.6	64.2	9.9	15.6	47.7
21	5	A0A0H3BZD6	Putative PTS system enzyme II OS=Streptococcus pyogenes serotype M49 (strain NZ131) OX=471876 GN=Spy49_1737c PE=4 SV=1	KLPETPVSDAPVATA	S	507	M P L	yes	83839.4	50495.4	68275.8	302211	85305.1	53124.1	152818	87104.2	89649.3	194740	6353.5	9101.4	3864.8	23137.1	7170.9	7770.3	18947.2	7514.2	14387.6	28812.3
1280	1	A0A0H3C114	Inosine-5'-monophosphate dehydrogenase OS=Streptococcus pyogenes serotype M49 (strain NZ131) OX=471876 GN=guaB PE=3 SV=1	KLPLVDNSGRLSGLI	S	194	M	yes	1956.58	1507.65	1593.74	7739.46	2532.26	2024.96	7604.53	1709.97	2702.14	7277.85	41.3	34.8	36.2	181.9	60.1	54.5	181.8	39.4	59.2	150.3
6411	1	A0A0H3C129	3-oxoacyl-[acyl-carrier-protein] reductase OS=Streptococcus pyogenes serotype M49 (strain NZ131) OX=471876 GN=fabG PE=3 SV=1	KMQEQILSQIPMKRI	S	204	P	yes	86.2405	72.4874	51.8917	1217.27	247.746	578.183	3182.09	140.915	130.851	940.958	3.4	5.5	2.6	66.7	7.6	13.5	82.5	6.9	7.7	49.2
1078	1	A0A0H3BZ03	R3H domain protein OS=Streptococcus pyogenes serotype M49 (strain NZ131) OX=471876 GN=Spy49_0209 PE=4 SV=1	KNAPAVNSADVEPEE	S	84	M P L	yes	3406.27	2028.72	2830.48	10250.3	3735.05	3161.03	5004.25	3130.91	5044.49	14236.6	130.2	71.7	109.4	570.4	155	116.6	202.8	120.4	186.8	573.7
549	2	A0A0H3BY55	Non-specific serine/threonine protein kinase OS=Streptococcus pyogenes serotype M49 (strain NZ131) OX=471876 GN=Spy49_1257c PE=4 SV=1	KPLPKVASGPTASVK	S	299	M P	yes	7092.25	6229.52	6933.08	8441.16	7138.56	6643.22	7081.31	6038.01	9567.34	13479.9	1181	817.6	885.2	1104.5	1177.6	1184.3	1219	891.9	1395.8	1909.7
199	9	A0A0H3C1S0	CsbD domain-containing protein OS=Streptococcus pyogenes serotype M49 (strain NZ131) OX=471876 GN=Spy49_1665c PE=3 SV=1	KSKIEQASGGLKEGA	S	14	M P L	yes	29960	30300.2	25531.8	26308.7	16089.9	17313.1	77934.1	13019.4	29213	38831.4	1926	1693.2	2716.6	2537.5	973.8	968.3	2763.4	635.3	1471.4	3377.2
5437	1	A0A0H3BVI6	Putative V-type Na+-ATPase subunit E OS=Streptococcus pyogenes serotype M49 (strain NZ131) OX=471876 GN=ntpE PE=4 SV=1	KTGQKFSSYDCAELR	S	132	M	yes	198.212	145.202	136.104	4590.41	163.353	87.6944	150.133	172.471	252.094	334.437	408.5	541.7	183.8	1658.1	284.3	251	420.1	273.8	825.7	1018
52	6	A0A0H3BZL9	PTS system_ fructose-specific IIABC component OS=Streptococcus pyogenes serotype M49 (strain NZ131) OX=471876 GN=fruA PE=4 SV=1	KVETNGASGVANRLT	S	205	M P L	yes	60930.4	36031.7	42693.4	179584	60022.9	48304.5	98148	53432.5	72557.5	172972	1230.7	1230.4	1138.6	6104.4	1337	870.8	1533.4	1409.4	2328.4	5010
1540	1	A0A0H3BYM9	Glyceraldehyde-3-phosphate dehydrogenase OS=Streptococcus pyogenes serotype M49 (strain NZ131) OX=471876 GN=plr PE=3 SV=1	KVMEVDGSQLVKVVS	S	305	M P L	yes	321.217	661.18	380.085	701.142	590.412	1489.64	17844.4	522.305	618.497	1022.61	1.2	2.5	1.5	2.9	2.5	5.7	68	2	2.2	3.4
1860	1	A0A0H3BXC6	Signal recognition particle receptor FtsY OS=Streptococcus pyogenes serotype M49 (strain NZ131) OX=471876 GN=ftsY PE=3 SV=1	KVSELSQSTASEPKD	S	107	P	yes	1795.73	591.604	1513.39	2380.26	1649.5	1258.44	2232.34	1560.68	3025.44	4716.7	182.3	45.9	146.4	252.4	169.7	143	214.8	142.3	244.3	399.3
989	1	A0A0H3BZD9	Protein GrpE OS=Streptococcus pyogenes serotype M49 (strain NZ131) OX=471876 GN=grpE PE=3 SV=1	LAKAILPSLDNLERA	S	99	M L	yes	191.579	574.765	121.281	15822.6	197.327	109.128	11918.1	183.592	405.181	4901.92	16	35	9.5	1163.1	18.1	7.3	789.3	14	26.7	329.5
59	3	B5XKI1	Elongation factor Tu OS=Streptococcus pyogenes serotype M49 (strain NZ131) OX=471876 GN=tuf PE=3 SV=1	LARRLPTSVNQPKDY	S	43	M P L	yes	17729.8	12935.1	14319.3	78270.8	16332.3	23541.7	71440	19776.6	34227	93555.8	73.8	51.1	60	299.4	70.2	98.6	300.7	80.3	128.7	326.4
9931	2	B5XJ48	50S ribosomal protein L5 OS=Streptococcus pyogenes serotype M49 (strain NZ131) OX=471876 GN=rplE PE=3 SV=1	LITKAKKSIAGFRLR	S	74	M	yes	18.4029	9.91567	8.15806	70.5594	8.49668	30.3475	595.731	28.6723	190.425	1456.61	0.2	0.1	0.1	1	0.1	0.3	5.2	0.3	2.1	17.2
4735	2	A0A0H3BVE1	30S ribosomal protein S5 OS=Streptococcus pyogenes serotype M49 (strain NZ131) OX=471876 GN=rpsE PE=3 SV=1	LKPAVEGSGVAAGGA	S	102	P	yes	495.376	382.278	299.636	746.029	489.322	346.321	1361.75	439.447	438.5	4695.54	6.1	4.7	4.3	11.8	6.7	4.2	16.7	5.2	5.3	59.1
774	1	A0A0H3C2S7	Uncharacterized protein OS=Streptococcus pyogenes serotype M49 (strain NZ131) OX=471876 GN=Spy49_1801c PE=4 SV=1	LKTISPVSQFKSNNR	S	148	M L	yes	6768.15	3941.78	4137.9	1866.64	9795.06	7186.72	2845.46	6664.33	5590.59	3032.48	1576.7	1046.7	1373.5	849.9	2201.4	1481	716.5	1496.3	1572.6	1041.9
1631	2	A0A0H3BZC7	EIIAB-Man OS=Streptococcus pyogenes serotype M49 (strain NZ131) OX=471876 GN=manL PE=4 SV=1	LLHGQVATAWTPASK	T	186	M P L	yes	1603.18	1197.54	1810.49	4145.69	2670.37	3015.74	10945.3	2701.57	1814.43	3481.2	33.8	33.4	43.1	118.7	59.1	41.3	137.6	60.3	48.4	98.5
5774	1	A0A0H3C0F2	Tagatose 1_6-diphosphate aldolase OS=Streptococcus pyogenes serotype M49 (strain NZ131) OX=471876 GN=lacD2 PE=3 SV=1	LLLAYEKTGYDATTT	T	95	M L	yes	406.555	170.737	205.731	1050	292.315	313.931	3083.09	243.44	204.609	355.274	9.8	23.4	6.7	28.7	8	14.1	109.4	8	24.4	32.4
10774	1	A0A0H3BZ23	Cell division protein FtsZ OS=Streptococcus pyogenes serotype M49 (strain NZ131) OX=471876 GN=ftsZ PE=3 SV=1	LMGIGIGSGEERIVE	S	233	P	yes	31.725	36.7663	9.14058	399.332	68.9469	83.1785	1536.59	44.3954	72.3988	965.636	0.7	0.8	0.2	8.8	1.6	1.7	29.8	1	1.6	20.1
1743	3	A0A0H3C049	Spi SpeB protease inhibitor OS=Streptococcus pyogenes serotype M49 (strain NZ131) OX=471876 GN=Spy49_1689c PE=4 SV=1	LNHDNVRSMIEAYQK	S	88	M	yes	4404.83	3515.31	8299.94	29212.7	3424.41	2718.51	4312.01	4363.56	8674.46	13635.4	7535.8	4992.7	19848.4	2390.8	5262.9	7312.3	11389.9	6007.7	12634.8	18138.4
2705	2	A0A0H3BYW2	EIICB-Lac OS=Streptococcus pyogenes serotype M49 (strain NZ131) OX=471876 GN=lacE PE=4 SV=1	LNKAAKEYGAPVTAA	Y	489	P	yes	1366.82	501.725	643.01	4463.72	1351.03	670.572	2247.18	1294.9	1007.35	2095.88	63.7	120.1	44.7	292.1	69.5	56	169.5	80.3	216.8	373.8
5674	1	A0A0H3BZL9	PTS system_ fructose-specific IIABC component OS=Streptococcus pyogenes serotype M49 (strain NZ131) OX=471876 GN=fruA PE=4 SV=1	LNNEGNTYHAKNGKS	Y	267	M P	yes	470.333	474.409	367.465	1697.47	1620.66	227.433	3232.34	765.813	386.408	980.521	9.5	16.2	9.8	57.7	36.1	4.1	50.5	20.2	12.4	28.4
660	1	A0A0H3C178	Putative putative C3-degrading proteinase OS=Streptococcus pyogenes serotype M49 (strain NZ131) OX=471876 GN=cppA PE=4 SV=1	LQGTDLPSLEKDATF	S	136	P	yes	5820.6	4757.68	3828.03	4148.75	5358.73	3814.36	4053.61	6244.02	8696.06	8558.91	1646.4	1422.2	1394.5	1239.8	1544.7	1196.2	1198.4	1817	2559.6	2197
3698	1	B5XHV3	Translation initiation factor IF-2 OS=Streptococcus pyogenes serotype M49 (strain NZ131) OX=471876 GN=infB PE=3 SV=1	LRNSRVATGEAGGIT	T	483	M P	yes	407.122	187.807	332.567	4474.02	471.18	291.708	1104.12	704.066	1697.94	5010.96	27.5	10.9	25.1	323.9	31.9	19.8	79.2	44.5	99	288.6
2556	1	A0A0H3BWD6	Phosphoribosylaminoimidazole-succinocarboxamide synthase OS=Streptococcus pyogenes serotype M49 (strain NZ131) OX=471876 GN=purC PE=3 SV=1	LRNVTAGSFSKRFGV	S	109	M	yes	1418.93	4283.65	851.552	872.222	1142.3	1370.03	8434.86	1053.53	1226.44	1633.35	339.2	928.4	326.5	368.1	297.9	297.9	1843.4	231.7	252.5	329.9
6719	1	B5XJ39	50S ribosomal protein L2 OS=Streptococcus pyogenes serotype M49 (strain NZ131) OX=471876 GN=rplB PE=3 SV=1	LVRAAGASAQVLGQE	S	161	M P	yes	108.138	103.013	31.0294	202.563	55.5862	35.8954	446.739	33.1316	62.5678	3185.49	0.9	0.9	0.3	2.1	0.5	0.3	3.9	0.3	0.6	30.3
972	2	A0A0H3BZ23	Cell division protein FtsZ OS=Streptococcus pyogenes serotype M49 (strain NZ131) OX=471876 GN=ftsZ PE=3 SV=1	-MAFSFDTASIQGAI	T	7	M P L	yes	11475.4	3570.92	6211.02	2359.69	17805.5	2784.03	3181.45	8222.03	1235.31	1393.21	253.2	77.7	135.9	52	413.2	56.9	61.7	185.2	27.3	29
693	3	B5XIW7	60 kDa chaperonin OS=Streptococcus pyogenes serotype M49 (strain NZ131) OX=471876 GN=groL PE=3 SV=1	MAKDIKFSADARAAM	S	8	M L	yes	1726.09	2228.64	1594.02	2433.83	1897.92	4455.5	30978.7	1797.89	2882.06	4215.2	13.2	12.4	13.2	20.1	18.6	52	289.5	12.4	16.4	24.5
575	2	B5XJ02	UPF0297 protein Spy49_1751c OS=Streptococcus pyogenes serotype M49 (strain NZ131) OX=471876 GN=Spy49_1751c PE=3 SV=1	----MGFTDETVRFK	T	4	M L	yes	5026.09	6523.08	8092.67	4374.55	4422.49	4343.06	2975.04	4913.66	11604.7	17090.4	228.3	193.7	345.8	202.7	213.4	285.2	183.2	190.5	357.8	547.4
43	2	B5XJ02	UPF0297 protein Spy49_1751c OS=Streptococcus pyogenes serotype M49 (strain NZ131) OX=471876 GN=Spy49_1751c PE=3 SV=1	-MGFTDETVRFKLDD	T	7	M L	yes	77308.8	107360	80367.4	24494.9	45866.2	6767.37	5709.74	43258.3	12859.8	137688	3511.6	3188	3434.1	1135	2213.2	444.4	351.6	1677.1	396.5	4410.1
23629	1	A0A0H3BVU9	Response regulator CsrR OS=Streptococcus pyogenes serotype M49 (strain NZ131) OX=471876 GN=csrR PE=4 SV=1	MMMTARDSIMDVVAG	S	84	M	yes	0	6.92865	27.3036	174.942	88.2493	108.292	429.798	78.843	89.1864	125.226	0	0.4	1.6	13.2	5.7	6.1	20.3	5.3	5.4	7.9
4068	1	B5XIG1	Trigger factor OS=Streptococcus pyogenes serotype M49 (strain NZ131) OX=471876 GN=tig PE=3 SV=1	MPADQVRSLLSADML	S	400	M	yes	145.898	355.441	181.947	1379.67	575.068	562.808	2012.94	341.561	396.202	2264.95	3.8	10.7	5.5	46.9	16.2	13.1	43.7	9.3	11.8	69.8
3212	1	A0A0H3C0Z3	Uncharacterized protein OS=Streptococcus pyogenes serotype M49 (strain NZ131) OX=471876 GN=Spy49_1787c PE=4 SV=1	------MSDAFTDVA	S	2	M	yes	1476.61	1331.87	1135.64	883.85	1250.66	1217.58	3363.25	1153.27	1518.21	1665.22	707.8	610.4	741	710.4	552.1	416.4	837.2	577.8	861.9	979.9
749	3	A0A0H3C1S0	CsbD domain-containing protein OS=Streptococcus pyogenes serotype M49 (strain NZ131) OX=471876 GN=Spy49_1665c PE=3 SV=1	MSEEKLKSKIEQASG	S	8	M P L	yes	4560.89	3743.68	3090.2	5819.54	5695.39	5544.57	31183.2	5250.39	11765.4	11777.5	293.2	209.2	328.8	561.3	344.7	310.1	1105.7	256.2	592.6	1024.3
519	2	A0A0H3BZR7	Mid-cell-anchored protein Z OS=Streptococcus pyogenes serotype M49 (strain NZ131) OX=471876 GN=mapZ PE=3 SV=1	------MSEESKEVE	S	2	M	yes	7985.16	5029.74	10950.8	6813.01	6861.67	5039.79	3338.72	5664.65	6773.03	7636.81	753	496.3	1099	777.2	745.9	445.4	276.6	589.8	664.3	835.5
432	2	A0A0H3BZR7	Mid-cell-anchored protein Z OS=Streptococcus pyogenes serotype M49 (strain NZ131) OX=471876 GN=mapZ PE=3 SV=1	---MSEESKEVEVTK	S	5	M	yes	7272.54	4996.3	7109.58	8932.65	6594.89	5995.93	10056	6138.15	8700.03	7660.57	685.8	493	713.5	1019	716.9	529.9	833.1	639.1	853.3	838.1
120	2	B5XKM7	Enolase OS=Streptococcus pyogenes serotype M49 (strain NZ131) OX=471876 GN=eno PE=3 SV=1	------MSIITDVYA	S	2	M L	yes	37237.1	31073.7	44579.7	39925.5	20990.2	9594.02	3571.59	24276.7	19919.3	13291.4	223.4	196.6	285.5	279.3	133.2	49.5	16	140.1	119.8	82.2
4197	1	A0A0H3BY96	Phosphate acetyltransferase OS=Streptococcus pyogenes serotype M49 (strain NZ131) OX=471876 GN=pta PE=3 SV=1	---MSIRSLFGGLRE	S	5	M	yes	225.961	185.139	118.889	852.434	280.081	484.558	4321.8	263.212	397.832	532.671	10.7	13.6	5.8	36.2	12.3	17.7	156.5	12.9	28.3	34.2
288	2	B5XKG9	Lysine--tRNA ligase OS=Streptococcus pyogenes serotype M49 (strain NZ131) OX=471876 GN=lysS PE=3 SV=1	------MSNQHIEEL	S	2	M P L	yes	20806.9	13152.6	21923.9	17742.7	13539	6341.08	8185.3	14876.7	11865.7	10916.8	1744.6	1118.1	1779	1561.6	1105.5	516.9	787	1120.1	942.9	920.4
3081	1	A0A0H3BVR1	Amino acid ABC transporter_ ATP-binding protein OS=Streptococcus pyogenes serotype M49 (strain NZ131) OX=471876 GN=Spy49_0236c PE=4 SV=1	------MSNSIIEIK	S	2	M	yes	707.714	692.644	934.437	2397.03	814.249	568.472	1318.9	688.571	1244.85	2796.92	185.7	173.1	206.6	615.4	199.9	104.4	292.9	170.2	307.8	679
6440	2	B5XJ99	30S ribosomal protein S4 OS=Streptococcus pyogenes serotype M49 (strain NZ131) OX=471876 GN=rpsD PE=3 SV=1	MSRYTGPSWKQSRRL	S	8	M	yes	241.318	307.885	154.537	230.584	234.189	211.202	492.315	264.191	342.353	4616.27	4.1	5.7	3.2	5.1	4.5	3.6	8.1	4.9	6.5	93.6
3388	2	B5XMC3	Arginine deiminase OS=Streptococcus pyogenes serotype M49 (strain NZ131) OX=471876 GN=arcA PE=3 SV=1	------MTAQTPIHV	T	2	P	yes	1283.34	902.57	695.127	6915.17	1188.03	1048.69	6498.33	1127.82	1145.57	2581.31	15.4	20.4	7.3	47.4	13.6	18.3	96.9	11.9	22.2	45.1
1777	2	A0A0H3BXH0	Endolytic murein transglycosylase OS=Streptococcus pyogenes serotype M49 (strain NZ131) OX=471876 GN=mltG PE=3 SV=1	------MTDFKDKDQ	T	2	M	yes	2421.44	1825.85	2246.38	2676.54	2297.73	1714.99	1634.88	2007.25	3326.95	3359.58	363.1	278.4	311.1	233	379.2	261.6	261.3	322.2	513.5	514.7
4909	2	B5XMC1	Ornithine carbamoyltransferase OS=Streptococcus pyogenes serotype M49 (strain NZ131) OX=471876 GN=arcB PE=3 SV=1	------MTQVFQGRS	T	2	M	yes	401.519	232.333	264.408	2406.53	345.7	302.343	2357	364.498	506.862	882.478	3.7	3.7	1.9	10.9	2.9	4.4	29.4	3	7.1	9.9
2688	1	A0A0H3C281	50S ribosomal protein L13 OS=Streptococcus pyogenes serotype M49 (strain NZ131) OX=471876 GN=rplM PE=3 SV=1	MYPGGLKSITAGELR	S	88	M L	yes	1216.3	3432.89	1154.01	2150.62	1178.24	1178.45	2911.79	1007.06	1769.81	8581.8	19.1	52.2	18.9	36.1	19.3	19.8	61.1	16.4	28.2	124.3
5321	1	B5XI03	GTP-sensing transcriptional pleiotropic repressor CodY OS=Streptococcus pyogenes serotype M49 (strain NZ131) OX=471876 GN=codY PE=3 SV=1	NEGRLTASVIADRIG	S	208	M	yes	211.276	720.822	113.544	227.664	380.815	785.543	4118.71	166.747	171.713	557.833	34.5	141.3	20.8	42.5	44.9	64.7	332.2	28.9	33.5	97
4057	2	A0A0H3BZX9	PTS system_ mannose-specific IIC component OS=Streptococcus pyogenes serotype M49 (strain NZ131) OX=471876 GN=manM PE=4 SV=1	NGGNAAGSADPIGDI	S	258	P	yes	1116.1	887.316	642.474	8322.24	3390.32	2012.32	13331.2	1751.02	2791.83	5732.25	118	126.5	71.1	961.4	332	133.7	807.7	207.7	368.5	796.8
3095	1	A0A0H3BZ23	Cell division protein FtsZ OS=Streptococcus pyogenes serotype M49 (strain NZ131) OX=471876 GN=ftsZ PE=3 SV=1	NHNQNQGSAFGNWDL	S	391	P	yes	2587.85	2155.42	2280.57	3380.71	3201.72	2505.14	6734.16	3085.48	2384.64	4280.51	57.1	46.9	49.9	74.5	74.3	51.2	130.6	69.5	52.7	89.1
1771	1	B5XJA2	50S ribosomal protein L9 OS=Streptococcus pyogenes serotype M49 (strain NZ131) OX=471876 GN=rplI PE=3 SV=1	NLAKEATSQSIGELK	S	41	M L	yes	415.275	383.191	364.861	2563.84	419.105	757.42	6643.65	406.073	1118.4	6261.93	31.7	25.4	28.3	232.9	33.9	59.5	536.2	29.7	77.2	490
1691	2	A0A0H3BWF1	Protein translocase subunit SecY OS=Streptococcus pyogenes serotype M49 (strain NZ131) OX=471876 GN=secY PE=3 SV=1	NLQKNSSYIPSVRPG	Y	347	M L	yes	949.747	1036.24	720.551	2250.37	892.844	866.243	832.804	839.312	1387.69	23366.3	239.2	306.5	193.2	599.6	234.7	191	158.8	248.7	422.5	6775.1
2222	2	A0A0H3BZ18	Cell-division initiation protein OS=Streptococcus pyogenes serotype M49 (strain NZ131) OX=471876 GN=divIVA PE=4 SV=1	NLVSKATYDAQHLLD	Y	98	M P	yes	1383.48	1385.7	1570.28	9492.75	2276.77	2210.3	3969.91	2188.62	2211.73	4479.35	59.1	62.8	68.7	447	96.7	72	172.6	94.7	98.6	220.1
87	1	B5XKI1	Elongation factor Tu OS=Streptococcus pyogenes serotype M49 (strain NZ131) OX=471876 GN=tuf PE=3 SV=1	NQPKDYASIDAAPEE	S	52	M P L	yes	16889	10125.3	13722.7	59918.7	17984.2	20795.9	65429.2	18003.4	35051.4	77533.2	70.3	40	57.5	229.2	77.3	87.1	275.4	73.1	131.8	270.5
186	1	A0A0H3BXR4	Ribonucleoside-diphosphate reductase OS=Streptococcus pyogenes serotype M49 (strain NZ131) OX=471876 GN=nrdE1 PE=3 SV=1	NQRYQPATPSFLNAG	T	155	P L	yes	1174.95	1562.41	950.599	1081.93	2646.65	30103.4	171382	1209.99	1588.56	1628.49	225.9	256.7	160.7	232.6	475.9	3544.4	20885.8	223.6	298.9	317.9
6934	2	B5XL08	Phosphopentomutase OS=Streptococcus pyogenes serotype M49 (strain NZ131) OX=471876 GN=deoB PE=3 SV=1	NRHDYAVSPFQDTVL	S	227	P	yes	271.983	219.56	114.782	2178.88	322.865	252.435	2778.25	264.497	371.458	1075.17	16.4	15.7	7.9	87.1	18.2	12.8	117.6	14.6	25.1	74.3
638	5	B5XIW7	60 kDa chaperonin OS=Streptococcus pyogenes serotype M49 (strain NZ131) OX=471876 GN=groL PE=3 SV=1	NRIALIKSQLETTTS	S	349	M P L	yes	4066.78	3648.49	4395.64	18756.3	4234.61	2913.21	7362.12	4610.73	10930.7	37162.6	31.1	20.3	36.4	154.9	41.5	34	68.8	31.8	62.2	216
808	2	B5XIY2	Histidine ammonia-lyase OS=Streptococcus pyogenes serotype M49 (strain NZ131) OX=471876 GN=hutH PE=3 SV=1	NTTVATQSRVQDPYT	S	274	M P L	yes	2430.9	2393.05	1746.28	53581.7	2208.52	1289.85	2794.27	2542.99	3252.76	4986.49	2601.5	2049.7	1919	3851.3	2024.9	1707.4	3244.2	1736.7	2624	3992.9
2238	2	B5XJR1	Elongation factor G OS=Streptococcus pyogenes serotype M49 (strain NZ131) OX=471876 GN=fusA PE=3 SV=1	NVGAPQVSYRETFRA	S	480	M P L	yes	883.853	531.638	533.739	1648.28	688.007	893.029	12335.7	703.752	651.224	1789.57	10.3	6	6.3	20	7.8	8.2	120.2	7.8	7.3	18.9
1650	2	A0A0H3BYQ9	PTS system, IIB component OS=Streptococcus pyogenes serotype M49 (strain NZ131) OX=471876 GN=Spy49_0834 PE=4 SV=1	NVGRFDKSDPASKVK	S	112	M	yes	1549.99	593.853	1076.18	5758.5	1015.62	709.355	2396.97	1067.02	1200.88	2113.39	65.4	79.4	42.2	173.5	41.6	45.1	128.8	51.3	160.3	215.9
1928	2	A0A0H3BWJ5	Transcription termination/antitermination protein NusG OS=Streptococcus pyogenes serotype M49 (strain NZ131) OX=471876 GN=nusG PE=3 SV=1	NVTGFVGSHGNRSKP	S	100	M P	yes	1625.91	1672.13	969.001	9726.08	1491.11	1366.61	6137.39	1954.4	2167.28	4743.42	190.3	234.4	134.3	1329.7	169.6	110.2	427.5	226.9	276	645.4
245	2	A0A0H3BZ18	Cell-division initiation protein OS=Streptococcus pyogenes serotype M49 (strain NZ131) OX=471876 GN=divIVA PE=4 SV=1	PEVNLSETQTFKLNI	T	245	M P	yes	16072.7	36352.4	17039.9	1975	288900	8036.9	40168.4	30703.1	800.799	46.8083	686.6	1647.5	745.5	93	12270.3	261.8	1746.4	1328.5	35.7	2.3
8372	1	A0A0H3C281	50S ribosomal protein L13 OS=Streptococcus pyogenes serotype M49 (strain NZ131) OX=471876 GN=rplM PE=3 SV=1	PGGLKSITAGELRSK	T	90	M	yes	12.7362	249.904	12.2117	35.7445	12.2098	17.8553	71.4842	12.2812	31.3797	1864.11	0.2	3.8	0.2	0.6	0.2	0.3	1.5	0.2	0.5	27
234	3	A0A0H3C1H3	Fructose-bisphosphate aldolase class II OS=Streptococcus pyogenes serotype M49 (strain NZ131) OX=471876 GN=fba PE=4 SV=1	PIVLHGGSGIPDDQI	S	211	M P L	yes	491.52	3984.68	2217.89	5454.99	14612.6	7335.22	163550	2847.01	2789.25	7458.81	4.4	36.9	23	58.6	128.8	50.6	1216.8	24	25.3	63.8
630	2	A0A0H3BY55	Non-specific serine/threonine protein kinase OS=Streptococcus pyogenes serotype M49 (strain NZ131) OX=471876 GN=Spy49_1257c PE=4 SV=1	PKVASGPTASVKLSP	T	302	M P L	yes	9560.42	3464.48	6940.13	3407.03	5270.87	3328.62	4545.05	3569.06	3413.48	9704.95	1592	454.7	886.1	445.8	869.5	593.4	782.4	527.2	498	1374.9
4032	2	B5XJ99	30S ribosomal protein S4 OS=Streptococcus pyogenes serotype M49 (strain NZ131) OX=471876 GN=rpsD PE=3 SV=1	PNNRSKLSEYGLQLA	S	45	M P	yes	1442.03	675.186	439.465	678.19	889.918	428.271	1744.38	663.173	795.312	14021.4	24.5	12.5	9.1	15	17.1	7.3	28.7	12.3	15.1	284.3
18	2	A0A0H3BY55	Non-specific serine/threonine protein kinase OS=Streptococcus pyogenes serotype M49 (strain NZ131) OX=471876 GN=Spy49_1257c PE=4 SV=1	PPTPTVLTQESRLDQ	T	316	M P	yes	329082	143769	284654	139581	321126	214596	91685.8	281283	229519	135761	54798.7	18869.1	36344	18263.8	52974	38256.5	15783.1	41549.5	33485	19233.3
7771	1	A0A0H3BYR4	Putative cytoplasmic membrane protein OS=Streptococcus pyogenes serotype M49 (strain NZ131) OX=471876 GN=lemA PE=3 SV=1	PQETMAASNELSKQV	S	91	P	yes	68.9159	52.6921	248.416	1713.93	166.401	77.6671	988.055	192.813	479.404	1640.41	13.8	6.4	36.3	220	24.3	13.9	238.6	28	69.9	194.9
2955	1	A0A0H3BZ23	Cell division protein FtsZ OS=Streptococcus pyogenes serotype M49 (strain NZ131) OX=471876 GN=ftsZ PE=3 SV=1	PSAQKVISNHNQNQG	S	383	P	yes	983.474	753.708	1138	3689.29	1447.89	1056.86	6419.63	1287.47	1606.35	5419.09	21.7	16.4	24.9	81.3	33.6	21.6	124.5	29	35.5	112.8
840	2	A0A0H3BYW2	EIICB-Lac OS=Streptococcus pyogenes serotype M49 (strain NZ131) OX=471876 GN=lacE PE=4 SV=1	PVTAAAGSYGAHREI	S	499	M P L	yes	5930.76	2242.93	2783.5	17029.7	5608.23	2994.82	8983.44	4721.63	3922.53	7788.63	276.4	536.9	193.5	1114.4	288.5	250.1	677.6	292.8	844.2	1389.1
935	2	B5XKP7	ATP synthase subunit b OS=Streptococcus pyogenes serotype M49 (strain NZ131) OX=471876 GN=atpF PE=3 SV=1	QAEQSRLSAQQLEAK	S	58	P L	yes	3772.72	1403.2	2691.17	15304.4	3869.93	2455.58	3290.48	3620.7	5660.41	18946.4	402.1	166.5	308.2	1708.3	444.4	305.9	446.9	388.6	631.4	2029.4
1362	1	A0A0H3BXH0	Endolytic murein transglycosylase OS=Streptococcus pyogenes serotype M49 (strain NZ131) OX=471876 GN=mltG PE=3 SV=1	QANELQETASKESQV	T	122	M P	yes	4950.92	1173.95	4360.63	1588.7	4309.46	2032.95	1401.51	1863.34	1236.19	6255.07	742.4	179	603.9	138.3	711.2	310.1	224	299.1	190.8	958.3
985	2	A0A0H3BZ23	Cell division protein FtsZ OS=Streptococcus pyogenes serotype M49 (strain NZ131) OX=471876 GN=ftsZ PE=3 SV=1	QEKAEQVSGFRQPRT	S	325	M L	yes	1654.23	1066.22	1595.03	4583.25	1603.02	1810.36	6976.51	1687.03	3909.54	8488.95	36.5	23.2	34.9	101	37.2	37	135.3	38	86.4	176.7
3	5	A0A0H3BY55	Non-specific serine/threonine protein kinase OS=Streptococcus pyogenes serotype M49 (strain NZ131) OX=471876 GN=Spy49_1257c PE=4 SV=1	QESRLDQTNQTDALQ	T	324	M P L	yes	1.97001e+06	880634	1.72753e+06	1.04818e+06	1.8646e+06	1.18654e+06	988494	1.49197e+06	865859	778821	328046	115580	220568	137151	307590	211527	170163	220385	126322	110335
12461	1	A0A0H3BZC7	EIIAB-Man OS=Streptococcus pyogenes serotype M49 (strain NZ131) OX=471876 GN=manL PE=4 SV=1	QGAIPAGTVIGDGKL	T	161	P	yes	222.928	907.12	88.2143	55.8812	85.8495	197.155	1344.3	89.6044	82.4739	438.243	4.7	25.3	2.1	1.6	1.9	2.7	16.9	2	2.2	12.4
5976	1	B5XJ51	50S ribosomal protein L6 OS=Streptococcus pyogenes serotype M49 (strain NZ131) OX=471876 GN=rplF PE=3 SV=1	QGTKLVLSVGKSHQD	S	106	M	yes	100.217	650.013	67.1621	169.488	100.5	319.872	2708.99	91.3347	175.869	829.931	1.2	8.3	1	3	1.4	3.9	32.8	1.1	2.4	13.3
1320	2	A0A0H3BYM9	Glyceraldehyde-3-phosphate dehydrogenase OS=Streptococcus pyogenes serotype M49 (strain NZ131) OX=471876 GN=plr PE=3 SV=1	QLVRTLEYFAKIAK-	Y	330	M	yes	749.507	714.075	582.798	4545.34	779.343	679.485	2729.14	809.572	1911.72	8722.29	2.8	2.7	2.3	18.8	3.3	2.6	10.4	3.1	6.8	29
6219	2	B5XKI2	Triosephosphate isomerase OS=Streptococcus pyogenes serotype M49 (strain NZ131) OX=471876 GN=tpiA PE=3 SV=1	QNCYFENTGAFTGET	T	72	P	yes	688.518	273.562	345.981	657.927	604.375	807.428	5251.54	506.004	778.782	1507.88	8.9	2.6	4	9.5	7.8	9.8	58.9	5.3	6.7	12.6
590	1	B5XI23	Protein translocase subunit SecA OS=Streptococcus pyogenes serotype M49 (strain NZ131) OX=471876 GN=secA PE=3 SV=1	QNIQSQQSANTDDLP	S	806	M P	yes	20274.2	6480.58	13813.2	21157.8	22941.5	19314.3	25505.9	18178.5	20006.3	28546.4	1560.2	508.1	1012.8	1442.7	1811.8	1248.7	1730.6	1348.6	1566.6	2030.1
782	1	B5XMJ7	Cell cycle protein GpsB OS=Streptococcus pyogenes serotype M49 (strain NZ131) OX=471876 GN=gpsB PE=3 SV=1	QPTRVAQSATNFDIL	S	84	M P	yes	6682.74	2334.6	4818.83	12531.5	6215.86	3677.45	2095.25	5688.58	6246.57	9016.89	1037.4	285.3	760.9	2614.9	991.3	579	571.7	869.7	891.3	1753.4
2031	1	A0A0H3BZC9	Uridylate kinase OS=Streptococcus pyogenes serotype M49 (strain NZ131) OX=471876 GN=pyrH PE=3 SV=1	QRILIKLSGEALAGE	S	13	M	yes	226.388	140.32	189.552	997.106	236.801	848.234	9888.86	249.129	404.72	1098.35	51	30	36.6	195	45	132.1	1544.8	53.3	87.2	219.6
95	2	B5XI23	Protein translocase subunit SecA OS=Streptococcus pyogenes serotype M49 (strain NZ131) OX=471876 GN=secA PE=3 SV=1	QSQQSANTDDLPKVE	T	809	M P L	yes	79897.3	27586.8	48516.8	11446.4	82977.1	66267.5	22117.6	66353.1	32454.9	15822.1	6148.5	2162.9	3557.3	780.5	6553.1	4284.3	1500.7	4922.5	2541.4	1125.2
2926	1	B5XJ99	30S ribosomal protein S4 OS=Streptococcus pyogenes serotype M49 (strain NZ131) OX=471876 GN=rpsD PE=3 SV=1	QSRRLGLSLTGTGKE	S	18	M	yes	523.838	243.067	212.489	339.095	499.603	510.405	2759.4	334.282	916.452	10618.4	8.9	4.5	4.4	7.5	9.6	8.7	45.4	6.2	17.4	215.3
1572	1	A0A0H3C0J7	Phosphocarrier protein HPr OS=Streptococcus pyogenes serotype M49 (strain NZ131) OX=471876 GN=ptsH PE=3 SV=1	QTASKFASDITLDYK	S	31	M P	yes	3245.24	1852.8	2289.16	1848.46	2976.09	2615.56	2459.38	2950.26	3333.51	2359.08	1658.7	1209.7	1519.7	1281	1626.6	1054.7	998	1571	1946.3	1716.4
1337	2	A0A0H3BZ03	R3H domain protein OS=Streptococcus pyogenes serotype M49 (strain NZ131) OX=471876 GN=Spy49_0209 PE=4 SV=1	QVDIEGISDKTVYKA	S	55	M P L	yes	3026.93	3282.17	2654.54	9436.27	2725.38	3020.06	5026.46	3107.51	4177.64	12283.6	115.7	116	102.6	525.1	113.1	111.4	203.7	119.5	154.7	495
941	2	B5XK64	Ribosome-recycling factor OS=Streptococcus pyogenes serotype M49 (strain NZ131) OX=471876 GN=frr PE=3 SV=1	RAGRANASLLDRIQV	S	35	M L	yes	1359.59	1089.84	1004.95	6576.51	1345.02	1704.12	8334.03	1290.29	2522.7	9358.82	51.5	39.9	44.4	303.2	50.7	53.7	222.3	48.9	98	360.6
578	2	B5XJR0	30S ribosomal protein S7 OS=Streptococcus pyogenes serotype M49 (strain NZ131) OX=471876 GN=rpsG PE=3 SV=1	RARRVGGSNYQVPVE	S	83	M P L	yes	3506.77	2465.69	2682.9	9624.5	3585.14	4046.92	23404.4	3776.63	7873.63	32428.7	48.1	35	42.2	161.2	52.2	52.9	324.5	53.6	115.2	504.4
4271	1	B5XJ52	50S ribosomal protein L18 OS=Streptococcus pyogenes serotype M49 (strain NZ131) OX=471876 GN=rplR PE=3 SV=1	RAVAKGISEVVFDRG	S	89	M	yes	263.811	249.713	208.508	1712.77	253.097	251.267	2123.08	313.874	702.06	3047.67	13.5	11.9	12.1	107.1	14.4	14.1	102.3	16	33.8	176.8
418	2	B5XK64	Ribosome-recycling factor OS=Streptococcus pyogenes serotype M49 (strain NZ131) OX=471876 GN=frr PE=3 SV=1	RFAQSHQSLSREYAS	S	19	M P L	yes	3173.27	2616.71	2206.81	16196.2	2782.9	3274.96	18287.6	2844.45	5727.55	22813.1	120.2	95.8	97.5	746.7	104.9	103.2	487.8	107.8	222.5	879
3298	3	A0A0H3BZ61	F420_ligase domain-containing protein OS=Streptococcus pyogenes serotype M49 (strain NZ131) OX=471876 GN=Spy49_0453 PE=4 SV=1	RKTEVIDSQGETIKF	S	189	P	yes	636.515	279.957	575.894	148.714	420.046	2266.38	11454.9	259.84	138.024	135.7	4801.3	1700.3	4126.5	986.6	2893.1	216.4	1999.1	1461.2	923.9	820.4
2846	2	A0A0H3BWE7	Alcohol dehydrogenase OS=Streptococcus pyogenes serotype M49 (strain NZ131) OX=471876 GN=adhP PE=3 SV=1	RKVLDFIS-------	S	338	M	yes	1118.32	630.433	915.777	4573.88	964.222	809.923	890.466	1022.16	760.2	865.293	49.3	103.2	37.6	82.7	41.3	60.7	75.3	47.7	103.3	76.3
8835	1	A0A0H3C281	50S ribosomal protein L13 OS=Streptococcus pyogenes serotype M49 (strain NZ131) OX=471876 GN=rplM PE=3 SV=1	RLSAVVASVLRGKNK	S	36	M	yes	25.4723	480.078	12.2117	5.95741	18.3146	5.95175	28.5937	6.1406	18.8278	2865.2	0.4	7.3	0.2	0.1	0.3	0.1	0.6	0.1	0.3	41.5
6011	2	B5XLC6	Elongation factor 4 OS=Streptococcus pyogenes serotype M49 (strain NZ131) OX=471876 GN=lepA PE=3 SV=1	RRRGDFVTMDYIDDN	T	440	M	yes	93.4674	131.648	177.987	3941.44	183.317	124.094	753.505	380.537	1084.68	4084.64	15	21.9	27.5	704.1	30.5	21.2	211	63.7	171.6	544.8
23782	1	A0A0H3BZJ0	Formate acetyltransferase OS=Streptococcus pyogenes serotype M49 (strain NZ131) OX=471876 GN=pfl PE=3 SV=1	RVFHEVLSMDDAAEA	S	764	M	yes	5.60891	1.66428	10.6367	871.394	120.216	0	204.116	44.4652	1.82951	5.19239	0.1	0.1	0.2	14.6	2.6	0	14.8	1.1	0.1	0.2
6989	1	B5XIK9	30S ribosomal protein S15 OS=Streptococcus pyogenes serotype M49 (strain NZ131) OX=471876 GN=rpsO PE=3 SV=1	RYRELIQSLGLRR--	S	84	M	yes	77.3135	327.09	31.2312	460.536	81.0566	92.1082	657.687	90.2641	198.26	2297.89	2.4	10	1.1	18.4	2.8	2.7	20.9	2.8	6.2	77.1
1596	1	A0A0H3C114	Inosine-5'-monophosphate dehydrogenase OS=Streptococcus pyogenes serotype M49 (strain NZ131) OX=471876 GN=guaB PE=3 SV=1	SDRYFQGSVNEANKL	S	411	M P L	yes	1236.48	723.498	880.522	4769.62	1082.85	1003.19	6550.43	1115.39	2277.64	7335.96	26.1	16.7	20	112.1	25.7	27	156.6	25.7	49.9	151.5
783	1	A0A0H3BZR7	Mid-cell-anchored protein Z OS=Streptococcus pyogenes serotype M49 (strain NZ131) OX=471876 GN=mapZ PE=3 SV=1	SEIKAGVTKDDSILD	T	42	M P	yes	6764.59	2722.12	6636.27	1813.71	7905.78	4218.31	1459.33	6670.23	4857.25	2347.26	637.9	268.6	666	206.9	859.4	372.8	120.9	694.5	476.4	256.8
134	2	A0A0H3C124	Putative mannose-specific phosphotransferase system component IID OS=Streptococcus pyogenes serotype M49 (strain NZ131) OX=471876 GN=manN PE=4 SV=1	SEITKDMSGGILQDI	S	174	M P L	yes	26343.2	20385.6	18462.7	111354	22174.1	23506.1	92839.1	28667	51453.8	159472	932.9	938.5	665.2	3910.8	806	539	2095.7	1033.6	2090.4	6167.8
8628	1	A0A0H3BWG0	DNA-directed RNA polymerase subunit beta' OS=Streptococcus pyogenes serotype M49 (strain NZ131) OX=471876 GN=rpoC PE=3 SV=1	SGARGNISNFSQLAG	S	731	M P	yes	36.6045	801.885	9.39513	58.1941	59.8228	198.015	3699.72	46.5636	53.9667	95.8025	1.9	43.6	0.5	3.1	3.2	7.7	155	2.6	3	5.3
785	1	B5XJR1	Elongation factor G OS=Streptococcus pyogenes serotype M49 (strain NZ131) OX=471876 GN=fusA PE=3 SV=1	SGVLNSGSYVMNTSK	S	338	M P L	yes	2171.02	3641.72	2346.76	3947.63	3625.27	3670.13	29987.5	4565.37	3791.37	9591.72	25.3	41.1	27.7	47.9	41.1	33.7	292.2	50.6	42.5	101.3
2356	1	B5XKI1	Elongation factor Tu OS=Streptococcus pyogenes serotype M49 (strain NZ131) OX=471876 GN=tuf PE=3 SV=1	SIREGGRTVGSGIVS	T	387	M	yes	1081.09	683.459	859.16	8574.76	1442.46	1169.92	6390.87	1206.79	2473.28	14474.8	4.5	2.7	3.6	32.8	6.2	4.9	26.9	4.9	9.3	50.5
2838	1	A0A0H3BYQ9	PTS system, IIB component OS=Streptococcus pyogenes serotype M49 (strain NZ131) OX=471876 GN=Spy49_0834 PE=4 SV=1	SNTKVHLSQLVN---	S	159	M	yes	1004.89	367.231	716.604	3269.24	1101.07	619.702	2592.37	846.543	550.623	941.675	42.4	49.1	28.1	98.5	45.1	39.4	139.3	40.7	73.5	96.2
1310	2	B5XIW7	60 kDa chaperonin OS=Streptococcus pyogenes serotype M49 (strain NZ131) OX=471876 GN=groL PE=3 SV=1	SQLETTTSDFDREKL	S	356	P	yes	1085.35	1527.69	1316.28	6514.44	1040.79	1259.53	11685.2	1464.41	3743.16	15088.7	8.3	8.5	10.9	53.8	10.2	14.7	109.2	10.1	21.3	87.7
1070	2	B5XJX2	UPF0154 protein Spy49_0296 OS=Streptococcus pyogenes serotype M49 (strain NZ131) OX=471876 GN=Spy49_0296 PE=3 SV=1	SQMGQKPSEAKIQQT	S	56	M	yes	1439.47	1294.54	2059.5	21296	2772	1229.98	5211.24	2507.12	2850.84	12219.5	467.8	470.3	711.5	8436.8	922.5	307.1	1344.1	898.5	1040	4208.4
4493	3	B5XKM2	50S ribosomal protein L19 OS=Streptococcus pyogenes serotype M49 (strain NZ131) OX=471876 GN=rplS PE=3 SV=1	SRKGQGISEMYTVRK	S	56	M P L	yes	304.389	501.52	144.546	364.4	267.96	189.785	364.138	165.622	222.995	17614.2	5.2	9	2.7	7	4.7	3.2	5.7	2.9	4.1	428.7
6730	1	A0A0H3BXP9	Putative rhamnosyltransferase OS=Streptococcus pyogenes serotype M49 (strain NZ131) OX=471876 GN=rgpAc PE=4 SV=1	SRLTTADSKVRAYFQ	S	196	M	yes	112.467	64.5761	67.8088	864.871	78.4459	98.7256	376.437	99.7241	255.277	976.09	79.8	48.2	51.5	636.8	63.6	73.5	229	76.3	189.8	674.8
604	2	A0A0H3BXI0	Uncharacterized protein OS=Streptococcus pyogenes serotype M49 (strain NZ131) OX=471876 GN=Spy49_1001c PE=3 SV=1	SSTSQFVSEQTEKLK	S	141	M P L	yes	2916.66	1826.05	3224.54	21584.5	3580.57	4302.21	18561.9	3399.01	9073.51	24279.3	58.9	24.4	54.9	320.5	53.6	76.3	255	49.6	126.4	383.8
2652	1	B5XKI1	Elongation factor Tu OS=Streptococcus pyogenes serotype M49 (strain NZ131) OX=471876 GN=tuf PE=3 SV=1	SVNQPKDYASIDAAP	Y	50	M P	yes	2042.06	1544.11	1527.4	2614.26	1721.64	1719.07	3539.93	1896.39	3377.49	4901.36	8.5	6.1	6.4	10	7.4	7.2	14.9	7.7	12.7	17.1
494	4	B5XLJ8	L-lactate dehydrogenase OS=Streptococcus pyogenes serotype M49 (strain NZ131) OX=471876 GN=ldh PE=3 SV=1	SVRDAAYSIINKKGA	S	225	M L	yes	8278.01	6139.38	5780.61	27661.6	8012.36	8644.99	14701.4	7025	12630.3	46617.8	127	98.5	94.9	462.2	121.6	137.2	256.4	103.3	179.6	636.2
5071	1	B5XMM9	Glycine--tRNA ligase beta subunit OS=Streptococcus pyogenes serotype M49 (strain NZ131) OX=471876 GN=glyS PE=3 SV=1	SYEADLRSQFVIADA	S	208	M	yes	285.218	256.854	193.699	2315.55	336.054	355.111	532.908	297.461	634.256	1725.29	48.7	51.2	35.8	439.7	59.2	50.1	69.6	52.4	125.1	335.9
2223	2	B5XI32	Elongation factor P OS=Streptococcus pyogenes serotype M49 (strain NZ131) OX=471876 GN=efp PE=3 SV=1	TAEGTYVSRA-----	S	183	M P	yes	427.451	926.04	542.144	5830.01	930.995	592.537	7126.28	793.96	1216.38	5347.54	17	33.8	20.7	222.9	32.8	18.8	209.4	29.5	44.4	186
5278	1	B5XJ63	50S ribosomal protein L17 OS=Streptococcus pyogenes serotype M49 (strain NZ131) OX=471876 GN=rplQ PE=3 SV=1	TALQKLFSEIAPRYA	S	93	M	yes	170.425	102.576	117.178	638.769	225.849	214.568	930.398	189.526	336.355	2266.39	2.9	1.7	2.1	12.3	3.9	3.6	17.7	3.1	6	42.6
1138	2	A0A0H3BZL9	PTS system_ fructose-specific IIABC component OS=Streptococcus pyogenes serotype M49 (strain NZ131) OX=471876 GN=fruA PE=4 SV=1	TAVSTEKTSLGGAFY	T	283	P L	yes	5247.92	2656.1	3003.46	4836.46	4947.29	4776.09	5606.99	3681.21	3256.43	10219.5	106	90.7	80.1	164.4	110.2	86.1	87.6	97.1	104.5	296
511	2	A0A0H3BZ76	Putative phosphoprotein phosphatase (PppL protein) OS=Streptococcus pyogenes serotype M49 (strain NZ131) OX=471876 GN=pppL PE=4 SV=1	TDIGQKRSNNQDFIN	S	14	M L	yes	2925.33	2852.96	2604.18	14829.6	3089.52	3401.09	21776.4	2843.04	5713.62	11478.7	231.8	178.7	203.2	1518.4	254.5	254.9	1310.6	217.2	379	775.3
643	1	B5XHZ0	Chaperone protein DnaK OS=Streptococcus pyogenes serotype M49 (strain NZ131) OX=471876 GN=dnaK PE=3 SV=1	TERDAAQSALDELKA	S	537	M P	yes	2383.7	2425.33	1840.27	14677.9	2222.87	1773.48	10348.9	2559.9	6085.97	18335	23.1	14.1	16.2	133.8	23.2	16.9	81.9	18.3	38.5	125.4
585	2	A0A0H3BXI0	Uncharacterized protein OS=Streptococcus pyogenes serotype M49 (strain NZ131) OX=471876 GN=Spy49_1001c PE=3 SV=1	TISDTVNSDEAAK--	S	157	M P L	yes	3971.41	4273.25	4017.45	17153.1	5724.9	5971.22	21175.1	4707.9	7171.23	16435	80.2	57.1	68.4	254.7	85.7	105.9	290.9	68.7	99.9	259.8
192	1	B5XMJ7	Cell cycle protein GpsB OS=Streptococcus pyogenes serotype M49 (strain NZ131) OX=471876 GN=gpsB PE=3 SV=1	TRVAQSATNFDILKR	T	86	M P L	yes	28242.2	10110	18139.8	6810.41	26754	16546.6	3364.05	23499.3	16729	6113.42	4384.2	1235.5	2864.3	1421.1	4266.7	2605.2	917.9	3592.7	2387	1188.8
1799	3	B5XKR6	30S ribosomal protein S21 OS=Streptococcus pyogenes serotype M49 (strain NZ131) OX=471876 GN=rpsU PE=3 SV=1	TVVRKNESLDDALRR	S	11	M L	yes	1654.14	2268.94	1077.97	3734.07	1440.23	1409.42	9875.18	1261.78	2028.39	13688.7	411.4	620.8	333.2	1254.2	363.9	337.4	2391.6	347.5	604.8	6349.5
5231	2	A0A0H3BVE1	30S ribosomal protein S5 OS=Streptococcus pyogenes serotype M49 (strain NZ131) OX=471876 GN=rpsE PE=3 SV=1	VAALRGISVSDLA--	S	159	M	yes	349.2	227.74	216.017	2396.15	328.649	461.762	3163.83	346.487	1050.75	3217.76	4.3	2.8	3.1	37.9	4.5	5.6	38.8	4.1	12.7	40.5
2335	1	A0A0H3BVE1	30S ribosomal protein S5 OS=Streptococcus pyogenes serotype M49 (strain NZ131) OX=471876 GN=rpsE PE=3 SV=1	VADITSKSLGSNTPI	S	126	M P L	yes	341.079	276.541	181.175	278.18	138.763	173.161	1035.58	118.313	835.632	12362.5	4.2	3.4	2.6	4.4	1.9	2.1	12.7	1.4	10.1	155.6
862	2	A0A0H3BZ23	Cell division protein FtsZ OS=Streptococcus pyogenes serotype M49 (strain NZ131) OX=471876 GN=ftsZ PE=3 SV=1	VAGAQYASDQAKQSV	S	348	M P L	yes	3050.13	1553.37	2321.71	12315.8	2917.32	4061.07	15412.3	2841.31	5004.57	16617.6	67.3	33.8	50.8	271.4	67.7	83	298.9	64	110.6	345.9
2086	1	A0A0H3C1H3	Fructose-bisphosphate aldolase class II OS=Streptococcus pyogenes serotype M49 (strain NZ131) OX=471876 GN=fba PE=4 SV=1	VAKVNVNTESQIAFS	T	233	M P	yes	1887.88	1447.01	1292.16	1675.59	2064.82	2942.79	14045.8	1577.72	1620.63	3156.55	16.9	13.4	13.4	18	18.2	20.3	104.5	13.3	14.7	27
2391	1	B5XJ99	30S ribosomal protein S4 OS=Streptococcus pyogenes serotype M49 (strain NZ131) OX=471876 GN=rpsD PE=3 SV=1	VDPGQVISVREKSMK	S	141	M	yes	276.633	3305.71	135.22	596.807	234.189	222.936	1811.23	134.791	205.412	9232.54	4.7	61.2	2.8	13.2	4.5	3.8	29.8	2.5	3.9	187.2
1188	2	A0A0H3BYC1	DNA-directed RNA polymerase subunit alpha OS=Streptococcus pyogenes serotype M49 (strain NZ131) OX=471876 GN=rpoA PE=3 SV=1	VEPARVGSNDGFDKL	S	185	M P L	yes	1208.78	393.796	993.409	7391.81	1045.87	1212	6678.67	1216.88	2759.12	9186.98	32.7	11.5	27.9	206.4	28.9	26.8	127.4	33.7	80.1	268.9
1414	2	A0A0H3BWJ5	Transcription termination/antitermination protein NusG OS=Streptococcus pyogenes serotype M49 (strain NZ131) OX=471876 GN=nusG PE=3 SV=1	VGSHGNRSKPTPLLE	S	105	M P	yes	1349.94	2924.09	1062.08	5809.17	1609.81	2337.62	35497.8	1449.65	1695.34	3089.03	158	409.9	147.2	794.2	183.1	188.5	2472.6	168.3	215.9	420.3
735	2	A0A0H3C2S7	Uncharacterized protein OS=Streptococcus pyogenes serotype M49 (strain NZ131) OX=471876 GN=Spy49_1801c PE=4 SV=1	VKTVGLDSKSPLKTI	S	137	M P L	yes	5831.93	6201.71	3141.61	2609.21	6460.63	5319.43	3520.59	5661.77	5534.42	5126.31	1358.6	1646.8	1042.8	1188	1452	1096.2	886.5	1271.2	1556.8	1761.3
10122	1	A0A0H3BZJ8	Cell division protein FtsA OS=Streptococcus pyogenes serotype M49 (strain NZ131) OX=471876 GN=ftsA PE=3 SV=1	VKVDVVGSEEPVEVT	S	280	P	yes	83.0426	11.3237	59.5518	822.022	83.2614	242.131	929.735	75.509	164.375	798.937	5.2	0.8	3.7	51	5.1	11.9	55.1	5	12.1	57.2
10632	1	B5XIW7	60 kDa chaperonin OS=Streptococcus pyogenes serotype M49 (strain NZ131) OX=471876 GN=groL PE=3 SV=1	VLNKIRGTFSVVAVK	T	268	M	yes	65.3823	71.8915	72.4556	460.128	71.4271	17.1365	96.3068	86.9949	228.456	1290.37	0.5	0.4	0.6	3.8	0.7	0.2	0.9	0.6	1.3	7.5
7333	1	A0A0H3BY55	Non-specific serine/threonine protein kinase OS=Streptococcus pyogenes serotype M49 (strain NZ131) OX=471876 GN=Spy49_1257c PE=4 SV=1	VLRTNYQTDQVAVAR	T	50	M	yes	663.585	535.635	550.605	958.372	906.869	1088.79	989.292	573.405	813.614	1015.74	110.5	70.3	70.3	125.4	149.6	194.1	170.3	84.7	118.7	143.9
11555	1	B5XJ35	30S ribosomal protein S10 OS=Streptococcus pyogenes serotype M49 (strain NZ131) OX=471876 GN=rpsJ PE=3 SV=1	VPLPTERSLYTIIRA	S	47	M	yes	6.96304	26.515	0	10.9733	0	0	374.057	0	6.5465	1018.51	0.1	0.4	0	0.2	0	0	5.2	0	0.1	16.4
255	2	B5XKI2	Triosephosphate isomerase OS=Streptococcus pyogenes serotype M49 (strain NZ131) OX=471876 GN=tpiA PE=3 SV=1	VRVQYGGSVKPENVK	S	214	M P L	yes	6250.81	5418.63	4688.04	13435.6	5974.01	19905.6	107447	6062.5	8892.06	27740.2	80.8	51.5	54.2	194	77.1	241.6	1205.1	63.5	76.5	231.8
1225	4	A0A0H3BZ43	Uncharacterized protein OS=Streptococcus pyogenes serotype M49 (strain NZ131) OX=471876 GN=Spy49_1003c PE=3 SV=1	VSLQDKVSDMARSTF	S	141	M P L	yes	4947.14	7346.05	4225.49	19339.1	5521.97	5579.04	21266.1	5149.52	8048.49	22861.2	117.2	136.4	95.7	365.3	111.6	130.6	381.4	106.6	153.4	459.2
2204	2	A0A0H3BYM9	Glyceraldehyde-3-phosphate dehydrogenase OS=Streptococcus pyogenes serotype M49 (strain NZ131) OX=471876 GN=plr PE=3 SV=1	VTLDKNVSVDEINAA	S	255	M P	yes	1525.78	793.416	1089.58	6672.94	991.891	1358.97	9342.05	1122.96	2642.67	9865.22	5.7	3	4.3	27.6	4.2	5.2	35.6	4.3	9.4	32.8
5487	2	A0A0H3BY45	Ribosome hibernation promoting factor OS=Streptococcus pyogenes serotype M49 (strain NZ131) OX=471876 GN=hpf PE=3 SV=1	VVRTKNVTLKPMDVE	T	134	P	yes	131.335	186.036	135.504	1169.45	397.367	358.241	3729.5	259.389	309.381	1989.16	2.4	3.3	2.6	21.4	7.6	6.9	72.3	4.7	5.8	38.8
414	3	A0A0H3BZL9	PTS system_ fructose-specific IIABC component OS=Streptococcus pyogenes serotype M49 (strain NZ131) OX=471876 GN=fruA PE=4 SV=1	YHAKNGKSETAVSTE	S	274	M P L	yes	7411.45	2550.68	4912.03	12082.3	5818.22	5597.07	13742.3	4428.06	8426.2	26398.1	149.7	87.1	131	410.7	129.6	100.9	214.7	116.8	270.4	764.6
13943	1	A0A0H3C052	NADH oxidase OS=Streptococcus pyogenes serotype M49 (strain NZ131) OX=471876 GN=nox1 PE=4 SV=1	YMESPVQSIDYDAKT	S	83	P	yes	18.774	103.636	27.9529	1201.93	41.4797	55.348	572.926	43.7978	130.23	924.745	0.5	2.3	0.5	20.4	1	1.5	15.7	1	2.8	19.8
61	2	A0A0H3BZP2	Arsenate reductase OS=Streptococcus pyogenes serotype M49 (strain NZ131) OX=471876 GN=arsC PE=3 SV=1	YMKEDGESVNPIEVK	S	131	M L	yes	14370.3	15898.2	13547.3	15206.7	36627.1	127328	220936	17844.1	13930.1	10712.7	40945.6	62443.7	35084.5	26709	78877.4	160781	585426	53918.1	65957.6	36984.6
1613	2	A0A0H3BXB3	Uncharacterized protein OS=Streptococcus pyogenes serotype M49 (strain NZ131) OX=471876 GN=Spy49_0911c PE=4 SV=1	YVKHGYVTKPIKKKY	T	56	M L	yes	1442.11	1807.58	2727.5	3876.56	1074.72	1089.49	1806.65	2511.58	8451.74	7928.13	129.4	67.3	158	254.9	115.6	143.7	193.9	170.9	435.5	480.4
9846	1	B5XJ63	50S ribosomal protein L17 OS=Streptococcus pyogenes serotype M49 (strain NZ131) OX=471876 GN=rplQ PE=3 SV=1	YVRNEIASENYDEAA	S	72	P	yes	47.0138	6.03389	16.7397	145.411	17.373	101.324	1046.04	12.2275	106.512	2378.11	0.8	0.1	0.3	2.8	0.3	1.7	19.9	0.2	1.9	44.7
2506	1	B5XI03	GTP-sensing transcriptional pleiotropic repressor CodY OS=Streptococcus pyogenes serotype M49 (strain NZ131) OX=471876 GN=codY PE=3 SV=1	EKTRKITSILQRSVD	S	13	M L	no	115.13	366.788	55.6801	460.684	156.906	819.539	7799.76	128.089	191.191	525.628	18.8	71.9	10.2	86	18.5	67.5	629.1	22.2	37.3	91.4
758	2	B5XI32	Elongation factor P OS=Streptococcus pyogenes serotype M49 (strain NZ131) OX=471876 GN=efp PE=3 SV=1	LRDVRTGSTFDTTYR	S	48	M P L	no	4415.32	4380.88	9910.5	24358.4	3664.37	4844.3	21242.7	4505.38	9416.02	29425.8	175.6	159.9	378.4	931.3	129.1	153.7	624.2	167.4	343.7	1023.5
1662	2	A0A0H3BZC1	Uncharacterized protein OS=Streptococcus pyogenes serotype M49 (strain NZ131) OX=471876 GN=Spy49_0377 PE=4 SV=1	-MGRPLLTDDIIEKA	T	7	M	no	8959.86	6417.01	7250.38	1088.04	9071.42	4167.44	3741.97	8645.35	4128.05	2847.15	5833.6	4983.2	4375.7	1030.8	6309.3	3524.1	10841.2	5762.9	2750.6	2463.7
1792	2	A0A0H3BXH0	Endolytic murein transglycosylase OS=Streptococcus pyogenes serotype M49 (strain NZ131) OX=471876 GN=mltG PE=3 SV=1	NELQETASKESQVPL	S	124	M P L	no	3750.54	2143.28	3367.77	1928.72	3258.76	2511.52	1835.1	3193.4	3904.87	2941.18	562.4	326.8	466.4	167.9	537.8	383.1	293.3	512.6	602.7	450.6
4080	1	B5XJ99	30S ribosomal protein S4 OS=Streptococcus pyogenes serotype M49 (strain NZ131) OX=471876 GN=rpsD PE=3 SV=1	RRLGLSLTGTGKELA	T	20	M L	no	270.748	432.119	120.732	171.808	301.844	240.536	589.563	215.666	495.095	7654.33	4.6	8	2.5	3.8	5.8	4.1	9.7	4	9.4	155.2
1045	2	A0A0H3BYW3	Uncharacterized protein OS=Streptococcus pyogenes serotype M49 (strain NZ131) OX=471876 GN=Spy49_0908 PE=4 SV=1	VEGIGEATSQTIQSK	T	110	M P	no	13859.3	11099.8	7185.84	5176.8	11183	18578.2	19855	7285.61	5043.25	7184.42	1319.4	569.2	408.7	295.8	458.3	1033.9	943.9	353.2	267.1	445.2

## Sheet: Exp 2
									Phosphorylation site abundance													Phosphorylation site abundance normalized to protein abundance
1st feature	No. of features	UniProt Acc. No.	Protein name	15 AS window	Residue	Position	Identified by	Used for quantification	THY 0.8	THY ME	THY exp	THY stat	THY late stat	CDMF ME	CDMF exp	CDMF stat	CDMF late stat	CDM- ME	CDM- exp	CDM- stat	CDM- late stat	THY 0.8	THY ME	THY exp	THY stat	THY late stat	CDMF ME	CDMF exp	CDMF stat	CDMF late stat	CDM- ME	CDM- exp	CDM- stat	CDM- late stat
2004	1	B5XJ02	UPF0297 protein Spy49_1751c OS=Streptococcus pyogenes serotype M49 (strain NZ131) OX=471876 GN=Spy49_1751c PE=3 M	----MGFTDETVRFK; T4T7	T, T	4, 7	M	yes	6318.86	1560.11	4429.12	2882.16	185.309	5427.28	4315.85	6317.38	11257.3	1000.61	626.218	1783.59	747.326	354.2	81.7	277	175	10.9	311	306.8	268.9	675.2	62	40.1	111.5	50.1
1658	1	A0A0H3BZK2	50S ribosomal protein L27 OS=Streptococcus pyogenes serotype M49 (strain NZ131) OX=471876 GN=rpmA PE=3	AADGQTVSGGSILYR	S	43	M P L	yes	445.31	334.36	181.973	1719.8	2547.12	449.909	458.019	2107.4	4936.38	535.678	745.499	18064.4	22481.6	9.3	5.7	3.1	35.4	70.8	9.7	10.5	49.1	172.7	11.9	18.4	718.4	1186.9
2822	2	A0A0H3BWH3	Putative calcium-transporting ATPase OS=Streptococcus pyogenes serotype M49 (strain NZ131) OX=471876 GN=pacL PE=4	AAIEALKSMSSPLAR	S	119	M	yes	607.694	639.667	443.41	11490.1	24800.9	810.263	718.831	2201.22	3258.62	573.516	748.691	4453.18	9499.54	48.3	44.1	32.6	779.1	2090.3	63.7	53.3	132.1	221.5	50.5	70.5	409.1	927.1
831	3	B5XJR0	30S ribosomal protein S7 OS=Streptococcus pyogenes serotype M49 (strain NZ131) OX=471876 GN=rpsG PE=3	AANNTGASVKKREDT	S	134	M P L	yes	241.787	250.038	227.334	4409.85	7132.59	289.903	418.146	5720.88	12372.2	603.096	4011.65	59630.6	65844	1.8	2.2	2	43.3	76.1	2.8	4.3	58	140.8	5.2	37.5	635	740.7
2647	1	B5XI23	Protein translocase subunit SecA OS=Streptococcus pyogenes serotype M49 (strain NZ131) OX=471876 GN=secA PE=3	AAPQNIQSQQSANTD	S	803	P	yes	954.19	713.821	703.174	8462.18	3928.63	1858.97	2113.68	2104.82	1370.26	1863.68	3038.73	5145.99	6027.91	37.2	33.1	32.6	428.9	204.3	91.9	111	108.4	76.5	85.9	144.8	258	321.2
233	1	A0A0H3BYA0	PTS system, IIB component, putative OS=Streptococcus pyogenes serotype M49 (strain NZ131) OX=471876 GN=Spy49_1328c PE=4	ACGAGVNSSHQIKDA	S	14	M L	yes	20350.9	9128.43	9858.73	49793.1	48495.9	17405.3	11461.1	10706	10406.8	23495.5	20242.3	17699.2	15458.8	1636.9	870	560.2	1225.4	1335.9	1506.6	2447.9	2839.6	2635.2	1635.6	1622.2	1813.1	1663.2
2158	2	A0A0H3BZC7	EIIAB-Man OS=Streptococcus pyogenes serotype M49 (strain NZ131) OX=471876 GN=manL PE=4	ADRIIVASDEVAQDD	S	201	M P L	yes	2164.4	644.808	666.65	3714.23	5173.21	1149.79	2108.6	13187.8	15882.6	1700.03	1500.88	4182.53	9105.14	56.1	21.8	16.3	102.9	173.7	35.5	45.4	255.9	324	46.2	41.8	130.2	312.3
260	1	A0A0H3BZ18	Cell-division initiation protein OS=Streptococcus pyogenes serotype M49 (strain NZ131) OX=471876 GN=divIVA PE=4	AEATNLVSKATYDAQ	S	94	M P L	yes	4187.22	6580.22	4227.64	63576.6	65502.5	9017.77	7537.78	27546.8	34687.8	10595.7	13682.6	16330.2	20257.2	115.1	168.8	108.9	1615.6	1629.5	250.1	171.6	697.8	980.6	326.9	419.1	539	687.7
2346	2	A0A0H3BXF8	Putative sugar ABC transporter OS=Streptococcus pyogenes serotype M49 (strain NZ131) OX=471876 GN=Spy49_0973c PE=4	AEMMVGRSVSFTTSK	S	241	M L	yes	951.733	1024.2	726.762	7823.56	10340	1188.67	941.495	2444.88	3053.54	1322.97	1643.81	5187.16	8308.83	126.1	147.9	98.1	743.2	959.4	182.8	117.6	328.6	423.1	181.6	233.1	752.3	1099.6
1578	1	A0A0H3BZQ5	SSU ribosomal protein S1p OS=Streptococcus pyogenes serotype M49 (strain NZ131) OX=471876 GN=rpsA PE=4	AEVFSKISEGAVVTG	S	192	M P	yes	1268.25	822.295	475.1	8611.15	15339.1	928.885	1897.57	3725	4262.19	1126.63	1375.29	4592.71	6444.13	18.1	11.1	6.6	124.4	222.2	14.2	25.2	51.8	64.3	16.6	20.9	71.2	100.6
6947	1	B5XMC3	Arginine deiminase OS=Streptococcus pyogenes serotype M49 (strain NZ131) OX=471876 GN=arcA PE=3	AFIDEYLSEANIRGR	S	94	M P	yes	44.6773	104.812	46.9023	2972.68	7080.19	143.148	264.918	775.7	1323.22	53.8377	49.1821	542.49	1159.06	0.5	1.4	0.5	11.9	29	1.7	6.1	21.7	35	0.6	0.6	6.8	14.4
1711	2	A0A0H3BYL1	Pyruvate kinase OS=Streptococcus pyogenes serotype M49 (strain NZ131) OX=471876 GN=pyk PE=3	AFPRTNKTDVIASAV	T	384	M P L	yes	812.497	576.42	219.381	6675.16	10201	1236.86	1668.33	12063.2	17223.9	1006.81	1212.79	3663.88	6222.48	8.4	6.2	2.2	76	130.9	14.2	15.8	99.8	156.5	11.2	13.2	42.7	72.7
2552	1	B5XKI2	Triosephosphate isomerase OS=Streptococcus pyogenes serotype M49 (strain NZ131) OX=471876 GN=tpiA PE=3	AFVEAVASKLPSTDL	S	29	M P	yes	502.823	244.665	165.555	2339.09	4682.47	640.4	694.363	3558.44	6682.66	669.079	754.932	2888.6	6074.62	4.5	2.1	1.6	27.8	59.1	5.4	5.6	22.3	49.6	6.1	6.6	25.2	59.1
2785	1	A0A0H3BYQ3	30S ribosomal protein S3 OS=Streptococcus pyogenes serotype M49 (strain NZ131) OX=471876 GN=rpsC PE=3	AGAKGIKTQVSGRLN	T	141	M	yes	243.313	252.876	84.9509	793.813	1095	343.884	594.951	2059.28	3745.54	531.254	2392.7	10041.5	11027.2	2.5	2.6	0.9	8.7	12.2	4.1	6.8	22.5	43.3	5.7	25.2	103.4	109.5
3109	2	A0A0H3BXY9	Isoleucine--tRNA ligase OS=Streptococcus pyogenes serotype M49 (strain NZ131) OX=471876 GN=ileS PE=3	AGKFGWESFETLASH	S	266	M L	yes	235.793	249.888	15.364	6722.91	15261.9	51.0907	357.68	1321.04	1071.64	860.151	1004.16	6773.46	12295.6	14.9	19.5	1.1	497.7	1061.2	3.9	22.1	63.4	51.9	57	68.5	449.9	847.6
3210	1	B5XJ35	30S ribosomal protein S10 OS=Streptococcus pyogenes serotype M49 (strain NZ131) OX=471876 GN=rpsJ PE=3	AGPVPLPTERSLYTI	T	44	M P L	yes	53.7607	9.52576	9.5133	784.518	1660.99	56.9409	275.184	908.751	2432.72	33.1549	312.215	11114.7	17490.3	0.6	0.1	0.1	9.5	21.8	0.7	3.1	10.6	34.5	0.4	4	151.9	252.1
7746	2	B5XJ72	DNA-directed RNA polymerase subunit beta OS=Streptococcus pyogenes serotype M49 (strain NZ131) OX=471876 GN=rpoB PE=3	AGTEMTRSVIESIEE	S	318	P	yes	0	14.994	1.86686	4185.37	8805.94	0	549.81	3843.38	4991.11	114.339	125.564	1756.65	1943.22	0.4	0.7	0.1	189.4	429.5	0.7	26.2	135.1	220.9	7.8	8.9	108.8	119.4
30	9	A0A0H3BYP4	Phosphoglucosamine mutase OS=Streptococcus pyogenes serotype M49 (strain NZ131) OX=471876 GN=glmM PE=3	AGVMISASHNPALDN	S	100	M P L	yes	732719	157437	166461	731767	748849	400810	1.23092e+06	1.19873e+06	1.21156e+06	239053	369343	429029	256142	31202.6	6978.1	7931.7	32713.5	34589.3	19231.1	66233.5	55930.2	69226.4	10797.4	16529.7	18961.7	11270.4
3135	1	A0A0H3C0V7	Putative ABC transporter OS=Streptococcus pyogenes serotype M49 (strain NZ131) OX=471876 GN=Spy49_1021 PE=4	AIDDLTITIPNGKII	T	26	M	yes	494.467	402.399	170.904	4274.18	9199.15	676.267	621.255	874.5	1005.74	876.278	1215.66	4493.98	5062.18	173.4	147.1	70.9	1296.5	2738	256.8	156.5	65.1	106.7	296.7	409.5	1512.9	1820.3
3026	1	A0A0H3C0C8	Putative alkaline-shock protein OS=Streptococcus pyogenes serotype M49 (strain NZ131) OX=471876 GN=asp PE=3	AIKDNFQSLLRKENY	S	48	M	yes	522.021	332.805	211.652	947.603	2153.33	528.526	797.561	1365.62	2085.19	1004.24	1866.12	4332.1	6037.91	102.5	68.2	47.4	226.9	485.3	110.8	133.6	320.6	429.1	180.2	317.3	765.1	916.5
730	1	B5XKI1	Elongation factor Tu OS=Streptococcus pyogenes serotype M49 (strain NZ131) OX=471876 GN=tuf PE=3	AKEKYDRSKPHVNIG	S	9	M L	yes	3881.47	970.441	201.814	11692.1	16834.2	563.861	1426	20240.7	13982.1	9207.55	6330.65	48301.4	79959.7	10.2	3.1	0.6	32.3	46.5	1.7	3.8	48.2	34.5	25.2	16.7	125.7	210.4
1705	1	A0A0H3BX54	Xaa-His dipeptidase OS=Streptococcus pyogenes serotype M49 (strain NZ131) OX=471876 GN=Spy49_0844 PE=4	AKFLNQFTFEGAAKD	T	293	M P L	yes	563.077	541.355	244.164	7770.33	21041.6	611.884	712.857	1756.06	1776.83	798.125	1295.67	5351.8	6877.97	28.5	24.4	10.9	302.8	873.3	24.7	34.3	78.4	93.3	39.9	60.8	269.9	361.6
1304	2	A0A0H3C0B4	Uncharacterized protein OS=Streptococcus pyogenes serotype M49 (strain NZ131) OX=471876 GN=Spy49_0994c PE=4	AKLDKLASQNALELA	S	107	M P L	yes	1200.11	1346.26	603.811	18409	24040.8	2202.5	2197.77	10139.1	12550	2700.22	3619.83	14631.8	20124.8	447	584.2	251.2	8203.6	11241.6	924.6	833.2	3947.6	6254	1162	1633.2	7133.3	9500.9
444	2	B5XMJ7	Cell cycle protein GpsB OS=Streptococcus pyogenes serotype M49 (strain NZ131) OX=471876 GN=gpsB PE=3	AKYQARNTVSATVQQ	T	66	M P L	yes	35441	6412.63	19939.8	4903.1	1779.99	20415.7	40935.4	46378.7	36152.4	7334.65	5995.19	5204.35	4259.73	2795	485.9	1573.7	495.7	194	1605.6	3548.6	9223.7	6539.8	640.4	506.4	499.5	462.7
893	3	A0A0H3C124	Putative mannose-specific phosphotransferase system component IID OS=Streptococcus pyogenes serotype M49 (strain NZ131) OX=471876 GN=manN PE=4	ALKKLYTSPEDRATA	S	50	M P L	yes	6204.21	5832.27	3697.64	43292.8	89312.2	9042.16	7427.67	35674.4	37378.2	8695.11	11741.7	40268.7	69830.1	223.3	216.6	102	1188.8	2795.2	341.3	184.4	692.3	880.4	318.9	451.4	1614.3	2822.1
1017	4	A0A0H3BXD5	30S ribosomal protein S12 OS=Streptococcus pyogenes serotype M49 (strain NZ131) OX=471876 GN=rpsL PE=3	ALNIGYNSHKKVQTK	S	48	M P	yes	3736.09	2418.65	1101.37	6347.45	5136.32	8246.82	13498	22976.7	27795.5	3670.61	5134.65	41227.7	32263.9	140.1	68.6	32.6	186.3	194.7	284.9	535.7	746.2	1237.6	135.1	211.1	2062.7	1853
491	3	B5XI40	30S ribosomal protein S6 OS=Streptococcus pyogenes serotype M49 (strain NZ131) OX=471876 GN=rpsF PE=3	ALVARFDSILTDNGA	S	28	M P L	yes	3332.1	3194.44	1711.74	22764.7	49353.6	4508.68	3860.82	24647.1	30195.5	4151.49	4885.89	20410.8	34644.1	39.1	33	19.5	284	738.4	59.8	56.8	282.9	427.5	56	70.5	294.2	547.8
2126	1	A0A0H3C1H3	Fructose-bisphosphate aldolase class II OS=Streptococcus pyogenes serotype M49 (strain NZ131) OX=471876 GN=fba PE=4	APVLIQTSMGAAKYM	S	50	M P L	yes	439.72	391.018	236.885	1635.18	3166.39	969.879	1563.48	10780.1	12359.3	526.783	704.768	1113.4	1906.84	3.1	2.8	1.6	12.5	28	7.5	11.3	59.3	75.2	3.8	5.3	8.7	16.1
1649	2	B5XKP7	ATP synthase subunit b OS=Streptococcus pyogenes serotype M49 (strain NZ131) OX=471876 GN=atpF PE=3	AQSQLIDSYLDDLGE	S	156	M P L	yes	862.805	1159.25	843.139	29047.6	51698.9	2792.94	1729.66	6886.12	4937.49	1497.35	1556.52	9421.56	18521.5	59.1	113.6	77.6	2819.8	4925	256	198.7	852.5	660.8	113.9	116.1	731.2	1548
6205	1	A0A0H3C276	Galactose-6-phosphate isomerase subunit LacA OS=Streptococcus pyogenes serotype M49 (strain NZ131) OX=471876 GN=lacA2 PE=3	ARIITLGSEISAPGI	S	106	M P L	yes	4.83675	0	0	1709.09	5123.83	0	8.10968	7.60839	32.8269	0	2.03339	288.231	797.995	0.5	0	0	60.3	186.9	0	2.7	3.8	15.8	0	0.3	47.7	138.6
344	1	B5XMJ7	Cell cycle protein GpsB OS=Streptococcus pyogenes serotype M49 (strain NZ131) OX=471876 GN=gpsB PE=3	ARNTVSATVQQPVPQ	T	70	M P L	yes	6580.99	1958.5	3185.4	3062.34	3355.38	7430.84	19428.3	84033	87821.1	2194.44	5438.77	15283.8	18830.5	519	148.4	251.4	309.6	365.7	584.4	1684.2	16712.3	15886.4	191.6	459.4	1466.9	2045.4
4963	1	A0A0H3C0J7	Phosphocarrier protein HPr OS=Streptococcus pyogenes serotype M49 (strain NZ131) OX=471876 GN=ptsH PE=3	ASDITLDYKGKAVNL	Y	37	M P	yes	935	1089.2	810.1	1199.6	1971.1	1090.4	845	1805.8	1691.7	784.9	743.2	941.9	546.5	935	1089.2	810.1	1199.6	1971.1	1090.4	845	1805.8	1691.7	784.9	743.2	941.9	546.5
840	1	A0A0H3BZ23	Cell division protein FtsZ OS=Streptococcus pyogenes serotype M49 (strain NZ131) OX=471876 GN=ftsZ PE=3	ASDQAKQSVQPGFDR	S	354	P L	yes	1686.9	1519.65	1392.29	8595.37	9282.25	2496.47	2115.7	8035.58	9655.66	4478.77	8689.63	11016.7	15469.8	26.8	27.7	24.5	149.4	156.5	45.8	33.9	110.3	149.3	79.8	151.2	190.1	272
3252	2	A0A0H3BZC7	EIIAB-Man OS=Streptococcus pyogenes serotype M49 (strain NZ131) OX=471876 GN=manL PE=4	ATAWTPASKADRIIV	S	192	P L	yes	1616.55	777.911	727.998	3328.01	3838.96	391.901	956.767	6936.63	9666.82	1655.88	1378.8	3270.21	8562.85	41.9	26.3	17.8	92.2	128.9	12.1	20.6	134.6	197.2	45	38.4	101.8	293.7
548	1	A0A0H3BZL9	PTS system, fructose-specific IIABC component OS=Streptococcus pyogenes serotype M49 (strain NZ131) OX=471876 GN=fruA PE=4	AVSTEKTSLGGAFYK	S	284	M P L	yes	4305.09	3777.69	2312.68	14656.6	22993.1	5839.65	4610.41	3811.7	3821.34	4877.67	6003.39	21188.8	30486.7	71.8	85.3	48.1	336.7	547.4	87.8	64.9	60.8	60.8	90.2	112.5	419.4	616.6
1598	1	A0A0H3BZV5	PTS system, lactose-specific IIA component (EIIA-Lac) (Lactose-permease IIA component) (Phosphotransferase enzyme II, A component) OS=Streptococcus pyogenes serotype M49 (strain NZ131) OX=471876 GN=lacF PE=4	AYAGDARSKFLEALK	S	22	M L	yes	747.334	390.783	204.221	7166.83	8517.6	247.649	443.445	551.313	456.833	923.336	987.678	5510.02	9450.79	76.6	49.1	10.6	226.4	259.3	30.8	162.5	291.4	219.1	110.7	140.3	839.3	1124.3
8818	2	A0A0H3C1S1	Chaperone protein DnaJ OS=Streptococcus pyogenes serotype M49 (strain NZ131) OX=471876 GN=dnaJ PE=3	AYETLSDSQKRAAYD	S	59	P	yes	679.024	145.419	0	4347.38	3198.37	194.63	899.603	5029.79	4226.23	1616.15	1867.77	7931.76	9474.06	50.6	10.5	0.7	260	209.3	12.3	63	261	285.8	116.2	128.5	579.5	723.5
2570	2	A0A0H3BYG9	Aminopeptidase OS=Streptococcus pyogenes serotype M49 (strain NZ131) OX=471876 GN=pepN PE=3	AYQNNIASIPAAVRR	S	669	M P	yes	957.227	622.015	175.65	7848.22	13741.4	490.281	1621.7	3618.03	4135.32	719.197	1040.2	4042.21	4534.08	68	50.6	13.8	627.3	1103.5	37.2	114	302.6	277.7	54.3	73.8	298.3	338.9
387	1	A0A0H3BYA0	PTS system, IIB component, putative OS=Streptococcus pyogenes serotype M49 (strain NZ131) OX=471876 GN=Spy49_1328c PE=4	CGAGVNSSHQIKDAI	S	15	M P L	yes	6065.87	4509.66	4881.85	35770.2	30929.3	6503.02	3253.06	2227.1	1527.93	10173.3	8276.84	7253.04	6153.97	487.9	429.8	277.4	880.3	852	562.9	694.8	590.7	386.9	708.2	663.3	743	662.1
5991	1	A0A0H3BVI6	Putative V-type Na+-ATPase subunit E OS=Streptococcus pyogenes serotype M49 (strain NZ131) OX=471876 GN=ntpE PE=4	CLKIATDSLDTDFKE	S	29	M	yes	446.746	174.156	134.454	3571.08	5869.56	381.196	569.84	357.568	277.042	419.324	371.09	684.852	744.338	1541.3	674.3	437	1176.6	1812.3	1241.5	3963.4	6631.9	5198.4	1091.4	1046.8	1760.8	2020.4
1467	1	A0A0H3C1K3	Thioredoxin reductase OS=Streptococcus pyogenes serotype M49 (strain NZ131) OX=471876 GN=nox2 PE=3	CVLTEDASYEAKTVI	S	97	M	yes	700.534	536.128	259.868	6537.06	15812.3	855.292	617.462	2953.08	7020.55	1325.25	1969.07	8186.73	16218.3	74.6	57.9	31.6	856	2167.6	98.7	79.9	321.7	766.7	161.7	241.1	1035.9	1915.5
161	12	A0A0H3BZC1	Uncharacterized protein OS=Streptococcus pyogenes serotype M49 (strain NZ131) OX=471876 GN=Spy49_0377 PE=4	DDAVDFDTKVMTLPE	T	30	M L	yes	265611	144691	186046	36602.6	15322.8	213086	426107	150607	127676	153566	112742	43534.2	32622.9	146448	74350.8	81637.7	20033.9	15937	102902	211259	116331	187008	89918.2	70434.7	28915	30126.2
1688	1	B5XJ36	50S ribosomal protein L3 OS=Streptococcus pyogenes serotype M49 (strain NZ131) OX=471876 GN=rplC PE=3	DDKREVLSNKPAKGH	S	61	M P	yes	756.328	641.235	315.29	1721.26	542.792	1017.7	1179.37	1486.79	1818.5	800.18	1358.73	12362.4	17163.1	14.7	13.2	6.7	41.9	15.7	25.5	29.8	35.7	52.5	16	29.2	335.2	496.9
897	5	A0A0H3BZD6	Putative PTS system enzyme II OS=Streptococcus pyogenes serotype M49 (strain NZ131) OX=471876 GN=Spy49_1737c PE=4	DEAKLPETPVSDAPV	T	504	M P L	yes	37281.5	12770.4	6288.11	157023	150125	39161.3	37107.6	45186.8	37192	64723.9	77420	170113	235306	3281.4	1797.6	500.1	9321.8	9281	5051.7	10392.2	17239.6	15780.6	6063.1	7892.9	18286.9	26527.4
3695	2	B5XJR1	Elongation factor G OS=Streptococcus pyogenes serotype M49 (strain NZ131) OX=471876 GN=fusA PE=3	DEDLMMKYLEGEEIT	Y	229	M P L	yes	175.464	182.563	186.802	13961.3	28899.9	262.501	651.148	505.284	871.033	269.6	423.622	1082.04	1596.55	1.6	1.5	1.6	120.2	282.7	2.5	5.6	3	7.1	2.5	4	10.2	15.4
163	2	A0A0H3C2P8	Uncharacterized protein OS=Streptococcus pyogenes serotype M49 (strain NZ131) OX=471876 GN=Spy49_1748c PE=4	DEFIRKETIELANDG	T	13	M L	yes	55143.2	24947.6	29896.4	12588	10827.6	44605.9	53226.6	58681.6	52955.3	40961.3	26217.6	18603.1	19664.9	61918.9	19683.9	24065	10551.7	15449.8	45751.4	62257.5	78112.6	166662	42114.8	29043.4	21382.9	22585.1
5303	2	B5XIY6	Elongation factor Ts OS=Streptococcus pyogenes serotype M49 (strain NZ131) OX=471876 GN=tsf PE=3	DEQHFGAYQHNGGRI	Y	156	P	yes	215.325	57.2289	7.46447	3067.63	2173.7	161.123	272.053	671.9	981.788	462.758	495.211	2917.55	8676.18	3.1	0.8	0.1	47.3	36.2	2.5	4.1	11.4	19	7	7.5	46.3	147.2
862	2	A0A0H3BZL9	PTS system, fructose-specific IIABC component OS=Streptococcus pyogenes serotype M49 (strain NZ131) OX=471876 GN=fruA PE=4	DGIAMPHSKNIVVDK	S	68	M P L	yes	5726.13	2883.09	2163.63	16841.9	12861.7	7356.09	4944.29	10927.3	12218.2	8003.27	9279.91	36865.6	68246.5	95.5	65.1	45	386.9	306.2	110.6	69.6	174.3	194.4	148	173.9	729.7	1380.3
1606	2	B5XKP7	ATP synthase subunit b OS=Streptococcus pyogenes serotype M49 (strain NZ131) OX=471876 GN=atpF PE=3	DIDQAEQSRLSAQQL	S	55	M L	yes	2004.45	1871.54	1187.57	14540.3	9276.41	2737.3	4015.57	6439.43	2890.91	3324.68	4837.15	13668.5	20987.4	137.3	183.4	109.3	1411.5	883.7	250.9	461.3	797.2	386.9	252.9	360.8	1060.8	1754.1
126	1	A0A0H3BXI0	Uncharacterized protein OS=Streptococcus pyogenes serotype M49 (strain NZ131) OX=471876 GN=Spy49_1001c PE=3	DIPAIAESIKAIVSQ	S	85	M P	yes	3688.8	2903.96	1404.34	22999.5	70102.4	4368.93	2703.76	4470.33	7004.62	5821.89	9215.64	39986.7	65460.3	110.7	89.6	46.8	575.1	1710.1	147.4	159.5	151.7	223.3	170.4	285.7	1234.5	2100.1
1321	1	A0A0H3BWK0	PTS system, IIB component OS=Streptococcus pyogenes serotype M49 (strain NZ131) OX=471876 GN=Spy49_0154 PE=4	DIQSASCSVGEAKGL	S	40	M P	yes	789.514	387.596	194.188	25414.9	43923.5	1252.26	1185.31	1657.4	1104.58	1110.55	1105.13	2497.17	2537.81	876.2	428.2	121.2	5169.1	8886	1184.6	3768.4	7204.9	4443.6	1098.4	1190.1	2126.7	2689.1
6494	1	A0A0H3BZ39	Fc-gamma receptor OS=Streptococcus pyogenes serotype M49 (strain NZ131) OX=471876 GN=Spy49_1672c PE=4	DKELSFLSKVLDEAA	S	100	M	yes	1577.1	680.83	126.205	1291.53	1601.27	473.556	339.906	835.19	236.66	685.234	271.655	651.024	960.193	18.9	7.7	1.5	17.4	20.3	5.6	5.4	16.1	6.1	9	3.3	7.9	11.6
7083	1	B5XK61	50S ribosomal protein L11 OS=Streptococcus pyogenes serotype M49 (strain NZ131) OX=471876 GN=rplK PE=3	DKSFDFITKTPPAAV	T	70	M	yes	153.597	120.911	43.9437	1016.81	2081.42	186.461	217.774	1042.27	1815.12	167.883	213.258	552.874	823.742	1.8	1.4	0.5	13.9	36	2.6	3.4	16.2	30.6	2.2	3.1	10.6	19.3
1319	2	A0A0H3BX27	Dihydrolipoyl dehydrogenase OS=Streptococcus pyogenes serotype M49 (strain NZ131) OX=471876 GN=acoL PE=3	DKTVTIGSQTIKGRN	S	253	P L	yes	1793.51	1072.69	760.947	3329.22	8931.36	1868.23	3019.47	10100.4	15090.5	1673.99	2148.2	5080.62	8147.42	72.6	44.3	32.2	143.3	410.8	63.7	87.1	294.5	449.8	75.2	99.7	233.3	391.9
921	2	B5XMA2	UDP-N-acetylglucosamine--N-acetylmuramyl-(pentapeptide) pyrophosphoryl-undecaprenol N-acetylglucosamine transferase OS=Streptococcus pyogenes serotype M49 (strain NZ131) OX=471876 GN=murG PE=3	DLLRADISSAIKEK-	S	354	M L	yes	2184.11	2799.04	2158.33	6645.89	7424.45	3623.16	2671.61	2973.39	2409.42	4051.73	6847.38	11693.5	10894.9	2587	2154.3	1808	4741.3	5607.6	3614.3	2455.1	2555.3	2441.6	5245.1	9197.8	12682.8	11611.2
3229	1	A0A0H3BY55	Non-specific serine/threonine protein kinase OS=Streptococcus pyogenes serotype M49 (strain NZ131) OX=471876 GN=Spy49_1257c PE=4	DLMTALSYNRSRERK	Y	275	M P L	yes	1355.93	1121.01	657.135	2217.87	3206.71	1197.89	1274.02	2042.28	1552.93	1771.73	1760.91	3688.21	4856.8	124	91.6	62.3	192.9	269.1	108.6	121.3	166	201.6	170.8	164.9	372	502.4
9597	1	A0A0H3C1H6	Cysteine synthase OS=Streptococcus pyogenes serotype M49 (strain NZ131) OX=471876 GN=cysM PE=3	DNGERYLSTELYDVP	S	301	M P	yes	55.3037	37.7485	0	1842.65	3766.52	63.8782	14.279	295.743	498.178	48.9083	57.2322	382.519	740.656	0.9	0.6	0	22.3	47.8	1.2	0.5	9.9	19.9	0.8	1	6.7	12.6
668	2	A0A0H3BXY9	Isoleucine--tRNA ligase OS=Streptococcus pyogenes serotype M49 (strain NZ131) OX=471876 GN=ileS PE=3	DPTTRMRSYNAFVCD	S	888	M P L	yes	5559.34	5443.71	2518.3	59177	61113.6	7287.64	5766.57	12824.9	15263.1	9144.77	10523.9	23275.8	31288.7	351.3	424.8	180.3	4380.9	4249.4	556.3	356.3	615.5	739.2	606	717.9	1546	2156.9
1060	5	A0A0H3BZR7	Mid-cell-anchored protein Z OS=Streptococcus pyogenes serotype M49 (strain NZ131) OX=471876 GN=mapZ PE=3	DQFLSEDSHHPAKQN	S	167	M P L	yes	8081.88	2550.81	1112.26	18199.8	12154.4	4394.75	9316.22	10951	7527.31	11687.9	12398.1	27748	48141.7	599.6	229.4	103.8	1622	1242.7	341.5	713.3	1048.2	948.7	865.7	940.5	2436.5	5142.8
3077	1	A0A0H3BZL6	Beta-glucoside permease IIABC component OS=Streptococcus pyogenes serotype M49 (strain NZ131) OX=471876 GN=Spy49_0485 PE=4	DQQVKAISNVIGVMR	S	49	M L	yes	535.287	297.817	129.727	2884.95	5860.47	337.98	293.31	314.996	362.976	739.886	860.608	2539.62	4013.2	866.3	796	250.6	3693.4	8368.1	1473.7	2533	2018.8	3323.5	3057.2	4013.8	11080	17469.3
3408	2	B5XKW7	30S ribosomal protein S16 OS=Streptococcus pyogenes serotype M49 (strain NZ131) OX=471876 GN=rpsP PE=3	DRVLEWLSKGAQPSD	S	61	M	yes	185.789	108.626	39.5076	1331.85	2756.84	108.238	205.432	2091.91	3131.62	231.531	321.558	3406.7	8032.62	3.3	1.6	0.6	25.7	68.3	2.1	4.2	38.7	78.8	4.6	6.7	89	253.9
48	4	A0A0H3BZ18	Cell-division initiation protein OS=Streptococcus pyogenes serotype M49 (strain NZ131) OX=471876 GN=divIVA PE=4	DSASFDATRQFTPEE	T	201	M P L	yes	249269	134173	118316	67185.1	44985.5	178513	122080	315647	562066	114332	166910	61045.9	54506.1	6852	3441.9	3047.7	1707.3	1119.1	4950.9	2779.2	7995.8	15889.2	3527.4	5112.5	2014.9	1850.4
4020	1	B5XIY6	Elongation factor Ts OS=Streptococcus pyogenes serotype M49 (strain NZ131) OX=471876 GN=tsf PE=3	DSKTVEAYLDSVNAK	Y	305	M P	yes	118.081	50.0753	22.3934	2574.73	6328.94	161.123	265.418	583.492	671.749	118.995	198.084	1064.94	2782.04	1.7	0.7	0.3	39.7	105.4	2.5	4	9.9	13	1.8	3	16.9	47.2
7816	2	B5XIF1	Phosphoglycerate kinase OS=Streptococcus pyogenes serotype M49 (strain NZ131) OX=471876 GN=pgk PE=3	DTEGEAVSEGFLGLD	S	291	P	yes	0	0	0	2416.04	5884.26	10.1661	40.5876	2288.43	2914.69	10.2405	10.3375	416.355	1052.23	0	0	0	26.5	67.1	0.1	0.4	19.2	28.1	0.1	0.1	4.2	10.8
1539	2	B5XJ52	50S ribosomal protein L18 OS=Streptococcus pyogenes serotype M49 (strain NZ131) OX=471876 GN=rplR PE=3	DVSKGTKTEQAVVVG	T	69	M P L	yes	373.444	169.361	120.2	1713.42	1727.17	561.112	533.805	1776.55	3262.2	805.008	2769.64	16057	11198.3	12.7	7.4	4.8	82.2	83.5	23	21	93.7	139.3	25.5	86.8	546.2	399.1
1885	1	A0A0H3BWH3	Putative calcium-transporting ATPase OS=Streptococcus pyogenes serotype M49 (strain NZ131) OX=471876 GN=pacL PE=4	EAALTGESVPVEKDL	S	178	M P L	yes	1153.74	1235.82	972.509	4036.52	10802.8	1916.9	1428.22	1604.68	1312.27	1432.09	1631.19	3428.87	10374.6	91.7	85.2	71.5	273.7	910.5	150.7	105.9	96.3	89.2	126.1	153.6	315	1012.5
1542	1	A0A0H3C219	Uncharacterized protein OS=Streptococcus pyogenes serotype M49 (strain NZ131) OX=471876 GN=Spy49_1782 PE=4	EAASEIISNVLGKHL	S	60	M L	yes	1050.69	775.415	434.273	8265.22	14384.1	895.802	877.015	8535.01	7889.44	1344.63	1384.35	2660.99	3592.29	829.4	712.4	403.1	7109.6	15141.2	885.2	316	563.7	582.3	1058.7	1304	2500.3	3279.9
2469	1	B5XIF1	Phosphoglycerate kinase OS=Streptococcus pyogenes serotype M49 (strain NZ131) OX=471876 GN=pgk PE=3	EADKEGKSLAPVAAD	S	73	P L	yes	57.2921	20.9167	0	2589.26	6138.57	60.9967	71.0284	4791.39	10548.9	92.1648	72.3623	376.702	1256.83	0.5	0.2	0	28.4	70	0.6	0.7	40.2	101.7	0.9	0.7	3.8	12.9
15455	1	A0A0H3BZQ5	SSU ribosomal protein S1p OS=Streptococcus pyogenes serotype M49 (strain NZ131) OX=471876 GN=rpsA PE=4	EARAEVFSKISEGAV	S	189	M	yes	84.0826	22.2242	14.397	733.748	711.037	39.2487	52.7104	273.262	331.43	74.6564	92.1245	296.72	544.484	1.2	0.3	0.2	10.6	10.3	0.6	0.7	3.8	5	1.1	1.4	4.6	8.5
2129	2	A0A0H3BX58	Uncharacterized protein OS=Streptococcus pyogenes serotype M49 (strain NZ131) OX=471876 GN=Spy49_0129 PE=4	EARTIYDSYDAKKKA	S	21	M	yes	918.201	1062.48	455.917	11883.7	17383.6	1313.88	524.525	581.651	552.957	1401.62	1686.98	4144.8	4899.94	2911.8	4049.9	1469.9	4408.8	6120.7	3967.8	2823.1	5821.1	6306.7	3322.8	4266.3	10000.8	11868.5
1229	1	B5XK64	Ribosome-recycling factor OS=Streptococcus pyogenes serotype M49 (strain NZ131) OX=471876 GN=frr PE=3	EARVLLISPFDKSSI	S	68	M P L	yes	984.864	527.929	221.615	6307.49	15162.3	711.444	680.032	4435.85	7026.21	1164.95	1520.12	8658.05	15086.2	26.6	17.6	7.5	211.3	560.8	23.5	23	137.1	206.7	37	47.7	262.2	522.7
4102	1	B5XJH8	Adenylosuccinate synthetase OS=Streptococcus pyogenes serotype M49 (strain NZ131) OX=471876 GN=purA PE=3	EDITGVRSLDELPEN	S	385	M	yes	182.824	120.17	43.98	1965.32	4654.06	296.835	235.833	1980.98	3766.84	256.537	373.265	2523.53	3909.08	11.1	8	3.3	156.5	359.2	18.6	11.2	74.9	164.5	16.4	25	175.8	266.7
15819	1	A0A0H3BZJ0	Formate acetyltransferase OS=Streptococcus pyogenes serotype M49 (strain NZ131) OX=471876 GN=pfl PE=3	EDVIVRISGYCVNTK	S	737	M	yes	0	0	0	479.097	1465.72	0	0	0	0	2.63318	0	2.16797	27.1731	0	0	0	5.2	17.1	0	0	0	0	0.1	0	0.1	1.3
498	2	A0A0H3C004	Uncharacterized protein OS=Streptococcus pyogenes serotype M49 (strain NZ131) OX=471876 GN=Spy49_0627 PE=4	EEKIVDDTIGTRTRK	T	14	M L	yes	10954.1	4733.64	8966.71	9982	9748.86	11782.7	14338.4	23756.6	23718.9	7686.89	5301.73	5802.85	10123.2	2420.3	1693.5	2796	2985.1	2968.6	3389.6	4062.4	6501.7	7299.9	1838.8	1274.8	1495.4	2835.4
2443	1	A0A0H3BZV5	PTS system, lactose-specific IIA component (EIIA-Lac) (Lactose-permease IIA component) (Phosphotransferase enzyme II, A component) OS=Streptococcus pyogenes serotype M49 (strain NZ131) OX=471876 GN=lacF PE=4	EELIAAGSDCLNDAH	S	47	P	yes	831.238	302.439	541.377	9803.74	10173.2	308.757	365.126	270.17	150.54	677.28	694.824	2069.95	3057.24	85.2	38	28.1	309.7	309.7	38.4	133.8	142.8	72.2	81.2	98.7	315.3	363.7
5140	2	B5XKI1	Elongation factor Tu OS=Streptococcus pyogenes serotype M49 (strain NZ131) OX=471876 GN=tuf PE=3	EERERGITINTAHVE	T	65	M P	yes	608.858	125.218	134.543	2461.5	3330.65	298.514	1013.21	2855.53	4579.63	1205.75	1630.05	4534.26	6308.61	1.6	0.4	0.4	6.8	9.2	0.9	2.7	6.8	11.3	3.3	4.3	11.8	16.6
1647	2	B5XLE2	50S ribosomal protein L10 OS=Streptococcus pyogenes serotype M49 (strain NZ131) OX=471876 GN=rplJ PE=3	EFKVIKNSILTRAAE	S	59	M L	yes	40.0426	22.1636	0	212.337	302.32	18.9605	84.0693	807.774	1231.98	111.776	390.234	19181.5	11531	0.6	0.3	0	3.2	5.3	0.3	1.3	13.5	21.7	1.7	6	315.5	198.4
575	2	B5XKI1	Elongation factor Tu OS=Streptococcus pyogenes serotype M49 (strain NZ131) OX=471876 GN=tuf PE=3	EGGRTVGSGIVSEIE	S	390	M P L	yes	1522.15	939.137	571.807	35112.6	82216.3	1890.59	975.683	19862.7	28977.3	1278.83	1705.86	14371.3	43134.1	4	3	1.7	97	227.1	5.7	2.6	47.3	71.5	3.5	4.5	37.4	113.5
2981	1	A0A0H3C0F2	Tagatose 1,6-diphosphate aldolase OS=Streptococcus pyogenes serotype M49 (strain NZ131) OX=471876 GN=lacD2 PE=3	EKISDNASPEFAKVK	S	177	M P	yes	833.128	538.647	403.643	6720.38	12404.2	673.834	702.157	1812.96	1810.97	639.801	627.109	1428.83	3334.25	44.4	44.7	11.7	133.7	260.5	55	114.4	367.6	361	42.7	48.4	115.6	269.4
1988	2	A0A0H3BXI0	Uncharacterized protein OS=Streptococcus pyogenes serotype M49 (strain NZ131) OX=471876 GN=Spy49_1001c PE=3	EKLKDTISDTVNSDE	S	152	M P L	yes	3332.25	1474.67	2280.56	11957.6	7534.54	3805.77	3519.13	7060.59	8588.74	3785.59	4825.55	13510.3	19599.7	100	45.5	76	299	183.8	128.4	207.6	239.6	273.8	110.8	149.6	417.1	628.8
2145	3	A0A0H3BZL3	Conserved hypothetical integral membrane protein OS=Streptococcus pyogenes serotype M49 (strain NZ131) OX=471876 GN=Spy49_1194c PE=4	ELFQLQNSGEDLNKR	S	186	M P L	yes	5041.42	2751.71	1076.57	46600.4	79618.2	3312.52	5301.32	3493.59	2580.39	7174.79	8409.47	22640.3	38413.6	2228	911	310.8	3710.1	6465.5	1167.2	2907.9	2090.8	1876.5	2692	3275.4	9144.9	17104.2
469	1	B5XHZ0	Chaperone protein DnaK OS=Streptococcus pyogenes serotype M49 (strain NZ131) OX=471876 GN=dnaK PE=3	ELKAAQESGNLDDMK	S	548	M P L	yes	2423.61	2969.24	2195.79	21582.6	34671.7	3469.93	2261.65	12337.3	15788.1	3807.13	4861.26	16910.8	29844.8	12.7	19.2	13.3	124.9	227.2	20.8	15.2	61.2	94.8	22.3	27.4	103.2	186
686	1	B5XIW7	Chaperonin GroEL OS=Streptococcus pyogenes serotype M49 (strain NZ131) OX=471876 GN=groEL PE=3	ELKDATMTALGQAAK	T	313	M P L	yes	2175.75	2004.91	1186.02	10668	22509.4	3561.59	3048.85	12028.8	14379.2	3109.29	4042.23	13909.5	22034.5	8.8	9.8	6.4	58.2	122.3	16.3	18.7	57.4	82.7	14	17.2	62.6	99.8
1005	4	B5XJ57	Adenylate kinase OS=Streptococcus pyogenes serotype M49 (strain NZ131) OX=471876 GN=adk PE=3	EMGRLAKSYIDKGEL	S	51	M P L	yes	5338.62	3445.93	4698.04	22861.9	30444.6	1932.32	1680.57	13157.7	14919.9	4318.73	5458.34	27046.1	37065.1	189.5	109.3	173.8	913.4	1318.7	79.3	63.3	375.1	462.9	160.8	223.7	1069.2	1465.4
3215	1	A0A0H3BZQ5	SSU ribosomal protein S1p OS=Streptococcus pyogenes serotype M49 (strain NZ131) OX=471876 GN=rpsA PE=4	ENPKDVLSVGQEVTV	S	324	M P	yes	441.434	370.403	230.352	3294.94	6137.01	654.145	1144.57	2452.17	3002.75	332.56	579.068	1728.72	1774.38	6.3	5	3.2	47.6	88.9	10	15.2	34.1	45.3	4.9	8.8	26.8	27.7
1787	3	B5XHZ0	Chaperone protein DnaK OS=Streptococcus pyogenes serotype M49 (strain NZ131) OX=471876 GN=dnaK PE=3	EQHIVIKSNDGLSEE	S	473	M P	yes	973.262	216.507	82.5487	5650.52	4181.35	233.553	1383.77	8890.14	7577.61	1656.02	1916.12	7029.77	11665.1	5.1	1.4	0.5	32.7	27.4	1.4	9.3	44.1	45.5	9.7	10.8	42.9	72.7
1439	2	B5XJ77	Arginine--tRNA ligase OS=Streptococcus pyogenes serotype M49 (strain NZ131) OX=471876 GN=argS PE=3	EQVITAGSDYAQQDE	S	101	M P L	yes	942.472	270.382	125.091	15503.2	18311.7	691.336	1759.46	4333.84	4709.93	979.283	1293.82	6702.24	6786.35	36.9	11.4	5.3	684.3	855.9	26.3	60.5	130	145.7	44.7	57	306.7	313.3
5593	2	B5XKM7	Enolase OS=Streptococcus pyogenes serotype M49 (strain NZ131) OX=471876 GN=eno PE=3	ERKVYDYTKFEGEGA	T	260	M P	yes	738.717	293.352	81.6843	2847.19	5140.47	240.005	1069.71	1993.41	2690.51	587.742	865.381	2415.64	3407.21	2.5	1.1	0.3	11	19.5	0.9	3.6	5.5	7.5	2.1	3.1	9	13.4
1323	1	B5XJM4	Glycerol-3-phosphate dehydrogenase [NAD(P)+] OS=Streptococcus pyogenes serotype M49 (strain NZ131) OX=471876 GN=gpsA PE=3	ESILGMMSNEFRSEN	S	328	M P L	yes	414.767	676.618	263.601	14767.7	31013.3	397.935	878.799	6126.31	5536.66	1145.43	1205.04	8006.65	9647.72	16.9	24.7	11.5	561.7	1225.7	14.6	34.4	164.6	185.7	47.5	46.4	311.6	356.9
8268	1	B5XKM5	Septation ring formation regulator EzrA OS=Streptococcus pyogenes serotype M49 (strain NZ131) OX=471876 GN=ezrA PE=3	ESIRANSSELVTLDL	S	273	P	yes	14.5539	26.3989	13.2845	1872.67	3917.82	21.7627	43.5649	519.386	637.741	12.0847	8.10343	437.523	746.869	1.4	2.8	1.4	185.4	362.8	2.4	4.5	50.7	60.3	1.2	0.8	42.2	73.4
439	2	A0A0H3BZR7	Mid-cell-anchored protein Z OS=Streptococcus pyogenes serotype M49 (strain NZ131) OX=471876 GN=mapZ PE=3	ESKEVEVTKESQTLG	T	11	M P L	yes	25607	6214.68	10210.7	6792.94	1126.73	26126.6	39732	33275	22213	20824	9247.51	3520.18	1940.53	1899.8	558.9	952.9	605.4	115.2	2030.2	3042.1	3185	2799.6	1542.4	701.5	309.1	207.3
1171	1	B5XKI1	Elongation factor Tu OS=Streptococcus pyogenes serotype M49 (strain NZ131) OX=471876 GN=tuf PE=3	ETKKAVVTGVEMFRK	T	261	M P L	yes	1141.61	845.223	369.992	9809.82	16834.2	1227.23	1050.74	4577.25	5471.24	2009.58	2615.66	6493.98	11097.1	3	2.7	1.1	27.1	46.5	3.7	2.8	10.9	13.5	5.5	6.9	16.9	29.2
2926	1	A0A0H3C0H8	2-amino-4-hydroxy-6-hydroxymethyldihydropteridine diphosphokinase OS=Streptococcus pyogenes serotype M49 (strain NZ131) OX=471876 GN=folK PE=4	ETQAIEQSLGRVRHE	S	80	M P L	yes	407.679	572.192	310.958	3705.7	6714.6	744.923	591.291	1852.7	2834.09	715.446	811.105	2534.83	4452.2	90.6	96.8	53.1	628.6	1108.3	127.7	94.2	265.9	502.2	154.1	171.7	594.5	1014.9
3292	1	A0A0H3BXQ2	DNA translocase FtsK OS=Streptococcus pyogenes serotype M49 (strain NZ131) OX=471876 GN=ftsK PE=3	ETQKASASMIQRRLS	S	760	M	yes	647.513	550.13	389.323	4143.12	6059.15	753.945	805.183	1139.04	1079.02	739.662	888.982	1838.56	2002.67	345.1	286.1	207	2232.3	3673.3	472.4	455	740.4	747.8	454.8	617	1340.1	1546.5
1145	1	A0A0H3BZQ5	SSU ribosomal protein S1p OS=Streptococcus pyogenes serotype M49 (strain NZ131) OX=471876 GN=rpsA PE=4	EVEVKVLSIDEEAGR	S	249	M P	yes	1177.16	1214.92	619.07	9490.26	16733.5	1419.49	2198.78	4587.93	4997.96	1520.28	2007	7282.54	11440.6	16.8	16.4	8.6	137.1	242.4	21.7	29.2	63.8	75.4	22.4	30.5	112.9	178.6
12204	2	B5XJ50	30S ribosomal protein S8 OS=Streptococcus pyogenes serotype M49 (strain NZ131) OX=471876 GN=rpsH PE=3	EVLEVPASNIKKGIA	S	30	P L	yes	325.006	51.9205	13.1791	1062.01	1132.16	71.8311	591.643	4106.68	5176.26	150.011	187.314	6204.79	11303.7	2.1	0.4	0.1	10.3	11.4	0.6	5.4	36.7	51.2	1.1	1.5	55	103.9
635	2	A0A0H3C2S7	Uncharacterized protein OS=Streptococcus pyogenes serotype M49 (strain NZ131) OX=471876 GN=Spy49_1801c PE=4	EVSKNKETLVIPVKT	T	125	M P L	yes	6559.04	671.789	2289.91	911.454	195.522	4069.51	19311.5	43333.8	43333.6	921.155	805.222	806.899	629.013	1412.1	131.9	455.1	186.6	42.7	827.4	2982	6151.8	8291.6	231.1	209	215.1	180.1
1220	2	B5XIW8	Co-chaperonin GroES OS=Streptococcus pyogenes serotype M49 (strain NZ131) OX=471876 GN=groES PE=3	FDDEKEQTVGGFVLA	T	20	M P	yes	10993	708.029	1464.27	4116.83	1740.59	2061.36	8215.47	10953.5	11141	11933.7	10601.4	13078.6	15814.8	85.7	6.6	14.8	42.6	19.4	18.1	98.7	117.4	141.4	103.6	85.6	109.7	143
2442	2	A0A0H3BYB7	LSU ribosomal protein L23p (L23Ae) OS=Streptococcus pyogenes serotype M49 (strain NZ131) OX=471876 GN=rplW PE=3	FDGVKVASVNTVNVK	S	53	M P L	yes	208.175	55.9632	13.2927	418.007	443.142	222.066	190.538	707.473	1172.34	140.991	290.033	7236.94	15254.6	6.2	1.7	0.4	13.8	15.9	7.8	6	23.8	36.9	4.1	8.4	250	515.7
5227	1	A0A0H3BYQ9	PTS system, IIB component OS=Streptococcus pyogenes serotype M49 (strain NZ131) OX=471876 GN=Spy49_0834 PE=4	FDKSDPASKVKVTPS	S	116	M L	yes	251.051	154.566	32.2774	6681.51	2240.24	75.4962	41.1759	164.212	123.914	155.707	167.085	703.889	1301.19	10.6	8.8	1.1	119.6	43.2	4.1	3.9	13.8	11.8	8	9	40.4	75.8
1676	1	B5XLX3	D-alanyl carrier protein OS=Streptococcus pyogenes serotype M49 (strain NZ131) OX=471876 GN=dltC PE=3	FNIKVPISEFGRDDW	S	56	M L	yes	1421.44	1052.51	828.296	4970.64	10058.9	1813.6	1525.36	5858.04	6612.78	1617.59	2195.7	4733.75	4921.85	88.6	71.1	56.7	328.2	656.9	129.9	110	342.4	474.2	108.9	158.3	361.1	426.7
4225	2	A0A0H3BXP9	Putative rhamnosyltransferase OS=Streptococcus pyogenes serotype M49 (strain NZ131) OX=471876 GN=rgpAc PE=4	FNQSVAKSAALYWSK	S	327	M L	yes	306.997	279.647	201.662	3441.58	5515.73	343.928	242.204	586.852	551.054	465.435	647.343	2498.55	3274.67	460	357.1	297.8	4280.8	6689.7	476.2	279.4	353.3	382.8	618.6	845.5	2352	2566.2
4483	2	A0A0H3BZB4	Phosphoenolpyruvate-protein phosphotransferase OS=Streptococcus pyogenes serotype M49 (strain NZ131) OX=471876 GN=ptsI PE=3	FPTEDEQYEAYKAVL	Y	316	P	yes	152.605	119.307	5.68723	7765.4	14065.5	90.893	239.119	3022.75	2710.13	156.837	263.183	2355.3	3449.74	2.3	2.4	0.1	159.7	312.4	1.7	3.2	39.7	36.5	2.7	4.8	45.2	74
3062	1	B5XJ37	50S ribosomal protein L4 OS=Streptococcus pyogenes serotype M49 (strain NZ131) OX=471876 GN=rplD PE=3	FVAVEGLSFAAPKTA	S	130	M P L	yes	374.546	313.771	159.855	5965.59	12860.7	343.969	883.663	2199.15	4548.11	456.966	638.025	1853.94	2778.54	4.2	3.7	1.9	76.4	174.5	4.8	11.5	26.9	62.6	5.4	7.5	20.8	29.7
599	2	B5XM69	2,3-bisphosphoglycerate-dependent phosphoglycerate mutase OS=Streptococcus pyogenes serotype M49 (strain NZ131) OX=471876 GN=gpmA PE=3	FVGAHGNSIRALVKH	S	185	M P L	yes	707.633	262.888	189.708	18520.1	29650.2	466.282	912.014	35597.1	62488.4	480.907	543.205	2663.47	10145.1	7.4	2.9	2.1	212.9	362.5	5.3	9.6	365.6	732.4	5.2	5.9	30.2	120.5
615	4	A0A0H3C2K4	Alkyl hydroperoxide reductase C OS=Streptococcus pyogenes serotype M49 (strain NZ131) OX=471876 GN=ahpC PE=3	GAETLTPSLDLVGKI	S	179	M P L	yes	2630.15	1562.65	683.19	21491.2	53063	2930.35	2267.78	8327.06	14334.2	3834.72	6096.7	19257.4	38357	37.6	23.6	12.4	244.5	535.3	39.5	43.7	126.9	252.8	53.8	76.1	217.5	444.8
2292	1	A0A0H3BYS4	Dihydropteroate synthase OS=Streptococcus pyogenes serotype M49 (strain NZ131) OX=471876 GN=folP PE=3	GCRFVSATDEIDRVV	T	69	M	yes	768.834	550.687	351.633	4370.23	6671.52	1061.98	1072.91	3821.12	4538.74	871.614	1180.15	4083.89	5442.42	102.6	57.1	39	440.9	663.5	109.5	100.9	278.3	451.4	106	135.1	500.3	663.8
1848	1	B5XLC6	Elongation factor 4 OS=Streptococcus pyogenes serotype M49 (strain NZ131) OX=471876 GN=lepA PE=3	GDFVTMDYIDDNRVN	Y	443	M L	yes	633.49	672.391	286.989	9243.17	16108.3	895.288	496.064	1322.36	1076.27	1287.78	1919.36	7489.55	9160.22	14.5	21.7	8.5	274.5	431.8	25.4	12.1	34.6	25.6	29.1	42.5	169.9	211.3
4003	1	B5XJ13	Phosphate acyltransferase OS=Streptococcus pyogenes serotype M49 (strain NZ131) OX=471876 GN=plsX PE=3	GDQTKINSYLIQSDR	S	45	M	yes	844.065	596.379	307.064	3579.91	4917.8	856.686	1112.73	2204.07	2489.6	751.763	965.707	3048.68	4310.72	120.8	80.9	43.8	516	716.2	122.8	139.1	300	376	98.9	127.4	424.8	578.2
2229	1	A0A0H3BWH3	Putative calcium-transporting ATPase OS=Streptococcus pyogenes serotype M49 (strain NZ131) OX=471876 GN=pacL PE=4	GDRVNMGYQNSNVTY	Y	203	M P L	yes	2843.46	3083.75	1445.84	1318.47	1195.97	4893.38	5854.49	1634.67	489.896	3903.32	3203.97	3197.01	5401.96	226	212.6	106.3	89.4	100.8	384.7	434.1	98.1	33.3	343.7	301.7	293.7	527.2
5085	1	B5XJW0	GTPase Der OS=Streptococcus pyogenes serotype M49 (strain NZ131) OX=471876 GN=der PE=3	GEDRVIASPVAGTTR	S	203	M L	yes	219.746	115.006	48.9681	1098.78	1398.9	228.309	222.028	995.625	760.293	345.499	491.33	1686.46	2604.83	25.3	14.6	6.3	148.9	201.5	32	25.9	93.2	82.6	45.1	61.6	211.7	305.4
3349	1	A0A0H3BZS4	dTDP-4-dehydrorhamnose 3,5-epimerase OS=Streptococcus pyogenes serotype M49 (strain NZ131) OX=471876 GN=rmlC PE=4	GETFGNVYQTVIDAS	Y	109	M P	yes	388.431	192.968	95.4467	5201.29	11724	483.533	421.178	2028.98	2601.05	765.422	1072.57	7703.89	14127.8	18.8	10.1	5.1	290.2	701	22.9	21.3	97.9	131.2	40.8	55.6	405.8	800.4
2083	2	B5XHX4	Serine--tRNA ligase OS=Streptococcus pyogenes serotype M49 (strain NZ131) OX=471876 GN=serS PE=3	GFSAAKTYDVEVWIP	Y	334	M P L	yes	618.997	606.752	192.954	12734.4	26213.1	611.809	365.426	7041.72	6922.28	728.556	1059	4802.35	6289.87	57.7	58.9	17.8	856.4	1771.7	56.5	34.2	306.6	362.2	69.1	105	483.1	691.9
2930	1	A0A0H3BXC6	Signal recognition particle receptor FtsY OS=Streptococcus pyogenes serotype M49 (strain NZ131) OX=471876 GN=ftsY PE=3	GFSARLNSFFANFRR	S	232	M P L	yes	475.29	382.131	132.938	4520.91	9851.86	180.309	454.657	1941.55	2133.87	726.269	919.973	4186.97	6926.88	36.9	32.5	12.8	446.7	1002.8	14.6	39.9	156.4	186.8	54.3	68.7	335.1	569.7
3255	1	A0A0H3C0D5	Dihydrolipoamide acetyltransferase component of pyruvate dehydrogenase complex OS=Streptococcus pyogenes serotype M49 (strain NZ131) OX=471876 GN=acoC PE=3	GIDLATVSGTGFNGK	S	196	M P L	yes	442.124	249.027	84.3185	3306.28	6390.18	510.033	496.524	3482.06	4752.74	468.502	600.35	2434.79	2700.26	24.5	15.9	5.3	219.1	402.9	25	19.1	153.3	223.6	33.6	42.4	175.3	203.7
4412	1	A0A0H3BZ60	Histidine kinase OS=Streptococcus pyogenes serotype M49 (strain NZ131) OX=471876 GN=Spy49_1240c PE=4	GIEQNDISIVRLTYE	S	278	M	yes	1028.25	1007.25	678.026	2465.6	4923.29	909.897	1899.08	2074.57	2695.72	623.617	710.377	2581.92	4209.29	2859.3	2706.9	1925.8	4833	9132.4	2477.3	5979.8	6607.1	7038.7	1374.1	1474.2	5247.9	7860.2
278	2	A0A0H3BZJ0	Formate acetyltransferase OS=Streptococcus pyogenes serotype M49 (strain NZ131) OX=471876 GN=pfl PE=3	GIFRAYTSNIRRARH	S	155	M L	yes	5903.61	6018.68	4695.2	49540.5	111472	7441.85	8163.26	11738.6	14139	6643.52	8305.44	30694.1	49034.9	159.7	228.6	87	537.7	1300.5	210.6	211.8	368.4	482	252.3	355.9	1415.8	2345.9
8851	2	A0A0H3C2K4	Alkyl hydroperoxide reductase C OS=Streptococcus pyogenes serotype M49 (strain NZ131) OX=471876 GN=ahpC PE=3	GKEIAEFSAQAYHDG	S	12	P	yes	447.686	92.6995	16.5288	1810.71	4203.01	237.396	300.986	1273.01	1604.66	406.281	512.731	1823.92	2656.01	6.4	1.4	0.3	20.6	42.4	3.2	5.8	19.4	28.3	5.7	6.4	20.6	30.8
6033	1	A0A0H3BYJ6	CsbD domain-containing protein OS=Streptococcus pyogenes serotype M49 (strain NZ131) OX=471876 GN=Spy49_1002c PE=3	GKISGDKSLETEGKV	S	29	M	yes	547.6	92.1	28	1251.5	1469.5	475.8	403.8	1687.3	2187.5	530.6	660.7	1268.6	757.1	547.6	92.1	28	1251.5	1469.5	475.8	403.8	1687.3	2187.5	530.6	660.7	1268.6	757.1
718	1	A0A0H3BYE4	Signal recognition particle protein OS=Streptococcus pyogenes serotype M49 (strain NZ131) OX=471876 GN=ffh PE=3	GKKKLSESDVQEVTK	S	26	M P L	yes	2578.22	2230.5	1260.9	13414.3	19785.2	3733.99	3363.05	10180.2	10165	3239.35	4314.93	13973.2	17363.6	121.3	106.7	64.3	690.8	1058.2	190.2	188.1	499	591	162.9	222.7	747.3	941.4
2431	1	B5XIF1	Phosphoglycerate kinase OS=Streptococcus pyogenes serotype M49 (strain NZ131) OX=471876 GN=pgk PE=3	GLDIGPKSIAEFDQA	S	303	M P L	yes	34.3753	20.9167	10.2032	4166.52	11216	40.6645	30.4407	4839.07	9563.49	92.1648	134.387	535.314	3010.54	0.3	0.2	0.1	45.7	127.9	0.4	0.3	40.6	92.2	0.9	1.3	5.4	30.9
997	1	B5XIW7	Chaperonin GroEL OS=Streptococcus pyogenes serotype M49 (strain NZ131) OX=471876 GN=groEL PE=3	GLELKDATMTALGQA	T	311	M P L	yes	815.907	756.957	352.1	5773.9	17816.1	1223.61	929.328	11358.2	21421	977.206	1363.08	6265.94	19937	3.3	3.7	1.9	31.5	96.8	5.6	5.7	54.2	123.2	4.4	5.8	28.2	90.3
486	4	B5XJR1	Elongation factor G OS=Streptococcus pyogenes serotype M49 (strain NZ131) OX=471876 GN=fusA PE=3	GMEAHGNSQIVRAYV	S	638	M P L	yes	6612.79	4515.4	2475.13	39154.3	54671.6	8935.53	9616.06	37323.7	46128	9403.65	10569.4	71754	107062	60.3	37.1	21.2	337.1	534.8	85.1	82.7	221.6	376	87.2	99.8	676.4	1032.7
1316	2	A0A0H3C1S1	Chaperone protein DnaJ OS=Streptococcus pyogenes serotype M49 (strain NZ131) OX=471876 GN=dnaJ PE=3	GMMRRQVTCDICHGS	T	189	M P L	yes	1951.19	815.734	310.871	8504.14	5808.41	1462.09	1942	9360.03	8477.6	3055.66	3447.75	9154.03	11691	145.4	58.9	20.4	508.6	380.1	92.4	136	485.7	573.3	219.7	237.2	668.8	892.8
7094	1	A0A0H3C276	Galactose-6-phosphate isomerase subunit LacA OS=Streptococcus pyogenes serotype M49 (strain NZ131) OX=471876 GN=lacA2 PE=3	GMVAAEVSDERSAYM	S	85	M P	yes	141.233	185.012	47.9918	2213.6	4060.14	338.276	481.475	336.771	65.8617	158.651	234.517	641.117	963.236	14.6	27.7	2	78.1	148.1	54.2	160.3	168.2	31.7	20.8	34.6	106.1	167.3
941	4	B5XKM7	Enolase OS=Streptococcus pyogenes serotype M49 (strain NZ131) OX=471876 GN=eno PE=3	GMVPSGASTGEHEAV	S	42	M P L	yes	4107.27	2453.49	1688.14	24045.8	30974.6	5013.43	9122.27	89014.8	90759.9	4617.97	5024.79	8696.29	9001.15	13.9	9.2	6.2	92.9	117.5	18.8	30.7	245.6	253	16.5	18	32.4	35.4
900	2	B5XJ61	30S ribosomal protein S11 OS=Streptococcus pyogenes serotype M49 (strain NZ131) OX=471876 GN=rpsK PE=3	GPGSGRESAIRALAA	S	93	M L	yes	568.908	417.175	223.16	8520.9	5301.01	573.524	547.464	7305.27	11960.2	563.504	815.545	15734.5	13479	7.7	5.5	2.9	110	83	8.9	8.2	103.8	209.7	8.5	12	258.1	211.4
687	1	A0A0H3BZY3	3-oxoacyl-[acyl-carrier-protein] synthase 2 OS=Streptococcus pyogenes serotype M49 (strain NZ131) OX=471876 GN=fabF PE=3	GPITKFDTTDYAVKN	T	43	M P	yes	8537.56	5937.12	7456.05	6478.48	7713.54	7043.7	8254.85	7083.79	6550.17	6374.53	5290.18	5456.48	4107.68	271.2	192	208.2	199.2	275.2	219.3	188.6	169.8	176.2	249	234	251.9	199.5
15081	1	A0A0H3BY93	Putative pore-forming peptide OS=Streptococcus pyogenes serotype M49 (strain NZ131) OX=471876 GN=Spy49_0625 PE=4	GPRKLLISAITKIEV	S	90	M	yes	2.15523	0	0	420.097	1129.12	0	3.48288	2.08012	35.2617	3.96709	5.81033	187.808	352.779	4.7	0	0	931	1870.9	0	4.3	6.3	63.8	8.5	11.3	323.1	561.5
11235	1	A0A0H3BYN9	Putative esterase OS=Streptococcus pyogenes serotype M49 (strain NZ131) OX=471876 GN=Spy49_1033c PE=4	GQKRSFSSWLVEKMF	S	29	M	yes	0.166401	0	0	662.429	2854.75	0	0	24.1071	19.3614	4.87459	13.7529	259.379	1231.85	0.1	0	0	269.4	955.4	0	0	8.1	9.1	2.8	8.4	147.4	674.7
3764	2	B5XLJ2	Serine hydroxymethyltransferase OS=Streptococcus pyogenes serotype M49 (strain NZ131) OX=471876 GN=glyA PE=3	GSVLTNKYAEGYPGN	Y	55	M	yes	991.886	1164.98	947.254	1591.99	1009.35	1957.34	1972.82	7100.5	7166.12	834.37	1215.77	2539.75	3317.81	352.3	475.8	353	486.2	333.3	808.5	706.9	2337.7	2887.3	344.7	530.4	1142.9	1580.3
3640	1	A0A0H3BWQ8	Ribulose-phosphate 3-epimerase OS=Streptococcus pyogenes serotype M49 (strain NZ131) OX=471876 GN=rpe PE=3	GSYLFKASDLVSQVQ	S	205	M L	yes	327.716	107.441	66.5119	1903.24	5634.16	279.509	583.457	2220.49	4551.81	370.056	489.014	2584.25	5737.48	66.9	22.5	15.2	338	1085.5	52.5	83.3	225.3	508	77.3	99.1	495.3	1025
11362	1	A0A0H3C114	Inosine-5'-monophosphate dehydrogenase OS=Streptococcus pyogenes serotype M49 (strain NZ131) OX=471876 GN=guaB PE=3	GVIHKNMSITEQAEE	S	79	P	yes	137.307	77.4269	73.7862	955.544	1738.23	209.278	213.593	360.829	530.09	145.252	179.399	512.296	830.554	2.3	1.6	1.5	19.9	37.6	4.4	5.5	9.6	13.9	2.7	3.2	9.1	14.8
3573	1	B5XIW7	Chaperonin GroEL OS=Streptococcus pyogenes serotype M49 (strain NZ131) OX=471876 GN=groEL PE=3	GVITIEESRGMETEL	S	178	P	yes	988.978	920.624	555.947	1063.13	1766.89	1179.91	1434.75	7083.16	6398.49	866.16	987.055	1044.32	1015.62	4	4.5	3	5.8	9.6	5.4	8.8	33.8	36.8	3.9	4.2	4.7	4.6
1257	1	A0A0H3BZJ0	Formate acetyltransferase OS=Streptococcus pyogenes serotype M49 (strain NZ131) OX=471876 GN=pfl PE=3	GWLQNLNSLAKLEFS	S	662	M P L	yes	218.105	250.12	59.3646	20223.4	33617.4	159.014	323.755	1819.42	2173.65	718.859	928.79	6237.25	9439.51	5.9	9.5	1.1	219.5	392.2	4.5	8.4	57.1	74.1	27.3	39.8	287.7	451.6
3956	2	A0A0H3BYY9	Superoxide dismutase OS=Streptococcus pyogenes serotype M49 (strain NZ131) OX=471876 GN=sodM PE=3	HHDKHHATYVANTNA	T	34	M P L	yes	384.442	28.6369	2.25202	1010.29	1390.15	275.945	602.843	3634.64	5053.27	550.579	791.161	3721.21	7147.3	27.9	2.1	0.2	74.6	95.9	17.7	49.6	218.7	260.7	45.9	54.1	215	408.7
9192	1	B5XKM5	Septation ring formation regulator EzrA OS=Streptococcus pyogenes serotype M49 (strain NZ131) OX=471876 GN=ezrA PE=3	HIQERIDSLYEVFER	S	296	M P L	yes	6.23739	6.59973	0.94889	897.954	3019.36	1.81356	29.0433	344.208	474.868	22.1553	18.2327	916.517	2066.61	0.6	0.7	0.1	88.9	279.6	0.2	3	33.6	44.9	2.2	1.8	88.4	203.1
6601	2	B5XHV3	Translation initiation factor IF-2 OS=Streptococcus pyogenes serotype M49 (strain NZ131) OX=471876 GN=infB PE=3	HREAALKSIEEAETK	S	273	P	yes	213.236	43.1665	4.26416	1338.23	1430.95	153.381	1628.79	4603.67	2234.29	269.526	404.864	2352.88	4671.17	12.2	2.7	0.3	92.2	107.6	10.2	117.7	286.8	156.6	16.2	24.1	148.5	276.1
6157	1	A0A0H3C0F1	Teichoic acid D-alanyltransferase OS=Streptococcus pyogenes serotype M49 (strain NZ131) OX=471876 GN=dltB PE=3	HRKKKGLSPLFQSRA	S	377	M	yes	95.5064	87.1073	8.72965	1366.18	4128.09	115.564	145.206	281.662	422.731	199	277.42	1547.61	3689.55	41.1	49	4.8	717.5	1856.9	63	67.6	113.9	158.7	96.5	134.6	750.5	1775.9
1828	1	A0A0H3C002	Uncharacterized protein OS=Streptococcus pyogenes serotype M49 (strain NZ131) OX=471876 GN=Spy49_1390c PE=4	HRLMDSDTIETPRSY	T	308	M P	yes	4715.71	3683.05	2669.87	3304.91	3703.49	4756.94	5405.43	4590.41	3656.96	5107.12	4800.11	4533.51	4228.15	1652.9	1139.5	755.6	856.6	979.1	1595.9	1745.4	1215.6	1263.5	1826.7	1919.3	1777.7	1828.9
578	2	A0A0H3BZ43	Uncharacterized protein OS=Streptococcus pyogenes serotype M49 (strain NZ131) OX=471876 GN=Spy49_1003c PE=3	HVPTIYDSIKSIVEE	S	96	M L	yes	3201.14	1421.69	558.837	20070.3	34585.1	2249.18	2313.44	11578.6	25579.1	4090.03	4744.23	13247	19317.8	82.6	39.2	15.9	447.5	762.4	60.3	96.9	372.9	821.7	110.9	126	369.5	549.3
1958	2	B5XJR1	Elongation factor G OS=Streptococcus pyogenes serotype M49 (strain NZ131) OX=471876 GN=fusA PE=3	HYEDVPKSVQEEIIK	S	680	M P L	yes	592.191	596.373	420.305	2555.31	4988.73	955.503	1592.99	7714.01	9605.9	614.688	783.701	3596.19	6303.27	5.4	4.9	3.6	22	48.8	9.1	13.7	45.8	78.3	5.7	7.4	33.9	60.8
1278	1	A0A0H3BYE4	Signal recognition particle protein OS=Streptococcus pyogenes serotype M49 (strain NZ131) OX=471876 GN=ffh PE=3	IAAGSGNSFVEVNKF	S	409	M P	yes	3936.41	2765.66	1421.7	6922.69	10240.3	3684.91	3929.82	5793.94	8154.32	3931.36	3795.67	10052.2	11540.7	185.2	132.3	72.5	356.5	547.7	187.7	219.8	284	474.1	197.7	195.9	537.6	625.7
3033	1	A0A0H3BYR8	Ribosomal_L12_N domain-containing protein OS=Streptococcus pyogenes serotype M49 (strain NZ131) OX=471876 GN=Spy49_0847 PE=3	IAEIKEASILELNDL	S	16	M P L	yes	432.835	319.453	202.94	2437.43	4990.21	382.267	480.44	2045.26	2193.54	386.404	498.692	1924.46	4744.93	1.9	1.8	1.1	15.2	34.6	2.3	2.9	12	13.4	1.9	2.6	10.6	25.9
1119	1	A0A0H3BYQ3	30S ribosomal protein S3 OS=Streptococcus pyogenes serotype M49 (strain NZ131) OX=471876 GN=rpsC PE=3	IARAEGYSEGTVPLH	S	159	M P L	yes	856.463	612.737	283.17	1925.22	4406.92	939.39	1601.12	6845.97	10086.2	1267.55	3570.06	16965.7	20000	8.8	6.3	3	21.1	49.1	11.2	18.3	74.8	116.6	13.6	37.6	174.7	198.6
7829	1	B5XJU2	Probable transcriptional regulatory protein Spy49_0265 OS=Streptococcus pyogenes serotype M49 (strain NZ131) OX=471876 GN=Spy49_0265 PE=3	IDKAKGNTDETFVEG	T	75	M P	yes	280.036	249.806	157.996	1062.07	2087.77	335.773	235.496	1155.36	1102.25	312.385	343.8	901.333	1199.15	15.7	13.2	8.9	60.2	124	18.1	14.3	54.3	63.9	16.7	18	52.8	65.4
2976	1	A0A0H3BYB9	Tagatose-6-phosphate kinase OS=Streptococcus pyogenes serotype M49 (strain NZ131) OX=471876 GN=fruK PE=3	IDQINLGSVNRMASD	S	24	M P	yes	481.415	417.824	262.646	2473.18	3711.59	752.689	1193.72	4816.26	6229.76	808.512	892.257	2400.85	2635.06	46.7	57	29.8	355	504.2	57.5	72.2	335.5	431	82	90.2	238.2	266.5
29	5	A0A0H3BY55	Non-specific serine/threonine protein kinase OS=Streptococcus pyogenes serotype M49 (strain NZ131) OX=471876 GN=Spy49_1257c PE=4	IFEDVESTKPLPKVA	T	291	M P L	yes	401808	101148	161183	50938.5	35278.6	177609	367086	576097	546788	178046	123911	73694.8	68187.6	36745.5	8265	15281	4430.4	2960.5	16101.9	34950.5	46826	70983.4	17164.1	11603.6	7433	7053.5
9205	5	A0A0H3BZX9	PTS system, mannose-specific IIC component OS=Streptococcus pyogenes serotype M49 (strain NZ131) OX=471876 GN=manM PE=4	IGDILEDY-------	Y	269	P	yes	9164.09	4812.91	7258.02	14230.5	17621.6	4324.76	2700.62	5703.05	2164.26	3409.97	3623.6	3754.01	3705.69	1061.5	659.9	627.7	1316.9	1592.9	452.5	151	492.4	145.2	322.5	354	370.3	346.7
3238	2	A0A0H3BY81	Putative L-malate permease OS=Streptococcus pyogenes serotype M49 (strain NZ131) OX=471876 GN=malP PE=3	IGHSEDMSDALKDNS	S	257	M L	yes	425.44	466.773	207.07	5052.48	11643	314.725	192.194	108.049	83.5571	613.806	739.103	1276.07	2174.61	2007.1	3145.8	2551.6	3447.8	6260.6	1584.3	2469.9	2096.3	1595	2217.9	2492.1	4998.5	8377.5
2568	1	A0A0H3C114	Inosine-5'-monophosphate dehydrogenase OS=Streptococcus pyogenes serotype M49 (strain NZ131) OX=471876 GN=guaB PE=3	IGPGSICTTRVVAGV	T	311	M P L	yes	459.681	551.667	285.307	4100.67	10017.9	1174.81	1879.62	4859.92	5933.95	823.094	1233.37	8129.18	11846.6	7.7	11.4	5.8	85.4	216.7	24.7	48.4	129.3	155.6	15.3	22	144.4	211.1
4460	1	A0A0H3C114	Inosine-5'-monophosphate dehydrogenase OS=Streptococcus pyogenes serotype M49 (strain NZ131) OX=471876 GN=guaB PE=3	IHKNMSITEQAEEVR	T	81	P L	yes	143.277	179.05	73.7862	2208.79	4951.18	242.572	248.544	1195.25	1590.27	328.162	482.136	2212.44	2940.61	2.4	3.7	1.5	46	107.1	5.1	6.4	31.8	41.7	6.1	8.6	39.3	52.4
4567	2	A0A0H3BYE2	Putative glutamyl-aminopeptidase OS=Streptococcus pyogenes serotype M49 (strain NZ131) OX=471876 GN=pepA PE=3	IIKKLDRSTVDLIKR	S	347	M	yes	181.998	171.794	80.4858	2647.94	6116.32	262.974	176.959	1162.68	2269.55	196.254	335.031	1754.76	3859.97	34	31.8	16.7	465.6	1137.3	48.7	30.6	157.2	261.7	34.8	53.7	295.9	661.4
1476	1	A0A0H3BXP9	Putative rhamnosyltransferase OS=Streptococcus pyogenes serotype M49 (strain NZ131) OX=471876 GN=rgpAc PE=4	IKEFMASSTKRDLVI	S	236	M L	yes	794.721	1139.03	594.355	5431.85	5103.8	1925.91	1557.86	2406.54	3234.78	2087.24	2738.75	7932.36	9797.09	1190.8	1454.5	877.7	6756.4	6190.1	2666.6	1797.1	1448.8	2247.1	2774.1	3577.1	7467.1	7677.5
1286	1	B5XJR1	Elongation factor G OS=Streptococcus pyogenes serotype M49 (strain NZ131) OX=471876 GN=fusA PE=3	ILQMHANSRQEIETV	S	361	M P	yes	2083.63	2726.28	1389.34	6516.03	9323.2	8295.02	9778.85	9566.72	14525.4	1822.5	2118.11	9101.85	14773.3	19	22.4	11.9	56.1	91.2	79	84.1	56.8	118.4	16.9	20	85.8	142.5
3870	1	A0A0H3BZ85	Putative endopeptidase Clp ATP-binding chain C OS=Streptococcus pyogenes serotype M49 (strain NZ131) OX=471876 GN=clpC PE=3	ILSRELTSGHTLKIG	S	796	M	yes	72.5224	113.727	31.6328	1208.09	1444.55	228.498	167.486	882.156	841.011	516.976	894.284	1599.54	1706.74	9	14.6	4.4	167.4	202.9	28.2	19.1	102.2	122.9	71.7	126.2	234.1	243
2710	1	B5XJR0	30S ribosomal protein S7 OS=Streptococcus pyogenes serotype M49 (strain NZ131) OX=471876 GN=rpsG PE=3	IMDAANNTGASVKKR	T	131	M P	yes	268.652	284.134	215.967	2240.57	4105.23	414.147	748.774	5494.02	6273.99	510.312	663.26	5728.3	6898.2	2	2.5	1.9	22	43.8	4	7.7	55.7	71.4	4.4	6.2	61	77.6
4621	1	B5XL08	Phosphopentomutase OS=Streptococcus pyogenes serotype M49 (strain NZ131) OX=471876 GN=deoB PE=3	INDIFNGSGITNDMG	S	257	P	yes	462.301	93.145	26.7902	7852.84	11297.6	126.731	373.05	1591.68	2177.46	906.275	1072.13	3344.53	3623.05	28.2	5.7	1.5	240.2	322.9	6.3	18.2	68.3	108.6	58.1	70.4	218.5	250.1
546	2	A0A0H3BY55	Non-specific serine/threonine protein kinase OS=Streptococcus pyogenes serotype M49 (strain NZ131) OX=471876 GN=Spy49_1257c PE=4	IQNHAPLSNNEVVRI	S	109	M P L	yes	6209.92	3392.41	1511.52	28349.4	27049.1	6075.5	6157.92	27270.7	25809.1	10040.2	10860.2	22085.7	22340.9	567.9	277.2	143.3	2465.7	2269.9	550.8	586.3	2216.6	3350.5	967.9	1017	2227.6	2311
724	4	B5XJ39	50S ribosomal protein L2 OS=Streptococcus pyogenes serotype M49 (strain NZ131) OX=471876 GN=rplB PE=3	IRPTVRGSVMNPNDH	S	223	M P L	yes	957.057	460.627	153.082	2603.21	666.078	772.132	1138.24	4332.65	10196.1	2292.08	5793.8	57975.4	90846.3	6.9	3.6	1.2	21.9	6.3	6.9	10.1	32.9	94.7	17.1	46	502.8	798.2
2008	2	A0A0H3BWH3	Putative calcium-transporting ATPase OS=Streptococcus pyogenes serotype M49 (strain NZ131) OX=471876 GN=pacL PE=4	IRRDGHVTEIDSKEL	T	134	M P L	yes	796.419	686.083	476.053	7539.16	7738.18	1808.78	1022.28	2054.58	2008.13	1014.16	1312.6	4295.34	6817	63.3	47.3	35	511.2	652.2	142.2	75.8	123.3	136.5	89.3	123.6	394.6	665.3
279	3	B5XJ60	30S ribosomal protein S13 OS=Streptococcus pyogenes serotype M49 (strain NZ131) OX=471876 GN=rpsM PE=3	IRVKDLTSDQEDAIR	S	50	M P L	yes	5948.52	5399.28	3464.66	34511.3	53328.9	7826.99	9489.06	38056.6	45840.3	6496.17	9010	34430.1	44981	189.9	137.6	86.3	966.1	1747.6	223.2	248.4	1052.3	1480.7	205.8	284.5	1188.9	1447.7
1856	2	A0A0H3BZC7	EIIAB-Man OS=Streptococcus pyogenes serotype M49 (strain NZ131) OX=471876 GN=manL PE=4	ISKLIEASKDPRFGN	S	236	M	yes	968.386	668.471	548.043	3252.21	5027.28	874.489	970.7	9863.83	16505.2	853.697	908.429	2650.22	7256.7	25.1	22.6	13.4	90.1	168.8	27	20.9	191.4	336.7	23.2	25.3	82.5	248.9
646	1	A0A0H3C0R9	Phosphopantothenoylcysteine synthetase OS=Streptococcus pyogenes serotype M49 (strain NZ131) OX=471876 GN=dpfB PE=4	ISNNEVASADTKEAI	S	211	M L	yes	7132	5835.07	3701.86	40417.4	39728	7087.98	5478.77	27217.8	25371.4	7197.03	8619.45	24311.6	21506.7	1945.9	1150.8	848.5	8011.3	9265.7	1663.2	1223.3	4145.8	4529.4	2041.9	2466.5	5380	4242.6
1987	2	A0A0H3BZ76	Putative phosphoprotein phosphatase (PppL protein) OS=Streptococcus pyogenes serotype M49 (strain NZ131) OX=471876 GN=pppL PE=4	ITEEEAASHPQRNII	S	155	M P L	yes	726.524	423.051	217.935	5405.6	2173.1	1171.77	945.452	6621.12	7006.3	1943.16	2581.76	7409.19	11458.3	35.2	22.3	12.5	379.2	164.8	65.3	57.3	408.9	428	95.6	127.4	383.1	607.3
976	1	B5XMC3	Arginine deiminase OS=Streptococcus pyogenes serotype M49 (strain NZ131) OX=471876 GN=arcA PE=3	ITNAILESKGLKLIK	S	379	M P L	yes	1706.67	950.795	459.642	8193.6	18091.1	1844.08	2101.98	2155.52	2616.2	2323.99	3188.64	14439.8	21056.3	19.1	12.7	4.9	32.8	74.1	21.9	48.4	60.3	69.2	25.9	38.9	181	261.6
664	2	B5XK64	Ribosome-recycling factor OS=Streptococcus pyogenes serotype M49 (strain NZ131) OX=471876 GN=frr PE=3	ITPANDGSVIRLVIP	S	96	M P L	yes	3076.77	2345.68	1090.35	25919.5	66818.9	4162.71	3323.29	23198.4	30113.8	4417.38	5656.64	35712	59880.1	83.1	78.2	36.9	868.3	2471.4	137.5	112.4	717	885.9	140.3	177.5	1081.5	2074.7
838	1	A0A0H3BVE1	30S ribosomal protein S5 OS=Streptococcus pyogenes serotype M49 (strain NZ131) OX=471876 GN=rpsE PE=3	ITSKSLGSNTPINIV	S	129	M P L	yes	960.521	667.722	321.646	4280.3	12061.1	521.407	770.406	9603.03	16228.9	666.271	975.645	17645.7	27830.1	9.9	5.8	2.9	40.6	132.8	5.6	8.6	94.4	213.7	7.3	11.4	217.6	335.2
4520	2	A0A0H3BXI0	Uncharacterized protein OS=Streptococcus pyogenes serotype M49 (strain NZ131) OX=471876 GN=Spy49_1001c PE=3	IVSQNVDSMTHLKVV	S	96	P	yes	353.218	77.7847	24.0059	2307.55	6161.27	210.444	213.589	2325.04	4902.92	485.157	606.419	2947.58	5177.35	10.6	2.4	0.8	57.7	150.3	7.1	12.6	78.9	156.3	14.2	18.8	91	166.1
605	2	B5XJ55	50S ribosomal protein L15 OS=Streptococcus pyogenes serotype M49 (strain NZ131) OX=471876 GN=rplO PE=3	KAAKFSKSAEAAIIA	S	131	M P L	yes	2867.06	2637.34	1692.89	16879.2	29061.2	3587.38	2912.59	9362.1	13426.7	3089.97	3709.77	24697.8	42990.2	47.8	41.9	28.2	291.5	669.8	70.7	60	147	316.8	55.7	69.4	709.3	1521.2
667	1	B5XHX4	Serine--tRNA ligase OS=Streptococcus pyogenes serotype M49 (strain NZ131) OX=471876 GN=serS PE=3	KAERNIASAAIAQAK	S	56	M P L	yes	696.238	555.245	306.775	4365.75	7092.94	990.806	1148.63	18862.9	17475.8	961.568	1298.04	14047.2	29604.8	64.9	53.9	28.3	293.6	479.4	91.5	107.5	821.3	914.4	91.2	128.7	1413.1	3256.6
1256	1	B5XLR6	30S ribosomal protein S20 OS=Streptococcus pyogenes serotype M49 (strain NZ131) OX=471876 GN=rpsT PE=3	KAFEANPSEELFRAA	S	40	M P L	yes	388.7	290.8	215.2	6722.2	12463.9	352.3	607.2	7393.6	12484.4	512.5	898.8	19491.3	23695.3	388.7	290.8	215.2	6722.2	12463.9	352.3	607.2	7393.6	12484.4	512.5	898.8	19491.3	23695.3
93	2	B5XIW7	Chaperonin GroEL OS=Streptococcus pyogenes serotype M49 (strain NZ131) OX=471876 GN=groEL PE=3	KAIAQPVSGKEAIAQ	S	138	M P L	yes	29521	25716.1	18253.6	93060.6	143541	30262.6	23852.8	49938.3	61794.1	32780.8	43007.4	103144	157465	119.4	125.7	98.5	507.7	779.9	138.5	146.3	238.3	355.4	147.6	183	464.2	713.2
1759	2	B5XJR1	Elongation factor G OS=Streptococcus pyogenes serotype M49 (strain NZ131) OX=471876 GN=fusA PE=3	KAKLYDGSYHDVDSS	S	569	M P L	yes	1151.48	535.519	268.528	10430.3	20404.7	1134	1511.59	19689.2	25431.7	1509.76	1789.8	9239.76	26633.4	10.5	4.4	2.3	89.8	199.6	10.8	13	116.9	207.3	14	16.9	87.1	256.9
368	2	A0A0H3BZC7	EIIAB-Man OS=Streptococcus pyogenes serotype M49 (strain NZ131) OX=471876 GN=manL PE=4	KANVVPISKLIEASK	S	230	M L	yes	6323.45	4945.5	5091.9	24382.6	28716.2	6221.83	5870.65	25767.6	35196.6	6457.92	6610.34	14799.5	27411.6	163.9	167.2	124.5	675.5	964.2	192.1	126.4	500	718	175.5	184.1	460.7	940.2
1528	1	A0A0H3BX27	Dihydrolipoyl dehydrogenase OS=Streptococcus pyogenes serotype M49 (strain NZ131) OX=471876 GN=acoL PE=3	KAPAQAASAAPKAAL	S	118	M P	yes	998.042	983.094	765.673	3561.55	919.661	1909.29	2062.67	5665.85	7810.31	1778.62	2822.61	4551.43	6008.17	40.4	40.6	32.4	153.3	42.3	65.1	59.5	165.2	232.8	79.9	131	209	289
1839	1	B5XLI1	GMP reductase OS=Streptococcus pyogenes serotype M49 (strain NZ131) OX=471876 GN=guaC PE=3	KCIITSRSQADTSVT	S	26	M P L	yes	505.613	488.782	265.572	3255.15	5960.88	717.363	754.297	3201.83	4862.81	770.552	926.647	6441.67	11920.4	154.4	139.8	132.4	2003.7	3680	226.2	408.5	1518.6	2602.9	207.4	248	1709.2	3022.6
2839	1	A0A0H3C1P7	Transcription termination/antitermination protein NusA OS=Streptococcus pyogenes serotype M49 (strain NZ131) OX=471876 GN=nusA PE=3	KDALAISSAYELGDK	S	85	M P L	yes	1341.27	1029.27	572.045	4751.43	8703.04	990.228	1644.23	2983.21	2528.43	1227.13	1551.7	4586.99	4688.23	178.6	123	70.2	623.6	1151.7	133.8	195.2	409.2	379	161.1	208.4	636.8	684.8
3922	1	A0A0H3BYG7	Putative toxic anion resistance protein OS=Streptococcus pyogenes serotype M49 (strain NZ131) OX=471876 GN=Spy49_0138c PE=3	KDLKTKDSATPDYQI	S	222	M P	yes	290.761	247.883	122.291	3539.27	5221.99	408.253	435.973	2044.46	3180.36	479.012	453.623	2069.72	4424.42	69.6	58.8	29.4	703.7	948.2	91	96	404.1	511.1	126	119.2	511.8	1145.7
2162	2	A0A0H3BWH3	Putative calcium-transporting ATPase OS=Streptococcus pyogenes serotype M49 (strain NZ131) OX=471876 GN=pacL PE=4	KDLSTAVSKDAGIGD	S	190	M P	yes	937.334	646.919	529.099	10429.8	12552.9	1115.54	2559.74	9634.72	14804.3	1231.07	1522.87	6788.07	10124.6	74.5	44.6	38.9	707.2	1058	87.7	189.8	578.2	1006.3	108.4	143.4	623.6	988.1
1964	4	B5XJ47	50S ribosomal protein L24 OS=Streptococcus pyogenes serotype M49 (strain NZ131) OX=471876 GN=rplX PE=3	KEAPIHVSNVQVLDK	S	66	M P L	yes	886.48	927.763	695.985	3741.31	4794.28	697.672	1170.38	3389.29	5832.58	716.774	928.65	30510.8	50099.2	16.8	18.3	14.2	89.1	143.2	16.4	30.2	84.8	183.4	15.9	22.8	1428.1	5069.2
2599	2	A0A0H3BXI0	Uncharacterized protein OS=Streptococcus pyogenes serotype M49 (strain NZ131) OX=471876 GN=Spy49_1001c PE=3	KEEHEAASVTVQDRV	S	122	M P L	yes	356.55	84.2667	27.0066	1271.75	787.069	551.303	639.072	3394.74	5533.43	1889.38	3083.71	5240.86	6695.33	10.7	2.6	0.9	31.8	19.2	18.6	37.7	115.2	176.4	55.3	95.6	161.8	214.8
927	3	A0A0H3C1S0	CsbD domain-containing protein OS=Streptococcus pyogenes serotype M49 (strain NZ131) OX=471876 GN=Spy49_1665c PE=3	KEGAGKLTGDKELEA	T	25	M P L	yes	4309.86	2348.81	1443.22	9769.63	3486.54	6932.57	7722.09	20941.9	18208.3	10218.1	14095	17800.8	7837.19	3142.2	2139.3	2086.8	15437.1	5060.4	6299.8	10407.8	11167.2	19009.3	10600.9	13454.9	25762.2	23629
5223	1	A0A0H3BX54	Xaa-His dipeptidase OS=Streptococcus pyogenes serotype M49 (strain NZ131) OX=471876 GN=Spy49_0844 PE=4	KELGLPVSKKVRFIV	S	142	M	yes	235.109	161.963	85.1215	1875.86	4705.62	309.658	243.161	826.511	1020.77	274.043	402.767	1469.32	2018.12	11.9	7.3	3.8	73.1	195.3	12.5	11.7	36.9	53.6	13.7	18.9	74.1	106.1
7416	1	A0A0H3BZK3	Glucokinase OS=Streptococcus pyogenes serotype M49 (strain NZ131) OX=471876 GN=Spy49_1181c PE=3	KETQEVGSVVEKELG	S	99	P	yes	95.2103	80.3052	30.5442	2065	3283.03	139.356	44.3692	680.322	1272.03	115.986	201.368	668.233	1036.77	8.9	7.4	2.9	192	292.8	12.7	3.9	72.1	142.8	11.8	20.4	61	92
6204	2	A0A0H3BZD6	Putative PTS system enzyme II OS=Streptococcus pyogenes serotype M49 (strain NZ131) OX=471876 GN=Spy49_1737c PE=4	KFEQDAKSLLTAIGG	S	10	M	yes	249.952	149.897	94.3028	1649.09	3197.9	181.399	156.397	290.681	284.468	266.876	306.035	1000.94	2147.5	22	21.1	7.5	97.9	197.7	23.4	43.8	110.9	120.7	25	31.2	107.6	242.1
2858	2	A0A0H3C1K3	Thioredoxin reductase OS=Streptococcus pyogenes serotype M49 (strain NZ131) OX=471876 GN=nox2 PE=3	KFNVENIYGIVQKIE	Y	76	M L	yes	843.27	550.944	319.079	4250.61	6781.3	504.337	527.045	1395.3	1449.53	922.021	1537.03	5063.46	8195.08	89.8	59.5	38.8	556.6	929.6	58.2	68.2	152	158.3	112.5	188.2	640.7	967.9
1517	1	A0A0H3BXY9	Isoleucine--tRNA ligase OS=Streptococcus pyogenes serotype M49 (strain NZ131) OX=471876 GN=ileS PE=3	KGEKMSKSKGNIISP	S	584	M P	yes	1557.18	903.441	495.838	5767.9	5242.13	1756.74	3842.22	19896.8	17544.7	1976.84	2022.98	4120.69	5716.94	98.4	70.5	35.5	427	364.5	134.1	237.4	954.9	849.7	131	138	273.7	394.1
1351	4	B5XKI1	Elongation factor Tu OS=Streptococcus pyogenes serotype M49 (strain NZ131) OX=471876 GN=tuf PE=3	KGEVYILSKDEGGRH	S	317	M P L	yes	2892.08	1158.27	538.171	23384.3	32618.6	1990.1	3902.73	21794.4	29423.1	3398.02	3714.99	15370.4	41120	7.6	3.7	1.6	64.6	90.1	6	10.4	51.9	72.6	9.3	9.8	40	108.2
3891	2	A0A0H3BYT6	Non-phosphorylating glyceraldehyde-3-phosphate dehydrogenase (NADP) OS=Streptococcus pyogenes serotype M49 (strain NZ131) OX=471876 GN=gapN PE=4	KGHKAAVSEVIRTAE	S	99	M	yes	334.073	215.587	146.408	949.407	1842.07	456.541	683.42	4521.42	6096.36	305.858	376.381	985.053	1290.65	7.1	4.6	3.1	18.4	37.7	9.7	13.4	62.6	94.1	7.4	9.1	22.1	29.3
6045	2	B5XJR1	Elongation factor G OS=Streptococcus pyogenes serotype M49 (strain NZ131) OX=471876 GN=fusA PE=3	KIGADFLYSVQTLHD	Y	146	P	yes	65.799	24.3418	0	1509.95	3700.66	0	116.276	2054.82	2122.38	161.76	137.677	1845.83	3628.53	0.6	0.2	0	13	36.2	0	1	12.2	17.3	1.5	1.3	17.4	35
3466	2	B5XL08	Phosphopentomutase OS=Streptococcus pyogenes serotype M49 (strain NZ131) OX=471876 GN=deoB PE=3	KIGLGNISRPIPLKT	S	62	M P L	yes	895.094	400.36	83.9425	6914.55	17714.4	245.415	801.443	2707.96	3079.72	1024.82	1408.7	4054.76	5115.14	54.6	24.5	4.7	211.5	506.3	12.2	39.1	116.2	153.6	65.7	92.5	264.9	353.1
1360	2	A0A0H3C1B0	Uncharacterized protein OS=Streptococcus pyogenes serotype M49 (strain NZ131) OX=471876 GN=Spy49_1166 PE=4	KIVIPGQSKTLHTNN	S	83	M	yes	1286.45	1052.04	685.5	4827.93	6670.46	1769.05	1228.71	5200.45	6303.84	2339.72	3448.04	7893.13	8338.75	152	123.6	87.7	493	657	196.7	155.7	424.3	595.1	288.5	439.5	999.9	1111.6
4296	2	B5XLJ8	L-lactate dehydrogenase OS=Streptococcus pyogenes serotype M49 (strain NZ131) OX=471876 GN=ldh PE=3	KIYAADYSDCHDADL	S	70	P	yes	423.483	94.324	0	6233.48	10321	27.901	683.2	4448.83	6864.07	926.019	1005.25	6968.02	11630.5	5.4	1.2	0	90.7	168.4	0.4	8.4	45.9	81.9	12.3	14.3	104	176.6
1290	2	A0A0H3C2S7	Uncharacterized protein OS=Streptococcus pyogenes serotype M49 (strain NZ131) OX=471876 GN=Spy49_1801c PE=4	KKDSDIKSVTEIVEE	S	87	M P L	yes	1065.07	272.485	172.586	12810.7	5383.96	515.944	1562.02	4878.02	3624.9	2442.2	2271.96	13400.3	23591	229.3	53.5	34.3	2622.7	1175.8	104.9	241.2	692.5	693.6	612.7	589.7	3572.2	6754.6
777	2	B5XJ47	50S ribosomal protein L24 OS=Streptococcus pyogenes serotype M49 (strain NZ131) OX=471876 GN=rplX PE=3	KKHQKPNTENPQGAI	T	49	M P L	yes	2411.44	760.462	274.473	7352.44	2999.77	2663.07	4933.44	24596.3	18938.4	4120.32	4696.2	18474	12226.3	45.7	15	5.6	175.1	89.6	62.6	127.3	615.4	595.5	91.4	115.3	864.7	1237.1
31007	1	B5XHV3	Translation initiation factor IF-2 OS=Streptococcus pyogenes serotype M49 (strain NZ131) OX=471876 GN=infB PE=3	KKIISSFSKASKPDV	S	51	M	yes	0	0	0	29.0289	43.8862	0	0	33.7089	51.363	0	6.71973	117.248	209.788	0	0	0	2	3.3	0	0	2.1	3.6	0	0.4	7.4	12.4
890	2	A0A0H3BZL9	PTS system, fructose-specific IIABC component OS=Streptococcus pyogenes serotype M49 (strain NZ131) OX=471876 GN=fruA PE=4	KKSQELISLILNNEG	S	257	M P L	yes	857.42	1346.33	389.454	28904.1	34922.2	911.198	4347.57	6200.29	5738.29	2260.38	2502.75	37623.4	31806.8	14.3	30.4	8.1	664	831.4	13.7	61.2	98.9	91.3	41.8	46.9	744.7	643.3
416	3	A0A0H3BY05	Carbamate kinase OS=Streptococcus pyogenes serotype M49 (strain NZ131) OX=471876 GN=arcC PE=3	KLEEVTVSQMKEYIT	S	258	M P L	yes	5007.01	3992.03	1875.95	41398.6	79274	6362.15	2956.6	5740	6524.87	5983.58	6988.18	13263.6	18117.9	190.2	138.6	56.8	311.9	643.9	216.2	208.4	519.8	565.7	213.1	246.7	472	715.1
1821	2	B5XJ40	30S ribosomal protein S19 OS=Streptococcus pyogenes serotype M49 (strain NZ131) OX=471876 GN=rpsS PE=3	KLGEFAPTRTYKGHA	T	77	M L	yes	256.622	187.821	223.244	970.582	710.697	178.703	392.083	1126.97	1605.74	264.926	1774.34	19118.8	19809.6	4.4	3.2	4	21	17.9	3.6	8.3	21.9	39.5	5.4	38.8	478	542.1
6363	1	B5XJU2	Probable transcriptional regulatory protein Spy49_0265 OS=Streptococcus pyogenes serotype M49 (strain NZ131) OX=471876 GN=Spy49_0265 PE=3	KLIDALESDDDVQKV	S	224	P L	yes	55.2938	56.7741	7.10095	1893.03	4145.24	113.161	242.083	1374.51	1650.79	102.881	148.98	684.535	1674.05	3.1	3	0.4	107.3	246.2	6.1	14.7	64.6	95.7	5.5	7.8	40.1	91.3
457	2	B5XHZ0	Chaperone protein DnaK OS=Streptococcus pyogenes serotype M49 (strain NZ131) OX=471876 GN=dnaK PE=3	KLIDRNTTIPTSKSQ	T	387	M L	yes	3167.87	2659.95	2063.72	20131.1	30414	4070.5	2886.58	33746.3	43017.5	3448.61	4541.91	15403.2	27068.9	16.6	17.2	12.5	116.5	199.3	24.4	19.4	167.4	258.3	20.2	25.6	94	168.7
1104	1	B5XHX4	Serine--tRNA ligase OS=Streptococcus pyogenes serotype M49 (strain NZ131) OX=471876 GN=serS PE=3	KLKKRGVSEDTLTHL	S	24	M P	yes	981.599	639.717	294.85	7833.38	14348.6	837.042	1149.7	9131.73	15052.4	1074.38	1356.53	3541.87	5837.15	91.5	62.1	27.2	526.8	969.8	77.3	107.6	397.6	787.6	101.9	134.5	356.3	642.1
88	6	A0A0H3BZD6	Putative PTS system enzyme II OS=Streptococcus pyogenes serotype M49 (strain NZ131) OX=471876 GN=Spy49_1737c PE=4	KLPETPVSDAPVATA	S	507	M P L	yes	92727.7	45775.5	26604.7	372537	394163	96474.1	81101.2	113054	97650.6	135120	159047	361575	534421	8161.6	6443.5	2115.9	22116	24367.9	12444.9	22712.9	43132.2	41433.2	12657.6	16214.7	38868.8	60248.4
861	1	A0A0H3C114	Inosine-5'-monophosphate dehydrogenase OS=Streptococcus pyogenes serotype M49 (strain NZ131) OX=471876 GN=guaB PE=3	KLPLVDNSGRLSGLI	S	194	M L	yes	3993.85	3208.38	1824.98	19250.1	16258.9	3971.52	4019.43	9505.59	10273.8	4077.81	5241.83	14090.9	16577.4	66.9	66.3	37.1	400.9	351.7	83.5	103.5	252.9	269.4	75.8	93.5	250.3	295.4
1640	1	A0A0H3C129	3-oxoacyl-[acyl-carrier-protein] reductase OS=Streptococcus pyogenes serotype M49 (strain NZ131) OX=471876 GN=fabG PE=3	KMQEQILSQIPMKRI	S	204	M P L	yes	701.106	505.5	156.848	7033.35	13881.7	934.113	1548.14	6318.98	7811.36	1199.97	1318.45	6366.23	13523.8	22	19.7	5.7	272.7	555.1	31.8	42.9	199.9	254	45	55.5	276.9	591.6
773	2	A0A0H3BZ03	R3H domain protein OS=Streptococcus pyogenes serotype M49 (strain NZ131) OX=471876 GN=Spy49_0209 PE=4	KNAPAVNSADVEPEE	S	84	M P L	yes	2990.85	2589.85	1821.05	22348	30968.8	4942.21	3832.11	5726.36	5037.66	4213.45	5313.43	23257.4	36352.4	106.5	111.3	80.5	1080.2	1694.6	200.9	168.3	346.6	297.3	180.4	228.6	1006	1662.6
5359	2	B5XI61	Xaa-Pro dipeptidyl-peptidase OS=Streptococcus pyogenes serotype M49 (strain NZ131) OX=471876 GN=pepX PE=3	KNDMDALSFFQSEQE	S	68	M P	yes	217.434	214.873	67.9824	3633.34	7431.87	342.583	513.074	808.925	860.898	552.806	746.242	2800.73	2519.28	96.7	81.8	30.3	1253.7	2372.5	148.7	195.9	255	284	267.4	351.2	1037.9	857.9
1879	2	A0A0H3C1S1	Chaperone protein DnaJ OS=Streptococcus pyogenes serotype M49 (strain NZ131) OX=471876 GN=dnaJ PE=3	KPGTAPVTCRKCHGS	T	163	M	yes	556.907	331.002	124.958	7059.47	5764.09	933.589	675.416	4480.56	3858.03	1269.83	1593.06	9238.9	12709.8	41.5	23.9	8.2	422.2	377.2	59	47.3	232.5	260.9	91.3	109.6	675	970.6
502	2	A0A0H3BY55	Non-specific serine/threonine protein kinase OS=Streptococcus pyogenes serotype M49 (strain NZ131) OX=471876 GN=Spy49_1257c PE=4	KPLPKVASGPTASVK	S	299	M P L	yes	7787.82	7110.35	5541.88	13400.3	15143.4	11093.2	9391.8	11582	9597.23	7322.4	9009.57	16391.7	20196.7	712.2	581	525.4	1165.5	1270.8	1005.7	894.2	941.4	1245.9	705.9	843.7	1653.3	2089.2
3316	2	A0A0H3BXC6	Signal recognition particle receptor FtsY OS=Streptococcus pyogenes serotype M49 (strain NZ131) OX=471876 GN=ftsY PE=3	KQAQADASNDSAKEE	S	134	P	yes	422.48	345.682	116.321	7869.85	5323.82	771.872	608.488	2963.22	2005.93	958.997	1214.58	4553.06	8400.53	32.8	29.4	11.2	777.6	541.9	62.5	53.4	238.7	175.6	71.7	90.7	364.4	690.9
4743	1	A0A0H3BX54	Xaa-His dipeptidase OS=Streptococcus pyogenes serotype M49 (strain NZ131) OX=471876 GN=Spy49_0844 PE=4	KQTGLKGYEQVIGGG	Y	411	P	yes	302.283	197.462	89.6015	3505.37	6628.35	349.294	268.101	409.896	382.79	408.064	481.615	1489.15	1947.74	15.3	8.9	4	136.6	275.1	14.1	12.9	18.3	20.1	20.4	22.6	75.1	102.4
4556	1	B5XJD9	Acetate kinase OS=Streptococcus pyogenes serotype M49 (strain NZ131) OX=471876 GN=ackA PE=3	KSGLSGVSGISSDMR	S	278	M P	yes	1476.49	651.151	1503.63	5202.41	8983.32	163.25	89.833	981.12	1984.18	214.507	247.482	447.959	1762.81	67.2	31.7	60.3	176.3	293.6	7	3.2	31.9	65.8	10.3	12.1	22.1	90.8
334	4	A0A0H3C1S0	CsbD domain-containing protein OS=Streptococcus pyogenes serotype M49 (strain NZ131) OX=471876 GN=Spy49_1665c PE=3	KSKIEQASGGLKEGA	S	14	M P L	yes	12324.4	13180.8	9169.07	42516.9	46602.5	21662.9	19627.6	48179.5	36281.7	14936.4	21500.8	53763.3	25854.6	8985.4	12005.1	13257.9	67181.4	67639.4	19685.6	26454	25691.6	37877.7	15495.9	20524.4	77808.8	77951.3
2317	1	A0A0H3BVI6	Putative V-type Na+-ATPase subunit E OS=Streptococcus pyogenes serotype M49 (strain NZ131) OX=471876 GN=ntpE PE=4	KTGQKFSSYDCAELR	S	132	M	yes	998.388	835.785	561.598	10215.5	16631.2	921.164	640.678	460.985	410.979	1008.51	1198.07	1817.61	1925.8	3444.5	3236	1825.3	3365.8	5135.1	3000.1	4456.1	8550	7711.6	2624.9	3379.6	4673.2	5227.3
8745	1	A0A0H3BZ11	Phosphoglucomutase OS=Streptococcus pyogenes serotype M49 (strain NZ131) OX=471876 GN=pgmA PE=3	KTISVTLSGVDGAAE	S	464	P	yes	7.26	3.39687	0	1213.6	2931.53	19.5872	78.8118	239.992	423.193	16.8161	36.2959	354.247	454.334	0.4	0.2	0	60.8	152.8	1	3.6	9.2	17.7	1	2.2	22.5	30.4
6809	1	B5XKM5	Septation ring formation regulator EzrA OS=Streptococcus pyogenes serotype M49 (strain NZ131) OX=471876 GN=ezrA PE=3	KTLTNVESGQMDVFA	S	400	P	yes	44.7013	18.8564	18.9778	3231.22	6172.62	121.508	205.239	236.643	437.852	88.6214	212.715	1249.32	1456.09	4.3	2	2	319.9	571.6	13.4	21.2	23.1	41.4	8.8	21	120.5	143.1
6631	2	B5XLV6	ATP-dependent 6-phosphofructokinase OS=Streptococcus pyogenes serotype M49 (strain NZ131) OX=471876 GN=pfkA PE=3	KVASTIQYDFEHKGK	Y	207	P	yes	83.1285	25.2197	20.5442	1716.4	2603.03	100.093	327.916	3325.51	3698.36	84.3513	76.2416	1318.67	4252.39	1.1	0.4	0.3	31.1	47.6	1.6	4.8	46.9	46.6	1.2	1.1	18.9	61.9
63	6	A0A0H3BZL9	PTS system, fructose-specific IIABC component OS=Streptococcus pyogenes serotype M49 (strain NZ131) OX=471876 GN=fruA PE=4	KVETNGASGVANRLT	S	205	M P L	yes	58910.1	65487.3	46268.1	221534	268936	89743	65575.8	80616.3	80719.4	91945.7	108216	229701	311438	982.5	1478.7	962.3	5089.2	6402.6	1349.3	923.1	1285.9	1284.3	1700.3	2027.9	4546.6	6298.9
2244	1	B5XIW7	Chaperonin GroEL OS=Streptococcus pyogenes serotype M49 (strain NZ131) OX=471876 GN=groEL PE=3	KVGAPTETALKEMKL	T	385	M P	yes	1285.67	1186.58	926.578	2034.61	4362.01	2534.63	2967.33	4882.77	5876.87	1265.93	1410.08	2577.48	4437.81	5.2	5.8	5	11.1	23.7	11.6	18.2	23.3	33.8	5.7	6	11.6	20.1
1264	1	A0A0H3BYM9	Glyceraldehyde-3-phosphate dehydrogenase OS=Streptococcus pyogenes serotype M49 (strain NZ131) OX=471876 GN=plr PE=3	KVMEVDGSQLVKVVS	S	305	M P	yes	980.997	751.102	457.068	2414.32	4465.21	1244.93	2628.85	14398.1	17918.3	1253.15	1451.1	2929.34	3769.99	2.2	1.9	1.1	5.9	11.4	3.2	6.4	24.9	31.2	2.9	3.3	6.3	8
6135	2	A0A0H3C1H3	Fructose-bisphosphate aldolase class II OS=Streptococcus pyogenes serotype M49 (strain NZ131) OX=471876 GN=fba PE=4	KVNVNTESQIAFSNA	S	235	P L	yes	113.476	41.8948	44.4159	2119.19	4432.95	90.522	124.525	1217.99	2037.97	138.627	199.463	1241.38	2262.16	0.8	0.3	0.3	16.2	39.2	0.7	0.9	6.7	12.4	1	1.5	9.7	19.1
1679	1	A0A0H3BXC6	Signal recognition particle receptor FtsY OS=Streptococcus pyogenes serotype M49 (strain NZ131) OX=471876 GN=ftsY PE=3	KVSELSQSTASEPKD	S	107	P	yes	3539.56	2630.24	2625.52	11225.9	9487.37	4734.97	4014.43	7795.99	9305.39	5988.04	7501.73	10631.7	15518.3	274.8	223.7	252.8	1109.2	965.7	383.4	352.3	628	814.6	447.7	560.2	850.9	1276.3
9909	1	A0A0H3C276	Galactose-6-phosphate isomerase subunit LacA OS=Streptococcus pyogenes serotype M49 (strain NZ131) OX=471876 GN=lacA2 PE=3	KYEVVDVSENEVRDF	S	33	M	yes	64.8125	28.7203	67.1885	1879.15	3380.25	10.6101	95.8144	297.328	285.262	6.10196	13.5559	175.839	485.361	6.7	4.3	2.8	66.3	123.3	1.7	31.9	148.5	137.3	0.8	2	29.1	84.3
269	1	A0A0H3BZD9	Protein GrpE OS=Streptococcus pyogenes serotype M49 (strain NZ131) OX=471876 GN=grpE PE=3	LAKAILPSLDNLERA	S	99	M P L	yes	2225.15	1399.03	733.296	53367.9	94110.5	1348.24	2596.32	42136.9	45268.2	2768.14	2709.66	13633.3	15484.8	120.7	76.9	37.3	2380.3	4871.6	73.9	120.9	1544.7	2156.7	158.4	158.7	839	986.8
262	4	B5XKI1	Elongation factor Tu OS=Streptococcus pyogenes serotype M49 (strain NZ131) OX=471876 GN=tuf PE=3	LARRLPTSVNQPKDY	S	43	M P L	yes	36988.2	28487.1	16481.5	150984	171926	45606.4	44093.4	118211	141888	52651.1	67097.3	161158	201609	97.2	91	49	417.1	474.9	137.5	117.5	281.5	350.1	144.1	177	419.4	530.5
1281	1	A0A0H3BXU4	Putative ABC transporter OS=Streptococcus pyogenes serotype M49 (strain NZ131) OX=471876 GN=Spy49_0683 PE=4	LDAWSIESDVKTVLS	S	135	M L	yes	1873.63	1690.32	579.472	8843.38	16985.7	1940.36	2427.11	4960.32	4460.27	2875.27	3393.93	8077.7	7902.84	1169.5	1048.1	397.3	5316.9	9832.9	1369.3	1311	2440.2	2416.4	2010.3	2429.9	6346.2	6627.4
6136	1	B5XJ55	50S ribosomal protein L15 OS=Streptococcus pyogenes serotype M49 (strain NZ131) OX=471876 GN=rplO PE=3	LGFEGGQTPLFRRIP	T	55	M	yes	95.9686	56.6493	48.0252	584.838	1583.66	25.3704	131.066	675.09	2004.68	72.1179	128.292	2618.46	7359.09	1.6	0.9	0.8	10.1	36.5	0.5	2.7	10.6	47.3	1.3	2.4	75.2	260.4
4930	1	A0A0H3BY85	Rhamnosyltransferase OS=Streptococcus pyogenes serotype M49 (strain NZ131) OX=471876 GN=rgpBc PE=4	LIRDDGSTDGTQDII	T	41	M L	yes	150.267	214.486	82.7269	5098.92	7890.47	254.237	86.4871	69.2459	38.5524	248.03	349.764	566.201	507.175	1174.9	1190.3	395.1	27026	36594.1	1808.5	256.1	297.2	133.2	2288.7	3826.3	4544.9	3529.6
4273	2	B5XJ48	50S ribosomal protein L5 OS=Streptococcus pyogenes serotype M49 (strain NZ131) OX=471876 GN=rplE PE=3	LITKAKKSIAGFRLR	S	74	M	yes	161.109	227.195	255.513	889.3	1552.56	262.475	175.725	724.398	1154.76	408.145	716.285	3046.95	3912.58	1.2	1.7	2	8	15.8	2.4	1.6	5.8	11	3.4	6.2	28.5	37.4
3441	1	B5XKM7	Enolase OS=Streptococcus pyogenes serotype M49 (strain NZ131) OX=471876 GN=eno PE=3	LKERGLVTAVGDEGG	T	200	M P	yes	1713.82	880.057	653.475	3494.28	2425.25	2080.04	1812.57	7176.27	7318.19	1987.13	2344.9	939.414	864.517	5.8	3.3	2.4	13.5	9.2	7.8	6.1	19.8	20.4	7.1	8.4	3.5	3.4
1627	2	A0A0H3BVE1	30S ribosomal protein S5 OS=Streptococcus pyogenes serotype M49 (strain NZ131) OX=471876 GN=rpsE PE=3	LKPAVEGSGVAAGGA	S	102	P L	yes	271.663	218.736	155.278	1634.11	3614.7	204.838	394.161	3784.25	7168.95	328.572	453.589	7849.74	13441.8	2.8	1.9	1.4	15.5	39.8	2.2	4.4	37.2	94.4	3.6	5.3	96.8	161.9
799	1	A0A0H3C2S7	Uncharacterized protein OS=Streptococcus pyogenes serotype M49 (strain NZ131) OX=471876 GN=Spy49_1801c PE=4	LKTISPVSQFKSNNR	S	148	M	yes	5959.85	4157.05	4387.61	4019.48	3387.53	7387.98	8063.31	9271.41	7887.92	4573.49	3160.79	3067.04	4040.56	1283.1	816.2	872	822.9	739.8	1502.1	1245.1	1316.2	1509.3	1147.4	820.4	817.6	1156.9
1021	2	A0A0H3BZC7	EIIAB-Man OS=Streptococcus pyogenes serotype M49 (strain NZ131) OX=471876 GN=manL PE=4	LLHGQVATAWTPASK	T	186	M P L	yes	7191.52	3167.84	3186.01	14023.1	8285.48	2403.22	5508.37	34915.1	34461.3	8246.27	5992.76	13267.2	24382.4	186.4	107.1	77.9	388.5	278.2	74.2	118.6	677.5	703	224.1	166.9	413	836.3
6043	1	A0A0H3C0F2	Tagatose 1,6-diphosphate aldolase OS=Streptococcus pyogenes serotype M49 (strain NZ131) OX=471876 GN=lacD2 PE=3	LLLAYEKTGYDATTT	T	95	M	yes	281.462	268.721	234.596	3488.37	1266.6	496.187	296.453	386.167	697.8	386.578	479.402	1569.74	1753.76	15	22.3	6.8	69.4	26.6	40.5	48.3	78.3	139.1	25.8	37	127	141.7
2811	1	A0A0H3BZ23	Cell division protein FtsZ OS=Streptococcus pyogenes serotype M49 (strain NZ131) OX=471876 GN=ftsZ PE=3	LMGIGIGSGEERIVE	S	233	M P L	yes	188.833	126.18	28.414	4067.55	8819.62	196.229	199.713	3402.19	5594.2	246.95	327.585	3158.4	5710.19	3	2.3	0.5	70.7	148.7	3.6	3.2	46.7	86.5	4.4	5.7	54.5	100.4
965	1	B5XJ35	30S ribosomal protein S10 OS=Streptococcus pyogenes serotype M49 (strain NZ131) OX=471876 GN=rpsJ PE=3	LMKLDLPSGVNVEIK	S	94	M P L	yes	152.322	123.835	76.1064	7357.95	18865.2	317.242	488.23	11393.7	20632.3	116.042	327.825	6161.02	6972.52	1.7	1.3	0.8	89.1	247.6	3.9	5.5	132.9	292.6	1.4	4.2	84.2	100.5
459	4	A0A0H3C049	Spi SpeB protease inhibitor OS=Streptococcus pyogenes serotype M49 (strain NZ131) OX=471876 GN=Spy49_1689c PE=4	LNHDNVRSMIEAYQK	S	88	M L	yes	7433.17	6390.61	3238.12	54997.3	186951	9271.56	4672.56	8555.45	12326.9	7608.07	8619.35	15054.5	22633.7	3834	5389.5	4935	4205.8	10570.3	6323.1	7277.8	5988.7	7191	4288.9	5222.2	10595.3	14989.2
1655	2	A0A0H3BYW2	EIICB-Lac OS=Streptococcus pyogenes serotype M49 (strain NZ131) OX=471876 GN=lacE PE=4	LNKAAKEYGAPVTAA	Y	489	M P L	yes	2098.15	879.436	670.347	18555.7	15031.7	1981.99	1392.14	1071.26	1205.47	2712.62	2891.83	8131.97	15228.6	296.6	150.3	54.8	1068.4	991.7	318.7	420.7	470.1	519	375.8	463.4	1198.3	2326
2252	2	A0A0H3BZL9	PTS system, fructose-specific IIABC component OS=Streptococcus pyogenes serotype M49 (strain NZ131) OX=471876 GN=fruA PE=4	LNNEGNTYHAKNGKS	Y	267	M P L	yes	809.452	730.737	240.404	12976.4	16856.3	824.734	2479.25	2006.16	1791.25	2644.32	3004.37	14878.6	17542.5	13.5	16.5	5	298.1	401.3	12.4	34.9	32	28.5	48.9	56.3	294.5	354.8
4865	1	B5XKI1	Elongation factor Tu OS=Streptococcus pyogenes serotype M49 (strain NZ131) OX=471876 GN=tuf PE=3	LPVEDVFSITGRGTV	S	223	M P	yes	0	31.3046	33.6357	7094.92	11946.9	33.1683	450.315	3191.48	3890.66	36.5379	37.9081	1344.91	1710.16	0	0.1	0.1	19.6	33	0.1	1.2	7.6	9.6	0.1	0.1	3.5	4.5
461	1	A0A0H3C178	Putative putative C3-degrading proteinase OS=Streptococcus pyogenes serotype M49 (strain NZ131) OX=471876 GN=cppA PE=4	LQGTDLPSLEKDATF	S	136	M P	yes	9965.48	6414.27	3701.63	10891.5	10350.7	7622.83	12808.5	9804.16	9029.61	13805.6	15045.3	15122	13671.6	1068.5	713.3	430.6	1070.2	975.1	896.1	1724.5	1083.6	1001.6	1544.6	1617.2	1586	1367.2
1164	1	A0A0H3BZQ5	SSU ribosomal protein S1p OS=Streptococcus pyogenes serotype M49 (strain NZ131) OX=471876 GN=rpsA PE=4	LRGFIPASMIDTRFV	S	136	M P L	yes	868.854	674.134	244.749	7586.67	14220.7	870.012	918.667	2919.59	3334.18	1818.9	2540	13204	18160.1	12.4	9.1	3.4	109.6	206	13.3	12.2	40.6	50.3	26.8	38.6	204.7	283.5
2154	2	B5XHV3	Translation initiation factor IF-2 OS=Streptococcus pyogenes serotype M49 (strain NZ131) OX=471876 GN=infB PE=3	LRNSRVATGEAGGIT	T	483	M P	yes	1108.13	385.301	149.246	8872.68	8024.52	1070.66	1220.56	2073.9	2174.37	2775.12	3484.18	9104.16	9269.59	63.4	24.1	10.5	611.3	603.4	71.2	88.2	129.2	152.4	166.8	207.4	574.6	547.9
23741	1	A0A0H3BWD6	Phosphoribosylaminoimidazole-succinocarboxamide synthase OS=Streptococcus pyogenes serotype M49 (strain NZ131) OX=471876 GN=purC PE=3	LRNVTAGSFSKRFGV	S	109	M	yes	0	0	0	0	0	0	0	266.971	290.018	0	0	0	0	0	0	0	0	0	0	0	26.3	37.2	0	0	0	0
1041	3	B5XLE2	50S ribosomal protein L10 OS=Streptococcus pyogenes serotype M49 (strain NZ131) OX=471876 GN=rplJ PE=3	LRRSLRESGVEFKVI	S	49	M L	yes	727.44	627.968	230.151	2720.56	2971.86	922.743	1157.57	2489.14	2895.44	703.531	1086.15	30453.3	46222.7	10.9	8.5	3	41	52.1	14.6	17.9	41.6	51	10.7	16.7	500.9	795.3
12647	1	B5XJR1	Elongation factor G OS=Streptococcus pyogenes serotype M49 (strain NZ131) OX=471876 GN=fusA PE=3	LTFFRVYSGVLNSGS	S	331	P	yes	0	0	0	452.986	2974.84	42.0001	197.67	606.341	2232.79	10.784	10.5906	42.4329	1575.82	0	0	0	3.9	29.1	0.4	1.7	3.6	18.2	0.1	0.1	0.4	15.2
6844	2	A0A0H3C1C5	Putative peroxide resistance protein OS=Streptococcus pyogenes serotype M49 (strain NZ131) OX=471876 GN=Spy49_1183c PE=3	LVENIYASVTHNISK	S	12	P	yes	0	25.642	0	3108.8	6086.06	37.4091	357.091	1062.35	1298.87	159.764	336.39	3243.26	3072.48	0	0.3	0	30.9	56.8	0.4	6.9	13.9	17.8	1.4	3	29.8	29.4
1927	1	B5XJ39	50S ribosomal protein L2 OS=Streptococcus pyogenes serotype M49 (strain NZ131) OX=471876 GN=rplB PE=3	LVRAAGASAQVLGQE	S	161	M P L	yes	221.926	191.928	114.811	736.983	1215.86	223.806	338.09	553.105	1033.61	201.06	314.88	5972.81	20258.9	1.6	1.5	0.9	6.2	11.5	2	3	4.2	9.6	1.5	2.5	51.8	178
1589	2	A0A0H3BZ23	Cell division protein FtsZ OS=Streptococcus pyogenes serotype M49 (strain NZ131) OX=471876 GN=ftsZ PE=3	----MAFSFDTASIQ	S	4	M P L	yes	623.148	658.333	488.721	10827.6	13078.2	964.793	1647.63	8516.4	11350.1	825.036	1264.36	2538.31	2064.54	9.9	12	8.6	188.2	220.5	17.7	26.4	116.9	175.5	14.7	22	43.8	36.3
291	2	A0A0H3BZ23	Cell division protein FtsZ OS=Streptococcus pyogenes serotype M49 (strain NZ131) OX=471876 GN=ftsZ PE=3	-MAFSFDTASIQGAI	T	7	M P L	yes	33964.7	9008.19	18821.5	12214.2	10776.9	21329	39599.3	53080	49785.2	7167.15	5522.97	4410.17	3952.77	539.6	164.2	331.2	212.3	181.7	391.3	634.5	728.6	769.8	127.7	96.1	76.1	69.5
536	3	B5XIW7	Chaperonin GroEL OS=Streptococcus pyogenes serotype M49 (strain NZ131) OX=471876 GN=groEL PE=3	MAKDIKFSADARAAM	S	8	M L	yes	4598.75	4173.49	2038.47	9219.91	15294.6	5244.06	11396.5	39816.6	38547.4	5530.1	6180.85	10643.2	12364.1	18.6	20.4	11	50.3	83.1	24	69.9	190	221.7	24.9	26.3	47.9	56
4431	1	A0A0H3BZJ0	Formate acetyltransferase OS=Streptococcus pyogenes serotype M49 (strain NZ131) OX=471876 GN=pfl PE=3	MATVKTNTDVFEKAW	T	8	M L	yes	624.741	434.419	404.759	4698.84	8897.21	756.2	817.097	1166.21	1484.3	613.532	714.095	1797.25	2878.26	16.9	16.5	7.5	51	103.8	21.4	21.2	36.6	50.6	23.3	30.6	82.9	137.7
906	2	A0A0H3BXY9	Isoleucine--tRNA ligase OS=Streptococcus pyogenes serotype M49 (strain NZ131) OX=471876 GN=ileS PE=3	MCRQYALSQVDKQRN	S	115	M L	yes	2853.26	2500.16	1592.27	11884.3	21077.8	2616.11	4170.77	6405.15	7115.33	2568.38	3024.2	10740.6	17246.6	180.3	195.1	114	879.8	1465.6	199.7	257.7	307.4	344.6	170.2	206.3	713.4	1188.9
173	2	B5XJ02	UPF0297 protein Spy49_1751c OS=Streptococcus pyogenes serotype M49 (strain NZ131) OX=471876 GN=Spy49_1751c PE=3 M	----MGFTDETVRFK	T	4	M	yes	23885.7	24950.3	20129.3	13022.4	15032.1	29476.6	27705.5	21872.4	14575.1	17417	19331.5	32182.9	31241.5	1338.9	1306.6	1258.9	790.7	884.2	1689.1	1969.5	931	874.2	1079.2	1237.9	2011.9	2094.4
181	2	B5XJ02	UPF0297 protein Spy49_1751c OS=Streptococcus pyogenes serotype M49 (strain NZ131) OX=471876 GN=Spy49_1751c PE=3 M	-MGFTDETVRFKLDD	T	7	M L	yes	15347.6	14573.8	12403.1	1954.92	1540.27	30284.6	12518.5	28549.2	54255.8	3079.29	3288.81	4666.12	3459.18	860.3	763.2	775.7	118.7	90.6	1735.4	889.9	1215.2	3254.2	190.8	210.6	291.7	231.9
2715	2	B5XL08	Phosphopentomutase OS=Streptococcus pyogenes serotype M49 (strain NZ131) OX=471876 GN=deoB PE=3	MGHNKSNSHGIDTLI	S	270	P	yes	1006.57	602.991	314.338	5512.03	9219.31	730.212	2041.53	6306.15	7891.79	1519.3	1797.04	3401.16	4894.95	61.4	36.9	17.6	168.6	263.5	36.3	99.6	270.6	393.6	97.4	118	222.2	337.9
5640	1	A0A0H3BVU9	Response regulator CsrR OS=Streptococcus pyogenes serotype M49 (strain NZ131) OX=471876 GN=csrR PE=4	MMMTARDSIMDVVAG	S	84	M P	yes	572.845	484.653	311.698	1445.68	3094.28	562.9	1220.7	1513.07	2573.71	668.361	862.466	838.049	914.032	30.3	26.8	17.9	89.5	176.4	30.6	61.7	69	128.5	37	46.7	48	52.4
6460	1	B5XKM2	50S ribosomal protein L19 OS=Streptococcus pyogenes serotype M49 (strain NZ131) OX=471876 GN=rplS PE=3	-MNPLIQSLTEGQLR	S	7	M	yes	21.9347	5.67072	5.70369	15.8695	134.756	9.45256	33.439	97.976	98.6779	15.5569	61.1053	2307.25	4696.35	0.4	0.1	0.1	0.3	2.7	0.2	0.7	1.9	2.3	0.3	1.2	47.3	91.7
970	2	B5XIG1	Trigger factor OS=Streptococcus pyogenes serotype M49 (strain NZ131) OX=471876 GN=tig PE=3	MPADQVRSLLSADML	S	400	M P L	yes	1401.91	1009.71	481.958	10669.5	18078.3	1242.58	1563.89	5511.73	6538.57	1645.61	1975.46	7907.61	15862.8	25.1	21.5	9.7	215.3	429.5	28.4	31.8	98.5	140.9	36.2	45.8	182.2	404.4
2979	1	A0A0H3C0Z3	Uncharacterized protein OS=Streptococcus pyogenes serotype M49 (strain NZ131) OX=471876 GN=Spy49_1787c PE=4	------MSDAFTDVA	S	2	M	yes	2467.69	2845.93	2262.02	1926.94	2404.4	2212.2	1398.85	1761.8	1686.5	1797.64	2026.09	2274.64	2213.63	4150.1	3337	2914.1	2831	3709.5	3056.1	2279.1	3342.1	3048	3122.2	3148	4683.2	4631.5
1184	2	B5XLE2	50S ribosomal protein L10 OS=Streptococcus pyogenes serotype M49 (strain NZ131) OX=471876 GN=rplJ PE=3	------MSEAIIAKK	S	2	M L	yes	6580.33	10077	9482.24	9336.17	7609.34	5985.19	2948.89	1783.09	1510.17	3576.83	3739.75	6815.36	6840.7	98.6	136.4	123.6	140.7	133.4	94.7	45.6	29.8	26.6	54.4	57.5	112.1	117.7
2941	3	A0A0H3C1S0	CsbD domain-containing protein OS=Streptococcus pyogenes serotype M49 (strain NZ131) OX=471876 GN=Spy49_1665c PE=3	MSEEKLKSKIEQASG	S	8	M P L	yes	2913.15	1375.6	659.434	8964.94	5075.62	3187.32	2707.16	19117.8	10957.1	8243.29	11659.5	14432.6	9152.22	2123.9	1252.9	953.5	14165.6	7366.8	2896.4	3648.7	10194.5	11439.1	8552.1	11130	20887.5	27593.8
369	1	A0A0H3BZR7	Mid-cell-anchored protein Z OS=Streptococcus pyogenes serotype M49 (strain NZ131) OX=471876 GN=mapZ PE=3	------MSEESKEVE	S	2	M	yes	10812.7	8924.51	9477.78	15301.5	6611.72	10580.9	8693.22	9354.6	4037	11685.2	13696.6	14505.5	7714.39	802.2	802.6	884.5	1363.7	676	822.2	665.6	895.4	508.8	865.5	1039	1273.7	824.1
530	1	A0A0H3BZR7	Mid-cell-anchored protein Z OS=Streptococcus pyogenes serotype M49 (strain NZ131) OX=471876 GN=mapZ PE=3	---MSEESKEVEVTK	S	5	M L	yes	5104.42	4184.27	2870.66	13732.9	10808.6	6745.91	6014.46	8976.41	8248.55	6452.16	7151.5	8832.9	7329.66	378.7	376.3	267.9	1223.9	1105.1	524.2	460.5	859.2	1039.6	477.9	542.5	775.6	783
18287	1	A0A0H3C2S7	Uncharacterized protein OS=Streptococcus pyogenes serotype M49 (strain NZ131) OX=471876 GN=Spy49_1801c PE=4	---MSEKSLGEVLRE	S	5	M	yes	25.0824	0.509317	0	281.349	657.999	34.429	63.4651	171.171	217.41	27.9017	29.2808	201.443	339.828	5.4	0.1	0	57.6	143.7	7	9.8	24.3	41.6	7	7.6	53.7	97.3
2479	1	A0A0H3BZW4	Streptolysin S export ATP-binding protein (SagG) OS=Streptococcus pyogenes serotype M49 (strain NZ131) OX=471876 GN=sagG PE=4	------MSFVQLTNV	S	2	M L	yes	1139.49	793.672	407.344	5567.91	10059.7	835.793	497.338	351.517	222.872	869.001	1073.88	1911.83	2374.99	459.3	384.2	174.3	856.4	1377.2	389	249.7	204.5	122.6	366.1	441.2	744.7	884.3
75	2	B5XKM7	Enolase OS=Streptococcus pyogenes serotype M49 (strain NZ131) OX=471876 GN=eno PE=3	------MSIITDVYA	S	2	M P L	yes	65391.2	70031.2	58622.1	96985.7	142852	46934.3	24365.7	13772.6	5668.01	42597.3	41175.4	22975.4	4322.58	221.3	262.6	215.3	374.7	541.9	176	82	38	15.8	152.2	147.5	85.6	17
1775	2	A0A0H3BY96	Phosphate acetyltransferase OS=Streptococcus pyogenes serotype M49 (strain NZ131) OX=471876 GN=pta PE=3	---MSIRSLFGGLRE	S	5	M L	yes	1250.92	741.384	244.793	7178.52	24171.7	743.982	1413.88	7676.4	7927.42	1069.07	1752.25	3982.05	5708.43	23.5	17.8	4.8	103.5	384.9	14.6	29.2	150.4	175.9	28.2	46.8	98.2	147.5
336	2	B5XKG9	Lysine--tRNA ligase OS=Streptococcus pyogenes serotype M49 (strain NZ131) OX=471876 GN=lysS PE=3	------MSNQHIEEL	S	2	M P L	yes	34149.2	20647.3	15586.9	52323.4	23509.9	21072.2	21446.2	13189	7098.99	29515.6	30614.2	21340	12879.6	1131.3	625.1	482.2	1672.4	765.7	724.5	775	406.1	301.1	1018.4	1146.5	841.3	579.7
3643	2	A0A0H3BVR1	Amino acid ABC transporter, ATP-binding protein OS=Streptococcus pyogenes serotype M49 (strain NZ131) OX=471876 GN=Spy49_0236c PE=4	------MSNSIIEIK	S	2	M	yes	775.348	902.462	552.807	2499.19	3607.58	969.72	637.745	1737.28	1288.94	831.053	973.162	2799.91	3346.8	306	288.5	186.4	910.2	1363	323.9	271	441.4	474.9	387	439.2	1266.4	1639
757	2	B5XKU5	UPF0342 protein Spy49_0636 OS=Streptococcus pyogenes serotype M49 (strain NZ131) OX=471876 GN=Spy49_0636 PE=3	------MSQEIYDYA	S	2	M P L	yes	8327.16	7991.7	7841.25	16661.9	31010.4	5920.74	5279.63	4120.71	2099.3	3132.25	3556.13	9456.87	9965.93	4064.3	2162.6	2053.5	4409.1	5854.2	2253.5	2799.5	1375	1170.5	2555.3	3502.5	9478.4	4551.1
1740	2	B5XJ99	30S ribosomal protein S4 OS=Streptococcus pyogenes serotype M49 (strain NZ131) OX=471876 GN=rpsD PE=3	MSRYTGPSWKQSRRL	S	8	M L	yes	286.316	223.267	132.651	1989.37	6053.77	318.738	319.917	3124.44	5840.47	275.978	729.155	16635.5	22792.2	3.5	2.8	1.7	27.4	88.4	4.6	4.5	43.1	87.8	3.7	10	245.7	343.5
3213	2	B5XKV2	50S ribosomal protein L21 OS=Streptococcus pyogenes serotype M49 (strain NZ131) OX=471876 GN=rplU PE=3	-----MSTYAIIKTG	T	3	M L	yes	280.865	272.799	171.423	2563.83	5319.56	398.833	341.844	1541.58	3009.37	407.919	566.881	1463.12	1752.05	7.5	7.3	4.7	67.4	170.4	12.3	8.5	48.2	99	10.2	14.9	41.1	44.1
1196	2	B5XMC3	Arginine deiminase OS=Streptococcus pyogenes serotype M49 (strain NZ131) OX=471876 GN=arcA PE=3	------MTAQTPIHV	T	2	M P L	yes	4780.47	3301.58	2016.8	35597.2	57959.9	4976.49	4308.18	11245.9	14290.8	5509.39	6065.79	14312.2	19704	53.5	44.1	21.5	142.5	237.4	59.1	99.2	314.6	378	61.4	74	179.4	244.8
2256	2	A0A0H3BXH0	Endolytic murein transglycosylase OS=Streptococcus pyogenes serotype M49 (strain NZ131) OX=471876 GN=mltG PE=3	------MTDFKDKDQ	T	2	M	yes	3006.56	1991.86	755.844	4728.89	666.9	2523.92	3095.35	2423.55	1503.87	3396.24	3103.78	4412.27	4920.5	741.7	402.2	168.8	1084	207.1	597.2	742.1	532	1639.5	834.8	799.8	1418.2	1632.4
8128	2	A0A0H3BZS4	dTDP-4-dehydrorhamnose 3,5-epimerase OS=Streptococcus pyogenes serotype M49 (strain NZ131) OX=471876 GN=rmlC PE=4	------MTETFFDKP	T	2	P	yes	580.58	166.22	125.391	605.802	704.111	297.721	1107.32	1498.42	1966.65	660.364	516.997	609.401	916.085	28.1	8.7	6.7	33.8	42.1	14.1	56	72.3	99.2	35.2	26.8	32.1	51.9
5495	1	B5XK49	Bifunctional protein GlmU OS=Streptococcus pyogenes serotype M49 (strain NZ131) OX=471876 GN=glmU PE=3	------MTNYAIILA	T	2	M P L	yes	62.2449	60.6371	20.9697	2165.85	4384.38	110.949	176.776	564.334	610.569	78.4712	95.0906	703.805	977.593	12.1	8.5	2.8	303.6	649.4	18.7	21.5	82.5	101.4	15.7	20.6	164.6	226.3
3080	2	B5XMC1	Ornithine carbamoyltransferase OS=Streptococcus pyogenes serotype M49 (strain NZ131) OX=471876 GN=arcB PE=3	------MTQVFQGRS	T	2	M	yes	1112.6	848.321	634.334	8928.3	20582	1332.12	968.62	1220.49	1484.65	1034.29	1305.16	2708.27	3550.12	13.1	14.2	8.1	40.3	88.1	19.9	26.5	46.1	43.1	11.7	14.5	28.7	36.4
1699	2	A0A0H3C281	50S ribosomal protein L13 OS=Streptococcus pyogenes serotype M49 (strain NZ131) OX=471876 GN=rplM PE=3	MYPGGLKSITAGELR	S	88	M L	yes	1068.72	854.249	801.074	1418.04	1578.66	1287.71	1423.89	3079.69	6042.2	1363.27	2247.68	11894.7	16532.3	9.9	8.6	8.3	16.1	19.9	14.9	15.9	33	69	13.9	24.3	133.6	180.7
15012	1	A0A0H3BVD7	Aldehyde-alcohol dehydrogenase OS=Streptococcus pyogenes serotype M49 (strain NZ131) OX=471876 GN=adhE PE=3	NAVGDNVSAINLLNI	S	447	P	yes	18.424	0	0	925.634	1319.49	5.72183	0	835.673	1224.58	5.30844	5.27174	148.601	598.792	0.3	0	0	9.2	15	0.1	0	21	39.9	0.1	0.1	3	11.9
3377	3	B5XKG9	Lysine--tRNA ligase OS=Streptococcus pyogenes serotype M49 (strain NZ131) OX=471876 GN=lysS PE=3	NDPIDQLSRFEAQAQ	S	432	M P L	yes	546.362	591.245	213.342	19009.6	28784.8	855.102	1032.18	3030.13	3706.28	466.615	750.335	1090.72	246.616	18.1	17.9	6.6	607.6	937.5	29.4	37.3	93.3	157.2	16.1	28.1	43	11.1
4903	1	B5XI03	GTP-sensing transcriptional pleiotropic repressor CodY OS=Streptococcus pyogenes serotype M49 (strain NZ131) OX=471876 GN=codY PE=3	NEGRLTASVIADRIG	S	208	M P	yes	195.861	161.777	16.3255	305.938	947.644	179.575	1061.5	3358.05	4126.35	47.9788	125.719	773.878	1109.81	37.8	33.2	2.7	50.2	158.6	24.3	99.4	262.9	427.8	9.3	25.4	158.1	226.2
1746	8	A0A0H3BZX9	PTS system, mannose-specific IIC component OS=Streptococcus pyogenes serotype M49 (strain NZ131) OX=471876 GN=manM PE=4	NGGNAAGSADPIGDI	S	258	M P L	yes	8416.46	7822.16	5102.7	138220	224054	10931.8	13436.9	85220.4	55109.6	11565.3	14979.6	78832.1	106986	974.9	1072.5	441.3	12791	20253.3	1143.8	751.3	7357.9	3697.3	1093.8	1463.4	7776.1	10009.5
6545	1	B5XJU2	Probable transcriptional regulatory protein Spy49_0265 OS=Streptococcus pyogenes serotype M49 (strain NZ131) OX=471876 GN=Spy49_0265 PE=3	NGGNMGASGSVSYLF	S	124	P	yes	611.799	586.665	440.259	4669.94	7142.2	313.512	561.568	1966.02	1881.94	645.346	798.379	3487.54	4968.97	34.3	31	24.8	264.7	424.2	16.9	34.1	92.4	109.1	34.5	41.8	204.3	271
2836	2	A0A0H3BZ40	Oligopeptide transport ATP-binding protein oppD OS=Streptococcus pyogenes serotype M49 (strain NZ131) OX=471876 GN=oppD PE=3	NGRIANGSIVYRGQE	S	72	M	yes	569.675	447.203	177.353	4838.06	11957.2	798.274	850.032	2968.45	4173.66	675.078	869.152	3055.53	6610.49	129.9	119.4	42.7	982.2	2122	145.3	96.2	439.3	602.1	150.2	193.6	681.4	1382.2
1785	2	A0A0H3BZ23	Cell division protein FtsZ OS=Streptococcus pyogenes serotype M49 (strain NZ131) OX=471876 GN=ftsZ PE=3	NHNQNQGSAFGNWDL	S	391	M P	yes	5243.25	1772.01	2079.91	9797.8	7514.77	1171.92	4718.21	16522.8	16996	7874.32	7229.87	13369.6	16834.8	83.3	32.3	36.6	170.3	126.7	21.5	75.6	226.8	262.8	140.3	125.8	230.7	296
577	1	A0A0H3BZT5	Peptide chain release factor 2 OS=Streptococcus pyogenes serotype M49 (strain NZ131) OX=471876 GN=prfB PE=3	NIAAQKTSQELNELK	S	17	M	yes	8170.9	7981.42	3263.9	20463.8	23707.8	13351.1	12882.9	16483.8	12068.4	9096.23	12574.2	18677.4	23886.8	2142.8	1579	753.3	4480.2	5477.1	3040.7	3473.4	3971.2	3421.7	2405.3	3354.2	5218.8	6934.3
2966	1	A0A0H3BWD2	ATP-dependent zinc metalloprotease FtsH OS=Streptococcus pyogenes serotype M49 (strain NZ131) OX=471876 GN=ftsH PE=3	NKIKIDASDIDEAED	S	418	M P L	yes	424.774	392.09	252.669	3697.8	7667.34	477.946	593.426	2013.02	2450.6	373.746	544.575	2251.08	4125.71	30.3	24	18.1	254.7	603.4	32.6	32.9	102.3	150.2	28.4	40.7	181.5	306.8
5478	1	B5XIW7	Chaperonin GroEL OS=Streptococcus pyogenes serotype M49 (strain NZ131) OX=471876 GN=groEL PE=3	NKIRGTFSVVAVKAP	S	270	M	yes	271.969	184.125	92.6578	1118.12	2190.21	305.903	163.04	838.243	1199.72	266.511	329.018	1577.59	2759.83	1.1	0.9	0.5	6.1	11.9	1.4	1	4	6.9	1.2	1.4	7.1	12.5
3975	2	B5XIJ1	30S ribosomal protein S9 OS=Streptococcus pyogenes serotype M49 (strain NZ131) OX=471876 GN=rpsI PE=3	NKKDVEEYIPHADLR	Y	38	P	yes	111.695	49.8886	44.0969	887.312	1859.3	82.7437	192.03	186.304	584.63	99.1538	131.8	9705.58	12242.5	5.7	2	1.8	36.3	98.4	4.2	9.5	7.6	33.4	5.5	7.8	665.7	1072.7
1908	1	B5XJA2	50S ribosomal protein L9 OS=Streptococcus pyogenes serotype M49 (strain NZ131) OX=471876 GN=rplI PE=3	NLAKEATSQSIGELK	S	41	M L	yes	563.693	631.593	302.145	3701.44	6007.72	771.7	948.296	2527.26	3119.67	812.02	1635.47	9730.39	10363.6	49.7	54.2	28.3	419.7	801	69.1	108.6	278.8	420.6	79.6	160.7	994.8	1501.1
957	1	A0A0H3BWF1	Protein translocase subunit SecY OS=Streptococcus pyogenes serotype M49 (strain NZ131) OX=471876 GN=secY PE=3	NLQKNSSYIPSVRPG	Y	347	M L	yes	904.374	639.211	280.711	3881.13	4719.95	1133.09	1573.81	850.42	528.612	1249.41	1579.85	21736.4	56213.1	92.8	62	25	318.3	396.4	119.3	145.8	65.4	44.4	140.8	180.8	2634.3	6600.4
1893	2	A0A0H3BZ18	Cell-division initiation protein OS=Streptococcus pyogenes serotype M49 (strain NZ131) OX=471876 GN=divIVA PE=4	NLVSKATYDAQHLLD	Y	98	M P L	yes	3019.46	939.475	648.316	18314.3	15343.5	2091.29	2846.43	8321.68	8861.21	3902.48	4711.04	9598.16	10027	83	24.1	16.7	465.4	381.7	58	64.8	210.8	250.5	120.4	144.3	316.8	340.4
10630	2	B5XK62	50S ribosomal protein L1 OS=Streptococcus pyogenes serotype M49 (strain NZ131) OX=471876 GN=rplA PE=3	NPKTGTVTMDVAKAV	T	146	M	yes	0	0	0	907.352	2507.6	37.4622	11.0994	465.926	739.436	38.782	116.323	122.639	99.0416	0	0	0	16.5	49.4	0.7	0.2	8.1	13.3	0.6	1.8	2	1.5
66	2	B5XKI1	Elongation factor Tu OS=Streptococcus pyogenes serotype M49 (strain NZ131) OX=471876 GN=tuf PE=3	NQPKDYASIDAAPEE	S	52	M P L	yes	26827.8	22007.1	16246	108632	141625	31211.3	36025.2	80542.8	85473	34236	45906.7	92645	127540	70.5	70.3	48.3	300.1	391.2	94.1	96	191.8	210.9	93.7	121.1	241.1	335.6
223	3	A0A0H3BXR4	Ribonucleoside-diphosphate reductase OS=Streptococcus pyogenes serotype M49 (strain NZ131) OX=471876 GN=nrdE1 PE=3	NQRYQPATPSFLNAG	T	155	M L	yes	4150.08	2826.53	1670.73	4230.49	9049.94	8586.72	44608.9	227414	209142	3125.91	3711.86	4652.81	4733.41	714	363.6	247	564.2	1312.6	1280.8	5190.1	18530.5	20725	609.1	699.2	876.2	943.7
1715	2	A0A0H3C0Z0	Putative ABC transporter OS=Streptococcus pyogenes serotype M49 (strain NZ131) OX=471876 GN=Spy49_1298c PE=4	NQTIDSFSHGMRQKV	S	134	M P	yes	1412.72	544.213	293.484	10240.9	14248.6	1291.43	1882.48	5157.27	7302.06	2207.59	3197.72	9623.04	12969.8	80.7	43.3	18.1	535.3	705.2	92.4	102.7	368.8	430.2	131.4	193.3	576.3	775.7
5888	2	B5XL08	Phosphopentomutase OS=Streptococcus pyogenes serotype M49 (strain NZ131) OX=471876 GN=deoB PE=3	NRHDYAVSPFQDTVL	S	227	P L	yes	281.971	53.926	5.35803	2903.13	7249.49	140.812	346.404	2670.67	3107.79	510.072	711.201	2738.38	3530.33	17.2	3.3	0.3	88.8	207.2	7	16.9	114.6	155	32.7	46.7	178.9	243.7
1776	6	B5XIW7	Chaperonin GroEL OS=Streptococcus pyogenes serotype M49 (strain NZ131) OX=471876 GN=groEL PE=3	NRIALIKSQLETTTS	S	349	M P L	yes	11917.2	11047.5	6448.98	69140.2	111443	14333.8	10320.4	26865.7	38860.4	17945.1	23125.3	79724.1	126224	48.2	54	34.8	377.2	605.5	65.6	63.3	128.2	223.5	80.8	98.4	358.8	571.7
715	1	B5XIY2	Histidine ammonia-lyase OS=Streptococcus pyogenes serotype M49 (strain NZ131) OX=471876 GN=hutH PE=3	NTTVATQSRVQDPYT	S	274	M P L	yes	2405.72	1449.16	499.526	24804.1	69180.5	2957.51	1564.08	2191.54	2619.94	3147.63	3056.96	4923.45	6439.7	879.5	788.1	212.8	2666.1	6378.9	1247.7	1284.3	2815.6	2932.6	959.8	854.7	1315.7	1592
1307	3	A0A0H3BYL1	Pyruvate kinase OS=Streptococcus pyogenes serotype M49 (strain NZ131) OX=471876 GN=pyk PE=3	NVFRFNFSHGDHKEQ	S	58	M L	yes	1392.85	427.667	269.24	12612.5	7294.22	540.037	2143.48	19932.1	21659.1	2508.05	2995.23	6298.1	10775.9	14.4	4.6	2.7	143.6	93.6	6.2	20.3	164.9	196.8	27.9	32.6	73.4	125.9
659	1	B5XJR1	Elongation factor G OS=Streptococcus pyogenes serotype M49 (strain NZ131) OX=471876 GN=fusA PE=3	NVGAPQVSYRETFRA	S	480	M P L	yes	2292	1740.44	793.909	7851.76	14189.3	4116.01	5441.74	31176	41932.3	2997.95	3696.1	7584.88	13373.7	20.9	14.3	6.8	67.6	138.8	39.2	46.8	185.1	341.8	27.8	34.9	71.5	129
975	1	A0A0H3BYQ9	PTS system, IIB component OS=Streptococcus pyogenes serotype M49 (strain NZ131) OX=471876 GN=Spy49_0834 PE=4	NVGRFDKSDPASKVK	S	112	M P L	yes	2718.93	2174.47	1687.23	24675.8	14100	2106.53	1131.81	1749.22	1856.61	2419.3	2443.16	6896.02	6217.54	114.8	123.8	57.5	441.7	271.9	114.4	107.2	147	176.8	124.3	131.6	395.8	362.2
1644	2	A0A0H3BWJ5	Transcription termination/antitermination protein NusG OS=Streptococcus pyogenes serotype M49 (strain NZ131) OX=471876 GN=nusG PE=3	NVTGFVGSHGNRSKP	S	100	M P L	yes	1660.21	519.763	202.451	13161.3	10271.2	1399.2	1882.24	7494.58	8044.94	2899.33	3608.19	10366.1	11118.3	141.8	45.9	16.6	1126.3	862	145.2	149.4	661.5	652	271.4	335.7	1080.9	1269.7
1380	1	A0A0H3C124	Putative mannose-specific phosphotransferase system component IID OS=Streptococcus pyogenes serotype M49 (strain NZ131) OX=471876 GN=manN PE=4	PALKKLYTSPEDRAT	T	49	M P L	yes	2247.74	1413.64	978.788	12290.8	17212.5	2005.54	2106.66	3988.44	4941.87	2483.93	2936.72	8084.66	13903.7	80.9	52.5	27	337.5	538.7	75.7	52.3	77.4	116.4	91.1	112.9	324.1	561.9
16	2	A0A0H3BZ18	Cell-division initiation protein OS=Streptococcus pyogenes serotype M49 (strain NZ131) OX=471876 GN=divIVA PE=4	PEVNLSETQTFKLNI	T	245	M P L	yes	398477	322961	443367	156183	49049.5	540111	997126	679251	823923	174127	193022	32554.4	24357.5	10953.5	8284.8	11420.7	3968.9	1220.2	14979.5	22699.9	17206.4	23291.7	5372.2	5912.3	1074.5	826.9
4099	2	A0A0H3C281	50S ribosomal protein L13 OS=Streptococcus pyogenes serotype M49 (strain NZ131) OX=471876 GN=rplM PE=3	PGGLKSITAGELRSK	T	90	M L	yes	86.3613	89.3982	48.2574	255.423	539.44	86.4238	134.329	326.634	761.842	58.8461	92.4972	3766.08	6962.42	0.8	0.9	0.5	2.9	6.8	1	1.5	3.5	8.7	0.6	1	42.3	76.1
2206	2	A0A0H3C1H6	Cysteine synthase OS=Streptococcus pyogenes serotype M49 (strain NZ131) OX=471876 GN=cysM PE=3	PHKIQGISAGFIPNT	S	225	M P L	yes	761.962	434.107	309.048	7502.83	17469.4	596.196	239.887	1789.4	3056.66	721.398	990.117	2203.77	5166.96	12.4	6.9	4.1	90.8	221.7	11.2	8.4	59.9	122.1	11.8	17.3	38.6	87.9
5343	2	A0A0H3BZD6	Putative PTS system enzyme II OS=Streptococcus pyogenes serotype M49 (strain NZ131) OX=471876 GN=Spy49_1737c PE=4	PHKTMQGTVITLTSP	T	522	P L	yes	666.918	507.946	221.297	4664.29	12316	739.55	322.078	496.437	436.012	454.757	574.797	2517.24	5122.6	58.7	71.5	17.6	276.9	761.4	95.4	90.2	189.4	185	42.6	58.6	270.6	577.5
3933	2	B5XKI2	Triosephosphate isomerase OS=Streptococcus pyogenes serotype M49 (strain NZ131) OX=471876 GN=tpiA PE=3	PIVCCGESLETYEAG	S	131	M P	yes	78.2169	23.3014	72.4303	7614.66	12930.3	47.4371	433.977	10499.8	11977.6	32.9055	91.5069	1020.18	1058.69	0.7	0.2	0.7	90.5	163.2	0.4	3.5	65.8	88.9	0.3	0.8	8.9	10.3
45	3	A0A0H3C1H3	Fructose-bisphosphate aldolase class II OS=Streptococcus pyogenes serotype M49 (strain NZ131) OX=471876 GN=fba PE=4	PIVLHGGSGIPDDQI	S	211	M P L	yes	16227.1	15878.1	12051.5	228899	315599	21311.5	83819	325912	272891	11478.3	21728.1	185132	200870	114.4	113.7	81.4	1749.8	2790.8	164.8	605.8	1792.8	1660.4	82.8	163.4	1446.6	1696
1362	5	A0A0H3BZR7	Mid-cell-anchored protein Z OS=Streptococcus pyogenes serotype M49 (strain NZ131) OX=471876 GN=mapZ PE=3	PKRDQFLSEDSHHPA	S	164	M P L	yes	3224.13	1096.38	489.694	19555.2	13876.8	2250.78	4054.05	7203.48	5771.44	5550.29	6422.51	23636.8	47448.1	239.2	98.6	45.7	1742.8	1418.8	174.9	310.4	689.5	727.4	411.1	487.2	2075.5	5068.7
379	2	A0A0H3BY55	Non-specific serine/threonine protein kinase OS=Streptococcus pyogenes serotype M49 (strain NZ131) OX=471876 GN=Spy49_1257c PE=4	PKVASGPTASVKLSP	T	302	M P L	yes	13062.8	3753.43	8110.3	3751.63	1594.42	8716.16	14455.3	53333.2	52530.2	3801.76	4992.27	7861.25	10972.3	1194.6	306.7	768.9	326.3	133.8	790.2	1376.3	4335	6819.4	366.5	467.5	792.9	1135
1082	1	B5XJ99	30S ribosomal protein S4 OS=Streptococcus pyogenes serotype M49 (strain NZ131) OX=471876 GN=rpsD PE=3	PNNRSKLSEYGLQLA	S	45	M P L	yes	212.692	127.581	23.4089	1742.51	4054.11	124.723	376.791	3646.38	6439.15	290.896	926.027	23582.2	35054.2	2.6	1.6	0.3	24	59.2	1.8	5.3	50.3	96.8	3.9	12.7	348.3	528.3
20	2	A0A0H3BY55	Non-specific serine/threonine protein kinase OS=Streptococcus pyogenes serotype M49 (strain NZ131) OX=471876 GN=Spy49_1257c PE=4	PPTPTVLTQESRLDQ	T	316	M L	yes	345496	211229	245868	105742	94096.8	358355	381206	414773	360053	242697	147472	90561.5	87781.1	31595.8	17259.9	23309.6	9197	7896.4	32488.2	36294.9	33713.4	46741.6	23396.7	13810	9134.2	9080.3
1456	2	A0A0H3BYR4	Putative cytoplasmic membrane protein OS=Streptococcus pyogenes serotype M49 (strain NZ131) OX=471876 GN=lemA PE=3	PQETMAASNELSKQV	S	91	M P L	yes	1371.49	1237.23	555.538	7182.53	26072.5	2280.52	323.818	8240.02	8557.94	2338.77	3036.32	10737.1	27337.6	59.4	51.1	27.9	450	1091.7	93.1	33.4	329.1	389.4	103.3	130.5	523	1155.5
1404	2	A0A0H3BZ23	Cell division protein FtsZ OS=Streptococcus pyogenes serotype M49 (strain NZ131) OX=471876 GN=ftsZ PE=3	PSAQKVISNHNQNQG	S	383	M P L	yes	1932.39	1909.17	841.055	13767.5	13991.6	555.982	1891.03	11459.6	10166.6	3962.42	4626.43	22682.5	27140.5	30.7	34.8	14.8	239.3	235.9	10.2	30.3	157.3	157.2	70.6	80.5	391.4	477.2
4111	1	A0A0H3BXS5	Protein-export membrane protein SecG OS=Streptococcus pyogenes serotype M49 (strain NZ131) OX=471876 GN=Spy49_0421 PE=3	PSSNVFDSSGSEALF	S	35	P	yes	529.868	524.944	374.568	3907.67	9263.94	555.994	491.492	926.178	643.715	698.676	717.418	2062.82	5306.24	86.1	71.9	47.7	533.9	1154.3	84.7	125.6	117.2	90.4	106.5	111.1	419.9	1309.4
666	2	A0A0H3BYW2	EIICB-Lac OS=Streptococcus pyogenes serotype M49 (strain NZ131) OX=471876 GN=lacE PE=4	PVTAAAGSYGAHREI	S	499	M P L	yes	5434.25	2252.71	1559.66	52370.8	59728.1	5726.43	3553.32	3145.64	3117.5	7108.54	8004.65	21641.4	47753.9	768.2	385	127.5	3015.4	3940.5	920.8	1073.8	1380.4	1342.2	984.8	1282.7	3189	7293.9
1399	2	A0A0H3BZB4	Phosphoenolpyruvate-protein phosphotransferase OS=Streptococcus pyogenes serotype M49 (strain NZ131) OX=471876 GN=ptsI PE=3	QAAQDELSVIRENAV	S	56	M P L	yes	484.356	502.082	580.097	14786.8	25996.8	1432.9	3915.58	6715.53	9659.96	482.129	959.523	2756.54	3836.67	7.3	10.1	10.2	304.1	577.4	26.8	52.4	88.2	130.1	8.3	17.5	52.9	82.3
1092	2	B5XKP7	ATP synthase subunit b OS=Streptococcus pyogenes serotype M49 (strain NZ131) OX=471876 GN=atpF PE=3	QAEQSRLSAQQLEAK	S	58	M P L	yes	1743.13	1610.3	1038.71	9330.91	17188.2	2550.74	2588.83	3159.94	6192.78	2133.63	2579.45	8804.37	15751.6	119.4	157.8	95.6	905.8	1637.4	233.8	297.4	391.2	828.8	162.3	192.4	683.3	1316.5
1080	1	A0A0H3BXH0	Endolytic murein transglycosylase OS=Streptococcus pyogenes serotype M49 (strain NZ131) OX=471876 GN=mltG PE=3	QANELQETASKESQV	T	122	M P L	yes	5478.44	1565.46	3145.17	1538.2	638.24	4888.08	8370.92	23245.5	20310.1	1358.42	1665.21	2823.39	2333.05	1351.5	316.1	702.4	352.6	198.2	1156.6	2006.9	5102.7	22141.9	333.9	429.1	907.5	774
2490	1	A0A0H3BY05	Carbamate kinase OS=Streptococcus pyogenes serotype M49 (strain NZ131) OX=471876 GN=arcC PE=3	QDQFAPGSMLPKVEA	S	273	P L	yes	1666.37	164.174	49.5409	8056.74	32354.7	968.154	1408.78	887.834	1685.14	1398.32	2331.28	3591.29	6749.55	63.3	5.7	1.5	60.7	262.8	32.9	99.3	80.4	146.1	49.8	82.3	127.8	266.4
681	2	A0A0H3BZ23	Cell division protein FtsZ OS=Streptococcus pyogenes serotype M49 (strain NZ131) OX=471876 GN=ftsZ PE=3	QEKAEQVSGFRQPRT	S	325	M L	yes	2171.57	2331.6	1761.67	9861.08	17170.7	3406.75	2577.54	12312	19117.3	3075.64	5959.76	11665.8	14139	34.5	42.5	31	171.4	289.5	62.5	41.3	169	295.6	54.8	103.7	201.3	248.6
10495	1	B5XKM5	Septation ring formation regulator EzrA OS=Streptococcus pyogenes serotype M49 (strain NZ131) OX=471876 GN=ezrA PE=3	QERIDSLYEVFEREI	Y	298	P L	yes	8.31651	4.71409	0	663.617	2102.54	1.81356	2.90433	19.4642	69.8025	4.02824	16.2069	831.501	1509	0.8	0.5	0	65.7	194.7	0.2	0.3	1.9	6.6	0.4	1.6	80.2	148.3
3	4	A0A0H3BY55	Non-specific serine/threonine protein kinase OS=Streptococcus pyogenes serotype M49 (strain NZ131) OX=471876 GN=Spy49_1257c PE=4	QESRLDQTNQTDALQ	T	324	M P L	yes	2.14271e+06	1.05035e+06	1.55629e+06	609287	464136	2.05525e+06	2.28718e+06	2.87017e+06	2.42625e+06	1.17708e+06	822103	475602	449860	195952	85825.7	147545	52993	38949.3	186328	217764	233292	314972	113474	76985.7	47970.1	46534.7
2642	2	A0A0H3BZC7	EIIAB-Man OS=Streptococcus pyogenes serotype M49 (strain NZ131) OX=471876 GN=manL PE=4	QGAIPAGTVIGDGKL	T	161	M P L	yes	702.176	343.109	470.336	1021.5	1241.93	450.2	901.033	11847.9	17539.5	448.927	463.191	1352.42	3728.94	18.2	11.6	11.5	28.3	41.7	13.9	19.4	229.9	357.8	12.2	12.9	42.1	127.9
4530	2	B5XJ51	50S ribosomal protein L6 OS=Streptococcus pyogenes serotype M49 (strain NZ131) OX=471876 GN=rplF PE=3	QGTKLVLSVGKSHQD	S	106	M	yes	274.599	178.416	96.8473	928.43	1849.86	280.256	556.142	2956.55	3602.46	248.421	367.883	1845.8	2620.62	3.4	1.9	1	11.1	26.1	3.6	7.2	39.5	58.7	3.1	4.8	27.1	43.2
5071	1	B5XJ99	30S ribosomal protein S4 OS=Streptococcus pyogenes serotype M49 (strain NZ131) OX=471876 GN=rpsD PE=3	QHGPNNRSKLSEYGL	S	42	P	yes	40.9022	47.8429	70.2268	740.567	1260.06	41.5745	277.261	927.907	937.934	111.883	342.703	3507.2	5407.75	0.5	0.6	0.9	10.2	18.4	0.6	3.9	12.8	14.1	1.5	4.7	51.8	81.5
1946	1	A0A0H3BXI3	Putative peptidoglycan branched peptide synthesis protein, serine/alanine adding enzyme OS=Streptococcus pyogenes serotype M49 (strain NZ131) OX=471876 GN=murM.1 PE=3	QKDLTILSEQLAAGK	S	288	M L	yes	694.23	620.773	318.94	6609.75	13165	888.24	830.628	2641.5	2162.89	879.614	1363.05	4958.22	6270.85	165.8	139.1	66.6	1674	3791.1	238.4	177.5	823.9	657.3	211.7	325.8	1304.7	1531.8
1873	1	A0A0H3BZR7	Mid-cell-anchored protein Z OS=Streptococcus pyogenes serotype M49 (strain NZ131) OX=471876 GN=mapZ PE=3	QKFDAKYTELDTASL	T	69	M P L	yes	2449.1	1744.65	1161.55	6146.64	10952.4	2134.96	2403.17	2132.31	1294.89	2008.96	2301.66	4210.32	5693.35	181.7	156.9	108.4	547.8	1119.8	165.9	184	204.1	163.2	148.8	174.6	369.7	608.2
4525	1	A0A0H3BX71	Uncharacterized protein OS=Streptococcus pyogenes serotype M49 (strain NZ131) OX=471876 GN=Spy49_0427c PE=4	QLIQRVQSLTVGRLL	S	89	M	yes	163.352	114.825	67.992	1288.94	2560.21	151.09	223.867	509.801	936.61	256.226	303.512	2186.8	4728.04	24	15.7	10.7	206.7	421.7	24.8	43.7	82.1	176.6	41.2	50.9	395.2	870.6
406	2	A0A0H3BYM9	Glyceraldehyde-3-phosphate dehydrogenase OS=Streptococcus pyogenes serotype M49 (strain NZ131) OX=471876 GN=plr PE=3	QLVRTLEYFAKIAK-	Y	330	M L	yes	2407.9	1857.99	1329.65	19150.9	36583.4	3423.57	2218.09	15959.3	31931.3	3154.48	4309.33	20877.3	40621.6	5.4	4.7	3.2	46.8	93.4	8.8	5.4	27.6	55.6	7.3	9.8	44.9	86.2
3807	1	A0A0H3BY05	Carbamate kinase OS=Streptococcus pyogenes serotype M49 (strain NZ131) OX=471876 GN=arcC PE=3	QMAESGASFKEDAGR	S	150	M P L	yes	179.01	230.42	102.385	7101.08	12459.3	347.241	270.974	339.011	757.794	272.364	311.593	660.37	1279.48	6.8	8	3.1	53.5	101.2	11.8	19.1	30.7	65.7	9.7	11	23.5	50.5
6985	2	B5XKI2	Triosephosphate isomerase OS=Streptococcus pyogenes serotype M49 (strain NZ131) OX=471876 GN=tpiA PE=3	QNCYFENTGAFTGET	T	72	P	yes	737.473	302.918	103.472	1186.37	1814.36	806.43	942.35	4515.87	5955.11	932.323	960.823	2315.46	3556.38	6.6	2.6	1	14.1	22.9	6.8	7.6	28.3	44.2	8.5	8.4	20.2	34.6
1048	2	B5XI23	Protein translocase subunit SecA OS=Streptococcus pyogenes serotype M49 (strain NZ131) OX=471876 GN=secA PE=3	QNIQSQQSANTDDLP	S	806	M P L	yes	12696.9	4289.39	4387.29	30615	16383.7	13613.5	14955.7	20801.6	16222.8	16256.8	21766.4	31288.8	39793.2	495	198.9	203.4	1551.7	852	673	785.4	1071.3	905.7	749.3	1037.2	1568.7	2120.4
1400	2	B5XIG1	Trigger factor OS=Streptococcus pyogenes serotype M49 (strain NZ131) OX=471876 GN=tig PE=3	QPKIDVVSMEKGKEW	S	97	M L	yes	731.673	610.52	362.711	6144.99	13014.7	905.685	624.574	3066.42	3744.94	895.538	1147.32	6158.56	10583	13.1	13	7.3	124	309.2	20.7	12.7	54.8	80.7	19.7	26.6	141.9	269.8
471	1	B5XMJ7	Cell cycle protein GpsB OS=Streptococcus pyogenes serotype M49 (strain NZ131) OX=471876 GN=gpsB PE=3	QPTRVAQSATNFDIL	S	84	M P L	yes	6596.21	3825.93	4191.45	25518.5	28659.8	8066.6	8050.72	6593.5	6037.2	9744.42	9402.41	16655	29200.4	520.2	289.9	330.8	2579.9	3123.6	634.4	697.9	1311.3	1092.1	850.8	794.2	1598.5	3171.8
1098	2	A0A0H3BZC9	Uridylate kinase OS=Streptococcus pyogenes serotype M49 (strain NZ131) OX=471876 GN=pyrH PE=3	QRILIKLSGEALAGE	S	13	M	yes	660.453	725.33	535.359	5208.31	8362.02	1169.46	3237.99	14108.9	29313.2	934.573	1343.69	4732.43	5839.87	190.7	159.8	113	1068.5	1787	292.4	530.6	2613.8	6022.5	231.3	350.1	1278.9	1502.7
327	2	B5XI23	Protein translocase subunit SecA OS=Streptococcus pyogenes serotype M49 (strain NZ131) OX=471876 GN=secA PE=3	QSQQSANTDDLPKVE	T	809	M P L	yes	53573.1	21865.3	26791.8	13885.9	4265.15	46310.3	66653.3	43065.4	25925.7	28630	16652.2	9657.7	9749.37	2088.6	1013.9	1242.1	703.8	221.8	2289.4	3500.3	2217.9	1447.4	1319.6	793.5	484.2	519.5
1661	3	B5XJ99	30S ribosomal protein S4 OS=Streptococcus pyogenes serotype M49 (strain NZ131) OX=471876 GN=rpsD PE=3	QSRRLGLSLTGTGKE	S	18	M P L	yes	507.188	382.743	210.68	1931.28	3773.33	582.043	1173.03	8322.16	10882.7	529.58	1903.09	19702.6	22513.5	6.2	4.8	2.7	26.6	55.1	8.4	16.5	114.8	163.6	7.1	26.1	291	339.3
616	1	A0A0H3C0J7	Phosphocarrier protein HPr OS=Streptococcus pyogenes serotype M49 (strain NZ131) OX=471876 GN=ptsH PE=3	QTASKFASDITLDYK	S	31	M P L	yes	10290.9	9081	6799.4	6161.8	6027.8	6406.5	2951.6	10209.3	4078.9	8785.8	9389.7	6710.9	2083.6	10290.9	9081	6799.4	6161.8	6027.8	6406.5	2951.6	10209.3	4078.9	8785.8	9389.7	6710.9	2083.6
676	4	A0A0H3BZ03	R3H domain protein OS=Streptococcus pyogenes serotype M49 (strain NZ131) OX=471876 GN=Spy49_0209 PE=4	QVDIEGISDKTVYKA	S	55	M P	yes	4428.71	1933.66	932.014	18696.4	19102.8	4514.16	6238.84	11223.1	9931.29	7894.38	10473.5	40755.9	62165.9	157.7	83.1	41.2	903.7	1045.3	183.5	274	679.3	586.1	338	450.6	1762.9	2843.2
1405	2	B5XKI1	Elongation factor Tu OS=Streptococcus pyogenes serotype M49 (strain NZ131) OX=471876 GN=tuf PE=3	QVIAKPGSINPHTKF	S	302	M P L	yes	1674.36	657.396	369.992	12416.1	8833.45	862.375	825.578	20492.6	21439.2	767.296	1061.43	8069.45	19191.8	4.4	2.1	1.1	34.3	24.4	2.6	2.2	48.8	52.9	2.1	2.8	21	50.5
5621	1	B5XJY9	Probable manganese-dependent inorganic pyrophosphatase OS=Streptococcus pyogenes serotype M49 (strain NZ131) OX=471876 GN=ppaC PE=3	QVNTVDISEVLERQE	S	227	P L	yes	45.876	38.8382	7.10548	2193.03	5049.94	82.8842	108.01	861.933	1284.65	72.904	140.783	820.801	1484.41	1.2	1	0.2	64.2	148.7	2.2	3.2	22.8	35.8	1.9	3.6	22.3	41.4
377	2	B5XK64	Ribosome-recycling factor OS=Streptococcus pyogenes serotype M49 (strain NZ131) OX=471876 GN=frr PE=3	RAGRANASLLDRIQV	S	35	M L	yes	4157.9	3932.47	2523.46	22244.9	41279.9	5927.69	5126.85	19775.3	28081	4647.22	5430.37	20766.8	32045.5	112.3	131.1	85.4	745.2	1526.8	195.8	173.4	611.2	826.1	147.6	170.4	628.9	1110.3
441	2	B5XJR0	30S ribosomal protein S7 OS=Streptococcus pyogenes serotype M49 (strain NZ131) OX=471876 GN=rpsG PE=3	RARRVGGSNYQVPVE	S	83	M P	yes	5467.07	2954.99	2057.37	34677.9	46863.3	5383.91	6252.75	47591.8	58662.7	9208.81	12537.7	64016.1	79098.2	40.7	26	18.1	340.5	500	52	64.3	482.5	667.6	79.4	117.2	681.7	889.8
3580	2	A0A0H3BYR4	Putative cytoplasmic membrane protein OS=Streptococcus pyogenes serotype M49 (strain NZ131) OX=471876 GN=lemA PE=3	RARVANASTPQETMA	S	82	P	yes	821.97	702.144	242.924	4081.28	8628.73	1504.02	271.464	3142.27	2826.27	1591.63	1975.35	4165.5	8285.27	35.6	29	12.2	255.7	361.3	61.4	28	125.5	128.6	70.3	84.9	202.9	350.2
1366	2	B5XJ52	50S ribosomal protein L18 OS=Streptococcus pyogenes serotype M49 (strain NZ131) OX=471876 GN=rplR PE=3	RAVAKGISEVVFDRG	S	89	M L	yes	1187.96	768.991	403.171	7283.08	15296.3	929.494	1057.44	4499.21	5995.14	1471.11	2064.47	8016.74	12418.8	40.4	33.6	16.1	349.4	739.5	38.1	41.6	237.3	256	46.6	64.7	272.7	442.6
4755	1	A0A0H3BZQ5	SSU ribosomal protein S1p OS=Streptococcus pyogenes serotype M49 (strain NZ131) OX=471876 GN=rpsA PE=4	RAVKGGLSIEFEGLR	S	123	M P	yes	70.0689	81.4887	28.794	1599.02	3348.09	32.7072	399.093	1459.8	1677.03	61.0825	111.865	838.556	1018.51	1	1.1	0.4	23.1	48.5	0.5	5.3	20.3	25.3	0.9	1.7	13	15.9
2865	1	A0A0H3BY55	Non-specific serine/threonine protein kinase OS=Streptococcus pyogenes serotype M49 (strain NZ131) OX=471876 GN=Spy49_1257c PE=4	RDLMTALSYNRSRER	S	274	M P L	yes	445.05	380.606	195.137	3720.59	6518.28	430.182	353.952	2112.41	2751.53	849.561	1140.48	4745.1	7100.56	40.7	31.1	18.5	323.6	547	39	33.7	171.7	357.2	81.9	106.8	478.6	734.5
143	3	B5XK64	Ribosome-recycling factor OS=Streptococcus pyogenes serotype M49 (strain NZ131) OX=471876 GN=frr PE=3	RFAQSHQSLSREYAS	S	19	M P L	yes	7008.82	5978.19	2845.54	42409.1	59854.2	8718.98	7648.88	41488.6	54924.7	10358.6	13059.7	47688.6	74412.1	189.3	199.3	96.3	1420.7	2213.8	288	258.7	1282.3	1615.8	329	409.8	1444.2	2578.2
6160	1	B5XKM5	Septation ring formation regulator EzrA OS=Streptococcus pyogenes serotype M49 (strain NZ131) OX=471876 GN=ezrA PE=3	RINIEAVSRLSEVAT	S	478	M	yes	127.866	76.3683	32.2622	1273.7	2720.23	136.924	87.1298	279.669	496.021	128.904	180.301	997.386	1597.53	12.3	8.1	3.4	126.1	251.9	15.1	9	27.3	46.9	12.8	17.8	96.2	157
6859	1	A0A0H3BZ90	Alkyl hydroperoxide reductase protein F OS=Streptococcus pyogenes serotype M49 (strain NZ131) OX=471876 GN=nox3 PE=3	RISIENITLDRQPSF	T	57	P L	yes	101.422	58.2559	0	899.397	2942.84	80.7557	67.5812	573.479	523.668	111.339	176.333	919.899	1572.56	4.9	3	0	34.8	111.6	3.5	4.3	28.1	31.2	5.3	7.8	39.7	73.3
1025	1	A0A0H3BZ76	Putative phosphoprotein phosphatase (PppL protein) OS=Streptococcus pyogenes serotype M49 (strain NZ131) OX=471876 GN=pppL PE=4	RIYDLGQSEDFKGMG	S	91	M P L	yes	1054.7	1106	587.553	13600.9	28469.3	1754.96	1430.55	5884.36	8576.18	2172.84	2885.74	10174.8	11348.9	51.1	58.3	33.7	954.1	2159	97.8	86.7	363.4	523.9	106.9	142.4	526.1	601.5
2650	1	B5XKT9	50S ribosomal protein L35 OS=Streptococcus pyogenes serotype M49 (strain NZ131) OX=471876 GN=rpmI PE=3	RKAGLVSSGDFKRIK	S	52	M	yes	667.249	839.585	671.09	2092.38	3397.11	845.299	1040.56	4152.7	6058.99	766.556	958.823	2983.39	3712.12	86.2	105.8	85.5	313.2	700.5	149.9	194.3	859.9	2123.5	119.9	155.7	1752.7	4311.6
3481	1	A0A0H3BZ33	Xaa-His dipeptidase OS=Streptococcus pyogenes serotype M49 (strain NZ131) OX=471876 GN=Spy49_1193c PE=4	RKKTGDQSPAQSSGG	S	384	M P	yes	460.379	534.234	258.913	10588.5	19044.8	795.819	284.622	407.175	473.83	761.756	950.4	2204.68	3592.43	63.8	80.9	33	397.7	747.7	104.4	79.2	179.7	196.8	82	107.4	268.2	459.3
2024	3	A0A0H3BZ61	F420_ligase domain-containing protein OS=Streptococcus pyogenes serotype M49 (strain NZ131) OX=471876 GN=Spy49_0453 PE=4	RKTEVIDSQGETIKF	S	189	M P L	yes	365.68	0	0	0	0	269.058	2048.98	67316.3	73020.2	0	0	0	1034.43	2686.2	619.1	376.4	2570.9	1250.2	1641	88.7	1323.4	1953.7	1839	1846.4	2705.7	3593.2
3822	2	A0A0H3BWE7	Alcohol dehydrogenase OS=Streptococcus pyogenes serotype M49 (strain NZ131) OX=471876 GN=adhP PE=3	RKVLDFIS-------	S	338	M L	yes	860.211	231.298	750.413	4092.63	6359.33	212.955	154.797	215.573	185.755	1354.43	1497.67	1696.92	1674.51	86.9	57.6	39	110.8	173.3	49.4	55.7	65.4	56.9	118	150.9	178.6	173.8
3329	1	A0A0H3C281	50S ribosomal protein L13 OS=Streptococcus pyogenes serotype M49 (strain NZ131) OX=471876 GN=rplM PE=3	RLSAVVASVLRGKNK	S	36	M	yes	0	0	0	70.4615	245.921	8.64238	8.9553	111.989	341.516	9.80768	18.4994	5083.76	9121.59	0	0	0	0.8	3.1	0.1	0.1	1.2	3.9	0.1	0.2	57.1	99.7
2323	1	A0A0H3BYS4	Dihydropteroate synthase OS=Streptococcus pyogenes serotype M49 (strain NZ131) OX=471876 GN=folP PE=3	RPGCRFVSATDEIDR	S	67	M L	yes	693.149	925.849	559.908	3915.27	7955.55	1439.25	2084.14	4060.03	6893.58	934.107	1243.92	4190.01	6536.15	92.5	96	62.1	395	791.2	148.4	196	295.7	685.6	113.6	142.4	513.3	797.2
1239	1	B5XLC6	Elongation factor 4 OS=Streptococcus pyogenes serotype M49 (strain NZ131) OX=471876 GN=lepA PE=3	RRRGDFVTMDYIDDN	T	440	M P L	yes	1607.75	1502.81	648.258	13344.5	22342	1794.1	906.034	2637.08	2022.22	3283.63	4529.68	13021.9	14379.8	36.8	48.5	19.2	396.3	598.9	50.9	22.1	69	48.1	74.2	100.3	295.4	331.7
5296	1	A0A0H3BYE4	Signal recognition particle protein OS=Streptococcus pyogenes serotype M49 (strain NZ131) OX=471876 GN=ffh PE=3	RRRIAAGSGNSFVEV	S	406	M P	yes	414.471	250.853	145.112	2062.24	4612.55	386.748	445.189	1030.26	1501.52	338.053	507.639	3603.14	6142	19.5	12	7.4	106.2	246.7	19.7	24.9	50.5	87.3	17	26.2	192.7	333
1474	2	B5XK61	50S ribosomal protein L11 OS=Streptococcus pyogenes serotype M49 (strain NZ131) OX=471876 GN=rplK PE=3	RSMGFTVTD------	T	140	M	yes	1356.78	1666.84	1001.92	12099.3	19097	2115.62	448.358	1698.51	2171.03	1709.35	2634.77	7463.8	6312.51	15.9	19.3	11.4	165.4	330.3	29.5	7	26.4	36.6	22.4	38.3	143.1	147.9
5706	1	A0A0H3C124	Putative mannose-specific phosphotransferase system component IID OS=Streptococcus pyogenes serotype M49 (strain NZ131) OX=471876 GN=manN PE=4	RSQFLQGSWNYERMQ	S	25	M P	yes	22.2274	86.1647	3.62514	1518.6	3978.02	34.4413	64.4484	1953	2555.85	106.337	145.665	1741.16	5094.79	0.8	3.2	0.1	41.7	124.5	1.3	1.6	37.9	60.2	3.9	5.6	69.8	205.9
2755	2	A0A0H3BZJ0	Formate acetyltransferase OS=Streptococcus pyogenes serotype M49 (strain NZ131) OX=471876 GN=pfl PE=3	RVFHEVLSMDDAAEA	S	764	M P L	yes	151.564	21.0627	5.39678	15414	18737.3	35.3364	146.461	375.992	519.211	342.314	450.393	2354.42	3946.37	4.1	0.8	0.1	167.3	218.6	1	3.8	11.8	17.7	13	19.3	108.6	188.8
2592	2	B5XJ36	50S ribosomal protein L3 OS=Streptococcus pyogenes serotype M49 (strain NZ131) OX=471876 GN=rplC PE=3	RYHRRPGSMGPVAPN	S	143	M P L	yes	1949.99	1073.58	682.343	3545.22	3056.23	3388.33	5805.82	4506.17	5573.28	3650.82	3857.5	16655.3	24969.2	37.9	22.1	14.5	86.3	88.4	84.9	146.7	108.2	160.9	73	82.9	451.6	722.9
1968	1	B5XIK9	30S ribosomal protein S15 OS=Streptococcus pyogenes serotype M49 (strain NZ131) OX=471876 GN=rpsO PE=3	RYRELIQSLGLRR--	S	84	M L	yes	300.893	242.133	81.3788	2783.26	7538.83	236.716	326.013	1879.07	2581.54	400.569	527.171	5807.28	10912.5	6.2	5.4	1.8	66.2	204.2	5.9	8.5	46.6	76.1	9.1	12.3	149.6	280.5
5482	1	A0A0H3BXF8	Putative sugar ABC transporter OS=Streptococcus pyogenes serotype M49 (strain NZ131) OX=471876 GN=Spy49_0973c PE=4	SAKVSDISVGAQQRV	S	143	P	yes	224.914	264.533	208.175	1384.28	3281.77	635.3	566.018	1049.82	1804.27	230.938	198.865	1127.34	2192.82	29.8	38.2	28.1	131.5	304.5	97.7	70.7	141.1	250	31.7	28.2	163.5	290.2
2686	1	B5XIW8	Co-chaperonin GroES OS=Streptococcus pyogenes serotype M49 (strain NZ131) OX=471876 GN=groES PE=3	SDIIAIVTK------	T	95	M P L	yes	487.439	300.376	108.831	2454.63	5060.28	489.714	607.629	3666.7	4341.36	587.47	743.086	2909	5164.68	3.8	2.8	1.1	25.4	56.4	4.3	7.3	39.3	55.1	5.1	6	24.4	46.7
628	1	A0A0H3C114	Inosine-5'-monophosphate dehydrogenase OS=Streptococcus pyogenes serotype M49 (strain NZ131) OX=471876 GN=guaB PE=3	SDRYFQGSVNEANKL	S	411	M P L	yes	2167.07	2501.86	1618.38	19216.5	19522.7	3805.05	2469.91	9982.94	12291.2	3416.11	4843.78	12959.4	15393.3	36.3	51.7	32.9	400.2	422.3	80	63.6	265.6	322.3	63.5	86.4	230.2	274.3
1954	1	A0A0H3BZR7	Mid-cell-anchored protein Z OS=Streptococcus pyogenes serotype M49 (strain NZ131) OX=471876 GN=mapZ PE=3	SEIKAGVTKDDSILD	T	42	M P	yes	4743.19	1029.67	1151.91	1119.81	381.445	3730.71	4475.91	6068.89	4732.84	2841.97	1409.21	804.026	591.615	351.9	92.6	107.5	99.8	39	289.9	342.7	580.9	596.5	210.5	106.9	70.6	63.2
54	5	A0A0H3C124	Putative mannose-specific phosphotransferase system component IID OS=Streptococcus pyogenes serotype M49 (strain NZ131) OX=471876 GN=manN PE=4	SEITKDMSGGILQDI	S	174	M P L	yes	38986.8	31921.3	20384.2	197538	382037	37660.2	41726.3	148072	153818	56121.5	73170.8	220227	339042	1403.2	1185.5	562.3	5424.3	11956.6	1421.5	1035.9	2873.5	3623	2058.3	2813	8828.5	13702
3253	2	B5XKM5	Septation ring formation regulator EzrA OS=Streptococcus pyogenes serotype M49 (strain NZ131) OX=471876 GN=ezrA PE=3	SFEAGVQSSFEHALR	S	524	M P L	yes	302.513	124.452	17.08	4957.43	9937.1	102.466	394.988	1118.68	1264.91	634.448	939.998	6427.02	5864.04	29.1	13.2	1.8	490.8	920.2	11.3	40.8	109.2	119.6	63	92.8	619.9	576.3
9074	1	A0A0H3BWG0	DNA-directed RNA polymerase subunit beta' OS=Streptococcus pyogenes serotype M49 (strain NZ131) OX=471876 GN=rpoC PE=3	SGARGNISNFSQLAG	S	731	P	yes	88.6566	60.8683	24.4312	554.337	1296.41	79.1535	435.127	2249.08	2046.08	101.487	109.685	440.176	882.82	3.9	3.2	1.2	25.5	57.3	4.2	16.2	114.8	96.9	4.6	5.4	21.5	41.9
255	1	B5XJR1	Elongation factor G OS=Streptococcus pyogenes serotype M49 (strain NZ131) OX=471876 GN=fusA PE=3	SGVLNSGSYVMNTSK	S	338	M P L	yes	2270.06	1764.78	910.66	11185.3	23890.7	3213.01	5197.56	27639.1	31418.5	3289.12	3886.73	24929.3	52489.3	20.7	14.5	7.8	96.3	233.7	30.6	44.7	164.1	256.1	30.5	36.7	235	506.3
6020	1	B5XIF1	Phosphoglycerate kinase OS=Streptococcus pyogenes serotype M49 (strain NZ131) OX=471876 GN=pgk PE=3	SIIGGGDSAAAAINL	S	357	P L	yes	0	0	0	1677.55	5893.03	10.1661	1095.87	4016.66	6576.19	20.4811	31.0124	118.959	516.37	0	0	0	18.4	67.2	0.1	10.8	33.7	63.4	0.2	0.3	1.2	5.3
1251	3	B5XKI1	Elongation factor Tu OS=Streptococcus pyogenes serotype M49 (strain NZ131) OX=471876 GN=tuf PE=3	SIREGGRTVGSGIVS	T	387	M P L	yes	1788.52	1283.49	739.985	22624.1	33378.9	2587.13	1988.89	15957.4	16981.1	2740.34	4359.43	32931	40549.9	4.7	4.1	2.2	62.5	92.2	7.8	5.3	38	41.9	7.5	11.5	85.7	106.7
1920	2	A0A0H3BY61	Ribonuclease Y OS=Streptococcus pyogenes serotype M49 (strain NZ131) OX=471876 GN=rny PE=3	SKEKVLDSKEQSLTD	S	129	M P L	yes	680.082	531.987	222.485	5349.53	6111.46	1180.18	1180.09	2948.28	2976	1025.56	1291.62	6434.58	11218.5	71.8	56.2	23.7	578.6	761.3	134.5	131.1	331.4	360.8	119.7	141.5	734.1	1349.3
8307	2	B5XKM5	Septation ring formation regulator EzrA OS=Streptococcus pyogenes serotype M49 (strain NZ131) OX=471876 GN=ezrA PE=3	SLHLIGQSQTSFREW	S	65	P	yes	237.021	49.9694	7.59112	1144.41	1910.32	12.6949	221.697	514.264	512.943	306.147	295.775	2354.54	5053.07	22.8	5.3	0.8	113.3	176.9	1.4	22.9	50.2	48.5	30.4	29.2	227.1	496.6
1730	2	A0A0H3BYQ9	PTS system, IIB component OS=Streptococcus pyogenes serotype M49 (strain NZ131) OX=471876 GN=Spy49_0834 PE=4	SNTKVHLSQLVN---	S	159	M L	yes	1357.1	699.062	536.979	11150.8	17040.4	1020.12	677.819	1743.27	2153.8	1508.41	1527.9	3622.24	4138.73	57.3	39.8	18.3	199.6	328.6	55.4	64.2	146.5	205.1	77.5	82.3	207.9	241.1
9406	1	B5XKP7	ATP synthase subunit b OS=Streptococcus pyogenes serotype M49 (strain NZ131) OX=471876 GN=atpF PE=3	SQASKIISDAKEIGQ	S	82	M	yes	7.29953	57.1461	39.1147	916.815	871.271	34.9117	9.57538	99.354	91.9054	23.6632	57.6489	846.549	2079.48	0.5	5.6	3.6	89	83	3.2	1.1	12.3	12.3	1.8	4.3	65.7	173.8
541	3	B5XIW7	Chaperonin GroEL OS=Streptococcus pyogenes serotype M49 (strain NZ131) OX=471876 GN=groEL PE=3	SQLETTTSDFDREKL	S	356	M P L	yes	5983.32	4193.95	2186.72	42177	64822.7	7276.13	6048.78	31895.2	43641.8	9194.62	12526.2	56082.4	94717.5	24.2	20.5	11.8	230.1	352.2	33.3	37.1	152.2	251	41.4	53.3	252.4	429
231	3	B5XJX2	UPF0154 protein Spy49_0296 OS=Streptococcus pyogenes serotype M49 (strain NZ131) OX=471876 GN=Spy49_0296 PE=3	SQMGQKPSEAKIQQT	S	56	M P L	yes	6559.64	5032.29	1651.54	92439.3	86158.9	8829.58	4992.66	15227	10886.3	14961	19801.7	68946.4	141613	2729.6	2161.6	679.5	37097.9	38988.6	3633.9	1890	5779.7	4813.2	6520.1	8313.8	32419.8	67086.7
1924	3	B5XKM2	50S ribosomal protein L19 OS=Streptococcus pyogenes serotype M49 (strain NZ131) OX=471876 GN=rplS PE=3	SRKGQGISEMYTVRK	S	56	M L	yes	87.7389	51.0364	17.1111	576.59	1242.75	51.9891	229.296	654.893	1334.3	171.126	478.658	37198.9	62793.9	1.6	0.9	0.3	10.9	24.9	1.1	4.8	12.7	31.1	3.3	9.4	762.6	1226.1
5024	1	A0A0H3BXP9	Putative rhamnosyltransferase OS=Streptococcus pyogenes serotype M49 (strain NZ131) OX=471876 GN=rgpAc PE=4	SRLTTADSKVRAYFQ	S	196	M	yes	193.275	187.241	96.6327	1658.97	1257.87	253.216	180.57	818.404	864.153	312.246	387.334	1829.19	2778.79	289.6	239.1	142.7	2063.5	1525.6	350.6	208.3	492.7	600.3	415	505.9	1721.9	2177.6
1055	2	A0A0H3BXI0	Uncharacterized protein OS=Streptococcus pyogenes serotype M49 (strain NZ131) OX=471876 GN=Spy49_1001c PE=3	SSTSQFVSEQTEKLK	S	141	M P L	yes	823.065	531.529	300.073	17080.6	16979.4	1061.11	674.67	2725.81	4730.39	2377.95	4890.06	14067.4	22377	24.7	16.4	10	427.1	414.2	35.8	39.8	92.5	150.8	69.6	151.6	434.3	717.9
859	1	B5XKI1	Elongation factor Tu OS=Streptococcus pyogenes serotype M49 (strain NZ131) OX=471876 GN=tuf PE=3	SVNQPKDYASIDAAP	Y	50	M P L	yes	2739.86	2566.97	1883.6	11836.9	17666.9	2885.64	2551.79	6047.01	8267.66	2740.34	3866.62	9145.37	17063.6	7.2	8.2	5.6	32.7	48.8	8.7	6.8	14.4	20.4	7.5	10.2	23.8	44.9
164	4	B5XLJ8	L-lactate dehydrogenase OS=Streptococcus pyogenes serotype M49 (strain NZ131) OX=471876 GN=ldh PE=3	SVRDAAYSIINKKGA	S	225	M P L	yes	13967.1	11994.9	7756.93	77083.5	133731	18728.6	14989.7	50778.7	74926.5	19792.7	23071.6	73023.5	113223	178.1	152.6	98.7	1121.6	2182	268.5	184.3	523.9	894	262.9	328.2	1089.9	1719.2
3453	1	B5XI23	Protein translocase subunit SecA OS=Streptococcus pyogenes serotype M49 (strain NZ131) OX=471876 GN=secA PE=3	SYADQMASLSDRDLQ	S	35	P L	yes	353.974	211.343	90.5929	6278.07	4611.29	442.996	576.978	603.875	621.543	1006.69	1288.52	3791.67	3828.43	13.8	9.8	4.2	318.2	239.8	21.9	30.3	31.1	34.7	46.4	61.4	190.1	204
1652	2	B5XMM9	Glycine--tRNA ligase beta subunit OS=Streptococcus pyogenes serotype M49 (strain NZ131) OX=471876 GN=glyS PE=3	SYEADLRSQFVIADA	S	208	M P L	yes	1631.82	1790.19	1091.43	11411.2	14711.4	3115	3512.88	3171.72	3828.84	1979.96	2320.35	4802.7	3969.39	202.3	245.9	147.9	1266.1	1858.1	425	446.8	294.6	442.6	292.1	339.1	698.2	592.2
561	1	B5XI32	Elongation factor P OS=Streptococcus pyogenes serotype M49 (strain NZ131) OX=471876 GN=efp PE=3	TAEGTYVSRA-----	S	183	M P L	yes	2494.69	1923.18	836.565	25005.1	36696.2	2589.66	3107.69	16105.1	14864.8	3267.21	4350.2	21561.2	28977.6	67.8	53.4	23.7	622.4	877.5	70.3	74.6	357.7	347.3	89	115.2	609.4	834.7
1493	1	B5XJ63	50S ribosomal protein L17 OS=Streptococcus pyogenes serotype M49 (strain NZ131) OX=471876 GN=rplQ PE=3	TALQKLFSEIAPRYA	S	93	M L	yes	728.176	521.506	230.998	5087.61	11443.3	453.059	601.059	2525.68	4816.13	836.163	1037.77	5568.6	10230.1	7.7	5.9	2.7	66.5	175.5	6.3	8.4	32.7	78.1	9.6	12.4	82.3	160.5
1022	2	A0A0H3BZL9	PTS system, fructose-specific IIABC component OS=Streptococcus pyogenes serotype M49 (strain NZ131) OX=471876 GN=fruA PE=4	TAVSTEKTSLGGAFY	T	283	P L	yes	1954.68	544.731	365.413	4640.33	4238.22	2015.28	3111.5	2012.43	1772.4	3466.28	4189.04	20127.8	35060.2	32.6	12.3	7.6	106.6	100.9	30.3	43.8	32.1	28.2	64.1	78.5	398.4	709.1
398	2	A0A0H3BZ76	Putative phosphoprotein phosphatase (PppL protein) OS=Streptococcus pyogenes serotype M49 (strain NZ131) OX=471876 GN=pppL PE=4	TDIGQKRSNNQDFIN	S	14	M P L	yes	6986.6	7381.58	4857.34	36386.6	60150.7	8981.17	7095.02	24102.6	23751	8923.09	9994.7	23090.1	20835.5	338.5	389.1	278.6	2552.5	4561.6	500.5	430	1488.5	1450.9	439	493.2	1193.9	1104.3
3802	2	B5XHZ0	Chaperone protein DnaK OS=Streptococcus pyogenes serotype M49 (strain NZ131) OX=471876 GN=dnaK PE=3	TEGKGFDTERDAAQS	T	530	P	yes	209.919	154.648	33.0195	2782.06	6974.01	50.0471	610.05	5946.92	5462.54	273.157	372.578	2605.44	3770.71	1.1	1	0.2	16.1	45.7	0.3	4.1	29.5	32.8	1.6	2.1	15.9	23.5
188	2	B5XHZ0	Chaperone protein DnaK OS=Streptococcus pyogenes serotype M49 (strain NZ131) OX=471876 GN=dnaK PE=3	TERDAAQSALDELKA	S	537	M P L	yes	6660.17	5984.88	3054.3	46914.9	89685.5	8841.65	6115.38	43241.2	62969.1	9594.65	10911.2	32330.4	53993.4	34.9	38.7	18.5	271.5	587.7	53	41.1	214.5	378.1	56.2	61.5	197.3	336.5
7322	1	B5XJ70	Tyrosine--tRNA ligase OS=Streptococcus pyogenes serotype M49 (strain NZ131) OX=471876 GN=tyrS PE=3	TGKKFGKSEGNAVWL	S	233	P	yes	157.592	172.463	56.7243	1564.65	2770.43	247.911	611.398	1786.83	2202.89	275.785	385.639	695.171	1365.45	13	13.7	5	166.7	316	21.3	59.9	187.4	234.1	24.3	33.6	62.4	120.8
2141	1	A0A0H3BYL1	Pyruvate kinase OS=Streptococcus pyogenes serotype M49 (strain NZ131) OX=471876 GN=pyk PE=3	TIDRNAQTLLNEYGR	T	365	M P	yes	425.593	343.993	159.549	3486.89	5875.9	531.326	432.92	4278.94	7428.82	602.291	826.904	5028.19	10057	4.4	3.7	1.6	39.7	75.4	6.1	4.1	35.4	67.5	6.7	9	58.6	117.5
4474	3	A0A0H3BXI0	Uncharacterized protein OS=Streptococcus pyogenes serotype M49 (strain NZ131) OX=471876 GN=Spy49_1001c PE=3	TISDTVNSDEAAK--	S	157	M P L	yes	3515.52	1448.74	948.231	15992.9	29195.3	2984.74	2344.39	11242.1	14028.1	3563.52	3632.06	11715.8	16757	105.5	44.7	31.6	399.9	712.2	100.7	138.3	381.5	447.2	104.3	112.6	361.7	537.6
4916	1	B5XJR0	30S ribosomal protein S7 OS=Streptococcus pyogenes serotype M49 (strain NZ131) OX=471876 GN=rpsG PE=3	TIVYDAFSAIKEATG	S	48	P L	yes	40.2978	45.4614	22.7334	1751.72	3739.69	62.1221	670.979	3176.07	3549.99	69.588	139.071	1671.54	1822.33	0.3	0.4	0.2	17.2	39.9	0.6	6.9	32.2	40.4	0.6	1.3	17.8	20.5
1752	1	A0A0H3BZ43	Uncharacterized protein OS=Streptococcus pyogenes serotype M49 (strain NZ131) OX=471876 GN=Spy49_1003c PE=3	TIYDSIKSIVEEEVK	S	99	M	yes	899.11	580.281	224.941	6494.27	9735	1066.77	919.167	2064.84	4068.63	1202.3	1570.11	4341.58	7631.46	23.2	16	6.4	144.8	214.6	28.6	38.5	66.5	130.7	32.6	41.7	121.1	217
2407	2	B5XKI1	Elongation factor Tu OS=Streptococcus pyogenes serotype M49 (strain NZ131) OX=471876 GN=tuf PE=3	TKFKGEVYILSKDEG	Y	314	M P L	yes	342.483	375.655	336.357	5827.97	9847.13	265.346	525.368	2519.59	2836.94	255.765	265.356	1882.87	5776.56	0.9	1.2	1	16.1	27.2	0.8	1.4	6	7	0.7	0.7	4.9	15.2
3687	2	A0A0H3C0S1	Putative sugar ABC transporter OS=Streptococcus pyogenes serotype M49 (strain NZ131) OX=471876 GN=Spy49_0972c PE=4	TLGFEIRSVGLNPHA	S	223	M	yes	355.871	42.7218	17.9853	7848.68	15365.5	176.849	137.254	204.596	503.238	201.653	368.302	1569.23	6119.35	683	99.3	31.2	9993.3	20636	414	232	418.5	762.5	394.2	695.4	3153.5	12324.6
907	1	B5XHZ0	Chaperone protein DnaK OS=Streptococcus pyogenes serotype M49 (strain NZ131) OX=471876 GN=dnaK PE=3	TLGRFQLTDIPAAPR	T	430	M P L	yes	896.928	726.846	313.685	6289.88	16588.1	1101.04	1011.79	5503.42	7560.95	1263.35	1738.7	10094	20634.6	4.7	4.7	1.9	36.4	108.7	6.6	6.8	27.3	45.4	7.4	9.8	61.6	128.6
811	2	A0A0H3BZ03	R3H domain protein OS=Streptococcus pyogenes serotype M49 (strain NZ131) OX=471876 GN=Spy49_0209 PE=4	TMDPMSNSERKIVHK	S	270	M P L	yes	2479.74	3066.86	1574.47	30706.2	36372.7	4725.73	2613.94	4977.94	3451.63	5818.02	7760.95	31205.6	33938.5	88.3	131.8	69.6	1484.2	1990.3	192.1	114.8	301.3	203.7	249.1	333.9	1349.8	1552.2
4920	2	B5XI23	Protein translocase subunit SecA OS=Streptococcus pyogenes serotype M49 (strain NZ131) OX=471876 GN=secA PE=3	TMEGRRFSDGLHQAI	S	331	P L	yes	148.772	38.818	8.6279	1047.66	1569.15	32.365	380.843	856.298	1010.23	219.129	283.307	2957.94	6253.11	5.8	1.8	0.4	53.1	81.6	1.6	20	44.1	56.4	10.1	13.5	148.3	333.2
4986	1	A0A0H3C052	NADH oxidase OS=Streptococcus pyogenes serotype M49 (strain NZ131) OX=471876 GN=nox1 PE=4	TNYIALASNAVRTGI	S	311	P L	yes	22.2592	8.54541	0	1748.55	5574.51	34.7884	50.9891	1418.51	2155.61	24.3824	43.3134	391.715	2561.97	0.5	0.2	0	28.1	95.9	0.7	1	25.9	50.1	0.6	1	9.3	58.8
2751	1	A0A0H3C002	Uncharacterized protein OS=Streptococcus pyogenes serotype M49 (strain NZ131) OX=471876 GN=Spy49_1390c PE=4	TPRSYTISEAGYRSG	S	318	P L	yes	1411.95	1196.87	1089.71	4851.65	6469.67	1814.96	2211.85	4840.02	4489.94	1711.6	1900.74	3145.94	3178.8	494.9	370.3	308.4	1257.5	1710.4	608.9	714.2	1281.7	1551.3	612.2	760	1233.6	1375
3086	1	A0A0H3BXT4	Putative sugar transferase OS=Streptococcus pyogenes serotype M49 (strain NZ131) OX=471876 GN=Spy49_0433 PE=4	TPTLYSKSLIESYGV	S	118	M	yes	1002.61	565.067	393.079	3194.74	4923.38	570.716	638.708	1391.91	1433.4	805.538	1158.98	3665.65	5297.85	583.1	350.7	258.8	2171.3	2826	326	174.5	392.1	411.3	526.9	706.3	2342.2	3253.5
2257	2	A0A0H3BZJ0	Formate acetyltransferase OS=Streptococcus pyogenes serotype M49 (strain NZ131) OX=471876 GN=pfl PE=3	TPYDGDESFLAGATE	S	45	M P L	yes	968.533	468.646	253.649	17026.4	31868.8	551.248	674.49	1153.47	1440.3	734.658	842.445	3197.76	3200.15	26.2	17.8	4.7	184.8	371.8	15.6	17.5	36.2	49.1	27.9	36.1	147.5	153.1
1289	2	A0A0H3BYM9	Glyceraldehyde-3-phosphate dehydrogenase OS=Streptococcus pyogenes serotype M49 (strain NZ131) OX=471876 GN=plr PE=3	TQGRFDGTVEVKEGG	T	57	M	yes	847.225	672.039	457.068	4951.41	12103.1	972.605	862.592	4163.29	7465.95	1037.09	1319.18	5207.71	8953.72	1.9	1.7	1.1	12.1	30.9	2.5	2.1	7.2	13	2.4	3	11.2	19
5047	2	A0A0H3BZ76	Putative phosphoprotein phosphatase (PppL protein) OS=Streptococcus pyogenes serotype M49 (strain NZ131) OX=471876 GN=pppL PE=4	TQSIGQASPVEPDLG	S	170	M P L	yes	383.902	223.857	40.1001	6976.52	14999.4	651.382	260.701	4218.15	4008.98	540.67	962.588	4668.7	5579.14	18.6	11.8	2.3	489.4	1137.5	36.3	15.8	260.5	244.9	26.6	47.5	241.4	295.7
208	1	B5XMJ7	Cell cycle protein GpsB OS=Streptococcus pyogenes serotype M49 (strain NZ131) OX=471876 GN=gpsB PE=3	TRVAQSATNFDILKR	T	86	M P L	yes	32301.4	18130.6	21304.4	11578.7	8540.31	33871.1	44729.4	28933.9	25082.5	21328.2	11445.8	6199.38	7456.14	2547.4	1373.8	1681.4	1170.6	930.8	2663.8	3877.5	5754.3	4537.3	1862.2	966.8	595	809.9
13368	1	A0A0H3C124	Putative mannose-specific phosphotransferase system component IID OS=Streptococcus pyogenes serotype M49 (strain NZ131) OX=471876 GN=manN PE=4	TSPEDRATALERHME	T	56	P	yes	2.77842	0	3.62514	447.932	623.064	21.1946	32.2242	736.883	335.402	8.17978	7.8035	299.34	858.617	0.1	0	0.1	12.3	19.5	0.8	0.8	14.3	7.9	0.3	0.3	12	34.7
2586	1	B5XIY6	Elongation factor Ts OS=Streptococcus pyogenes serotype M49 (strain NZ131) OX=471876 GN=tsf PE=3	TVEAYLDSVNAKAIA	S	308	M P L	yes	1069.68	693.9	403.081	4410.12	11432.9	696.051	1181.11	2339.86	2583.65	832.964	937.599	1461.93	3377.35	15.4	9.7	5.4	68	190.4	10.8	17.8	39.7	50	12.6	14.2	23.2	57.3
709	3	B5XKR6	30S ribosomal protein S21 OS=Streptococcus pyogenes serotype M49 (strain NZ131) OX=471876 GN=rpsU PE=3	TVVRKNESLDDALRR	S	11	M P L	yes	2320.9	1546.9	667.3	13269.8	15395.6	2460.5	3247.2	33485.6	52033	3022.4	3952.8	45535.4	37012.5	2320.9	1546.9	667.3	13269.8	15395.6	2460.5	3247.2	33485.6	52033	3022.4	3952.8	45535.4	37012.5
564	4	A0A0H3BVE1	30S ribosomal protein S5 OS=Streptococcus pyogenes serotype M49 (strain NZ131) OX=471876 GN=rpsE PE=3	VAALRGISVSDLA--	S	159	M	yes	3162.93	3879.69	2251.53	32481.8	61222.8	6014.8	3968.49	18300.7	17975.5	4463.1	7017.8	16842.9	22151.2	32.6	33.7	20.3	308.1	674.1	64.6	44.3	179.9	236.7	48.9	82	207.7	266.8
6314	2	A0A0H3BZL9	PTS system, fructose-specific IIABC component OS=Streptococcus pyogenes serotype M49 (strain NZ131) OX=471876 GN=fruA PE=4	VADGIKKSQELISLI	S	252	M P	yes	5.99594	8.85742	0	3077.59	2839.48	6.65108	42.6232	275.847	377.106	59.4838	74.7089	1899.61	5997.47	0.1	0.2	0	70.7	67.6	0.1	0.6	4.4	6	1.1	1.4	37.6	121.3
992	1	A0A0H3BVE1	30S ribosomal protein S5 OS=Streptococcus pyogenes serotype M49 (strain NZ131) OX=471876 GN=rpsE PE=3	VADITSKSLGSNTPI	S	126	M P L	yes	708.263	759.821	354.92	3700.46	10063	1061.44	1513.94	5849.3	11535.6	711.906	1822.92	23889.8	30428.8	7.3	6.6	3.2	35.1	110.8	11.4	16.9	57.5	151.9	7.8	21.3	294.6	366.5
1163	2	A0A0H3BZ23	Cell division protein FtsZ OS=Streptococcus pyogenes serotype M49 (strain NZ131) OX=471876 GN=ftsZ PE=3	VAGAQYASDQAKQSV	S	348	M P L	yes	3052.79	1316.67	778.544	20855.6	17075.8	3423.11	4119.07	11415.9	11692.9	4742.55	7396.53	26779.8	32560.6	48.5	24	13.7	362.5	287.9	62.8	66	156.7	180.8	84.5	128.7	462.1	572.5
738	2	A0A0H3C1H3	Fructose-bisphosphate aldolase class II OS=Streptococcus pyogenes serotype M49 (strain NZ131) OX=471876 GN=fba PE=4	VAKVNVNTESQIAFS	T	233	M P L	yes	5234.09	4915.66	3153.53	9170.07	23205.1	7254.7	8855.1	33940.1	42041.3	3465.68	3656.81	13783.1	19814.6	36.9	35.2	21.3	70.1	205.2	56.1	64	186.7	255.8	25	27.5	107.7	167.3
4337	1	A0A0H3BX75	Catabolite control protein A OS=Streptococcus pyogenes serotype M49 (strain NZ131) OX=471876 GN=ccpA PE=4	VAREAGVSMATVSRV	S	19	M L	yes	116.519	83.158	55.2213	779.401	1129.6	160.559	153.454	509.751	822.556	231.04	708.244	2980.82	3687.31	7.8	7.8	3.9	44.2	68.2	12.6	10.4	40.2	68.8	17	51.5	236.6	271.5
748	1	B5XJ99	30S ribosomal protein S4 OS=Streptococcus pyogenes serotype M49 (strain NZ131) OX=471876 GN=rpsD PE=3	VDPGQVISVREKSMK	S	141	M P L	yes	310.857	318.953	140.454	4123.94	12148.6	291.021	938.423	12396.3	20262	395.32	466.659	17393.8	29765.9	3.8	4	1.8	56.8	177.4	4.2	13.2	171	304.6	5.3	6.4	256.9	448.6
2336	1	A0A0H3BY05	Carbamate kinase OS=Streptococcus pyogenes serotype M49 (strain NZ131) OX=471876 GN=arcC PE=3	VEDATSKSLTGVEAV	S	205	M P L	yes	600.209	400.355	122.201	5893.23	14810.8	562.059	392.983	416.31	642.453	586.846	668.508	1289.83	1768.46	22.8	13.9	3.7	44.4	120.3	19.1	27.7	37.7	55.7	20.9	23.6	45.9	69.8
44	2	B5XKI1	Elongation factor Tu OS=Streptococcus pyogenes serotype M49 (strain NZ131) OX=471876 GN=tuf PE=3	VEDVFSITGRGTVAS	T	225	M P L	yes	3653.15	11739.2	5818.97	214440	246866	11807.9	32948.1	81886.6	83000.8	13226.7	24829.8	168152	131987	9.6	37.5	17.3	592.4	681.9	35.6	87.8	195	204.8	36.2	65.5	437.6	347.3
554	2	A0A0H3BYC1	DNA-directed RNA polymerase subunit alpha OS=Streptococcus pyogenes serotype M49 (strain NZ131) OX=471876 GN=rpoA PE=3	VEPARVGSNDGFDKL	S	185	M P L	yes	2772.52	2927.13	2201.42	21004.2	45303.1	4013.61	2828.18	12255.8	16768.4	3744.61	5028.9	15460.4	24027.8	70.4	95.5	64.7	649.7	1363	128.5	69.2	349	477.2	104	148	470.8	743.9
4894	1	A0A0H3BZN1	Uncharacterized protein OS=Streptococcus pyogenes serotype M49 (strain NZ131) OX=471876 GN=Spy49_1218c PE=4	VFDKAVESVETAVDK	S	34	M P	yes	537.889	513.152	244.203	1730.29	3524.54	876.801	1572.34	1470.79	1285.35	513.152	671.972	1273.96	902.478	41.4	42.9	20.8	145.1	373.5	83.3	143.2	240.3	256.1	47.1	66.8	149	120.4
1739	2	A0A0H3BWJ5	Transcription termination/antitermination protein NusG OS=Streptococcus pyogenes serotype M49 (strain NZ131) OX=471876 GN=nusG PE=3	VGSHGNRSKPTPLLE	S	105	M P L	yes	813.715	391.804	217.086	6514.65	6746.57	622.51	1252.31	19011.2	17274.4	1383.43	1765.94	3600.19	4250.46	69.5	34.6	17.8	557.5	566.2	64.6	99.4	1678	1400	129.5	164.3	375.4	485.4
2782	1	B5XJ44	50S ribosomal protein L29 OS=Streptococcus pyogenes serotype M49 (strain NZ131) OX=471876 GN=rpmC PE=3	VKELRGLSQEELAKK	S	17	M L	yes	857.74	1059.74	631.329	4602.68	8372.19	1238.48	1646.61	5202.75	6100.18	1100.47	1340.29	4613.93	3887.63	132.6	160.7	97.3	936.7	2296.9	240.4	316	1063.7	1728	178.6	245.4	1239.8	2216.4
7573	1	B5XIF1	Phosphoglycerate kinase OS=Streptococcus pyogenes serotype M49 (strain NZ131) OX=471876 GN=pgk PE=3	VKQPGVKSIIGGGDS	S	350	P	yes	0	0	0	1331.1	4893.32	0	60.8814	1489.86	3236.23	10.2405	10.3375	158.611	379.97	0	0	0	14.6	55.8	0	0.6	12.5	31.2	0.1	0.1	1.6	3.9
1179	2	A0A0H3C2S7	Uncharacterized protein OS=Streptococcus pyogenes serotype M49 (strain NZ131) OX=471876 GN=Spy49_1801c PE=4	VKTVGLDSKSPLKTI	S	137	M P	yes	3995.07	2544.04	1663.97	5101.41	3628.38	3342.08	4981.37	7971.78	6096.37	4152.57	3136.51	3652.24	5498.36	860.1	499.5	330.7	1044.4	792.4	679.5	769.2	1131.7	1166.5	1041.8	814.1	973.6	1574.3
4852	1	A0A0H3BZJ8	Cell division protein FtsA OS=Streptococcus pyogenes serotype M49 (strain NZ131) OX=471876 GN=ftsA PE=3	VKVDVVGSEEPVEVT	S	280	P L	yes	206.418	168.105	83.7636	2399.22	5030.53	350.034	575.764	1547.96	1584.9	263.917	442.529	1453.88	1674.42	13.9	10.3	5	144.8	294.6	23.6	29.9	86.9	91	17	30.5	107.4	135.5
6489	1	B5XIW7	Chaperonin GroEL OS=Streptococcus pyogenes serotype M49 (strain NZ131) OX=471876 GN=groEL PE=3	VLEKAFGSPLITNDG	S	45	P	yes	568.662	388.708	92.6578	3336.03	10840.6	568.106	831.504	6475.43	7372.17	688.486	916.551	3577.36	8080.79	2.3	1.9	0.5	18.2	58.9	2.6	5.1	30.9	42.4	3.1	3.9	16.1	36.6
1749	2	B5XIW7	Chaperonin GroEL OS=Streptococcus pyogenes serotype M49 (strain NZ131) OX=471876 GN=groEL PE=3	VLNKIRGTFSVVAVK	T	268	M P L	yes	1063.15	818.332	463.289	5443.96	8889.66	1398.42	1059.76	1613.62	1547.46	1265.93	1762.6	7199.17	7396.35	4.3	4	2.5	29.7	48.3	6.4	6.5	7.7	8.9	5.7	7.5	32.4	33.5
7188	1	A0A0H3BY55	Non-specific serine/threonine protein kinase OS=Streptococcus pyogenes serotype M49 (strain NZ131) OX=471876 GN=Spy49_1257c PE=4	VLRTNYQTDQVAVAR	T	50	M	yes	419.899	336.549	277.41	862.312	1139.21	455.552	494.692	1023.6	1016.03	544.59	506.168	1369.2	1704.33	38.4	27.5	26.3	75	95.6	41.3	47.1	83.2	131.9	52.5	47.4	138.1	176.3
10385	1	B5XJD9	Acetate kinase OS=Streptococcus pyogenes serotype M49 (strain NZ131) OX=471876 GN=ackA PE=3	VNMLNKKSGLSGVSG	S	272	P	yes	6.59148	0	0	1304.29	2652.77	2.33214	0	129.176	337.733	0	6.13591	40.5392	475.648	0.3	0	0	44.2	86.7	0.1	0	4.2	11.2	0	0.3	2	24.5
5483	2	B5XIG1	Trigger factor OS=Streptococcus pyogenes serotype M49 (strain NZ131) OX=471876 GN=tig PE=3	VNVTFPESYQAEDLA	S	222	P	yes	0	9.39262	44.7177	9207.58	13742.9	415.653	1224.56	1717.87	2826.11	31.8211	323.492	868.014	1518.02	0	0.2	0.9	185.8	326.5	9.5	24.9	30.7	60.9	0.7	7.5	20	38.7
5642	2	B5XJ35	30S ribosomal protein S10 OS=Streptococcus pyogenes serotype M49 (strain NZ131) OX=471876 GN=rpsJ PE=3	VPLPTERSLYTIIRA	S	47	M	yes	8.96012	0	0	305.549	1363.84	0	8.8769	497.241	1487.84	8.28872	15.6107	2158.55	3926.81	0.1	0	0	3.7	17.9	0	0.1	5.8	21.1	0.1	0.2	29.5	56.6
207	2	B5XKI2	Triosephosphate isomerase OS=Streptococcus pyogenes serotype M49 (strain NZ131) OX=471876 GN=tpiA PE=3	VRVQYGGSVKPENVK	S	214	M P L	yes	10581.6	6011.76	3093.81	32932.4	34892.7	14527.6	31481.9	150587	155318	12109.2	14195	43145.6	74324.1	94.7	51.6	29.9	391.4	440.4	122.5	253.9	943.7	1152.8	110.4	124.1	376.4	723.1
9644	2	A0A0H3BZD6	Putative PTS system enzyme II OS=Streptococcus pyogenes serotype M49 (strain NZ131) OX=471876 GN=Spy49_1737c PE=4	VSDAPVATAPHKTMQ	T	513	M P	yes	947.546	73.883	71.6701	7388.08	5583.78	675.208	746.636	2368.69	1780.58	1448.6	1066.22	4981.47	11764.7	83.4	10.4	5.7	438.6	345.2	87.1	209.1	903.7	755.5	135.7	108.7	535.5	1326.3
1014	2	A0A0H3BZ43	Uncharacterized protein OS=Streptococcus pyogenes serotype M49 (strain NZ131) OX=471876 GN=Spy49_1003c PE=3	VSLQDKVSDMARSTF	S	141	M P L	yes	3216.64	1617.53	667.793	15150.3	19379.3	2252.91	3182.47	9234.33	11984.9	4082.65	5037.92	16470	25398.3	83	44.6	19	337.8	427.2	60.4	133.3	297.4	385	110.7	133.8	459.4	722.2
612	2	A0A0H3BYM9	Glyceraldehyde-3-phosphate dehydrogenase OS=Streptococcus pyogenes serotype M49 (strain NZ131) OX=471876 GN=plr PE=3	VTLDKNVSVDEINAA	S	255	M P L	yes	2720.04	2213.77	1329.65	20378.5	42184.5	3657	2875.31	16074.9	26705.1	2981.63	3913.58	15716.1	29170.3	6.1	5.6	3.2	49.8	107.7	9.4	7	27.8	46.5	6.9	8.9	33.8	61.9
3239	2	A0A0H3BY45	Ribosome hibernation promoting factor OS=Streptococcus pyogenes serotype M49 (strain NZ131) OX=471876 GN=hpf PE=3	VVRTKNVTLKPMDVE	T	134	M P L	yes	834.575	459.626	157.064	3307.2	3606	1313.44	2108.04	6863.58	6918.28	948.872	1452.88	6498.2	10616.5	12	7.1	2.4	46.6	56.7	18.1	31.4	92.7	104.6	13.9	21.6	107.1	189.6
2376	1	B5XMC3	Arginine deiminase OS=Streptococcus pyogenes serotype M49 (strain NZ131) OX=471876 GN=arcA PE=3	VVVYNRNTITNAILE	T	371	M P L	yes	500.386	277.003	150.087	2997.66	7324.34	547.33	486.407	453.981	763.69	493.512	893.474	7100.23	10407.4	5.6	3.7	1.6	12	30	6.5	11.2	12.7	20.2	5.5	10.9	89	129.3
8380	1	A0A0H3BZ76	Putative phosphoprotein phosphatase (PppL protein) OS=Streptococcus pyogenes serotype M49 (strain NZ131) OX=471876 GN=pppL PE=4	WLFETIQSENQRIYD	S	80	P L	yes	47.4718	37.9418	1.74348	2650.05	6401.96	8.9722	123.75	906.781	1691.01	180.901	285.737	1493.06	1643.37	2.3	2	0.1	185.9	485.5	0.5	7.5	56	103.3	8.9	14.1	77.2	87.1
1459	2	B5XKI1	Elongation factor Tu OS=Streptococcus pyogenes serotype M49 (strain NZ131) OX=471876 GN=tuf PE=3	YETETRHYAHIDAPG	Y	80	M P L	yes	837.18	281.741	134.543	3040.68	3873.69	497.524	938.156	2813.54	3971.72	1315.36	1288.87	13641.2	50658.9	2.2	0.9	0.4	8.4	10.7	1.5	2.5	6.7	9.8	3.6	3.4	35.5	133.3
5877	2	B5XIY6	Elongation factor Ts OS=Streptococcus pyogenes serotype M49 (strain NZ131) OX=471876 GN=tsf PE=3	YGSKAQLSDDVITAA	S	240	M P L	yes	27.7838	28.6144	7.46447	4384.18	8862.91	51.5593	112.803	1603.13	2397.63	33.0541	92.4393	504.113	1821.29	0.4	0.4	0.1	67.6	147.6	0.8	1.7	27.2	46.4	0.5	1.4	8	30.9
500	4	A0A0H3BZL9	PTS system, fructose-specific IIABC component OS=Streptococcus pyogenes serotype M49 (strain NZ131) OX=471876 GN=fruA PE=4	YHAKNGKSETAVSTE	S	274	M P L	yes	3795.43	4495.14	3870.5	19353.6	5880.58	5513.74	4979.81	5962.06	6668.48	5942.97	6867.88	29004.4	58481.5	63.3	101.5	80.5	444.6	140	82.9	70.1	95.1	106.1	109.9	128.7	574.1	1182.8
2230	1	A0A0H3C2K4	Alkyl hydroperoxide reductase C OS=Streptococcus pyogenes serotype M49 (strain NZ131) OX=471876 GN=ahpC PE=3	YHDGKFITVTNEDVK	T	23	M P	yes	783.45	463.498	236.913	2628.17	7275.96	853.14	565.647	2565.71	3628.91	890.966	1105.58	3320.24	5199.92	11.2	7	4.3	29.9	73.4	11.5	10.9	39.1	64	12.5	13.8	37.5	60.3
3542	2	A0A0H3BZ03	R3H domain protein OS=Streptococcus pyogenes serotype M49 (strain NZ131) OX=471876 GN=Spy49_0209 PE=4	YHGKVLKSLQLLAQN	S	210	M P L	yes	84.2494	286.209	9.04868	3866.72	6518.69	127.922	366.589	247.823	181.308	1128.1	1036.65	4272.33	5116.36	3	12.3	0.4	186.9	356.7	5.2	16.1	15	10.7	48.3	44.6	184.8	234
4046	1	A0A0H3C052	NADH oxidase OS=Streptococcus pyogenes serotype M49 (strain NZ131) OX=471876 GN=nox1 PE=4	YMESPVQSIDYDAKT	S	83	M P	yes	373.954	316.18	159.635	4374.49	11869.8	536.735	433.408	2294.81	2456.8	585.177	731.996	3689.7	7089	8.4	7.4	3.3	70.3	204.2	10.8	8.5	41.9	57.1	14.4	16.9	87.6	162.7
72	4	A0A0H3BZP2	Arsenate reductase OS=Streptococcus pyogenes serotype M49 (strain NZ131) OX=471876 GN=arsC PE=3	YMKEDGESVNPIEVK	S	131	M L	yes	33394.2	42393.9	26481.7	32071.5	24692.2	69482.6	168128	208740	200910	31491.5	23626.5	17415.7	23074.1	38852.3	43833.3	21816.9	14897.4	10258.9	48977	75884.1	168819	135032	41226.7	33425.1	22760.8	30946.7
2756	1	A0A0H3BWX7	Beta sliding clamp OS=Streptococcus pyogenes serotype M49 (strain NZ131) OX=471876 GN=dnaN PE=3	YPRLQEVSTENPLIL	S	130	P L	yes	667.184	237.429	70.5342	3532.64	8133.35	592.972	1065.26	4133.34	7800.42	864.065	1073.21	3034.46	5317.65	47	14	4.2	226.7	593.2	39.3	61.7	192.1	397.1	56.6	76.5	219.7	346.7
1388	1	A0A0H3BWH3	Putative calcium-transporting ATPase OS=Streptococcus pyogenes serotype M49 (strain NZ131) OX=471876 GN=pacL PE=4	YQNSNVTYGRGIGVI	Y	210	M P L	yes	3626.03	3114.21	1603.62	2365.57	2243.62	5277.52	5134.31	2309.53	1018.04	5170.73	4914.81	5580.89	7662.34	288.2	214.7	117.9	160.4	189.1	414.9	380.7	138.6	69.2	455.3	462.8	512.7	747.8
2179	1	A0A0H3C1X8	Putative endopeptidase O OS=Streptococcus pyogenes serotype M49 (strain NZ131) OX=471876 GN=pepO PE=3	YQSLKSFSEFVANIA	S	100	M P L	yes	301.731	258.882	112.711	3835.69	9507.28	258.06	361.127	5227.32	6355.99	459.778	597.145	3011.39	5125.9	7.5	7.9	3.9	145.5	372.3	7.1	11.4	154.3	194	12.8	16.2	84.9	146.3
1131	1	A0A0H3BZR7	Mid-cell-anchored protein Z OS=Streptococcus pyogenes serotype M49 (strain NZ131) OX=471876 GN=mapZ PE=3	YTELDTASLDNFIKK	S	75	M P L	yes	908.47	720.543	436.117	16631.1	26394	1172.36	1149.34	2411.26	1923.29	1069.28	1374.93	6074.61	13917.9	67.4	64.8	40.7	1482.2	2698.6	91.1	88	230.8	242.4	79.2	104.3	533.4	1486.8
817	2	A0A0H3BXB3	Uncharacterized protein OS=Streptococcus pyogenes serotype M49 (strain NZ131) OX=471876 GN=Spy49_0911c PE=4	YVKHGYVTKPIKKKY	T	56	M L	yes	5932.4	2291.92	1164.39	4583.66	2454.89	5286	9090.97	9038.55	8748.18	7152.35	7902.76	8468.09	8353.39	359.1	110.9	76.4	336.8	159.8	297.4	817.1	919.5	1039.2	462.7	452.4	491	446.1
3731	3	B5XJ63	50S ribosomal protein L17 OS=Streptococcus pyogenes serotype M49 (strain NZ131) OX=471876 GN=rplQ PE=3	YVRNEIASENYDEAA	S	72	M P L	yes	463.385	318.207	427.775	3343.29	3912.22	388.337	944.522	3653.35	5383.46	557.442	753.221	15021	23666.2	4.9	3.6	5	43.7	60	5.4	13.2	47.3	87.3	6.4	9	222	371.3
6346	2	B5XJ48	50S ribosomal protein L5 OS=Streptococcus pyogenes serotype M49 (strain NZ131) OX=471876 GN=rplE PE=3	AAELALISGQKPLIT	S	62	P L	no	13.4257	0	0	244.558	589.58	0	54.9139	387.178	1280.74	0	23.106	3998.45	9676.83	0.1	0	0	2.2	6	0	0.5	3.1	12.2	0	0.2	37.4	92.5
2583	2	A0A0H3BYQ3	30S ribosomal protein S3 OS=Streptococcus pyogenes serotype M49 (strain NZ131) OX=471876 GN=rpsC PE=3	AEGYSEGTVPLHTLR	T	162	P	no	1265.23	350.136	509.706	1323.02	1884.84	637.443	3036	4695.16	5051.73	904.064	1747.05	8011.85	9365.56	13	3.6	5.4	14.5	21	7.6	34.7	51.3	58.4	9.7	18.4	82.5	93
3451	1	B5XJA2	50S ribosomal protein L9 OS=Streptococcus pyogenes serotype M49 (strain NZ131) OX=471876 GN=rplI PE=3	AKEATSQSIGELKGK	S	43	M	no	261.998	154.985	124.915	1840.58	2554.59	265.795	267.199	991.686	1603.6	311.138	584.17	4359.5	5940.88	23.1	13.3	11.7	208.7	340.6	23.8	30.6	109.4	216.2	30.5	57.4	445.7	860.5
2597	1	A0A0H3BZI9	UDP-glucose 6-dehydrogenase OS=Streptococcus pyogenes serotype M49 (strain NZ131) OX=471876 GN=Spy49_0459 PE=3	AKNINATSSEELAYK	S	64	M P L	no	51.4734	25.0776	62.2979	125.466	73.9735	6.50382	1219.21	17252.9	15815	6.51432	6.51597	12.6115	15.9144	13.2	5.5	12.6	22.6	11.3	1.2	26.2	207.2	218.9	1.5	1.3	2	2.6
4015	1	A0A0H3BZR7	Mid-cell-anchored protein Z OS=Streptococcus pyogenes serotype M49 (strain NZ131) OX=471876 GN=mapZ PE=3	AKYTELDTASLDNFI	T	73	M P L	no	319.447	13.3434	67.5071	87.5205	77.2671	314.003	1494.15	7284.97	9406.96	5.40043	32.9562	179.938	169.434	23.7	1.2	6.3	7.8	7.9	24.4	114.4	697.3	1185.6	0.4	2.5	15.8	18.1
6147	2	A0A0H3BZI9	UDP-glucose 6-dehydrogenase OS=Streptococcus pyogenes serotype M49 (strain NZ131) OX=471876 GN=Spy49_0459 PE=3	APIITSISESNLLRK	S	274	P	no	0	0	0	0	0	0	4.65349	6578.07	7701.61	0	0	0	0	0.1	0	0	0	0	0	0.1	79	106.6	0	0	0	0
3149	1	B5XLE2	50S ribosomal protein L10 OS=Streptococcus pyogenes serotype M49 (strain NZ131) OX=471876 GN=rplJ PE=3	ASIVVVDSRGLTVDQ	S	31	M P	no	73.4114	0	15.3434	232.243	370.77	37.9209	90.5362	394.912	579.088	26.3002	91.0547	5976.36	9874.56	1.1	0	0.2	3.5	6.5	0.6	1.4	6.6	10.2	0.4	1.4	98.3	169.9
2483	1	B5XJ35	30S ribosomal protein S10 OS=Streptococcus pyogenes serotype M49 (strain NZ131) OX=471876 GN=rpsJ PE=3	ATHKYKDSREQFEMR	S	61	M P	no	439.046	171.464	180.753	1313.03	990.501	333.511	621.383	2717.68	4371.84	364.704	452.711	10053.7	14944.1	4.9	1.8	1.9	15.9	13	4.1	7	31.7	62	4.4	5.8	137.4	215.4
2044	2	A0A0H3BYW3	Uncharacterized protein OS=Streptococcus pyogenes serotype M49 (strain NZ131) OX=471876 GN=Spy49_0908 PE=4	ATSQTIQSKMEKLTS	S	116	P	no	1770.85	399.068	414.513	9598.44	3566.93	2119.28	1765.97	3853.2	2552.96	5632.05	8152.75	14034.9	11783.9	248.1	46	47.3	842.9	357.3	291.1	336.1	555.8	526.5	835.6	1146.3	2121.8	2099.3
1446	2	B5XJ51	50S ribosomal protein L6 OS=Streptococcus pyogenes serotype M49 (strain NZ131) OX=471876 GN=rplF PE=3	AYIRSLRSPEPYKGK	S	153	P L	no	3093.28	3230.27	1259.01	6097.53	4635.28	8524.46	7963.64	9056.76	8782.14	2516.27	3625.18	19234.5	32254.3	38.3	34.4	13	72.9	65.4	109.5	103.1	121	143.1	31.4	47.3	282.4	531.7
7934	2	B5XKI1	Elongation factor Tu OS=Streptococcus pyogenes serotype M49 (strain NZ131) OX=471876 GN=tuf PE=3	DAPGHADYVKNMITG	Y	91	P	no	152.215	0	0	868.766	724.053	66.3365	300.21	1301.79	1661.64	219.227	303.264	2536.11	9918.95	0.4	0	0	2.4	2	0.2	0.8	3.1	4.1	0.6	0.8	6.6	26.1
3319	2	B5XJ63	50S ribosomal protein L17 OS=Streptococcus pyogenes serotype M49 (strain NZ131) OX=471876 GN=rplQ PE=3	DEAADKYTSTTALQK	T	83	P	no	283.705	17.6782	17.111	1017.52	775.924	151.02	307.685	1058.16	1757.49	261.301	292.919	12443.1	24055	3	0.2	0.2	13.3	11.9	2.1	4.3	13.7	28.5	3	3.5	183.9	377.4
4542	2	A0A0H3BYS1	Putative PBP 5 synthesis repressor OS=Streptococcus pyogenes serotype M49 (strain NZ131) OX=471876 GN=psr PE=3	DEDDAFLTESVARCA	T	131	P L	no	2005.79	609.416	825.837	987.131	1221.39	1385.1	5204.03	9466.24	8202.72	1789.49	1347	1434.91	1778.23	4873.2	1061.9	1466.3	1730.4	2745.9	2716.8	9592.1	18553.5	35637.1	4753.2	3183.5	4019	5064
4171	1	A0A0H3BZI9	UDP-glucose 6-dehydrogenase OS=Streptococcus pyogenes serotype M49 (strain NZ131) OX=471876 GN=Spy49_0459 PE=3	DFNEFIKYSDIIVAN	Y	356	M P L	no	57.7126	3.64765	3.95542	120.47	188.534	53.1145	376.933	8126.83	6328.9	52.5489	69.6707	140.618	137.109	14.8	0.8	0.8	21.7	28.8	9.8	8.1	97.6	87.6	12.1	13.9	22.3	22.4
456	2	A0A0H3BZ95	UPF0371 protein Spy49_1067 OS=Streptococcus pyogenes serotype M49 (strain NZ131) OX=471876 GN=Spy49_1067 PE=3	DINHIISSEGMGKND	S	143	M	no	9369.14	6140.08	3352.97	33050.2	40751.8	7816.19	10385.6	20585.6	19122.2	19766.7	25161.7	72578.1	76477.9	696.8	470.5	253.5	2371.3	2806.6	690	1009	1755.8	1705.5	1651.5	2107.7	6323.2	6518.3
1619	1	A0A0H3BZ43	Uncharacterized protein OS=Streptococcus pyogenes serotype M49 (strain NZ131) OX=471876 GN=Spy49_1003c PE=3	DKLVNTESVRDGVNV	S	62	M	no	2108.26	1204.08	1430.48	3924.37	3483.91	2472.98	1661.66	3971.32	7611.17	2920.92	3908.34	5037.09	6492.02	54.4	33.2	40.7	87.5	76.8	66.3	69.6	127.9	244.5	79.2	103.8	140.5	184.6
3153	2	A0A0H3C281	50S ribosomal protein L13 OS=Streptococcus pyogenes serotype M49 (strain NZ131) OX=471876 GN=rplM PE=3	DKVYYTHSMYPGGLK	S	80	M L	no	118.747	9.93313	9.65149	158.538	301.452	51.8543	331.346	447.955	1225.95	137.307	379.239	13061.1	20146.2	1.1	0.1	0.1	1.8	3.8	0.6	3.7	4.8	14	1.4	4.1	146.7	220.2
2149	1	A0A0H3BXC6	Signal recognition particle receptor FtsY OS=Streptococcus pyogenes serotype M49 (strain NZ131) OX=471876 GN=ftsY PE=3	DLKVSELSQSTASEP	S	105	M P	no	1481.26	828.931	1226.56	5095.77	4190.09	1585.73	1476.78	5693.06	7990.57	2757.95	3067.92	5437.68	9603.03	115	70.5	118.1	503.5	426.5	128.4	129.6	458.6	699.5	206.2	229.1	435.2	789.8
3813	2	B5XKI1	Elongation factor Tu OS=Streptococcus pyogenes serotype M49 (strain NZ131) OX=471876 GN=tuf PE=3	DLPVIQGSALKALEG	S	177	M P	no	0	0	0	14841.4	34863.2	0	0	6005.02	10658.8	0	0	768.519	2280.22	0	0	0	41	96.3	0	0	14.3	26.3	0	0	2	6
1407	1	A0A0H3C2S7	Uncharacterized protein OS=Streptococcus pyogenes serotype M49 (strain NZ131) OX=471876 GN=Spy49_1801c PE=4	DSDIKSVTEIVEEKL	T	89	M	no	2670.81	960.063	2201.86	2110.61	2862.77	3171.9	5535.72	10896.5	10726.8	982.14	905.393	1520.39	2004.39	575	188.5	437.6	432.1	625.2	644.9	854.8	1546.9	2052.5	246.4	235	405.3	573.9
6517	2	A0A0H3C2S7	Uncharacterized protein OS=Streptococcus pyogenes serotype M49 (strain NZ131) OX=471876 GN=Spy49_1801c PE=4	DSKSPLKTISPVSQF	T	143	P	no	823.074	29.5404	162.523	397.113	239.48	577.424	2254.96	7888.66	7917.18	224.409	122.517	732.249	761.381	177.2	5.8	32.3	81.3	52.3	117.4	348.2	1119.9	1514.9	56.3	31.8	195.2	218
5517	1	B5XIF1	Phosphoglycerate kinase OS=Streptococcus pyogenes serotype M49 (strain NZ131) OX=471876 GN=pgk PE=3	DVVFPGVTRGAKLEE	T	95	M P	no	22.9168	20.9167	0	428.504	1648.64	71.1628	294.26	5089.36	8744.06	20.4811	51.6874	257.744	535.856	0.2	0.2	0	4.7	18.8	0.7	2.9	42.7	84.3	0.2	0.5	2.6	5.5
2608	1	B5XIY5	30S ribosomal protein S2 OS=Streptococcus pyogenes serotype M49 (strain NZ131) OX=471876 GN=rpsB PE=3	EAVADEATRAGQYFI	T	85	M P L	no	2420.55	2702.3	1686.88	3154.86	4342.96	1174.27	1157.79	1711.03	2355.5	1305.11	1629.64	5184.39	6206.76	19.1	23.8	14.7	28.1	40.7	11.4	10.9	16.8	24.3	12.1	15.8	50.3	59.4
2808	1	B5XLR6	30S ribosomal protein S20 OS=Streptococcus pyogenes serotype M49 (strain NZ131) OX=471876 GN=rpsT PE=3	EELFRAASSSIDKAE	S	48	M	no	236.8	82.9	194.8	964.9	70.8	134.7	159.1	2181.1	2683.9	338.6	926.2	8516.8	4478.8	236.8	82.9	194.8	964.9	70.8	134.7	159.1	2181.1	2683.9	338.6	926.2	8516.8	4478.8
6480	1	A0A0H3C1E7	Valine--tRNA ligase OS=Streptococcus pyogenes serotype M49 (strain NZ131) OX=471876 GN=valS PE=3	EGRKMSKSLGNGIDP	S	523	M P	no	52.0302	20.2453	6.20524	491.331	1508.01	38.5892	504.644	4902.66	3613.71	87.3141	101.693	391.874	682.183	5.5	2.1	0.6	48.4	169.9	3	40.4	364.6	313.6	10.6	12.8	52.6	89.4
5297	2	A0A0H3BXI0	Uncharacterized protein OS=Streptococcus pyogenes serotype M49 (strain NZ131) OX=471876 GN=Spy49_1001c PE=3	EHEAASVTVQDRVTS	T	124	M P L	no	136.622	6.48206	9.0022	135.973	77.887	160.056	223.76	1031.39	1766.06	1472.56	1461.21	1865.72	2297.23	4.1	0.2	0.3	3.4	1.9	5.4	13.2	35	56.3	43.1	45.3	57.6	73.7
4486	1	A0A0H3C0V3	Glutamine--fructose-6-phosphate aminotransferase [isomerizing] OS=Streptococcus pyogenes serotype M49 (strain NZ131) OX=471876 GN=glmS PE=3	ELIRDSYTAELDLSD	T	236	P	no	1829.92	1369.66	1732.55	2065.35	2524.97	1846.2	1886.45	1977.09	1672.33	841.524	680.49	307.847	333.242	80.2	47.7	68.7	82.8	103.8	80.2	93.4	84.2	79.4	35	28.5	13.1	13.3
7156	2	A0A0H3BYR4	Putative cytoplasmic membrane protein OS=Streptococcus pyogenes serotype M49 (strain NZ131) OX=471876 GN=lemA PE=3	ELSKQVTSLFAVAEN	S	100	P L	no	101.592	154.956	19.9118	2869.82	5695.96	203.312	39.7501	1357.06	1318.63	199.237	279.202	704.173	816.224	4.4	6.4	1	179.8	238.5	8.3	4.1	54.2	60	8.8	12	34.3	34.5
18272	1	B5XKI1	Elongation factor Tu OS=Streptococcus pyogenes serotype M49 (strain NZ131) OX=471876 GN=tuf PE=3	ERGITINTAHVEYET	T	68	P	no	0	0	0	144.794	253.419	0	0	125.979	324.222	0	0	307.408	532.051	0	0	0	0.4	0.7	0	0	0.3	0.8	0	0	0.8	1.4
138	2	A0A0H3BZ43	Uncharacterized protein OS=Streptococcus pyogenes serotype M49 (strain NZ131) OX=471876 GN=Spy49_1003c PE=3	ETYIKNTSKDLTSAI	S	10	M P L	no	9952.21	7833.8	3567.42	46464.5	47835.8	11268.3	8664.04	24579.4	34423	13682.6	18110.9	49058.7	72168.3	256.8	216	101.5	1036	1054.5	302.1	362.9	791.6	1105.8	371	481	1368.4	2052.1
1611	1	A0A0H3BZR7	Mid-cell-anchored protein Z OS=Streptococcus pyogenes serotype M49 (strain NZ131) OX=471876 GN=mapZ PE=3	EVTKESQTLGLNEAK	T	16	M P	no	4989.85	1655.69	3259.63	2997.02	2311.17	4013.83	7392.37	13708	11700	1667.38	1741.41	2524.83	2196.09	370.2	148.9	304.2	267.1	236.3	311.9	566	1312.1	1474.6	123.5	132.1	221.7	234.6
6837	2	A0A0H3BW88	Archaeal S-adenosylmethionine synthetase OS=Streptococcus pyogenes serotype M49 (strain NZ131) OX=471876 GN=Spy49_0455 PE=3	FYDPSHLSYEVVERK	S	16	M P	no	0	0	0	0.216057	4.92804	0	41.1958	7152.46	6820.18	0	0	2.92408	2.8321	0	0	0	0.1	2.3	0	0.4	25.3	35.5	0	0	1.7	1.7
3388	2	A0A0H3BXZ7	50S ribosomal subunit assembly factor BipA OS=Streptococcus pyogenes serotype M49 (strain NZ131) OX=471876 GN=bipA PE=3	GAIIQSLSERKGDML	S	425	P L	no	835.021	564.049	171.872	19906.8	11752.3	1050.64	979.837	17765.2	18497	1672.82	2325.05	2440.23	1941.32	76.4	39.9	12.6	1802.7	938.4	90.4	59.7	1142.3	1189.4	148.8	208.8	221	175.5
7943	2	B5XLV6	ATP-dependent 6-phosphofructokinase OS=Streptococcus pyogenes serotype M49 (strain NZ131) OX=471876 GN=pfkA PE=3	GDIFPLGSKEVGDKI	S	54	P	no	120.914	308.941	68.4807	1308	2767.09	212.698	409.895	4304.02	4222.17	267.113	291.104	648.871	1181.6	1.6	4.9	1	23.7	50.6	3.4	6	60.7	53.2	3.8	4.2	9.3	17.2
19703	2	B5XJ61	30S ribosomal protein S11 OS=Streptococcus pyogenes serotype M49 (strain NZ131) OX=471876 GN=rpsK PE=3	GFKGSRKSTPFAAQM	S	56	P	no	59.1073	0	0	178.164	338.498	45.1087	146.88	253.362	735.747	0	6.79621	920.539	2569.54	0.8	0	0.1	2.3	5.3	0.7	2.2	3.6	12.9	0	0.1	15.1	40.3
232	3	B5XM21	Uridine kinase OS=Streptococcus pyogenes serotype M49 (strain NZ131) OX=471876 GN=udk PE=3	GGSGGGKTSVSRAIL	T	19	M L	no	20832.9	5800.02	3046.81	10237	2431.56	6442.75	18162.3	37582.4	24765.7	27607.2	26275.7	15944.6	13080.4	3744.9	982.6	483.1	1872.2	447	1217.4	2955.2	7470.7	5406.2	5105.9	5199.3	3358.5	2846.9
3251	1	A0A0H3BYI5	Glucose-1-phosphate thymidylyltransferase OS=Streptococcus pyogenes serotype M49 (strain NZ131) OX=471876 GN=rmlA PE=3	GIILAGGSGTRLYPL	S	10	P L	no	387.939	252.499	125.648	2202.26	4048.26	438.536	552.17	4545.5	5334.36	384.379	486.399	2220.61	3511.29	22	15.6	7.9	134.8	241.4	24	43.6	309.5	434.9	23.2	26.5	131.7	213.1
3003	2	B5XLN9	GMP synthase [glutamine-hydrolyzing] OS=Streptococcus pyogenes serotype M49 (strain NZ131) OX=471876 GN=guaA PE=3	GNREYGQSTLHLRET	S	117	M P L	no	392.422	199.793	100.309	2954.61	4395.31	272.872	796.191	4668	5970.1	625.429	708.312	2276.38	3043.29	32.5	16.2	8.2	249.6	374.6	25.5	49.7	286.2	392	65.2	73.7	236.2	309.2
4982	2	B5XLE2	50S ribosomal protein L10 OS=Streptococcus pyogenes serotype M49 (strain NZ131) OX=471876 GN=rplJ PE=3	GPSAVAFSNEDVIAP	S	86	M P	no	0	0	0	86.2617	513.374	0	0	23.9341	351.994	0	0	3526.24	12867.7	0	0	0	1.3	9	0	0	0.4	6.2	0	0	58	221.4
3409	1	B5XHV3	Translation initiation factor IF-2 OS=Streptococcus pyogenes serotype M49 (strain NZ131) OX=471876 GN=infB PE=3	GQKKNKKSWNSQNQV	S	322	M P	no	657.187	812.169	525.913	4257.09	5695.89	1043.59	869.06	4159.04	4783.9	1232.83	2807.17	8098.04	10902.2	37.6	50.8	37	293.3	428.3	69.4	62.8	259.1	335.3	74.1	167.1	511.1	644.4
2238	1	B5XLJ8	L-lactate dehydrogenase OS=Streptococcus pyogenes serotype M49 (strain NZ131) OX=471876 GN=ldh PE=3	GSGTSLDSARFRQAL	S	153	M P L	no	494.063	503.062	385.096	1986.19	4216.64	669.624	902.8	5069.15	19921.7	564.646	674.856	1433.8	7553.92	6.3	6.4	4.9	28.9	68.8	9.6	11.1	52.3	237.7	7.5	9.6	21.4	114.7
3783	2	A0A0H3BYW3	Uncharacterized protein OS=Streptococcus pyogenes serotype M49 (strain NZ131) OX=471876 GN=Spy49_0908 PE=4	IGEATSQTIQSKMEK	T	113	P	no	761.585	26.8937	139.339	1106.86	236.597	1414.55	7002.94	8081.45	3177.01	604.59	1351.32	2094.84	2186.93	106.7	3.1	15.9	97.2	23.7	194.3	1332.8	1165.7	655.2	89.7	190	316.7	389.6
8284	1	B5XIG1	Trigger factor OS=Streptococcus pyogenes serotype M49 (strain NZ131) OX=471876 GN=tig PE=3	IHEEVNRSVNEFMGN	S	317	M P	no	44.6823	28.1779	64.5923	956.438	694.51	17.5012	49.179	1376.53	2533.75	45.4588	51.7588	468.728	2318.22	0.8	0.6	1.3	19.3	16.5	0.4	1	24.6	54.6	1	1.2	10.8	59.1
5252	2	A0A0H3BW88	Archaeal S-adenosylmethionine synthetase OS=Streptococcus pyogenes serotype M49 (strain NZ131) OX=471876 GN=Spy49_0455 PE=3	IIIRGGHSVQDFGGS	S	69	M P	no	13.8047	25.9144	15.2727	37.594	67.0641	4.72043	669.432	4975.62	10335.9	20.054	15.5019	84.6263	749.341	6.4	12	7	17.4	31.3	2.4	6.5	17.6	53.8	10.6	8.5	49.2	449.8
9553	1	A0A0H3BXV2	Glyco_trans_2-like domain-containing protein OS=Streptococcus pyogenes serotype M49 (strain NZ131) OX=471876 GN=Spy49_0457 PE=4	IKSSDILSSNDIENL	S	261	P	no	2.46367	0.920333	3.75738	3.85259	72.0388	0	41.2369	3743.83	2592.34	0	11.9711	3.39888	48.7163	8.4	5.6	24.7	18.3	329	0	1.7	71.5	79.8	0	68.8	21.1	293.1
2120	2	A0A0H3BZL9	PTS system, fructose-specific IIABC component OS=Streptococcus pyogenes serotype M49 (strain NZ131) OX=471876 GN=fruA PE=4	ILNNEGNTYHAKNGK	T	266	P L	no	299.797	389.726	76.9291	4701.27	4024	412.367	1974.88	3028.05	2972.85	1195.08	1552.88	9260.61	12840.4	5	8.8	1.6	108	95.8	6.2	27.8	48.3	47.3	22.1	29.1	183.3	259.7
2502	1	A0A0H3BVS5	Oligopeptide transport ATP-binding protein oppF OS=Streptococcus pyogenes serotype M49 (strain NZ131) OX=471876 GN=oppF PE=3	INGRKSKSEANELIR	S	80	M L	no	557.793	387.942	137.035	2483.7	3039.25	837.671	1508.39	4918.77	4594.85	953.003	1336.61	3652.07	7568.42	64.4	59.7	19.5	300.2	328.5	92.5	129.9	437.1	440.5	125.8	167.6	464	953.3
2622	3	B5XLJ8	L-lactate dehydrogenase OS=Streptococcus pyogenes serotype M49 (strain NZ131) OX=471876 GN=ldh PE=3	ISVRDAAYSIINKKG	Y	224	M L	no	376.429	259.391	188.618	1649.43	4970.49	404.565	585.6	2054.8	4207.28	489.36	759.213	5105.41	22530.1	4.8	3.3	2.4	24	81.1	5.8	7.2	21.2	50.2	6.5	10.8	76.2	342.1
2318	2	A0A0H3BZ29	Iron-sulfur cluster assembly ATPase protein SufC OS=Streptococcus pyogenes serotype M49 (strain NZ131) OX=471876 GN=Spy49_0242 PE=3	KADEDKISVRDFITK	S	116	M	no	682.012	711.139	300.643	2698.47	3041.47	1280.41	975.877	2571.33	3736.56	772.481	1146.49	2423.46	3048.25	56.7	66.1	27.8	243.8	279.2	115.6	84.9	245.7	334.6	65.5	94.3	218.3	254.5
9704	2	B5XIG1	Trigger factor OS=Streptococcus pyogenes serotype M49 (strain NZ131) OX=471876 GN=tig PE=3	KAEGFEATDSEIEQE	T	376	P	no	0	0	0	6923.03	11608.8	0	34.4253	11.1913	167.061	0	0	0	0	0	0	0	139.7	275.8	0	0.7	0.2	3.6	0	0	0	0
727	7	A0A0H3C0C0	30S ribosomal protein S14 OS=Streptococcus pyogenes serotype M49 (strain NZ131) OX=471876 GN=rpsN2 PE=3	KAKGDYESLRKLPRD	S	35	M L	no	3555.57	2425.28	1692.82	13418.2	24277	4958.85	7454.35	60171.9	103569	2693.25	3625.41	6834.54	9637.2	6172.6	5308.7	3413.1	34557.9	70757	7274.6	2719.3	22290.6	45808.7	5127.9	6501.3	23491.3	43644.8
4820	1	A0A0H3C2K4	Alkyl hydroperoxide reductase C OS=Streptococcus pyogenes serotype M49 (strain NZ131) OX=471876 GN=ahpC PE=3	KEGAETLTPSLDLVG	T	177	P L	no	433.695	350.934	93.6631	1265.74	5372.71	437.698	513.753	997.41	1820.13	306.492	568.811	1841.62	3414.87	6.2	5.3	1.7	14.4	54.2	5.9	9.9	15.2	32.1	4.3	7.1	20.8	39.6
2418	1	B5XHZ0	Chaperone protein DnaK OS=Streptococcus pyogenes serotype M49 (strain NZ131) OX=471876 GN=dnaK PE=3	KENGIDLSQDKMALQ	S	223	P L	no	1278.6	850.564	1139.17	4233.57	5432.71	950.895	729.084	4092.29	9126.44	1451.15	1259.67	2294.1	3465.85	6.7	5.5	6.9	24.5	35.6	5.7	4.9	20.3	54.8	8.5	7.1	14	21.6
2062	2	A0A0H3BYM8	Putative ABC transporter OS=Streptococcus pyogenes serotype M49 (strain NZ131) OX=471876 GN=Spy49_0800 PE=4	KITEHLASFEDLVKR	S	129	M L	no	774.371	678.664	319.059	3174.27	4726.07	388.788	982.46	958.598	834.301	1569.63	2245.85	11804.2	14220	166.1	178.9	83.9	1165.3	1828.2	105.2	289.3	357.6	287.1	365.5	466.6	2975.3	3800.9
3228	2	B5XIK9	30S ribosomal protein S15 OS=Streptococcus pyogenes serotype M49 (strain NZ131) OX=471876 GN=rpsO PE=3	KNEIIAQYARHEGDT	Y	15	M	no	82.5028	161.422	67.8157	643.261	575.934	441.334	629.014	754.047	932.882	66.0279	115.72	5904.33	10083.8	1.7	3.6	1.5	15.3	15.6	11	16.4	18.7	27.5	1.5	2.7	152.1	259.2
2607	1	B5XKI1	Elongation factor Tu OS=Streptococcus pyogenes serotype M49 (strain NZ131) OX=471876 GN=tuf PE=3	KPHVNIGTIGHVDHG	T	17	P	no	114.161	31.3046	0	904.965	1122.28	0	37.5263	4535.26	3606.97	401.917	379.081	8568.99	27932.7	0.3	0.1	0	2.5	3.1	0	0.1	10.8	8.9	1.1	1	22.3	73.5
6370	2	A0A0H3BYB7	LSU ribosomal protein L23p (L23Ae) OS=Streptococcus pyogenes serotype M49 (strain NZ131) OX=471876 GN=rplW PE=3	KPVITEKSMIALEAG	S	16	M	no	167.883	39.5035	89.726	242.323	220.177	51.2461	136.552	124.848	130.26	130.674	207.166	2173.98	4238.87	5	1.2	2.7	8	7.9	1.8	4.3	4.2	4.1	3.8	6	75.1	143.3
2240	1	B5XJ60	30S ribosomal protein S13 OS=Streptococcus pyogenes serotype M49 (strain NZ131) OX=471876 GN=rpsM PE=3	KRLMEIGSYRGIRHR	S	85	M L	no	144.093	74.554	80.2934	1386.02	2703.67	185.856	309.426	1276.63	2860.57	119.949	554.218	7752.49	13500.2	4.6	1.9	2	38.8	88.6	5.3	8.1	35.3	92.4	3.8	17.5	267.7	434.5
1736	2	B5XIW7	Chaperonin GroEL OS=Streptococcus pyogenes serotype M49 (strain NZ131) OX=471876 GN=groEL PE=3	KSQLETTTSDFDREK	T	355	M P L	no	1804.88	756.957	203.847	9439.87	10325.3	1922.82	1760.83	11861.1	11266.9	3109.29	3760.21	12776.3	23072.2	7.3	3.7	1.1	51.5	56.1	8.8	10.8	56.6	64.8	14	16	57.5	104.5
2881	1	A0A0H3BXV2	Glyco_trans_2-like domain-containing protein OS=Streptococcus pyogenes serotype M49 (strain NZ131) OX=471876 GN=Spy49_0457 PE=4	KSSDILSSNDIENLK	S	262	M P L	no	7.68432	9.26907	0.471574	78.7571	332.189	5.00558	305.638	15891.6	11217.2	11.6238	5.55055	114.772	266.369	26.2	56.4	3.1	374.1	1517.1	31.1	12.6	303.5	345.3	65.3	31.9	712.5	1602.6
8370	1	A0A0H3BXU8	AP_endonuc_2 domain-containing protein OS=Streptococcus pyogenes serotype M49 (strain NZ131) OX=471876 GN=Spy49_0451 PE=4	LKERLQKYNITPISI	Y	59	M	no	0	0	0	30.536	46.2365	0	47.8076	4281.27	2757.84	0	0	7.31069	0	0	0	0	15.5	26.4	0	1.2	73.5	51.5	0	0	2.5	0
3915	2	A0A0H3BW88	Archaeal S-adenosylmethionine synthetase OS=Streptococcus pyogenes serotype M49 (strain NZ131) OX=471876 GN=Spy49_0455 PE=3	LNNGKQNTNLILSTQ	T	381	P	no	2.80408	0	20.0727	78.6449	61.2791	47.401	3759.12	12693.5	12026.6	0	66.3846	11.0083	0	1.3	0	9.2	36.4	28.6	24.1	36.5	44.9	62.6	0	36.4	6.4	0
4422	2	B5XJR0	30S ribosomal protein S7 OS=Streptococcus pyogenes serotype M49 (strain NZ131) OX=471876 GN=rpsG PE=3	LPDPLYNSKIVTRLI	S	20	M P	no	873.12	681.921	636.534	3381.22	4676.96	1397.75	3714.7	1933.26	2855.81	695.88	834.423	7362.27	10569.5	6.5	6	5.6	33.2	49.9	13.5	38.2	19.6	32.5	6	7.8	78.4	118.9
4434	2	A0A0H3BXW6	Branched-chain-amino-acid aminotransferase OS=Streptococcus pyogenes serotype M49 (strain NZ131) OX=471876 GN=bcaT PE=3	LPGKAAKSAGFSDVI	S	201	P	no	312.343	178.765	57.3343	1519.73	2012.28	172.463	783.205	5688.36	6661.63	644.438	1160.98	5930.11	6055.13	9.6	6.7	2.4	71.1	100.9	5.6	26.2	137.3	186.2	21.7	38.5	201.1	211
4034	1	A0A0H3BY55	Non-specific serine/threonine protein kinase OS=Streptococcus pyogenes serotype M49 (strain NZ131) OX=471876 GN=Spy49_1257c PE=4	LSDRYGSTFEMSRDL	T	262	M L	no	667.028	341.444	550.601	780.68	1319.15	979.492	1154.28	4397.06	7116.07	612.016	596.936	2793.92	3415.42	61	27.9	52.2	67.9	110.7	88.8	109.9	357.4	923.8	59	55.9	281.8	353.3
8617	2	A0A0H3BW88	Archaeal S-adenosylmethionine synthetase OS=Streptococcus pyogenes serotype M49 (strain NZ131) OX=471876 GN=Spy49_0455 PE=3	--MDLKITNGFYDPS	T	6	P	no	0	0	1.30909	4.10509	15.2126	0	473.752	5965.09	5340.87	0	0	0	0	0	0	0.6	1.9	7.1	0	4.6	21.1	27.8	0	0	0	0
6094	2	B5XHZ0	Chaperone protein DnaK OS=Streptococcus pyogenes serotype M49 (strain NZ131) OX=471876 GN=dnaK PE=3	MGTSEKVSANGKEYT	S	78	M	no	1049.6	896.958	1271.25	4078.05	1480.26	300.283	297.585	1915.11	2448.15	375.591	461.288	1786.12	1508.28	5.5	5.8	7.7	23.6	9.7	1.8	2	9.5	14.7	2.2	2.6	10.9	9.4
4105	2	B5XLE8	GTP cyclohydrolase 1 OS=Streptococcus pyogenes serotype M49 (strain NZ131) OX=471876 GN=folE PE=3	MKKERLMSINKEKAE	S	8	M	no	378.159	300.483	311.572	1484.27	1670.96	432.83	389.57	1037.94	1396.79	540.943	1243.01	2587.43	3957.85	15.1	14.8	16.4	72.8	83.6	19.2	17.4	68.4	91.9	23.6	47.3	97.7	139.6
5410	1	B5XKA6	Threonine--tRNA ligase OS=Streptococcus pyogenes serotype M49 (strain NZ131) OX=471876 GN=thrS PE=3	MMHRYEKSGALSGLQ	S	367	M P L	no	466.14	311.463	228.971	1166.02	1934.23	428.245	757.658	3178.07	3415.53	386.528	406.488	1099.07	1855.64	23.1	16.4	11.2	65.7	121.4	23.1	42.9	146.4	178.3	21.3	22.7	61.6	107.3
7523	2	A0A0H3BZ61	F420_ligase domain-containing protein OS=Streptococcus pyogenes serotype M49 (strain NZ131) OX=471876 GN=Spy49_0453 PE=4	----MNLSIFGLKNI	S	4	M	no	0	0	0	0	0	0	13.8601	7543.46	9059.78	0	0	0	0	0	0	0	15.6	5.4	0	0.6	148.3	242.4	0	0	32.8	25
2913	1	A0A0H3BVL7	ParB domain-containing protein OS=Streptococcus pyogenes serotype M49 (strain NZ131) OX=471876 GN=Spy49_0168 PE=4	------MSNFISPVY	S	2	M	no	2873.81	2925.32	2190.21	1777.78	2075.51	2031.33	2421.75	1498.89	978.858	1815.29	2076.54	1539.66	1220.79	492.1	665.2	471.5	356.1	419.1	448	461.8	338.7	217.9	380.9	411.3	328.1	257.3
797	2	B5XKI2	Triosephosphate isomerase OS=Streptococcus pyogenes serotype M49 (strain NZ131) OX=471876 GN=tpiA PE=3	------MSRKPIIAG	S	2	M L	no	2916.37	827.199	82.7775	11300	10545.5	545.526	2975.84	27494.1	26420.8	5648.78	6119.52	26834.2	50580.7	26.1	7.1	0.8	134.3	133.1	4.6	24	172.3	196.1	51.5	53.5	234.1	492.1
8134	1	A0A0H3BY83	Transketolase OS=Streptococcus pyogenes serotype M49 (strain NZ131) OX=471876 GN=tkt PE=3	------MTFDAIDQL	T	2	P	no	152.727	105.125	53.3716	1102.9	1503.6	117.734	270.556	1584.22	1706.57	142.65	202.194	572.636	727.818	5.1	4.5	2.1	33.3	49.6	4.7	7.7	34	48.2	5.2	8	23.5	31.3
1895	1	B5XKM2	50S ribosomal protein L19 OS=Streptococcus pyogenes serotype M49 (strain NZ131) OX=471876 GN=rplS PE=3	MYTVRKISGGIGVER	S	65	M L	no	548.368	521.706	193.925	1269.56	1557.18	760.931	950.623	1866.7	3316.43	565.235	621.237	6336.4	15410.4	10	9.2	3.4	24	31.2	16.1	19.9	36.2	77.3	10.9	12.2	129.9	300.9
6662	2	B5XJ51	50S ribosomal protein L6 OS=Streptococcus pyogenes serotype M49 (strain NZ131) OX=471876 GN=rplF PE=3	NNMVVGVSEGFKKDL	S	80	P	no	64.6116	37.5613	0	267.656	425.255	23.3547	146.76	344.307	1110.81	40.068	53.6496	3514.52	6976.19	0.8	0.4	0	3.2	6	0.3	1.9	4.6	18.1	0.5	0.7	51.6	115
3851	2	A0A0H3BW88	Archaeal S-adenosylmethionine synthetase OS=Streptococcus pyogenes serotype M49 (strain NZ131) OX=471876 GN=Spy49_0455 PE=3	NTNLILSTQHFIPKT	T	387	P	no	103.967	0	0	44.0757	33.4249	16.7182	1071.09	9385.83	15734.4	36.3242	40.8521	201.762	73.3015	48.2	12	6.4	20.4	15.6	8.5	10.4	33.2	81.9	19.2	22.4	117.3	44
1126	2	A0A0H3BZ43	Uncharacterized protein OS=Streptococcus pyogenes serotype M49 (strain NZ131) OX=471876 GN=Spy49_1003c PE=3	NTSKDLTSAIRGQLT	S	15	M L	no	1290.53	1185.95	625.616	9997.05	20576.9	1615.08	943.041	3934.06	6898.3	1320.32	1581.41	6937.2	13571.3	33.3	32.7	17.8	222.9	453.6	43.3	39.5	126.7	221.6	35.8	42	193.5	385.9
6712	1	A0A0H3BXC6	Signal recognition particle receptor FtsY OS=Streptococcus pyogenes serotype M49 (strain NZ131) OX=471876 GN=ftsY PE=3	PEKADPASVVFDGME	S	381	P	no	291.099	248.091	81.009	2939.05	4693.09	424.838	297.407	1762.79	1836.86	731.619	1186.46	4539.32	5655.07	22.6	21.1	7.8	290.4	477.7	34.4	26.1	142	160.8	54.7	88.6	363.3	465.1
3489	2	B5XKL7	50S ribosomal protein L31 type B OS=Streptococcus pyogenes serotype M49 (strain NZ131) OX=471876 GN=rpmE2 PE=3 M	PLIRVEISSDSHPFY	S	50	P L	no	312.059	145.227	36.841	3692.95	3660.74	254.227	481.341	5212.44	7706.07	363.81	501.487	10684.8	4861.66	3.2	1.5	0.4	43.8	54.3	3	6.4	61.7	102	4	6	197.2	159.1
2768	2	A0A0H3BXC6	Signal recognition particle receptor FtsY OS=Streptococcus pyogenes serotype M49 (strain NZ131) OX=471876 GN=ftsY PE=3	QADASNDSAKEEAVD	S	137	P	no	776.693	273.959	291.84	6749.49	2618.19	1155.96	758.901	3654.68	3005.46	2376.76	3556.69	4876.67	9386.61	60.3	23.3	28.1	666.9	266.5	93.6	66.6	294.4	263.1	177.7	265.6	390.3	772
3047	2	A0A0H3C022	Dipeptide transport ATP-binding protein dppD OS=Streptococcus pyogenes serotype M49 (strain NZ131) OX=471876 GN=dppD PE=4	QDFLKGVTHDLRG--	T	262	M L	no	1930.46	1271.36	915.962	1022.73	372.364	1896.71	4341.7	8321.54	7576.52	1476.4	1544.28	1416.96	1094.61	4309.2	2839.1	1933	1979.5	839.6	4733.2	3547.8	2725.3	3178.4	3390.5	4001.3	3612.1	2979
1483	2	A0A0H3BZA2	Uncharacterized protein OS=Streptococcus pyogenes serotype M49 (strain NZ131) OX=471876 GN=Spy49_0497 PE=4	QFAKEKGSEYSHLAR	S	57	M L	no	1415.69	452.087	220.032	3237.49	1727.32	879.317	1211.58	4083.61	4314.24	2444.02	3452.93	9922.59	13063.8	118.9	40.2	21	271.3	154.3	75.7	117.1	319.1	395.6	215.3	298.8	898.1	1279.1
5260	1	A0A0H3C1A0	Arginine repressor OS=Streptococcus pyogenes serotype M49 (strain NZ131) OX=471876 GN=argR PE=3	QGPRSIKSTILAVSD	S	81	M	no	124.415	122.168	58.8028	913.555	1760.4	381.391	276.508	623.848	955.484	338.837	538.368	1967.38	1941.72	30.7	25.7	13.2	188.2	370.3	75	41.7	76.2	146.2	79.5	118.5	492.6	580.7
760	2	A0A0H3BZ03	R3H domain protein OS=Streptococcus pyogenes serotype M49 (strain NZ131) OX=471876 GN=Spy49_0209 PE=4	QKLEAEDTKVVPLMS	T	103	M P	no	1356.41	190.806	11874.1	6930.73	1250.01	8706.06	69303.5	91426.8	93665.2	338.664	722.868	2193.96	819.929	48.3	8.2	524.9	335	68.4	353.9	3043.7	5533.8	5527.7	14.5	31.1	94.9	37.5
3257	1	B5XLI8	Peptide chain release factor 1 OS=Streptococcus pyogenes serotype M49 (strain NZ131) OX=471876 GN=prfA PE=3	QRVPVTESQGRVHTS	S	194	M L	no	571.236	493.911	345.022	4089.52	2638.05	764.86	603.267	2944.44	3144.69	816.079	1175.59	5110.35	6551.88	88.2	66.5	48.7	497.2	303.7	125.2	90.1	435.7	427.8	131.9	199.8	822	1048.2
4164	2	B5XMC3	Arginine deiminase OS=Streptococcus pyogenes serotype M49 (strain NZ131) OX=471876 GN=arcA PE=3	QTPIHVYSEIGKLKK	S	11	M L	no	250.193	119.785	93.8046	2672.91	2758.83	126.307	256.232	915.112	1470.67	251.242	270.501	4100.58	17394	2.8	1.6	1	10.7	11.3	1.5	5.9	25.6	38.9	2.8	3.3	51.4	216.1
3379	2	B5XJ48	50S ribosomal protein L5 OS=Streptococcus pyogenes serotype M49 (strain NZ131) OX=471876 GN=rplE PE=3	RDFHGVPTKSFDGRG	T	120	M P L	no	724.99	307.381	255.513	978.23	648.538	240.602	746.83	3559.54	3033.87	744.264	1397.91	7376.82	8358.69	5.4	2.3	2	8.8	6.6	2.2	6.8	28.5	28.9	6.2	12.1	69	79.9
1522	2	A0A0H3C1B5	Cell division protein SepF OS=Streptococcus pyogenes serotype M49 (strain NZ131) OX=471876 GN=sepF PE=3	REQYQQSTCSDQTTI	T	121	M P L	no	9090.26	2043.83	4916.22	6545.58	3328.94	10381.3	28974.5	19331.8	12902.9	6165.82	2520.41	2176.86	2766.1	1384.1	327	647.4	822.2	488.9	1504.6	3129.1	2026.3	1588.1	894.9	380.8	317.1	468.8
6677	2	B5XKU0	50S ribosomal protein L20 OS=Streptococcus pyogenes serotype M49 (strain NZ131) OX=471876 GN=rplT PE=3	RMNGLSYSQLMHGLK	S	77	M P L	no	0	0	0	230.214	510.468	0	33.4365	123.974	177.865	23.2536	92.7403	7555.43	12842.8	0	0	0.1	12.4	29.7	0.1	1.7	6.2	8.7	0.9	3.6	298.5	486.3
5032	2	A0A0H3BZK2	50S ribosomal protein L27 OS=Streptococcus pyogenes serotype M49 (strain NZ131) OX=471876 GN=rpmA PE=3	RQRGTHIYPGVNVGR	Y	57	P	no	138.86	29.3298	17.6103	267.2	219.455	92.7647	218.104	459.249	708.872	139.546	210.685	5134.69	3293.92	2.9	0.5	0.3	5.5	6.1	2	5	10.7	24.8	3.1	5.2	204.2	173.9
1881	1	B5XJ52	50S ribosomal protein L18 OS=Streptococcus pyogenes serotype M49 (strain NZ131) OX=471876 GN=rplR PE=3	RRVRGKLSGTADRPR	S	23	M L	no	449.898	208.268	55.0917	2280.39	572.966	219.565	421.96	1486.46	3109.98	457.75	615.83	7934.42	13128.7	15.3	9.1	2.2	109.4	27.7	9	16.6	78.4	132.8	14.5	19.3	269.9	467.9
7871	1	A0A0H3BZI2	Uncharacterized protein OS=Streptococcus pyogenes serotype M49 (strain NZ131) OX=471876 GN=Spy49_0454 PE=4	SDVLDDLSRQYFTIE	S	57	M P	no	1.8982	1.68849	0.195228	215.38	293.806	0	152.188	5632.9	4678.23	0	0	17.1596	122.737	3.6	2.8	0.3	371.5	517	0	12.7	282.2	309.3	0	0	28.3	184.6
4375	2	A0A0H3BZ61	F420_ligase domain-containing protein OS=Streptococcus pyogenes serotype M49 (strain NZ131) OX=471876 GN=Spy49_0453 PE=4	SGGIDRKSVDEVFLL	S	122	M P L	no	0	0	0	2.00152	88.5125	0	90.0904	11022.7	11033.2	0	0	0	0	0	0	0	13.1	238.3	0	3.9	216.7	295.2	0	0	0	0
3459	2	A0A0H3BZJ0	Formate acetyltransferase OS=Streptococcus pyogenes serotype M49 (strain NZ131) OX=471876 GN=pfl PE=3	SHANDGISLTTQVSP	S	676	P	no	73.9338	0	5.39678	6606.02	10397.2	31.8028	138.752	627.715	1158.69	76.3623	212.362	906.211	1011.67	2	0	0.1	71.7	121.3	0.9	3.6	19.7	39.5	2.9	9.1	41.8	48.4
4016	1	A0A0H3BW88	Archaeal S-adenosylmethionine synthetase OS=Streptococcus pyogenes serotype M49 (strain NZ131) OX=471876 GN=Spy49_0455 PE=3	SKKCFNSSIPLFKIQ	S	98	M	no	2.15698	0	0	5.40143	5.78509	1.18011	391.36	7576.52	8011.31	0.189189	0	0.860024	0	1	0	0	2.5	2.7	0.6	3.8	26.8	41.7	0.1	0	0.5	0
6879	1	A0A0H3BYN6	Ribose-phosphate pyrophosphokinase OS=Streptococcus pyogenes serotype M49 (strain NZ131) OX=471876 GN=prsA PE=3	SPDHGGVTRARKLAQ	T	178	M L	no	76.071	10.9619	1.80759	722.418	1199.55	0	566.131	4545.99	5415.35	152.739	141.048	442.05	1027.16	4.9	0.7	0.1	32.7	52.7	0	23.1	179.6	206.8	9.9	9.2	29.8	70.4
3792	2	B5XKM5	Septation ring formation regulator EzrA OS=Streptococcus pyogenes serotype M49 (strain NZ131) OX=471876 GN=ezrA PE=3	SQFVALNSSGDPVEA	S	192	M P	no	0	0	4.74445	12411.8	18306.2	38.9915	295.273	0	31.7284	0	19.2457	19.6989	57.9994	0	0	0.5	1228.8	1695.2	4.3	30.5	0	3	0	1.9	1.9	5.7
2096	2	A0A0H3BZ68	Membrane protein insertase YidC OS=Streptococcus pyogenes serotype M49 (strain NZ131) OX=471876 GN=oxaA PE=3	SRKDVTPSQNMEQAN	S	283	M L	no	1911.62	680.105	490.856	6606.11	1915.53	2401.57	3516.18	6201.5	5227	4484.34	6113.78	8679.84	17530.2	499.9	106.4	79.1	1037.9	321.7	461.9	615.8	799.5	982.4	1156.8	1519.7	2366.9	4816.1
3050	2	A0A0H3BZF7	Putative NAD(P)H-flavin oxidoreductase OS=Streptococcus pyogenes serotype M49 (strain NZ131) OX=471876 GN=Spy49_0430c PE=3	SRLKLYESFQKEDMD	S	122	M	no	343.097	54.3086	24.0573	3172.7	2620.73	374.158	395.246	4998.09	3887.22	1353.73	1568.65	5887.8	9393.16	89.1	15.3	8	769	608.6	86.5	102.8	571.7	551.9	315.7	346.9	1278.8	1895.1
3551	2	A0A0H3BW88	Archaeal S-adenosylmethionine synthetase OS=Streptococcus pyogenes serotype M49 (strain NZ131) OX=471876 GN=Spy49_0455 PE=3	SVQDFGGSDFIEPIK	S	76	P L	no	6.25525	55.0681	31.4181	42.7793	190.051	2.75358	1204.98	13061	15138.9	0	5.65363	13.0724	12.8278	2.9	25.5	14.4	19.8	88.7	1.4	11.7	46.2	78.8	0	3.1	7.6	7.7
2231	1	B5XJ35	30S ribosomal protein S10 OS=Streptococcus pyogenes serotype M49 (strain NZ131) OX=471876 GN=rpsJ PE=3	TATRTGATVAGPVPL	T	35	M P	no	770.57	504.865	447.125	685.421	1127.65	870.382	976.459	1551.74	2334	787.429	741.51	11100.1	17261.3	8.6	5.3	4.7	8.3	14.8	10.7	11	18.1	33.1	9.5	9.5	151.7	248.8
695	1	B5XKM7	Enolase OS=Streptococcus pyogenes serotype M49 (strain NZ131) OX=471876 GN=eno PE=3	TAVVSHRSGETEDST	S	374	M P L	no	1093.3	373.358	217.825	3675.46	10175.5	1440.03	9062.84	73502.4	87961.7	1287.43	1898.25	2120.39	2746.11	3.7	1.4	0.8	14.2	38.6	5.4	30.5	202.8	245.2	4.6	6.8	7.9	10.8
5464	1	B5XLX5	D-alanine--D-alanyl carrier protein ligase OS=Streptococcus pyogenes serotype M49 (strain NZ131) OX=471876 GN=dltA PE=3	TFVALTKSGHAYIPV	S	76	M P L	no	433.579	58.338	24.204	566.52	1161.26	180.497	252.773	319.024	548.019	328.096	406.363	2890.01	10183	63.2	9.2	4	92.1	188	30.1	42	44.1	89.3	47.9	54.7	366.3	1248.7
3756	5	A0A0H3BX58	Uncharacterized protein OS=Streptococcus pyogenes serotype M49 (strain NZ131) OX=471876 GN=Spy49_0129 PE=4	TLLSLMNSIEQEART	S	10	M L	no	0	0	0	21860.9	38339	0	970.922	0	0	0	2437.41	0	898.078	1916.1	2469.3	2213.8	8110.3	13499	4435.7	5225.7	6261	689.1	4250.3	6164.1	2988.9	2175.3
9107	1	A0A0H3BZ23	Cell division protein FtsZ OS=Streptococcus pyogenes serotype M49 (strain NZ131) OX=471876 GN=ftsZ PE=3	TPLLEALSEADNVLR	S	185	P	no	0	0	0	3354.15	7111.45	0	31.2051	852.369	1700.9	0	0	996.78	1188.67	0	0	0	58.3	119.9	0	0.5	11.7	26.3	0	0	17.2	20.9
2674	2	B5XK64	Ribosome-recycling factor OS=Streptococcus pyogenes serotype M49 (strain NZ131) OX=471876 GN=frr PE=3	TPLNQLASITVPEAR	S	56	M P	no	7.40499	11.9984	41.3682	13331.4	20886	305.77	402.106	5053.83	7002.41	0	98.792	927.884	1067.9	0.2	0.4	1.4	446.6	772.5	10.1	13.6	156.2	206	0	3.1	28.1	37
595	2	B5XKI1	Elongation factor Tu OS=Streptococcus pyogenes serotype M49 (strain NZ131) OX=471876 GN=tuf PE=3	TVGSGIVSEIEA---	S	394	M P L	no	1902.68	1064.36	605.442	27221.3	66576.7	2520.79	1463.52	13941.7	20588.1	2009.58	2350.3	11835.2	36597.5	5	3.4	1.8	75.2	183.9	7.6	3.9	33.2	50.8	5.5	6.2	30.8	96.3
5838	4	B5XJ51	50S ribosomal protein L6 OS=Streptococcus pyogenes serotype M49 (strain NZ131) OX=471876 GN=rplF PE=3	TVVRPNDSKEMKTIH	S	58	M P L	no	629.963	46.9516	9.68473	1012.07	843.422	108.989	687.453	2821.82	5007.84	544.924	636.13	9985.05	24853.4	7.8	0.5	0.1	12.1	11.9	1.4	8.9	37.7	81.6	6.8	8.3	146.6	409.7
2910	4	A0A0H3BZ61	F420_ligase domain-containing protein OS=Streptococcus pyogenes serotype M49 (strain NZ131) OX=471876 GN=Spy49_0453 PE=4	VAVVITDSDGREDKR	S	159	M P L	no	176.047	34.6685	56.6066	513.321	651.531	53.9591	249.481	33556.4	31608.3	132.892	132.873	306.991	298.308	1293.2	264.9	426.8	3359.7	1754.1	329.1	10.8	659.7	845.7	851.1	688.4	1367	1036.2
5508	1	B5XIJ1	30S ribosomal protein S9 OS=Streptococcus pyogenes serotype M49 (strain NZ131) OX=471876 GN=rpsI PE=3	VDPDFRDSLKRAGLL	S	97	P L	no	113.655	39.9109	4.89965	1178.19	1660.9	37.4317	299.162	1598.29	2173.98	210.927	130.11	3643.42	4963.43	5.8	1.6	0.2	48.2	87.9	1.9	14.8	65.2	124.2	11.7	7.7	249.9	434.9
1808	1	A0A0H3C1B5	Cell division protein SepF OS=Streptococcus pyogenes serotype M49 (strain NZ131) OX=471876 GN=sepF PE=3	VDRRKRMSTSSIANR	S	106	M	no	755.935	766.904	407.028	3719.41	3149.86	1395.81	1563.04	3163.61	2895.66	1227.79	2433.7	6223.03	7124.13	115.1	122.7	53.6	467.2	462.6	202.3	168.8	331.6	356.4	178.2	367.7	906.5	1207.4
10395	4	A0A0H3BYA0	PTS system, IIB component, putative OS=Streptococcus pyogenes serotype M49 (strain NZ131) OX=471876 GN=Spy49_1328c PE=4	VEAGPILYRIPIMSE	Y	78	P	no	0	0	0	4429.12	8643.51	0	0	0	0	0	0	0	0	0.1	0.6	1.5	109	238.1	0.5	0	0	0	0.2	0	0	0
1906	2	A0A0H3BYW2	EIICB-Lac OS=Streptococcus pyogenes serotype M49 (strain NZ131) OX=471876 GN=lacE PE=4	VLCAGGGTSGLLANA	T	474	M P	no	0	1.75536	135.782	18743.3	13734.2	117.539	527.472	37.6001	134.018	23.8203	212.176	954.826	2324.87	0	0.3	11.1	1079.2	906.1	18.9	159.4	16.5	57.7	3.3	34	140.7	355.1
403	2	A0A0H3BZB4	Phosphoenolpyruvate-protein phosphotransferase OS=Streptococcus pyogenes serotype M49 (strain NZ131) OX=471876 GN=ptsI PE=3	VTNIGGRTSHSAIMA	T	189	M P L	no	4392.38	17289.5	23647.5	14135.3	7032.75	5592.59	4513.38	4827.26	3482.34	24129.7	26537.7	20061.8	8806.16	66.2	347.8	415.8	290.7	156.2	104.6	60.4	63.4	46.9	415.4	484	385	188.9
8673	1	B5XI40	30S ribosomal protein S6 OS=Streptococcus pyogenes serotype M49 (strain NZ131) OX=471876 GN=rpsF PE=3	WEKRRLAYEINDFRE	Y	50	M L	no	136.352	38.7204	52.669	625.227	741.908	30.1584	95.161	339.779	734.582	59.307	69.3033	1221.04	3332.87	1.6	0.4	0.6	7.8	11.1	0.4	1.4	3.9	10.4	0.8	1	17.6	52.7
5088	2	A0A0H3BZI9	UDP-glucose 6-dehydrogenase OS=Streptococcus pyogenes serotype M49 (strain NZ131) OX=471876 GN=Spy49_0459 PE=3	YDQRIGNSHNNPSFG	S	238	P L	no	1.94975	0	0	6.66193	3.9278	0	446.735	11091.1	9377.75	0	0	0	0	0.5	0	0	1.2	0.6	0	9.6	133.2	129.8	0	0	0	0
7905	2	B5XKW7	30S ribosomal protein S16 OS=Streptococcus pyogenes serotype M49 (strain NZ131) OX=471876 GN=rpsP PE=3	YRINVADSRAPRDGR	S	25	M	no	61.9297	40.7346	46.0922	228.02	165.491	72.1588	78.2599	259.462	568.301	40.2663	86.3887	2009.57	3043.48	1.1	0.6	0.7	4.4	4.1	1.4	1.6	4.8	14.3	0.8	1.8	52.5	96.2
2123	2	A0A0H3BZA2	Uncharacterized protein OS=Streptococcus pyogenes serotype M49 (strain NZ131) OX=471876 GN=Spy49_0497 PE=4	YSHLARDTFYDVKDK	T	66	M	no	4114.9	1093.11	2314.53	2242.26	1542.61	3149.05	4974.63	6748.01	4258.62	1667.57	806.607	926.962	1145.93	345.6	97.2	220.9	187.9	137.8	271.1	480.8	527.3	390.5	146.9	69.8	83.9	112.2
9634	1	A0A0H3C0V3	Glutamine--fructose-6-phosphate aminotransferase [isomerizing] OS=Streptococcus pyogenes serotype M49 (strain NZ131) OX=471876 GN=glmS PE=3	YTAELDLSDIGKGTY	S	242	P	no	36.5072	117.727	32.7848	1521.58	2617.41	133.516	133.304	467.268	313.826	50.4914	145.649	695.593	957.131	1.6	4.1	1.3	61	107.6	5.8	6.6	19.9	14.9	2.1	6.1	29.6	38.2
2564	1	A0A0H3BZ03	R3H domain protein OS=Streptococcus pyogenes serotype M49 (strain NZ131) OX=471876 GN=Spy49_0209 PE=4	YVEHRTETLIDFTQK	T	243	P	no	2802.7	1619.53	1144.66	1204.08	1264.63	2715.88	2611.66	2463.36	2206.2	2548.16	1568.93	1151.31	1154.46	99.8	69.6	50.6	58.2	69.2	110.4	114.7	149.1	130.2	109.1	67.5	49.8	52.8

## Sheet: Exp 3
									Phosphorylation site abundance						Phosphorylation site abundance normalized to protein abundance
1st feature	No. of features	UniProt Acc. No.	Protein name	15 AS window	Residue	Position	Identified by	Used for quantification	THY 0.8	THY late stat	THY late stat ME	THY late stat + 10 min	THY late stat + 20 min	THY late stat + 40 min	THY 0.8	THY late stat	THY late stat ME	THY late stat + 10 min	THY late stat + 20 min	THY late stat + 40 min
523	4	A0A0H3BWH3	Putative calcium-transporting ATPase OS=Streptococcus pyogenes serotype M49 (strain NZ131) OX=471876 GN=pacL PE=4	AAIEALKSMSSPLAR	S	119	M L	yes	8056.46	67402.4	64695.8	55849	56467.2	46584.3	1034.1	11289	10207.6	8528.6	8794	7304.9
1418	1	B5XJR0	30S ribosomal protein S7 OS=Streptococcus pyogenes serotype M49 (strain NZ131) OX=471876 GN=rpsG PE=3	AANNTGASVKKREDT	S	134	M P	yes	1629.77	16478.6	17950.6	14464.7	17358.4	14489.3	52.7	654.2	705.6	543.3	646.9	551.5
495	1	B5XI23	Protein translocase subunit SecA OS=Streptococcus pyogenes serotype M49 (strain NZ131) OX=471876 GN=secA PE=3	AAPQNIQSQQSANTD	S	803	M P L	yes	18866.4	40632	64456.7	33027.3	51207.1	49439.9	1333.2	3109.4	4890.5	2405.3	3622.2	3695.2
180	2	A0A0H3BYA0	PTS system, IIB component, putative OS=Streptococcus pyogenes serotype M49 (strain NZ131) OX=471876 GN=Spy49_1328c PE=4	ACGAGVNSSHQIKDA	S	14	M P L	yes	6925.66	62784.1	79830.9	37185.6	69723.8	53803.2	1836.7	3961.3	4908.9	2418.7	4426.7	3571.9
1328	3	A0A0H3BZC7	EIIAB-Man OS=Streptococcus pyogenes serotype M49 (strain NZ131) OX=471876 GN=manL PE=4	ADRIIVASDEVAQDD	S	201	M P L	yes	4250.85	27956.6	32377.6	17918.8	29867.3	24023.8	141.7	1040.6	1112.5	599.4	984.6	813.3
86	3	A0A0H3BZ18	Cell-division initiation protein OS=Streptococcus pyogenes serotype M49 (strain NZ131) OX=471876 GN=divIVA PE=4	AEATNLVSKATYDAQ	S	94	M P L	yes	12069.9	103676	117062	84926	103807	87460	673.3	6255	6959.8	5038.8	6123.3	5284.5
915	2	A0A0H3BXF8	Putative sugar ABC transporter OS=Streptococcus pyogenes serotype M49 (strain NZ131) OX=471876 GN=Spy49_0973c PE=4	AEMMVGRSVSFTTSK	S	241	M P L	yes	3659.34	24817.6	20003.7	18258.6	19457.1	16638.1	302.5	1921.7	1512.1	1353.5	1465.5	1302.6
252	1	A0A0H3BZQ5	SSU ribosomal protein S1p OS=Streptococcus pyogenes serotype M49 (strain NZ131) OX=471876 GN=rpsA PE=4	AEVFSKISEGAVVTG	S	192	M P L	yes	4087.68	40608.1	43852.9	32261.3	38906.7	36651.1	77.1	787.4	821.6	603.2	741	681.8
3694	1	B5XMC3	Arginine deiminase OS=Streptococcus pyogenes serotype M49 (strain NZ131) OX=471876 GN=arcA PE=3	AFIDEYLSEANIRGR	S	94	M P	yes	323.608	6424.69	5409.56	4270.76	4584.33	4812.54	9.6	53.6	47.8	35.1	37.9	39.9
893	2	A0A0H3BYL1	Pyruvate kinase OS=Streptococcus pyogenes serotype M49 (strain NZ131) OX=471876 GN=pyk PE=3	AFPRTNKTDVIASAV	T	384	M P L	yes	2634.47	23634.5	26316.2	13700.1	25203.8	20157.3	19.3	221	255.1	121.9	228.3	188.1
1410	1	B5XKI2	Triosephosphate isomerase OS=Streptococcus pyogenes serotype M49 (strain NZ131) OX=471876 GN=tpiA PE=3	AFVEAVASKLPSTDL	S	29	M	yes	1846.15	9151.17	8279.8	6634.04	7536.33	6528.71	18.1	143	130	106	119.4	105.9
1931	2	A0A0H3BXY9	Isoleucine--tRNA ligase OS=Streptococcus pyogenes serotype M49 (strain NZ131) OX=471876 GN=ileS PE=3	AGKFGWESFETLASH	S	266	M	yes	578.778	20439.2	10419.3	8182.25	11225.7	8337.35	67.4	2532.8	1332.9	985.8	1358.8	1036.8
6295	1	B5XJ35	30S ribosomal protein S10 OS=Streptococcus pyogenes serotype M49 (strain NZ131) OX=471876 GN=rpsJ PE=3	AGPVPLPTERSLYTI	T	44	P	yes	171.1	4268.31	3824.78	3049.59	3335.21	2590.06	2.7	79	71.8	54.4	60.4	46.8
4526	2	B5XJ72	DNA-directed RNA polymerase subunit beta OS=Streptococcus pyogenes serotype M49 (strain NZ131) OX=471876 GN=rpoB PE=3	AGTEMTRSVIESIEE	S	318	P	yes	31.7113	8364.34	5318.88	3167.52	4510.7	5095.46	2.7	739.8	459.8	272.1	395.6	437.2
24	7	A0A0H3BYP4	Phosphoglucosamine mutase OS=Streptococcus pyogenes serotype M49 (strain NZ131) OX=471876 GN=glmM PE=3	AGVMISASHNPALDN	S	100	M P L	yes	1.16066e+06	1.10647e+06	998276	599951	823082	841396	14926.4	13736.2	12846.1	7770.1	9846.6	10859.4
1630	1	A0A0H3C0V7	Putative ABC transporter OS=Streptococcus pyogenes serotype M49 (strain NZ131) OX=471876 GN=Spy49_1021 PE=4	AIDDLTITIPNGKII	T	26	M	yes	1045.82	14213.7	9170.1	7427.61	8115.04	7698.19	560.6	4668	2940	2377	2541.3	2490.9
2370	1	A0A0H3C0C8	Putative alkaline-shock protein OS=Streptococcus pyogenes serotype M49 (strain NZ131) OX=471876 GN=asp PE=3	AIKDNFQSLLRKENY	S	48	M	yes	1537.79	6800.33	5225.12	4539.57	4740.28	4049.44	376.3	1910.2	1480.1	1329.9	1434.1	1153.4
4188	1	B5XKI1	Elongation factor Tu OS=Streptococcus pyogenes serotype M49 (strain NZ131) OX=471876 GN=tuf PE=3	AKEKYDRSKPHVNIG	S	9	P	yes	975.786	3802.68	11585.4	3242.09	14805.7	10981.5	6.9	24.2	72.9	20.1	91.7	71.1
649	1	A0A0H3BX54	Xaa-His dipeptidase OS=Streptococcus pyogenes serotype M49 (strain NZ131) OX=471876 GN=Spy49_0844 PE=4	AKFLNQFTFEGAAKD	T	293	M P L	yes	1341.42	31210	20283.3	17632	18533.6	16530.6	86.5	1641	1144.8	971.4	1024.5	943.8
891	2	A0A0H3C0B4	Uncharacterized protein OS=Streptococcus pyogenes serotype M49 (strain NZ131) OX=471876 GN=Spy49_0994c PE=4	AKLDKLASQNALELA	S	107	M	yes	2655.69	41669.7	28901	26858.5	24763.9	23395.9	2631.8	46301.8	28285.3	28221.8	25835.4	24582.3
1963	2	B5XMJ7	Cell cycle protein GpsB OS=Streptococcus pyogenes serotype M49 (strain NZ131) OX=471876 GN=gpsB PE=3	AKYQARNTVSATVQQ	T	66	P L	yes	38943.8	3900.77	3581.35	1732.49	3030.69	2539.11	4302.6	634.4	589.8	286.3	502.5	435.7
1515	2	A0A0H3BXD5	30S ribosomal protein S12 OS=Streptococcus pyogenes serotype M49 (strain NZ131) OX=471876 GN=rpsL PE=3	ALNIGYNSHKKVQTK	S	48	M P	yes	5575.92	10651.7	24624.8	9009.4	23356.5	24713.5	2777.8	7587.1	16998.9	5897.4	14448.9	16913.6
280	4	B5XI40	30S ribosomal protein S6 OS=Streptococcus pyogenes serotype M49 (strain NZ131) OX=471876 GN=rpsF PE=3	ALVARFDSILTDNGA	S	28	M P L	yes	7415.93	94230.8	77164.8	57600.3	70790.7	55465.4	74.4	1138	936.4	684.6	841.7	662.3
778	2	B5XKP7	ATP synthase subunit b OS=Streptococcus pyogenes serotype M49 (strain NZ131) OX=471876 GN=atpF PE=3	AQSQLIDSYLDDLGE	S	156	M P	yes	1287.68	34315.2	37585.6	35439.2	37361.5	38554.8	241.9	7603.1	8300.9	7874.6	8469.7	8810.1
1964	1	A0A0H3C276	Galactose-6-phosphate isomerase subunit LacA OS=Streptococcus pyogenes serotype M49 (strain NZ131) OX=471876 GN=lacA2 PE=3	ARIITLGSEISAPGI	S	106	M P	yes	48.4812	8477.76	5548.98	5402.66	4964.52	4657.34	5.7	431.1	278	274.7	246.9	227.4
3165	2	B5XMJ7	Cell cycle protein GpsB OS=Streptococcus pyogenes serotype M49 (strain NZ131) OX=471876 GN=gpsB PE=3	ARNTVSATVQQPVPQ	T	70	M P L	yes	9928.28	7532.22	5312.51	3320.97	4881.67	4095.1	1096.9	1225	874.9	548.8	809.4	702.7
3310	1	A0A0H3C0J7	Phosphocarrier protein HPr OS=Streptococcus pyogenes serotype M49 (strain NZ131) OX=471876 GN=ptsH PE=3	ASDITLDYKGKAVNL	Y	37	M P L	yes	2552.3	4726.7	4781.5	3680.9	4096.3	3923.6	2552.3	4726.7	4781.5	3680.9	4096.3	3923.6
707	1	A0A0H3BZ23	Cell division protein FtsZ OS=Streptococcus pyogenes serotype M49 (strain NZ131) OX=471876 GN=ftsZ PE=3	ASDQAKQSVQPGFDR	S	354	M P L	yes	5913.19	25227.4	24743.4	20839.3	23798.5	20592	220.6	957.4	952.1	768.5	902.3	782.3
4472	2	A0A0H3BZC7	EIIAB-Man OS=Streptococcus pyogenes serotype M49 (strain NZ131) OX=471876 GN=manL PE=4	ATAWTPASKADRIIV	S	192	P	yes	2030.93	10219.8	10689.7	5366.06	10159	6634.39	67.7	380.4	367.3	179.5	334.9	224.6
154	2	A0A0H3BZL9	PTS system, fructose-specific IIABC component OS=Streptococcus pyogenes serotype M49 (strain NZ131) OX=471876 GN=fruA PE=4	AVSTEKTSLGGAFYK	S	284	M L	yes	12063	72859.1	69632.5	55773.6	63805.3	56227.4	391.4	2883.4	2629.6	2058.4	2413.6	2096.3
1249	1	A0A0H3BZV5	PTS system, lactose-specific IIA component (EIIA-Lac) (Lactose-permease IIA component) (Phosphotransferase enzyme II, A component) OS=Streptococcus pyogenes serotype M49 (strain NZ131) OX=471876 GN=lacF PE=4	AYAGDARSKFLEALK	S	22	M	yes	1242.11	17794.7	17867.7	10274.9	16006.3	12884.9	615.5	1647.3	1713.3	890.1	1492.3	1189.1
4377	1	A0A0H3C1S1	Chaperone protein DnaJ OS=Streptococcus pyogenes serotype M49 (strain NZ131) OX=471876 GN=dnaJ PE=3	AYETLSDSQKRAAYD	S	59	M P	yes	426.705	649.374	12020.3	3059.88	11500	9019.24	31.2	46.8	845	219.9	816.5	654.6
1563	2	A0A0H3BYG9	Aminopeptidase OS=Streptococcus pyogenes serotype M49 (strain NZ131) OX=471876 GN=pepN PE=3	AYQNNIASIPAAVRR	S	669	M	yes	1639.9	24260.2	17008.5	13003.4	13673.8	15180.8	204.8	3612.6	2639.2	2047.1	2119.5	2374.7
105	2	A0A0H3BYA0	PTS system, IIB component, putative OS=Streptococcus pyogenes serotype M49 (strain NZ131) OX=471876 GN=Spy49_1328c PE=4	CGAGVNSSHQIKDAI	S	15	M P L	yes	26271.3	136159	172711	92063.8	149690	127045	6967.2	8590.8	10620.2	5988.2	9503.7	8434.3
885	1	A0A0H3BVI6	Putative V-type Na+-ATPase subunit E OS=Streptococcus pyogenes serotype M49 (strain NZ131) OX=471876 GN=ntpE PE=4	CLKIATDSLDTDFKE	S	29	M	yes	1252.14	19332.7	17498.2	16205.1	15987.5	15577.7	6496.4	7958.1	7374.5	6751.9	6868.6	6944.5
365	1	A0A0H3C1K3	Thioredoxin reductase OS=Streptococcus pyogenes serotype M49 (strain NZ131) OX=471876 GN=nox2 PE=3	CVLTEDASYEAKTVI	S	97	M L	yes	4929.2	47194.8	48045.7	35065.7	41941.9	38018.9	987.5	10323.9	10940.2	7959.7	9420.9	8777
1139	4	A0A0H3BZC1	Uncharacterized protein OS=Streptococcus pyogenes serotype M49 (strain NZ131) OX=471876 GN=Spy49_0377 PE=4	DDAVDFDTKVMTLPE	T	30	M L	yes	190250	8927.4	6265.6	3167.9	5469.1	5365.8	190250	8927.4	6265.6	3167.9	5469.1	5365.8
15	5	A0A0H3BZD6	Putative PTS system enzyme II OS=Streptococcus pyogenes serotype M49 (strain NZ131) OX=471876 GN=Spy49_1737c PE=4	DEAKLPETPVSDAPV	T	504	M L	yes	34954.8	330354	515055	181572	469444	376569	7107.3	34823.4	52543.5	18712	47462.2	38736.9
1074	2	B5XJR1	Elongation factor G OS=Streptococcus pyogenes serotype M49 (strain NZ131) OX=471876 GN=fusA PE=3	DEDLMMKYLEGEEIT	Y	229	M P	yes	2706.16	33136.6	26481.9	20031.7	25020.3	27920.1	30	400.3	327.1	235.1	292.3	327.4
1107	2	A0A0H3C2P8	Uncharacterized protein OS=Streptococcus pyogenes serotype M49 (strain NZ131) OX=471876 GN=Spy49_1748c PE=4	DEFIRKETIELANDG	T	13	M L	yes	59582.4	17741.4	18412.9	9896.42	15055.5	14516.2	61274.1	29037.4	31249.4	16751.5	26508.4	24578.1
46785	1	B5XIY6	Elongation factor Ts OS=Streptococcus pyogenes serotype M49 (strain NZ131) OX=471876 GN=tsf PE=3	DEQHFGAYQHNGGRI	Y	156	P	yes	0	0	236.942	10.2598	257.502	219.898	0	0	4.8	0.2	5	4.3
549	2	A0A0H3BZL9	PTS system, fructose-specific IIABC component OS=Streptococcus pyogenes serotype M49 (strain NZ131) OX=471876 GN=fruA PE=4	DGIAMPHSKNIVVDK	S	68	M P L	yes	10559	35047.3	57414.5	24657	51837.8	43213.3	342.6	1387	2168.2	910	1960.9	1611.1
11908	1	B5XKP7	ATP synthase subunit b OS=Streptococcus pyogenes serotype M49 (strain NZ131) OX=471876 GN=atpF PE=3	DIDQAEQSRLSAQQL	S	55	M	yes	0	1430.27	733.972	1105.76	609.185	1447.21	0	316.9	162.1	245.7	138.1	330.7
11	1	A0A0H3BXI0	Uncharacterized protein OS=Streptococcus pyogenes serotype M49 (strain NZ131) OX=471876 GN=Spy49_1001c PE=3	DIPAIAESIKAIVSQ	S	85	M P	yes	10674.2	272444	250568	169401	221552	161922	392.1	8391.5	7526.5	5003.8	6685	5078.2
132	1	A0A0H3BWK0	PTS system, IIB component OS=Streptococcus pyogenes serotype M49 (strain NZ131) OX=471876 GN=Spy49_0154 PE=4	DIQSASCSVGEAKGL	S	40	M P L	yes	2861.33	93850.1	115918	58397.8	98870.8	83496.4	4328.3	47834.7	60405.3	29509.5	54649.7	44626.1
3378	1	B5XK61	50S ribosomal protein L11 OS=Streptococcus pyogenes serotype M49 (strain NZ131) OX=471876 GN=rplK PE=3	DKSFDFITKTPPAAV	T	70	M	yes	424.67	4410.34	3188.78	2855.28	3072.39	2418.88	9.9	140.4	100.9	88.2	92.7	75.8
401	2	A0A0H3BX27	Dihydrolipoyl dehydrogenase OS=Streptococcus pyogenes serotype M49 (strain NZ131) OX=471876 GN=acoL PE=3	DKTVTIGSQTIKGRN	S	253	P	yes	5772.38	28405.8	25989.9	19785.3	23812.6	20407.4	363.9	1765.8	1689.9	1284	1514.8	1303.4
803	2	B5XMA2	UDP-N-acetylglucosamine--N-acetylmuramyl-(pentapeptide) pyrophosphoryl-undecaprenol N-acetylglucosamine transferase OS=Streptococcus pyogenes serotype M49 (strain NZ131) OX=471876 GN=murG PE=3	DLLRADISSAIKEK-	S	354	M L	yes	5237.47	16672.2	15544.5	13986.6	14488.9	12044.9	10109.3	28704.8	24802.9	22140.2	24227.5	18727
3157	1	A0A0H3BY55	Non-specific serine/threonine protein kinase OS=Streptococcus pyogenes serotype M49 (strain NZ131) OX=471876 GN=Spy49_1257c PE=4	DLMTALSYNRSRERK	Y	275	M P	yes	3346.6	6266.94	4554.96	3560.49	4227.68	3140.23	452.6	886	680.5	497.5	602.5	438
3357	1	A0A0H3C1H6	Cysteine synthase OS=Streptococcus pyogenes serotype M49 (strain NZ131) OX=471876 GN=cysM PE=3	DNGERYLSTELYDVP	S	301	M P	yes	162.307	6725.06	4247.2	3474.81	3092.82	3232.39	3.8	146.2	89.6	73.1	65.2	68.6
780	1	A0A0H3BXY9	Isoleucine--tRNA ligase OS=Streptococcus pyogenes serotype M49 (strain NZ131) OX=471876 GN=ileS PE=3	DPTTRMRSYNAFVCD	S	888	M L	yes	4156.21	27604.4	37018.4	20454.8	34319.2	31520.8	484	3420.7	4735.6	2464.4	4154.1	3919.8
884	3	A0A0H3BZR7	Mid-cell-anchored protein Z OS=Streptococcus pyogenes serotype M49 (strain NZ131) OX=471876 GN=mapZ PE=3	DQFLSEDSHHPAKQN	S	167	M P L	yes	10051.8	52040.8	63722.4	27363.6	56856.9	48733.2	2153.5	16097.2	20559.2	8668.4	18465.3	16418.5
1408	1	A0A0H3BZL6	Beta-glucoside permease IIABC component OS=Streptococcus pyogenes serotype M49 (strain NZ131) OX=471876 GN=Spy49_0485 PE=4	DQQVKAISNVIGVMR	S	49	M	yes	1801.16	11834.5	9563.62	9138.36	9851.7	8186.27	7209.7	32863.2	27518.6	28008.2	29998.1	25267.6
3749	1	B5XKW7	30S ribosomal protein S16 OS=Streptococcus pyogenes serotype M49 (strain NZ131) OX=471876 GN=rpsP PE=3	DRVLEWLSKGAQPSD	S	61	M	yes	399.421	6564.74	4320.16	3429.01	3876.46	2455.42	15.6	366.1	233.2	183.1	221.1	130.3
274	2	A0A0H3BZ18	Cell-division initiation protein OS=Streptococcus pyogenes serotype M49 (strain NZ131) OX=471876 GN=divIVA PE=4	DSASFDATRQFTPEE	T	201	M P L	yes	520387	78644.9	56162.8	43052.9	51024.5	52221.1	29029	4744.8	3339.1	2554.4	3009.8	3155.3
990	1	B5XIY6	Elongation factor Ts OS=Streptococcus pyogenes serotype M49 (strain NZ131) OX=471876 GN=tsf PE=3	DSKTVEAYLDSVNAK	Y	305	P L	yes	635.883	16481.8	15702.3	11024.1	13688.8	11337.5	10.8	328.9	318.1	214.9	265.8	221.7
4967	2	B5XIF1	Phosphoglycerate kinase OS=Streptococcus pyogenes serotype M49 (strain NZ131) OX=471876 GN=pgk PE=3	DTEGEAVSEGFLGLD	S	291	M P	yes	37.7844	6823.86	5205.24	4168.23	4186.61	3947.96	0.5	121.7	94.5	74	74.2	71.2
557	1	A0A0H3BWH3	Putative calcium-transporting ATPase OS=Streptococcus pyogenes serotype M49 (strain NZ131) OX=471876 GN=pacL PE=4	EAALTGESVPVEKDL	S	178	M L	yes	3129.56	24430	23354.3	16863.5	21909.5	17918.5	401.7	4091.7	3684.8	2575.2	3412.1	2809.8
668	1	A0A0H3C219	Uncharacterized protein OS=Streptococcus pyogenes serotype M49 (strain NZ131) OX=471876 GN=Spy49_1782 PE=4	EAASEIISNVLGKHL	S	60	M L	yes	2804.26	24605.6	20500	18195.3	18361.8	18107	2537.7	26668.9	14072.8	11914.8	12144.7	11930.7
1168	1	B5XIF1	Phosphoglycerate kinase OS=Streptococcus pyogenes serotype M49 (strain NZ131) OX=471876 GN=pgk PE=3	EADKEGKSLAPVAAD	S	73	P	yes	272.048	11746.9	9953.3	7480.28	8226.51	6592.86	3.6	209.5	180.7	132.8	145.8	118.9
4727	2	A0A0H3BZQ5	SSU ribosomal protein S1p OS=Streptococcus pyogenes serotype M49 (strain NZ131) OX=471876 GN=rpsA PE=4	EARAEVFSKISEGAV	S	189	M	yes	243.882	5719.38	5988.68	6407.33	6090.66	5311.13	4.6	110.9	112.2	119.8	116	98.8
462	2	A0A0H3BX58	Uncharacterized protein OS=Streptococcus pyogenes serotype M49 (strain NZ131) OX=471876 GN=Spy49_0129 PE=4	EARTIYDSYDAKKKA	S	21	M L	yes	3347.79	33510	29278.2	24488.5	28752.5	22866.6	3512.9	9761.7	9072.3	7368.2	8806.6	6998.2
721	1	B5XK64	Ribosome-recycling factor OS=Streptococcus pyogenes serotype M49 (strain NZ131) OX=471876 GN=frr PE=3	EARVLLISPFDKSSI	S	68	M L	yes	1818.01	29942.3	23566	21391	21949	18605.6	109.1	2194.1	1656.4	1579.9	1558.1	1387.6
978	1	B5XJH8	Adenylosuccinate synthetase OS=Streptococcus pyogenes serotype M49 (strain NZ131) OX=471876 GN=purA PE=3	EDITGVRSLDELPEN	S	385	M	yes	2172.31	19467.3	20664	14216.8	17974.6	16731	206.6	2146.9	2289.6	1650.3	2161.3	1888.9
2066	1	A0A0H3BZJ0	Formate acetyltransferase OS=Streptococcus pyogenes serotype M49 (strain NZ131) OX=471876 GN=pfl PE=3	EDVIVRISGYCVNTK	S	737	M	yes	0	3398.66	3962.89	3344.65	4062.54	3307.19	0	44.5	52.3	43.2	51.9	43.4
1094	1	A0A0H3C004	Uncharacterized protein OS=Streptococcus pyogenes serotype M49 (strain NZ131) OX=471876 GN=Spy49_0627 PE=4	EEKIVDDTIGTRTRK	T	14	M L	yes	17470.5	12594.3	10031.5	7727.3	8585	7297.4	17470.5	12594.3	10031.5	7727.3	8585	7297.4
783	1	A0A0H3BZV5	PTS system, lactose-specific IIA component (EIIA-Lac) (Lactose-permease IIA component) (Phosphotransferase enzyme II, A component) OS=Streptococcus pyogenes serotype M49 (strain NZ131) OX=471876 GN=lacF PE=4	EELIAAGSDCLNDAH	S	47	P	yes	663.735	13276	22296.9	16824.6	25862.3	22524.5	328.9	1229	2138	1457.5	2411.2	2078.7
4223	1	B5XKI1	Elongation factor Tu OS=Streptococcus pyogenes serotype M49 (strain NZ131) OX=471876 GN=tuf PE=3	EERERGITINTAHVE	T	65	P	yes	2672.8	7998.2	7628.26	5000.24	6894.24	6301.64	18.9	50.9	48	31	42.7	40.8
151	2	B5XKI1	Elongation factor Tu OS=Streptococcus pyogenes serotype M49 (strain NZ131) OX=471876 GN=tuf PE=3	EGGRTVGSGIVSEIE	S	390	M P L	yes	5840.57	149326	125850	121441	118187	115978	41.3	950.3	791.9	752.9	732	750.9
540	1	A0A0H3C0F2	Tagatose 1,6-diphosphate aldolase OS=Streptococcus pyogenes serotype M49 (strain NZ131) OX=471876 GN=lacD2 PE=3	EKISDNASPEFAKVK	S	177	M P L	yes	8722.25	36971.9	37036.9	29438.8	34917.1	31411.9	797.1	1177.1	1197.9	931.9	1074.2	964.8
1296	2	A0A0H3BXI0	Uncharacterized protein OS=Streptococcus pyogenes serotype M49 (strain NZ131) OX=471876 GN=Spy49_1001c PE=3	EKLKDTISDTVNSDE	S	152	M P	yes	16565.3	24301.3	27279	13836.3	23706.2	19816.9	608.5	748.5	819.4	408.7	715.3	621.5
165	5	A0A0H3BZL3	Conserved hypothetical integral membrane protein OS=Streptococcus pyogenes serotype M49 (strain NZ131) OX=471876 GN=Spy49_1194c PE=4	ELFQLQNSGEDLNKR	S	186	M P L	yes	11695.3	180409	176439	104109	160555	145197	4999.3	19762.7	20030.1	11059.1	17776.1	15368
176	2	B5XHZ0	Chaperone protein DnaK OS=Streptococcus pyogenes serotype M49 (strain NZ131) OX=471876 GN=dnaK PE=3	ELKAAQESGNLDDMK	S	548	M P L	yes	11563.5	87450.1	78581.7	73246.7	73712.1	67524.1	108.6	824.4	777.2	702.1	687.4	674.5
263	3	B5XIW7	Chaperonin GroEL OS=Streptococcus pyogenes serotype M49 (strain NZ131) OX=471876 GN=groEL PE=3	ELKDATMTALGQAAK	T	313	M P L	yes	9642.18	75397.9	68455.2	54204.7	64467.4	55952.2	67.3	519.4	500.8	397.7	456.8	407.6
687	4	B5XJ57	Adenylate kinase OS=Streptococcus pyogenes serotype M49 (strain NZ131) OX=471876 GN=adk PE=3	EMGRLAKSYIDKGEL	S	51	M P L	yes	12642.1	82654.1	64528.2	43463.9	50886.4	45117.7	919.3	6268.6	5071.1	3336.3	3789	3505
1355	1	A0A0H3BZQ5	SSU ribosomal protein S1p OS=Streptococcus pyogenes serotype M49 (strain NZ131) OX=471876 GN=rpsA PE=4	ENPKDVLSVGQEVTV	S	324	P	yes	880.097	10330	9522.1	7723.02	8043.88	9160.08	16.6	200.3	178.4	144.4	153.2	170.4
1090	2	B5XHZ0	Chaperone protein DnaK OS=Streptococcus pyogenes serotype M49 (strain NZ131) OX=471876 GN=dnaK PE=3	EQHIVIKSNDGLSEE	S	473	M P L	yes	1000.9	15911.6	27885.8	9337.1	26240	22294.5	9.4	150	275.8	89.5	244.7	222.7
470	2	B5XJ77	Arginine--tRNA ligase OS=Streptococcus pyogenes serotype M49 (strain NZ131) OX=471876 GN=argS PE=3	EQVITAGSDYAQQDE	S	101	M P	yes	1421.64	30579.6	31066.5	22317.3	28191.6	32040.2	131	2758.6	2870.3	2206	2595.1	3069
2103	2	B5XKM7	Enolase OS=Streptococcus pyogenes serotype M49 (strain NZ131) OX=471876 GN=eno PE=3	ERKVYDYTKFEGEGA	T	260	P	yes	865.443	11236.1	9574.91	5766.85	9635.32	7151.28	5.2	73	62.7	36.7	61.3	45.8
576	4	B5XJM4	Glycerol-3-phosphate dehydrogenase [NAD(P)+] OS=Streptococcus pyogenes serotype M49 (strain NZ131) OX=471876 GN=gpsA PE=3	ESILGMMSNEFRSEN	S	328	M P	yes	3966.59	76044.4	50691	46843.7	47966.9	44062.9	231.9	4750.5	3158	2982.7	2975.6	2766.2
4467	1	B5XKM5	Septation ring formation regulator EzrA OS=Streptococcus pyogenes serotype M49 (strain NZ131) OX=471876 GN=ezrA PE=3	ESIRANSSELVTLDL	S	273	P	yes	263.762	4584.2	3641.84	3003.69	3432.85	3269.75	23.5	438.9	355.8	290.5	328	325.2
2252	1	A0A0H3BZR7	Mid-cell-anchored protein Z OS=Streptococcus pyogenes serotype M49 (strain NZ131) OX=471876 GN=mapZ PE=3	ESKEVEVTKESQTLG	T	11	M P	yes	20055.5	2747.97	3129.52	1795.85	3092.98	2531.86	4296.7	850	1009.7	568.9	1004.5	853
488	1	B5XKI1	Elongation factor Tu OS=Streptococcus pyogenes serotype M49 (strain NZ131) OX=471876 GN=tuf PE=3	ETKKAVVTGVEMFRK	T	261	M P L	yes	3860.72	30122.9	24108.5	20597.8	24331.7	18009.1	27.3	191.7	151.7	127.7	150.7	116.6
761	1	A0A0H3C0H8	2-amino-4-hydroxy-6-hydroxymethyldihydropteridine diphosphokinase OS=Streptococcus pyogenes serotype M49 (strain NZ131) OX=471876 GN=folK PE=4	ETQAIEQSLGRVRHE	S	80	M P L	yes	2119.2	16656.6	16344.5	13623.8	15990.7	13951.8	663.6	5210.6	5287.3	4354.4	5246.8	4656.5
795	2	A0A0H3BXQ2	DNA translocase FtsK OS=Streptococcus pyogenes serotype M49 (strain NZ131) OX=471876 GN=ftsK PE=3	ETQKASASMIQRRLS	S	760	M L	yes	9387.81	21122.3	21333.7	18788	21874.1	19173.3	7685.6	21577.7	21582.6	18781.6	21927	19528.6
295	2	A0A0H3BZQ5	SSU ribosomal protein S1p OS=Streptococcus pyogenes serotype M49 (strain NZ131) OX=471876 GN=rpsA PE=4	EVEVKVLSIDEEAGR	S	249	M P L	yes	4347.46	40288.4	37842.9	30421.4	34207.5	29910	82	781.2	709	568.8	651.5	556.4
15403	1	B5XJ50	30S ribosomal protein S8 OS=Streptococcus pyogenes serotype M49 (strain NZ131) OX=471876 GN=rpsH PE=3	EVLEVPASNIKKGIA	S	30	P	yes	98.1827	982.061	1112.5	487.483	837.53	913.905	1.3	17.3	19.4	8.5	14.6	16.7
6513	1	B5XIW8	Co-chaperonin GroES OS=Streptococcus pyogenes serotype M49 (strain NZ131) OX=471876 GN=groES PE=3	FDDEKEQTVGGFVLA	T	20	P	yes	5226.2	5984.46	4911.97	1781.52	3983.34	2992.64	64.1	83.5	76.4	26.8	61.6	46.7
1046	3	A0A0H3BYQ9	PTS system, IIB component OS=Streptococcus pyogenes serotype M49 (strain NZ131) OX=471876 GN=Spy49_0834 PE=4	FDKSDPASKVKVTPS	S	116	M P L	yes	1317.03	31148.9	44895.5	30716	42100	31482.6	29.8	409.2	602.7	398.6	531.2	427
657	1	B5XLX3	D-alanyl carrier protein OS=Streptococcus pyogenes serotype M49 (strain NZ131) OX=471876 GN=dltC PE=3	FNIKVPISEFGRDDW	S	56	M L	yes	3229.93	24164.9	19365.6	16830.9	17544.6	15363.9	413.8	2947.1	2359.4	2020.2	2090.9	1875.9
1539	2	A0A0H3BXP9	Putative rhamnosyltransferase OS=Streptococcus pyogenes serotype M49 (strain NZ131) OX=471876 GN=rgpAc PE=4	FNQSVAKSAALYWSK	S	327	M	yes	1339.45	15569.6	12279.9	10406.7	11868.5	9387.74	1400.5	19582.2	15637	12467.4	15202.3	11139.3
2456	2	A0A0H3BZB4	Phosphoenolpyruvate-protein phosphotransferase OS=Streptococcus pyogenes serotype M49 (strain NZ131) OX=471876 GN=ptsI PE=3	FPTEDEQYEAYKAVL	Y	316	M P	yes	357.807	16321.3	12154	11098.4	13176.8	11606	11.5	662.4	493.6	434	510.9	467.6
1023	1	B5XJ37	50S ribosomal protein L4 OS=Streptococcus pyogenes serotype M49 (strain NZ131) OX=471876 GN=rplD PE=3	FVAVEGLSFAAPKTA	S	130	M P	yes	1243.06	20813	14689	12214.9	12002.3	14150.1	41.3	763.8	570.7	453.9	452.9	519.8
414	2	B5XM69	2,3-bisphosphoglycerate-dependent phosphoglycerate mutase OS=Streptococcus pyogenes serotype M49 (strain NZ131) OX=471876 GN=gpmA PE=3	FVGAHGNSIRALVKH	S	185	M L	yes	2578.01	54780.9	56469.8	31668.7	51698.4	40036.3	42	1054.5	1092.7	577.7	955.4	749.5
277	4	A0A0H3C2K4	Alkyl hydroperoxide reductase C OS=Streptococcus pyogenes serotype M49 (strain NZ131) OX=471876 GN=ahpC PE=3	GAETLTPSLDLVGKI	S	179	M P L	yes	6764.09	102018	66365.7	52297.2	56730.2	46576.1	165.8	1744.7	1243.9	935.7	1005.7	841.9
1144	1	A0A0H3BYS4	Dihydropteroate synthase OS=Streptococcus pyogenes serotype M49 (strain NZ131) OX=471876 GN=folP PE=3	GCRFVSATDEIDRVV	T	69	M L	yes	5620.94	19949.8	20641.5	14318.2	18587.3	15508.4	941.1	3047.4	3239	2287.5	3018.1	2504.4
833	2	B5XLC6	Elongation factor 4 OS=Streptococcus pyogenes serotype M49 (strain NZ131) OX=471876 GN=lepA PE=3	GDFVTMDYIDDNRVN	Y	443	M	yes	2101.46	25690	21330.7	17079.7	20919.9	18636.8	430.2	6220.4	5131.9	3958.1	4889	4397.9
1396	1	B5XJ13	Phosphate acyltransferase OS=Streptococcus pyogenes serotype M49 (strain NZ131) OX=471876 GN=plsX PE=3	GDQTKINSYLIQSDR	S	45	M	yes	2908.57	13667.9	12515.7	9561.25	11079.9	9720.6	587.7	2706.1	2510.6	1878	2247.4	2007.5
3046	2	A0A0H3BWH3	Putative calcium-transporting ATPase OS=Streptococcus pyogenes serotype M49 (strain NZ131) OX=471876 GN=pacL PE=4	GDRVNMGYQNSNVTY	Y	203	M	yes	8053.34	6809.5	10123.1	7442.3	11412.2	12604.4	1033.7	1140.5	1597.2	1136.5	1777.3	1976.5
3241	1	B5XJW0	GTPase Der OS=Streptococcus pyogenes serotype M49 (strain NZ131) OX=471876 GN=der PE=3	GEDRVIASPVAGTTR	S	203	M	yes	1392.28	7108.69	5544.18	4385.21	5136.36	4246.02	129.1	809.1	620.4	462.4	545.6	461.8
1347	1	A0A0H3BZS4	dTDP-4-dehydrorhamnose 3,5-epimerase OS=Streptococcus pyogenes serotype M49 (strain NZ131) OX=471876 GN=rmlC PE=4	GETFGNVYQTVIDAS	Y	109	M P L	yes	1469.95	26736.2	18298.9	13224.9	17566.5	14895.2	83.7	1488.2	1049.7	770	964.9	873.4
899	2	B5XHX4	Serine--tRNA ligase OS=Streptococcus pyogenes serotype M49 (strain NZ131) OX=471876 GN=serS PE=3	GFSAAKTYDVEVWIP	Y	334	M P L	yes	1702.15	33437.5	25452.3	22795.6	24797.1	22260.6	171.6	3328.8	2485.6	2181.1	2346.1	2264.4
1772	1	A0A0H3BXC6	Signal recognition particle receptor FtsY OS=Streptococcus pyogenes serotype M49 (strain NZ131) OX=471876 GN=ftsY PE=3	GFSARLNSFFANFRR	S	232	M P	yes	749.764	14676.1	10175	9226.3	9605.02	7695.01	101.4	2489.5	1674.5	1518.6	1617.5	1270.2
1463	1	A0A0H3C0D5	Dihydrolipoamide acetyltransferase component of pyruvate dehydrogenase complex OS=Streptococcus pyogenes serotype M49 (strain NZ131) OX=471876 GN=acoC PE=3	GIDLATVSGTGFNGK	S	196	M P	yes	1005.2	13951.4	9032.57	6800.76	7598.05	6141.79	92.2	1141.8	754.4	542.1	605	500.6
1666	1	A0A0H3BZ60	Histidine kinase OS=Streptococcus pyogenes serotype M49 (strain NZ131) OX=471876 GN=Spy49_1240c PE=4	GIEQNDISIVRLTYE	S	278	M	yes	2985.62	15822.2	10438.7	8036.66	9151.63	8139.13	1117.8	5439.6	3769.6	2983.6	3380	2937
2942	2	A0A0H3C2K4	Alkyl hydroperoxide reductase C OS=Streptococcus pyogenes serotype M49 (strain NZ131) OX=471876 GN=ahpC PE=3	GKEIAEFSAQAYHDG	S	12	M P	yes	2023.52	13951.7	14117.2	7841.5	13425.3	10550	49.6	238.6	264.6	140.3	238	190.7
457	2	A0A0H3BYJ6	CsbD domain-containing protein OS=Streptococcus pyogenes serotype M49 (strain NZ131) OX=471876 GN=Spy49_1002c PE=3	GKISGDKSLETEGKV	S	29	M L	yes	12551.7	49439.1	53965.8	31788	49174.5	43038.2	12551.7	49439.1	53965.8	31788	49174.5	43038.2
308	3	A0A0H3BYE4	Signal recognition particle protein OS=Streptococcus pyogenes serotype M49 (strain NZ131) OX=471876 GN=ffh PE=3	GKKKLSESDVQEVTK	S	26	M P L	yes	8590	59648	63572	42807.6	58650.5	50957.7	622.5	4627.9	5232.5	3342	4510.6	4061.5
1038	1	B5XIF1	Phosphoglycerate kinase OS=Streptococcus pyogenes serotype M49 (strain NZ131) OX=471876 GN=pgk PE=3	GLDIGPKSIAEFDQA	S	303	M P	yes	1125.98	19877.2	14861.1	13039.8	14207.4	11771.8	14.9	354.5	269.8	231.5	251.8	212.3
339	3	B5XIW7	Chaperonin GroEL OS=Streptococcus pyogenes serotype M49 (strain NZ131) OX=471876 GN=groEL PE=3	GLELKDATMTALGQA	T	311	M P L	yes	6232.31	71289.8	59337.9	47362.7	52401	45135.1	43.5	491.1	434.1	347.5	371.3	328.8
218	7	B5XJR1	Elongation factor G OS=Streptococcus pyogenes serotype M49 (strain NZ131) OX=471876 GN=fusA PE=3	GMEAHGNSQIVRAYV	S	638	M P L	yes	20620.9	158382	194222	110980	174877	151471	228.6	1913.3	2399	1302.5	2043	1776.2
2057	6	A0A0H3C1S1	Chaperone protein DnaJ OS=Streptococcus pyogenes serotype M49 (strain NZ131) OX=471876 GN=dnaJ PE=3	GMMRRQVTCDICHGS	T	189	M P	yes	7947.38	40197.3	51190.8	21861.7	50057.9	42490.7	581.1	2897	3598.6	1571.1	3554.1	3083.9
1373	1	A0A0H3C276	Galactose-6-phosphate isomerase subunit LacA OS=Streptococcus pyogenes serotype M49 (strain NZ131) OX=471876 GN=lacA2 PE=3	GMVAAEVSDERSAYM	S	85	M P	yes	1224.79	9146.39	10048	7713.59	9183.05	7797.05	144	465.1	503.4	392.2	456.7	380.7
969	1	B5XKM7	Enolase OS=Streptococcus pyogenes serotype M49 (strain NZ131) OX=471876 GN=eno PE=3	GMVPSGASTGEHEAV	S	42	M P L	yes	3661.49	26427.9	27136.6	15917.8	26674	22734.2	22	171.7	177.7	101.3	169.7	145.6
1135	2	B5XJ61	30S ribosomal protein S11 OS=Streptococcus pyogenes serotype M49 (strain NZ131) OX=471876 GN=rpsK PE=3	GPGSGRESAIRALAA	S	93	M P L	yes	874.832	3584.88	28306	16368.5	26818.8	22495.4	16.6	86.3	677.3	387.6	621.8	532.9
1267	1	A0A0H3BZY3	3-oxoacyl-[acyl-carrier-protein] synthase 2 OS=Streptococcus pyogenes serotype M49 (strain NZ131) OX=471876 GN=fabF PE=3	GPITKFDTTDYAVKN	T	43	M P	yes	16605.5	14029.5	12106.8	10926.8	12723.6	10610.9	534.1	546.8	456.1	412.5	492.4	416.9
4710	1	A0A0H3BY93	Putative pore-forming peptide OS=Streptococcus pyogenes serotype M49 (strain NZ131) OX=471876 GN=Spy49_0625 PE=4	GPRKLLISAITKIEV	S	90	M	yes	23.3909	3228.05	2314.38	2017.65	1884.8	1510.2	42	5577.2	3876.3	3399.4	3346.7	2888
3440	1	A0A0H3BYN9	Putative esterase OS=Streptococcus pyogenes serotype M49 (strain NZ131) OX=471876 GN=Spy49_1033c PE=4	GQKRSFSSWLVEKMF	S	29	M	yes	53.7846	7061.04	4690.54	4472.79	5241.75	3390.64	35.6	3586.4	2360.4	2279.6	2556.5	1741.2
3471	1	B5XLJ2	Serine hydroxymethyltransferase OS=Streptococcus pyogenes serotype M49 (strain NZ131) OX=471876 GN=glyA PE=3	GSVLTNKYAEGYPGN	Y	55	M	yes	4140.72	6249.01	5372.8	4652.18	5535.35	4372.47	2442	4217.7	4059.2	3296.9	3947.3	3130.8
976	2	A0A0H3BWQ8	Ribulose-phosphate 3-epimerase OS=Streptococcus pyogenes serotype M49 (strain NZ131) OX=471876 GN=rpe PE=3	GSYLFKASDLVSQVQ	S	205	M	yes	1005.37	20899.1	15435.5	12704	13720.5	12331.6	1317.6	11188.8	8728.3	7220.1	7602.6	6735.2
4132	3	A0A0H3C114	Inosine-5'-monophosphate dehydrogenase OS=Streptococcus pyogenes serotype M49 (strain NZ131) OX=471876 GN=guaB PE=3	GVIHKNMSITEQAEE	S	79	M P	yes	1053.39	9448.45	11424.7	6551.08	11707.1	9477.53	36.9	398.9	484.3	276.7	476.2	394.4
3532	1	B5XIW7	Chaperonin GroEL OS=Streptococcus pyogenes serotype M49 (strain NZ131) OX=471876 GN=groEL PE=3	GVITIEESRGMETEL	S	178	P	yes	2636.2	4732.33	4920.9	3502.79	4445.54	3884.81	18.4	32.6	36	25.7	31.5	28.3
311	2	A0A0H3BZJ0	Formate acetyltransferase OS=Streptococcus pyogenes serotype M49 (strain NZ131) OX=471876 GN=pfl PE=3	GWLQNLNSLAKLEFS	S	662	M P L	yes	1206.72	75855	48236.6	43372	49181	36676.2	51.9	993.2	636.6	560.2	628.3	481.3
7781	2	A0A0H3BYY9	Superoxide dismutase OS=Streptococcus pyogenes serotype M49 (strain NZ131) OX=471876 GN=sodM PE=3	HHDKHHATYVANTNA	T	34	P	yes	470.456	3864.56	5045.06	1609.44	5183.52	3893.39	44.5	386.9	531.1	172.5	590.2	433.2
4532	1	B5XKM5	Septation ring formation regulator EzrA OS=Streptococcus pyogenes serotype M49 (strain NZ131) OX=471876 GN=ezrA PE=3	HIQERIDSLYEVFER	S	296	M P	yes	71.833	5557.65	3403.35	3245.64	3607.63	2753.95	6.4	532.1	332.5	313.9	344.7	273.9
7467	2	B5XHV3	Translation initiation factor IF-2 OS=Streptococcus pyogenes serotype M49 (strain NZ131) OX=471876 GN=infB PE=3	HREAALKSIEEAETK	S	273	P	yes	1060.52	7198.07	7726.06	3529.39	6498.48	5656.71	96.4	671.7	719.2	320.2	591.7	521.3
1783	1	A0A0H3C0F1	Teichoic acid D-alanyltransferase OS=Streptococcus pyogenes serotype M49 (strain NZ131) OX=471876 GN=dltB PE=3	HRKKKGLSPLFQSRA	S	377	M	yes	667.747	11629.3	9311.68	8041.08	8898.46	7372.32	613.1	9637.3	7650.4	6628.4	7613.1	6078.3
3853	1	A0A0H3C002	Uncharacterized protein OS=Streptococcus pyogenes serotype M49 (strain NZ131) OX=471876 GN=Spy49_1390c PE=4	HRLMDSDTIETPRSY	T	308	P L	yes	10358.8	6825.74	5441.08	4257.85	5291.24	4816.64	4170.1	2847.7	2147.1	1678.1	2032.1	1870.3
1583	2	B5XJR1	Elongation factor G OS=Streptococcus pyogenes serotype M49 (strain NZ131) OX=471876 GN=fusA PE=3	HYEDVPKSVQEEIIK	S	680	M P	yes	2796.36	10513	9326.54	8060.41	8705.33	7683.56	31	127	115.2	94.6	101.7	90.1
696	1	A0A0H3BYE4	Signal recognition particle protein OS=Streptococcus pyogenes serotype M49 (strain NZ131) OX=471876 GN=ffh PE=3	IAAGSGNSFVEVNKF	S	409	M P L	yes	7156.26	22713.9	23593	15113.3	21502.8	17548.8	518.6	1762.3	1941.9	1179.9	1653.7	1398.7
3736	1	A0A0H3BYR8	Ribosomal_L12_N domain-containing protein OS=Streptococcus pyogenes serotype M49 (strain NZ131) OX=471876 GN=Spy49_0847 PE=3	IAEIKEASILELNDL	S	16	P	yes	568.866	6200.69	4392.11	3870.1	3318.03	3284.5	11.2	148.9	105.4	90.9	81.5	82.6
1008	1	A0A0H3BYQ3	30S ribosomal protein S3 OS=Streptococcus pyogenes serotype M49 (strain NZ131) OX=471876 GN=rpsC PE=3	IARAEGYSEGTVPLH	S	159	M P L	yes	1590.5	15652.8	14735.2	9682.33	13873.1	11356.4	28.2	305.8	292	181.1	266.8	213.1
4346	2	B5XJU2	Probable transcriptional regulatory protein Spy49_0265 OS=Streptococcus pyogenes serotype M49 (strain NZ131) OX=471876 GN=Spy49_0265 PE=3	IDKAKGNTDETFVEG	T	75	M P	yes	2096.43	6889.27	5782.91	5052.11	5466.65	5035.01	137.6	457.9	373.2	332.2	352	336.3
1183	1	A0A0H3BYB9	Tagatose-6-phosphate kinase OS=Streptococcus pyogenes serotype M49 (strain NZ131) OX=471876 GN=fruK PE=3	IDQINLGSVNRMASD	S	24	M P	yes	1825.32	12282.9	11510.3	8904.4	10591.3	9627.17	276.2	2146.2	1855.9	1482.6	1781	1636.7
737	2	A0A0H3BY55	Non-specific serine/threonine protein kinase OS=Streptococcus pyogenes serotype M49 (strain NZ131) OX=471876 GN=Spy49_1257c PE=4	IFEDVESTKPLPKVA	T	291	P L	yes	177379	16308.9	12368.3	6834.7	12584.8	10453.8	23989.1	2305.7	1847.8	955	1793.5	1458.1
2242	7	A0A0H3BZX9	PTS system, mannose-specific IIC component OS=Streptococcus pyogenes serotype M49 (strain NZ131) OX=471876 GN=manM PE=4	IGDILEDY-------	Y	269	M P	yes	18148.7	39472.3	47622.6	40726.3	39819.9	42055.1	2561.9	5532.5	6792.9	5485.3	5455.1	5649.1
640	1	A0A0H3BY81	Putative L-malate permease OS=Streptococcus pyogenes serotype M49 (strain NZ131) OX=471876 GN=malP PE=3	IGHSEDMSDALKDNS	S	257	M L	yes	3055.5	38422.4	40936	25855.2	39101.6	31931.1	2943.8	11641.2	12245.2	7644.8	11749.1	9808.2
936	1	A0A0H3C114	Inosine-5'-monophosphate dehydrogenase OS=Streptococcus pyogenes serotype M49 (strain NZ131) OX=471876 GN=guaB PE=3	IGPGSICTTRVVAGV	T	311	M P L	yes	2669.15	20943.4	18390.9	14354.6	16621.5	14403.7	93.5	884.2	779.6	606.3	676.1	599.4
1902	3	A0A0H3C114	Inosine-5'-monophosphate dehydrogenase OS=Streptococcus pyogenes serotype M49 (strain NZ131) OX=471876 GN=guaB PE=3	IHKNMSITEQAEEVR	T	81	M P	yes	2295.18	16957	17544	9799.4	15874.2	12803.3	80.4	715.9	743.7	413.9	645.7	532.8
980	2	A0A0H3BYE2	Putative glutamyl-aminopeptidase OS=Streptococcus pyogenes serotype M49 (strain NZ131) OX=471876 GN=pepA PE=3	IIKKLDRSTVDLIKR	S	347	M	yes	1187.26	16634.2	14948.6	13120.1	13638.2	11811	459.4	6636.7	6112.4	5034.7	5467.1	4396.7
2119	2	A0A0H3BXP9	Putative rhamnosyltransferase OS=Streptococcus pyogenes serotype M49 (strain NZ131) OX=471876 GN=rgpAc PE=4	IKEFMASSTKRDLVI	S	236	M L	yes	1054.44	2038.21	13355.7	8544.99	14102.9	11619.8	1102.5	2563.5	17007	10237	18064.4	13787.8
1850	2	A0A0H3BY55	Non-specific serine/threonine protein kinase OS=Streptococcus pyogenes serotype M49 (strain NZ131) OX=471876 GN=Spy49_1257c PE=4	IKVLRTNYQTDQVAV	Y	48	M P	yes	6515	10431.7	11442.6	8223.83	11114.1	9998.54	881.1	1474.8	1709.5	1149.1	1583.9	1394.6
1198	1	B5XJR1	Elongation factor G OS=Streptococcus pyogenes serotype M49 (strain NZ131) OX=471876 GN=fusA PE=3	ILQMHANSRQEIETV	S	361	M P L	yes	15091.3	28550.6	31630.9	20261.8	31226.2	28542.6	167.3	344.9	390.7	237.8	364.8	334.7
1455	1	B5XJR0	30S ribosomal protein S7 OS=Streptococcus pyogenes serotype M49 (strain NZ131) OX=471876 GN=rpsG PE=3	IMDAANNTGASVKKR	T	131	M P L	yes	1221.55	10410.6	10959.6	8940.27	10650.1	9276.82	39.5	413.3	430.8	335.8	396.9	353.1
875	2	B5XL08	Phosphopentomutase OS=Streptococcus pyogenes serotype M49 (strain NZ131) OX=471876 GN=deoB PE=3	INDIFNGSGITNDMG	S	257	P	yes	1768.16	49214.2	41141.1	24549.9	37069.3	32060.4	157	1766.6	1531.9	885	1347.3	1201.9
330	2	A0A0H3BY55	Non-specific serine/threonine protein kinase OS=Streptococcus pyogenes serotype M49 (strain NZ131) OX=471876 GN=Spy49_1257c PE=4	IQNHAPLSNNEVVRI	S	109	M P L	yes	11085.3	51215.6	71337.2	33205.9	63207.5	51382.8	1499.2	7240.7	10657.6	4639.8	9007.9	7166.9
1233	1	A0A0H3BWH3	Putative calcium-transporting ATPase OS=Streptococcus pyogenes serotype M49 (strain NZ131) OX=471876 GN=pacL PE=4	IRRDGHVTEIDSKEL	T	134	M L	yes	3050.88	20936.6	22295.8	15208.1	21951.8	17349.6	391.6	3506.6	3517.8	2322.4	3418.7	2720.6
113	6	B5XJ60	30S ribosomal protein S13 OS=Streptococcus pyogenes serotype M49 (strain NZ131) OX=471876 GN=rpsM PE=3	IRVKDLTSDQEDAIR	S	50	M P L	yes	25245.4	171324	199290	139626	185787	156820	789.1	6855.3	7614.9	5366.1	7160.3	5925.2
1580	1	A0A0H3BZC7	EIIAB-Man OS=Streptococcus pyogenes serotype M49 (strain NZ131) OX=471876 GN=manL PE=4	ISKLIEASKDPRFGN	S	236	M P L	yes	3428.88	13016.5	14246.2	9084.93	13805.2	10947	114.3	484.5	489.5	303.9	455.1	370.6
89	1	A0A0H3C0R9	Phosphopantothenoylcysteine synthetase OS=Streptococcus pyogenes serotype M49 (strain NZ131) OX=471876 GN=dpfB PE=4	ISNNEVASADTKEAI	S	211	M L	yes	17212.8	129423	154122	100558	141652	126557	7518.1	52683.8	62896.6	39286.1	54126.9	51770
1866	2	B5XHV3	Translation initiation factor IF-2 OS=Streptococcus pyogenes serotype M49 (strain NZ131) OX=471876 GN=infB PE=3	ISSFSKASKPDVTAS	S	54	M P	yes	6520.42	10466.5	18303.2	6873.6	17001.3	14587.2	592.7	976.7	1703.8	623.6	1548	1344.3
4129	1	A0A0H3BZ76	Putative phosphoprotein phosphatase (PppL protein) OS=Streptococcus pyogenes serotype M49 (strain NZ131) OX=471876 GN=pppL PE=4	ITEEEAASHPQRNII	S	155	M P L	yes	1301.5	5756.58	5689.39	2648.94	4324.17	3673.7	94	589.2	588.7	283.2	454.2	389.4
127	1	B5XMC3	Arginine deiminase OS=Streptococcus pyogenes serotype M49 (strain NZ131) OX=471876 GN=arcA PE=3	ITNAILESKGLKLIK	S	379	M P L	yes	5939.56	87008.9	70890.2	57296.4	65426.5	63202.2	176.2	725.9	626.4	470.9	540.9	524
302	2	B5XK64	Ribosome-recycling factor OS=Streptococcus pyogenes serotype M49 (strain NZ131) OX=471876 GN=frr PE=3	ITPANDGSVIRLVIP	S	96	M P L	yes	6988.78	123758	89095.2	74421.1	83243	69005.5	419.4	9068.7	6262.3	5496.6	5909.2	5146.4
558	2	A0A0H3BVE1	30S ribosomal protein S5 OS=Streptococcus pyogenes serotype M49 (strain NZ131) OX=471876 GN=rpsE PE=3	ITSKSLGSNTPINIV	S	129	M P L	yes	16643.3	40243.4	32464.2	25114.2	29057.1	23187	211.9	617.7	503.4	364.5	417.7	346.1
1558	2	A0A0H3BXI0	Uncharacterized protein OS=Streptococcus pyogenes serotype M49 (strain NZ131) OX=471876 GN=Spy49_1001c PE=3	IVSQNVDSMTHLKVV	S	96	P	yes	813.971	16567.7	15297.4	9411.52	14164.7	11504.3	29.9	510.3	459.5	278	427.4	360.8
688	1	B5XJ55	50S ribosomal protein L15 OS=Streptococcus pyogenes serotype M49 (strain NZ131) OX=471876 GN=rplO PE=3	KAAKFSKSAEAAIIA	S	131	M P	yes	470.013	10598.8	10204.8	7837.82	9074.16	7604.44	12.4	379.9	377	282.3	313.3	268
555	1	B5XHX4	Serine--tRNA ligase OS=Streptococcus pyogenes serotype M49 (strain NZ131) OX=471876 GN=serS PE=3	KAERNIASAAIAQAK	S	56	M P L	yes	1989.81	21043.1	17487.7	13883.7	16315.1	12387.7	200.6	2094.9	1707.8	1328.4	1543.6	1260.1
1532	1	B5XLR6	30S ribosomal protein S20 OS=Streptococcus pyogenes serotype M49 (strain NZ131) OX=471876 GN=rpsT PE=3	KAFEANPSEELFRAA	S	40	M P	yes	923.8	17916.1	14032.7	9033.1	10938.6	6481.2	923.8	17916.1	14032.7	9033.1	10938.6	6481.2
119	1	B5XIW7	Chaperonin GroEL OS=Streptococcus pyogenes serotype M49 (strain NZ131) OX=471876 GN=groEL PE=3	KAIAQPVSGKEAIAQ	S	138	M P	yes	2263.69	41705.5	38724.8	39662	41209.5	38463.7	15.8	287.3	283.3	291	292	280.2
692	2	B5XJR1	Elongation factor G OS=Streptococcus pyogenes serotype M49 (strain NZ131) OX=471876 GN=fusA PE=3	KAKLYDGSYHDVDSS	S	569	P L	yes	3698.41	50429.2	60533.5	30631.3	56802.9	47184.4	41	609.2	747.7	359.5	663.6	553.3
1035	1	A0A0H3BZC7	EIIAB-Man OS=Streptococcus pyogenes serotype M49 (strain NZ131) OX=471876 GN=manL PE=4	KANVVPISKLIEASK	S	230	M	yes	389.986	7068.4	6586.12	4585.81	5760.51	4235.85	13	263.1	226.3	153.4	189.9	143.4
2181	1	A0A0H3BX27	Dihydrolipoyl dehydrogenase OS=Streptococcus pyogenes serotype M49 (strain NZ131) OX=471876 GN=acoL PE=3	KAPAQAASAAPKAAL	S	118	M P L	yes	2666.49	9629.47	8375.7	5947.93	6723.42	5058.8	168.1	598.6	544.6	386	427.7	323.1
950	1	B5XLI1	GMP reductase OS=Streptococcus pyogenes serotype M49 (strain NZ131) OX=471876 GN=guaC PE=3	KCIITSRSQADTSVT	S	26	M L	yes	2896.31	17796.4	17051.8	14178.5	16624.3	14785.9	1783.1	19978	22082.5	19224.3	22830.1	18368
1126	1	A0A0H3C1P7	Transcription termination/antitermination protein NusA OS=Streptococcus pyogenes serotype M49 (strain NZ131) OX=471876 GN=nusA PE=3	KDALAISSAYELGDK	S	85	M P	yes	3475.54	21569.7	16386.8	12260.7	15824.5	11848.3	470.6	3124	2271.8	1694.5	2181.5	1644
1197	2	A0A0H3BYG7	Putative toxic anion resistance protein OS=Streptococcus pyogenes serotype M49 (strain NZ131) OX=471876 GN=Spy49_0138c PE=3	KDLKTKDSATPDYQI	S	222	M P L	yes	4158.73	23969.3	29883.4	15890.8	28227.4	23085.7	804.9	4663.3	5604.6	3161.2	5426.4	4607.9
676	4	A0A0H3BWH3	Putative calcium-transporting ATPase OS=Streptococcus pyogenes serotype M49 (strain NZ131) OX=471876 GN=pacL PE=4	KDLSTAVSKDAGIGD	S	190	M L	yes	9169.76	60828.1	65111.6	42274.8	59579.5	50190.6	1177	10187.9	10273.2	6455.7	9278.7	7870.4
1062	2	A0A0H3BX54	Xaa-His dipeptidase OS=Streptococcus pyogenes serotype M49 (strain NZ131) OX=471876 GN=Spy49_0844 PE=4	KELGLPVSKKVRFIV	S	142	M	yes	1074.69	17025.7	16458	13803.9	16120.3	12875.2	69.3	895.2	928.9	760.5	891.1	735.1
1742	1	A0A0H3BZK3	Glucokinase OS=Streptococcus pyogenes serotype M49 (strain NZ131) OX=471876 GN=Spy49_1181c PE=3	KETQEVGSVVEKELG	S	99	M P	yes	914.591	9846.06	9017.48	7531.49	8123	6736.83	138.8	1337.3	1207	1028.6	1068.3	997.8
1685	2	A0A0H3BZD6	Putative PTS system enzyme II OS=Streptococcus pyogenes serotype M49 (strain NZ131) OX=471876 GN=Spy49_1737c PE=4	KFEQDAKSLLTAIGG	S	10	M	yes	550.833	9791.06	8076.24	6611.95	6924.63	5706.35	112	1032.1	823.9	681.4	700.1	587
9107	1	A0A0H3C1K3	Thioredoxin reductase OS=Streptococcus pyogenes serotype M49 (strain NZ131) OX=471876 GN=nox2 PE=3	KFNVENIYGIVQKIE	Y	76	M	yes	95.3394	1546.97	1197.61	950.246	989.68	1065.59	19.1	338.4	272.7	215.7	222.3	246
1082	2	A0A0H3BXY9	Isoleucine--tRNA ligase OS=Streptococcus pyogenes serotype M49 (strain NZ131) OX=471876 GN=ileS PE=3	KGEKMSKSKGNIISP	S	584	M	yes	3412.56	18325.7	22327	10206.6	21052	17315.6	397.4	2270.9	2856.2	1229.7	2548.2	2153.3
771	4	B5XKI1	Elongation factor Tu OS=Streptococcus pyogenes serotype M49 (strain NZ131) OX=471876 GN=tuf PE=3	KGEVYILSKDEGGRH	S	317	M P L	yes	5232.47	74026.5	83577.1	38518	74948.6	62043.4	37	471.1	525.9	238.8	464.2	401.7
1856	1	A0A0H3BYT6	Non-phosphorylating glyceraldehyde-3-phosphate dehydrogenase (NADP) OS=Streptococcus pyogenes serotype M49 (strain NZ131) OX=471876 GN=gapN PE=4	KGHKAAVSEVIRTAE	S	99	M	yes	1286.18	7099.32	6634.76	5553.61	6402.16	5328.77	41.1	193.5	186.7	154	184.1	147.9
34461	2	A0A0H3C228	L-serine dehydratase OS=Streptococcus pyogenes serotype M49 (strain NZ131) OX=471876 GN=sdhA PE=3	KGNSLSDTTILNAVR	T	88	M P	yes	4482.09	6961.12	4483.96	4220.66	4529.26	3820.35	1294.2	1006.9	636.9	586.5	644.6	546.8
4396	1	B5XJR1	Elongation factor G OS=Streptococcus pyogenes serotype M49 (strain NZ131) OX=471876 GN=fusA PE=3	KIGADFLYSVQTLHD	Y	146	M P	yes	189.431	6572.68	4031.79	2794.73	3492.4	3504.93	2.1	79.4	49.8	32.8	40.8	41.1
641	2	B5XL08	Phosphopentomutase OS=Streptococcus pyogenes serotype M49 (strain NZ131) OX=471876 GN=deoB PE=3	KIGLGNISRPIPLKT	S	62	M P L	yes	1889.8	46278	30116.6	22480.5	26215.1	22169.4	167.8	1661.2	1121.4	810.4	952.8	831.1
3200	2	B5XLJ8	L-lactate dehydrogenase OS=Streptococcus pyogenes serotype M49 (strain NZ131) OX=471876 GN=ldh PE=3	KIYAADYSDCHDADL	S	70	P	yes	507.838	16347.9	11461	6148.01	9173.29	8916.12	5.9	231	158.4	84	125.9	125.8
725	3	A0A0H3C2S7	Uncharacterized protein OS=Streptococcus pyogenes serotype M49 (strain NZ131) OX=471876 GN=Spy49_1801c PE=4	KKDSDIKSVTEIVEE	S	87	M P L	yes	1962.29	31600.3	45650.9	17380.9	37519	30078.7	507.6	8963.9	12533.2	4643.2	9647.8	8043.6
2352	4	B5XJ47	50S ribosomal protein L24 OS=Streptococcus pyogenes serotype M49 (strain NZ131) OX=471876 GN=rplX PE=3	KKHQKPNTENPQGAI	T	49	P L	yes	1964.27	10752.3	22572.1	5292.96	20162.4	16875.1	52.4	405.8	848.5	191	699.9	609.2
3892	1	B5XHV3	Translation initiation factor IF-2 OS=Streptococcus pyogenes serotype M49 (strain NZ131) OX=471876 GN=infB PE=3	KKIISSFSKASKPDV	S	51	M	yes	995.61	3487.05	2993.96	2562.72	2643.54	2080.17	90.5	325.4	278.7	232.5	240.7	191.7
1429	2	A0A0H3BZL9	PTS system, fructose-specific IIABC component OS=Streptococcus pyogenes serotype M49 (strain NZ131) OX=471876 GN=fruA PE=4	KKSQELISLILNNEG	S	257	M P L	yes	1124.93	30198.3	11325.6	14076.2	17793.9	18652.2	36.5	1195.1	427.7	519.5	673.1	695.4
55	3	A0A0H3BY05	Carbamate kinase OS=Streptococcus pyogenes serotype M49 (strain NZ131) OX=471876 GN=arcC PE=3	KLEEVTVSQMKEYIT	S	258	M P L	yes	18605.5	202433	202250	150737	189188	162996	940.6	2267.4	2306.7	1758.6	2062.5	1879.6
1484	1	B5XJU2	Probable transcriptional regulatory protein Spy49_0265 OS=Streptococcus pyogenes serotype M49 (strain NZ131) OX=471876 GN=Spy49_0265 PE=3	KLIDALESDDDVQKV	S	224	M P	yes	760.262	12009.2	11736.3	8695.95	10515.5	9522.05	49.9	798.2	757.4	571.8	677.1	636
190	2	B5XHZ0	Chaperone protein DnaK OS=Streptococcus pyogenes serotype M49 (strain NZ131) OX=471876 GN=dnaK PE=3	KLIDRNTTIPTSKSQ	T	387	M L	yes	15407.4	92966.2	87812.9	83355.8	90933.7	81769.8	144.7	876.4	868.5	799	848	816.8
400	1	B5XHX4	Serine--tRNA ligase OS=Streptococcus pyogenes serotype M49 (strain NZ131) OX=471876 GN=serS PE=3	KLKKRGVSEDTLTHL	S	24	M P	yes	3287.26	34613.8	28761.8	17667.1	27001.9	18938.8	331.4	3445.9	2808.8	1690.4	2554.7	1926.5
6	4	A0A0H3BZD6	Putative PTS system enzyme II OS=Streptococcus pyogenes serotype M49 (strain NZ131) OX=471876 GN=Spy49_1737c PE=4	KLPETPVSDAPVATA	S	507	M L	yes	61200.5	642304	1.03677e+06	370473	892917	776986	12443.8	67706.9	105766	38179.4	90276.5	79926.9
351	2	A0A0H3C114	Inosine-5'-monophosphate dehydrogenase OS=Streptococcus pyogenes serotype M49 (strain NZ131) OX=471876 GN=guaB PE=3	KLPLVDNSGRLSGLI	S	194	P L	yes	10282.7	43215.6	39301.2	32852.5	34826.3	30907.7	360.2	1824.5	1666	1387.6	1416.6	1286.2
1302	2	A0A0H3C129	3-oxoacyl-[acyl-carrier-protein] reductase OS=Streptococcus pyogenes serotype M49 (strain NZ131) OX=471876 GN=fabG PE=3	KMQEQILSQIPMKRI	S	204	P	yes	2607.24	29128.4	20932.8	17536.9	20647.4	15986.3	127.2	1739.1	1261.2	988.4	1181.9	937.9
262	2	A0A0H3BZ03	R3H domain protein OS=Streptococcus pyogenes serotype M49 (strain NZ131) OX=471876 GN=Spy49_0209 PE=4	KNAPAVNSADVEPEE	S	84	M P L	yes	8574.18	67301.2	76479	49943.8	68476	59769.9	760.2	7853.5	9245	5901	7710.4	7367.3
2741	2	B5XI61	Xaa-Pro dipeptidyl-peptidase OS=Streptococcus pyogenes serotype M49 (strain NZ131) OX=471876 GN=pepX PE=3	KNDMDALSFFQSEQE	S	68	M P	yes	532.337	13146.9	8033.83	7267.86	7496.13	6131.13	264.6	8328.4	4029.4	4027.1	4267.9	3311.3
844	2	A0A0H3C1S1	Chaperone protein DnaJ OS=Streptococcus pyogenes serotype M49 (strain NZ131) OX=471876 GN=dnaJ PE=3	KPGTAPVTCRKCHGS	T	163	M P	yes	1725.97	24368.2	31897.2	14090.2	31202.9	25153.6	126.2	1756.2	2242.3	1012.6	2215.4	1825.6
418	2	A0A0H3BY55	Non-specific serine/threonine protein kinase OS=Streptococcus pyogenes serotype M49 (strain NZ131) OX=471876 GN=Spy49_1257c PE=4	KPLPKVASGPTASVK	S	299	M P L	yes	19023.7	34261.6	31319.1	28237	31067.3	28202.5	2572.8	4843.8	4679	3945.5	4427.5	3933.7
1553	2	A0A0H3BXC6	Signal recognition particle receptor FtsY OS=Streptococcus pyogenes serotype M49 (strain NZ131) OX=471876 GN=ftsY PE=3	KQAQADASNDSAKEE	S	134	M P L	yes	1241.47	13231.8	21501.4	9830.81	20828.8	17990.2	167.9	2244.5	3538.5	1618.1	3507.6	2969.6
1150	1	A0A0H3BX54	Xaa-His dipeptidase OS=Streptococcus pyogenes serotype M49 (strain NZ131) OX=471876 GN=Spy49_0844 PE=4	KQTGLKGYEQVIGGG	Y	411	M P L	yes	1856.28	14775.8	14314.2	9879.64	12250.8	10666.6	119.7	776.9	807.9	544.3	677.2	609
902	2	B5XJD9	Acetate kinase OS=Streptococcus pyogenes serotype M49 (strain NZ131) OX=471876 GN=ackA PE=3	KSGLSGVSGISSDMR	S	278	M P	yes	14516.6	35484.4	40212	31821.9	31664.4	32266.9	599.5	999.2	1047.2	780.8	798.6	818.7
2108	5	A0A0H3C1S0	CsbD domain-containing protein OS=Streptococcus pyogenes serotype M49 (strain NZ131) OX=471876 GN=Spy49_1665c PE=3	KSKIEQASGGLKEGA	S	14	M P L	yes	11697.7	57943	67901.3	32841.6	57072.7	44136.5	10495.8	77536.9	89202.5	43189	81127	59395.6
472	1	A0A0H3BVI6	Putative V-type Na+-ATPase subunit E OS=Streptococcus pyogenes serotype M49 (strain NZ131) OX=471876 GN=ntpE PE=4	KTGQKFSSYDCAELR	S	132	M L	yes	5120.46	36717.9	32080.5	24248.6	29784.1	24778.1	26566.2	15114.5	13520.1	10103.2	12795.9	11046
6764	1	A0A0H3BZ11	Phosphoglucomutase OS=Streptococcus pyogenes serotype M49 (strain NZ131) OX=471876 GN=pgmA PE=3	KTISVTLSGVDGAAE	S	464	P	yes	22.4844	2470.73	1726.99	1563.67	1557.55	1942.76	1.9	208	144.6	128.1	130.1	157.6
4499	2	B5XKM5	Septation ring formation regulator EzrA OS=Streptococcus pyogenes serotype M49 (strain NZ131) OX=471876 GN=ezrA PE=3	KTLTNVESGQMDVFA	S	400	P	yes	263.762	5869.94	4334.79	3460.7	4047.2	4431.06	23.5	562	423.5	334.7	386.7	440.7
2559	2	B5XLV6	ATP-dependent 6-phosphofructokinase OS=Streptococcus pyogenes serotype M49 (strain NZ131) OX=471876 GN=pfkA PE=3	KVASTIQYDFEHKGK	Y	207	M P	yes	687.134	8345.5	9300.28	5316.17	8717.2	7964.26	17.4	276	312.5	171.6	280.7	261.1
150	4	A0A0H3BZL9	PTS system, fructose-specific IIABC component OS=Streptococcus pyogenes serotype M49 (strain NZ131) OX=471876 GN=fruA PE=4	KVETNGASGVANRLT	S	205	M P L	yes	25069.1	103644	106218	95428	105486	100385	813.4	4101.7	4011.2	3521.9	3990.3	3742.6
1243	1	B5XIW7	Chaperonin GroEL OS=Streptococcus pyogenes serotype M49 (strain NZ131) OX=471876 GN=groEL PE=3	KVGAPTETALKEMKL	T	385	P	yes	7464.45	18755.1	19041.2	14052.1	18191.4	16060.9	52.1	129.2	139.3	103.1	128.9	117
983	1	A0A0H3BYM9	Glyceraldehyde-3-phosphate dehydrogenase OS=Streptococcus pyogenes serotype M49 (strain NZ131) OX=471876 GN=plr PE=3	KVMEVDGSQLVKVVS	S	305	M	yes	2597.28	10813.3	8216.73	6908.59	7815.39	6470.15	21	86.8	68.3	58.3	59.4	53.2
2702	1	A0A0H3C1H3	Fructose-bisphosphate aldolase class II OS=Streptococcus pyogenes serotype M49 (strain NZ131) OX=471876 GN=fba PE=4	KVNVNTESQIAFSNA	S	235	M P	yes	483.873	8083.63	8051.82	4885.1	7082.68	5894.72	5	95.4	98.3	59.8	83	71.4
3039	1	A0A0H3C276	Galactose-6-phosphate isomerase subunit LacA OS=Streptococcus pyogenes serotype M49 (strain NZ131) OX=471876 GN=lacA2 PE=3	KYEVVDVSENEVRDF	S	33	P	yes	2166.35	7938.93	8133.85	5976.95	7164.27	7307.56	254.7	403.7	407.5	303.9	356.3	356.8
95	2	A0A0H3BZD9	Protein GrpE OS=Streptococcus pyogenes serotype M49 (strain NZ131) OX=471876 GN=grpE PE=3	LAKAILPSLDNLERA	S	99	M L	yes	4368.11	151449	115315	102804	102422	92407.9	308.8	9730.5	7762.9	6761.4	6717.9	6079.7
102	2	B5XKI1	Elongation factor Tu OS=Streptococcus pyogenes serotype M49 (strain NZ131) OX=471876 GN=tuf PE=3	LARRLPTSVNQPKDY	S	43	M	yes	16362.1	86283.1	77442.7	70551.7	74674.1	63232.7	115.7	549.1	487.3	437.4	462.5	409.4
667	1	A0A0H3BXU4	Putative ABC transporter OS=Streptococcus pyogenes serotype M49 (strain NZ131) OX=471876 GN=Spy49_0683 PE=4	LDAWSIESDVKTVLS	S	135	M L	yes	3187.11	29712.2	20826.3	17145.1	19396.5	15301.7	4006.8	31705	21738.3	17604.7	19846.4	16331.1
6819	1	B5XJ55	50S ribosomal protein L15 OS=Streptococcus pyogenes serotype M49 (strain NZ131) OX=471876 GN=rplO PE=3	LGFEGGQTPLFRRIP	T	55	P	yes	162.988	2485.8	1791.92	1443.74	1572.7	1163.37	4.3	89.1	66.2	52	54.3	41
1011	1	A0A0H3BY85	Rhamnosyltransferase OS=Streptococcus pyogenes serotype M49 (strain NZ131) OX=471876 GN=rgpBc PE=4	LIRDDGSTDGTQDII	T	41	M L	yes	1774.3	23969.5	26017.4	20793.2	23712.4	21915.5	1774.3	23969.5	26017.4	20793.2	23712.4	21915.5
4610	1	B5XJ48	50S ribosomal protein L5 OS=Streptococcus pyogenes serotype M49 (strain NZ131) OX=471876 GN=rplE PE=3	LITKAKKSIAGFRLR	S	74	M	yes	389.231	2747.02	2206.24	1817.36	2339.93	1691.83	4	36.5	29.7	23.7	30.3	22.2
5236	1	B5XKM7	Enolase OS=Streptococcus pyogenes serotype M49 (strain NZ131) OX=471876 GN=eno PE=3	LKERGLVTAVGDEGG	T	200	P	yes	2263.47	4340.51	2336.46	2152.75	2074.82	1795.63	13.6	28.2	15.3	13.7	13.2	11.5
967	2	A0A0H3BVE1	30S ribosomal protein S5 OS=Streptococcus pyogenes serotype M49 (strain NZ131) OX=471876 GN=rpsE PE=3	LKPAVEGSGVAAGGA	S	102	P	yes	761.87	11661.9	11259.9	6655.79	9342.53	8139.89	9.7	179	174.6	96.6	134.3	121.5
1625	2	A0A0H3BZC7	EIIAB-Man OS=Streptococcus pyogenes serotype M49 (strain NZ131) OX=471876 GN=manL PE=4	LLHGQVATAWTPASK	T	186	P	yes	8066.72	17000.7	16196.1	9966.82	14172.2	9706.42	268.9	632.8	556.5	333.4	467.2	328.6
2926	2	A0A0H3C0F2	Tagatose 1,6-diphosphate aldolase OS=Streptococcus pyogenes serotype M49 (strain NZ131) OX=471876 GN=lacD2 PE=3	LLLAYEKTGYDATTT	T	95	M P	yes	1748.61	11147.2	11650	9489.65	10791.7	9487.38	159.8	354.9	376.8	300.4	332	291.4
1466	2	A0A0H3BZ23	Cell division protein FtsZ OS=Streptococcus pyogenes serotype M49 (strain NZ131) OX=471876 GN=ftsZ PE=3	LMGIGIGSGEERIVE	S	233	M P L	yes	857.761	19235.4	14444.3	11462.3	14050.2	11839.8	32	730	555.8	422.7	532.7	449.8
1361	1	B5XJ35	30S ribosomal protein S10 OS=Streptococcus pyogenes serotype M49 (strain NZ131) OX=471876 GN=rpsJ PE=3	LMKLDLPSGVNVEIK	S	94	P	yes	297.841	9871.13	9524.67	8251.84	7940.46	10044.8	4.7	182.7	178.8	147.2	143.8	181.5
126	2	A0A0H3C049	Spi SpeB protease inhibitor OS=Streptococcus pyogenes serotype M49 (strain NZ131) OX=471876 GN=Spy49_1689c PE=4	LNHDNVRSMIEAYQK	S	88	M P	yes	534.493	68611.1	61023.1	51105.8	56303.3	48617.7	538.6	4711.4	4273.6	3275.8	3660.2	3420.2
452	2	A0A0H3BYW2	EIICB-Lac OS=Streptococcus pyogenes serotype M49 (strain NZ131) OX=471876 GN=lacE PE=4	LNKAAKEYGAPVTAA	Y	489	M P L	yes	3835.7	33189.4	49235.7	22942.9	45089.8	36309.2	1000.9	3866.5	5474.6	2431.5	5058.9	3977.6
2001	2	A0A0H3BZL9	PTS system, fructose-specific IIABC component OS=Streptococcus pyogenes serotype M49 (strain NZ131) OX=471876 GN=fruA PE=4	LNNEGNTYHAKNGKS	Y	267	M P L	yes	758.174	15254.6	10796	7323.94	9953.05	11222.4	24.6	603.7	407.7	270.3	376.5	418.4
20197	1	B5XKI1	Elongation factor Tu OS=Streptococcus pyogenes serotype M49 (strain NZ131) OX=471876 GN=tuf PE=3	LPVEDVFSITGRGTV	S	223	M P	yes	0	1508.5	921.748	483.894	1162.49	1204.73	0	9.6	5.8	3	7.2	7.8
498	1	A0A0H3BZQ5	SSU ribosomal protein S1p OS=Streptococcus pyogenes serotype M49 (strain NZ131) OX=471876 GN=rpsA PE=4	LRGFIPASMIDTRFV	S	136	M P L	yes	2576.67	30422.6	22123.9	21955	22504	18062.1	48.6	589.9	414.5	410.5	428.6	336
1877	2	B5XHV3	Translation initiation factor IF-2 OS=Streptococcus pyogenes serotype M49 (strain NZ131) OX=471876 GN=infB PE=3	LRNSRVATGEAGGIT	T	483	M P	yes	199.122	12151.1	11436.5	5024.03	10768.6	8276.18	18.1	1133.9	1064.6	455.8	980.5	762.7
3565	1	B5XLE2	50S ribosomal protein L10 OS=Streptococcus pyogenes serotype M49 (strain NZ131) OX=471876 GN=rplJ PE=3	LRRSLRESGVEFKVI	S	49	P	yes	2150.64	8026.16	7793.82	4812.74	7088.83	5720.59	35.9	169.8	157.3	98	142.6	117.7
5178	1	B5XJR1	Elongation factor G OS=Streptococcus pyogenes serotype M49 (strain NZ131) OX=471876 GN=fusA PE=3	LTFFRVYSGVLNSGS	S	331	P	yes	27.0616	4941.92	3610.8	3203.72	3714.96	2788.6	0.3	59.7	44.6	37.6	43.4	32.7
5846	1	A0A0H3C1C5	Putative peroxide resistance protein OS=Streptococcus pyogenes serotype M49 (strain NZ131) OX=471876 GN=Spy49_1183c PE=3	LVENIYASVTHNISK	S	12	P	yes	97.8124	6373.85	3236.41	1297.68	1847.28	1404.19	2.8	141.5	69.6	27.9	38	30.4
3051	1	B5XJ39	50S ribosomal protein L2 OS=Streptococcus pyogenes serotype M49 (strain NZ131) OX=471876 GN=rplB PE=3	LVRAAGASAQVLGQE	S	161	M P	yes	685.989	4773.04	4408.74	3682.84	3972.88	3530.92	9	81.4	75.9	59	63.3	56.6
1704	2	A0A0H3BZ23	Cell division protein FtsZ OS=Streptococcus pyogenes serotype M49 (strain NZ131) OX=471876 GN=ftsZ PE=3	----MAFSFDTASIQ	S	4	M P	yes	721.055	12534.6	8669.67	6228.74	7124	8159.92	26.9	475.7	333.6	229.7	270.1	310
849	2	B5XIW7	Chaperonin GroEL OS=Streptococcus pyogenes serotype M49 (strain NZ131) OX=471876 GN=groEL PE=3	MAKDIKFSADARAAM	S	8	M P	yes	8524.66	32661.8	30550.6	20158.1	28310.3	23665.7	59.5	225	223.5	147.9	200.6	172.4
829	2	A0A0H3BZJ0	Formate acetyltransferase OS=Streptococcus pyogenes serotype M49 (strain NZ131) OX=471876 GN=pfl PE=3	MATVKTNTDVFEKAW	T	8	M P L	yes	3122.59	26272.8	24171.4	22266.7	23068	19629.7	134.3	344	319	287.6	294.7	257.6
278	2	A0A0H3BXY9	Isoleucine--tRNA ligase OS=Streptococcus pyogenes serotype M49 (strain NZ131) OX=471876 GN=ileS PE=3	MCRQYALSQVDKQRN	S	115	M L	yes	5634.06	46662.9	43333.8	34579.9	40050.2	35466.7	656.1	5782.4	5543.5	4166.2	4847.8	4410.5
532	1	B5XJ02	UPF0297 protein Spy49_1751c OS=Streptococcus pyogenes serotype M49 (strain NZ131) OX=471876 GN=Spy49_1751c PE=3 M	----MGFTDETVRFK	T	4	M L	yes	35719.8	20904.3	17538	16086.1	16476.2	14650.4	5725.6	3892.9	3326.2	2843.6	3013.9	2814.2
1178	1	B5XJ02	UPF0297 protein Spy49_1751c OS=Streptococcus pyogenes serotype M49 (strain NZ131) OX=471876 GN=Spy49_1751c PE=3 M	-MGFTDETVRFKLDD	T	7	M	yes	26194.1	1076.65	275.233	604.162	574.553	501.327	4198.7	200.5	52.2	106.8	105.1	96.3
841	2	B5XL08	Phosphopentomutase OS=Streptococcus pyogenes serotype M49 (strain NZ131) OX=471876 GN=deoB PE=3	MGHNKSNSHGIDTLI	S	270	M P L	yes	3519.43	35658.4	36288.2	19376.4	31387.7	25343.7	312.5	1280	1351.2	698.5	1140.8	950.1
3088	1	A0A0H3BVU9	Response regulator CsrR OS=Streptococcus pyogenes serotype M49 (strain NZ131) OX=471876 GN=csrR PE=4	MMMTARDSIMDVVAG	S	84	M P	yes	1646.5	6799.01	5277.94	4967.62	4779.2	4684.39	116.5	560.6	448.1	404.4	394.2	373.6
11712	2	B5XKM2	50S ribosomal protein L19 OS=Streptococcus pyogenes serotype M49 (strain NZ131) OX=471876 GN=rplS PE=3	-MNPLIQSLTEGQLR	S	7	P	yes	1279.17	3452.13	1640.15	1234.57	1472.37	1355.63	35.3	107.5	48.7	35.9	43.6	41.6
455	2	B5XIG1	Trigger factor OS=Streptococcus pyogenes serotype M49 (strain NZ131) OX=471876 GN=tig PE=3	MPADQVRSLLSADML	S	400	M L	yes	2596.89	30840.5	26905.2	23512.2	26768.6	19031.3	73.8	1087.3	896.7	786.5	875	654.9
2113	1	B5XLE2	50S ribosomal protein L10 OS=Streptococcus pyogenes serotype M49 (strain NZ131) OX=471876 GN=rplJ PE=3	------MSEAIIAKK	S	2	M	yes	5187.9	5667.47	4880.43	5097.57	4623.15	4024.34	86.6	119.9	98.5	103.8	93	82.8
758	1	A0A0H3BZR7	Mid-cell-anchored protein Z OS=Streptococcus pyogenes serotype M49 (strain NZ131) OX=471876 GN=mapZ PE=3	------MSEESKEVE	S	2	M L	yes	26104.7	20520.6	26328	14604.2	24092.9	22427.9	5592.7	6347.4	8494.4	4626.4	7824.6	7556.1
6845	1	A0A0H3C2S7	Uncharacterized protein OS=Streptococcus pyogenes serotype M49 (strain NZ131) OX=471876 GN=Spy49_1801c PE=4	---MSEKSLGEVLRE	S	5	M	yes	45.6167	1690.37	1785.14	1796.04	1946.38	1380.61	11.8	479.5	490.1	479.8	500.5	369.2
573	1	A0A0H3BZW4	Streptolysin S export ATP-binding protein (SagG) OS=Streptococcus pyogenes serotype M49 (strain NZ131) OX=471876 GN=sagG PE=4	------MSFVQLTNV	S	2	M L	yes	2073.27	23805.4	19483.4	16673.9	18304	15127.5	1361.3	3824.8	3320.2	2728.3	3064.7	2473.3
196	1	B5XKM7	Enolase OS=Streptococcus pyogenes serotype M49 (strain NZ131) OX=471876 GN=eno PE=3	------MSIITDVYA	S	2	M P	yes	6207.89	31322.5	31534.6	18919.1	22933	18487.1	37.3	203.5	206.5	120.4	145.9	118.4
572	2	A0A0H3BY96	Phosphate acetyltransferase OS=Streptococcus pyogenes serotype M49 (strain NZ131) OX=471876 GN=pta PE=3	---MSIRSLFGGLRE	S	5	M L	yes	4553.51	48488.4	36545.4	30230.3	34698.4	28029.9	214.7	1497.2	1226.2	951.2	1068.3	935.6
193	2	B5XKG9	Lysine--tRNA ligase OS=Streptococcus pyogenes serotype M49 (strain NZ131) OX=471876 GN=lysS PE=3	------MSNQHIEEL	S	2	M P L	yes	44378.6	60187.5	95995.3	36822.6	80864.1	72565.4	1930.5	2948.7	4662.3	1724.5	3752.5	3342.5
1554	2	A0A0H3BVR1	Amino acid ABC transporter, ATP-binding protein OS=Streptococcus pyogenes serotype M49 (strain NZ131) OX=471876 GN=Spy49_0236c PE=4	------MSNSIIEIK	S	2	M	yes	2779.7	11452.1	10905.8	9876.18	10582.5	9018.22	1302.7	9207.7	8338	7494.8	8099.5	7318.9
597	2	B5XKU5	UPF0342 protein Spy49_0636 OS=Streptococcus pyogenes serotype M49 (strain NZ131) OX=471876 GN=Spy49_0636 PE=3	------MSQEIYDYA	S	2	M	yes	8867.76	33103	27654.3	22144.1	22362.9	22180.6	11856	30970.7	25774.6	17543.6	20649.7	22780.5
1565	2	B5XJ99	30S ribosomal protein S4 OS=Streptococcus pyogenes serotype M49 (strain NZ131) OX=471876 GN=rpsD PE=3	MSRYTGPSWKQSRRL	S	8	M	yes	791.563	12798.9	11493.2	10161.1	11806.2	9000.29	14.8	287.1	259.6	220.1	259.9	197
805	2	B5XKV2	50S ribosomal protein L21 OS=Streptococcus pyogenes serotype M49 (strain NZ131) OX=471876 GN=rplU PE=3	-----MSTYAIIKTG	T	3	M L	yes	1230.4	17784.5	14541.5	12448.5	13231.4	11570.6	34.9	651.1	493.9	430.6	457.6	400.7
189	2	B5XMC3	Arginine deiminase OS=Streptococcus pyogenes serotype M49 (strain NZ131) OX=471876 GN=arcA PE=3	------MTAQTPIHV	T	2	M P L	yes	5835.06	132090	126683	68125.4	115249	90364.7	173.1	1102	1119.4	559.9	952.8	749.2
6221	1	A0A0H3BXH0	Endolytic murein transglycosylase OS=Streptococcus pyogenes serotype M49 (strain NZ131) OX=471876 GN=mltG PE=3	------MTDFKDKDQ	T	2	M	yes	4551.67	5240.74	1119.38	490.061	1278.21	767.97	1176.9	2085.9	451	185.2	482.8	304.9
8213	2	A0A0H3BZS4	dTDP-4-dehydrorhamnose 3,5-epimerase OS=Streptococcus pyogenes serotype M49 (strain NZ131) OX=471876 GN=rmlC PE=4	------MTETFFDKP	T	2	P	yes	321.387	5285.43	3423.74	2243.09	2841.88	2155.67	18.3	294.2	196.4	130.6	156.1	126.4
1852	1	B5XK49	Bifunctional protein GlmU OS=Streptococcus pyogenes serotype M49 (strain NZ131) OX=471876 GN=glmU PE=3	------MTNYAIILA	T	2	M P	yes	732.624	8853.47	6873.94	5625.57	6843.65	5817.63	135.8	1596.6	1176	948.7	1193.5	997.4
501	2	B5XMC1	Ornithine carbamoyltransferase OS=Streptococcus pyogenes serotype M49 (strain NZ131) OX=471876 GN=arcB PE=3	------MTQVFQGRS	T	2	M L	yes	6669.71	49812.2	50234.3	49543.4	50940.3	49768.3	149.5	297	316.8	304.7	293.8	300.5
7449	1	A0A0H3BVD7	Aldehyde-alcohol dehydrogenase OS=Streptococcus pyogenes serotype M49 (strain NZ131) OX=471876 GN=adhE PE=3	NAVGDNVSAINLLNI	S	447	P	yes	28.5127	2749.62	1818.82	1406.49	1387.16	1413.73	0.9	66.3	43.7	35.5	31.1	34.8
1439	2	B5XKG9	Lysine--tRNA ligase OS=Streptococcus pyogenes serotype M49 (strain NZ131) OX=471876 GN=lysS PE=3	NDPIDQLSRFEAQAQ	S	432	M P	yes	1347.11	27071.8	18359.8	15948.3	16138.4	17945.4	58.6	1326.3	891.7	746.9	748.9	826.6
246	11	A0A0H3BZX9	PTS system, mannose-specific IIC component OS=Streptococcus pyogenes serotype M49 (strain NZ131) OX=471876 GN=manM PE=4	NGGNAAGSADPIGDI	S	258	M P L	yes	19044.2	334589	318593	297112	293308	311679	2688.3	46896.5	45444.2	40017.1	40181.6	41866.6
3033	2	B5XJU2	Probable transcriptional regulatory protein Spy49_0265 OS=Streptococcus pyogenes serotype M49 (strain NZ131) OX=471876 GN=Spy49_0265 PE=3	NGGNMGASGSVSYLF	S	124	P	yes	1601.27	24135.8	18974.2	15233.9	17743.3	15102	105.1	1604.2	1224.5	1001.7	1142.5	1008.7
582	2	A0A0H3BZ40	Oligopeptide transport ATP-binding protein oppD OS=Streptococcus pyogenes serotype M49 (strain NZ131) OX=471876 GN=oppD PE=3	NGRIANGSIVYRGQE	S	72	M L	yes	13687.4	44326.4	41272.5	34575.1	39752.3	36936.3	4277.6	10109.4	9499.1	8015.3	9358.9	8321.3
2902	1	A0A0H3BZ23	Cell division protein FtsZ OS=Streptococcus pyogenes serotype M49 (strain NZ131) OX=471876 GN=ftsZ PE=3	NHNQNQGSAFGNWDL	S	391	M P	yes	5438.74	14850.8	13633.4	7731.01	11373.1	10500	202.9	563.6	524.6	285.1	431.2	398.9
232	2	A0A0H3BZT5	Peptide chain release factor 2 OS=Streptococcus pyogenes serotype M49 (strain NZ131) OX=471876 GN=prfB PE=3	NIAAQKTSQELNELK	S	17	M L	yes	19322.4	57245.9	55753.9	46252.8	54461.6	48341.1	3749.2	11563.6	11170.5	9198.5	10730.8	9444.6
1342	3	A0A0H3BWD2	ATP-dependent zinc metalloprotease FtsH OS=Streptococcus pyogenes serotype M49 (strain NZ131) OX=471876 GN=ftsH PE=3	NKIKIDASDIDEAED	S	418	M P	yes	7804.29	46514.9	51188	32101.1	45603.7	38568.4	655.5	4696.8	4960.4	3151.7	4473.5	3768.3
2017	1	B5XIW7	Chaperonin GroEL OS=Streptococcus pyogenes serotype M49 (strain NZ131) OX=471876 GN=groEL PE=3	NKIRGTFSVVAVKAP	S	270	M	yes	716.358	7563.02	6000.77	5765.3	6167.31	4928.08	5	52.1	43.9	42.3	43.7	35.9
3503	2	B5XIJ1	30S ribosomal protein S9 OS=Streptococcus pyogenes serotype M49 (strain NZ131) OX=471876 GN=rpsI PE=3	NKKDVEEYIPHADLR	Y	38	P	yes	148.21	6493.22	5863.54	3583.95	5269.3	3996.77	8.3	456.6	413.9	242.8	346	277.9
1149	1	B5XJA2	50S ribosomal protein L9 OS=Streptococcus pyogenes serotype M49 (strain NZ131) OX=471876 GN=rplI PE=3	NLAKEATSQSIGELK	S	41	M L	yes	1286.1	13879.1	13007.8	10556	12250	10033.5	165.1	2847.1	2596.7	2305.6	2420.9	2109.7
630	2	A0A0H3BWF1	Protein translocase subunit SecY OS=Streptococcus pyogenes serotype M49 (strain NZ131) OX=471876 GN=secY PE=3	NLQKNSSYIPSVRPG	Y	347	M L	yes	3882.35	36175.2	48797.3	23543.2	46313.8	38850.3	389.1	2916.9	3938.6	1849	3631.4	3077.1
726	2	A0A0H3BZ18	Cell-division initiation protein OS=Streptococcus pyogenes serotype M49 (strain NZ131) OX=471876 GN=divIVA PE=4	NLVSKATYDAQHLLD	Y	98	M P L	yes	3556.61	34608.5	43669.1	19433.1	36575.7	31407.5	198.4	2088	2596.3	1153	2157.5	1897.7
402	2	B5XK62	50S ribosomal protein L1 OS=Streptococcus pyogenes serotype M49 (strain NZ131) OX=471876 GN=rplA PE=3	NPKTGTVTMDVAKAV	T	146	M L	yes	6812.17	71138	65283.4	52598	51479.5	51096.6	132.8	1709.9	1546.7	1259.8	1225.8	1226.3
30	3	B5XKI1	Elongation factor Tu OS=Streptococcus pyogenes serotype M49 (strain NZ131) OX=471876 GN=tuf PE=3	NQPKDYASIDAAPEE	S	52	M P L	yes	61276.5	316707	356923	250028	322721	285335	433.3	2015.5	2245.9	1550.1	1998.8	1847.4
479	4	A0A0H3C0Z0	Putative ABC transporter OS=Streptococcus pyogenes serotype M49 (strain NZ131) OX=471876 GN=Spy49_1298c PE=4	NQTIDSFSHGMRQKV	S	134	M P L	yes	4024.09	49862.4	64447.2	30637.6	58441	49038	428.4	3774	4794.7	2128.7	4181	3597.7
1699	2	B5XL08	Phosphopentomutase OS=Streptococcus pyogenes serotype M49 (strain NZ131) OX=471876 GN=deoB PE=3	NRHDYAVSPFQDTVL	S	227	M P L	yes	1071.03	22528.9	15420.9	11265.2	16139.6	13276	95.1	808.7	574.2	406.1	586.6	497.7
53	6	B5XIW7	Chaperonin GroEL OS=Streptococcus pyogenes serotype M49 (strain NZ131) OX=471876 GN=groEL PE=3	NRIALIKSQLETTTS	S	349	M P L	yes	27049.7	255343	287914	178520	257164	229986	188.8	1759	2106.3	1309.8	1822.2	1675.4
44	2	B5XIY2	Histidine ammonia-lyase OS=Streptococcus pyogenes serotype M49 (strain NZ131) OX=471876 GN=hutH PE=3	NTTVATQSRVQDPYT	S	274	M P L	yes	9824.71	228173	335802	175210	301800	277755	12508.2	37416.8	49737.2	26158.6	46902.4	41674.2
2413	1	A0A0H3BYL1	Pyruvate kinase OS=Streptococcus pyogenes serotype M49 (strain NZ131) OX=471876 GN=pyk PE=3	NVFRFNFSHGDHKEQ	S	58	M P	yes	177.451	673.743	19631.4	8125.66	19120.9	16921	1.3	6.3	190.3	72.3	173.2	157.9
381	2	B5XJR1	Elongation factor G OS=Streptococcus pyogenes serotype M49 (strain NZ131) OX=471876 GN=fusA PE=3	NVGAPQVSYRETFRA	S	480	M P L	yes	5791.18	32673	37613.8	25186.7	33203.5	29250.4	64.2	394.7	464.6	295.6	387.9	343
315	3	A0A0H3BYQ9	PTS system, IIB component OS=Streptococcus pyogenes serotype M49 (strain NZ131) OX=471876 GN=Spy49_0834 PE=4	NVGRFDKSDPASKVK	S	112	M P L	yes	10783.7	73206	89731.5	68089.9	90928.6	74275.4	244	961.7	1204.6	883.6	1147.3	1007.4
441	2	A0A0H3BWJ5	Transcription termination/antitermination protein NusG OS=Streptococcus pyogenes serotype M49 (strain NZ131) OX=471876 GN=nusG PE=3	NVTGFVGSHGNRSKP	S	100	M P L	yes	7303.47	43476.3	61130.3	25799.7	52018.6	46029.2	859.5	5121.7	7251.4	2903.7	5752.1	5198.2
506	3	A0A0H3C124	Putative mannose-specific phosphotransferase system component IID OS=Streptococcus pyogenes serotype M49 (strain NZ131) OX=471876 GN=manN PE=4	PALKKLYTSPEDRAT	T	49	M L	yes	13677.5	76640.6	78948.9	63352.4	79197.3	70786.9	595	2937.2	2900.6	2217.7	2771.8	2468.3
288	2	A0A0H3BZ18	Cell-division initiation protein OS=Streptococcus pyogenes serotype M49 (strain NZ131) OX=471876 GN=divIVA PE=4	PEVNLSETQTFKLNI	T	245	M P L	yes	457433	34499.1	24247.3	15568.4	22989.7	27723.4	25517.2	2081.4	1441.6	923.7	1356.1	1675.1
790	2	A0A0H3C1H6	Cysteine synthase OS=Streptococcus pyogenes serotype M49 (strain NZ131) OX=471876 GN=cysM PE=3	PHKIQGISAGFIPNT	S	225	M P	yes	1998.94	27880	20302.2	18942.7	16863.5	16807.5	46.8	606.1	428.3	398.5	355.5	356.7
1030	4	A0A0H3BZD6	Putative PTS system enzyme II OS=Streptococcus pyogenes serotype M49 (strain NZ131) OX=471876 GN=Spy49_1737c PE=4	PHKTMQGTVITLTSP	T	522	M	yes	4578.8	74666.7	44481.6	38394.7	38219.5	37416	931	7870.8	4537.8	3956.8	3864.1	3848.9
6384	2	B5XKI2	Triosephosphate isomerase OS=Streptococcus pyogenes serotype M49 (strain NZ131) OX=471876 GN=tpiA PE=3	PIVCCGESLETYEAG	S	131	P	yes	71.3982	4537.19	4216.33	2503.41	3667.18	4370.97	0.7	70.9	66.2	40	58.1	70.9
82	2	A0A0H3C1H3	Fructose-bisphosphate aldolase class II OS=Streptococcus pyogenes serotype M49 (strain NZ131) OX=471876 GN=fba PE=4	PIVLHGGSGIPDDQI	S	211	M P L	yes	13529.1	221859	180572	118811	140570	158464	139.8	2618.3	2204.5	1454.4	1647.3	1919.4
10046	1	A0A0H3BZR7	Mid-cell-anchored protein Z OS=Streptococcus pyogenes serotype M49 (strain NZ131) OX=471876 GN=mapZ PE=3	PKRDQFLSEDSHHPA	S	164	M P	yes	119.492	230.507	3341.83	810.959	3629.36	2456.18	25.6	71.3	1078.2	256.9	1178.7	827.5
1792	2	A0A0H3BY55	Non-specific serine/threonine protein kinase OS=Streptococcus pyogenes serotype M49 (strain NZ131) OX=471876 GN=Spy49_1257c PE=4	PKVASGPTASVKLSP	T	302	M P L	yes	22593.6	10791.7	10504.9	8288.96	10884.6	9634.33	3055.6	1525.7	1569.4	1158.2	1551.2	1343.8
80	2	A0A0H3BY55	Non-specific serine/threonine protein kinase OS=Streptococcus pyogenes serotype M49 (strain NZ131) OX=471876 GN=Spy49_1257c PE=4	PPTPTVLTQESRLDQ	T	316	M P L	yes	519839	110701	108958	83830	105658	91825.8	70304	15650.6	16278.1	11713.4	15057.7	12807.9
511	2	A0A0H3BYR4	Putative cytoplasmic membrane protein OS=Streptococcus pyogenes serotype M49 (strain NZ131) OX=471876 GN=lemA PE=3	PQETMAASNELSKQV	S	91	M P L	yes	4565.57	56636.4	70352.9	49152.8	68409.8	59955.5	301.7	3377.3	4058.3	2920.6	4193.3	3452.7
926	2	A0A0H3BZ23	Cell division protein FtsZ OS=Streptococcus pyogenes serotype M49 (strain NZ131) OX=471876 GN=ftsZ PE=3	PSAQKVISNHNQNQG	S	383	M P	yes	4213.75	33965	28111.5	16855.8	28846.8	19960.2	157.2	1289	1081.7	621.6	1093.7	758.3
1285	2	A0A0H3BXS5	Protein-export membrane protein SecG OS=Streptococcus pyogenes serotype M49 (strain NZ131) OX=471876 GN=Spy49_0421 PE=3	PSSNVFDSSGSEALF	S	35	M P L	yes	2411.72	22759.4	16166.5	13276.7	14618	12797.9	332.8	3296.7	2191.3	1790.7	1942.4	1761.5
168	2	A0A0H3BYW2	EIICB-Lac OS=Streptococcus pyogenes serotype M49 (strain NZ131) OX=471876 GN=lacE PE=4	PVTAAAGSYGAHREI	S	499	M L	yes	9005.79	107789	130566	67025.6	117576	90452.7	2350	12557.2	14517.8	7103.4	13191.6	9908.9
2623	2	A0A0H3BZB4	Phosphoenolpyruvate-protein phosphotransferase OS=Streptococcus pyogenes serotype M49 (strain NZ131) OX=471876 GN=ptsI PE=3	QAAQDELSVIRENAV	S	56	M P	yes	416.923	9708.03	8827.41	6738.3	7654.85	9799.06	13.4	394	358.5	263.5	296.8	394.8
209	4	B5XKP7	ATP synthase subunit b OS=Streptococcus pyogenes serotype M49 (strain NZ131) OX=471876 GN=atpF PE=3	QAEQSRLSAQQLEAK	S	58	M P L	yes	12462.1	100413	136974	68192.2	124822	101554	2341.1	22248.1	30251.1	15152.3	28296.6	23205.9
477	4	A0A0H3BY05	Carbamate kinase OS=Streptococcus pyogenes serotype M49 (strain NZ131) OX=471876 GN=arcC PE=3	QDQFAPGSMLPKVEA	S	273	M P	yes	3821.59	95217.1	60165.7	54017	55091.6	48198.1	193.2	1066.5	686.2	630.2	600.6	555.8
413	2	A0A0H3BZ23	Cell division protein FtsZ OS=Streptococcus pyogenes serotype M49 (strain NZ131) OX=471876 GN=ftsZ PE=3	QEKAEQVSGFRQPRT	S	325	M L	yes	6725.38	34289.1	35489.5	30609.5	33768.5	29278.3	250.9	1301.3	1365.6	1128.8	1280.3	1112.3
3769	1	B5XKM5	Septation ring formation regulator EzrA OS=Streptococcus pyogenes serotype M49 (strain NZ131) OX=471876 GN=ezrA PE=3	QERIDSLYEVFEREI	Y	298	M P	yes	85.3017	5382.17	3537.44	3300.44	3554.25	2935.94	7.6	515.3	345.6	319.2	339.6	292
27	5	A0A0H3BY55	Non-specific serine/threonine protein kinase OS=Streptococcus pyogenes serotype M49 (strain NZ131) OX=471876 GN=Spy49_1257c PE=4	QESRLDQTNQTDALQ	T	324	M P L	yes	2.94763e+06	650006	736371	521723	705760	640704	398643	91895.8	110012	72899.4	100580	89365.7
4433	2	B5XJ99	30S ribosomal protein S4 OS=Streptococcus pyogenes serotype M49 (strain NZ131) OX=471876 GN=rpsD PE=3	QHGPNNRSKLSEYGL	S	42	P	yes	1358.49	6210.01	5476.54	2705.31	4924.16	4207.75	25.4	139.3	123.7	58.6	108.4	92.1
1051	1	A0A0H3BXI3	Putative peptidoglycan branched peptide synthesis protein, serine/alanine adding enzyme OS=Streptococcus pyogenes serotype M49 (strain NZ131) OX=471876 GN=murM.1 PE=3	QKDLTILSEQLAAGK	S	288	M	yes	1180.03	19368.4	14015.4	11856.5	12716.2	11535.5	339.1	7264.5	5273.1	4245.2	4570.8	4236.4
1524	1	A0A0H3BZR7	Mid-cell-anchored protein Z OS=Streptococcus pyogenes serotype M49 (strain NZ131) OX=471876 GN=mapZ PE=3	QKFDAKYTELDTASL	T	69	M P L	yes	3688.37	16128.7	11215.7	9655.12	9928.01	9077.02	790.2	4988.9	3618.6	3058.6	3224.3	3058.1
2120	1	A0A0H3BX71	Uncharacterized protein OS=Streptococcus pyogenes serotype M49 (strain NZ131) OX=471876 GN=Spy49_0427c PE=4	QLIQRVQSLTVGRLL	S	89	M	yes	1510.86	8204.89	6132.93	5279.47	5828.56	5294.37	117.1	767.8	612.4	493.2	559.2	504
989	1	A0A0H3BYM9	Glyceraldehyde-3-phosphate dehydrogenase OS=Streptococcus pyogenes serotype M49 (strain NZ131) OX=471876 GN=plr PE=3	QLVRTLEYFAKIAK-	Y	330	M	yes	296.832	11573.2	9155.09	7181.14	8736.4	6689.06	2.4	92.9	76.1	60.6	66.4	55
760	7	A0A0H3BY05	Carbamate kinase OS=Streptococcus pyogenes serotype M49 (strain NZ131) OX=471876 GN=arcC PE=3	QMAESGASFKEDAGR	S	150	M P L	yes	5983.59	80860.9	85741.8	45737	71419.1	54094.9	302.5	905.7	977.9	533.6	778.6	623.8
7371	2	B5XKI2	Triosephosphate isomerase OS=Streptococcus pyogenes serotype M49 (strain NZ131) OX=471876 GN=tpiA PE=3	QNCYFENTGAFTGET	T	72	P	yes	1336.17	4633.18	4566.63	2841.37	3869.15	3316.76	13.1	72.4	71.7	45.4	61.3	53.8
333	3	B5XIG1	Trigger factor OS=Streptococcus pyogenes serotype M49 (strain NZ131) OX=471876 GN=tig PE=3	QPKIDVVSMEKGKEW	S	97	M L	yes	3786.26	38552.7	36251.7	31329.6	35010.3	28167.8	107.6	1359.2	1208.2	1048	1144.4	969.3
403	1	B5XMJ7	Cell cycle protein GpsB OS=Streptococcus pyogenes serotype M49 (strain NZ131) OX=471876 GN=gpsB PE=3	QPTRVAQSATNFDIL	S	84	M P L	yes	10113.8	45688.3	32802.3	25074.9	25660.4	19182.9	1117.4	7430.5	5402.1	4143.7	4254.6	3291.7
712	1	A0A0H3BZC9	Uridylate kinase OS=Streptococcus pyogenes serotype M49 (strain NZ131) OX=471876 GN=pyrH PE=3	QRILIKLSGEALAGE	S	13	M L	yes	2763.3	14575.1	16978.8	15099.5	16797.3	14363.6	639.9	3243	3708.6	3251.9	3718.2	3142.5
1251	2	B5XI23	Protein translocase subunit SecA OS=Streptococcus pyogenes serotype M49 (strain NZ131) OX=471876 GN=secA PE=3	QSQQSANTDDLPKVE	T	809	M P L	yes	74888.3	5598.11	9635.89	4520.26	10966.1	9807.17	5292	428.4	731.1	329.2	775.7	733
2408	1	B5XJ99	30S ribosomal protein S4 OS=Streptococcus pyogenes serotype M49 (strain NZ131) OX=471876 GN=rpsD PE=3	QSRRLGLSLTGTGKE	S	18	M	yes	647.156	8933.85	7158.91	6458.58	6377.79	5436.72	12.1	200.4	161.7	139.9	140.4	119
940	1	A0A0H3C0J7	Phosphocarrier protein HPr OS=Streptococcus pyogenes serotype M49 (strain NZ131) OX=471876 GN=ptsH PE=3	QTASKFASDITLDYK	S	31	M P L	yes	14118.2	8728.4	10041.4	9341.2	9623.4	8231.3	14118.2	8728.4	10041.4	9341.2	9623.4	8231.3
514	3	A0A0H3BZ03	R3H domain protein OS=Streptococcus pyogenes serotype M49 (strain NZ131) OX=471876 GN=Spy49_0209 PE=4	QVDIEGISDKTVYKA	S	55	M P L	yes	6987.24	50869	66538	30170.2	59083.4	50134.2	619.5	5936	8043.3	3564.7	6652.8	6179.6
591	2	B5XKI1	Elongation factor Tu OS=Streptococcus pyogenes serotype M49 (strain NZ131) OX=471876 GN=tuf PE=3	QVIAKPGSINPHTKF	S	302	M P L	yes	3436.46	30012.9	50807.4	15839.5	45724.8	35431.3	24.3	191	319.7	98.2	283.2	229.4
2221	1	B5XJY9	Probable manganese-dependent inorganic pyrophosphatase OS=Streptococcus pyogenes serotype M49 (strain NZ131) OX=471876 GN=ppaC PE=3	QVNTVDISEVLERQE	S	227	M P	yes	143.747	7172.5	5491.15	3695.9	4527.57	5181.32	5.1	262.5	201.4	134.4	162.2	188.8
1843	1	B5XK64	Ribosome-recycling factor OS=Streptococcus pyogenes serotype M49 (strain NZ131) OX=471876 GN=frr PE=3	RAGRANASLLDRIQV	S	35	M	yes	136.643	5850.36	4938.27	3945.41	4320.49	3332.01	8.2	428.7	347.1	291.4	306.7	248.5
124	2	B5XJR0	30S ribosomal protein S7 OS=Streptococcus pyogenes serotype M49 (strain NZ131) OX=471876 GN=rpsG PE=3	RARRVGGSNYQVPVE	S	83	M P L	yes	7780.82	109295	153531	73577.5	138945	114456	251.6	4339	6035	2763.6	5178.1	4356.5
1136	2	A0A0H3BYR4	Putative cytoplasmic membrane protein OS=Streptococcus pyogenes serotype M49 (strain NZ131) OX=471876 GN=lemA PE=3	RARVANASTPQETMA	S	82	M P	yes	1938.52	24203.7	27648.5	17775.5	26660.5	22782.6	128.1	1443.3	1594.9	1056.2	1634.2	1312
513	2	B5XJ52	50S ribosomal protein L18 OS=Streptococcus pyogenes serotype M49 (strain NZ131) OX=471876 GN=rplR PE=3	RAVAKGISEVVFDRG	S	89	M L	yes	2510.58	31200.3	24809.8	23184.3	24170.5	19958.7	101.7	1344.8	1051.8	998.4	1051.8	878.7
4420	1	A0A0H3BZQ5	SSU ribosomal protein S1p OS=Streptococcus pyogenes serotype M49 (strain NZ131) OX=471876 GN=rpsA PE=4	RAVKGGLSIEFEGLR	S	123	P	yes	238.58	2480.63	1836.1	1636.6	1653.93	1811.59	4.5	48.1	34.4	30.6	31.5	33.7
1745	1	A0A0H3BY55	Non-specific serine/threonine protein kinase OS=Streptococcus pyogenes serotype M49 (strain NZ131) OX=471876 GN=Spy49_1257c PE=4	RDLMTALSYNRSRER	S	274	M P	yes	1118	12024.6	8870.3	7209.72	8360.63	6288.34	151.2	1700	1325.2	1007.4	1191.5	877.1
123	2	B5XK64	Ribosome-recycling factor OS=Streptococcus pyogenes serotype M49 (strain NZ131) OX=471876 GN=frr PE=3	RFAQSHQSLSREYAS	S	19	M L	yes	17365.3	94222.6	111991	72103.2	113819	93049.6	1042.1	6904.4	7871.6	5325.4	8079.7	6939.6
1608	1	B5XKM5	Septation ring formation regulator EzrA OS=Streptococcus pyogenes serotype M49 (strain NZ131) OX=471876 GN=ezrA PE=3	RINIEAVSRLSEVAT	S	478	M	yes	993.315	12385.4	11440.4	9684.18	10492.2	8828.93	88.5	1185.8	1117.7	936.6	1002.5	878.1
2877	1	A0A0H3BZ90	Alkyl hydroperoxide reductase protein F OS=Streptococcus pyogenes serotype M49 (strain NZ131) OX=471876 GN=nox3 PE=3	RISIENITLDRQPSF	T	57	M P	yes	355.083	5498.53	3453.14	2885.04	3144.88	2697.56	27.4	325.5	211.8	177.4	186.4	167.1
247	1	A0A0H3BZ76	Putative phosphoprotein phosphatase (PppL protein) OS=Streptococcus pyogenes serotype M49 (strain NZ131) OX=471876 GN=pppL PE=4	RIYDLGQSEDFKGMG	S	91	M P L	yes	3069.6	57005	48871.6	37147.8	41239.6	35088.9	221.7	5834.6	5056.9	3971.5	4331.7	3719.3
842	1	B5XKT9	50S ribosomal protein L35 OS=Streptococcus pyogenes serotype M49 (strain NZ131) OX=471876 GN=rpmI PE=3	RKAGLVSSGDFKRIK	S	52	M P	yes	6178.71	17521.4	16867.1	13670.1	15267	14233.9	4030.3	19388.4	18929	14684	15709.3	14171.4
500	2	A0A0H3BZ33	Xaa-His dipeptidase OS=Streptococcus pyogenes serotype M49 (strain NZ131) OX=471876 GN=Spy49_1193c PE=4	RKKTGDQSPAQSSGG	S	384	M P L	yes	2499.57	42892.7	42675.7	33483.3	40075	34692.3	357.3	2271.3	2294.2	1863.6	2144.3	1904
1258	3	A0A0H3BWE7	Alcohol dehydrogenase OS=Streptococcus pyogenes serotype M49 (strain NZ131) OX=471876 GN=adhP PE=3	RKVLDFIS-------	S	338	M	yes	3161.23	32883	24586.6	22990	23466.8	19983.8	544.9	1079.7	812.6	751.1	734.1	628.7
1013	1	A0A0H3BYS4	Dihydropteroate synthase OS=Streptococcus pyogenes serotype M49 (strain NZ131) OX=471876 GN=folP PE=3	RPGCRFVSATDEIDR	S	67	M P L	yes	3688.17	15801.3	14783.7	12442.3	13799	12994.9	617.5	2413.7	2319.8	1987.8	2240.6	2098.5
647	1	B5XLC6	Elongation factor 4 OS=Streptococcus pyogenes serotype M49 (strain NZ131) OX=471876 GN=lepA PE=3	RRRGDFVTMDYIDDN	T	440	M P	yes	3486.31	32633.7	23530.3	20215.9	23033.7	17634.6	713.7	7901.7	5661.1	4684.9	5383	4161.4
1705	1	A0A0H3BYE4	Signal recognition particle protein OS=Streptococcus pyogenes serotype M49 (strain NZ131) OX=471876 GN=ffh PE=3	RRRIAAGSGNSFVEV	S	406	M P L	yes	1719.38	11758.4	11439.9	7862.15	9670.19	8944.41	124.6	912.3	941.6	613.8	743.7	712.9
390	4	B5XK61	50S ribosomal protein L11 OS=Streptococcus pyogenes serotype M49 (strain NZ131) OX=471876 GN=rplK PE=3	RSMGFTVTD------	T	140	M P	yes	4662.8	81801.8	71717.6	57762.8	65892.4	57226.5	108.7	2604.1	2269.3	1784.3	1988.1	1793.3
4697	1	A0A0H3C124	Putative mannose-specific phosphotransferase system component IID OS=Streptococcus pyogenes serotype M49 (strain NZ131) OX=471876 GN=manN PE=4	RSQFLQGSWNYERMQ	S	25	P	yes	206.886	5928.35	5258.54	3785.09	4543.03	3558.99	9	227.2	193.2	132.5	159	124.1
858	4	A0A0H3BZJ0	Formate acetyltransferase OS=Streptococcus pyogenes serotype M49 (strain NZ131) OX=471876 GN=pfl PE=3	RVFHEVLSMDDAAEA	S	764	M P	yes	1941.44	56234.4	39810.8	23939	32390.8	33239.5	83.5	736.3	525.4	309.2	413.8	436.2
7648	1	B5XJ36	50S ribosomal protein L3 OS=Streptococcus pyogenes serotype M49 (strain NZ131) OX=471876 GN=rplC PE=3	RYHRRPGSMGPVAPN	S	143	P	yes	1442.63	2137.83	3537.66	1452.62	3320.85	2836.6	38.3	74.2	120.9	48.9	111.5	95.9
1104	1	A0A0H3BXF8	Putative sugar ABC transporter OS=Streptococcus pyogenes serotype M49 (strain NZ131) OX=471876 GN=Spy49_0973c PE=4	SAKVSDISVGAQQRV	S	143	M P	yes	4007.73	16370.3	16433.2	13114.9	16175.1	14294.2	331.3	1267.6	1242.2	972.2	1218.3	1119.1
1207	1	B5XIW8	Co-chaperonin GroES OS=Streptococcus pyogenes serotype M49 (strain NZ131) OX=471876 GN=groES PE=3	SDIIAIVTK------	T	95	M P	yes	896.852	13667.5	10055.4	7378.68	9259.97	7542.49	11	190.7	156.4	111	143.2	117.7
389	1	A0A0H3C114	Inosine-5'-monophosphate dehydrogenase OS=Streptococcus pyogenes serotype M49 (strain NZ131) OX=471876 GN=guaB PE=3	SDRYFQGSVNEANKL	S	411	M P L	yes	5506.73	34311.9	32177	28519.8	29830.7	26000.7	192.9	1448.6	1364	1204.6	1213.4	1082
6596	1	A0A0H3BZR7	Mid-cell-anchored protein Z OS=Streptococcus pyogenes serotype M49 (strain NZ131) OX=471876 GN=mapZ PE=3	SEIKAGVTKDDSILD	T	42	M P	yes	5722.07	1393.06	1292.47	697.317	1020.42	940.916	1225.9	430.9	417	220.9	331.4	317
46	4	A0A0H3C124	Putative mannose-specific phosphotransferase system component IID OS=Streptococcus pyogenes serotype M49 (strain NZ131) OX=471876 GN=manN PE=4	SEITKDMSGGILQDI	S	174	M P	yes	41464.6	281062	277325	220561	232146	231223	1803.8	10771.5	10189	7720.9	8124.8	8062.6
1645	2	B5XKM5	Septation ring formation regulator EzrA OS=Streptococcus pyogenes serotype M49 (strain NZ131) OX=471876 GN=ezrA PE=3	SFEAGVQSSFEHALR	S	524	M P	yes	805.876	21350.1	13560.2	10972.5	13034.3	11854.4	71.8	2044.1	1324.8	1061.2	1245.4	1179
8468	1	A0A0H3BWG0	DNA-directed RNA polymerase subunit beta' OS=Streptococcus pyogenes serotype M49 (strain NZ131) OX=471876 GN=rpoC PE=3	SGARGNISNFSQLAG	S	731	P	yes	384.127	2438.03	1745.21	1587.55	1803.82	1439.29	26	175.1	123.8	111.3	123.3	100
144	3	B5XJR1	Elongation factor G OS=Streptococcus pyogenes serotype M49 (strain NZ131) OX=471876 GN=fusA PE=3	SGVLNSGSYVMNTSK	S	338	M P L	yes	9489.59	94459.5	87792.6	60231.6	76541.8	66227	105.2	1141.1	1084.4	706.9	894.2	776.6
5149	1	B5XIF1	Phosphoglycerate kinase OS=Streptococcus pyogenes serotype M49 (strain NZ131) OX=471876 GN=pgk PE=3	SIIGGGDSAAAAINL	S	357	P	yes	45.3413	4356.73	3420.59	2489.67	2956.58	2811.25	0.6	77.7	62.1	44.2	52.4	50.7
153	3	B5XKI1	Elongation factor Tu OS=Streptococcus pyogenes serotype M49 (strain NZ131) OX=471876 GN=tuf PE=3	SIREGGRTVGSGIVS	T	387	M P L	yes	10224.5	172173	149387	134748	137772	131408	72.3	1095.7	940	835.4	853.3	850.8
743	2	A0A0H3BY61	Ribonuclease Y OS=Streptococcus pyogenes serotype M49 (strain NZ131) OX=471876 GN=rny PE=3	SKEKVLDSKEQSLTD	S	129	M	yes	2035.31	18144.7	19222.9	11739.3	17982	15665.1	222.8	2508	2591.9	1659.3	2381	2153.7
8578	2	B5XKM5	Septation ring formation regulator EzrA OS=Streptococcus pyogenes serotype M49 (strain NZ131) OX=471876 GN=ezrA PE=3	SLHLIGQSQTSFREW	S	65	P	yes	244.681	4841.14	3230.37	2070.01	2772.44	2194.92	21.8	463.5	315.6	200.2	264.9	218.3
624	2	A0A0H3BYQ9	PTS system, IIB component OS=Streptococcus pyogenes serotype M49 (strain NZ131) OX=471876 GN=Spy49_0834 PE=4	SNTKVHLSQLVN---	S	159	M	yes	3345.61	42399.6	32060.8	26416.1	28048.1	23608.3	75.7	557	430.4	342.8	353.9	320.2
3406	1	B5XKP7	ATP synthase subunit b OS=Streptococcus pyogenes serotype M49 (strain NZ131) OX=471876 GN=atpF PE=3	SQASKIISDAKEIGQ	S	82	M	yes	131.483	3298.78	2792.36	2961.75	3154.44	2385.47	24.7	730.9	616.7	658.1	715.1	545.1
136	3	B5XIW7	Chaperonin GroEL OS=Streptococcus pyogenes serotype M49 (strain NZ131) OX=471876 GN=groEL PE=3	SQLETTTSDFDREKL	S	356	M P L	yes	16877.4	183356	221195	124601	198172	171824	117.8	1263.1	1618.2	914.2	1404.2	1251.7
158	12	B5XJX2	UPF0154 protein Spy49_0296 OS=Streptococcus pyogenes serotype M49 (strain NZ131) OX=471876 GN=Spy49_0296 PE=3	SQMGQKPSEAKIQQT	S	56	M L	yes	28865.6	375315	440754	244556	408882	337959	14519.7	224052	257806	146464	243025	199897
284	2	A0A0H3BXI0	Uncharacterized protein OS=Streptococcus pyogenes serotype M49 (strain NZ131) OX=471876 GN=Spy49_1001c PE=3	SSTSQFVSEQTEKLK	S	141	M P L	yes	2466.41	50427.1	80189.1	35411.7	62054.3	47716.9	90.6	1553.2	2408.7	1046	1872.4	1496.5
322	1	B5XKI1	Elongation factor Tu OS=Streptococcus pyogenes serotype M49 (strain NZ131) OX=471876 GN=tuf PE=3	SVNQPKDYASIDAAP	Y	50	M P	yes	10210.4	45035	50584.9	39018	47307.1	42119.1	72.2	286.6	318.3	241.9	293	272.7
79	3	B5XLJ8	L-lactate dehydrogenase OS=Streptococcus pyogenes serotype M49 (strain NZ131) OX=471876 GN=ldh PE=3	SVRDAAYSIINKKGA	S	225	M P L	yes	13169.4	116905	138277	77830.8	120164	95263.6	153	1651.9	1911.1	1063.4	1649.2	1344.1
2636	2	B5XI23	Protein translocase subunit SecA OS=Streptococcus pyogenes serotype M49 (strain NZ131) OX=471876 GN=secA PE=3	SYADQMASLSDRDLQ	S	35	M P	yes	5282.66	16401	18313.6	10674.5	17814	16598.6	373.3	1255.1	1389.5	777.4	1260.1	1240.6
451	2	B5XMM9	Glycine--tRNA ligase beta subunit OS=Streptococcus pyogenes serotype M49 (strain NZ131) OX=471876 GN=glyS PE=3	SYEADLRSQFVIADA	S	208	M P L	yes	6097.36	35230.7	33493.6	27249.5	31108.9	28075.9	1401.5	7585.5	6931.1	5567.4	6366.7	5756.9
222	1	B5XI32	Elongation factor P OS=Streptococcus pyogenes serotype M49 (strain NZ131) OX=471876 GN=efp PE=3	TAEGTYVSRA-----	S	183	M P L	yes	4336.08	58504.3	58504.4	34154.1	47951.4	46297.7	161.7	1972.7	2024.5	1158.2	1591.9	1544.8
586	1	B5XJ63	50S ribosomal protein L17 OS=Streptococcus pyogenes serotype M49 (strain NZ131) OX=471876 GN=rplQ PE=3	TALQKLFSEIAPRYA	S	93	M L	yes	1474.44	22514.2	18655	16809.6	18360	14877.5	25.9	523.1	417.9	365.3	396.5	331.6
104	4	A0A0H3BZ76	Putative phosphoprotein phosphatase (PppL protein) OS=Streptococcus pyogenes serotype M49 (strain NZ131) OX=471876 GN=pppL PE=4	TDIGQKRSNNQDFIN	S	14	M P L	yes	33177.2	156734	191019	135473	181368	162771	2396.2	16042.1	19765.4	14483.5	19050.4	17253.2
2021	2	B5XHZ0	Chaperone protein DnaK OS=Streptococcus pyogenes serotype M49 (strain NZ131) OX=471876 GN=dnaK PE=3	TEGKGFDTERDAAQS	T	530	P	yes	479.152	17524	9473.89	7438.38	8085.38	7878.65	4.5	165.2	93.7	71.3	75.4	78.7
52	2	B5XHZ0	Chaperone protein DnaK OS=Streptococcus pyogenes serotype M49 (strain NZ131) OX=471876 GN=dnaK PE=3	TERDAAQSALDELKA	S	537	M L	yes	16206	194270	194614	138273	172184	147622	152.2	1831.4	1924.8	1325.4	1605.7	1474.6
3742	1	B5XJ70	Tyrosine--tRNA ligase OS=Streptococcus pyogenes serotype M49 (strain NZ131) OX=471876 GN=tyrS PE=3	TGKKFGKSEGNAVWL	S	233	M	yes	467.051	5601.88	5402.28	4302.23	5099.93	4533.55	52.5	938	906.3	717	837.5	769.8
2571	1	A0A0H3BYL1	Pyruvate kinase OS=Streptococcus pyogenes serotype M49 (strain NZ131) OX=471876 GN=pyk PE=3	TIDRNAQTLLNEYGR	T	365	M P	yes	2238.62	8149.09	9088.41	7102.93	8754.53	7437.09	16.4	76.2	88.1	63.2	79.3	69.4
305	4	A0A0H3BXI0	Uncharacterized protein OS=Streptococcus pyogenes serotype M49 (strain NZ131) OX=471876 GN=Spy49_1001c PE=3	TISDTVNSDEAAK--	S	157	M P L	yes	9432.8	88383.9	119939	70007.5	110193	96788.9	346.5	2722.3	3602.7	2067.9	3324.9	3035.5
6159	1	B5XJR0	30S ribosomal protein S7 OS=Streptococcus pyogenes serotype M49 (strain NZ131) OX=471876 GN=rpsG PE=3	TIVYDAFSAIKEATG	S	48	P	yes	71.1284	2942.07	2579.63	1797.11	2318.39	2385.54	2.3	116.8	101.4	67.5	86.4	90.8
615	1	A0A0H3BZ43	Uncharacterized protein OS=Streptococcus pyogenes serotype M49 (strain NZ131) OX=471876 GN=Spy49_1003c PE=3	TIYDSIKSIVEEEVK	S	99	M P L	yes	7593.47	26257.7	31964.7	18649.3	29339.4	25755.2	306	970	1186.1	676.3	1060.2	967.8
385	4	B5XKI1	Elongation factor Tu OS=Streptococcus pyogenes serotype M49 (strain NZ131) OX=471876 GN=tuf PE=3	TKFKGEVYILSKDEG	Y	314	M P	yes	3026.35	47203.5	36218.3	30372.4	34196.7	32326.8	21.4	300.4	227.9	188.3	211.8	209.3
404	4	A0A0H3C0S1	Putative sugar ABC transporter OS=Streptococcus pyogenes serotype M49 (strain NZ131) OX=471876 GN=Spy49_0972c PE=4	TLGFEIRSVGLNPHA	S	223	M L	yes	11293.1	88874.5	103522	47051.3	85084.1	70737.1	16338	97709.9	112724	50774.5	93312	77781.2
483	1	B5XHZ0	Chaperone protein DnaK OS=Streptococcus pyogenes serotype M49 (strain NZ131) OX=471876 GN=dnaK PE=3	TLGRFQLTDIPAAPR	T	430	M P L	yes	2225.4	37137.7	24923.3	21511.8	21918.5	19271.2	20.9	350.1	246.5	206.2	204.4	192.5
245	4	A0A0H3BZ03	R3H domain protein OS=Streptococcus pyogenes serotype M49 (strain NZ131) OX=471876 GN=Spy49_0209 PE=4	TMDPMSNSERKIVHK	S	270	M P L	yes	8721.93	122267	145050	88492.1	133185	114680	773.3	14267.6	17534.1	10455.6	14996.6	14135.6
4006	1	B5XI23	Protein translocase subunit SecA OS=Streptococcus pyogenes serotype M49 (strain NZ131) OX=471876 GN=secA PE=3	TMEGRRFSDGLHQAI	S	331	P	yes	506.614	5298.87	7189.68	2639.11	6135.46	5056.11	35.8	405.5	545.5	192.2	434	377.9
2055	1	A0A0H3C052	NADH oxidase OS=Streptococcus pyogenes serotype M49 (strain NZ131) OX=471876 GN=nox1 PE=4	TNYIALASNAVRTGI	S	311	M P	yes	200.082	12574.3	8655.52	6851.76	7628.09	6319.93	6.6	243.6	174.8	136	148.1	129.1
1525	1	A0A0H3C002	Uncharacterized protein OS=Streptococcus pyogenes serotype M49 (strain NZ131) OX=471876 GN=Spy49_1390c PE=4	TPRSYTISEAGYRSG	S	318	M P	yes	5359.39	15399.3	14743.7	12961.6	15106.6	12957	2157.5	6424.6	5818	5108.4	5801.7	5031.2
1064	1	A0A0H3BXT4	Putative sugar transferase OS=Streptococcus pyogenes serotype M49 (strain NZ131) OX=471876 GN=Spy49_0433 PE=4	TPTLYSKSLIESYGV	S	118	M	yes	4267.25	16052.2	13406.1	11125.8	13588.2	11419.1	4103	15390.5	13030.7	10291.4	12790.1	11159.7
236	2	A0A0H3BZJ0	Formate acetyltransferase OS=Streptococcus pyogenes serotype M49 (strain NZ131) OX=471876 GN=pfl PE=3	TPYDGDESFLAGATE	S	45	M P L	yes	2636.64	92443.5	58488.6	50301.3	54386.4	49699.2	113.4	1210.4	771.9	649.7	694.8	652.2
8356	1	A0A0H3BYM9	Glyceraldehyde-3-phosphate dehydrogenase OS=Streptococcus pyogenes serotype M49 (strain NZ131) OX=471876 GN=plr PE=3	TQGRFDGTVEVKEGG	T	57	M	yes	0	1083.82	625.578	604.354	697.333	486.477	0	8.7	5.2	5.1	5.3	4
1476	2	A0A0H3BZ76	Putative phosphoprotein phosphatase (PppL protein) OS=Streptococcus pyogenes serotype M49 (strain NZ131) OX=471876 GN=pppL PE=4	TQSIGQASPVEPDLG	S	170	M P	yes	1345.81	40016.6	27507.6	24606.5	23878.1	25460.3	97.2	4095.8	2846.3	2630.7	2508.1	2698.7
1307	1	B5XMJ7	Cell cycle protein GpsB OS=Streptococcus pyogenes serotype M49 (strain NZ131) OX=471876 GN=gpsB PE=3	TRVAQSATNFDILKR	T	86	P L	yes	40859.9	8721.38	6664.78	5536.96	5919.04	4584.04	4514.3	1418.4	1097.6	915	981.4	786.6
10261	1	A0A0H3C124	Putative mannose-specific phosphotransferase system component IID OS=Streptococcus pyogenes serotype M49 (strain NZ131) OX=471876 GN=manN PE=4	TSPEDRATALERHME	T	56	P	yes	20.6886	1427.29	1292.86	577.047	1368.62	765.714	0.9	54.7	47.5	20.2	47.9	26.7
521	1	B5XIY6	Elongation factor Ts OS=Streptococcus pyogenes serotype M49 (strain NZ131) OX=471876 GN=tsf PE=3	TVEAYLDSVNAKAIA	S	308	M P L	yes	3144.09	30237.6	29059.9	19724.4	25312.4	22143.2	53.4	603.4	588.7	384.5	491.5	433
827	3	B5XKR6	30S ribosomal protein S21 OS=Streptococcus pyogenes serotype M49 (strain NZ131) OX=471876 GN=rpsU PE=3	TVVRKNESLDDALRR	S	11	M P L	yes	5570.1	39075.7	55836.2	25337.6	51057.2	39443.4	5570.1	39075.7	55836.2	25337.6	51057.2	39443.4
197	3	A0A0H3BVE1	30S ribosomal protein S5 OS=Streptococcus pyogenes serotype M49 (strain NZ131) OX=471876 GN=rpsE PE=3	VAALRGISVSDLA--	S	159	M P	yes	8404.14	124515	106099	87903.2	102573	81613.3	107	1911.2	1645.2	1275.8	1474.5	1218.2
7864	2	A0A0H3BZL9	PTS system, fructose-specific IIABC component OS=Streptococcus pyogenes serotype M49 (strain NZ131) OX=471876 GN=fruA PE=4	VADGIKKSQELISLI	S	252	P	yes	0	3446.62	2232.29	1598.64	2257.61	2346.94	0	136.4	84.3	59	85.4	87.5
1042	1	A0A0H3BVE1	30S ribosomal protein S5 OS=Streptococcus pyogenes serotype M49 (strain NZ131) OX=471876 GN=rpsE PE=3	VADITSKSLGSNTPI	S	126	M P	yes	2780.43	18795.9	16541.6	11871.6	15380.7	12347.2	35.4	288.5	256.5	172.3	221.1	184.3
490	2	A0A0H3BZ23	Cell division protein FtsZ OS=Streptococcus pyogenes serotype M49 (strain NZ131) OX=471876 GN=ftsZ PE=3	VAGAQYASDQAKQSV	S	348	M P	yes	4524.69	42046.5	74199	34942.8	67122.8	59272.6	168.8	1595.7	2855.1	1288.6	2544.9	2251.8
423	2	A0A0H3C1H3	Fructose-bisphosphate aldolase class II OS=Streptococcus pyogenes serotype M49 (strain NZ131) OX=471876 GN=fba PE=4	VAKVNVNTESQIAFS	T	233	M P L	yes	16790.4	59229.1	51620.1	33174.6	44945.2	39876	173.5	699	630.2	406.1	526.7	483
4618	1	A0A0H3BX75	Catabolite control protein A OS=Streptococcus pyogenes serotype M49 (strain NZ131) OX=471876 GN=ccpA PE=4	VAREAGVSMATVSRV	S	19	P	yes	308.178	2722.27	2397.47	1967.87	2333.68	1882.31	32.7	191.8	173.7	136.1	162.1	131.3
334	1	B5XJ99	30S ribosomal protein S4 OS=Streptococcus pyogenes serotype M49 (strain NZ131) OX=471876 GN=rpsD PE=3	VDPGQVISVREKSMK	S	141	M P L	yes	1647.31	34785.8	32013.7	26046.7	29999.2	25209.9	30.8	780.3	723.1	564.2	660.4	551.8
527	1	A0A0H3BY05	Carbamate kinase OS=Streptococcus pyogenes serotype M49 (strain NZ131) OX=471876 GN=arcC PE=3	VEDATSKSLTGVEAV	S	205	M P L	yes	1313.42	26641.1	22761.6	18411.4	20161.7	17725.2	66.4	298.4	259.6	214.8	219.8	204.4
266	2	B5XKI1	Elongation factor Tu OS=Streptococcus pyogenes serotype M49 (strain NZ131) OX=471876 GN=tuf PE=3	VEDVFSITGRGTVAS	T	225	M P L	yes	6604.23	84586	73390.2	47421.6	60740.3	65534	46.7	538.3	461.8	294	376.2	424.3
2949	1	A0A0H3BYC1	DNA-directed RNA polymerase subunit alpha OS=Streptococcus pyogenes serotype M49 (strain NZ131) OX=471876 GN=rpoA PE=3	VEPARVGSNDGFDKL	S	185	M	yes	74.9747	3781.85	3048.28	3725.92	3351.27	2906.14	3.1	169.8	134.3	163.6	145.4	131.2
2836	1	A0A0H3BZN1	Uncharacterized protein OS=Streptococcus pyogenes serotype M49 (strain NZ131) OX=471876 GN=Spy49_1218c PE=4	VFDKAVESVETAVDK	S	34	M	yes	2123.61	5624.14	5368.16	4124.51	5040.01	4535.26	364.1	1178.4	1081	839.5	1003.2	950.7
713	2	A0A0H3BWJ5	Transcription termination/antitermination protein NusG OS=Streptococcus pyogenes serotype M49 (strain NZ131) OX=471876 GN=nusG PE=3	VGSHGNRSKPTPLLE	S	105	M P L	yes	1693.52	35504.6	40136.7	21155.4	36191.7	30682	199.3	4182.6	4761.1	2381	4002	3465
754	2	B5XJ44	50S ribosomal protein L29 OS=Streptococcus pyogenes serotype M49 (strain NZ131) OX=471876 GN=rpmC PE=3	VKELRGLSQEELAKK	S	17	M L	yes	4450.25	22100.5	19558	18832.2	19610.8	18587.2	2419.2	20301.5	17843.9	16480.1	16742.3	15386
5256	1	B5XIF1	Phosphoglycerate kinase OS=Streptococcus pyogenes serotype M49 (strain NZ131) OX=471876 GN=pgk PE=3	VKQPGVKSIIGGGDS	S	350	P	yes	83.1257	4227.77	3784.13	2647.39	3080.71	3077.41	1.1	75.4	68.7	47	54.6	55.5
1755	1	A0A0H3C2S7	Uncharacterized protein OS=Streptococcus pyogenes serotype M49 (strain NZ131) OX=471876 GN=Spy49_1801c PE=4	VKTVGLDSKSPLKTI	S	137	P	yes	5784.04	9831.3	8529.77	4541.38	7106.51	5265.15	1496.2	2788.8	2341.8	1213.2	1827.4	1408
2171	1	A0A0H3BZJ8	Cell division protein FtsA OS=Streptococcus pyogenes serotype M49 (strain NZ131) OX=471876 GN=ftsA PE=3	VKVDVVGSEEPVEVT	S	280	M P	yes	879.672	11209.3	9849.65	7267.25	8510.01	7297.72	82.8	1088.7	890.1	675.4	807.1	677.7
3619	1	B5XIW7	Chaperonin GroEL OS=Streptococcus pyogenes serotype M49 (strain NZ131) OX=471876 GN=groEL PE=3	VLEKAFGSPLITNDG	S	45	P	yes	1031.56	21919.7	13231.8	11094.4	11629	9911.06	7.2	151	96.8	81.4	82.4	72.2
531	2	B5XIW7	Chaperonin GroEL OS=Streptococcus pyogenes serotype M49 (strain NZ131) OX=471876 GN=groEL PE=3	VLNKIRGTFSVVAVK	T	268	M P L	yes	2550.23	26506.9	20954.8	18427.1	20378.9	17021.8	17.8	182.6	153.3	135.2	144.4	124
1809	3	B5XJD9	Acetate kinase OS=Streptococcus pyogenes serotype M49 (strain NZ131) OX=471876 GN=ackA PE=3	VNMLNKKSGLSGVSG	S	272	M P	yes	7620.32	27227.7	27674.5	20430.7	22552.8	23150.8	314.7	766.7	720.7	501.3	568.8	587.4
14618	1	B5XIG1	Trigger factor OS=Streptococcus pyogenes serotype M49 (strain NZ131) OX=471876 GN=tig PE=3	VNVTFPESYQAEDLA	S	222	P	yes	21.113	975.731	1425.22	825.093	1183.94	1673.85	0.6	34.4	47.5	27.6	38.7	57.6
3744	2	B5XJ35	30S ribosomal protein S10 OS=Streptococcus pyogenes serotype M49 (strain NZ131) OX=471876 GN=rpsJ PE=3	VPLPTERSLYTIIRA	S	47	M	yes	38.0222	3927.92	2919.19	2545.06	2650.5	2252.46	0.6	72.7	54.8	45.4	48	40.7
310	2	B5XKI2	Triosephosphate isomerase OS=Streptococcus pyogenes serotype M49 (strain NZ131) OX=471876 GN=tpiA PE=3	VRVQYGGSVKPENVK	S	214	M P L	yes	16217.6	71455.9	85039.9	47633.7	79200.9	67851.8	159	1116.6	1335.2	761.1	1254.8	1100.6
677	3	A0A0H3BZD6	Putative PTS system enzyme II OS=Streptococcus pyogenes serotype M49 (strain NZ131) OX=471876 GN=Spy49_1737c PE=4	VSDAPVATAPHKTMQ	T	513	M L	yes	3130.4	48790.2	54436	20296.8	39050.3	28153.6	636.5	5143.1	5553.3	2091.7	3948.1	2896.1
544	3	A0A0H3BZ43	Uncharacterized protein OS=Streptococcus pyogenes serotype M49 (strain NZ131) OX=471876 GN=Spy49_1003c PE=3	VSLQDKVSDMARSTF	S	141	M P L	yes	8943.42	57390.6	58712	30413	50055.7	41187.6	360.4	2120.1	2178.6	1102.9	1808.8	1547.7
94	2	A0A0H3BYM9	Glyceraldehyde-3-phosphate dehydrogenase OS=Streptococcus pyogenes serotype M49 (strain NZ131) OX=471876 GN=plr PE=3	VTLDKNVSVDEINAA	S	255	M P L	yes	9956.25	116093	113831	88283	101824	90314.5	80.5	931.9	946.2	745	773.9	742.6
4608	2	A0A0H3BY45	Ribosome hibernation promoting factor OS=Streptococcus pyogenes serotype M49 (strain NZ131) OX=471876 GN=hpf PE=3	VVRTKNVTLKPMDVE	T	134	P	yes	805.753	7612.18	5803.37	3365.69	5533.51	3549.95	17.3	168.2	133.6	75.1	118	81.4
732	1	B5XMC3	Arginine deiminase OS=Streptococcus pyogenes serotype M49 (strain NZ131) OX=471876 GN=arcA PE=3	VVVYNRNTITNAILE	T	371	M P L	yes	1709.06	23037.8	17586.7	15440.4	18434.1	14763.3	50.7	192.2	155.4	126.9	152.4	122.4
3074	2	A0A0H3BZ76	Putative phosphoprotein phosphatase (PppL protein) OS=Streptococcus pyogenes serotype M49 (strain NZ131) OX=471876 GN=pppL PE=4	WLFETIQSENQRIYD	S	80	M P	yes	246.454	10237.2	7202.83	5962.92	6627.16	5403.01	17.8	1047.8	745.3	637.5	696.1	572.7
2007	3	B5XKI1	Elongation factor Tu OS=Streptococcus pyogenes serotype M49 (strain NZ131) OX=471876 GN=tuf PE=3	YETETRHYAHIDAPG	Y	80	P L	yes	3563.74	16483.5	55193.6	16162.1	53103.4	45918.6	25.2	104.9	347.3	100.2	328.9	297.3
2540	2	B5XIY6	Elongation factor Ts OS=Streptococcus pyogenes serotype M49 (strain NZ131) OX=471876 GN=tsf PE=3	YGSKAQLSDDVITAA	S	240	M P	yes	153.083	12307.5	10622.9	8033.39	9136.16	10130.7	2.6	245.6	215.2	156.6	177.4	198.1
487	5	A0A0H3BZL9	PTS system, fructose-specific IIABC component OS=Streptococcus pyogenes serotype M49 (strain NZ131) OX=471876 GN=fruA PE=4	YHAKNGKSETAVSTE	S	274	M P L	yes	11653.1	48346.1	85062.6	63111.1	90032.2	78455	378.1	1913.3	3212.3	2329.2	3405.7	2925
639	1	A0A0H3C2K4	Alkyl hydroperoxide reductase C OS=Streptococcus pyogenes serotype M49 (strain NZ131) OX=471876 GN=ahpC PE=3	YHDGKFITVTNEDVK	T	23	M P L	yes	2027.6	20950.9	15387	13553.6	15625.2	13283	49.7	358.3	288.4	242.5	277	240.1
4061	2	A0A0H3BZ03	R3H domain protein OS=Streptococcus pyogenes serotype M49 (strain NZ131) OX=471876 GN=Spy49_0209 PE=4	YHGKVLKSLQLLAQN	S	210	M P	yes	189.485	8842.09	4249.57	2921.64	3769.98	3977.73	16.8	1031.8	513.7	345.2	424.5	490.3
1200	2	A0A0H3C052	NADH oxidase OS=Streptococcus pyogenes serotype M49 (strain NZ131) OX=471876 GN=nox1 PE=4	YMESPVQSIDYDAKT	S	83	M P	yes	3637.85	37098.4	26991.6	22157.4	24444.9	19845.9	120	718.7	545.1	439.8	474.6	405.4
178	1	A0A0H3BZP2	Arsenate reductase OS=Streptococcus pyogenes serotype M49 (strain NZ131) OX=471876 GN=arsC PE=3	YMKEDGESVNPIEVK	S	131	M L	yes	57238.1	46825.6	46747.2	36951.2	43463.2	38630.4	104099	35760.8	34207.5	26747.5	31316.1	30618
1238	1	A0A0H3BWX7	Beta sliding clamp OS=Streptococcus pyogenes serotype M49 (strain NZ131) OX=471876 GN=dnaN PE=3	YPRLQEVSTENPLIL	S	130	M	yes	1107.9	20136.1	13193.5	11197.3	11649.4	10047.5	98.7	1789.6	1266.8	1037.6	1087.8	941.2
2285	1	A0A0H3BWH3	Putative calcium-transporting ATPase OS=Streptococcus pyogenes serotype M49 (strain NZ131) OX=471876 GN=pacL PE=4	YQNSNVTYGRGIGVI	Y	210	M	yes	8199.03	4802.77	7057.37	4930.98	8334.6	8074.09	1052.4	804.4	1113.5	753	1298	1266.1
1040	1	A0A0H3C1X8	Putative endopeptidase O OS=Streptococcus pyogenes serotype M49 (strain NZ131) OX=471876 GN=pepO PE=3	YQSLKSFSEFVANIA	S	100	M	yes	656.71	18049	11525.3	10038.4	10616	9449.06	35.4	1146.9	744	656.6	681.2	643.2
715	1	A0A0H3BZR7	Mid-cell-anchored protein Z OS=Streptococcus pyogenes serotype M49 (strain NZ131) OX=471876 GN=mapZ PE=3	YTELDTASLDNFIKK	S	75	M P L	yes	1485.71	33682.4	21258.9	18653.3	18189.6	16175.4	318.3	10418.6	6858.9	5909.1	5907.4	5449.6
2822	1	B5XJ63	50S ribosomal protein L17 OS=Streptococcus pyogenes serotype M49 (strain NZ131) OX=471876 GN=rplQ PE=3	YVRNEIASENYDEAA	S	72	M P L	yes	1645.23	6322.58	7597.68	6028.09	7580.14	6617.72	28.9	146.9	170.2	131	163.7	147.5
1488	3	A0A0H3BZD6	Putative PTS system enzyme II OS=Streptococcus pyogenes serotype M49 (strain NZ131) OX=471876 GN=Spy49_1737c PE=4	AAKSAAKSNQNALQR	S	97	M L	no	3199.75	7110.16	73117.5	39039.1	76802.9	68678.4	650.6	749.5	7459.1	4023.2	7765	7064.8
45	1	A0A0H3BYM9	Glyceraldehyde-3-phosphate dehydrogenase OS=Streptococcus pyogenes serotype M49 (strain NZ131) OX=471876 GN=plr PE=3	AANIVPNSTGAAKAI	S	211	M L	no	100243	254896	255633	191308	234962	198398	810.5	2046.1	2124.9	1614.4	1785.8	1631.3
340	4	A0A0H3BYL1	Pyruvate kinase OS=Streptococcus pyogenes serotype M49 (strain NZ131) OX=471876 GN=pyk PE=3	ADDAKEFSYVTGEKI	S	107	M P L	no	4818.49	53888.8	45565.9	34278.4	41807.6	36896.1	35.3	503.9	441.7	305	378.7	344.3
306	2	A0A0H3BWF1	Protein translocase subunit SecY OS=Streptococcus pyogenes serotype M49 (strain NZ131) OX=471876 GN=secY PE=3	AENLQKNSSYIPSVR	S	345	M L	no	5796.09	77881.7	105737	46265.1	95402.8	78691.8	580.9	6279.8	8534.4	3633.5	7480.4	6232.7
2590	2	A0A0H3BZ23	Cell division protein FtsZ OS=Streptococcus pyogenes serotype M49 (strain NZ131) OX=471876 GN=ftsZ PE=3	AFSFDTASIQGAIIK	S	9	M P	no	25159.2	11090.7	6686.77	5049.16	5884.36	6006.75	938.6	420.9	257.3	186.2	223.1	228.2
1741	1	A0A0H3BZS5	Putative amino acid ABC transproter OS=Streptococcus pyogenes serotype M49 (strain NZ131) OX=471876 GN=Spy49_1287c PE=3	AKSLGMTSVQVYRRG	S	165	M L	no	366	10502.6	8358.6	6826	8019.7	6703.3	366	10502.6	8358.6	6826	8019.7	6703.3
1863	2	A0A0H3BYW2	EIICB-Lac OS=Streptococcus pyogenes serotype M49 (strain NZ131) OX=471876 GN=lacE PE=4	AKTEGAQYIKLTRDG	Y	545	P	no	6206.71	9367.55	6096.68	5779.37	6360.29	5173.08	1619.6	1091.3	677.9	612.5	713.6	566.7
2362	1	A0A0H3BZL3	Conserved hypothetical integral membrane protein OS=Streptococcus pyogenes serotype M49 (strain NZ131) OX=471876 GN=Spy49_1194c PE=4	ALDTGIASVVRKNKG	S	45	M P	no	292.892	6732.47	3715.5	3226.14	4113.21	2370.5	125.2	737.5	421.8	342.7	455.4	250.9
4048	1	B5XK03	Initiation-control protein YabA OS=Streptococcus pyogenes serotype M49 (strain NZ131) OX=471876 GN=Spy49_0329 PE=3	AMKKQVQSLVEENTI	S	33	M	no	421.9	5334.2	3176.5	2625.2	2718.8	2349.5	421.9	5334.2	3176.5	2625.2	2718.8	2349.5
7364	2	B5XK62	50S ribosomal protein L1 OS=Streptococcus pyogenes serotype M49 (strain NZ131) OX=471876 GN=rplA PE=3	AMVLPNGTGKTQRVL	T	69	P	no	743.799	2325.64	2963.02	1365.26	2817.97	2204.2	14.5	55.9	70.2	32.7	67.1	52.9
924	2	A0A0H3BZZ0	CRISPR-associated endonuclease Cas9 OS=Streptococcus pyogenes serotype M49 (strain NZ131) OX=471876 GN=cas9 PE=3	ANLDKVLSAYNKHRD	S	1292	M	no	1866.52	16120.4	13878.3	12991.1	13623.1	11393.8	7607.7	38241.3	33813.5	30891	29111.9	25893.2
2046	2	A0A0H3C0D5	Dihydrolipoamide acetyltransferase component of pyruvate dehydrogenase complex OS=Streptococcus pyogenes serotype M49 (strain NZ131) OX=471876 GN=acoC PE=3	APKENVASPAPQVAA	S	115	P	no	904.896	18208.4	22853.2	11833.9	20419.3	17589.9	83	1490.2	1908.7	943.3	1625.9	1433.7
2964	2	A0A0H3BXF9	Putative ABC transporter OS=Streptococcus pyogenes serotype M49 (strain NZ131) OX=471876 GN=atmD PE=4	AQLKYAGTSTDEPLL	T	286	M	no	316.488	11947.1	6975.38	7408.76	6677.41	5756.93	145	4513.6	2757.8	2747	2471.4	2161.7
853	1	A0A0H3BYL1	Pyruvate kinase OS=Streptococcus pyogenes serotype M49 (strain NZ131) OX=471876 GN=pyk PE=3	ATTQGIQSTRDVIAL	S	124	M P	no	7780.57	26457.8	28812.6	21016.6	28581.9	24293.8	57	247.4	279.3	187	258.9	226.7
8821	2	A0A0H3BYF0	Putative ATP-dependent Clp proteinase OS=Streptococcus pyogenes serotype M49 (strain NZ131) OX=471876 GN=clpL PE=4	AVSKLIGTTAGYVGY	T	496	P	no	95.8977	6247.5	4174.78	3079.87	3439.91	3134.44	6.8	361.2	250.9	182.9	200.8	193
2270	1	A0A0H3BYA0	PTS system, IIB component, putative OS=Streptococcus pyogenes serotype M49 (strain NZ131) OX=471876 GN=Spy49_1328c PE=4	DAIETQMSDRGYDVH	S	27	P	no	1424.95	11099.3	11520.3	9555.06	11091.7	9408.29	377.9	700.3	708.4	621.5	704.2	624.6
6951	2	A0A0H3BXC6	Signal recognition particle receptor FtsY OS=Streptococcus pyogenes serotype M49 (strain NZ131) OX=471876 GN=ftsY PE=3	DDIGEFHSEDFMKGL	S	504	P	no	876.203	5244.38	3547.41	2322.07	3210.78	2573.48	118.5	889.6	583.8	382.2	540.7	424.8
17242	2	A0A0H3BZZ3	Teichoic acid export ATP-binding protein tagH OS=Streptococcus pyogenes serotype M49 (strain NZ131) OX=471876 GN=rgpDc PE=3	DDLSALDSASGLYQR	S	387	P	no	255.257	2708.39	2066.48	1609.04	1772.2	1659.28	208.7	2184.3	1619.1	1341.3	1390.9	1339.9
1896	2	A0A0H3C120	Uncharacterized protein OS=Streptococcus pyogenes serotype M49 (strain NZ131) OX=471876 GN=Spy49_1351c PE=3	DENALENSIGFNSKM	S	325	M	no	552.3	23697.8	20081.9	16174.8	17986.5	19828.1	552.3	23697.8	20081.9	16174.8	17986.5	19828.1
7833	1	B5XJ39	50S ribosomal protein L2 OS=Streptococcus pyogenes serotype M49 (strain NZ131) OX=471876 GN=rplB PE=3	DFAEITTSTPEKSLL	S	27	P	no	312.506	2486.2	2102.72	1329.57	1907.99	1752.98	4.1	42.4	36.2	21.3	30.4	28.1
10757	2	A0A0H3BZI7	Putative ATP-dependent protease OS=Streptococcus pyogenes serotype M49 (strain NZ131) OX=471876 GN=clpE PE=3	DLKEKEQSQLVNLAN	S	446	P	no	186.128	3642.37	2877.42	1894.12	2453	2530.76	21.1	389.6	339.3	222.3	282.4	284.3
711	2	A0A0H3BZE8	Universal stress protein OS=Streptococcus pyogenes serotype M49 (strain NZ131) OX=471876 GN=Spy49_1389 PE=3	DLLVVRDSTKTL---	S	146	M	no	1918.82	29138.7	23025.2	12850.6	18844.9	19623.4	166.8	1239.2	969.5	543	789.8	832.9
29715	1	A0A0H3C1H6	Cysteine synthase OS=Streptococcus pyogenes serotype M49 (strain NZ131) OX=471876 GN=cysM PE=3	DQIIRVKSKDALETA	S	246	P	no	8.5425	239.195	952.775	228.168	834.872	551.296	0.2	5.2	20.1	4.8	17.6	11.7
1165	1	A0A0H3BXI0	Uncharacterized protein OS=Streptococcus pyogenes serotype M49 (strain NZ131) OX=471876 GN=Spy49_1001c PE=3	DRVTSAASSTSQFVS	S	134	M P L	no	3792.18	23661.7	29353.1	10863.9	19139.3	12358.9	139.3	728.8	881.7	320.9	577.5	387.6
2574	2	B5XIF1	Phosphoglycerate kinase OS=Streptococcus pyogenes serotype M49 (strain NZ131) OX=471876 GN=pgk PE=3	DVDGKKESKNDEELG	S	129	P	no	430.742	375.677	31253.5	17416.4	36725.9	30264	5.7	6.7	567.4	309.2	650.9	545.8
12266	2	B5XKP9	ATP synthase subunit alpha OS=Streptococcus pyogenes serotype M49 (strain NZ131) OX=471876 GN=atpA PE=3	EAFTQFGSDLDAATQ	S	400	P	no	212.717	2646.16	2284.73	1815.91	1882.3	2399.16	11.4	152.9	136.1	108.5	107.9	140.4
548	1	A0A0H3BWH3	Putative calcium-transporting ATPase OS=Streptococcus pyogenes serotype M49 (strain NZ131) OX=471876 GN=pacL PE=4	EALKSMSSPLARIRR	S	122	M L	no	1973.41	26892.3	25648.6	23699.5	25031.4	20221.9	253.3	4504.1	4046.8	3619.1	3898.3	3171
70	4	A0A0H3BYW2	EIICB-Lac OS=Streptococcus pyogenes serotype M49 (strain NZ131) OX=471876 GN=lacE PE=4	EEAAGTNSSDALKEK	S	427	M P L	no	27952.4	467425	516492	295770	452656	434989	7294	54454	57429.6	31345.8	50786.3	47652.1
5187	1	B5XLI8	Peptide chain release factor 1 OS=Streptococcus pyogenes serotype M49 (strain NZ131) OX=471876 GN=prfA PE=3	EELGELLSDPDVVSD	S	22	P	no	194.116	4500.43	2452.84	2772.9	2524.9	2479.78	28.6	787	436.1	491.5	424.7	452.8
1758	3	B5XHZ0	Chaperone protein DnaK OS=Streptococcus pyogenes serotype M49 (strain NZ131) OX=471876 GN=dnaK PE=3	EGAQANDSANNDDVV	S	594	M P	no	1043.49	38368.2	50797	36127.8	48683.9	44188.5	9.8	361.7	502.4	346.3	454	441.4
1189	2	B5XKV2	50S ribosomal protein L21 OS=Streptococcus pyogenes serotype M49 (strain NZ131) OX=471876 GN=rplU PE=3	EGATVVGTVEKQGKQ	T	63	P	no	373.705	16246.7	13340.3	9262.65	11441.6	10753.4	10.6	594.8	453.1	320.4	395.7	372.4
839	2	A0A0H3C2S7	Uncharacterized protein OS=Streptococcus pyogenes serotype M49 (strain NZ131) OX=471876 GN=Spy49_1801c PE=4	EKLLSHQSMGYGQPL	S	110	P L	no	31236.6	19945.7	15886.3	10937.9	16029.1	12489.4	8080.2	5657.9	4361.5	2922	4121.8	3339.9
42	1	B5XMC3	Arginine deiminase OS=Streptococcus pyogenes serotype M49 (strain NZ131) OX=471876 GN=arcA PE=3	ELPEIPASEKGLTDL	S	139	P L	no	36281.2	432839	449684	319285	420222	363980	1076.3	3611.1	3973.5	2624.1	3474.1	3017.7
12963	1	A0A0H3BY96	Phosphate acetyltransferase OS=Streptococcus pyogenes serotype M49 (strain NZ131) OX=471876 GN=pta PE=3	EPIILGQSEEVRNLL	S	52	P	no	2.12087	1949.64	1117.64	982.041	1256.97	1306.22	0.1	60.2	37.5	30.9	38.7	43.6
1562	1	A0A0H3BZQ5	SSU ribosomal protein S1p OS=Streptococcus pyogenes serotype M49 (strain NZ131) OX=471876 GN=rpsA PE=4	ERNVSPKSVVSVGEE	S	235	P	no	3838.49	15177.8	14902.3	10386.5	13131.7	12982.2	72.4	294.3	279.2	194.2	250.1	241.5
2308	1	A0A0H3BVR1	Amino acid ABC transporter, ATP-binding protein OS=Streptococcus pyogenes serotype M49 (strain NZ131) OX=471876 GN=Spy49_0236c PE=4	EVISIIGSSGSGKST	S	39	P	no	690.497	8428.27	7506.4	4990.54	6630.82	6135.28	323.6	6776.5	5739	3787.2	5075	4979.2
338	1	B5XIG1	Trigger factor OS=Streptococcus pyogenes serotype M49 (strain NZ131) OX=471876 GN=tig PE=3	EVITSTASVK-----	S	425	M P L	no	2142.97	31733.9	36965.8	21924.7	32486.4	26990.8	60.9	1118.8	1232	733.4	1061.9	928.8
2774	2	A0A0H3BX54	Xaa-His dipeptidase OS=Streptococcus pyogenes serotype M49 (strain NZ131) OX=471876 GN=Spy49_0844 PE=4	EVTIIGKSAHGSTPE	S	269	P	no	476.089	4988.65	5995.69	2366.9	4958.57	4002.16	30.7	262.3	338.4	130.4	274.1	228.5
879	1	A0A0H3BYL1	Pyruvate kinase OS=Streptococcus pyogenes serotype M49 (strain NZ131) OX=471876 GN=pyk PE=3	EYGRLDSSAFPRTNK	S	376	M	no	3876.63	17528	16908	14396.9	16327.8	13309.6	28.4	163.9	163.9	128.1	147.9	124.2
1121	1	A0A0H3BZ43	Uncharacterized protein OS=Streptococcus pyogenes serotype M49 (strain NZ131) OX=471876 GN=Spy49_1003c PE=3	EYQKHVPTIYDSIKS	T	92	P	no	719.643	25494.3	15967.5	8804.84	13175.3	10181.8	29	941.8	592.5	319.3	476.1	382.6
19294	1	A0A0H3BZC7	EIIAB-Man OS=Streptococcus pyogenes serotype M49 (strain NZ131) OX=471876 GN=manL PE=4	FAEGIHQSGSMIFGE	S	20	P	no	71.9975	1106.87	558.787	412.544	542.986	499.204	2.4	41.2	19.2	13.8	17.9	16.9
1698	1	B5XLJ8	L-lactate dehydrogenase OS=Streptococcus pyogenes serotype M49 (strain NZ131) OX=471876 GN=ldh PE=3	FAKEEFASAAKN---	S	323	M P	no	5861.66	17119.2	16019.3	14074.5	14856.5	13693.1	68.1	241.9	221.4	192.3	203.9	193.2
1384	2	B5XLV6	ATP-dependent 6-phosphofructokinase OS=Streptococcus pyogenes serotype M49 (strain NZ131) OX=471876 GN=pfkA PE=3	FDIEKVASTIQYDFE	S	203	M P	no	2630.07	20993.8	15041.1	10130.5	14962.4	12204.1	66.6	694.3	505.4	327	481.8	400.1
1907	1	A0A0H3BWQ8	Ribulose-phosphate 3-epimerase OS=Streptococcus pyogenes serotype M49 (strain NZ131) OX=471876 GN=rpe PE=3	FKASDLVSQVQTLRT	S	209	M	no	503.221	10827	7433.47	5687	6280.75	5685.38	659.5	5796.5	4203.4	3232.1	3480.2	3105.2
3052	1	A0A0H3BZS5	Putative amino acid ABC transproter OS=Streptococcus pyogenes serotype M49 (strain NZ131) OX=471876 GN=Spy49_1287c PE=3	GEIEAAKSLGMTSVQ	S	160	M L	no	107	5881.3	4785.8	4045.9	4098.8	3582.5	107	5881.3	4785.8	4045.9	4098.8	3582.5
1992	1	A0A0H3BZ00	Collagen-like surface protein OS=Streptococcus pyogenes serotype M49 (strain NZ131) OX=471876 GN=sclA PE=4	GEKAPEKSPEVTPTP	S	284	M P	no	13.6076	1158.68	8689.99	9791.24	17864.8	24758.6	1.8	90.8	472.3	503.6	954.7	1343.8
3719	2	B5XJR1	Elongation factor G OS=Streptococcus pyogenes serotype M49 (strain NZ131) OX=471876 GN=fusA PE=3	GETHEGASQMDWMEQ	S	48	P	no	1858.23	8633.88	10014.7	3510.45	6522.58	6310.58	20.6	104.3	123.7	41.2	76.2	74
2128	1	A0A0H3C005	Succinate-semialdehyde dehydrogenase NADP OS=Streptococcus pyogenes serotype M49 (strain NZ131) OX=471876 GN=Spy49_0841 PE=4	GSERGGASIAEEAGK	S	214	M P	no	4622.57	15208.4	17153.6	11727.4	15604.2	14151	3953.2	2995.9	3827.1	2602.6	3374.3	3072.2
1845	2	B5XJ09	DNA mismatch repair protein MutL OS=Streptococcus pyogenes serotype M49 (strain NZ131) OX=471876 GN=mutL PE=3	HATSKIKSQSDLFRI	S	83	M	no	1594.19	4029.11	15979.8	9095.05	14542.2	11542.5	1289.6	2618	10664.6	5979.7	9117.1	7969.7
1007	2	B5XJR1	Elongation factor G OS=Streptococcus pyogenes serotype M49 (strain NZ131) OX=471876 GN=fusA PE=3	HDVDSSETAFKIAAS	T	578	P L	no	3518	22408.4	26295.7	12107.7	25140.2	20321.8	39	270.7	324.8	142.1	293.7	238.3
986	1	B5XJ13	Phosphate acyltransferase OS=Streptococcus pyogenes serotype M49 (strain NZ131) OX=471876 GN=plsX PE=3	HTDEKIMSDDEPAKA	S	64	M	no	2547.29	14868	12599	12792.1	12598.4	11415.8	514.7	2943.7	2527.3	2512.6	2555.4	2357.6
1892	2	B5XJ51	50S ribosomal protein L6 OS=Streptococcus pyogenes serotype M49 (strain NZ131) OX=471876 GN=rplF PE=3	IEIKVEGTEITVVRP	T	48	P	no	997.17	10442.2	13193.4	5638.52	11664.3	9142.29	17.2	236.1	286.2	124.6	237.8	216.9
996	2	A0A0H3BZI8	Putative glycosyl transferase OS=Streptococcus pyogenes serotype M49 (strain NZ131) OX=471876 GN=Spy49_0620 PE=4	IIPAYNESSNIVNTI	S	13	M	no	608.318	30241.9	22099.2	15868.4	18305.6	23149.6	1472.7	56461.4	35911.6	25564.9	30163.1	35580.4
61	3	A0A0H3BZL9	PTS system, fructose-specific IIABC component OS=Streptococcus pyogenes serotype M49 (strain NZ131) OX=471876 GN=fruA PE=4	IMTREEQTSTGLGDG	T	55	M P L	no	82295.8	222974	306401	140366	270718	215500	2670.2	8824.2	11570.9	5180.4	10240.6	8034.4
846	1	B5XJ57	Adenylate kinase OS=Streptococcus pyogenes serotype M49 (strain NZ131) OX=471876 GN=adk PE=3	INIKVDPSCLVERLS	S	119	M L	no	2300.69	19961.4	17518.1	14562.2	15599	13038.4	167.3	1513.9	1376.7	1117.8	1161.5	1012.9
631	1	A0A0H3BZJ0	Formate acetyltransferase OS=Streptococcus pyogenes serotype M49 (strain NZ131) OX=471876 GN=pfl PE=3	ISLTTQVSPRALGKT	S	682	M P	no	216.233	28281.4	18624.8	9221.01	14316.7	17031.2	9.3	370.3	245.8	119.1	182.9	223.5
142	2	B5XIW7	Chaperonin GroEL OS=Streptococcus pyogenes serotype M49 (strain NZ131) OX=471876 GN=groEL PE=3	IVEGSGSSEAIANRI	S	337	M P L	no	7636.38	116189	161119	85457.2	156751	135131	53.3	800.4	1178.7	627	1110.7	984.4
4793	2	B5XJY9	Probable manganese-dependent inorganic pyrophosphatase OS=Streptococcus pyogenes serotype M49 (strain NZ131) OX=471876 GN=ppaC PE=3	KAGTNLASKSEVELI	S	195	P	no	124.017	5199.72	4708.65	1889.2	3159.81	2917.24	4.4	190.3	172.7	68.7	113.2	106.3
4504	3	A0A0H3BZJ0	Formate acetyltransferase OS=Streptococcus pyogenes serotype M49 (strain NZ131) OX=471876 GN=pfl PE=3	KAYDALYSGDPTFIT	S	323	M P	no	367.363	11196.5	7531.76	6395.09	7248.39	6698.19	15.8	146.6	99.4	82.6	92.6	87.9
13177	1	A0A0H3BYB9	Tagatose-6-phosphate kinase OS=Streptococcus pyogenes serotype M49 (strain NZ131) OX=471876 GN=fruK PE=3	KIKSQEETELNGQGP	T	99	M	no	12.5565	1659.12	1140.55	850.44	1072.21	1090.53	1.9	289.9	183.9	141.6	180.3	185.4
935	4	B5XIY6	Elongation factor Ts OS=Streptococcus pyogenes serotype M49 (strain NZ131) OX=471876 GN=tsf PE=3	KKANDFESEVAATMA	S	334	M P	no	624.107	10693.9	20302.9	16523.3	17906.7	18394.7	10.6	213.4	411.3	322.1	347.7	359.7
1387	3	A0A0H3C114	Inosine-5'-monophosphate dehydrogenase OS=Streptococcus pyogenes serotype M49 (strain NZ131) OX=471876 GN=guaB PE=3	KKGSSDRYFQGSVNE	Y	407	M P L	no	3134.47	22800.4	33170.1	15753.8	29882.4	26190.6	109.8	962.6	1406.1	665.4	1215.5	1089.9
1103	2	A0A0H3BZH8	ABC transporter ATP-binding protein OS=Streptococcus pyogenes serotype M49 (strain NZ131) OX=471876 GN=Spy49_1815 PE=4	KKSVNVLSGGEKVRV	S	440	M P	no	1344.63	12262.9	10694.6	9348.17	9733.54	9124.46	98	1047.5	914.9	804.2	822	785.6
1667	2	A0A0H3BVD7	Aldehyde-alcohol dehydrogenase OS=Streptococcus pyogenes serotype M49 (strain NZ131) OX=471876 GN=adhE PE=3	KLLGLPASTPEEAVE	S	796	M P	no	614.608	20823.3	12057.5	10792.3	10276.6	10473	19.4	502.1	289.7	272.4	230.4	257.8
1254	2	A0A0H3BWD2	ATP-dependent zinc metalloprotease FtsH OS=Streptococcus pyogenes serotype M49 (strain NZ131) OX=471876 GN=ftsH PE=3	KNPKKYKSLGARIPA	S	214	M L	no	4355.16	4514.03	32271.7	21378	32497	27217.8	365.8	455.8	3127.3	2098.9	3187.8	2659.3
598	2	A0A0H3BWF1	Protein translocase subunit SecY OS=Streptococcus pyogenes serotype M49 (strain NZ131) OX=471876 GN=secY PE=3	KNSSYIPSVRPGRET	S	350	M L	no	7321.69	84995.4	100566	46713.3	89876.7	72641.6	733.8	6853.4	8117	3668.7	7047.1	5753.5
433	1	A0A0H3C2S7	Uncharacterized protein OS=Streptococcus pyogenes serotype M49 (strain NZ131) OX=471876 GN=Spy49_1801c PE=4	KSPLKTISPVSQFKS	S	145	M L	no	2601.7	28002.7	23298.6	19986.6	22445.8	18232.4	673	7943.4	6396.5	5339.3	5771.8	4875.7
2797	2	A0A0H3BZW4	Streptolysin S export ATP-binding protein (SagG) OS=Streptococcus pyogenes serotype M49 (strain NZ131) OX=471876 GN=sagG PE=4	LADKPDWSLIEDGEK	S	252	M	no	487.057	17600.1	8253.53	5291.29	8189.51	7391.57	319.8	2827.8	1406.5	865.8	1371.2	1208.5
533	1	B5XIW7	Chaperonin GroEL OS=Streptococcus pyogenes serotype M49 (strain NZ131) OX=471876 GN=groEL PE=3	LIKSQLETTTSDFDR	T	353	M P	no	3252.26	34795.7	33284.4	24124.3	29439.4	25340.5	22.7	239.7	243.5	177	208.6	184.6
1728	1	B5XHZ8	Aspartyl/glutamyl-tRNA(Asn/Gln) amidotransferase subunit B OS=Streptococcus pyogenes serotype M49 (strain NZ131) OX=471876 GN=gatB PE=3	LKNLNSFSNVRKGLE	S	220	P	no	1871.28	11739.6	9985.46	8534.1	9249.33	8112.27	234.1	1417.4	1195.9	1029.4	1112.6	978.9
3102	2	B5XM83	Exodeoxyribonuclease 7 large subunit OS=Streptococcus pyogenes serotype M49 (strain NZ131) OX=471876 GN=xseA PE=3	LLMANMASQYDSQLA	S	374	M	no	297.763	7811.29	5402.28	5263.16	5752.9	4484.32	97.3	2608.8	1791.6	1693.6	1794.4	1454.5
4057	3	A0A0H3C114	Inosine-5'-monophosphate dehydrogenase OS=Streptococcus pyogenes serotype M49 (strain NZ131) OX=471876 GN=guaB PE=3	LMQRYRISGVPIVET	S	123	P	no	179.847	19823	11129.8	9134.11	10079.6	9124.28	6.3	836.9	471.8	385.8	410	379.7
748	1	B5XJD9	Acetate kinase OS=Streptococcus pyogenes serotype M49 (strain NZ131) OX=471876 GN=ackA PE=3	LNKKSGLSGVSGISS	S	275	M P	no	2678.13	20320.4	17928.7	13832.4	15170	13585.5	110.6	572.2	466.9	339.4	382.6	344.7
2357	1	A0A0H3BZI7	Putative ATP-dependent protease OS=Streptococcus pyogenes serotype M49 (strain NZ131) OX=471876 GN=clpE PE=3	LRALMTNSENITIKA	S	739	P	no	694.23	7858.77	6478.22	4562.77	5739.01	5479.9	78.7	840.6	763.9	535.5	660.7	615.6
3520	2	B5XKM2	50S ribosomal protein L19 OS=Streptococcus pyogenes serotype M49 (strain NZ131) OX=471876 GN=rplS PE=3	LTEGQLRSDVPNFRP	S	15	P	no	3210.62	12032.7	14030.5	6802.17	12191	10483.3	88.6	374.7	416.6	197.8	361	321.7
5279	2	A0A0H3BZJ0	Formate acetyltransferase OS=Streptococcus pyogenes serotype M49 (strain NZ131) OX=471876 GN=pfl PE=3	LTGLNGGYDDVHRDY	Y	450	P	no	202.282	6079.4	5122.21	2988.5	4587	3855.84	8.7	79.6	67.6	38.6	58.6	50.6
1731	2	B5XJY9	Probable manganese-dependent inorganic pyrophosphatase OS=Streptococcus pyogenes serotype M49 (strain NZ131) OX=471876 GN=ppaC PE=3	MALLKAGTNLASKSE	T	191	P L	no	1135.88	12814.9	10317	5227.61	8053.04	8051.9	40.3	469	378.4	190.1	288.5	293.4
3971	2	B5XIY5	30S ribosomal protein S2 OS=Streptococcus pyogenes serotype M49 (strain NZ131) OX=471876 GN=rpsB PE=3	---MAVISMKQLLEC	S	5	M	no	146.994	5028.8	4030.46	4058.95	4331.86	3145.59	2.3	87.6	70.6	68.6	71.6	54
1056	6	A0A0H3BYP3	Oligopeptide transport system permease protein oppC OS=Streptococcus pyogenes serotype M49 (strain NZ131) OX=471876 GN=oppC PE=3	-MESIDKSKFRFVER	S	7	M L	no	4375.74	13193.9	66482.2	40833.9	73990.8	62832.9	7004.5	11816.6	61483.9	36607.6	63851.4	54252.1
426	1	B5XJ48	50S ribosomal protein L5 OS=Streptococcus pyogenes serotype M49 (strain NZ131) OX=471876 GN=rplE PE=3	MGVGDAVSNAKNLEK	S	46	M P	no	3542	30405.4	35025	22912.6	28457.6	30742.5	36.4	404	471.5	298.8	368.5	403.4
1942	1	A0A0H3BZ18	Cell-division initiation protein OS=Streptococcus pyogenes serotype M49 (strain NZ131) OX=471876 GN=divIVA PE=4	MKESLSQSVILAQET	S	70	P	no	634.596	10888.1	10914.3	6933.9	9746.17	8392.65	35.4	656.9	648.9	411.4	574.9	507.1
3030	2	A0A0H3BZJ0	Formate acetyltransferase OS=Streptococcus pyogenes serotype M49 (strain NZ131) OX=471876 GN=pfl PE=3	MKMSHKHSSIQYEGV	S	390	P	no	3127.24	13182.2	19518.9	7842.89	18473.2	15248.1	134.5	172.6	257.6	101.3	236	200.1
9285	2	A0A0H3BYF0	Putative ATP-dependent Clp proteinase OS=Streptococcus pyogenes serotype M49 (strain NZ131) OX=471876 GN=clpL PE=4	MLTPKADSVLTQLGT	S	74	P	no	38.077	3173.91	2023.33	1584.56	1713.1	1672.79	2.7	183.5	121.6	94.1	100	103
769	2	A0A0H3BXF8	Putative sugar ABC transporter OS=Streptococcus pyogenes serotype M49 (strain NZ131) OX=471876 GN=Spy49_0973c PE=4	MMVGRSVSFTTSKKA	S	243	M L	no	3225.05	17997.5	16581.4	15989.6	15727.7	14192.1	266.6	1393.6	1253.4	1185.3	1184.6	1111.1
4700	3	A0A0H3BYN6	Ribose-phosphate pyrophosphokinase OS=Streptococcus pyogenes serotype M49 (strain NZ131) OX=471876 GN=prsA PE=3	MNIIGNVSGKKCILI	S	216	P	no	5617.93	16526.1	11507.1	8668.18	10632.7	10124.2	514.1	1097.9	744.2	542.5	674.7	634.5
2757	1	B5XJM0	Glucose-6-phosphate isomerase OS=Streptococcus pyogenes serotype M49 (strain NZ131) OX=471876 GN=pgi PE=3	------MSHITFDYS	S	2	M	no	5046.26	15541.3	20433.8	9381.01	15794.5	13123.9	146.6	498.2	654.9	295.5	489.2	404
1903	2	B5XJD9	Acetate kinase OS=Streptococcus pyogenes serotype M49 (strain NZ131) OX=471876 GN=ackA PE=3	------MSKTIAINA	S	2	M	no	1823.36	9006.05	12936.8	5045.53	10860.1	9194.91	75.3	253.6	336.9	123.8	273.9	233.3
7708	2	A0A0H3BYE2	Putative glutamyl-aminopeptidase OS=Streptococcus pyogenes serotype M49 (strain NZ131) OX=471876 GN=pepA PE=3	--MTDLFSKIKEVTE	S	6	M	no	69.003	2111.38	1666.2	1719.91	1531.43	1366.54	26.7	842.4	681.3	660	613.9	508.7
577	2	B5XKM7	Enolase OS=Streptococcus pyogenes serotype M49 (strain NZ131) OX=471876 GN=eno PE=3	MVPSGASTGEHEAVE	T	43	M P	no	3062.34	20455.8	20417.3	11250.9	18846.2	15770.3	18.4	132.9	133.7	71.6	119.9	101
11477	2	A0A0H3BXS5	Protein-export membrane protein SecG OS=Streptococcus pyogenes serotype M49 (strain NZ131) OX=471876 GN=Spy49_0421 PE=3	NVFDSSGSEALFERT	S	38	M P L	no	863.814	23365.5	17570.5	13691.9	15716	13032.6	119.2	3384.5	2381.6	1846.7	2088.3	1793.8
1101	3	A0A0H3C190	Transcriptional regulator, biotin repressor family OS=Streptococcus pyogenes serotype M49 (strain NZ131) OX=471876 GN=Spy49_1142c PE=4	PLNIKTHSDVTNFMS	S	119	M L	no	4751.76	22445.2	25255.4	13920.4	23637.1	19026.4	4531.6	23862.3	27259.1	14333.1	24476.1	20619.7
985	1	A0A0H3BXH0	Endolytic murein transglycosylase OS=Streptococcus pyogenes serotype M49 (strain NZ131) OX=471876 GN=mltG PE=3	QETASKESQVPLTIE	S	127	P	no	31326.1	17741.5	15075.4	9619.96	10997.9	10554.9	8099.8	7061.4	6073.9	3635.5	4154.1	4190.5
2079	1	A0A0H3BZL6	Beta-glucoside permease IIABC component OS=Streptococcus pyogenes serotype M49 (strain NZ131) OX=471876 GN=Spy49_0485 PE=4	QGFEQLVSVGDVVKR	S	560	M	no	973.019	11106.4	5995.5	4966.29	5140.32	5779.57	3894.8	30841.3	17251.6	15221.2	15652.1	17839.1
2165	1	A0A0H3BZ40	Oligopeptide transport ATP-binding protein oppD OS=Streptococcus pyogenes serotype M49 (strain NZ131) OX=471876 GN=oppD PE=3	QKILRKMSQQEEGNV	S	349	M	no	4777.91	14410.6	15408.3	11976	15931.2	13455.2	1493.2	3286.6	3546.3	2776.3	3750.7	3031.3
4010	2	A0A0H3BYT6	Non-phosphorylating glyceraldehyde-3-phosphate dehydrogenase (NADP) OS=Streptococcus pyogenes serotype M49 (strain NZ131) OX=471876 GN=gapN PE=4	QLAAEIKTLVEKLSV	T	306	P	no	190.892	6644.38	3614.12	2408.97	3334.96	3664.2	6.1	181.1	101.7	66.8	95.9	101.7
387	2	A0A0H3BY81	Putative L-malate permease OS=Streptococcus pyogenes serotype M49 (strain NZ131) OX=471876 GN=malP PE=3	QLVKIGHSEDMSDAL	S	253	M L	no	5540.23	43792.4	46298.9	29879.8	45331.4	37833.4	5337.7	13268.2	13849.4	8834.8	13621	11621.2
4540	2	A0A0H3BY83	Transketolase OS=Streptococcus pyogenes serotype M49 (strain NZ131) OX=471876 GN=tkt PE=3	QNIFDEQSAEYKESI	S	592	P	no	341.726	8109.25	5392.9	4779.87	5276.09	4338.75	22.1	408.8	275.7	241.5	256.5	223.2
2369	2	A0A0H3BZ23	Cell division protein FtsZ OS=Streptococcus pyogenes serotype M49 (strain NZ131) OX=471876 GN=ftsZ PE=3	QPRTFTQTNAQQVAG	T	336	P	no	11847.8	8115.77	11006	5718.94	10165.1	8638.99	442	308	423.5	210.9	385.4	328.2
7621	2	B5XMJ7	Cell cycle protein GpsB OS=Streptococcus pyogenes serotype M49 (strain NZ131) OX=471876 GN=gpsB PE=3	QQPVPQPTRVAQSAT	T	79	P	no	9115.48	2101.64	1793.71	990.602	1385.97	1138.14	1007.1	341.8	295.4	163.7	229.8	195.3
4340	2	A0A0H3BZ23	Cell division protein FtsZ OS=Streptococcus pyogenes serotype M49 (strain NZ131) OX=471876 GN=ftsZ PE=3	QQVAGAQYASDQAKQ	Y	346	P	no	1404.58	3349.07	7276.71	3037.09	6185.04	5743.53	52.4	127.1	280	112	234.5	218.2
1211	1	B5XM69	2,3-bisphosphoglycerate-dependent phosphoglycerate mutase OS=Streptococcus pyogenes serotype M49 (strain NZ131) OX=471876 GN=gpmA PE=3	QVHIWRRSYDVLPPA	S	116	P	no	2878.77	44401.4	41327.8	37293.1	43294.8	34454.2	46.9	854.7	799.7	680.3	800.1	645
728	2	B5XKQ0	ATP synthase gamma chain OS=Streptococcus pyogenes serotype M49 (strain NZ131) OX=471876 GN=atpG PE=3	RDFQIYASKIRQITT	S	48	M L	no	3685.89	24695.8	22650.1	18305	20770.1	17598.1	816.5	5863.8	5038.8	4040.4	4595.7	3934.5
9019	2	A0A0H3BVD7	Aldehyde-alcohol dehydrogenase OS=Streptococcus pyogenes serotype M49 (strain NZ131) OX=471876 GN=adhE PE=3	RELAYLAYEDQCSPA	Y	844	P	no	1134.17	2347.33	3013.33	1945.31	3305.11	2815.27	35.8	56.6	72.4	49.1	74.1	69.3
3355	2	B5XJR0	30S ribosomal protein S7 OS=Streptococcus pyogenes serotype M49 (strain NZ131) OX=471876 GN=rpsG PE=3	RRVGGSNYQVPVEVR	Y	85	P	no	1122.59	5612.09	10438.1	3732.66	9074.98	7385.2	36.3	222.8	410.3	140.2	338.2	281.1
1222	2	A0A0H3BXI0	Uncharacterized protein OS=Streptococcus pyogenes serotype M49 (strain NZ131) OX=471876 GN=Spy49_1001c PE=3	RVTSAASSTSQFVSE	S	135	M P	no	4905.6	24414.9	29712.6	11364.9	19457.4	13251.7	180.2	752	892.5	335.7	587.1	415.6
5238	1	A0A0H3BYN8	Lipoate--protein ligase OS=Streptococcus pyogenes serotype M49 (strain NZ131) OX=471876 GN=Spy49_0812 PE=4	SAKEQFGSWDWTYGK	S	235	P	no	889.946	4120.13	4240.74	3271.82	3822.85	2816.18	121.8	485.1	496.5	391	429.7	322.7
3531	2	A0A0H3BZL3	Conserved hypothetical integral membrane protein OS=Streptococcus pyogenes serotype M49 (strain NZ131) OX=471876 GN=Spy49_1194c PE=4	SKIEEDPSKSLVADK	S	166	P	no	498.057	7125.92	12500.4	3260.98	10969.5	8992.59	212.9	780.6	1419.1	346.4	1214.5	951.8
103	2	A0A0H3C000	Putative phosphotransferase system (PTS), enzyme II component C OS=Streptococcus pyogenes serotype M49 (strain NZ131) OX=471876 GN=Spy49_0835 PE=4	SKQTTFDSKESEEED	S	234	M L	no	17001.7	181509	168585	116132	153997	133982	20958.5	61030	57380.6	39408.5	53793.6	46254.3
1324	1	B5XIX5	Imidazolonepropionase OS=Streptococcus pyogenes serotype M49 (strain NZ131) OX=471876 GN=hutI PE=3	STVRATRSASFDNLY	S	122	M P	no	432.268	13943	16265.5	10641.9	15434.6	13529	533.3	2323.5	2712.7	1735.9	2462.9	2176.9
427	2	A0A0H3BYW2	EIICB-Lac OS=Streptococcus pyogenes serotype M49 (strain NZ131) OX=471876 GN=lacE PE=4	TAKALTDSMNRSLPS	S	92	M L	no	8116.32	43235.1	44982.7	43920.4	46379.5	41550.8	2117.9	5036.8	5001.7	4654.7	5203.6	4551.8
9871	2	B5XKI2	Triosephosphate isomerase OS=Streptococcus pyogenes serotype M49 (strain NZ131) OX=471876 GN=tpiA PE=3	TGAFTGETSPKVLAE	T	79	P	no	40.799	3820.45	3394.72	2002.73	3023.37	2496.82	0.4	59.7	53.3	32	47.9	40.5
515	1	B5XKI1	Elongation factor Tu OS=Streptococcus pyogenes serotype M49 (strain NZ131) OX=471876 GN=tuf PE=3	TREHILLSRQVGVKH	S	126	M L	no	4977.92	44563.6	44593.5	27936.8	41123.2	33562.4	35.2	283.6	280.6	173.2	254.7	217.3
916	1	B5XJ77	Arginine--tRNA ligase OS=Streptococcus pyogenes serotype M49 (strain NZ131) OX=471876 GN=argS PE=3	TRILDDNSERDNRLV	S	532	P L	no	4167.24	26776.3	28600.9	18555.9	29374.6	23405.3	384	2415.5	2642.5	1834.2	2704	2241.9
811	1	A0A0H3BXI0	Uncharacterized protein OS=Streptococcus pyogenes serotype M49 (strain NZ131) OX=471876 GN=Spy49_1001c PE=3	TSAASSTSQFVSEQT	S	137	M P	no	4502.7	28788.1	38228.6	14703	24899.3	16229.8	165.4	886.7	1148.3	434.3	751.3	509
9691	1	B5XKM7	Enolase OS=Streptococcus pyogenes serotype M49 (strain NZ131) OX=471876 GN=eno PE=3	TSAEQVDYLEELVNK	Y	278	P	no	482.651	2293.39	2107.4	1618.49	1807.6	1701.94	2.9	14.9	13.8	10.3	11.5	10.9
1070	2	A0A0H3BWH3	Putative calcium-transporting ATPase OS=Streptococcus pyogenes serotype M49 (strain NZ131) OX=471876 GN=pacL PE=4	TSREGLTSAQAKERL	S	31	M L	no	2249.2	19018.8	20452.7	19248.5	19742.3	17486.1	288.7	3185.4	3227	2939.4	3074.6	2742
2533	3	A0A0H3BZN1	Uncharacterized protein OS=Streptococcus pyogenes serotype M49 (strain NZ131) OX=471876 GN=Spy49_1218c PE=4	TVENLTASKERLTLD	S	63	M P	no	2109.03	17834.1	21513.4	11203.7	19291.9	16430.4	361.6	3736.7	4332.2	2280.4	3840	3444.2
3242	2	A0A0H3BZW4	Streptolysin S export ATP-binding protein (SagG) OS=Streptococcus pyogenes serotype M49 (strain NZ131) OX=471876 GN=sagG PE=4	TVGIDPQSRNHILES	S	169	M	no	121.536	12136.1	7689.01	6791.65	6831.96	7384.85	79.8	1949.9	1310.3	1111.3	1143.9	1207.4
6197	2	B5XJZ7	Uracil phosphoribosyltransferase OS=Streptococcus pyogenes serotype M49 (strain NZ131) OX=471876 GN=upp PE=3	VDIQTPVSKTVQKQL	S	60	P	no	909.064	6053.52	3498.51	3154.67	3065.64	2678.11	107.9	840.4	495.1	440.2	423.8	370.6
3682	2	A0A0H3C0G3	Uncharacterized protein OS=Streptococcus pyogenes serotype M49 (strain NZ131) OX=471876 GN=Spy49_1599c PE=4	VEKDIADSTVIVSYT	S	234	M P	no	511.412	11040.4	13829.1	6510.21	11651.6	10658.2	102.7	3048.9	3729.7	1826.8	3201.9	3005.9
982	2	A0A0H3C0S1	Putative sugar ABC transporter OS=Streptococcus pyogenes serotype M49 (strain NZ131) OX=471876 GN=Spy49_0972c PE=4	VGLNPHASEYAGMSS	S	231	M	no	479.221	35738.8	37321.4	20449.9	35501.6	27445.3	693.3	39291.7	40638.8	22068.1	38934.7	30178.3
1847	1	A0A0H3BZJ0	Formate acetyltransferase OS=Streptococcus pyogenes serotype M49 (strain NZ131) OX=471876 GN=pfl PE=3	VIVRISGYCVNTKYL	Y	739	M P	no	3259.77	14526.4	14805.9	10916.6	14144.5	12238.1	140.2	190.2	195.4	141	180.7	160.6
2009	2	A0A0H3BVU9	Response regulator CsrR OS=Streptococcus pyogenes serotype M49 (strain NZ131) OX=471876 GN=csrR PE=4	VLNPQNRSVNRGDDE	S	145	P	no	1023.23	8443.58	9303.84	4237.95	8251.46	7009.03	72.4	696.2	789.9	345	680.6	559
1012	2	B5XM82	Exodeoxyribonuclease 7 small subunit OS=Streptococcus pyogenes serotype M49 (strain NZ131) OX=471876 GN=xseB PE=3	VPLEEAISEFQKGML	S	33	M	no	2887.17	73892.4	43762.6	38733.8	36745.8	36539	3929.1	79130.5	47289.4	47854.1	44938.8	43551.1
323	2	A0A0H3C1S1	Chaperone protein DnaJ OS=Streptococcus pyogenes serotype M49 (strain NZ131) OX=471876 GN=dnaJ PE=3	VSYNREATCGTCSGS	T	146	M P L	no	4342.27	53649.7	75285.4	33477.8	71596	60941.2	317.5	3866.5	5292.4	2405.9	5083.3	4423
343	2	B5XKI2	Triosephosphate isomerase OS=Streptococcus pyogenes serotype M49 (strain NZ131) OX=471876 GN=tpiA PE=3	WAIGTGKSATQDDAQ	S	178	M P L	no	9016.57	60948	60690.9	55275.4	64311.3	55922.5	88.4	952.4	952.9	883.2	1018.9	907.1
9092	2	A0A0H3C1H3	Fructose-bisphosphate aldolase class II OS=Streptococcus pyogenes serotype M49 (strain NZ131) OX=471876 GN=fba PE=4	YEANEAEYDGKKLFD	Y	257	P	no	319.356	3109.74	3333.76	1543.95	3097.61	2798.75	3.3	36.7	40.7	18.9	36.3	33.9
1468	1	A0A0H3BZ11	Phosphoglucomutase OS=Streptococcus pyogenes serotype M49 (strain NZ131) OX=471876 GN=pgmA PE=3	YLRQELLSMDEKTKE	S	26	P	no	990.495	12163.6	9603.52	8477.51	9291.44	7698.3	83.7	1024	804.1	694.5	776.1	624.5
575	1	A0A0H3BZT0	Uncharacterized protein OS=Streptococcus pyogenes serotype M49 (strain NZ131) OX=471876 GN=Spy49_1297c PE=4	YREAFYISNENKAKQ	S	282	M L	no	3305.05	30410.7	29969.7	22786.2	26900.4	23181.7	586.2	3603.3	3877.6	2738.3	3279.4	2878.2
