# Supplementary figures and images for: Dynamic Protein Phosphorylation in Streptococcus pyogenes during Growth, Stationary Phase, and Starvation
Source: MDPI journal article supplement (doi:10.3390/microorganisms12030621), 2024-03-20

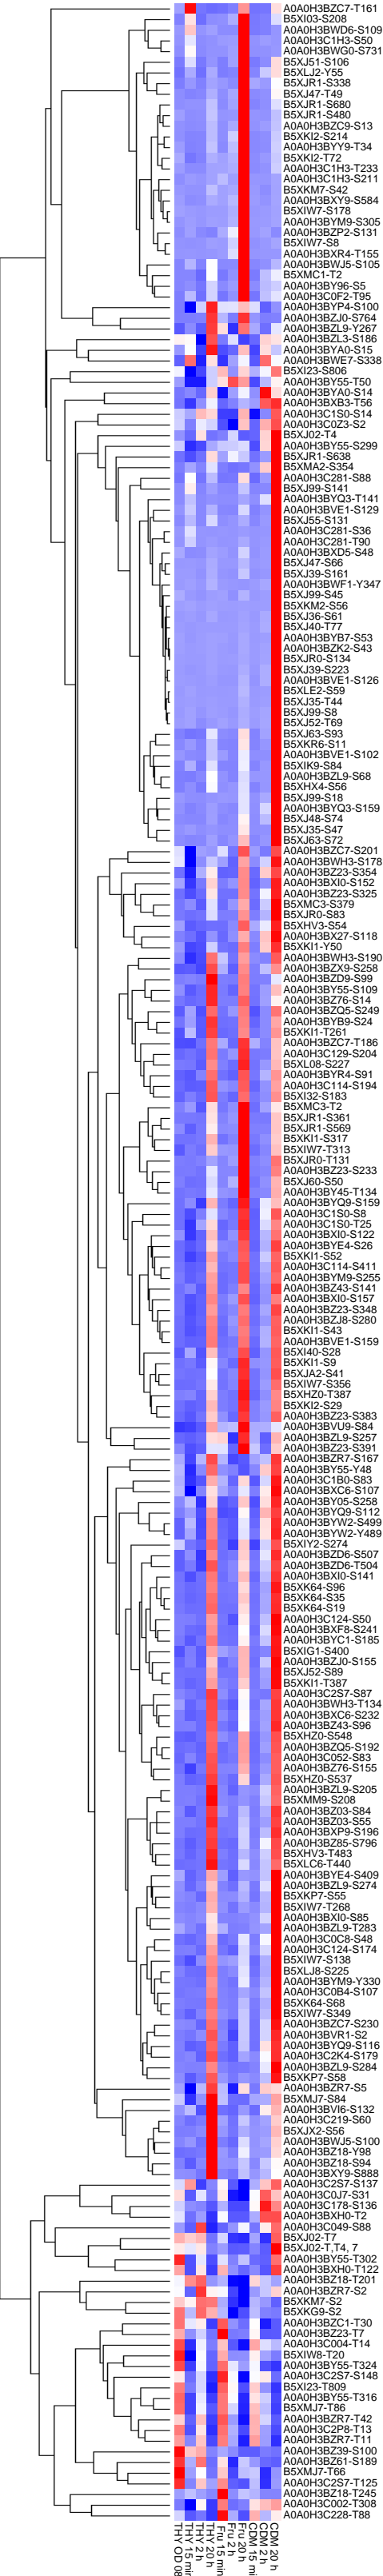

Data Distribution

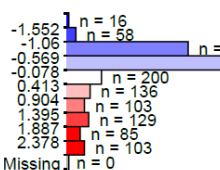

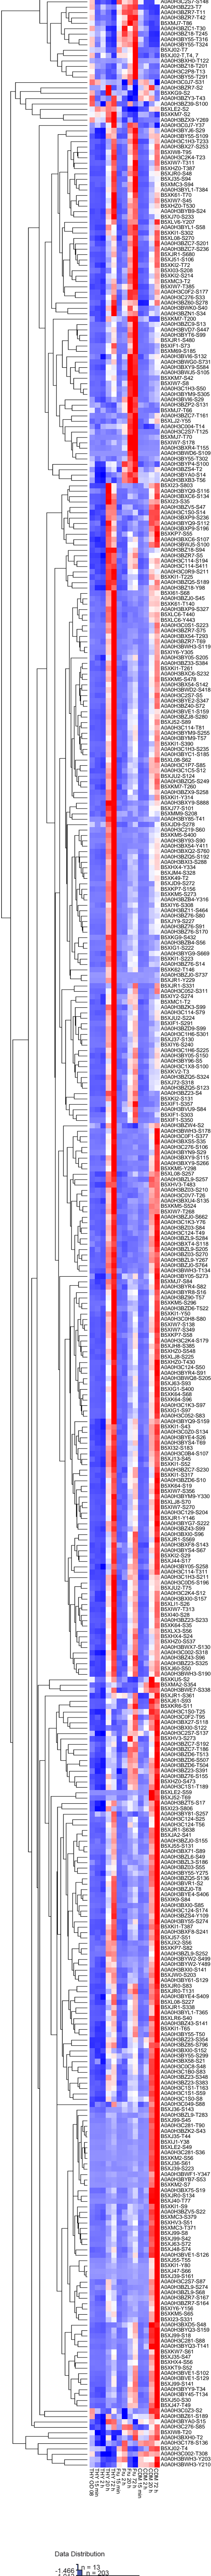

Data Distribution

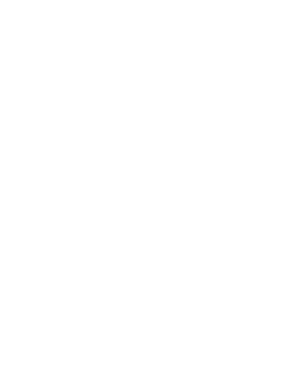

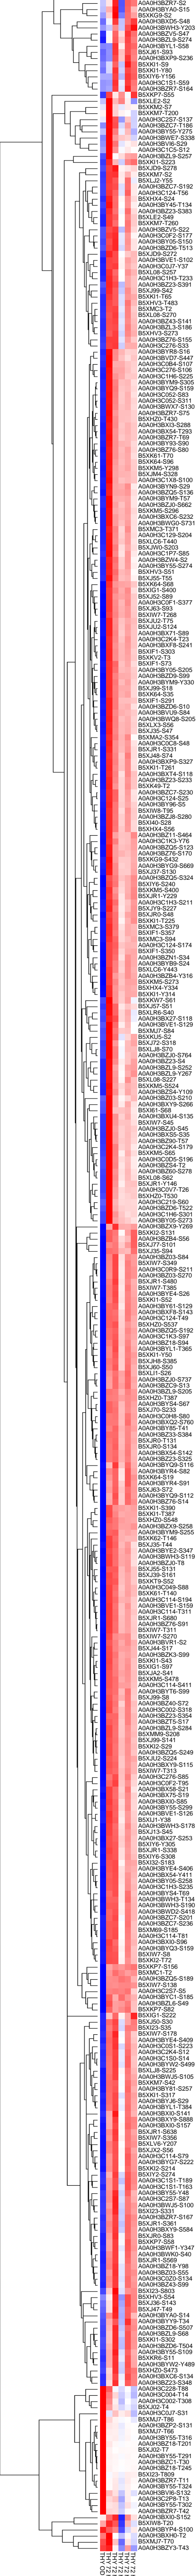

Data Distribution

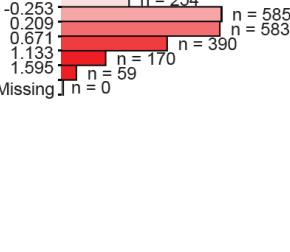

Supplement: s1 [file s1]
